# Supplementary material
Source: PubMed Central journal article supplement (PMC8740888)
Supplement: 10.1182-2021012327_bloodbld2021012327-suppl1.pdf [file 10.1182-2021012327_bloodbld2021012327-suppl1.pdf]

## **Supplemental Methods**

### **Cell lines and culture conditions**

DLBCL cell lines OCI-LY1 and SUDHL2 were cultured in Iscove's Modified Dulbecco's Medium (IMDM) supplemented with 20% Fetal Bovine Serum (FBS) and 100 µg/mL penicillin/streptomycin. SUDHL6, SUDHL8, SUDHL10, Karpas-422, DB were cultured in Roswell Park Memorial Institute (RPMI) 1640 supplemented with 20% Fetal Bovine Serum (FBS) and 100 µg/mL penicillin/streptomycin. All cells were maintained in a humidified 37°C/5% CO<sub>2</sub> incubator.

### **Cell proliferation assay**

Cell proliferation was analyzed using a Cell Counting Kit-8 (YEASEN, P.R.China). Briefly, the cells were seeded onto 96-well plates at a density of 5000 cells per well. Ten microliters of CCK-8 was added to each well at 24 h, 48 h or 72 h, respectively, and incubated at 37 °C for 4h. Subsequently, the absorbance of live cells was measured at 450 nm using a microplate reader.

### **Annexin V APC/ 7AAD apoptosis detection assay**

Detection of apoptosis was performed using the Annexin V-APC Apoptosis Detection Kit II (BD Bioscience, San Jose, CA) according to manufacturer's protocol.

### **Cell cycle assay**

The cell cycle assay was performed using APC BrDU Kit (BD Biosciences, San Jose,

CA, USA) according to the manufacturer's instructions.

### **RNA isolation and Real-time PCR**

Total RNA from mice tumor tissue and cell samples was extracted using TRIzol Reagent (TIANGEN, Beijing, P.R.China). NanoDrop was used to measure RNA quality and quantity. One microgram of total RNA was then reverse-transcribed using FastKing gDNA Dispelling RT SuperMix (TIANGEN, Beijing, P.R.China). Real-time analysis was then performed using the SYBR green master mix with sequence-specific predesigned primers (Takara, Shiga, Japan). For quantitative analysis, target gene values were normalized to GAPDH or 18S gene expression using the  $\Delta\Delta CT$  value method. Primer sequences are listed in the Supplemental Methods.

### **CHIP-Seq and data processing**

Sequencing library was prepared by converting 10 ng DNA of each sample to phosphorylated blunt-end fragment. An 'A' base was added to the 3' end of the blunt phosphorylated DNA fragments, and Illumina's genomic adapters were ligated to the A tailed DNA fragments prior to subject to PCR amplification to enrich ligated fragments. The enriched product of ~200-1500 bp was size selected using AMPure XP beads. The library was denatured with 0.1M NaOH to generate single-stranded DNA molecules, and loaded onto channels of the flow cell at 8pM concentration, amplified in situ using Cluster Kit. Sequencing was carried out by running 2×150

cycles on Illumina NovaSeq 6000 according to the manufacturer's instructions. After the sequencing platform generated the sequencing images, the stages of image analysis and base calling were performed using Off-Line Basecaller software (OLB V1.8). Sequence quality was examined using the FastQC software. After passing Solexa CHASTITY quality filter, the clean reads were aligned to human reference genome UCSC HG19 using BOWTIE (V2.1.0). Aligned reads were used for peak calling of the ChIP regions using MACS V1.4.2. Statistically significant ChIP-enriched regions (peaks) were identified by comparison of IP vs Input or comparison to a Poisson background model, using a p-value threshold of  $10^{-4}$ . The EXCEL/BED format file containing the ChIP-enriched regions was generated for each comparison. The peaks were annotated by the nearest gene using the newest UCSC RefSeq database.

### **ChIP Assay**

A Pierce Agarose ChIP Kit was purchased from Cell signaling Technology (Danvers, MA, USA). Cells were cross-linked with 1% formaldehyde for 10 minutes at room temperature and terminated by adding glycine (1.25 M). Fixed cells were harvested in SDS buffer with a protease inhibitor and then sonicated to generate DNA fragments of 200–1000 base pairs (bp) in length. The sheared chromatin-lysed extracts were incubated overnight at 4 °C with the anti-SOX9 antibody or control IgG with rotation. After immunoprecipitation (IP) of the cross-linked protein/DNA, the immunocomplexes were reversed to free DNA. PCR was performed with the input DNA or the

immunoprecipitates products. The PCR products were then separated by agarose gel electrophoresis.

### **Cholesterol quantitation assay**

The concentration of cholesterol was measured by Cholesterol/Cholesteryl Ester Quantitation Assay kit (Abcam, MA, USA). In brief,  $1 \times 10^6$  of DLBCL cells or 10mg of mice tumor tissues with indicated treatment were centrifuged and the pellet was re-suspended in 200  $\mu$ l of Chloroform:Isopropanol:NP-40 (7:11:0.1) solution using a micro homogenizer. The liquid in organic phase was then taken out and transferred into a new eppendorf tube after spinning at 15,000 g for 10 min followed by air dry at 50 °C, and vacuumed for 30 min. The dried lipids were re-dissolved in 200  $\mu$ l kit provided assay buffer using sonicator and vortex mixer according to instruction manual. After addition of either cholesterol assay buffer, cholesterol probe, cholesterol enzyme mix or cholesterol esterase, the OD value of each sample was measured by spectrophotometer ( $\lambda = 570$  nm).

### **Plasmids construction and dual-luciferase reporter assay**

DHCR24 promoter-luciferase reporter plasmids containing the DHCR24 promoter region were constructed in the pGL3 plasmid. Wild-type and mutants DHCR24 promoter luciferase constructs were verified by DNA sequencing. A dual luciferase reporter assay (Promega, WI, USA) was performed according to the manufacturer's instructions.

## **Animal studies**

All experiments were performed under an Institutional Animal Care and Use Committee-approved protocol of Shanghai Jiaotong University School of Medicine, and guidelines for the proper use of animals in research and animal welfare were followed. 6-8 weeks old female nude mice were purchased from Shanghai Ling Chang Biotechnology Co (Shanghai, China). Karpas-422-shSOX9, parental Karpas-422 and SUDHL8 xenografts mice were established in the flanks of 6-weeks-old female nude mice by injecting approximately 10 million cells in 50% Matrigel. Mice bearing established xenografts (tumor volume, 100–200 mm<sup>3</sup>) were randomized into control or drugs treatment groups, and treated either with or without i.p. injections of 10mg/kg U18666A (every two days) at every other day for 7 days, or 10 mg/kg simvastatin with oral administration at every other day for 7 days. Tumor sizes were determined three times a week by directly measuring tumor with a caliper. Tumor volumes were calculated using the formula: length × width × width/2. The fold change of tumor volume was determined by normalizing each tumor measurement to its volume on day 0 at the beginning of drug administration.

## **Statistical analyses**

Two-sided Student's t test was used to compare differences between two groups. Data are presented as means ± SD and p%0.05 was considered as statistical significant. Two-way Analysis of variance (ANOVA) was used on assays involving at

least three groups for comparison. The association between SOX9 and categorical variable was tested by Fisher's exact test. Progression-free Survival (PFS) time was calculated from date of treatment to date of progression or date of last follow-up, whichever comes first. Kaplan-Meier estimator was used to estimate survival probability. Survival difference between groups was tested by log-rank test for statistical significance. Confidence interval of survival rate was calculated by Greenwood's formula. All statistical tests were two-sided with an alpha level of 0.05 as the significance cutoff. All analyses were performed in statistical software SAS Version 9.4 (SAS Institute, Cary, NC).

# Supplemental Figure 1

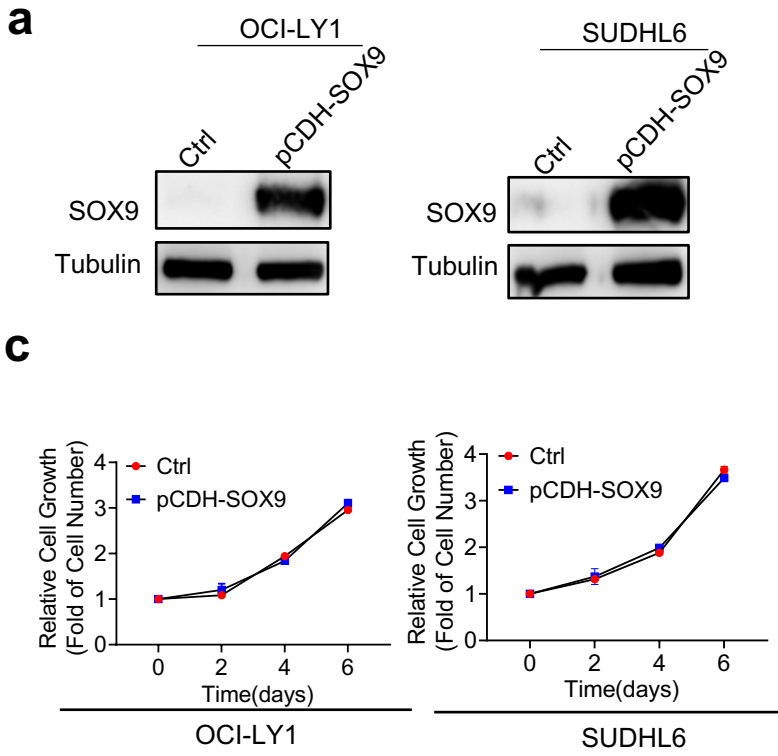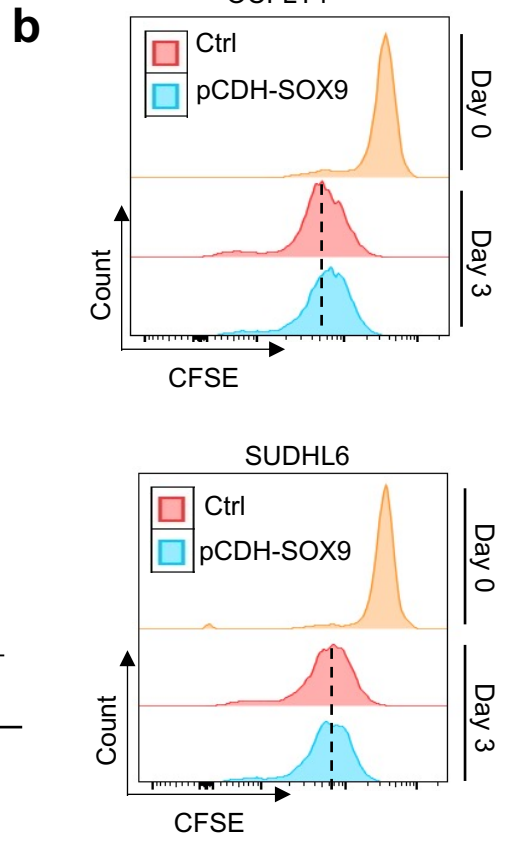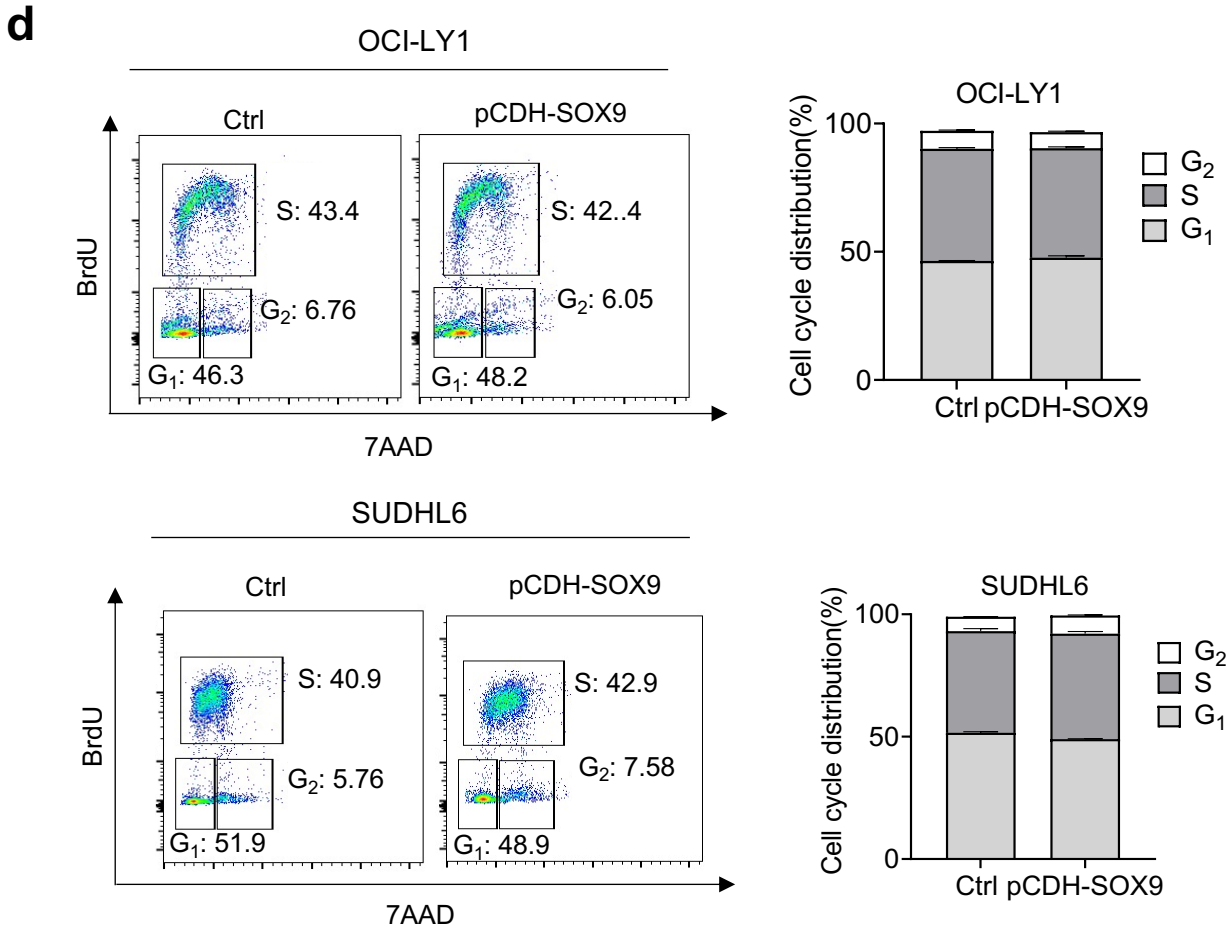

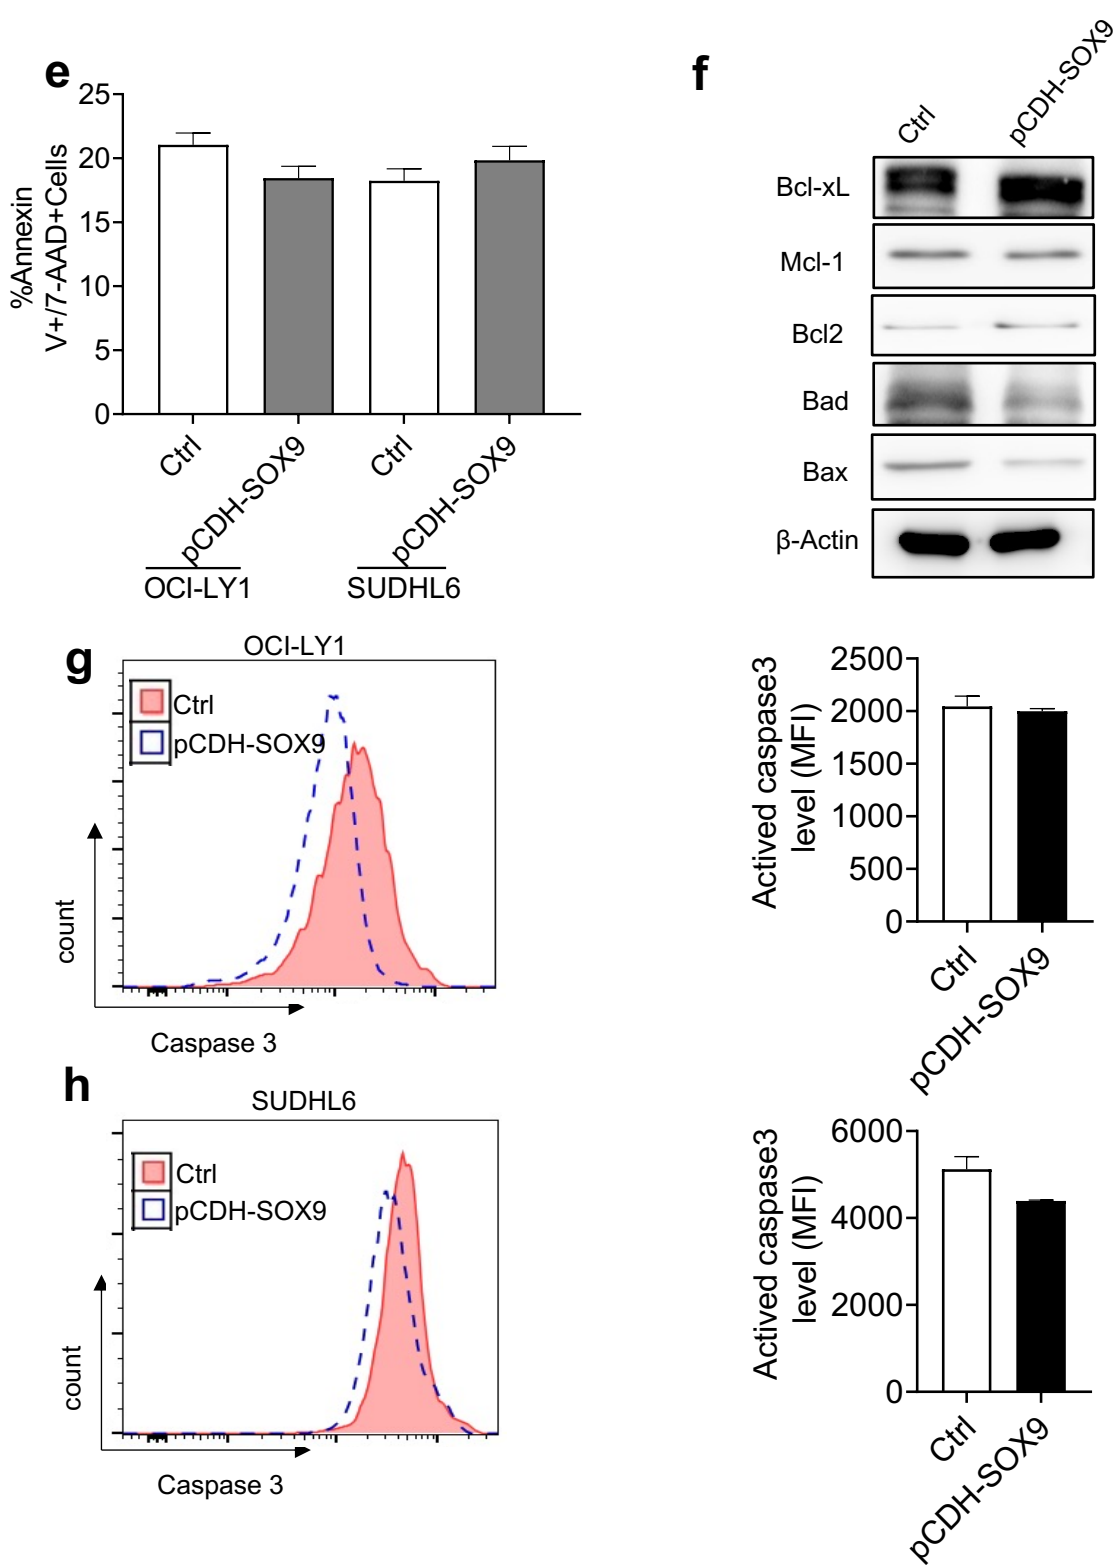

**Supplemental Figure 1. Overexpression of SOX9 has no significant impacts on DLBCL cells.** (a) Immunoblotting of SOX9 overexpression efficiency. (b) CFSE proliferation assay (c) hemocytometer counts of cell numbers were determined in lentiviral encoding pCDH-SOX9 overexpressing OCI-LY1 and SUDHL6 cells. (d) OCI-LY1 cells or SUDHL6 cells transduced with lentiviral encoding pCDH-SOX9 were exposed to BrdU for 4 h prior to subject to flow cytometry analysis of cell cycle. Quantitation of percentage of cell cycle distribution was determined by gating of live cells in either G<sub>1</sub> (light grey bar), S (dark grey bar) or G<sub>2</sub> (white bar) phases. (e) Annexin V/7ADD apoptosis assay in OCI-LY1 cells or SUDHL6 cells transduced with lentiviral encoding pCDH-SOX9. (f) Immunoblotting assay of expressions of Bcl-xL, Mcl-1, Bcl-2, Bad and Bax proteins. Flow cytometry determine of caspase 3 activity (shift & MFI) in (g) OCI-LY1 cells or in (h) SUDHL6 cells transduced with lentiviral encoding pCDH-SOX9 (dashed line). Scramble control was included as a negative control (shaded area).  $\beta$ -Actin was included as a control for equal loading. Data in (a)-(h) represent the mean  $\pm$  SD from technical triplicates.



## Supplemental Figure 2

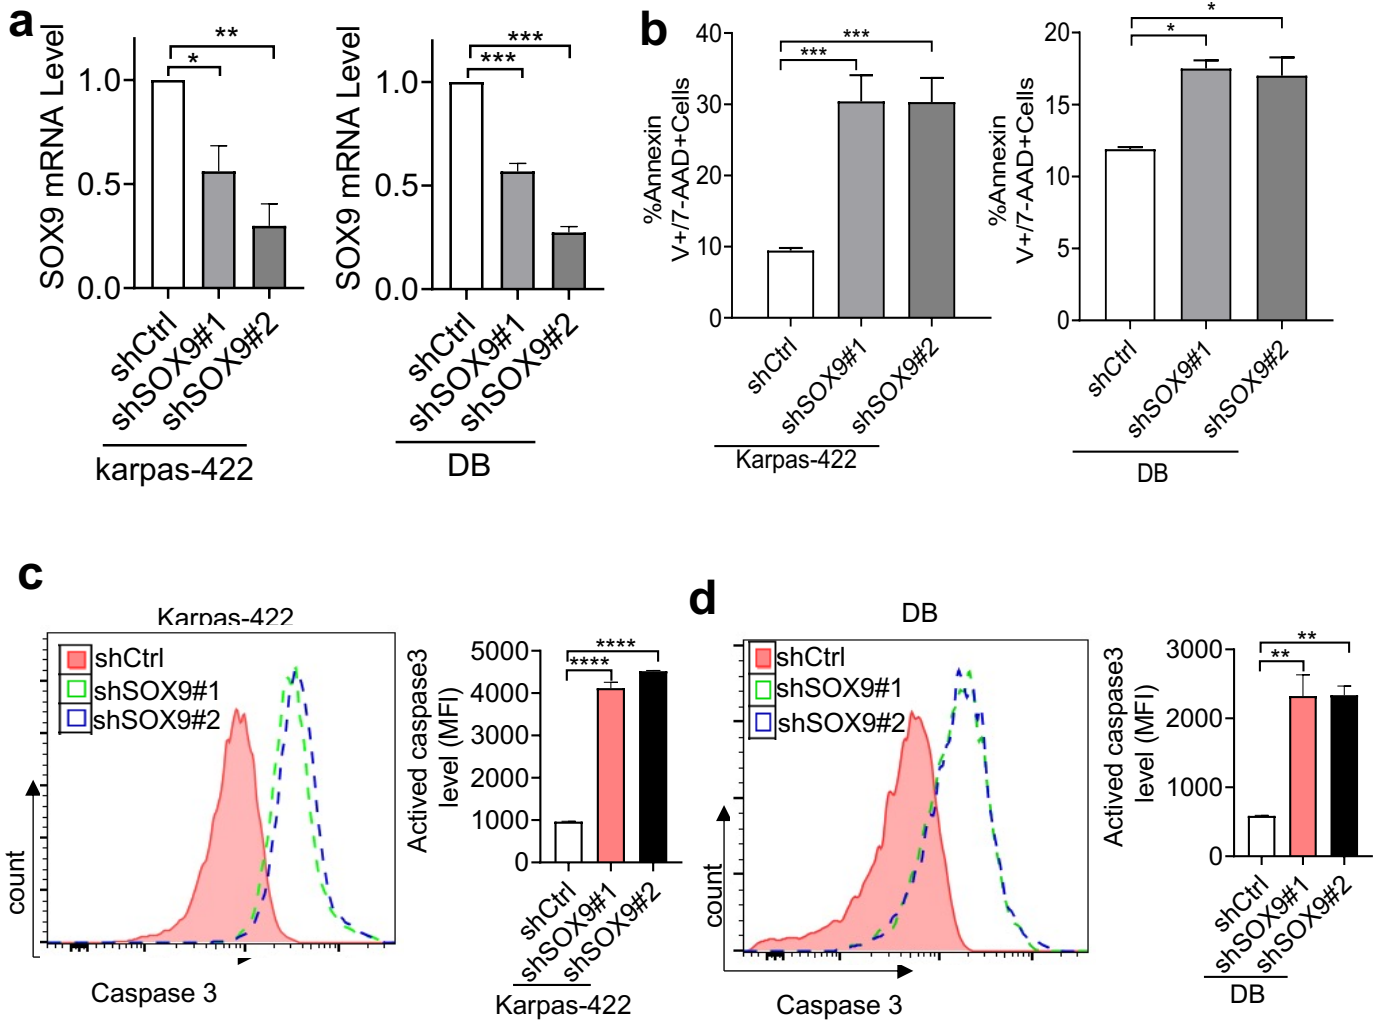

**Supplemental Figure 2. Knockdown of SOX9 impairs DLBCL cell survival.** (a) Real-time PCR analysis of SOX9 mRNA level in Karpas-422 and DB cells upon shRNA treatment. (b) Annexin V/7ADD apoptosis assay in lentiviral encoding SOX9 shRNAs overexpressing Karpas-422 cells and DB cells. Flow cytometry determine of caspase 3 activity (shift & MFI) in shSOX9#1 (green dashed line), shSOX9#2 (blue dashed line) transduced (c) Karpas-422 cells or (d) DB cells. Scramble control was included as a negative control (shaded area). Data in (a)-(d) represent the mean  $\pm$  SD from technical triplicates. (\* $p < 0.05$ ; \*\* $p < 0.01$ ; \*\*\* $p < 0.001$ ; \*\*\*\*  $p < 0.005$ ).

# Supplemental Figure 3

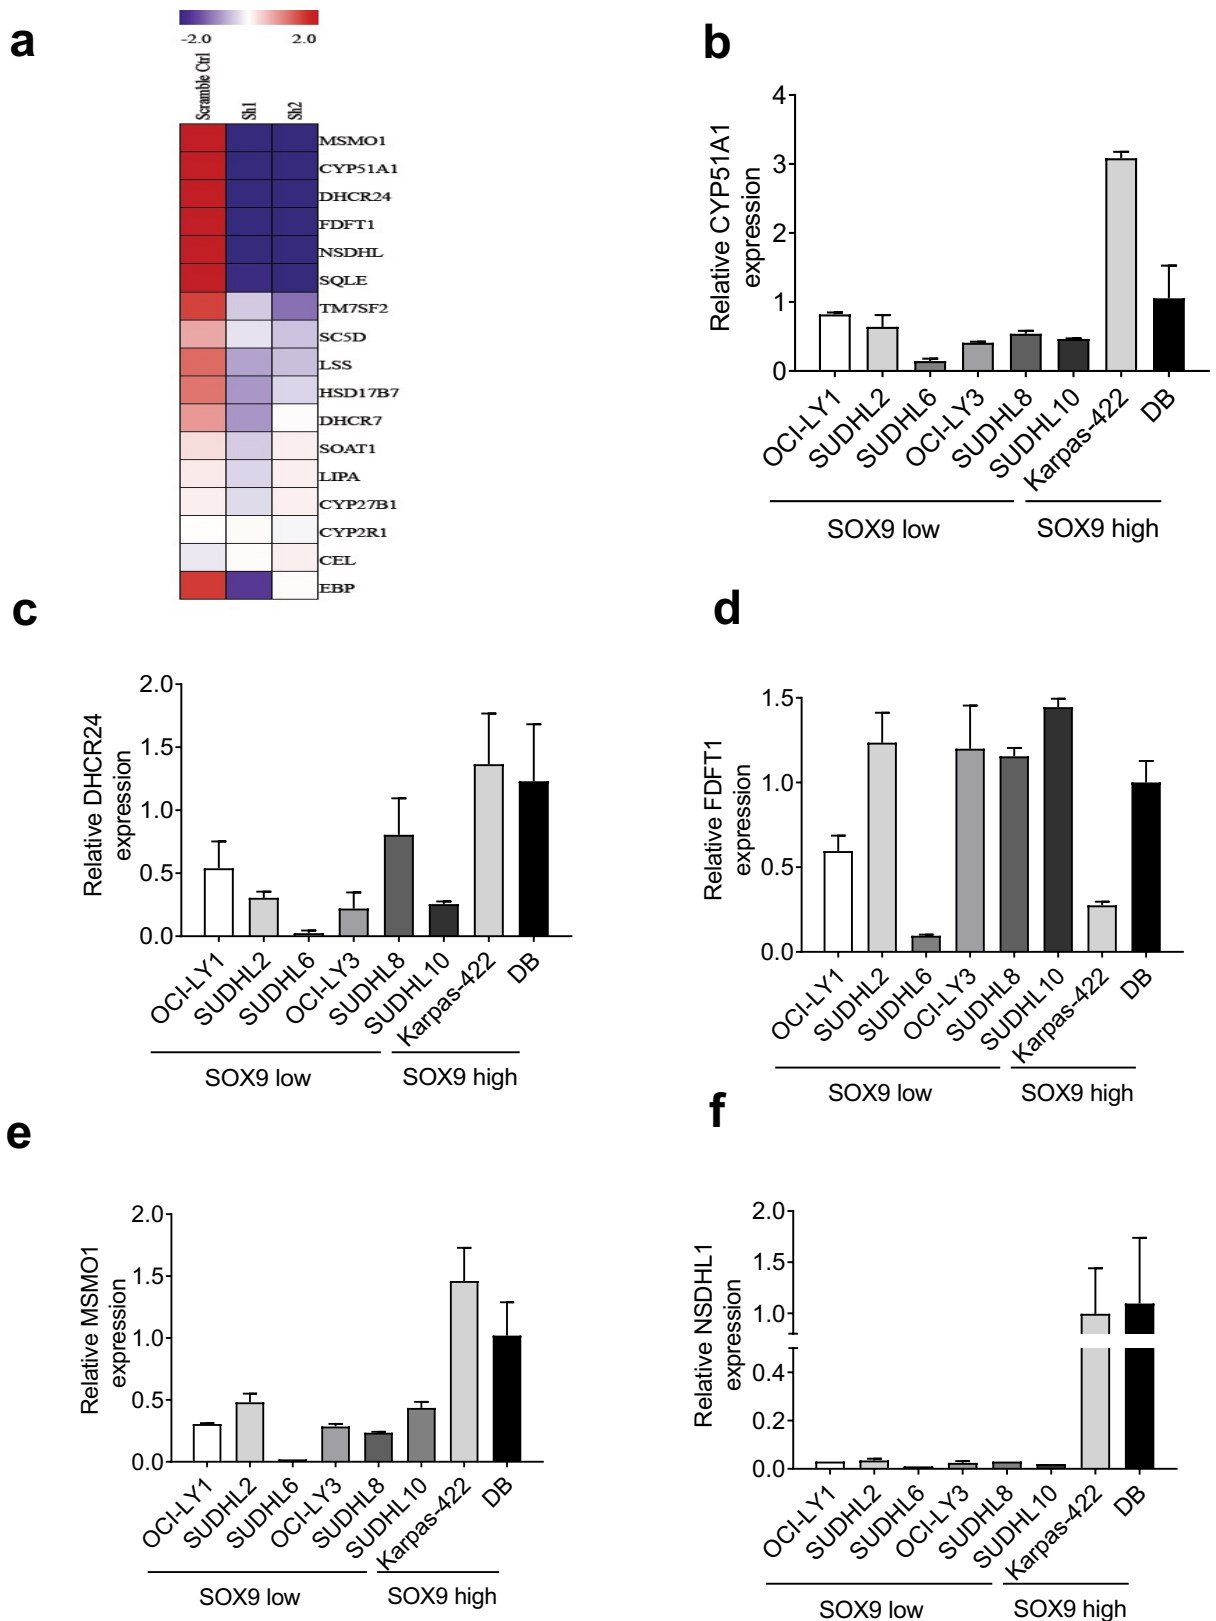

**Supplemental Figure 3. cholesterol biosynthesis targeted genes were upregulated in SOX9 high DLBCL cells.** (a) Heat map comparison of expressions of steroid biosynthesis-related genes in SOX9 deficient Karpas-422 cells compared to scramble control. qRT-PCR validation of expressions of (b) CYP51A1, (c) DHCR24, (d) FDFT1, (e) MSMO1 and (f) NSDHL1 relative expressions in SOX9 low and SOX9 high DLBCL cells. Data in (a)-(f) represent the mean  $\pm$  SD from technical triplicates.

# Supplemental Figure 4

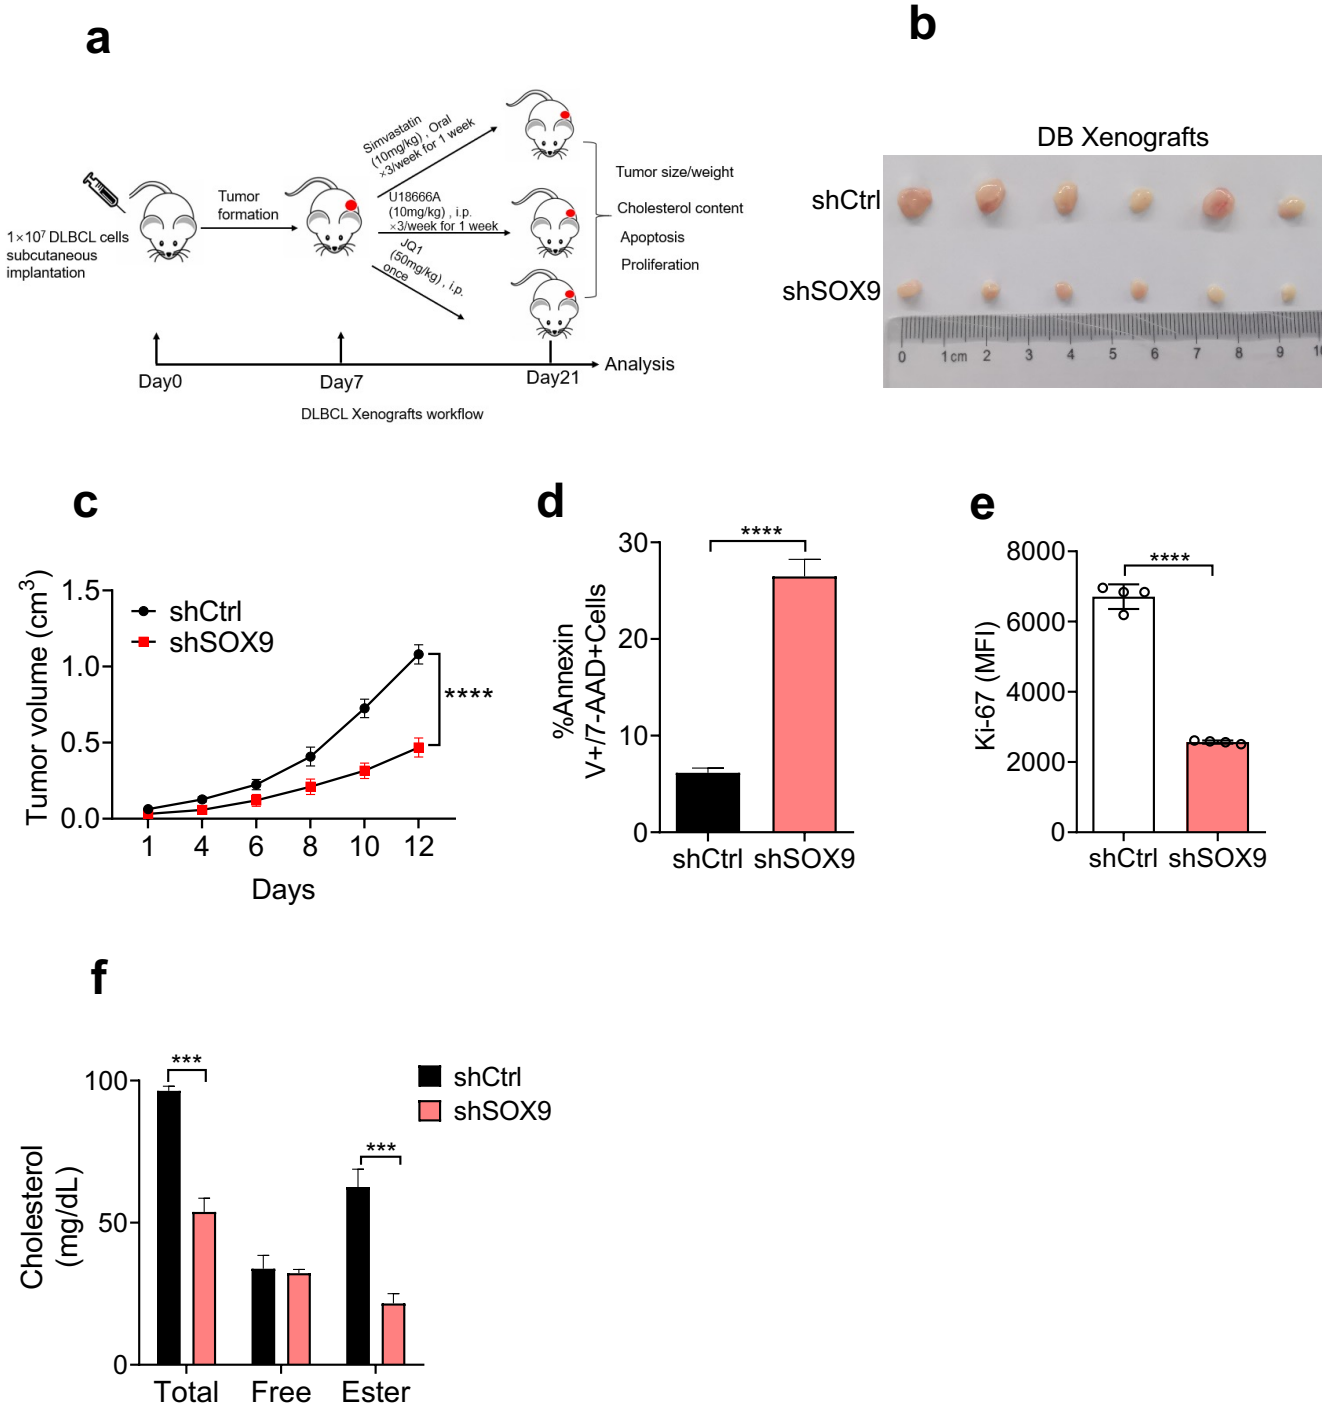

**Supplemental Figure 4. Silence of SOX9 inhibits tumor growth and cholesterol biosynthesis in DB xenografts.** (a) Schematic representation of DLBCL xenografted mouse model and procedure for drug treatment. (b) tumor size (c) tumor volume (d) apoptosis (e) cell proliferation and (f) cholesterol content were determined in SOX9 deficient DB xenografts (n=5). Data in (b)-(f) represent the mean  $\pm$  SD from technical triplicates (\*\*p<0.001; \*\*\*\*p<0.005).

# Supplemental Figure 5

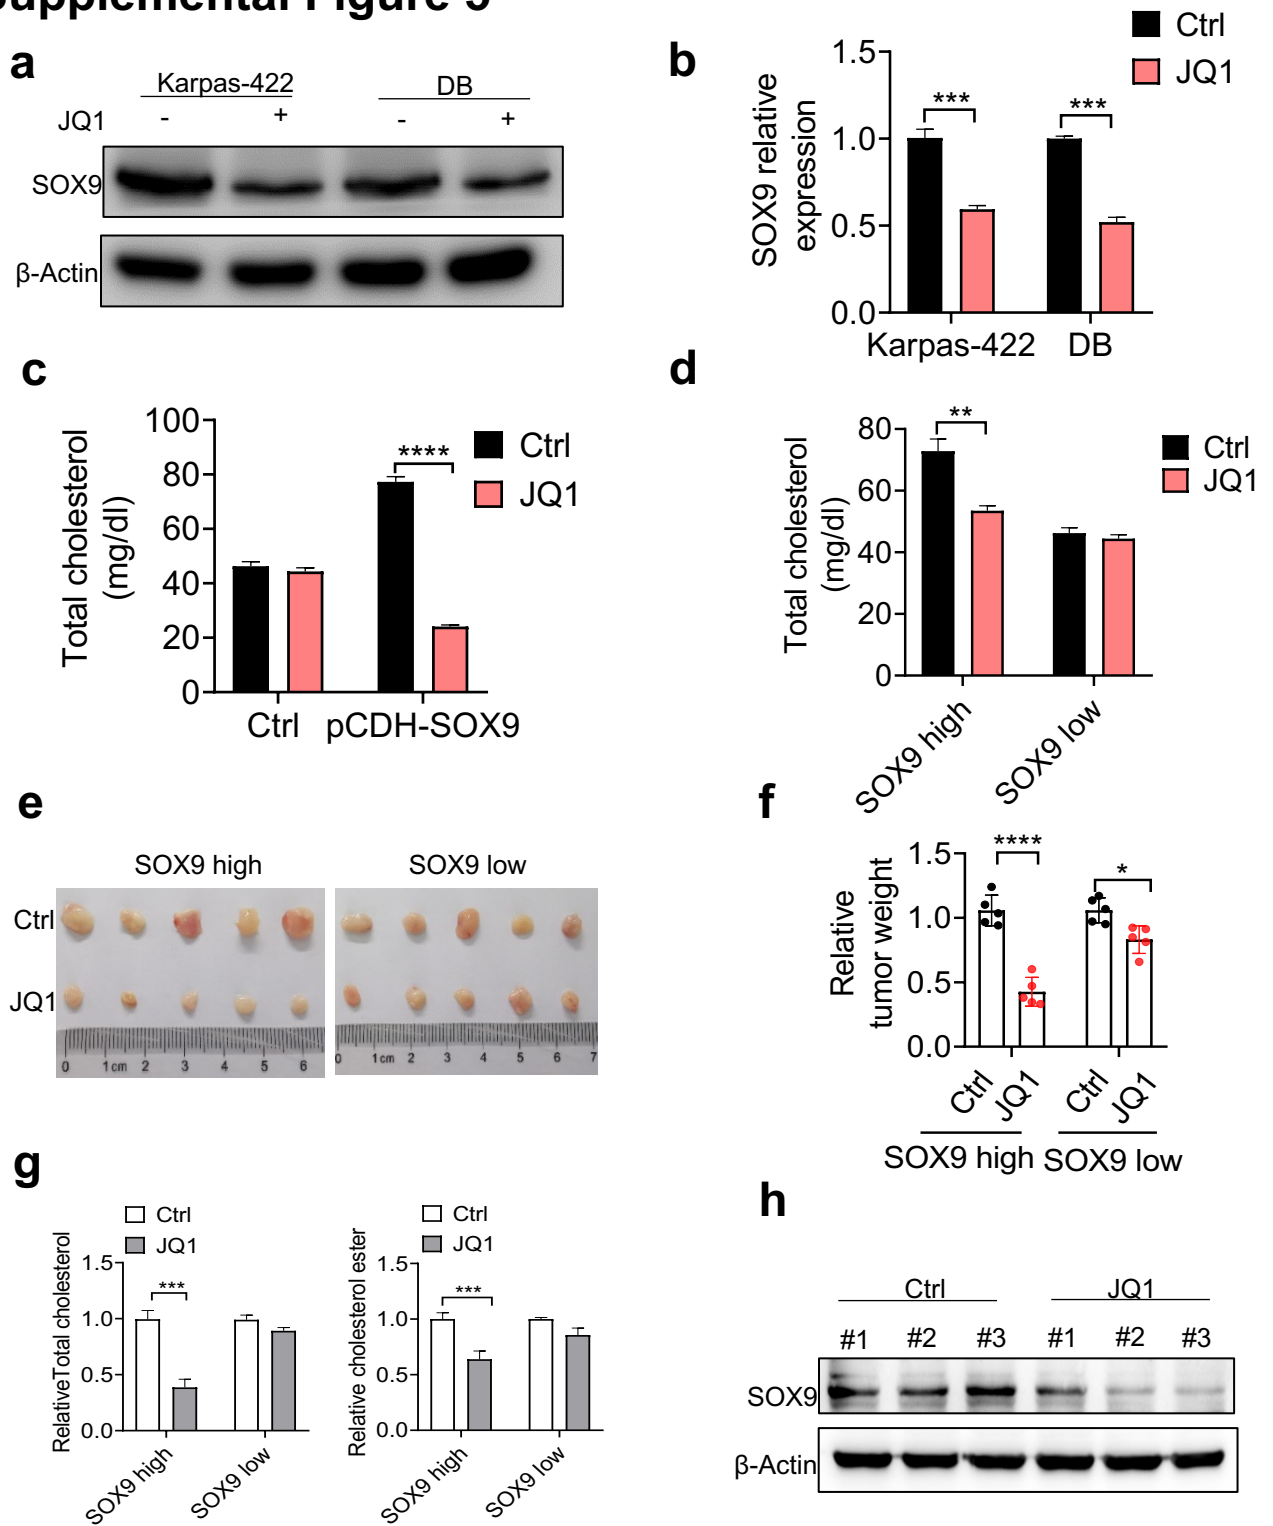

**Supplemental Figure 5. JQ1 inhibits DLBCL tumor growth and cholesterol biosynthesis in a SOX9 dependent manner *in vitro* and *in vivo*.** (a) Immunoblotting assay or (b) Real-time PCR analysis of SOX9 protein expression or mRNA level in Karpas-422 and DB cells either treated with JQ1 or vehicle control at 48 h time point. Cholesterol content were measured in (c) OCI-LY1 cells transduced with lentiviral encoding pCDH-SOX9 or in (d) SOX9 high (Karpas-422) and SOX9 low (SUDHL6) cells were treated either with JQ1 (0.5  $\mu$ M) or with vehicle control at 48 h time point. Ten millions of DLBCL cells harboring a high level of SOX9 (Karpas-422) or a low level of SOX9 (SUDHL6) were subcutaneously injected into each nude mouse (n=5). Meanwhile, 50 mg/kg JQ1 was intraperitoneal injected into above mentioned DLBCL xenografted mice. Three weeks post transplantation and drug administration, mice were sacrificed and (e) tumor size, (f) relative tumor weight as well as (g) relative cholesterol contents were measured in these mice. (h) SOX9 high cell line (Karpas-422) xenografted mice were either treated with JQ1(50 mg/kg) or vehicle control as described above prior to subject to immunoblotting assay of SOX9 protein expression.  $\beta$ -Actin was included as a control for equal loading. Data in (a)-(h) represent the mean  $\pm$  SD from technical triplicates (\*p<0.05; \*\*\*p<0.001, \*\*\*\*p<0.005).

# Supplemental Figure 6

**a**

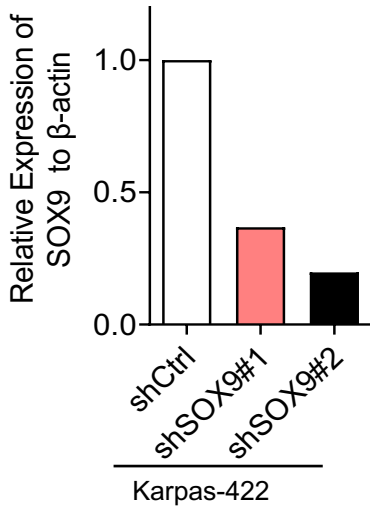

**b**

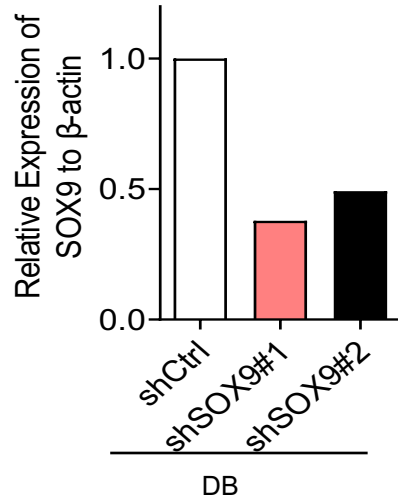

**c**

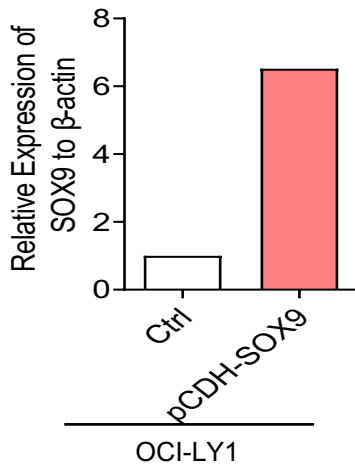

**d**

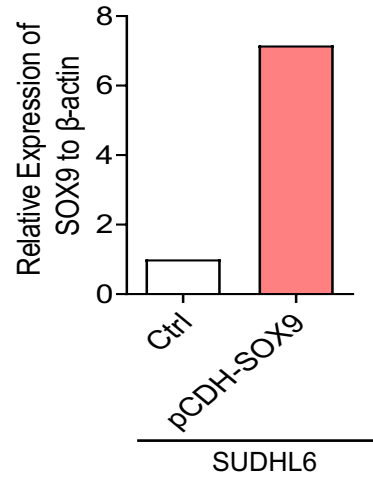

**Supplemental Figure 6. Densitometry quantitation of Figure 2a & Supplemental Figure 1a.** Immunoblotting assay of SOX9 protein expression in Karpas-422, DB, lentiviral encoding pCDH-SOX9 transduced OCI-LY1 or SUDHL6 cells was performed as previously described. Bands intensities were measured using Image J software and relative expressions of (a)-(d) SOX9 were determined in aforementioned cells. Scramble control or vector controls were denoted as 1.

## Supplemental Figure 7

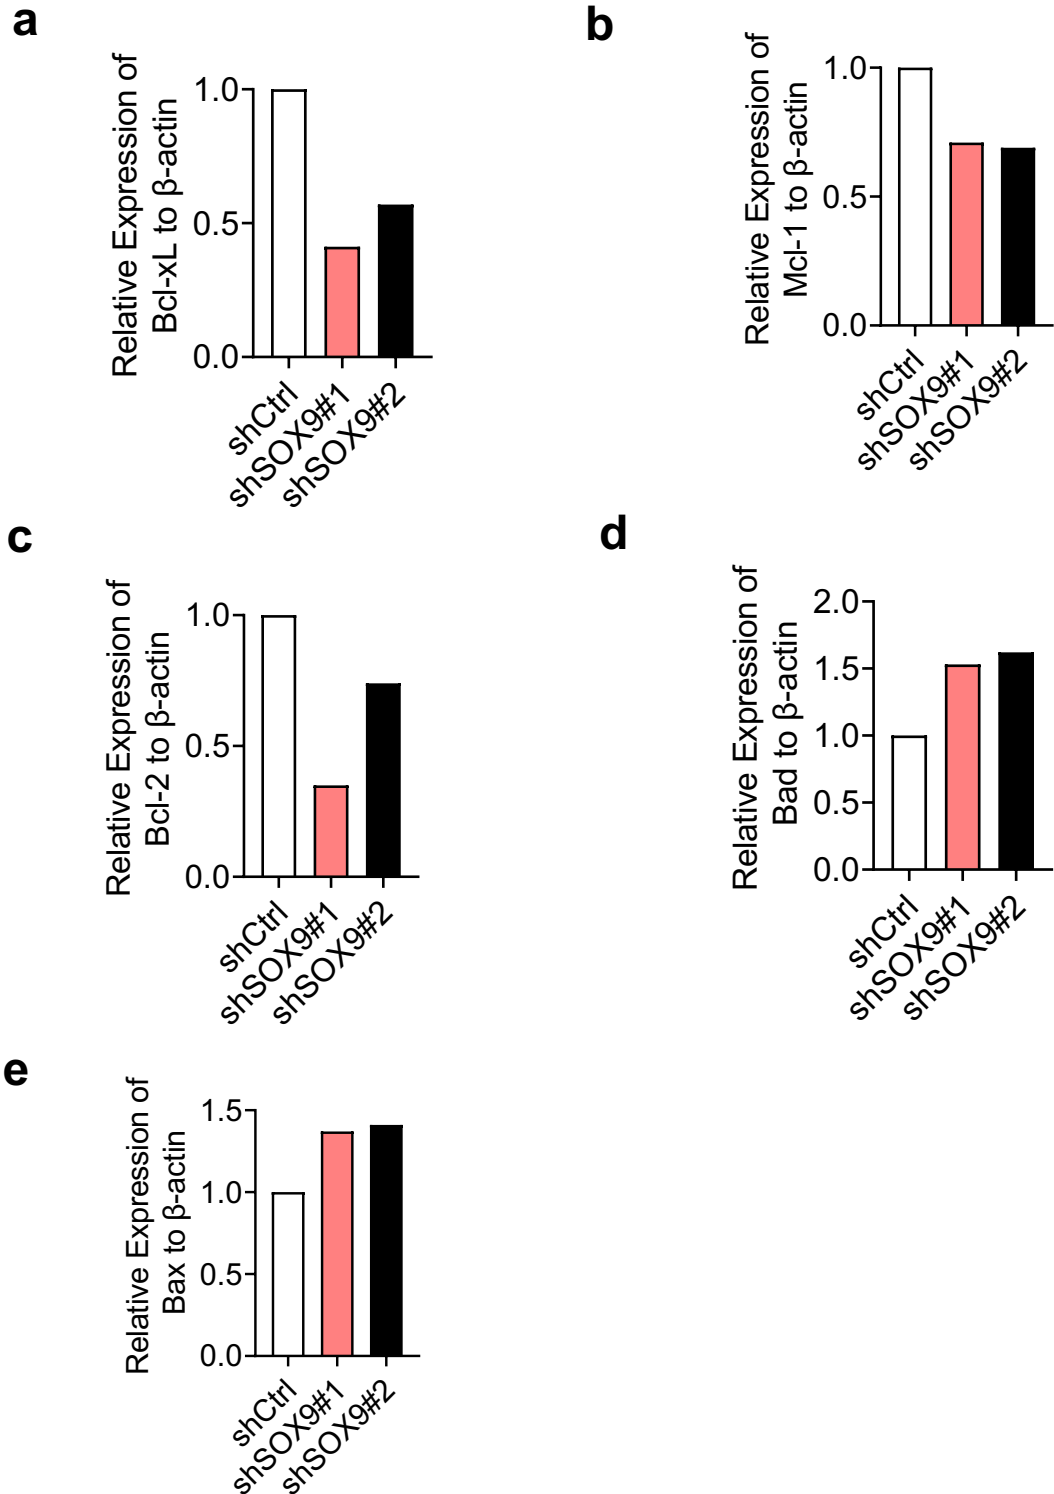

**Supplemental Figure 7. Densitometry quantitation of Figure 2e** . Immunoblotting assay of Bcl-xL, Bcl-2, Mcl-1, Bad and Bax protein expressions was performed as described previously. Bands intensities were measure using Image J software and relative expressions of **(a)** Bcl-xL **(b)** Mcl-1 **(c)** Bcl-2 **(d)** Bad and **(e)** Bax were determined in SOX9 shRNAs silenced Karpas-422 cells. Scramble control transduced cells were denoted as 1.

## Supplemental Figure 8

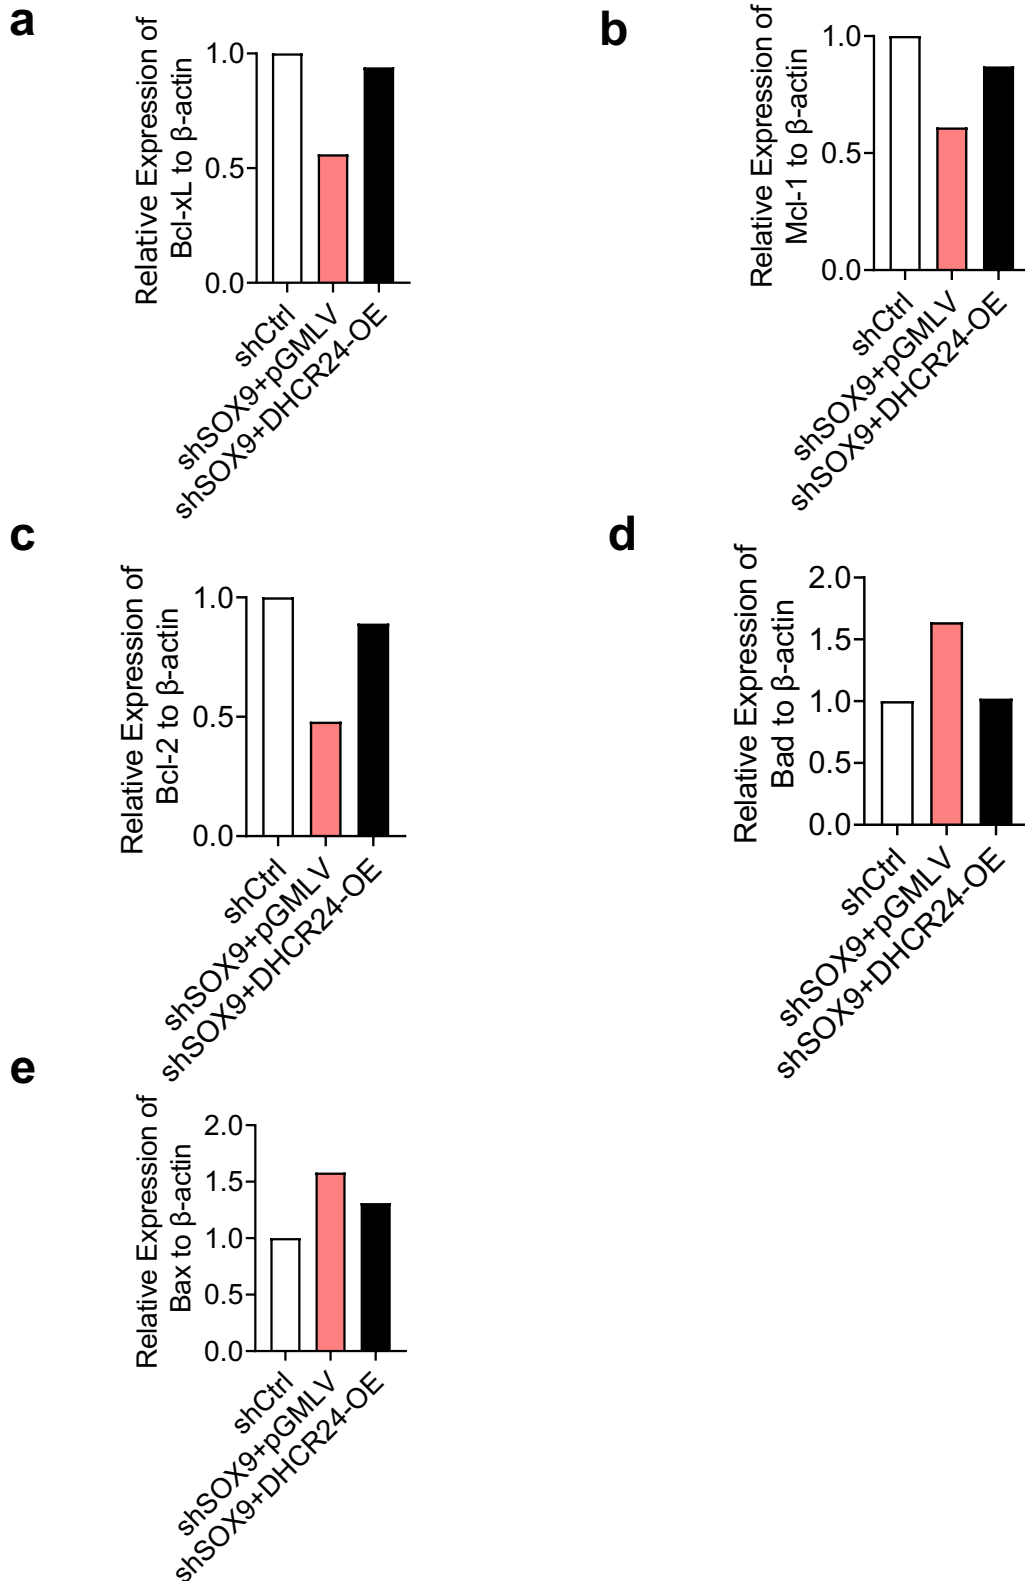

**Supplemental Figure 8. Densitometry quantitation of Figure 6f.** Immunoblotting of Bcl-xL, Mcl-1, Bcl-2, Bad and Bax was performed as described previously. Bands intensities were measured using Image J software and relative expressions of (a) Bcl-xL, (b) Mcl-1 (c) Bcl-2 (d) Bad and (e) Bax proteins were determined in DHCR24 lentiviral transduced SOX9 deficient Karpas-422 cells. Scramble control transduced cells were denoted as 1.

## Supplemental Figure 9

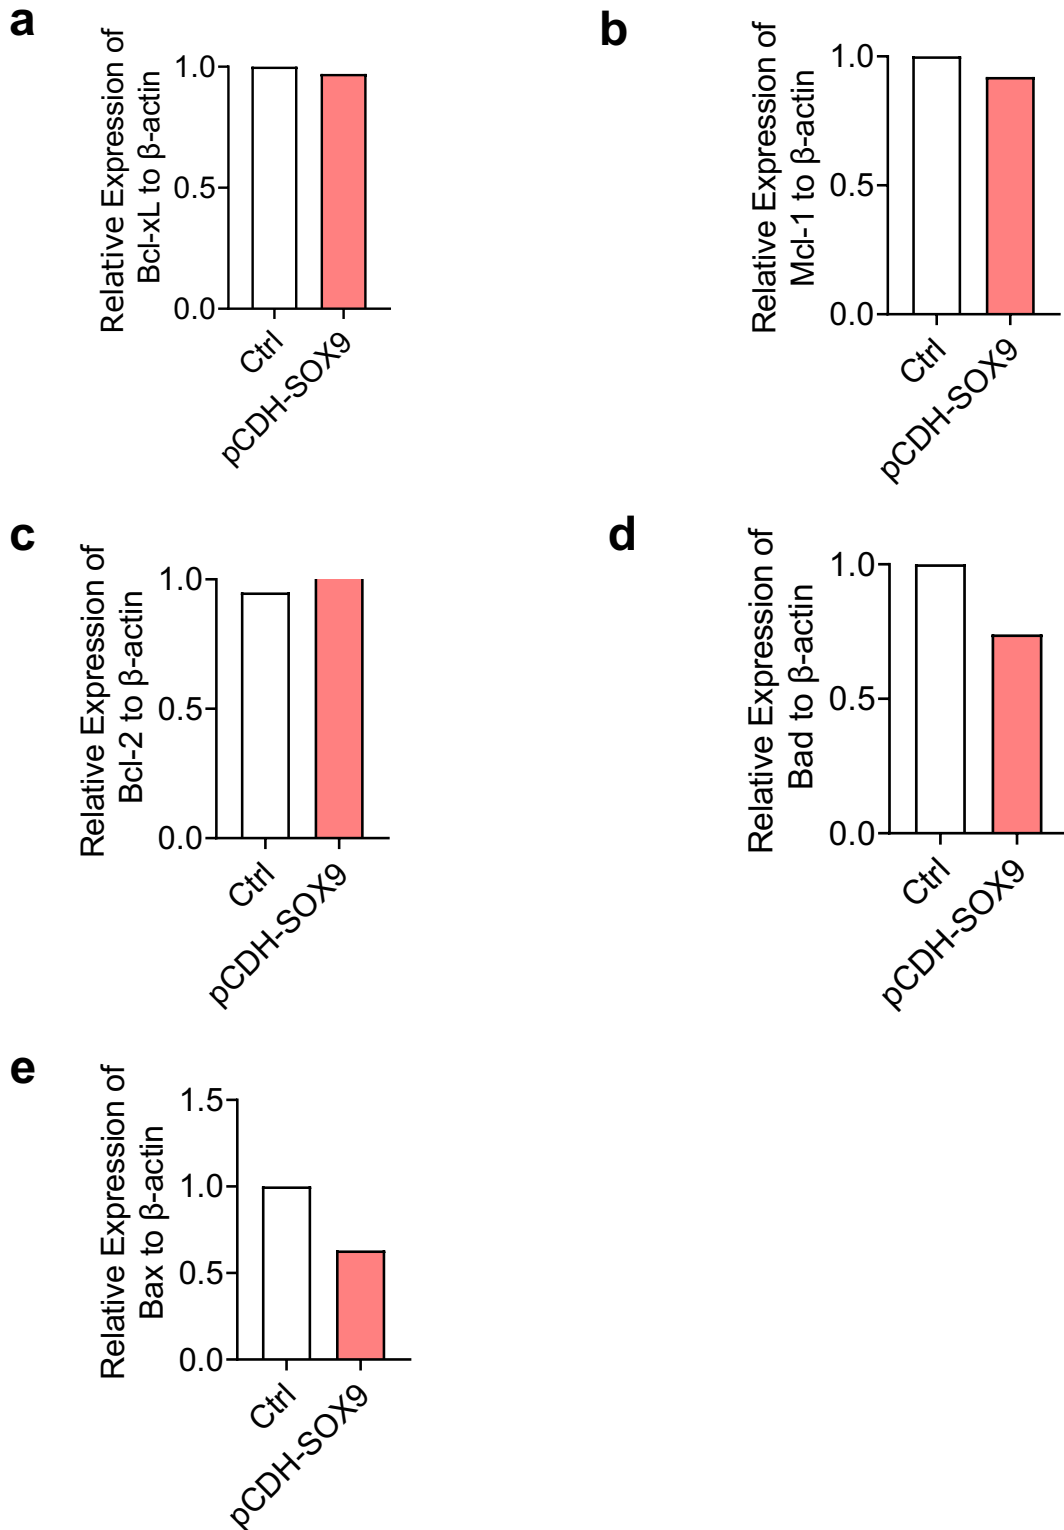

**Supplemental Figure 9. Densitometry quantitation of Supply. Figure 1f.** Immunoblotting assay of Bcl-xL, Bcl-2, Mcl-1, Bad and Bax protein expressions was performed as described previously. Bands intensities were measure using Image J software and relative expressions of (a) Bcl-xL (b) Mcl-1 (c) Bcl-2 (d) Bad and (e) Bax were determined in lentiviral encoding pCDH-SOX9 overexpressing OCI-LY1 cells. Vector control transduced cells were denoted as 1.



| # Patients numbers | DX name                          | Location                  | Age | Gender | GCB vs non-GCB | Cytogenetics /FISH                         | SOX9     | Prior lymphoma history                                     |
|--------------------|----------------------------------|---------------------------|-----|--------|----------------|--------------------------------------------|----------|------------------------------------------------------------|
| 1                  | DLBCL                            |                           | 68  | M      | GCB            | NA                                         | POS (+)  | FL , Grade 2 (1997)                                        |
| 2                  | DLBCL                            | left axillary LN          | 38  | M      | GCB            | No CG, but PCR showed IGH-BCL2             |          | FL, grade 1-2 (2001)                                       |
| 3                  | DLBCL                            | left lower lobe, lung     | 60  | M      | non-GCB        | NA                                         |          |                                                            |
| 4                  | DLBCL                            | left pterional mass       | 74  | F      | non-GCB        | NA                                         |          |                                                            |
| 5                  | DLBCL                            | right posterior mass      | 86  | F      | non-GCB        | FISH NEG                                   |          |                                                            |
| 6                  | DLBCL                            | left neck mass            | 59  | F      | GCB            | FISH NEG                                   |          |                                                            |
| 7                  | DLBCL                            | right posterior LN        | 45  | F      | GCB            | FISH NEG                                   |          |                                                            |
| 8                  | DLBCL                            | right neck mass           | 65  | F      | GCB            | FISH NEG                                   |          |                                                            |
| 9                  | DLBCL                            | small bowel               | 50  | M      | non-GCB        | FISH NEG                                   |          |                                                            |
| 10                 | DLBCL                            | right parapharyngeal mass | 77  | M      | non-GCB        | FISH NEG                                   |          |                                                            |
| 11                 | DLBCL                            | mesenteric LN             | 57  | M      | GCB            | FISH NEG                                   |          |                                                            |
| 12                 | DLBCL                            | spleen                    | 70  | F      | non-GCB        | NA                                         |          |                                                            |
| 13                 | DLBCL + FL (<5%)                 | spleen                    | 60  | F      | GCB            | No CG, but PCR showed IGH-BCL2             |          | FL, grade 2 with focal grade 3a (2008) -a couple of months |
| 14                 | DLBCL                            | right upper cervical LN   | 68  | F      | GCB            | FISH NEG                                   |          |                                                            |
| 15 (=16)           | DLBCL                            |                           |     |        |                | NA                                         |          |                                                            |
| 16                 | DLBCL                            | right testis and cord     | 90  | M      | GCB            | NA                                         |          |                                                            |
| 17                 | DLBCL                            | left inguinal LN          | 71  | M      | non-GCB        | NA                                         |          |                                                            |
| 18                 | DLBCL + FL grade 3B              | left axillary LN          | 46  | F      | GCB            | NA                                         |          |                                                            |
| 19                 | DLBCL                            | right breast mass         | 66  | F      | non-GCB        | FISH negative                              |          |                                                            |
| 20                 | DLBCL                            | left axillary LN          | 45  | M      | non-GCB        | complex;FISH negative                      |          |                                                            |
| 21                 | DLBCL, CD5+                      | left cervical LN          | 62  | M      |                | NA                                         |          |                                                            |
| 22                 | DLBCL                            | abdomen LN                | 61  | F      | non-GCB        | NA                                         |          |                                                            |
| 23                 | DLBCL                            | spleen                    | 69  | M      | GCB            | complex; FISH IGH-BCL6                     |          |                                                            |
| 24                 | primary DLBCL of the CNS         | left frontal tumor        | 64  | F      | non-GCB        | NA                                         |          |                                                            |
| 25                 | DLBCL                            | terminal ileum            | 49  | F      | GCB            | Complex; FISH negative                     |          |                                                            |
| 26                 | DLBCL                            | right testis and cord     | 65  | M      | non-GCB        | FISH NEG                                   |          |                                                            |
| 27                 | DLBCL (80%) + FL 3B (20%)        | left groin LN             | 73  | M      | GCB            | NA                                         |          |                                                            |
| 28                 | DLBCL                            | left flank mss            | 68  | M      | GCB            | NA                                         |          | FL, grade 1-2 (2002)                                       |
| 29                 | DLBCL                            | right tonsil              | 23  | M      | non-GCB        | FISH NEG                                   |          |                                                            |
| 30                 | DLBCL                            | spleen                    | 71  | M      | non-GCB        | FISH NEG                                   |          |                                                            |
| 31                 | DLBCL                            | right facial LN           | 56  | M      | non-GCB        | complex                                    |          |                                                            |
| 32                 | DLBCL                            | right deep jugular LN     | 76  | F      | non-GCB        | complex; IGL-BCL6; five copies of BCL2     |          |                                                            |
| 33                 | DLBCL                            | left axillary mass        | 69  | M      | non-GCB        | complex; IGH-BCL6                          |          |                                                            |
| 34                 | DLBCL                            | right upper lobe, lung    | 67  | F      | GCB            | complex; IGH-BCL6+; 4X MYC                 |          |                                                            |
| 35                 | DLBCL                            | thyroid isthmus mass      | 70  | F      | non-GCB        | normal karyotype; NEG BCL2 and MYC         |          |                                                            |
| 36 (=53)           | DLBCL                            | abdominal wall mass       | 64  | M      |                | FISH NEG                                   |          | FL starting 1995                                           |
| 37                 | EBV+ DLBCL, age-related          |                           | 80  | M      | non-GCB        | FISH NEG                                   | POS (++) |                                                            |
| 38                 | DLBCL                            | right adrenal mass        | 88  | M      | GCB            | FISH NEG                                   |          |                                                            |
| 39                 | DLBCL (anaplastic morphology)    | right thigh mass          | 70  | F      | non-GCB        | FISH NEG                                   |          |                                                            |
| 40                 | DLBCL                            | left thyroid              | 72  | F      | non-GCB        | FISH NEG                                   |          | DLBCL (2009)                                               |
| 41                 | DLBCL, EBV+, age/induran-related | left adrenal gland        | 82  | M      | non-GCB        | NA                                         |          |                                                            |
| 42                 | DLBCL and FL grade 3B (<%)       | right groin LN            | 71  | F      | GCB            | FISH NEG                                   |          |                                                            |
| 43                 | DLBCL (Richter's)                | Left upper cervical LN    | 88  | M      |                | complex                                    |          | CLL/SLL                                                    |
| 44                 | DLBCL                            | Left inguinal LN          | 39  | F      | GCB            | complex with t (14;18)                     |          | FL (2010)                                                  |
| 45                 | DLBCL                            | right inguinal mass       | 45  | F      | GCB            | FISH: IGH-BCL2                             | POS (+)  | FL, Gr 2 (1998)                                            |
| 46                 | DLBCL                            | Left inguinal LN          | 66  | F      | GCB            | complex; FISH BCL6 (62.5%); IGH-BCL2 (68%) |          |                                                            |
| 47                 | DLBCL                            | right inguinal LN         | 50  | M      | GCB            | complex: IGH-BCL2 (37%); 3-4 copies BCL6   | POS (++) |                                                            |
| 48                 | DLBCL                            | Abdominal LN              | 74  | F      | non-GCB        | FISH: BCL6 rearranged                      |          |                                                            |
| 49                 | DLBCL                            | Right submandibular mass  | 76  | M      | non-GCB        | FISH: BCL6 rearranged                      |          |                                                            |
| 50                 | DLBCL                            | Left Cervical LN          | 50  | F      | GCB            | NA                                         | POS (+)  | DLBCL (2004), FL grade 2 (relapse post transplant, 2006)   |
| 51                 | DLBCL                            | Left inguinal LN          | 47  | M      | GCB            | loss of Y, del(1)(p34), tetraploidy        |          |                                                            |
| 52                 | DLBCL                            | AP window LN              | 69  | F      | GCB            | complex: FISH IGH-BCL6                     |          |                                                            |
| 53                 | DLBCL                            | Abdominal mass            | 64  | M      | GCB            | complex: FISH MYC rearranged               |          | FL starting 1995; DLBCL (#36)                              |
| 54                 | DLBCL (Richter's)                | Lower back mass           | 65  | M      | non-GCB        | FISH: trisomy 12, IGH-BCL6                 |          | CLL (10 years ago), DLBCL in 2009                          |
| 55                 | primary DLBCL of the CNS         | Brain tumor               | 84  | F      | non-GCB        | FISH NEG                                   |          |                                                            |
| 56                 | DLBCL (Richter's)                | left axillary LN          | 75  | F      |                | complex (suboptimal)                       |          |                                                            |
| 57                 | DLBCL (PTLD, monomorphic)        | small intestine           | 52  | M      | GCB            | MLL amp                                    | POS (++) |                                                            |
| 58                 | DLBCL                            | right laryngeal mass      | 80  | F      | non-GCB        | complex                                    |          |                                                            |
| 59                 | DLBCL                            | right neck mass           | 73  | F      | non-GCB        | suboptimal FISH                            |          |                                                            |
| 60                 | DLBCL (Richter's)                | Left axillary LN          | 75  | M      |                | del(10)(q22q26) del(13)(q12q14)            |          | CLL/SLL (2005)                                             |
| 61                 | DLBCL                            | right breast              | 81  | F      | non-GCB        | FISH NEG                                   |          | DLBCL, in breast (2000)                                    |
| 62                 | DLBCL                            | left deep jugular LN      | 55  | M      | non-GCB        | complex; IGH-BCL6                          |          |                                                            |
| 63                 | DLBCL                            | spleen                    | 78  | M      | non-GCB        | complex                                    |          | history of grade 3a FL                                     |
| 64                 | DLBCL                            | right parotid mass        | 48  | M      | GCB            | FISH NEG                                   |          |                                                            |
| 65                 | DLBCL                            | right upper abdomen mass  | 63  | F      | non-GCB        | complex                                    |          | EBV+ DLBCL with BM involvement (2010)                      |
| 66                 | DLBCL                            | spleen                    | 71  | M      | non-GCB        | complex:FISH 3 copies BCL6                 |          |                                                            |

|     |                               |                                |    |   |         |                                                                 |           |                                               |
|-----|-------------------------------|--------------------------------|----|---|---------|-----------------------------------------------------------------|-----------|-----------------------------------------------|
| 67  | DLBCL                         | right facial cutaneous mass    | 66 | M | GCB     | complex:FISH IGH-BCL2                                           |           | FL, grade 2/3 (2011)                          |
| 68  | DLBCL                         | lateral pelvic mass            | 46 | F | non-GCB | complex: FISH 3-5 copies MYC                                    |           |                                               |
| 69  | DLBCL                         | Left axillary LN               | 72 | F | GCB     | complex: FISH IGH-BCL2 (22%); BCL6 (19%)                        |           | FL, grade 2 (2006)                            |
| 70  | primary DLBCL of the CNS      | right frontal brain tumor      | 46 | M | GCB     | FISH IGH-BCL6                                                   |           |                                               |
| 71  | PMLBCL                        | Mediastinal mass               | 45 | F | non-GCB | NA                                                              |           |                                               |
| 72  | DLBCL (anaplastic morphology) | Left neck LN                   | 70 | M | non-GCB | Complex; FISH 3 copies BCL6, MYC and BCL2                       |           |                                               |
| 73  | DLBCL                         | Left anterior neck mass        | 85 | F | GCB     | NA                                                              |           |                                               |
| 74  | DLBCL                         | Right neck level II LN         | 29 | M | non-GCB | FISH NEG                                                        |           |                                               |
| 75  | DLBCL                         | Tonsil                         | 69 | M | GCB     | complex; FISH MYC rearranged (8%), 6 copies of BCL2             |           |                                               |
| 76  | DLBCL                         | Right Deep Cervical LN         | 89 | M | GCB     | complex with t(14;18); FISH IGH rearranged (22%)                |           |                                               |
| 77  | DLBCL                         | left deep cervical lymphoma    | 64 | M | GCB     | complex with 3-way IGH-BCL2, BCL6-IGH translocation             |           | FL (2001)                                     |
| 78  | DLBCL                         | Left inguinal LN               | 45 | M | GCB     | complex: FISH IGH-BCL2 (31%)                                    | POS (++)  | FL, Gr I (2006)                               |
| 79  | DLBCL                         | right neck level 2 LN          | 55 | M | GCB     | complex with t(14;18)                                           |           | B-NHL (DLBCL?) (2011)                         |
| 80  | DLBCL                         | right chest wall mass          | 64 | F | GCB     | FISH NEG                                                        |           | diffuse follicular lymphoma, grade 1-2 (2011) |
| 81  | DLBCL (80%) + FL 3B (20%)     | submental LN                   | 43 | M | non-GCB | FISH 3 copies of BCL6 and BCL2                                  |           |                                               |
| 82  | DLBCL and FL grade 3B         | Left Cervical LN               | 74 | M | GCB     | t(14;18) [8/15]                                                 | POS (++)  |                                               |
| 83  | DLBCL (anaplastic morphology) | left Level 4 cervical LN       | 74 | M | non-GCB | FISH MYC rearranged, extra copies of BCL6 and BCL2              |           |                                               |
| 84  | DLBCL                         | Left inguinal LN               | 21 | M | GCB     | FISH NEG                                                        |           |                                               |
| 85  | DLBCL                         | Right cervical LN              | 75 | F | GCB     | NA                                                              |           |                                               |
| 86  | DLBCL                         | Right level 4 Cervical LN      | 45 | F | GCB     | Complex: FISH extra copies of BCL6 and BCL2                     |           |                                               |
| 87  | DLBCL, EBV+, age-related      | Right Deep Cervical LN         | 69 | F | non-GCB | trisomy 15                                                      |           |                                               |
| 88  | DLBCL                         | Right Deep Cervical LN         | 66 | F | GCB     | complex: FISH IGH-BCL2 (98%)                                    | POS (+)   | DLBCL (2012)                                  |
| 89  | DLBCL                         | Left neck mass                 | 42 | M | non-GCB | FISH IGH-BCL6,                                                  |           |                                               |
| 90  | DLBCL                         | right cervical LN              | 46 | M | GCB     | complex: FISH IGH-BCL2 (40%)                                    | POS (++)  |                                               |
| 91  | primary DLBCL of the CNS      | Right Parietal Brain tumor     | 69 | F | non-GCB | NA                                                              |           |                                               |
| 92  | DLBCL                         | Right groin LN                 | 44 | M | GCB     | Complex; IGH-BCL6; 3 copies of MYC in small subset              |           |                                               |
| 93  | DLBCL                         | Occipital Scalp Mass           | 82 | F | GCB     | Complex; FISH 3 copies BCL6                                     |           |                                               |
| 94  | primary DLBCL of the CNS      | Right frontal tumor            | 90 | M | non-GCB | FISH NEG                                                        |           |                                               |
| 95  | DLBCL                         | Left inguinal LN               | 85 | F | non-GCB | NA                                                              |           |                                               |
| 96  | DLBCL                         | L5 epidura                     | 65 | M | GCB     | NA                                                              |           |                                               |
| 97  | DLBCL                         | Mediastinal LN                 | 71 | M | GCB     | Extra copies of BCL6 and MYC (near tetraploidy)                 |           |                                               |
| 98  | DLBCL                         | Left Cervical LN               | 53 | M | non-GCB | Complex                                                         |           |                                               |
| 99  | DLBCL                         | Right neck LN                  | 52 | M | non-GCB | FISH IGH-BCL6, extra copies of BCL2                             |           |                                               |
| 100 | DLBCL                         | Pre-Tracheal LN                | 73 | F | non-GCB | IGH-BCL2 (65%), BCL6 (22.5%)                                    |           | FL, grade 1 (2003)                            |
| 101 | DLBCL (anaplastic morphology) | Left inguinal LN               | 67 | M | non-GCB | IGH-BCL2 (12%), BCL6 (2.5%), MYC (2%)                           |           |                                               |
| 102 | DLBCL                         | Parotid mass                   | 60 | F | GCB     | IGH-BCL6 (90%); IGH-BCL2 (90%)                                  |           | History of FL (by EPIC)                       |
| 103 | DLBCL                         | Left neck LN                   | 91 | M | non-GCB | FISH IGH-BCL6, extra copies of BCL2                             |           |                                               |
| 104 | DLBCL                         | right groin mass               | 50 | M | non-GCB | complex                                                         |           |                                               |
| 105 | DLBCL                         | left supraclavicular LN        | 71 | F | non-GCB | normal karyotype; trisomy 15 (FISH)                             |           | EBV+ PTLD, polymorphic (2013)                 |
| 106 | DLBCL                         | right groin LN                 | 64 | F | GCB     | complex; IGH-BCL2 (variant)                                     |           |                                               |
| 107 | DLBCL                         | Left axillary LN               | 55 | F | non-GCB | complex                                                         |           |                                               |
| 108 | DLBCL                         | splenic hilar LN               | 67 | F | GCB     | complex; IGH-BCL6; deletion of MYC and TP53; BCL2 amplification |           |                                               |
| 109 | DLBCL                         | right arm mass                 | 55 | M | GCB     | complex: FISH IGH-BCL2 (98%)                                    | POS (+++) | DLBCL (60%), FL 3B (40%) (2013); EPIC history |
| 110 | DLBCL                         | right neck node                | 68 | M | GCB     | complex                                                         |           |                                               |
| 111 | DLBCL                         | right neck mass                | 72 | F | non-GCB | complex; 4X BCL6, 5X BCL2                                       |           |                                               |
| 112 | High grade B-cell lymphoma    | right nasal mass               | 83 | F |         | extra copy of BCL2                                              |           |                                               |
| 113 | primary DLBCL of the CNS      | Right cerebellar tumor         | 33 | M | GCB     | FISH NEG                                                        |           |                                               |
| 114 | DLBCL                         | suboccipital subcutaneous mass | 62 | M | GCB     | FISH NEG                                                        |           |                                               |

**Supplemental Table 1: Clinical information of 114 DLBCL primary cases.** M: Male; F: Female; GCB: Germinal Center B cells; FISH: Fluorescence In Situ Hybridization; FL: Follicular Lymphoma; POS: positivity of SOX9 staining

## Supplemental Table 2: Primer sequences

| <b>shRNA targeting sequences</b> |          |                             |
|----------------------------------|----------|-----------------------------|
| Targeted Gene                    | Oligo #  | Targeting Sequence (5'->3') |
| SOX9                             | shSOX9#1 | tgaagatgaccgacgagcaggagaa   |
| SOX9                             | shSOX9#2 | gagaccttcgatgtcaacgagtttg   |

  

| <b>Primers used for ChIP to amplify the DHCR24 promoter</b> |                         |                            |
|-------------------------------------------------------------|-------------------------|----------------------------|
| Name                                                        | Sense sequence (5'->3') | Antiense sequence (5'->3') |
| SOX9(-599/-348)                                             | ctgggctgctccaagtga      | ttaagcggtttgcagtgcc        |
| SOX9(-636/-452)                                             | aatggcctctggagttcacg    | aaacctcgcgattggctcggg      |
| SOX9(-251/-78)                                              | attcgagcggaccccaccggca  | cgctcgcgattggctcggg        |

  

| <b>Primers of DHCR24 for promoter luciferase</b> |                                  |                               |
|--------------------------------------------------|----------------------------------|-------------------------------|
| Name                                             | Sense sequence (5'->3')          | Antiense sequence (5'->3')    |
| DHCR24                                           | cccgtaccctggtatgcatgttagcttcta   | tttctcgggggtcggcgccgcgcggttaa |
| Full length                                      | aact                             |                               |
| DHCR24 mutant                                    | tttctgggctgctccaagtgtactgttaggag | gcagtggggagtggtgagctcctaacag  |
|                                                  | ctcaccactcccact                  | tacacttgaagcagcccagaaa        |

  

| <b>Primer sequences used for real-time PCR</b> |                         |                            |
|------------------------------------------------|-------------------------|----------------------------|
| Name                                           | Sense sequence (5'->3') | Antiense sequence (5'->3') |
| SOX9                                           | ttgagcctaaaacggtgct     | ctggtgttctgagaggcaca       |
| GAPDH                                          | gagtcaacggatttggtcgt    | ttgattttggagggatctcg       |
| DHCR24                                         | tgtgcctgagcttgatgac     | gaccagggtacggcatagaa       |
| CYP51A1                                        | gctcagttgtccctgcttc     | aaaattagccaggcatggtg       |
| FDFT1                                          | ataaccaatgcactgcacca    | cctttccgaatcttactgc        |
| NSDHL                                          | ctcagccagtcactccttc     | ctgcctgcttcaagaaatcc       |
| MSMO1                                          | actctgtctcctggctgga     | catcgtgaaaccccatctct       |

**Significant association**

| Variable                 |         | Total     | SOX9      |           | P value (Neg vs Pos) |
|--------------------------|---------|-----------|-----------|-----------|----------------------|
|                          |         |           | Neg       | Pos       |                      |
| IGH_BCL2 - no. (%)       | Neg     | 73 (78.5) | 71 (84.5) | 2 (22.2)  | <.001                |
|                          | Pos     | 20 (21.5) | 13 (15.5) | 7 (77.8)  |                      |
| Stage- no. (%)           | 1       | 23 (23.0) | 23 (25.0) | 0 (0.0)   | 0.011                |
|                          | 2       | 27 (27.0) | 27 (29.3) | 0 (0.0)   |                      |
|                          | 3+4     | 50 (50.0) | 42 (45.7) | 8 (100)   |                      |
| GCB_vs_non_GCB - no. (%) | GCB     | 54 (50.5) | 44 (45.8) | 10 (90.9) | 0.008                |
|                          | non-GCB | 53 (49.5) | 52 (54.2) | 1 (9.1)   |                      |

**No significant association**

| Parameter              | P value (SOX9 <sup>+</sup> vs SOX9 <sup>-</sup> ) |
|------------------------|---------------------------------------------------|
| Sex                    | 0.34                                              |
| AGE_at_dx              | 0.447                                             |
| ECOG_performance       | 0.632                                             |
| IPI                    | 0.873                                             |
| LDH2                   | 0.343                                             |
| EOT_response           | 0.448                                             |
| Relapse                | 1                                                 |
| FL_History             | 0.112                                             |
| Overall survival       | 0.66                                              |
| Relapsed free survival | 0.98                                              |

**Supplemental Table 3:** Statistical analysis of the association of various clinic-pathologic parameters with SOX9 expression.

## Supplemental Table 4: peaking calling file

# This file is generated by MACS version 1.4.2 20120305  
# ARGUMENTS LIST:  
# name = Ka-IP\_vs\_Ka-Input\_1e-3\_10\_30  
# format = BAM  
# ChIP-seq file = Ka-IP\_sequence\_bowtie2\_hg19\_alignment.bam  
# control file = Ka-Input\_sequence\_bowtie2\_hg19\_alignment.bam  
# effective genome size = 2.70e+09  
# band width = 300  
# model fold = 10,30  
# pvalue cutoff = 1.00e-03  
# Large dataset will be scaled towards smaller dataset.  
# Range for calculating regional lambda is: 1000 bps and 10000 bps

# tag size is determined as 149 bps  
# total tags in treatment: 25801980  
# tags after filtering in treatment: 24823035  
# maximum duplicate tags at the same position in treatment = 3  
# Redundant rate in treatment: 0.04  
# total tags in control: 23223297  
# tags after filtering in control: 22511333  
# maximum duplicate tags at the same position in control = 3  
# Redundant rate in control: 0.03  
# d = 292

| chr  | start    | end      | length | summit | tags | #NAME? | fold_enrich | FDR(%) |
|------|----------|----------|--------|--------|------|--------|-------------|--------|
| chr1 | 9845     | 10549    | 705    | 333    | 229  | 373.29 | 6.95        | 25     |
| chr1 | 672470   | 674920   | 2451   | 1962   | 57   | 73.9   | 6.85        | 58.54  |
| chr1 | 751772   | 752600   | 829    | 563    | 19   | 35.05  | 6.57        | 47.49  |
| chr1 | 1333405  | 1335116  | 1712   | 1049   | 42   | 37.34  | 3.71        | 46.83  |
| chr1 | 4066505  | 4068176  | 1672   | 1088   | 44   | 35.48  | 5.27        | 47.44  |
| chr1 | 4964254  | 4965344  | 1091   | 518    | 24   | 36.94  | 4.93        | 46.9   |
| chr1 | 5664718  | 5665783  | 1066   | 550    | 21   | 30.4   | 4.93        | 51.46  |
| chr1 | 6051028  | 6051935  | 908    | 631    | 23   | 39.03  | 4.95        | 46.23  |
| chr1 | 6504552  | 6505444  | 893    | 653    | 19   | 31.38  | 5.34        | 50.16  |
| chr1 | 7827803  | 7828677  | 875    | 251    | 25   | 49.44  | 4.87        | 51.79  |
| chr1 | 8445652  | 8447039  | 1388   | 647    | 29   | 31.88  | 5.35        | 49.82  |
| chr1 | 8475437  | 8476545  | 1109   | 530    | 24   | 33.55  | 6.3         | 48.54  |
| chr1 | 9196992  | 9197836  | 845    | 430    | 19   | 34.09  | 4.93        | 48.17  |
| chr1 | 9553453  | 9554349  | 897    | 263    | 20   | 34.33  | 4.83        | 47.81  |
| chr1 | 9623284  | 9624551  | 1268   | 687    | 32   | 37.64  | 4.89        | 45.88  |
| chr1 | 10545938 | 10546843 | 906    | 623    | 21   | 34.93  | 4.19        | 47.64  |
| chr1 | 10618929 | 10619825 | 897    | 634    | 20   | 35.33  | 4.93        | 47.42  |
| chr1 | 10635797 | 10636704 | 908    | 636    | 20   | 31.36  | 4.62        | 50.21  |
| chr1 | 10753585 | 10754339 | 755    | 467    | 22   | 45.28  | 5.71        | 49.28  |
| chr1 | 11193910 | 11194749 | 840    | 557    | 20   | 31.87  | 5.39        | 49.75  |
| chr1 | 11230471 | 11231343 | 873    | 284    | 20   | 36.77  | 4.52        | 46.92  |
| chr1 | 11315837 | 11316779 | 943    | 366    | 27   | 48.03  | 5.53        | 49.09  |
| chr1 | 11967490 | 11969038 | 1549   | 739    | 42   | 32.9   | 3.91        | 49.34  |
| chr1 | 12166650 | 12167999 | 1350   | 716    | 26   | 31.98  | 4.52        | 49.83  |
| chr1 | 12925018 | 12925994 | 977    | 595    | 20   | 30.96  | 5.34        | 50.47  |
| chr1 | 14573824 | 14574640 | 817    | 548    | 18   | 31.45  | 5.34        | 50     |
| chr1 | 14672699 | 14673921 | 1223   | 704    | 28   | 40.82  | 7.23        | 46.35  |

|      |          |          |      |      |    |       |      |       |
|------|----------|----------|------|------|----|-------|------|-------|
| chr1 | 15952640 | 15954253 | 1614 | 367  | 32 | 38.45 | 4.33 | 46.37 |
| chr1 | 17028153 | 17031828 | 3676 | 534  | 83 | 39.93 | 3.69 | 46.72 |
| chr1 | 17353993 | 17354506 | 514  | 257  | 16 | 34.23 | 4.98 | 47.91 |
| chr1 | 17600541 | 17601426 | 886  | 521  | 19 | 31.76 | 4.11 | 49.79 |
| chr1 | 19115873 | 19117150 | 1278 | 658  | 26 | 35.25 | 5.75 | 47.32 |
| chr1 | 19483862 | 19484611 | 750  | 264  | 17 | 31.07 | 4.52 | 50.77 |
| chr1 | 21158591 | 21160856 | 2266 | 1169 | 45 | 46.45 | 3.08 | 48.38 |
| chr1 | 21303958 | 21305332 | 1375 | 909  | 31 | 40.14 | 3.97 | 46.73 |
| chr1 | 21612965 | 21614428 | 1464 | 893  | 34 | 32.02 | 4.67 | 49.78 |
| chr1 | 23044051 | 23044825 | 775  | 443  | 19 | 38.51 | 6.16 | 46.29 |
| chr1 | 23075349 | 23076314 | 966  | 528  | 21 | 35.6  | 4.93 | 47.23 |
| chr1 | 24496698 | 24497666 | 969  | 264  | 24 | 44.14 | 4.93 | 48.04 |
| chr1 | 25072480 | 25073729 | 1250 | 541  | 34 | 30.37 | 4.93 | 51.61 |
| chr1 | 25084625 | 25085937 | 1313 | 598  | 32 | 35.79 | 5.24 | 47.11 |
| chr1 | 26080631 | 26081412 | 782  | 527  | 18 | 33.52 | 4.93 | 48.58 |
| chr1 | 26161464 | 26162160 | 697  | 345  | 19 | 44.19 | 6.16 | 48.06 |
| chr1 | 27055592 | 27056619 | 1028 | 750  | 28 | 36.65 | 5.11 | 46.96 |
| chr1 | 27086822 | 27088730 | 1909 | 1330 | 41 | 32.72 | 3.74 | 49.37 |
| chr1 | 27089134 | 27090370 | 1237 | 550  | 26 | 37.26 | 6.57 | 46.54 |
| chr1 | 27092280 | 27093218 | 939  | 425  | 21 | 33.02 | 5.33 | 49.13 |
| chr1 | 27107281 | 27108189 | 909  | 259  | 21 | 35.36 | 5.39 | 47.49 |
| chr1 | 27720473 | 27721907 | 1435 | 753  | 34 | 32.77 | 4.63 | 49.43 |
| chr1 | 28487566 | 28488798 | 1233 | 752  | 27 | 37.17 | 4.62 | 46.91 |
| chr1 | 28765405 | 28766269 | 865  | 266  | 20 | 33.25 | 4.19 | 48.93 |
| chr1 | 29411164 | 29412244 | 1081 | 591  | 24 | 37.49 | 6.98 | 46.03 |
| chr1 | 30187444 | 30188174 | 731  | 439  | 17 | 32.22 | 5.34 | 49.98 |
| chr1 | 30265545 | 30266826 | 1282 | 638  | 26 | 35.06 | 4.52 | 47.42 |
| chr1 | 30814646 | 30815589 | 944  | 257  | 21 | 36.86 | 5.34 | 46.73 |
| chr1 | 31029565 | 31030687 | 1123 | 537  | 23 | 31.43 | 6.16 | 50.07 |
| chr1 | 34094659 | 34095331 | 673  | 438  | 16 | 31.05 | 4.48 | 50.58 |
| chr1 | 34562533 | 34563828 | 1296 | 640  | 30 | 50.37 | 6.98 | 51.92 |
| chr1 | 35497769 | 35499253 | 1485 | 776  | 40 | 51.09 | 4.67 | 51.85 |
| chr1 | 35638112 | 35639714 | 1603 | 727  | 44 | 39.08 | 3.42 | 46.32 |
| chr1 | 35970949 | 35973764 | 2816 | 1315 | 60 | 31.16 | 4.82 | 50.55 |
| chr1 | 36246961 | 36247828 | 868  | 274  | 20 | 37.07 | 4.93 | 46.91 |
| chr1 | 36806871 | 36807749 | 879  | 652  | 19 | 32.14 | 4.93 | 49.88 |
| chr1 | 36875118 | 36875781 | 664  | 250  | 16 | 31.12 | 4.83 | 50.71 |
| chr1 | 36997909 | 36998943 | 1035 | 686  | 21 | 31.93 | 4.93 | 49.77 |
| chr1 | 37116174 | 37116884 | 711  | 223  | 17 | 30.04 | 6.09 | 51.46 |
| chr1 | 38204651 | 38205500 | 850  | 462  | 20 | 38.2  | 4.93 | 46.37 |
| chr1 | 38405327 | 38406155 | 829  | 272  | 20 | 30.09 | 5.82 | 51.54 |
| chr1 | 38503473 | 38504400 | 928  | 346  | 20 | 33.57 | 4.52 | 48.57 |
| chr1 | 38988426 | 38989665 | 1240 | 602  | 25 | 33.34 | 5.75 | 48.7  |
| chr1 | 39293256 | 39293868 | 613  | 273  | 15 | 30.66 | 5.75 | 51.05 |
| chr1 | 39338960 | 39340238 | 1279 | 271  | 40 | 42.85 | 4.16 | 47.31 |
| chr1 | 39609840 | 39610494 | 655  | 387  | 16 | 32.54 | 5.75 | 49.34 |
| chr1 | 39764868 | 39765888 | 1021 | 568  | 23 | 32.44 | 4.57 | 49.55 |
| chr1 | 40637022 | 40638923 | 1902 | 556  | 42 | 31.76 | 4.15 | 49.86 |
| chr1 | 40656728 | 40658261 | 1534 | 342  | 34 | 30.09 | 3.49 | 51.54 |
| chr1 | 40960983 | 40961975 | 993  | 599  | 25 | 47.15 | 6.16 | 47.45 |
| chr1 | 42336215 | 42337324 | 1110 | 442  | 26 | 32.8  | 5.14 | 49.44 |
| chr1 | 42527174 | 42528442 | 1269 | 723  | 25 | 32.01 | 6.57 | 49.77 |

|      |          |          |      |      |    |       |      |       |
|------|----------|----------|------|------|----|-------|------|-------|
| chr1 | 42927344 | 42928354 | 1011 | 612  | 24 | 36.93 | 4.95 | 46.87 |
| chr1 | 43086932 | 43088760 | 1829 | 778  | 44 | 70.06 | 5.75 | 53.39 |
| chr1 | 43238545 | 43239557 | 1013 | 313  | 21 | 30.25 | 5.45 | 51.69 |
| chr1 | 43848207 | 43849214 | 1008 | 365  | 21 | 33.32 | 5.34 | 48.74 |
| chr1 | 44146333 | 44147730 | 1398 | 738  | 28 | 32.14 | 4.95 | 49.82 |
| chr1 | 44172287 | 44174463 | 2177 | 968  | 54 | 53.24 | 5.6  | 51.61 |
| chr1 | 44225873 | 44226777 | 905  | 422  | 21 | 32.68 | 5.46 | 49.36 |
| chr1 | 44538819 | 44540759 | 1941 | 707  | 39 | 48.29 | 6.16 | 49.5  |
| chr1 | 44723706 | 44724560 | 855  | 583  | 19 | 33.51 | 4.93 | 48.65 |
| chr1 | 45159690 | 45160578 | 889  | 534  | 20 | 31.31 | 5.27 | 50.33 |
| chr1 | 45451672 | 45453078 | 1407 | 820  | 32 | 31.66 | 4.67 | 49.87 |
| chr1 | 45546899 | 45547967 | 1069 | 412  | 21 | 30.26 | 4.93 | 51.61 |
| chr1 | 46206234 | 46207365 | 1132 | 577  | 29 | 30.68 | 4.28 | 50.99 |
| chr1 | 46531327 | 46532582 | 1256 | 435  | 31 | 30.34 | 4.57 | 51.6  |
| chr1 | 46768049 | 46770856 | 2808 | 795  | 67 | 43.67 | 4.4  | 47.91 |
| chr1 | 46843313 | 46844180 | 868  | 507  | 20 | 37.07 | 5.34 | 46.91 |
| chr1 | 47439411 | 47440592 | 1182 | 702  | 28 | 48.58 | 6.57 | 49.74 |
| chr1 | 47963721 | 47965638 | 1918 | 533  | 37 | 45.75 | 6.16 | 49.96 |
| chr1 | 48542168 | 48543036 | 869  | 537  | 19 | 32.71 | 4.93 | 49.41 |
| chr1 | 49803914 | 49804854 | 941  | 566  | 20 | 32.86 | 5.75 | 49.3  |
| chr1 | 50351395 | 50352464 | 1070 | 546  | 21 | 30.21 | 4.93 | 51.72 |
| chr1 | 50549766 | 50550888 | 1123 | 590  | 23 | 30.41 | 5.64 | 51.47 |
| chr1 | 51272689 | 51274610 | 1922 | 352  | 49 | 61.3  | 4.52 | 54.72 |
| chr1 | 51384622 | 51385943 | 1322 | 746  | 31 | 35.19 | 5.17 | 47.14 |
| chr1 | 51509195 | 51510718 | 1524 | 1031 | 36 | 51.48 | 5.33 | 51.71 |
| chr1 | 51954091 | 51955325 | 1235 | 772  | 31 | 37.99 | 5.97 | 46.45 |
| chr1 | 52239033 | 52240237 | 1205 | 913  | 30 | 34.37 | 3.98 | 47.83 |
| chr1 | 52262782 | 52264347 | 1566 | 1177 | 31 | 37.14 | 5.51 | 46.96 |
| chr1 | 52726680 | 52728213 | 1534 | 205  | 32 | 45.47 | 4.11 | 49.89 |
| chr1 | 52873185 | 52874556 | 1372 | 1091 | 32 | 31.54 | 3.94 | 49.92 |
| chr1 | 53694376 | 53695694 | 1319 | 767  | 29 | 39.49 | 4.95 | 46.98 |
| chr1 | 53917200 | 53917862 | 663  | 276  | 18 | 37.85 | 6.09 | 46.8  |
| chr1 | 53939263 | 53939979 | 717  | 464  | 18 | 37.76 | 4.93 | 46.71 |
| chr1 | 54327276 | 54330226 | 2951 | 626  | 74 | 61.25 | 4.57 | 55.08 |
| chr1 | 55352422 | 55353509 | 1088 | 800  | 28 | 33.03 | 5.41 | 49.15 |
| chr1 | 55852890 | 55853956 | 1067 | 358  | 25 | 41.26 | 5.24 | 46.91 |
| chr1 | 56568390 | 56569263 | 874  | 408  | 21 | 41.2  | 6.98 | 46.62 |
| chr1 | 56763450 | 56764522 | 1073 | 479  | 21 | 30.07 | 4.93 | 51.46 |
| chr1 | 56793287 | 56794281 | 995  | 470  | 21 | 34.01 | 5.75 | 48.54 |
| chr1 | 57883443 | 57885315 | 1873 | 1278 | 42 | 30.1  | 4.85 | 51.56 |
| chr1 | 58949429 | 58951256 | 1828 | 579  | 37 | 30.51 | 4.36 | 51.29 |
| chr1 | 58994331 | 58995806 | 1476 | 997  | 31 | 31.7  | 3.77 | 49.78 |
| chr1 | 59013746 | 59014679 | 934  | 288  | 21 | 31.59 | 4.42 | 49.99 |
| chr1 | 59119748 | 59121149 | 1402 | 783  | 29 | 35.39 | 5.71 | 47.61 |
| chr1 | 59212292 | 59213149 | 858  | 622  | 22 | 42.26 | 5.75 | 47.24 |
| chr1 | 59394489 | 59395070 | 582  | 291  | 15 | 32.66 | 6.16 | 49.32 |
| chr1 | 59750915 | 59751601 | 687  | 417  | 17 | 35.07 | 6.16 | 47.35 |
| chr1 | 60548297 | 60549313 | 1017 | 355  | 21 | 32.85 | 5.34 | 49.36 |
| chr1 | 61015722 | 61017559 | 1838 | 289  | 39 | 43.98 | 5.18 | 47.89 |
| chr1 | 61655732 | 61656668 | 937  | 474  | 21 | 37.27 | 5.34 | 46.57 |
| chr1 | 61660084 | 61661376 | 1293 | 551  | 30 | 37.27 | 6.16 | 46.55 |
| chr1 | 61767067 | 61768341 | 1275 | 509  | 28 | 43.21 | 5.75 | 47.6  |

|      |          |          |      |      |    |       |      |       |
|------|----------|----------|------|------|----|-------|------|-------|
| chr1 | 61837134 | 61838701 | 1568 | 964  | 34 | 47.62 | 4.52 | 49.12 |
| chr1 | 62511814 | 62512704 | 891  | 508  | 19 | 31.48 | 5.34 | 49.85 |
| chr1 | 62551989 | 62552822 | 834  | 375  | 18 | 30.49 | 5.75 | 51.26 |
| chr1 | 62612292 | 62613239 | 948  | 663  | 20 | 32.48 | 4.93 | 49.47 |
| chr1 | 62768441 | 62769204 | 764  | 475  | 17 | 30.24 | 5.34 | 51.77 |
| chr1 | 63443585 | 63444591 | 1007 | 732  | 22 | 33.37 | 4.52 | 48.68 |
| chr1 | 63649181 | 63650126 | 946  | 255  | 20 | 32.59 | 6.57 | 49.31 |
| chr1 | 63984660 | 63985930 | 1271 | 773  | 30 | 40.59 | 4.59 | 46.73 |
| chr1 | 64096584 | 64097330 | 747  | 530  | 17 | 31.25 | 4.11 | 50.49 |
| chr1 | 65306495 | 65307727 | 1233 | 637  | 27 | 40.15 | 7.25 | 46.7  |
| chr1 | 66142187 | 66144160 | 1974 | 478  | 46 | 70.01 | 4.93 | 52.5  |
| chr1 | 66509336 | 66510252 | 917  | 657  | 21 | 38.48 | 4.93 | 46.32 |
| chr1 | 66659911 | 66661309 | 1399 | 672  | 28 | 36.95 | 6.16 | 46.95 |
| chr1 | 66701774 | 66702669 | 896  | 623  | 22 | 32.1  | 4.64 | 49.74 |
| chr1 | 67135672 | 67136651 | 980  | 349  | 21 | 34.82 | 5.34 | 47.49 |
| chr1 | 67172103 | 67173271 | 1169 | 621  | 24 | 32.98 | 6.16 | 49.22 |
| chr1 | 67428291 | 67429918 | 1628 | 1255 | 34 | 44.63 | 4.52 | 48.94 |
| chr1 | 67564271 | 67565422 | 1152 | 833  | 26 | 31.8  | 4.19 | 49.82 |
| chr1 | 67655655 | 67656631 | 977  | 480  | 21 | 34.99 | 6.16 | 47.61 |
| chr1 | 67762413 | 67763080 | 668  | 393  | 20 | 51.95 | 6.57 | 51.11 |
| chr1 | 67777675 | 67779170 | 1496 | 319  | 32 | 47.44 | 4.11 | 48.51 |
| chr1 | 67854752 | 67856018 | 1267 | 519  | 29 | 47.81 | 5.75 | 49.34 |
| chr1 | 68207072 | 68209091 | 2020 | 1334 | 37 | 44.78 | 5.34 | 48.95 |
| chr1 | 68214305 | 68215130 | 826  | 469  | 20 | 39.75 | 6.16 | 46.7  |
| chr1 | 69383772 | 69384611 | 840  | 580  | 18 | 30.16 | 5.34 | 51.72 |
| chr1 | 69491985 | 69492937 | 953  | 663  | 20 | 32.21 | 4.93 | 49.97 |
| chr1 | 69587157 | 69588023 | 867  | 409  | 21 | 41.66 | 4.93 | 47.25 |
| chr1 | 69798973 | 69799578 | 606  | 282  | 17 | 40.15 | 5.24 | 46.69 |
| chr1 | 69816409 | 69817412 | 1004 | 351  | 26 | 48.93 | 5.97 | 50.32 |
| chr1 | 69949224 | 69950361 | 1138 | 571  | 25 | 37.28 | 5.64 | 46.71 |
| chr1 | 69958295 | 69959363 | 1069 | 592  | 22 | 30.26 | 5.75 | 51.61 |
| chr1 | 70055452 | 70057053 | 1602 | 1166 | 31 | 38.54 | 5.34 | 46.26 |
| chr1 | 70577414 | 70579483 | 2070 | 612  | 41 | 49.6  | 6.98 | 51.17 |
| chr1 | 70598977 | 70600529 | 1553 | 241  | 32 | 31.43 | 3.08 | 50.08 |
| chr1 | 70603214 | 70604180 | 967  | 263  | 27 | 58.72 | 6.16 | 52.69 |
| chr1 | 70653210 | 70654032 | 823  | 314  | 20 | 36.43 | 4.62 | 47.18 |
| chr1 | 71018958 | 71019885 | 928  | 345  | 24 | 46.88 | 6.98 | 47.48 |
| chr1 | 71484278 | 71485066 | 789  | 516  | 19 | 37.58 | 5.34 | 45.92 |
| chr1 | 72028286 | 72029014 | 729  | 452  | 17 | 32.34 | 5.75 | 49.9  |
| chr1 | 72159874 | 72160637 | 764  | 473  | 17 | 30.24 | 4.93 | 51.77 |
| chr1 | 72531604 | 72532280 | 677  | 389  | 16 | 31.11 | 5.34 | 50.68 |
| chr1 | 72676773 | 72677972 | 1200 | 801  | 24 | 31.52 | 4.93 | 49.89 |
| chr1 | 73045541 | 73046361 | 821  | 532  | 20 | 40.09 | 6.57 | 46.58 |
| chr1 | 73387706 | 73388381 | 676  | 290  | 17 | 35.83 | 5.34 | 47.03 |
| chr1 | 73515637 | 73516449 | 813  | 442  | 18 | 31.68 | 4.93 | 49.84 |
| chr1 | 73724476 | 73725162 | 687  | 425  | 16 | 30.49 | 4.93 | 51.31 |
| chr1 | 73908890 | 73909726 | 837  | 460  | 18 | 30.33 | 5.34 | 51.59 |
| chr1 | 74214498 | 74215626 | 1129 | 719  | 23 | 31.15 | 4.93 | 50.63 |
| chr1 | 74303597 | 74304425 | 829  | 406  | 18 | 30.77 | 4.52 | 50.95 |
| chr1 | 74347883 | 74348698 | 816  | 547  | 18 | 31.51 | 5.34 | 49.84 |
| chr1 | 74383614 | 74384413 | 800  | 488  | 21 | 46.38 | 6.16 | 48.4  |
| chr1 | 74535912 | 74536619 | 708  | 437  | 18 | 33.05 | 5.89 | 49.15 |



|      |          |          |      |      |    |       |      |       |
|------|----------|----------|------|------|----|-------|------|-------|
| chr1 | 74803091 | 74804838 | 1748 | 504  | 38 | 31.08 | 4.05 | 50.74 |
| chr1 | 75354335 | 75355846 | 1512 | 1178 | 39 | 69.3  | 5.58 | 55.2  |
| chr1 | 75488373 | 75489340 | 968  | 677  | 20 | 31.43 | 5.34 | 50.12 |
| chr1 | 75611313 | 75611904 | 592  | 238  | 16 | 37.04 | 5.75 | 47.01 |
| chr1 | 75775018 | 75775814 | 797  | 512  | 18 | 32.61 | 4.52 | 49.4  |
| chr1 | 75913281 | 75914358 | 1078 | 419  | 24 | 37.65 | 5.34 | 45.98 |
| chr1 | 76109440 | 76110468 | 1029 | 492  | 24 | 40.44 | 4.52 | 46.93 |
| chr1 | 76313219 | 76314268 | 1050 | 451  | 23 | 35.1  | 4.52 | 47.39 |
| chr1 | 76451291 | 76452115 | 825  | 452  | 19 | 35.3  | 5.75 | 47.33 |
| chr1 | 76929663 | 76931632 | 1970 | 599  | 43 | 36.77 | 4.89 | 46.97 |
| chr1 | 76977772 | 76978801 | 1030 | 768  | 22 | 31.79 | 4.89 | 49.79 |
| chr1 | 77092715 | 77093818 | 1104 | 434  | 24 | 36.25 | 6.16 | 46.93 |
| chr1 | 77355443 | 77357022 | 1580 | 519  | 32 | 30.29 | 3.77 | 51.67 |
| chr1 | 77444296 | 77445628 | 1333 | 431  | 28 | 40.16 | 4.93 | 46.7  |
| chr1 | 77545234 | 77546422 | 1189 | 548  | 25 | 35.81 | 7.39 | 47.14 |
| chr1 | 77941472 | 77942209 | 738  | 282  | 18 | 33.7  | 5.06 | 48.61 |
| chr1 | 77979589 | 77980491 | 903  | 239  | 21 | 39.34 | 4.93 | 46.61 |
| chr1 | 78367821 | 78368773 | 953  | 347  | 20 | 32.21 | 4.93 | 49.97 |
| chr1 | 78399027 | 78400007 | 981  | 607  | 21 | 34.77 | 4.52 | 47.62 |
| chr1 | 78641220 | 78642282 | 1063 | 601  | 22 | 30.55 | 4.52 | 51.18 |
| chr1 | 78801677 | 78802713 | 1037 | 656  | 21 | 31.83 | 5.34 | 49.81 |
| chr1 | 79457747 | 79459120 | 1374 | 639  | 32 | 54.32 | 7.39 | 54.65 |
| chr1 | 79537180 | 79538446 | 1267 | 713  | 29 | 47.81 | 5.75 | 49.34 |
| chr1 | 79552458 | 79553242 | 785  | 300  | 19 | 37.84 | 5.34 | 46.76 |
| chr1 | 79566317 | 79567339 | 1023 | 733  | 26 | 49.78 | 6.98 | 52.16 |
| chr1 | 79589003 | 79589746 | 744  | 273  | 18 | 32.25 | 5.33 | 50.01 |
| chr1 | 79724189 | 79726170 | 1982 | 1298 | 40 | 43.18 | 4.95 | 47.47 |
| chr1 | 79756255 | 79756897 | 643  | 282  | 17 | 38.21 | 6.57 | 46.35 |
| chr1 | 80299824 | 80300934 | 1111 | 646  | 26 | 39.21 | 8.37 | 46.34 |
| chr1 | 80470298 | 80470974 | 677  | 282  | 16 | 31.11 | 6.16 | 50.68 |
| chr1 | 80578088 | 80579014 | 927  | 336  | 22 | 37.87 | 4.52 | 46.67 |
| chr1 | 81084840 | 81085724 | 885  | 425  | 20 | 36.04 | 5.34 | 46.89 |
| chr1 | 81167830 | 81168914 | 1085 | 281  | 27 | 50.26 | 6.16 | 51.64 |
| chr1 | 81216387 | 81217013 | 627  | 283  | 18 | 44.25 | 6.93 | 48.38 |
| chr1 | 81425299 | 81426210 | 912  | 646  | 21 | 38.78 | 4.93 | 46.06 |
| chr1 | 81492042 | 81493006 | 965  | 286  | 20 | 31.58 | 4.93 | 50    |
| chr1 | 81505064 | 81506049 | 986  | 534  | 22 | 30.48 | 4.95 | 51.28 |
| chr1 | 81756228 | 81757278 | 1051 | 375  | 23 | 35.05 | 5.34 | 47.54 |
| chr1 | 81864674 | 81865477 | 804  | 220  | 19 | 36.61 | 4.52 | 46.97 |
| chr1 | 82126666 | 82127747 | 1082 | 462  | 23 | 33.44 | 4.93 | 48.62 |
| chr1 | 82647415 | 82648380 | 966  | 525  | 21 | 35.6  | 5.34 | 47.23 |
| chr1 | 82999621 | 83000373 | 753  | 514  | 17 | 30.89 | 5.75 | 50.71 |
| chr1 | 83121652 | 83122444 | 793  | 355  | 18 | 32.85 | 5.34 | 49.28 |
| chr1 | 83139901 | 83140756 | 856  | 583  | 20 | 37.82 | 5.34 | 46.66 |
| chr1 | 83319161 | 83319997 | 837  | 247  | 19 | 34.57 | 5.34 | 47.74 |
| chr1 | 83394737 | 83395717 | 981  | 731  | 21 | 34.77 | 4.93 | 47.62 |
| chr1 | 83547571 | 83548953 | 1383 | 553  | 30 | 45.45 | 4.11 | 49.71 |
| chr1 | 83746636 | 83747535 | 900  | 598  | 21 | 39.53 | 4.52 | 46.86 |
| chr1 | 84055571 | 84057039 | 1469 | 1257 | 34 | 38.59 | 4.11 | 46.13 |
| chr1 | 84259042 | 84260213 | 1172 | 573  | 28 | 49.2  | 6.57 | 50.89 |
| chr1 | 84370489 | 84371772 | 1284 | 736  | 26 | 34.97 | 5.75 | 47.59 |
| chr1 | 84526036 | 84526959 | 924  | 282  | 23 | 42.51 | 4.93 | 47.28 |

|      |          |          |      |      |     |       |      |       |
|------|----------|----------|------|------|-----|-------|------|-------|
| chr1 | 84594958 | 84595914 | 957  | 334  | 21  | 36.11 | 4.93 | 46.95 |
| chr1 | 84643686 | 84644955 | 1270 | 649  | 28  | 36.84 | 5.96 | 46.87 |
| chr1 | 84654138 | 84655078 | 941  | 672  | 23  | 31.16 | 4.11 | 50.57 |
| chr1 | 84687711 | 84689122 | 1412 | 639  | 31  | 42.15 | 8.37 | 47.02 |
| chr1 | 84707660 | 84710129 | 2470 | 592  | 56  | 79.18 | 6.16 | 60.34 |
| chr1 | 85039759 | 85041720 | 1962 | 1467 | 46  | 32.61 | 4.2  | 49.39 |
| chr1 | 85073957 | 85075145 | 1189 | 251  | 28  | 48.15 | 4.52 | 49.46 |
| chr1 | 85203673 | 85204650 | 978  | 496  | 21  | 34.93 | 4.93 | 47.58 |
| chr1 | 85620685 | 85621519 | 835  | 290  | 18  | 30.19 | 6.13 | 51.69 |
| chr1 | 86370566 | 86371531 | 966  | 728  | 24  | 33.48 | 4.45 | 48.67 |
| chr1 | 86793733 | 86795701 | 1969 | 592  | 34  | 30.71 | 5.75 | 50.99 |
| chr1 | 87081328 | 87083157 | 1830 | 595  | 38  | 39.66 | 5.1  | 46.51 |
| chr1 | 87435569 | 87437211 | 1643 | 935  | 39  | 53.52 | 4.79 | 52.01 |
| chr1 | 87510324 | 87511598 | 1275 | 695  | 28  | 31.33 | 4.79 | 50.27 |
| chr1 | 87783407 | 87784228 | 822  | 253  | 19  | 35.48 | 4.93 | 47.39 |
| chr1 | 88035499 | 88036399 | 901  | 369  | 21  | 39.47 | 6.57 | 47    |
| chr1 | 88191015 | 88191980 | 966  | 279  | 21  | 35.6  | 5.34 | 47.23 |
| chr1 | 88625236 | 88625897 | 662  | 389  | 16  | 32.08 | 5.34 | 49.79 |
| chr1 | 88655715 | 88656594 | 880  | 621  | 19  | 32.09 | 5.34 | 49.72 |
| chr1 | 88744824 | 88745693 | 870  | 267  | 19  | 30.58 | 4.33 | 51.22 |
| chr1 | 88940564 | 88941474 | 911  | 243  | 20  | 34.53 | 4.52 | 47.68 |
| chr1 | 89002642 | 89003625 | 984  | 505  | 23  | 32.08 | 5.83 | 49.71 |
| chr1 | 89416393 | 89417941 | 1549 | 971  | 34  | 36.93 | 4.94 | 46.86 |
| chr1 | 89482333 | 89484028 | 1696 | 1156 | 34  | 40.89 | 5.3  | 46.38 |
| chr1 | 89484457 | 89485306 | 850  | 277  | 20  | 35.93 | 5.9  | 47.05 |
| chr1 | 89527895 | 89529494 | 1600 | 1193 | 34  | 46    | 5.75 | 49.61 |
| chr1 | 90140275 | 90141311 | 1037 | 676  | 25  | 33.16 | 6.51 | 49.13 |
| chr1 | 90150770 | 90151544 | 775  | 530  | 19  | 38.51 | 4.52 | 46.29 |
| chr1 | 90171148 | 90171993 | 846  | 606  | 19  | 34.03 | 4.52 | 48.53 |
| chr1 | 90370633 | 90372315 | 1683 | 1020 | 39  | 30.23 | 4.28 | 51.74 |
| chr1 | 90412477 | 90413343 | 867  | 424  | 24  | 41.65 | 5.3  | 47.14 |
| chr1 | 90443860 | 90445033 | 1174 | 711  | 25  | 36.57 | 7.8  | 46.87 |
| chr1 | 90465987 | 90467130 | 1144 | 631  | 29  | 44.97 | 6.78 | 48.85 |
| chr1 | 90496984 | 90499282 | 2299 | 1605 | 49  | 64.57 | 7.8  | 54.5  |
| chr1 | 91770893 | 91771848 | 956  | 670  | 21  | 36.17 | 4.93 | 46.95 |
| chr1 | 91852454 | 91853255 | 802  | 487  | 247 | 54.6  | 4.08 | 54    |
| chr1 | 91989345 | 91990354 | 1010 | 272  | 24  | 32.12 | 4.19 | 49.74 |
| chr1 | 92235411 | 92236358 | 948  | 688  | 21  | 36.63 | 4.11 | 46.89 |
| chr1 | 92319674 | 92320453 | 780  | 379  | 18  | 33.64 | 5.75 | 48.75 |
| chr1 | 92574938 | 92575678 | 741  | 472  | 17  | 31.61 | 4.52 | 49.92 |
| chr1 | 92578716 | 92579491 | 776  | 285  | 18  | 33.89 | 5.34 | 48.57 |
| chr1 | 92603157 | 92604292 | 1136 | 761  | 24  | 34.6  | 6.57 | 47.74 |
| chr1 | 92664578 | 92665268 | 691  | 407  | 16  | 30.24 | 5.34 | 51.75 |
| chr1 | 92829258 | 92829877 | 620  | 291  | 17  | 33.78 | 5.77 | 48.68 |
| chr1 | 93038360 | 93040305 | 1946 | 621  | 44  | 55.46 | 5.33 | 53.43 |
| chr1 | 93099304 | 93100318 | 1015 | 729  | 23  | 34.62 | 6.69 | 47.81 |
| chr1 | 93365335 | 93366319 | 985  | 456  | 21  | 30.53 | 5.33 | 51.27 |
| chr1 | 93587102 | 93588020 | 919  | 405  | 20  | 30.21 | 4.57 | 51.75 |
| chr1 | 93790216 | 93791062 | 847  | 405  | 19  | 33.98 | 4.52 | 48.64 |
| chr1 | 93810227 | 93812245 | 2019 | 559  | 39  | 41.59 | 5.33 | 47.25 |
| chr1 | 94080177 | 94080937 | 761  | 492  | 18  | 34.83 | 6.16 | 47.51 |
| chr1 | 94184687 | 94185555 | 869  | 247  | 20  | 37.01 | 4.52 | 46.95 |

|      |           |           |      |      |    |       |      |       |
|------|-----------|-----------|------|------|----|-------|------|-------|
| chr1 | 94673642  | 94674443  | 802  | 289  | 18 | 32.32 | 6.16 | 50.01 |
| chr1 | 94768519  | 94769333  | 815  | 264  | 19 | 35.92 | 5.75 | 47.05 |
| chr1 | 94872060  | 94872989  | 930  | 587  | 21 | 37.69 | 5.75 | 46.43 |
| chr1 | 94885700  | 94887048  | 1349 | 553  | 30 | 30.62 | 5.82 | 51.18 |
| chr1 | 95574425  | 95575701  | 1277 | 615  | 30 | 51.51 | 5.75 | 51.79 |
| chr1 | 95724818  | 95725801  | 984  | 601  | 22 | 34.6  | 4.52 | 47.68 |
| chr1 | 96222623  | 96223963  | 1341 | 719  | 27 | 35.99 | 5.75 | 47.07 |
| chr1 | 96238255  | 96239573  | 1319 | 728  | 30 | 49.02 | 5.75 | 50.55 |
| chr1 | 96427964  | 96428726  | 763  | 272  | 17 | 30.3  | 4.52 | 51.54 |
| chr1 | 96749391  | 96749991  | 601  | 233  | 15 | 31.47 | 5.75 | 49.96 |
| chr1 | 97552308  | 97553511  | 1204 | 514  | 24 | 31.34 | 5.34 | 50.18 |
| chr1 | 97565690  | 97567101  | 1412 | 463  | 35 | 60.77 | 6.57 | 55.22 |
| chr1 | 97913854  | 97914716  | 863  | 283  | 19 | 33.05 | 4.11 | 49.1  |
| chr1 | 98146661  | 98147812  | 1152 | 694  | 25 | 37.71 | 5.34 | 46.54 |
| chr1 | 98276471  | 98278553  | 2083 | 1793 | 53 | 58.3  | 4.67 | 54.18 |
| chr1 | 98307425  | 98309373  | 1949 | 619  | 44 | 36.64 | 4.05 | 47.02 |
| chr1 | 98547362  | 98549022  | 1661 | 401  | 35 | 46.79 | 5.75 | 47.25 |
| chr1 | 98549473  | 98550332  | 860  | 266  | 19 | 33.22 | 4.93 | 49.11 |
| chr1 | 98662000  | 98662847  | 848  | 590  | 19 | 33.92 | 4.52 | 48.7  |
| chr1 | 98779364  | 98780148  | 785  | 514  | 19 | 33.95 | 6.47 | 48.67 |
| chr1 | 100066593 | 100068236 | 1644 | 1145 | 34 | 35.67 | 4.42 | 47.21 |
| chr1 | 100384985 | 100386937 | 1953 | 1462 | 40 | 47.91 | 4.95 | 49.14 |
| chr1 | 100387645 | 100388395 | 751  | 198  | 20 | 42.03 | 4.67 | 47.04 |
| chr1 | 100731637 | 100733247 | 1611 | 1080 | 38 | 30.69 | 4    | 51.03 |
| chr1 | 100873712 | 100874486 | 775  | 500  | 20 | 36.16 | 4.69 | 46.97 |
| chr1 | 100928777 | 100930218 | 1442 | 705  | 33 | 33.8  | 4.94 | 48.82 |
| chr1 | 101013239 | 101014491 | 1253 | 783  | 26 | 32.52 | 5    | 49.4  |
| chr1 | 101060911 | 101062025 | 1115 | 546  | 23 | 31.81 | 6.16 | 49.81 |
| chr1 | 101225763 | 101226596 | 834  | 434  | 18 | 30.19 | 5.3  | 51.69 |
| chr1 | 101389859 | 101390831 | 973  | 220  | 26 | 34.98 | 4.36 | 47.56 |
| chr1 | 101455380 | 101456299 | 920  | 684  | 20 | 33.63 | 4.48 | 48.77 |
| chr1 | 101581927 | 101583358 | 1432 | 647  | 32 | 30.49 | 4.36 | 51.29 |
| chr1 | 101615206 | 101616905 | 1700 | 1246 | 40 | 57.31 | 4.95 | 53.89 |
| chr1 | 102028895 | 102030134 | 1240 | 727  | 29 | 41.5  | 7    | 47.12 |
| chr1 | 102155763 | 102156687 | 925  | 519  | 20 | 33.74 | 4.93 | 48.66 |
| chr1 | 102208859 | 102210185 | 1327 | 680  | 29 | 43.9  | 5.71 | 47.73 |
| chr1 | 103052202 | 103053295 | 1094 | 724  | 26 | 33.66 | 4.11 | 48.65 |
| chr1 | 103697694 | 103698415 | 722  | 413  | 17 | 32.78 | 4.11 | 49.39 |
| chr1 | 104198367 | 104199673 | 1307 | 615  | 30 | 36.53 | 4.45 | 46.91 |
| chr1 | 104218169 | 104221090 | 2922 | 540  | 62 | 46.4  | 5.12 | 48.47 |
| chr1 | 104362993 | 104364507 | 1515 | 863  | 33 | 46.44 | 4.93 | 48.42 |
| chr1 | 105237717 | 105238630 | 914  | 281  | 20 | 34.35 | 4.52 | 47.87 |
| chr1 | 105265717 | 105266692 | 976  | 699  | 21 | 35.04 | 5.75 | 47.48 |
| chr1 | 105310365 | 105311130 | 766  | 489  | 17 | 30.13 | 4.52 | 51.65 |
| chr1 | 105594664 | 105595604 | 941  | 655  | 20 | 32.86 | 6.98 | 49.3  |
| chr1 | 105739879 | 105740754 | 876  | 285  | 19 | 32.31 | 4.52 | 50.09 |
| chr1 | 106184367 | 106185237 | 871  | 418  | 20 | 32.9  | 4.57 | 49.33 |
| chr1 | 106193012 | 106193835 | 824  | 440  | 18 | 31.05 | 5.34 | 50.62 |
| chr1 | 106561040 | 106561817 | 778  | 490  | 18 | 33.76 | 4.11 | 48.7  |
| chr1 | 107573976 | 107575178 | 1203 | 570  | 24 | 31.39 | 5.34 | 50.21 |
| chr1 | 107745414 | 107746164 | 751  | 280  | 17 | 31.01 | 5.34 | 50.5  |
| chr1 | 107875664 | 107876407 | 744  | 396  | 20 | 45.62 | 5.75 | 50.19 |

|      |           |           |      |      |    |       |      |       |
|------|-----------|-----------|------|------|----|-------|------|-------|
| chr1 | 108330579 | 108331771 | 1193 | 592  | 24 | 31.85 | 6.16 | 49.77 |
| chr1 | 108461752 | 108462631 | 880  | 279  | 20 | 32.38 | 4.57 | 49.74 |
| chr1 | 108647826 | 108649226 | 1401 | 784  | 31 | 35.2  | 4.45 | 47.18 |
| chr1 | 108725657 | 108727610 | 1954 | 644  | 40 | 33.74 | 4.02 | 48.64 |
| chr1 | 108742861 | 108744726 | 1866 | 581  | 39 | 31.77 | 5.49 | 49.86 |
| chr1 | 109083325 | 109084176 | 852  | 285  | 21 | 39.57 | 5.45 | 46.67 |
| chr1 | 109212320 | 109213205 | 886  | 317  | 19 | 31.76 | 4.52 | 49.79 |
| chr1 | 109333866 | 109335405 | 1540 | 1271 | 35 | 31.51 | 4.05 | 49.88 |
| chr1 | 109632734 | 109633981 | 1248 | 696  | 30 | 47.42 | 5.71 | 48.38 |
| chr1 | 109641915 | 109643683 | 1769 | 1130 | 39 | 34.42 | 4.76 | 47.81 |
| chr1 | 110129176 | 110130085 | 910  | 279  | 19 | 30.47 | 4.11 | 51.26 |
| chr1 | 110296131 | 110296846 | 716  | 260  | 17 | 33.16 | 5.75 | 49.13 |
| chr1 | 110658327 | 110658827 | 501  | 250  | 15 | 34.17 | 5.14 | 48.01 |
| chr1 | 111227982 | 111228888 | 907  | 281  | 20 | 34.75 | 6.16 | 47.62 |
| chr1 | 111238754 | 111239642 | 889  | 617  | 23 | 44.85 | 7.8  | 48.87 |
| chr1 | 111303348 | 111304151 | 804  | 554  | 22 | 38.53 | 5.77 | 46.23 |
| chr1 | 111549074 | 111550274 | 1201 | 459  | 27 | 31.59 | 4.79 | 50.01 |
| chr1 | 112101931 | 112102997 | 1067 | 809  | 28 | 47.53 | 5.12 | 48.63 |
| chr1 | 112182790 | 112183991 | 1202 | 522  | 27 | 33.38 | 4.24 | 48.7  |
| chr1 | 112893111 | 112894412 | 1302 | 816  | 32 | 58.85 | 5.75 | 52.76 |
| chr1 | 112943254 | 112945041 | 1788 | 543  | 43 | 59.09 | 5.65 | 53    |
| chr1 | 112945972 | 112946916 | 945  | 357  | 21 | 35.75 | 4.43 | 47.05 |
| chr1 | 113454737 | 113456243 | 1507 | 923  | 34 | 38.95 | 5.3  | 46.13 |
| chr1 | 113512999 | 113514476 | 1478 | 639  | 34 | 52.48 | 5.75 | 50.63 |
| chr1 | 114115277 | 114116246 | 970  | 707  | 21 | 33.1  | 4.72 | 49.2  |
| chr1 | 114204741 | 114205491 | 751  | 279  | 19 | 40.17 | 5.34 | 46.72 |
| chr1 | 114236412 | 114237234 | 823  | 233  | 23 | 49.64 | 5.34 | 51.23 |
| chr1 | 114262884 | 114263841 | 958  | 526  | 21 | 30.83 | 4.47 | 50.87 |
| chr1 | 114323476 | 114324508 | 1033 | 349  | 25 | 34.57 | 4.19 | 47.72 |
| chr1 | 114962636 | 114963536 | 901  | 349  | 23 | 36.97 | 5.46 | 46.97 |
| chr1 | 114976900 | 114978395 | 1496 | 685  | 34 | 31.16 | 4.4  | 50.56 |
| chr1 | 115014040 | 115015100 | 1061 | 394  | 27 | 35.03 | 5.12 | 47.46 |
| chr1 | 115146213 | 115147739 | 1527 | 337  | 32 | 45.83 | 5.34 | 49.92 |
| chr1 | 115577319 | 115578287 | 969  | 338  | 22 | 35.43 | 4.93 | 47.46 |
| chr1 | 115608576 | 115609478 | 903  | 284  | 19 | 30.84 | 6.16 | 50.85 |
| chr1 | 115856117 | 115856943 | 827  | 562  | 24 | 54.46 | 5.75 | 53.92 |
| chr1 | 116162838 | 116163784 | 947  | 568  | 21 | 36.69 | 5.34 | 46.9  |
| chr1 | 116345388 | 116346353 | 966  | 674  | 22 | 31.54 | 6.47 | 49.96 |
| chr1 | 116699099 | 116700139 | 1041 | 661  | 24 | 32.76 | 4.37 | 49.39 |
| chr1 | 116823227 | 116824463 | 1237 | 508  | 26 | 35.35 | 7.96 | 47.45 |
| chr1 | 116855857 | 116856698 | 842  | 275  | 19 | 30.53 | 3.81 | 51.26 |
| chr1 | 116945532 | 116946470 | 939  | 653  | 21 | 32.44 | 4.52 | 49.56 |
| chr1 | 116948206 | 116949380 | 1175 | 731  | 31 | 45.81 | 5.98 | 49.81 |
| chr1 | 117311925 | 117312748 | 824  | 372  | 18 | 31.05 | 5.34 | 50.62 |
| chr1 | 117860291 | 117861199 | 909  | 510  | 21 | 36.6  | 4.72 | 46.89 |
| chr1 | 118526853 | 118528014 | 1162 | 701  | 25 | 32.67 | 4.57 | 49.36 |
| chr1 | 118766061 | 118766651 | 591  | 279  | 17 | 38.59 | 5.71 | 46.15 |
| chr1 | 119300042 | 119300866 | 825  | 606  | 18 | 30.99 | 4.52 | 50.47 |
| chr1 | 119741384 | 119742114 | 731  | 453  | 17 | 32.22 | 6.16 | 49.98 |
| chr1 | 120386389 | 120387124 | 736  | 345  | 17 | 31.91 | 5.75 | 49.82 |
| chr1 | 120431393 | 120432305 | 913  | 479  | 19 | 30.31 | 6.57 | 51.54 |
| chr1 | 120458367 | 120459303 | 937  | 647  | 24 | 46.27 | 5.75 | 48.65 |

|      |           |           |      |      |     |       |      |       |
|------|-----------|-----------|------|------|-----|-------|------|-------|
| chr1 | 120495871 | 120496732 | 862  | 435  | 21  | 41.99 | 6.16 | 47.06 |
| chr1 | 121439015 | 121439876 | 862  | 596  | 21  | 37.66 | 6.85 | 46.08 |
| chr1 | 142569225 | 142576450 | 7226 | 1761 | 335 | 36.49 | 3.63 | 47.09 |
| chr1 | 142686638 | 142688193 | 1556 | 970  | 44  | 41.72 | 5.8  | 47.24 |
| chr1 | 143248157 | 143249664 | 1508 | 897  | 49  | 53.82 | 4.4  | 52.36 |
| chr1 | 143354844 | 143356550 | 1707 | 1293 | 37  | 41.12 | 4.33 | 46.35 |
| chr1 | 143509510 | 143511172 | 1663 | 490  | 73  | 53.81 | 4.98 | 52.25 |
| chr1 | 143516926 | 143520117 | 3192 | 1460 | 120 | 30.98 | 3.46 | 50.47 |
| chr1 | 144708125 | 144708928 | 804  | 456  | 21  | 46.08 | 6.57 | 49.26 |
| chr1 | 145394137 | 145395321 | 1185 | 416  | 32  | 40.01 | 4.13 | 46.51 |
| chr1 | 145397738 | 145398928 | 1191 | 725  | 29  | 30.71 | 4.21 | 50.99 |
| chr1 | 145505942 | 145507890 | 1949 | 284  | 50  | 39.93 | 3.75 | 46.7  |
| chr1 | 145653190 | 145654097 | 908  | 286  | 20  | 31.36 | 5.77 | 50.21 |
| chr1 | 147074802 | 147076346 | 1545 | 584  | 31  | 30.71 | 3.88 | 51.02 |
| chr1 | 147082919 | 147084498 | 1580 | 277  | 32  | 43.2  | 6.16 | 47.54 |
| chr1 | 147140889 | 147141728 | 840  | 272  | 20  | 32.53 | 4.37 | 49.39 |
| chr1 | 147816144 | 147816990 | 847  | 437  | 20  | 38.39 | 5.34 | 46.28 |
| chr1 | 147915800 | 147917929 | 2130 | 1578 | 39  | 37.12 | 5.33 | 46.94 |
| chr1 | 148186173 | 148187482 | 1310 | 572  | 30  | 31.3  | 4.76 | 50.33 |
| chr1 | 148240694 | 148243819 | 3126 | 1388 | 81  | 48.12 | 3.94 | 49.32 |
| chr1 | 149268367 | 149269884 | 1518 | 730  | 35  | 35.87 | 5.22 | 47.01 |
| chr1 | 149270552 | 149273367 | 2816 | 2013 | 67  | 33.62 | 4.53 | 48.72 |
| chr1 | 149293192 | 149295401 | 2210 | 1922 | 57  | 39.06 | 3.07 | 46.32 |
| chr1 | 149583820 | 149585362 | 1543 | 953  | 36  | 50.41 | 5.71 | 51.79 |
| chr1 | 149690586 | 149691761 | 1176 | 767  | 40  | 44.16 | 5.02 | 48.12 |
| chr1 | 149749896 | 149751035 | 1140 | 322  | 27  | 30.12 | 4.44 | 51.64 |
| chr1 | 149981858 | 149983313 | 1456 | 680  | 35  | 35.51 | 4.67 | 47.25 |
| chr1 | 150321166 | 150322280 | 1115 | 651  | 23  | 31.81 | 4.93 | 49.81 |
| chr1 | 150667450 | 150669699 | 2250 | 1692 | 57  | 31.5  | 3.61 | 49.86 |
| chr1 | 150914090 | 150914947 | 858  | 325  | 19  | 30.16 | 5.39 | 51.71 |
| chr1 | 151880805 | 151882906 | 2102 | 1395 | 54  | 39.27 | 4.74 | 46.4  |
| chr1 | 152997976 | 152999041 | 1066 | 545  | 23  | 34.26 | 5.34 | 47.89 |
| chr1 | 153452948 | 153453860 | 913  | 675  | 19  | 30.31 | 4.93 | 51.54 |
| chr1 | 153474036 | 153474784 | 749  | 484  | 17  | 31.13 | 4.93 | 50.63 |
| chr1 | 153710430 | 153711354 | 925  | 291  | 20  | 32.15 | 3.98 | 49.88 |
| chr1 | 153822935 | 153824454 | 1520 | 905  | 37  | 30.9  | 3.65 | 50.65 |
| chr1 | 154225720 | 154226676 | 957  | 604  | 20  | 32    | 4.52 | 49.74 |
| chr1 | 154229310 | 154230067 | 758  | 474  | 18  | 35.02 | 4.11 | 47.53 |
| chr1 | 154569720 | 154570762 | 1043 | 764  | 24  | 39.17 | 4.48 | 46.24 |
| chr1 | 154570783 | 154571639 | 857  | 576  | 19  | 31.31 | 4.72 | 50.32 |
| chr1 | 154580159 | 154581283 | 1125 | 338  | 34  | 33.56 | 3.67 | 48.59 |
| chr1 | 154894445 | 154895559 | 1115 | 530  | 23  | 31.81 | 4.11 | 49.81 |
| chr1 | 154944426 | 154945863 | 1438 | 875  | 35  | 30.24 | 4.85 | 51.74 |
| chr1 | 155056836 | 155058183 | 1348 | 707  | 42  | 38.69 | 5.02 | 46.22 |
| chr1 | 155195939 | 155197362 | 1424 | 806  | 36  | 32.69 | 4.49 | 49.39 |
| chr1 | 155374665 | 155375570 | 906  | 461  | 22  | 36.16 | 5.45 | 46.95 |
| chr1 | 155395213 | 155396475 | 1263 | 558  | 27  | 37.83 | 5.58 | 46.68 |
| chr1 | 155843079 | 155844321 | 1243 | 607  | 25  | 33.2  | 5.34 | 49.09 |
| chr1 | 156246119 | 156246911 | 793  | 233  | 19  | 31.32 | 4.37 | 50.33 |
| chr1 | 156560991 | 156562338 | 1348 | 579  | 28  | 35.86 | 5.45 | 46.97 |
| chr1 | 156701784 | 156703356 | 1573 | 1107 | 33  | 39.7  | 4.84 | 46.59 |
| chr1 | 157250144 | 157251977 | 1834 | 1281 | 35  | 38.97 | 5.34 | 46.12 |

|      |           |           |      |      |     |       |      |       |
|------|-----------|-----------|------|------|-----|-------|------|-------|
| chr1 | 157424568 | 157425328 | 761  | 447  | 17  | 30.42 | 4.93 | 51.28 |
| chr1 | 157438346 | 157439664 | 1319 | 609  | 28  | 40.88 | 6.16 | 46.34 |
| chr1 | 158066403 | 158067229 | 827  | 442  | 22  | 44.41 | 6.57 | 48.52 |
| chr1 | 158696927 | 158697884 | 958  | 255  | 20  | 31.95 | 4.11 | 49.8  |
| chr1 | 158792015 | 158792888 | 874  | 504  | 19  | 32.42 | 4.93 | 49.55 |
| chr1 | 159396051 | 159397777 | 1727 | 622  | 39  | 59.14 | 5.34 | 53.5  |
| chr1 | 160588556 | 160589556 | 1001 | 485  | 22  | 30.86 | 6.23 | 50.9  |
| chr1 | 160590295 | 160591157 | 863  | 600  | 19  | 30.42 | 3.89 | 51.34 |
| chr1 | 160633448 | 160634427 | 980  | 421  | 21  | 33.79 | 5.64 | 48.72 |
| chr1 | 160693486 | 160694377 | 892  | 368  | 21  | 34.01 | 4.05 | 48.55 |
| chr1 | 160816763 | 160817859 | 1097 | 754  | 23  | 30.41 | 5.12 | 51.4  |
| chr1 | 161651527 | 161656377 | 4851 | 1366 | 137 | 67.39 | 3.49 | 55.17 |
| chr1 | 161996651 | 161998678 | 2028 | 1473 | 56  | 33.93 | 3.88 | 48.75 |
| chr1 | 162363213 | 162365365 | 2153 | 1349 | 62  | 42.69 | 4.11 | 47.45 |
| chr1 | 162422611 | 162424489 | 1879 | 1170 | 46  | 38.72 | 4.89 | 46.26 |
| chr1 | 162461673 | 162464590 | 2918 | 818  | 67  | 34.63 | 4.21 | 47.78 |
| chr1 | 162924449 | 162925885 | 1437 | 773  | 33  | 50.65 | 6.57 | 51.45 |
| chr1 | 163203065 | 163204361 | 1297 | 520  | 31  | 54.68 | 4.93 | 54.03 |
| chr1 | 163384515 | 163385442 | 928  | 447  | 21  | 37.81 | 5.75 | 46.63 |
| chr1 | 163508442 | 163509670 | 1229 | 288  | 28  | 45.78 | 4.93 | 50    |
| chr1 | 163649423 | 163650086 | 664  | 226  | 17  | 36.68 | 4.93 | 46.98 |
| chr1 | 164498805 | 164499879 | 1075 | 558  | 23  | 33.8  | 6.16 | 48.84 |
| chr1 | 164553120 | 164554030 | 911  | 384  | 19  | 30.42 | 4.52 | 51.31 |
| chr1 | 165171126 | 165171918 | 793  | 563  | 19  | 37.32 | 4.11 | 46.71 |
| chr1 | 165417104 | 165417849 | 746  | 271  | 18  | 35.8  | 4.93 | 47.08 |
| chr1 | 165882648 | 165883668 | 1021 | 567  | 22  | 32.64 | 6.16 | 49.3  |
| chr1 | 165896467 | 165897409 | 943  | 581  | 21  | 36.92 | 4.93 | 46.83 |
| chr1 | 166506993 | 166508219 | 1227 | 548  | 30  | 40.93 | 4.79 | 46.44 |
| chr1 | 167036362 | 167037680 | 1319 | 655  | 28  | 40.88 | 5.75 | 46.34 |
| chr1 | 167468015 | 167470605 | 2591 | 1986 | 64  | 42.18 | 3.92 | 47.08 |
| chr1 | 167733357 | 167734037 | 681  | 249  | 16  | 30.86 | 4.52 | 50.9  |
| chr1 | 167891545 | 167893269 | 1725 | 1073 | 38  | 43.67 | 5.05 | 47.88 |
| chr1 | 167925505 | 167927526 | 2022 | 410  | 52  | 33.36 | 3.67 | 48.67 |
| chr1 | 168205438 | 168206972 | 1535 | 927  | 36  | 43.73 | 4.54 | 47.81 |
| chr1 | 168531265 | 168532358 | 1094 | 763  | 25  | 30.12 | 4.11 | 51.63 |
| chr1 | 168562804 | 168563557 | 754  | 286  | 17  | 30.83 | 6.16 | 50.9  |
| chr1 | 168863323 | 168864238 | 916  | 358  | 20  | 30.92 | 4.62 | 50.58 |
| chr1 | 168958133 | 168959708 | 1576 | 730  | 34  | 47.21 | 4.52 | 47.82 |
| chr1 | 169296484 | 169297321 | 838  | 603  | 18  | 30.27 | 4.93 | 51.68 |
| chr1 | 169315803 | 169316516 | 714  | 290  | 17  | 33.29 | 6.16 | 48.83 |
| chr1 | 169354989 | 169355982 | 994  | 709  | 20  | 30.11 | 4.93 | 51.59 |
| chr1 | 169649430 | 169650285 | 856  | 579  | 21  | 32.35 | 4.11 | 49.9  |
| chr1 | 169930079 | 169930918 | 840  | 250  | 19  | 34.39 | 4.11 | 47.73 |
| chr1 | 170059635 | 170060539 | 905  | 291  | 19  | 30.73 | 4.93 | 50.98 |
| chr1 | 170692837 | 170693905 | 1069 | 669  | 22  | 30.26 | 4.52 | 51.61 |
| chr1 | 170807771 | 170808497 | 727  | 279  | 17  | 32.47 | 4.93 | 49.49 |
| chr1 | 171073095 | 171074508 | 1414 | 1130 | 30  | 31.33 | 4.11 | 50.25 |
| chr1 | 171090584 | 171091529 | 946  | 329  | 20  | 32.59 | 4.11 | 49.31 |
| chr1 | 171148343 | 171149192 | 850  | 324  | 20  | 34.15 | 6.09 | 47.99 |
| chr1 | 171643480 | 171645006 | 1527 | 252  | 31  | 42.01 | 4.11 | 47.05 |
| chr1 | 171744046 | 171745189 | 1144 | 410  | 26  | 32.82 | 4.24 | 49.43 |
| chr1 | 172106392 | 172107543 | 1152 | 477  | 24  | 33.38 | 6.12 | 48.68 |

|      |           |           |      |      |    |       |      |       |
|------|-----------|-----------|------|------|----|-------|------|-------|
| chr1 | 172140172 | 172140900 | 729  | 443  | 17 | 32.34 | 6.16 | 49.9  |
| chr1 | 172266490 | 172267407 | 918  | 370  | 19 | 30.05 | 4.52 | 51.47 |
| chr1 | 172349893 | 172350810 | 918  | 376  | 20 | 34.13 | 6.16 | 48.07 |
| chr1 | 172352989 | 172353818 | 830  | 412  | 18 | 30.71 | 5.34 | 50.99 |
| chr1 | 172607830 | 172608672 | 843  | 556  | 19 | 30.47 | 3.81 | 51.22 |
| chr1 | 172688307 | 172689559 | 1253 | 568  | 26 | 36.47 | 5.34 | 47.16 |
| chr1 | 172852734 | 172853612 | 879  | 283  | 19 | 31.21 | 5.24 | 50.57 |
| chr1 | 172866562 | 172867530 | 969  | 482  | 22 | 33.15 | 5.9  | 49.17 |
| chr1 | 172873048 | 172874155 | 1108 | 619  | 23 | 30.5  | 5.97 | 51.31 |
| chr1 | 172910243 | 172911036 | 794  | 289  | 19 | 35.67 | 4.78 | 47.17 |
| chr1 | 173070794 | 173072096 | 1303 | 746  | 31 | 54.3  | 6.98 | 54.34 |
| chr1 | 173142946 | 173143939 | 994  | 257  | 23 | 38.21 | 4.52 | 46.34 |
| chr1 | 173160508 | 173161771 | 1264 | 473  | 27 | 34.9  | 4.57 | 47.61 |
| chr1 | 173170182 | 173171385 | 1204 | 570  | 32 | 59    | 6.09 | 52.48 |
| chr1 | 173419974 | 173421421 | 1448 | 764  | 35 | 51.86 | 5.33 | 50.88 |
| chr1 | 173565804 | 173566703 | 900  | 281  | 20 | 31.81 | 4.62 | 49.81 |
| chr1 | 173894546 | 173895218 | 673  | 357  | 18 | 40.96 | 5.75 | 46.29 |
| chr1 | 173897850 | 173898403 | 554  | 277  | 17 | 44.21 | 6.45 | 48.11 |
| chr1 | 174151374 | 174152518 | 1145 | 554  | 25 | 34.84 | 5.45 | 47.57 |
| chr1 | 174194650 | 174195689 | 1040 | 450  | 22 | 31.68 | 4.93 | 49.85 |
| chr1 | 174509677 | 174510483 | 807  | 278  | 18 | 32.02 | 4.52 | 49.75 |
| chr1 | 174754868 | 174755917 | 1050 | 279  | 29 | 62.39 | 8.22 | 55.46 |
| chr1 | 174944812 | 174945797 | 986  | 680  | 26 | 48.6  | 5.84 | 49.85 |
| chr1 | 174952920 | 174954120 | 1201 | 649  | 26 | 39.12 | 6.16 | 46.33 |
| chr1 | 175101713 | 175102330 | 618  | 335  | 15 | 30.33 | 5.75 | 51.64 |
| chr1 | 176096136 | 176096941 | 806  | 536  | 21 | 30.53 | 4.98 | 51.24 |
| chr1 | 176264685 | 176265479 | 795  | 429  | 22 | 46.76 | 6.98 | 47.43 |
| chr1 | 176267256 | 176267850 | 595  | 335  | 15 | 31.89 | 4.93 | 49.84 |
| chr1 | 176784636 | 176785351 | 716  | 285  | 17 | 33.16 | 5.34 | 49.13 |
| chr1 | 176797017 | 176798267 | 1251 | 465  | 25 | 32.83 | 5.75 | 49.4  |
| chr1 | 177741092 | 177742045 | 954  | 505  | 20 | 32.16 | 4.52 | 49.86 |
| chr1 | 178075983 | 178076770 | 788  | 286  | 18 | 33.15 | 5.75 | 49.12 |
| chr1 | 178234373 | 178235373 | 1001 | 671  | 22 | 33.69 | 5.75 | 48.59 |
| chr1 | 178597482 | 178598559 | 1078 | 371  | 24 | 37.65 | 6.16 | 45.98 |
| chr1 | 178773045 | 178774797 | 1753 | 1117 | 45 | 51.27 | 4.12 | 51.4  |
| chr1 | 178903257 | 178903951 | 695  | 271  | 18 | 39.32 | 5.75 | 46.58 |
| chr1 | 179064547 | 179065429 | 883  | 271  | 20 | 36.16 | 4.93 | 46.96 |
| chr1 | 179160372 | 179161948 | 1577 | 538  | 32 | 37.68 | 4.57 | 46.4  |
| chr1 | 179466780 | 179467686 | 907  | 619  | 19 | 30.63 | 4.11 | 51.2  |
| chr1 | 179483148 | 179484180 | 1033 | 461  | 22 | 32.03 | 4.93 | 49.77 |
| chr1 | 179930336 | 179931445 | 1110 | 367  | 29 | 38.82 | 6.02 | 46.17 |
| chr1 | 180289559 | 180290920 | 1362 | 610  | 30 | 38.69 | 3.31 | 46.23 |
| chr1 | 180375682 | 180376970 | 1289 | 637  | 29 | 37.38 | 6.13 | 46.57 |
| chr1 | 180912279 | 180913044 | 766  | 289  | 17 | 30.13 | 4.11 | 51.65 |
| chr1 | 182229323 | 182230210 | 888  | 630  | 19 | 31.65 | 6.57 | 49.86 |
| chr1 | 182233188 | 182233879 | 692  | 353  | 16 | 30.18 | 5.75 | 51.67 |
| chr1 | 183177893 | 183178603 | 711  | 463  | 17 | 33.48 | 4.11 | 48.67 |
| chr1 | 183350298 | 183351230 | 933  | 465  | 20 | 33.29 | 4.93 | 48.81 |
| chr1 | 183986779 | 183987686 | 908  | 243  | 20 | 34.7  | 4.52 | 47.74 |
| chr1 | 184058463 | 184059782 | 1320 | 479  | 28 | 40.82 | 5.34 | 46.34 |
| chr1 | 184776464 | 184777339 | 876  | 221  | 21 | 38.02 | 4.28 | 46.45 |
| chr1 | 184807388 | 184808200 | 813  | 380  | 20 | 31.06 | 4.11 | 50.76 |

|      |           |           |      |      |    |        |      |       |
|------|-----------|-----------|------|------|----|--------|------|-------|
| chr1 | 185062181 | 185064456 | 2276 | 673  | 44 | 45.84  | 4.89 | 50    |
| chr1 | 185119091 | 185119805 | 715  | 418  | 23 | 53.76  | 6.85 | 52.24 |
| chr1 | 185122790 | 185124366 | 1577 | 669  | 45 | 50.49  | 4.25 | 51.5  |
| chr1 | 185217259 | 185218145 | 887  | 607  | 19 | 31.7   | 4.11 | 49.74 |
| chr1 | 185526989 | 185527936 | 948  | 603  | 22 | 36.63  | 4.52 | 46.89 |
| chr1 | 185576328 | 185578202 | 1875 | 684  | 44 | 34.71  | 4.1  | 47.69 |
| chr1 | 185689647 | 185691425 | 1779 | 411  | 35 | 35.54  | 4.19 | 47.19 |
| chr1 | 185907912 | 185909004 | 1093 | 671  | 26 | 40.97  | 5.77 | 46.24 |
| chr1 | 185970349 | 185971220 | 872  | 289  | 19 | 32.54  | 4.52 | 49.4  |
| chr1 | 186062418 | 186063327 | 910  | 531  | 22 | 38.91  | 6.16 | 46.27 |
| chr1 | 186265200 | 186266170 | 971  | 246  | 21 | 35.32  | 4.52 | 47.45 |
| chr1 | 186436336 | 186438411 | 2076 | 775  | 47 | 39.7   | 5.6  | 46.56 |
| chr1 | 186478853 | 186479838 | 986  | 549  | 20 | 30.51  | 5.75 | 51.28 |
| chr1 | 186979391 | 186980384 | 994  | 512  | 23 | 38.21  | 7.39 | 46.34 |
| chr1 | 187090145 | 187092088 | 1944 | 1147 | 48 | 80.44  | 5.75 | 53.85 |
| chr1 | 187150984 | 187151795 | 812  | 291  | 19 | 36.1   | 4.52 | 46.97 |
| chr1 | 187574286 | 187575045 | 760  | 274  | 18 | 34.89  | 3.7  | 47.66 |
| chr1 | 187958912 | 187960461 | 1550 | 877  | 36 | 56.73  | 4.93 | 53.4  |
| chr1 | 188045932 | 188046828 | 897  | 536  | 20 | 35.33  | 4.93 | 47.42 |
| chr1 | 188210709 | 188211764 | 1056 | 739  | 25 | 43.15  | 5.75 | 47.31 |
| chr1 | 188705473 | 188706592 | 1120 | 832  | 24 | 35.42  | 4.52 | 47.5  |
| chr1 | 189339195 | 189340201 | 1007 | 559  | 21 | 33.37  | 4.93 | 48.68 |
| chr1 | 189763131 | 189763958 | 828  | 283  | 18 | 30.83  | 6.98 | 50.88 |
| chr1 | 190074729 | 190076362 | 1634 | 1321 | 36 | 43.96  | 5.22 | 47.8  |
| chr1 | 190619539 | 190621302 | 1764 | 1477 | 51 | 101.69 | 6.69 | 30.43 |
| chr1 | 190691687 | 190692689 | 1003 | 645  | 22 | 33.58  | 6.16 | 48.66 |
| chr1 | 191637136 | 191638692 | 1557 | 290  | 37 | 60.57  | 6.16 | 55.51 |
| chr1 | 191735290 | 191736597 | 1308 | 736  | 31 | 47.93  | 4.57 | 49.33 |
| chr1 | 191836532 | 191837521 | 990  | 728  | 21 | 34.28  | 4.93 | 47.79 |
| chr1 | 191968071 | 191968924 | 854  | 582  | 26 | 37.66  | 5.71 | 46.04 |
| chr1 | 191982782 | 191983588 | 807  | 428  | 18 | 32.02  | 4.52 | 49.75 |
| chr1 | 192311917 | 192313546 | 1630 | 278  | 34 | 41.24  | 4.33 | 46.7  |
| chr1 | 192738917 | 192740455 | 1539 | 721  | 37 | 31.19  | 5.71 | 50.52 |
| chr1 | 193467567 | 193468981 | 1415 | 831  | 30 | 43.77  | 4.93 | 47.76 |
| chr1 | 193544293 | 193545953 | 1661 | 1379 | 33 | 39.47  | 5.34 | 47.03 |
| chr1 | 193968606 | 193969581 | 976  | 619  | 20 | 31.01  | 5.34 | 50.49 |
| chr1 | 193994339 | 193995744 | 1406 | 204  | 30 | 44.24  | 5.75 | 48.29 |
| chr1 | 194127193 | 194128069 | 877  | 589  | 21 | 41     | 4.93 | 46.23 |
| chr1 | 194618724 | 194619599 | 876  | 618  | 20 | 36.58  | 5.34 | 46.91 |
| chr1 | 194651558 | 194652284 | 727  | 376  | 19 | 41.9   | 6.98 | 46.94 |
| chr1 | 194725148 | 194726135 | 988  | 697  | 22 | 34.39  | 4.93 | 47.77 |
| chr1 | 194756461 | 194757569 | 1109 | 664  | 24 | 35.99  | 4.93 | 47.09 |
| chr1 | 194852301 | 194853819 | 1519 | 938  | 32 | 46.24  | 5.34 | 48.73 |
| chr1 | 194862862 | 194864128 | 1267 | 651  | 25 | 32.1   | 6.57 | 49.72 |
| chr1 | 194873024 | 194874180 | 1157 | 683  | 25 | 37     | 5.3  | 47.01 |
| chr1 | 195024885 | 195026054 | 1170 | 488  | 30 | 58.48  | 6.57 | 54.09 |
| chr1 | 195486180 | 195486778 | 599  | 342  | 15 | 31.61  | 4.93 | 49.96 |
| chr1 | 195627238 | 195628195 | 958  | 476  | 20 | 31.95  | 4.52 | 49.8  |
| chr1 | 195833655 | 195835403 | 1749 | 1326 | 43 | 70.6   | 6.16 | 54.55 |
| chr1 | 196278132 | 196279291 | 1160 | 521  | 27 | 40.41  | 4.95 | 46.81 |
| chr1 | 196299287 | 196300276 | 990  | 571  | 22 | 34.28  | 5.34 | 47.79 |
| chr1 | 196633753 | 196634953 | 1201 | 728  | 25 | 35.21  | 4.52 | 47.22 |



|      |           |           |      |      |     |       |      |       |
|------|-----------|-----------|------|------|-----|-------|------|-------|
| chr1 | 196688423 | 196689792 | 1370 | 541  | 28  | 33.4  | 5.33 | 48.71 |
| chr1 | 196895234 | 196896171 | 938  | 688  | 20  | 33.02 | 4.11 | 49.11 |
| chr1 | 197510526 | 197512030 | 1505 | 937  | 37  | 63.79 | 5.34 | 54.41 |
| chr1 | 197576286 | 197577520 | 1235 | 725  | 26  | 30.19 | 5.1  | 51.73 |
| chr1 | 197628109 | 197629000 | 892  | 613  | 20  | 32.26 | 5.77 | 50.07 |
| chr1 | 197838279 | 197839142 | 864  | 578  | 19  | 32.99 | 4.52 | 49.23 |
| chr1 | 197843644 | 197844667 | 1024 | 596  | 23  | 32.89 | 4.62 | 49.34 |
| chr1 | 197960787 | 197962004 | 1218 | 495  | 26  | 38.23 | 5.75 | 46.28 |
| chr1 | 198071607 | 198072757 | 1151 | 518  | 23  | 30.12 | 6.98 | 51.63 |
| chr1 | 198197896 | 198199238 | 1343 | 760  | 33  | 36.13 | 6.02 | 46.97 |
| chr1 | 198215462 | 198217038 | 1577 | 873  | 41  | 70.29 | 5.39 | 53.91 |
| chr1 | 198304254 | 198305073 | 820  | 263  | 19  | 35.61 | 6.16 | 47.29 |
| chr1 | 198335960 | 198337109 | 1150 | 495  | 27  | 46.16 | 6.57 | 48.86 |
| chr1 | 198611911 | 198617981 | 6071 | 3882 | 150 | 57.87 | 5.13 | 53.12 |
| chr1 | 198702265 | 198704388 | 2124 | 1037 | 55  | 53.23 | 4.72 | 51.69 |
| chr1 | 199472246 | 199474167 | 1922 | 1383 | 42  | 45.91 | 3.88 | 49.73 |
| chr1 | 199591980 | 199592878 | 899  | 504  | 19  | 31.05 | 4.93 | 50.69 |
| chr1 | 200520642 | 200521610 | 969  | 316  | 20  | 31    | 4.89 | 50.53 |
| chr1 | 200836034 | 200837883 | 1850 | 495  | 37  | 45.24 | 4.52 | 49.29 |
| chr1 | 201593387 | 201594369 | 983  | 331  | 22  | 34.66 | 5.75 | 47.66 |
| chr1 | 201806737 | 201807664 | 928  | 441  | 21  | 34.25 | 4.62 | 47.9  |
| chr1 | 202406220 | 202407202 | 983  | 471  | 22  | 34.66 | 5.34 | 47.66 |
| chr1 | 202892842 | 202894471 | 1630 | 952  | 36  | 39.76 | 3.88 | 46.73 |
| chr1 | 202967793 | 202968622 | 830  | 243  | 22  | 39.78 | 4.57 | 46.63 |
| chr1 | 203765227 | 203765933 | 707  | 419  | 22  | 37.53 | 4.36 | 45.94 |
| chr1 | 203844143 | 203844989 | 847  | 568  | 19  | 30.24 | 5.71 | 51.74 |
| chr1 | 203858113 | 203859277 | 1165 | 602  | 26  | 41.07 | 6.16 | 46.37 |
| chr1 | 205142199 | 205143700 | 1502 | 963  | 32  | 47.12 | 4.52 | 47.5  |
| chr1 | 206495623 | 206497707 | 2085 | 460  | 47  | 31.7  | 4.57 | 49.75 |
| chr1 | 206702931 | 206703757 | 827  | 253  | 18  | 30.88 | 6.16 | 50.73 |
| chr1 | 206858696 | 206859476 | 781  | 339  | 21  | 37.85 | 5.88 | 46.81 |
| chr1 | 206861321 | 206862259 | 939  | 430  | 22  | 37.16 | 5.75 | 46.85 |
| chr1 | 206950593 | 206951448 | 856  | 617  | 19  | 33.45 | 4.11 | 48.63 |
| chr1 | 207199254 | 207200131 | 878  | 602  | 20  | 36.46 | 6.16 | 47.12 |
| chr1 | 207494143 | 207495601 | 1459 | 972  | 35  | 41.82 | 4.75 | 46.97 |
| chr1 | 207803862 | 207804775 | 914  | 291  | 19  | 30.26 | 4.93 | 51.67 |
| chr1 | 208471169 | 208472053 | 885  | 456  | 20  | 36.04 | 4.11 | 46.89 |
| chr1 | 208917214 | 208918066 | 853  | 567  | 19  | 33.62 | 4.93 | 48.69 |
| chr1 | 209244176 | 209245118 | 943  | 257  | 23  | 40.27 | 6.86 | 46.83 |
| chr1 | 209359564 | 209360393 | 830  | 271  | 19  | 31.22 | 3.81 | 50.57 |
| chr1 | 209733506 | 209734401 | 896  | 684  | 19  | 31.21 | 4.11 | 50.51 |
| chr1 | 209993477 | 209994293 | 817  | 283  | 19  | 35.79 | 4.93 | 47.14 |
| chr1 | 210092904 | 210093799 | 896  | 662  | 19  | 31.21 | 4.52 | 50.51 |
| chr1 | 210331299 | 210332140 | 842  | 564  | 18  | 30.05 | 4.93 | 51.39 |
| chr1 | 211362898 | 211363720 | 823  | 368  | 18  | 31.11 | 4.52 | 50.68 |
| chr1 | 211439386 | 211440210 | 825  | 263  | 20  | 39.82 | 4.52 | 46.63 |
| chr1 | 211642490 | 211644411 | 1922 | 1289 | 38  | 39.21 | 5.33 | 46.36 |
| chr1 | 212632277 | 212633967 | 1691 | 280  | 36  | 34.94 | 4.76 | 47.7  |
| chr1 | 212709415 | 212710312 | 898  | 608  | 20  | 35.28 | 5.34 | 47.36 |
| chr1 | 212871122 | 212872701 | 1580 | 1294 | 33  | 30.29 | 4.79 | 51.67 |
| chr1 | 213121567 | 213122443 | 877  | 267  | 20  | 36.13 | 4.48 | 46.97 |
| chr1 | 213303799 | 213305557 | 1759 | 1220 | 40  | 44.41 | 4.45 | 48.55 |

|      |           |           |      |      |    |       |      |       |
|------|-----------|-----------|------|------|----|-------|------|-------|
| chr1 | 213673601 | 213674396 | 796  | 520  | 20 | 37.62 | 5.33 | 45.77 |
| chr1 | 213812891 | 213813708 | 818  | 529  | 21 | 45.06 | 5.75 | 49.06 |
| chr1 | 213952283 | 213953160 | 878  | 630  | 21 | 40.94 | 4.52 | 46.42 |
| chr1 | 214896739 | 214897842 | 1104 | 511  | 25 | 31.91 | 4.99 | 49.82 |
| chr1 | 215236156 | 215237438 | 1283 | 776  | 27 | 38.81 | 6.98 | 46.14 |
| chr1 | 215319480 | 215320357 | 878  | 591  | 19 | 32.2  | 5.34 | 49.92 |
| chr1 | 215750036 | 215751062 | 1027 | 375  | 21 | 32.33 | 4.11 | 49.98 |
| chr1 | 215822179 | 215822929 | 751  | 258  | 18 | 33.97 | 6.37 | 48.62 |
| chr1 | 216339624 | 216340550 | 927  | 583  | 20 | 33.62 | 4.93 | 48.71 |
| chr1 | 216401727 | 216402312 | 586  | 276  | 15 | 32.52 | 5.75 | 49.39 |
| chr1 | 216405152 | 216406064 | 913  | 448  | 20 | 34.41 | 4.52 | 47.76 |
| chr1 | 216712912 | 216713708 | 797  | 547  | 18 | 32.61 | 4.11 | 49.4  |
| chr1 | 216880373 | 216881253 | 881  | 382  | 21 | 36.46 | 6.09 | 47.11 |
| chr1 | 216882569 | 216883682 | 1114 | 531  | 24 | 34.62 | 7.25 | 47.79 |
| chr1 | 216891776 | 216893415 | 1640 | 411  | 37 | 45.29 | 4.74 | 49.35 |
| chr1 | 217034408 | 217035195 | 788  | 273  | 25 | 33.87 | 5.27 | 48.64 |
| chr1 | 217035227 | 217036315 | 1089 | 416  | 27 | 37.66 | 4.79 | 46.05 |
| chr1 | 217063569 | 217064337 | 769  | 279  | 23 | 54    | 6.16 | 52.56 |
| chr1 | 217233381 | 217234550 | 1170 | 740  | 27 | 39.84 | 5.71 | 46.61 |
| chr1 | 217405624 | 217406525 | 902  | 483  | 19 | 30.89 | 5.75 | 50.73 |
| chr1 | 217629407 | 217630361 | 955  | 537  | 20 | 32.11 | 4.93 | 49.7  |
| chr1 | 217763275 | 217764817 | 1543 | 924  | 31 | 30.79 | 3.88 | 51    |
| chr1 | 217800860 | 217802136 | 1277 | 592  | 28 | 40.19 | 5.12 | 46.64 |
| chr1 | 217826078 | 217827036 | 959  | 341  | 20 | 30.35 | 5.58 | 51.6  |
| chr1 | 218115520 | 218116467 | 948  | 523  | 20 | 32.48 | 4.11 | 49.47 |
| chr1 | 218137819 | 218138706 | 888  | 576  | 19 | 31.65 | 4.52 | 49.86 |
| chr1 | 218239000 | 218239851 | 852  | 584  | 20 | 38.07 | 5.34 | 46.37 |
| chr1 | 218433305 | 218434956 | 1652 | 1076 | 34 | 43.49 | 6.16 | 48.04 |
| chr1 | 218821021 | 218822224 | 1204 | 494  | 26 | 31.04 | 4.33 | 50.55 |
| chr1 | 219176986 | 219178429 | 1444 | 304  | 30 | 30    | 3.77 | 51.46 |
| chr1 | 219382931 | 219384837 | 1907 | 1327 | 47 | 46.93 | 4.32 | 47.75 |
| chr1 | 220010496 | 220011857 | 1362 | 454  | 34 | 58.83 | 4.89 | 52.44 |
| chr1 | 220162600 | 220164625 | 2026 | 519  | 47 | 33.42 | 3.4  | 48.69 |
| chr1 | 220457881 | 220458671 | 791  | 241  | 18 | 32.97 | 5.75 | 49.28 |
| chr1 | 221039251 | 221040751 | 1501 | 977  | 31 | 43.28 | 5.75 | 47.89 |
| chr1 | 221261334 | 221262378 | 1045 | 286  | 29 | 62.78 | 8.63 | 54.05 |
| chr1 | 221368498 | 221369467 | 970  | 442  | 22 | 35.38 | 5.34 | 47.52 |
| chr1 | 221430947 | 221431739 | 793  | 513  | 18 | 32.85 | 4.93 | 49.28 |
| chr1 | 221527941 | 221528631 | 691  | 402  | 17 | 34.8  | 5.34 | 47.53 |
| chr1 | 221613554 | 221614620 | 1067 | 456  | 22 | 30.35 | 6.16 | 51.61 |
| chr1 | 221813045 | 221813694 | 650  | 362  | 16 | 32.87 | 4.93 | 49.29 |
| chr1 | 222558345 | 222559168 | 824  | 356  | 18 | 31.05 | 5.75 | 50.62 |
| chr1 | 222755773 | 222757282 | 1510 | 277  | 32 | 33.33 | 3.42 | 48.7  |
| chr1 | 224435632 | 224436621 | 990  | 239  | 20 | 30.31 | 4.93 | 51.56 |
| chr1 | 224655200 | 224656242 | 1043 | 756  | 22 | 31.53 | 4.52 | 49.89 |
| chr1 | 224703521 | 224704372 | 852  | 351  | 19 | 33.68 | 4.93 | 48.55 |
| chr1 | 225444036 | 225444974 | 939  | 353  | 21 | 33.02 | 3.81 | 49.13 |
| chr1 | 225494519 | 225495932 | 1414 | 787  | 28 | 36.26 | 6.16 | 46.9  |
| chr1 | 225719307 | 225720438 | 1132 | 524  | 25 | 38.79 | 5.75 | 46.07 |
| chr1 | 226123642 | 226124912 | 1271 | 636  | 26 | 35.59 | 6.57 | 47.16 |
| chr1 | 226164140 | 226164980 | 841  | 351  | 18 | 30.11 | 6.16 | 51.58 |
| chr1 | 226548504 | 226551362 | 2859 | 1381 | 60 | 66.45 | 5.27 | 54.78 |

|      |           |           |      |      |    |       |      |       |
|------|-----------|-----------|------|------|----|-------|------|-------|
| chr1 | 226750096 | 226751967 | 1872 | 1534 | 37 | 42.21 | 4.01 | 46.97 |
| chr1 | 227014989 | 227016548 | 1560 | 465  | 34 | 41.16 | 4.52 | 46.45 |
| chr1 | 227108360 | 227109159 | 800  | 453  | 18 | 32.44 | 5.75 | 49.55 |
| chr1 | 227834278 | 227835260 | 983  | 298  | 23 | 36.42 | 4.72 | 47.15 |
| chr1 | 228012958 | 228014164 | 1207 | 770  | 28 | 40.86 | 4.89 | 46.34 |
| chr1 | 228410433 | 228411714 | 1282 | 631  | 25 | 31.43 | 5.75 | 50.09 |
| chr1 | 228593567 | 228594749 | 1183 | 905  | 29 | 52.97 | 4.93 | 50.57 |
| chr1 | 229620528 | 229621487 | 960  | 533  | 21 | 30.73 | 4.47 | 51.04 |
| chr1 | 229922196 | 229923085 | 890  | 262  | 20 | 35.75 | 4.52 | 47.03 |
| chr1 | 230094318 | 230095752 | 1435 | 1146 | 30 | 42.75 | 4.11 | 47.6  |
| chr1 | 230100125 | 230101163 | 1039 | 234  | 22 | 31.73 | 4.52 | 49.74 |
| chr1 | 230678135 | 230678984 | 850  | 415  | 19 | 33.8  | 5.34 | 48.83 |
| chr1 | 231376758 | 231378263 | 1506 | 1074 | 36 | 34.27 | 4.25 | 47.91 |
| chr1 | 231656345 | 231658011 | 1667 | 1394 | 30 | 39.2  | 4.52 | 46.28 |
| chr1 | 232199809 | 232200462 | 654  | 329  | 16 | 32.6  | 5.75 | 49.39 |
| chr1 | 233529935 | 233530922 | 988  | 496  | 20 | 30.41 | 4.11 | 51.4  |
| chr1 | 233756556 | 233757366 | 811  | 553  | 21 | 45.57 | 7.39 | 50.04 |
| chr1 | 234556903 | 234557811 | 909  | 541  | 22 | 33.01 | 5.89 | 49.17 |
| chr1 | 235110259 | 235111408 | 1150 | 685  | 25 | 37.82 | 5.34 | 46.7  |
| chr1 | 235307454 | 235308751 | 1298 | 726  | 29 | 40.6  | 4.95 | 46.75 |
| chr1 | 235368546 | 235369585 | 1040 | 466  | 25 | 32.99 | 4.45 | 49.19 |
| chr1 | 235387444 | 235388276 | 833  | 544  | 20 | 36.39 | 4.67 | 47.18 |
| chr1 | 235488306 | 235491251 | 2946 | 1378 | 86 | 92.21 | 5.09 | 36.67 |
| chr1 | 235495282 | 235496463 | 1182 | 280  | 31 | 32.16 | 4.14 | 49.93 |
| chr1 | 235746619 | 235747425 | 807  | 522  | 20 | 41.04 | 4.52 | 46.36 |
| chr1 | 235929546 | 235930607 | 1062 | 691  | 25 | 42.79 | 6.16 | 47.35 |
| chr1 | 236354039 | 236354856 | 818  | 273  | 18 | 31.39 | 4.93 | 50.18 |
| chr1 | 236429471 | 236431367 | 1897 | 692  | 38 | 32.08 | 4.45 | 49.79 |
| chr1 | 236768498 | 236770010 | 1513 | 1231 | 32 | 33.88 | 4.15 | 48.6  |
| chr1 | 237028659 | 237029309 | 651  | 288  | 17 | 34.02 | 5.33 | 48.58 |
| chr1 | 237394326 | 237395188 | 863  | 541  | 19 | 33.05 | 5.34 | 49.1  |
| chr1 | 237606613 | 237607361 | 749  | 499  | 17 | 31.13 | 4.93 | 50.63 |
| chr1 | 237710331 | 237711117 | 787  | 374  | 20 | 42.43 | 6.16 | 47.3  |
| chr1 | 237791045 | 237792039 | 995  | 483  | 21 | 34.01 | 4.93 | 48.54 |
| chr1 | 237814167 | 237815038 | 872  | 258  | 20 | 36.83 | 4.11 | 46.86 |
| chr1 | 238172707 | 238173428 | 722  | 324  | 17 | 32.78 | 4.93 | 49.39 |
| chr1 | 238495049 | 238495946 | 898  | 540  | 19 | 31.11 | 5.75 | 50.64 |
| chr1 | 238618149 | 238619003 | 855  | 234  | 19 | 32.56 | 4.03 | 49.34 |
| chr1 | 238721171 | 238722069 | 899  | 346  | 19 | 31.05 | 3.7  | 50.69 |
| chr1 | 239788183 | 239789099 | 917  | 428  | 20 | 34.18 | 4.52 | 47.96 |
| chr1 | 240190309 | 240191167 | 859  | 271  | 19 | 33.28 | 5.34 | 48.91 |
| chr1 | 240571396 | 240572678 | 1283 | 784  | 27 | 33.98 | 4.95 | 48.57 |
| chr1 | 240848133 | 240849411 | 1279 | 901  | 30 | 42.39 | 4.37 | 47.07 |
| chr1 | 240886595 | 240887494 | 900  | 203  | 19 | 31    | 6.16 | 50.47 |
| chr1 | 241290377 | 241291289 | 913  | 654  | 20 | 34.41 | 4.52 | 47.76 |
| chr1 | 241361627 | 241362595 | 969  | 678  | 24 | 44.14 | 5.34 | 48.04 |
| chr1 | 241643647 | 241644607 | 961  | 383  | 20 | 31.79 | 4.93 | 49.8  |
| chr1 | 241790046 | 241791214 | 1169 | 613  | 25 | 34.29 | 6.69 | 47.83 |
| chr1 | 242636124 | 242636967 | 844  | 555  | 19 | 34.15 | 6.16 | 48    |
| chr1 | 243557175 | 243558463 | 1289 | 465  | 28 | 40.34 | 6.77 | 46.89 |
| chr1 | 243723650 | 243724769 | 1120 | 525  | 24 | 35.42 | 5.75 | 47.5  |
| chr1 | 243797178 | 243798300 | 1123 | 414  | 25 | 39.28 | 5.34 | 46.46 |

|       |           |           |      |      |    |       |      |       |
|-------|-----------|-----------|------|------|----|-------|------|-------|
| chr1  | 244047744 | 244048846 | 1103 | 812  | 25 | 35.73 | 4.95 | 47.23 |
| chr1  | 244898838 | 244899888 | 1051 | 770  | 24 | 39.16 | 5.34 | 46.17 |
| chr1  | 245198100 | 245199271 | 1172 | 578  | 24 | 32.84 | 4.93 | 49.37 |
| chr1  | 245227356 | 245228372 | 1017 | 414  | 21 | 32.85 | 5.34 | 49.36 |
| chr1  | 245450121 | 245451010 | 890  | 659  | 20 | 35.75 | 4.52 | 47.03 |
| chr1  | 245810093 | 245811324 | 1232 | 581  | 30 | 34.1  | 3.74 | 48.18 |
| chr1  | 246051737 | 246052355 | 619  | 289  | 15 | 30.27 | 4.93 | 51.69 |
| chr1  | 246624009 | 246625087 | 1079 | 461  | 25 | 41.78 | 4.11 | 47.1  |
| chr1  | 246844316 | 246845285 | 970  | 539  | 21 | 30.19 | 4.09 | 51.74 |
| chr1  | 247034846 | 247035481 | 636  | 287  | 17 | 38.38 | 6.52 | 46.36 |
| chr1  | 247109368 | 247110275 | 908  | 495  | 21 | 39.03 | 4.93 | 46.21 |
| chr1  | 247990870 | 247991864 | 995  | 486  | 20 | 30.06 | 4.52 | 51.48 |
| chr1  | 248334070 | 248334967 | 898  | 252  | 20 | 35.28 | 4.93 | 47.36 |
| chr1  | 248435114 | 248436003 | 890  | 316  | 19 | 30.05 | 4.38 | 51.46 |
| chr1  | 248645704 | 248646677 | 974  | 410  | 23 | 36.29 | 5.84 | 46.97 |
| chr1  | 248662328 | 248663372 | 1045 | 469  | 21 | 31.43 | 5.75 | 50.04 |
| chr10 | 67739     | 68856     | 1118 | 555  | 26 | 43.76 | 5.75 | 47.71 |
| chr10 | 98955     | 100186    | 1232 | 696  | 27 | 41.48 | 7.39 | 47.02 |
| chr10 | 296210    | 297016    | 807  | 335  | 18 | 32.02 | 4.52 | 49.75 |
| chr10 | 824000    | 824977    | 978  | 282  | 21 | 34.93 | 4.11 | 47.58 |
| chr10 | 1089042   | 1090655   | 1614 | 246  | 38 | 44.96 | 3.77 | 48.76 |
| chr10 | 1330305   | 1331220   | 916  | 625  | 20 | 34.24 | 6.16 | 47.9  |
| chr10 | 1951391   | 1952427   | 1037 | 260  | 22 | 31.83 | 4.52 | 49.81 |
| chr10 | 2247305   | 2248509   | 1205 | 516  | 24 | 31.29 | 5.75 | 50.33 |
| chr10 | 2554308   | 2555133   | 826  | 544  | 19 | 35.24 | 5.75 | 47.26 |
| chr10 | 2761096   | 2761905   | 810  | 287  | 18 | 31.85 | 4.93 | 49.8  |
| chr10 | 2903272   | 2904228   | 957  | 288  | 20 | 32    | 4.11 | 49.74 |
| chr10 | 3617006   | 3619037   | 2032 | 650  | 37 | 37.65 | 5.75 | 46    |
| chr10 | 3689419   | 3691045   | 1627 | 1277 | 36 | 52.44 | 5.75 | 50.39 |
| chr10 | 4000926   | 4001609   | 684  | 268  | 19 | 35.58 | 6.16 | 47.2  |
| chr10 | 4139652   | 4140728   | 1077 | 589  | 24 | 37.71 | 6.16 | 46.49 |
| chr10 | 4282795   | 4283595   | 801  | 384  | 18 | 32.38 | 5.75 | 49.75 |
| chr10 | 4416761   | 4417695   | 935  | 375  | 20 | 33.18 | 4.11 | 49.11 |
| chr10 | 4421907   | 4423093   | 1187 | 711  | 30 | 30.87 | 4    | 50.85 |
| chr10 | 4437104   | 4438265   | 1162 | 612  | 27 | 45.45 | 5.75 | 49.74 |
| chr10 | 4502916   | 4503746   | 831  | 566  | 21 | 44.13 | 5.75 | 47.89 |
| chr10 | 4533624   | 4534582   | 959  | 570  | 20 | 31.9  | 5.75 | 49.83 |
| chr10 | 4953927   | 4954911   | 985  | 577  | 21 | 34.55 | 5.75 | 47.78 |
| chr10 | 4983953   | 4984740   | 788  | 534  | 18 | 33.15 | 4.52 | 49.12 |
| chr10 | 5798281   | 5799570   | 1290 | 573  | 30 | 30.53 | 3.39 | 51.27 |
| chr10 | 6244586   | 6245923   | 1338 | 721  | 32 | 56.54 | 7.8  | 53.59 |
| chr10 | 6388864   | 6390475   | 1612 | 664  | 33 | 38.54 | 3.94 | 46.28 |
| chr10 | 6542558   | 6543499   | 942  | 267  | 22 | 36.98 | 5.34 | 46.95 |
| chr10 | 7163263   | 7164777   | 1515 | 856  | 36 | 35.74 | 4.67 | 47.11 |
| chr10 | 7297160   | 7298825   | 1666 | 1130 | 36 | 40.51 | 4.74 | 46.98 |
| chr10 | 7329015   | 7329984   | 970  | 241  | 22 | 30.19 | 4.09 | 51.74 |
| chr10 | 7510260   | 7512859   | 2600 | 652  | 63 | 42.83 | 3.78 | 47.31 |
| chr10 | 7878801   | 7879680   | 880  | 667  | 19 | 32.09 | 4.52 | 49.72 |
| chr10 | 8312877   | 8313674   | 798  | 499  | 22 | 46.53 | 5.75 | 47.84 |
| chr10 | 8697217   | 8698060   | 844  | 378  | 21 | 43.22 | 5.34 | 47.65 |
| chr10 | 8742249   | 8743156   | 908  | 685  | 22 | 39.03 | 4.52 | 46.21 |
| chr10 | 8793526   | 8794383   | 858  | 280  | 19 | 33.33 | 4.11 | 48.66 |

|       |          |          |      |      |    |       |      |       |
|-------|----------|----------|------|------|----|-------|------|-------|
| chr10 | 9026206  | 9026911  | 706  | 419  | 17 | 33.81 | 5.34 | 48.84 |
| chr10 | 9472634  | 9473422  | 789  | 277  | 18 | 32.18 | 4.83 | 49.95 |
| chr10 | 9508645  | 9509931  | 1287 | 731  | 26 | 34.83 | 5.34 | 47.53 |
| chr10 | 9627950  | 9628953  | 1004 | 283  | 22 | 33.53 | 4.93 | 48.64 |
| chr10 | 9784846  | 9786732  | 1887 | 703  | 47 | 79.62 | 5.34 | 60    |
| chr10 | 9793472  | 9794907  | 1436 | 409  | 30 | 39.66 | 4.72 | 46.48 |
| chr10 | 9834620  | 9835474  | 855  | 497  | 19 | 31.98 | 6.37 | 49.84 |
| chr10 | 10666257 | 10667764 | 1508 | 627  | 31 | 37.41 | 4.57 | 46.65 |
| chr10 | 10949505 | 10950180 | 676  | 341  | 16 | 31.17 | 4.52 | 50.55 |
| chr10 | 12120942 | 12122228 | 1287 | 604  | 26 | 34.83 | 6.16 | 47.53 |
| chr10 | 13824315 | 13825442 | 1128 | 735  | 23 | 31.19 | 4.52 | 50.51 |
| chr10 | 14819098 | 14820033 | 936  | 290  | 21 | 37.33 | 4.52 | 46.7  |
| chr10 | 16078710 | 16079542 | 833  | 607  | 18 | 30.55 | 4.52 | 51.23 |
| chr10 | 16416843 | 16417827 | 985  | 496  | 20 | 30.56 | 4.93 | 51.26 |
| chr10 | 16554517 | 16555375 | 859  | 611  | 20 | 37.63 | 4.52 | 45.86 |
| chr10 | 17472242 | 17473138 | 897  | 439  | 22 | 39.72 | 5.34 | 46.59 |
| chr10 | 17572995 | 17574200 | 1206 | 626  | 24 | 31.25 | 5.75 | 50.5  |
| chr10 | 17656932 | 17657916 | 985  | 550  | 21 | 34.55 | 7.39 | 47.78 |
| chr10 | 17700345 | 17701273 | 929  | 509  | 23 | 41.04 | 6.04 | 46.38 |
| chr10 | 17863417 | 17864341 | 925  | 448  | 20 | 33.74 | 5.34 | 48.66 |
| chr10 | 19389622 | 19390265 | 644  | 410  | 17 | 38.13 | 5.75 | 46.28 |
| chr10 | 21235765 | 21237440 | 1676 | 1137 | 33 | 33.4  | 4.19 | 48.71 |
| chr10 | 21371712 | 21372599 | 888  | 612  | 20 | 35.86 | 4.52 | 47.02 |
| chr10 | 21887799 | 21889264 | 1466 | 1010 | 38 | 31.74 | 4.74 | 49.77 |
| chr10 | 21923261 | 21924454 | 1194 | 535  | 30 | 40.77 | 5.98 | 46.55 |
| chr10 | 21988972 | 21990321 | 1350 | 612  | 32 | 40.61 | 4.07 | 46.73 |
| chr10 | 22011382 | 22012658 | 1277 | 773  | 35 | 32.93 | 3.42 | 49.33 |
| chr10 | 22548292 | 22549051 | 760  | 365  | 17 | 30.48 | 4.52 | 51.27 |
| chr10 | 22588266 | 22589184 | 919  | 444  | 21 | 38.35 | 6.16 | 46.36 |
| chr10 | 23081374 | 23082467 | 1094 | 449  | 23 | 32.84 | 4.52 | 49.38 |
| chr10 | 23114039 | 23114905 | 867  | 221  | 22 | 37.34 | 4.95 | 46.78 |
| chr10 | 23394108 | 23395008 | 901  | 519  | 19 | 30.95 | 4.52 | 50.5  |
| chr10 | 23441817 | 23443519 | 1703 | 582  | 35 | 44.77 | 4.52 | 48.89 |
| chr10 | 23585895 | 23586876 | 982  | 486  | 20 | 30.71 | 4.93 | 51.01 |
| chr10 | 23912507 | 23913361 | 855  | 492  | 22 | 42.47 | 4.52 | 47.34 |
| chr10 | 24410758 | 24411651 | 894  | 254  | 22 | 39.91 | 6.16 | 46.62 |
| chr10 | 25639381 | 25640103 | 723  | 446  | 17 | 32.72 | 4.52 | 49.39 |
| chr10 | 26036186 | 26036887 | 702  | 417  | 17 | 34.07 | 6.57 | 48.38 |
| chr10 | 26307719 | 26308832 | 1114 | 514  | 24 | 35.73 | 6.16 | 47.24 |
| chr10 | 26587263 | 26588078 | 816  | 480  | 19 | 32.04 | 4.57 | 49.78 |
| chr10 | 26761936 | 26763040 | 1105 | 631  | 23 | 30.64 | 7.17 | 51.19 |
| chr10 | 26894634 | 26895804 | 1171 | 537  | 24 | 32.88 | 4.93 | 49.32 |
| chr10 | 27397719 | 27399113 | 1395 | 587  | 28 | 37.14 | 6.57 | 46.97 |
| chr10 | 27573630 | 27574533 | 904  | 618  | 21 | 39.28 | 6.57 | 46.47 |
| chr10 | 27632717 | 27634785 | 2069 | 1488 | 45 | 34.5  | 4.1  | 47.66 |
| chr10 | 27781713 | 27783211 | 1499 | 484  | 32 | 47.28 | 4.93 | 48.02 |
| chr10 | 27847291 | 27848273 | 983  | 517  | 22 | 34.66 | 5.34 | 47.66 |
| chr10 | 27880337 | 27881564 | 1228 | 660  | 28 | 45.84 | 5.34 | 50.08 |
| chr10 | 28531131 | 28532004 | 874  | 505  | 22 | 41.2  | 6.16 | 46.62 |
| chr10 | 28700847 | 28701576 | 730  | 383  | 19 | 41.68 | 4.52 | 47.15 |
| chr10 | 28875486 | 28876336 | 851  | 272  | 21 | 42.74 | 5.75 | 47.45 |
| chr10 | 29591827 | 29592832 | 1006 | 486  | 25 | 46.29 | 6.16 | 48.53 |

|       |          |          |      |      |     |       |      |       |
|-------|----------|----------|------|------|-----|-------|------|-------|
| chr10 | 29765017 | 29765840 | 824  | 430  | 21  | 44.63 | 6.98 | 48.91 |
| chr10 | 30290877 | 30291821 | 945  | 288  | 20  | 32.64 | 5.34 | 49.32 |
| chr10 | 30485724 | 30486618 | 895  | 633  | 20  | 35.45 | 4.93 | 47.41 |
| chr10 | 30541411 | 30542171 | 761  | 456  | 21  | 38.74 | 4.79 | 46.17 |
| chr10 | 30762106 | 30763214 | 1109 | 740  | 25  | 38.86 | 4.43 | 46.29 |
| chr10 | 30920470 | 30921174 | 705  | 377  | 17  | 30.42 | 4.57 | 51.34 |
| chr10 | 31198130 | 31198822 | 693  | 325  | 18  | 35.66 | 5.33 | 47.23 |
| chr10 | 31198896 | 31199824 | 929  | 638  | 21  | 37.75 | 4.93 | 46.67 |
| chr10 | 31248690 | 31249270 | 581  | 290  | 17  | 39.16 | 6.47 | 46.24 |
| chr10 | 31422115 | 31422643 | 529  | 264  | 15  | 36.81 | 5.43 | 46.82 |
| chr10 | 31538079 | 31538754 | 676  | 390  | 18  | 40.73 | 6.16 | 46.55 |
| chr10 | 31775256 | 31776238 | 983  | 655  | 21  | 33.01 | 4.78 | 49.17 |
| chr10 | 32098438 | 32099280 | 843  | 458  | 20  | 38.64 | 5.34 | 46.11 |
| chr10 | 32132068 | 32132834 | 767  | 269  | 18  | 30.32 | 5.65 | 51.57 |
| chr10 | 32321078 | 32322036 | 959  | 279  | 24  | 44.8  | 6.57 | 48.95 |
| chr10 | 32518900 | 32519724 | 825  | 398  | 19  | 35.3  | 4.93 | 47.33 |
| chr10 | 32530365 | 32531193 | 829  | 541  | 20  | 39.56 | 5.34 | 46.78 |
| chr10 | 32715997 | 32716861 | 865  | 385  | 20  | 37.26 | 4.52 | 46.48 |
| chr10 | 32737804 | 32738818 | 1015 | 735  | 23  | 32.76 | 4.95 | 49.4  |
| chr10 | 32744093 | 32745500 | 1408 | 638  | 29  | 40.26 | 5.34 | 46.76 |
| chr10 | 32861256 | 32862259 | 1004 | 255  | 24  | 37.34 | 4.95 | 46.77 |
| chr10 | 33029384 | 33030367 | 984  | 253  | 21  | 34.6  | 4.93 | 47.68 |
| chr10 | 33170809 | 33171772 | 964  | 515  | 21  | 35.72 | 5.34 | 47.25 |
| chr10 | 33220506 | 33222665 | 2160 | 675  | 48  | 38.9  | 4.36 | 46.25 |
| chr10 | 33316350 | 33317046 | 697  | 262  | 17  | 34.4  | 5.75 | 47.76 |
| chr10 | 33459267 | 33460194 | 928  | 268  | 20  | 33.57 | 4.93 | 48.57 |
| chr10 | 33552069 | 33552749 | 681  | 285  | 17  | 31.97 | 4.57 | 49.81 |
| chr10 | 33742676 | 33743486 | 811  | 523  | 22  | 45.57 | 6.98 | 50.04 |
| chr10 | 34633062 | 34634117 | 1056 | 536  | 22  | 30.89 | 6.16 | 50.76 |
| chr10 | 34801740 | 34802680 | 941  | 464  | 21  | 37.04 | 6.16 | 46.99 |
| chr10 | 34916524 | 34917263 | 740  | 257  | 19  | 40.95 | 4.52 | 46.37 |
| chr10 | 35484086 | 35486951 | 2866 | 1626 | 66  | 69.89 | 4.91 | 52.46 |
| chr10 | 35674494 | 35675408 | 915  | 454  | 19  | 30.21 | 4.93 | 51.69 |
| chr10 | 36666471 | 36667230 | 760  | 287  | 17  | 30.48 | 3.7  | 51.27 |
| chr10 | 36692205 | 36693034 | 830  | 275  | 19  | 34.99 | 5.34 | 47.59 |
| chr10 | 36990965 | 36991863 | 899  | 236  | 19  | 31.05 | 4.11 | 50.69 |
| chr10 | 37010660 | 37011874 | 1215 | 441  | 25  | 34.53 | 5.75 | 47.72 |
| chr10 | 37688634 | 37689489 | 856  | 521  | 19  | 33.45 | 5.75 | 48.63 |
| chr10 | 38580877 | 38581934 | 1058 | 464  | 21  | 30.79 | 4.93 | 50.99 |
| chr10 | 38944641 | 38945683 | 1043 | 677  | 27  | 36.7  | 5.82 | 46.99 |
| chr10 | 42506945 | 42507809 | 865  | 236  | 20  | 33.25 | 4.57 | 48.93 |
| chr10 | 42763507 | 42764780 | 1274 | 869  | 36  | 40.46 | 5.57 | 46.94 |
| chr10 | 42829519 | 42830882 | 1364 | 538  | 29  | 42.48 | 6.16 | 47.24 |
| chr10 | 43080390 | 43080960 | 571  | 285  | 16  | 37.66 | 6.57 | 46.06 |
| chr10 | 43124494 | 43125358 | 865  | 587  | 20  | 36.86 | 5.71 | 46.78 |
| chr10 | 43604321 | 43612321 | 8001 | 6833 | 251 | 80.26 | 5.25 | 56.6  |
| chr10 | 43680346 | 43681264 | 919  | 666  | 20  | 30.21 | 4.19 | 51.75 |
| chr10 | 43903586 | 43904797 | 1212 | 999  | 31  | 42.04 | 4.24 | 46.99 |
| chr10 | 44262170 | 44263076 | 907  | 646  | 21  | 31.46 | 4.99 | 50.02 |
| chr10 | 44497018 | 44497742 | 725  | 271  | 17  | 32.59 | 5.34 | 49.4  |
| chr10 | 44620560 | 44621216 | 657  | 278  | 16  | 32.4  | 5.34 | 49.68 |
| chr10 | 45189980 | 45191139 | 1160 | 485  | 24  | 33.41 | 6.57 | 48.7  |

|       |          |          |      |      |     |       |      |       |
|-------|----------|----------|------|------|-----|-------|------|-------|
| chr10 | 45231791 | 45232686 | 896  | 449  | 19  | 31.21 | 4.93 | 50.51 |
| chr10 | 45612837 | 45613493 | 657  | 369  | 17  | 37.18 | 5.75 | 46.92 |
| chr10 | 47141520 | 47145833 | 4314 | 2844 | 117 | 90.07 | 4.74 | 41.94 |
| chr10 | 48360001 | 48360674 | 674  | 281  | 16  | 31.3  | 4.52 | 50.33 |
| chr10 | 48469821 | 48470632 | 812  | 261  | 18  | 31.74 | 4.11 | 49.76 |
| chr10 | 48907203 | 48908389 | 1187 | 780  | 26  | 39.87 | 6.16 | 46.65 |
| chr10 | 49809004 | 49810858 | 1855 | 753  | 40  | 56.26 | 5.34 | 53.86 |
| chr10 | 50157478 | 50158155 | 678  | 417  | 17  | 34.25 | 5.18 | 47.9  |
| chr10 | 50295054 | 50295868 | 815  | 546  | 19  | 35.92 | 5.75 | 47.05 |
| chr10 | 50410223 | 50411681 | 1459 | 506  | 35  | 45.03 | 5.65 | 49.09 |
| chr10 | 50473727 | 50474601 | 875  | 589  | 19  | 32.37 | 5.34 | 49.85 |
| chr10 | 50657706 | 50658541 | 836  | 589  | 19  | 30.34 | 4.14 | 51.6  |
| chr10 | 51095487 | 51097407 | 1921 | 1311 | 43  | 48.88 | 5.1  | 50.43 |
| chr10 | 51478935 | 51479816 | 882  | 267  | 24  | 33.24 | 5.29 | 49.06 |
| chr10 | 52035644 | 52036629 | 986  | 538  | 20  | 30.51 | 4.93 | 51.28 |
| chr10 | 52206035 | 52207108 | 1074 | 503  | 24  | 37.87 | 4.52 | 46.68 |
| chr10 | 52629898 | 52631205 | 1308 | 737  | 28  | 41.45 | 6.16 | 46.99 |
| chr10 | 52851606 | 52852640 | 1035 | 288  | 23  | 35.91 | 6.16 | 47.04 |
| chr10 | 53497612 | 53498431 | 820  | 236  | 19  | 35.61 | 4.52 | 47.29 |
| chr10 | 54395328 | 54396123 | 796  | 403  | 20  | 37.62 | 4.95 | 45.77 |
| chr10 | 54516838 | 54517729 | 892  | 638  | 19  | 31.43 | 4.93 | 50    |
| chr10 | 55328379 | 55329409 | 1031 | 501  | 21  | 32.13 | 5.34 | 49.78 |
| chr10 | 55787614 | 55788513 | 900  | 431  | 19  | 31    | 4.11 | 50.47 |
| chr10 | 55833164 | 55834135 | 972  | 296  | 21  | 35.27 | 6.98 | 47.3  |
| chr10 | 56123533 | 56125149 | 1617 | 1365 | 33  | 41.46 | 4.11 | 47.05 |
| chr10 | 56194986 | 56195671 | 686  | 270  | 17  | 31.64 | 4.57 | 49.89 |
| chr10 | 56461394 | 56462534 | 1141 | 721  | 23  | 30.58 | 4.52 | 51.23 |
| chr10 | 56852227 | 56853224 | 998  | 324  | 22  | 33.85 | 5.34 | 48.73 |
| chr10 | 57510297 | 57511357 | 1061 | 371  | 22  | 30.64 | 5.75 | 51.13 |
| chr10 | 58641862 | 58643672 | 1811 | 525  | 43  | 66.86 | 5.75 | 55.7  |
| chr10 | 59483895 | 59485134 | 1240 | 651  | 26  | 37.11 | 6.16 | 46.93 |
| chr10 | 59572140 | 59573437 | 1298 | 714  | 25  | 30.73 | 5.75 | 51.04 |
| chr10 | 59958692 | 59959589 | 898  | 614  | 22  | 39.65 | 4.93 | 46.42 |
| chr10 | 60051547 | 60053037 | 1491 | 781  | 35  | 44.96 | 6.49 | 48.82 |
| chr10 | 60336132 | 60336992 | 861  | 270  | 19  | 33.16 | 4.52 | 49.11 |
| chr10 | 61725928 | 61726767 | 840  | 458  | 18  | 30.16 | 4.93 | 51.72 |
| chr10 | 61773907 | 61774795 | 889  | 407  | 20  | 35.81 | 5.34 | 47.08 |
| chr10 | 61826145 | 61826885 | 741  | 513  | 17  | 30.74 | 4.03 | 50.97 |
| chr10 | 62026644 | 62027708 | 1065 | 799  | 24  | 38.37 | 4.93 | 46.39 |
| chr10 | 62583154 | 62583971 | 818  | 311  | 19  | 32.47 | 4.62 | 49.48 |
| chr10 | 62845840 | 62846744 | 905  | 275  | 19  | 30.73 | 5.34 | 50.98 |
| chr10 | 62974256 | 62975078 | 823  | 289  | 18  | 31.11 | 4.93 | 50.68 |
| chr10 | 63175739 | 63176633 | 895  | 606  | 19  | 31.27 | 4.52 | 50.46 |
| chr10 | 63207623 | 63208605 | 983  | 372  | 21  | 34.66 | 4.52 | 47.66 |
| chr10 | 63247197 | 63248097 | 901  | 616  | 20  | 35.1  | 5.34 | 47.35 |
| chr10 | 63259198 | 63260259 | 1062 | 627  | 21  | 30.6  | 6.57 | 51.21 |
| chr10 | 63438390 | 63439632 | 1243 | 556  | 30  | 46.89 | 4.52 | 47.6  |
| chr10 | 63449730 | 63450937 | 1208 | 676  | 29  | 45.7  | 4.95 | 49.77 |
| chr10 | 63489200 | 63490139 | 940  | 446  | 20  | 32.91 | 4.52 | 49.24 |
| chr10 | 63537159 | 63538128 | 970  | 284  | 21  | 35.38 | 4.93 | 47.52 |
| chr10 | 63991215 | 63993055 | 1841 | 1300 | 36  | 34.54 | 4.09 | 47.74 |
| chr10 | 64379068 | 64380018 | 951  | 282  | 21  | 36.46 | 4.93 | 47.14 |

|       |          |          |      |      |    |       |      |       |
|-------|----------|----------|------|------|----|-------|------|-------|
| chr10 | 64397376 | 64398527 | 1152 | 515  | 25 | 33.17 | 4.57 | 49.14 |
| chr10 | 64450543 | 64451457 | 915  | 508  | 20 | 33.3  | 5.64 | 48.79 |
| chr10 | 64764571 | 64765581 | 1011 | 658  | 21 | 33.16 | 4.11 | 49.1  |
| chr10 | 64843721 | 64844983 | 1263 | 806  | 29 | 48.04 | 5.34 | 49.23 |
| chr10 | 65730487 | 65731463 | 977  | 656  | 23 | 39.21 | 6.57 | 46.37 |
| chr10 | 65863889 | 65864768 | 880  | 215  | 19 | 32.09 | 4.11 | 49.72 |
| chr10 | 66257370 | 66258144 | 775  | 490  | 18 | 33.95 | 4.93 | 48.68 |
| chr10 | 66351025 | 66352023 | 999  | 272  | 23 | 37.93 | 4.52 | 46.58 |
| chr10 | 66378614 | 66379808 | 1195 | 664  | 24 | 31.75 | 4.52 | 49.81 |
| chr10 | 66449159 | 66449983 | 825  | 540  | 20 | 30.33 | 4.11 | 51.65 |
| chr10 | 66546445 | 66547946 | 1502 | 911  | 30 | 39.49 | 5.75 | 46.97 |
| chr10 | 66742245 | 66742918 | 674  | 384  | 16 | 31.3  | 5.34 | 50.33 |
| chr10 | 66790806 | 66791627 | 822  | 356  | 20 | 34.75 | 4.84 | 47.6  |
| chr10 | 66795366 | 66796643 | 1278 | 624  | 29 | 47.17 | 5.34 | 47.7  |
| chr10 | 67234711 | 67235676 | 966  | 675  | 22 | 35.6  | 5.75 | 47.23 |
| chr10 | 67557970 | 67559741 | 1772 | 548  | 32 | 41.04 | 4.08 | 46.4  |
| chr10 | 67706077 | 67707443 | 1367 | 571  | 31 | 50.46 | 5.34 | 51.88 |
| chr10 | 67753233 | 67755037 | 1805 | 669  | 44 | 43.4  | 4.36 | 47.89 |
| chr10 | 68142872 | 68143868 | 997  | 547  | 24 | 42.37 | 4.93 | 47.05 |
| chr10 | 68322545 | 68323733 | 1189 | 482  | 25 | 35.81 | 7.8  | 47.14 |
| chr10 | 68557572 | 68558245 | 674  | 412  | 18 | 34.39 | 5.41 | 47.79 |
| chr10 | 69218420 | 69219285 | 866  | 324  | 20 | 34.35 | 4.67 | 47.86 |
| chr10 | 69499408 | 69500547 | 1140 | 754  | 29 | 43.74 | 6.64 | 47.86 |
| chr10 | 69895954 | 69896908 | 955  | 548  | 26 | 42.17 | 4.79 | 47.01 |
| chr10 | 69972096 | 69973066 | 971  | 425  | 23 | 35.2  | 4.19 | 47.16 |
| chr10 | 70088660 | 70090539 | 1880 | 1222 | 47 | 33.02 | 4.18 | 49.16 |
| chr10 | 70450440 | 70451826 | 1387 | 878  | 37 | 39.04 | 4.57 | 46.25 |
| chr10 | 70714030 | 70715587 | 1558 | 1122 | 38 | 41.47 | 5.39 | 47.04 |
| chr10 | 70770554 | 70771277 | 724  | 257  | 17 | 32.66 | 5.34 | 49.29 |
| chr10 | 71901215 | 71902226 | 1012 | 413  | 23 | 37.19 | 4.11 | 46.84 |
| chr10 | 72399253 | 72400733 | 1481 | 885  | 31 | 38.69 | 3.81 | 46.2  |
| chr10 | 72873863 | 72874761 | 899  | 249  | 19 | 31.05 | 4.11 | 50.69 |
| chr10 | 73171199 | 73172199 | 1001 | 291  | 21 | 33.69 | 5.34 | 48.59 |
| chr10 | 73608115 | 73609374 | 1260 | 606  | 34 | 46.67 | 5.22 | 47.45 |
| chr10 | 73656007 | 73656944 | 938  | 650  | 21 | 37.22 | 4.52 | 46.81 |
| chr10 | 73718536 | 73719668 | 1133 | 503  | 26 | 42.88 | 6.16 | 47.3  |
| chr10 | 74077904 | 74079914 | 2011 | 681  | 44 | 31.14 | 4.21 | 50.66 |
| chr10 | 74324396 | 74325215 | 820  | 380  | 22 | 41.76 | 7.78 | 47.08 |
| chr10 | 74701769 | 74702783 | 1015 | 520  | 25 | 45.71 | 6.57 | 49.85 |
| chr10 | 74929548 | 74931032 | 1485 | 617  | 32 | 38.88 | 4.37 | 46.26 |
| chr10 | 75676159 | 75677083 | 925  | 342  | 20 | 33.74 | 4.93 | 48.66 |
| chr10 | 76017375 | 76019165 | 1791 | 519  | 42 | 58.92 | 4.52 | 52.78 |
| chr10 | 76050599 | 76051584 | 986  | 420  | 25 | 40.57 | 5.52 | 46.84 |
| chr10 | 76372570 | 76373705 | 1136 | 689  | 28 | 37.39 | 5.37 | 46.67 |
| chr10 | 76696578 | 76697818 | 1241 | 666  | 27 | 32.71 | 5.05 | 49.4  |
| chr10 | 76745252 | 76746067 | 816  | 306  | 24 | 38.82 | 4.44 | 46.18 |
| chr10 | 77091746 | 77092327 | 582  | 291  | 15 | 32.66 | 6.16 | 49.32 |
| chr10 | 77311062 | 77312015 | 954  | 492  | 21 | 36.29 | 6.16 | 46.94 |
| chr10 | 77402316 | 77403374 | 1059 | 504  | 21 | 30.74 | 4.93 | 50.97 |
| chr10 | 77444344 | 77445040 | 697  | 287  | 20 | 49.42 | 6.16 | 51.67 |
| chr10 | 78242505 | 78244254 | 1750 | 623  | 32 | 35.19 | 4.08 | 47.13 |
| chr10 | 78277191 | 78278235 | 1045 | 469  | 22 | 31.43 | 4.93 | 50.04 |



|       |           |           |      |      |    |       |      |       |
|-------|-----------|-----------|------|------|----|-------|------|-------|
| chr10 | 78356264  | 78357770  | 1507 | 835  | 33 | 46.86 | 5.34 | 47.24 |
| chr10 | 79264663  | 79266077  | 1415 | 661  | 33 | 31.28 | 4.36 | 50.4  |
| chr10 | 79433736  | 79434957  | 1222 | 247  | 28 | 46.19 | 5.34 | 48.74 |
| chr10 | 79803477  | 79804599  | 1123 | 653  | 25 | 39.28 | 4.93 | 46.46 |
| chr10 | 81016586  | 81017352  | 767  | 512  | 18 | 30.83 | 5.33 | 50.89 |
| chr10 | 81028070  | 81029093  | 1024 | 428  | 22 | 32.49 | 5.75 | 49.45 |
| chr10 | 81530185  | 81531625  | 1441 | 1018 | 34 | 46.5  | 4.47 | 48.01 |
| chr10 | 81566331  | 81569053  | 2723 | 600  | 63 | 67    | 4.79 | 56.16 |
| chr10 | 82077451  | 82077983  | 533  | 266  | 15 | 37.66 | 6.16 | 46.06 |
| chr10 | 82786243  | 82787435  | 1193 | 547  | 24 | 31.85 | 5.34 | 49.77 |
| chr10 | 82938261  | 82939432  | 1172 | 427  | 27 | 44.86 | 5.34 | 48.94 |
| chr10 | 83042697  | 83043488  | 792  | 504  | 18 | 32.91 | 5.34 | 49.22 |
| chr10 | 83172640  | 83173387  | 748  | 379  | 19 | 34.42 | 4.76 | 47.81 |
| chr10 | 83473217  | 83474293  | 1077 | 737  | 25 | 41.89 | 6.16 | 46.92 |
| chr10 | 83611116  | 83612017  | 902  | 456  | 21 | 39.4  | 6.98 | 46.96 |
| chr10 | 83680035  | 83680802  | 768  | 456  | 21 | 48.85 | 6.57 | 50.59 |
| chr10 | 83801777  | 83803014  | 1238 | 685  | 31 | 37.17 | 4.05 | 46.92 |
| chr10 | 83853517  | 83854741  | 1225 | 677  | 26 | 37.87 | 5.34 | 46.7  |
| chr10 | 83972065  | 83972832  | 768  | 479  | 20 | 31.87 | 4.27 | 49.75 |
| chr10 | 89095757  | 89096580  | 824  | 190  | 21 | 40.2  | 4.57 | 46.63 |
| chr10 | 90618896  | 90619689  | 794  | 513  | 18 | 32.79 | 6.57 | 49.41 |
| chr10 | 91010995  | 91012050  | 1056 | 344  | 28 | 56.99 | 6.16 | 52.87 |
| chr10 | 97283922  | 97284976  | 1055 | 529  | 21 | 30.94 | 6.16 | 50.6  |
| chr10 | 98318306  | 98319187  | 882  | 639  | 19 | 31.98 | 5.75 | 49.78 |
| chr10 | 101047761 | 101048671 | 911  | 582  | 21 | 38.84 | 5.34 | 46.22 |
| chr10 | 101767873 | 101770747 | 2875 | 549  | 62 | 55.23 | 5.17 | 53.19 |
| chr10 | 102633830 | 102634626 | 797  | 275  | 18 | 32.61 | 4.52 | 49.4  |
| chr10 | 102650673 | 102651501 | 829  | 291  | 20 | 33.75 | 4.42 | 48.68 |
| chr10 | 104459549 | 104460356 | 808  | 414  | 18 | 31.62 | 5.3  | 49.94 |
| chr10 | 104802096 | 104803727 | 1632 | 284  | 30 | 40.77 | 4.52 | 46.49 |
| chr10 | 105244795 | 105245907 | 1113 | 706  | 26 | 39.1  | 6.09 | 46.37 |
| chr10 | 105969418 | 105970320 | 903  | 283  | 20 | 34.99 | 4.11 | 47.57 |
| chr10 | 106057661 | 106058507 | 847  | 563  | 21 | 41.22 | 5.18 | 46.71 |
| chr10 | 106198267 | 106199335 | 1069 | 557  | 21 | 30.26 | 5.75 | 51.61 |
| chr10 | 106200420 | 106201235 | 816  | 516  | 18 | 31.51 | 3.7  | 49.84 |
| chr10 | 106759980 | 106760887 | 908  | 627  | 20 | 34.7  | 6.16 | 47.74 |
| chr10 | 107461704 | 107463300 | 1597 | 1105 | 34 | 46.15 | 5.75 | 49.06 |
| chr10 | 107587066 | 107587948 | 883  | 274  | 22 | 40.61 | 5.34 | 46.69 |
| chr10 | 108104789 | 108105564 | 776  | 491  | 18 | 33.89 | 5.75 | 48.57 |
| chr10 | 108394329 | 108395091 | 763  | 473  | 18 | 31.07 | 4.57 | 50.74 |
| chr10 | 109299201 | 109300164 | 964  | 607  | 20 | 31.63 | 5.34 | 49.87 |
| chr10 | 109474206 | 109475417 | 1212 | 460  | 28 | 34.48 | 5.14 | 47.75 |
| chr10 | 111167450 | 111168507 | 1058 | 496  | 21 | 30.79 | 5.75 | 50.99 |
| chr10 | 111439821 | 111440863 | 1043 | 640  | 22 | 31.53 | 4.93 | 49.89 |
| chr10 | 111472356 | 111473122 | 767  | 576  | 17 | 30.07 | 4.11 | 51.5  |
| chr10 | 111824193 | 111825103 | 911  | 619  | 19 | 30.42 | 4.52 | 51.31 |
| chr10 | 112058063 | 112060613 | 2551 | 1208 | 57 | 36.56 | 3.74 | 46.89 |
| chr10 | 112416170 | 112417113 | 944  | 632  | 20 | 32.69 | 6.16 | 49.42 |
| chr10 | 112448536 | 112449748 | 1213 | 634  | 24 | 30.93 | 6.16 | 50.58 |
| chr10 | 112679926 | 112681787 | 1862 | 1236 | 41 | 34.7  | 4.67 | 47.78 |
| chr10 | 112775881 | 112777116 | 1236 | 578  | 25 | 31.74 | 5.18 | 49.78 |
| chr10 | 112828939 | 112830361 | 1423 | 1219 | 34 | 32.46 | 3.96 | 49.45 |

|       |           |           |      |      |    |       |      |       |
|-------|-----------|-----------|------|------|----|-------|------|-------|
| chr10 | 113118689 | 113119572 | 884  | 284  | 19 | 30.93 | 4.43 | 50.59 |
| chr10 | 113287689 | 113288628 | 940  | 665  | 21 | 37.1  | 4.93 | 46.88 |
| chr10 | 113300735 | 113301744 | 1010 | 578  | 27 | 55.47 | 5.75 | 53.55 |
| chr10 | 113450653 | 113451464 | 812  | 286  | 19 | 33.96 | 3.94 | 48.62 |
| chr10 | 113686507 | 113687136 | 630  | 299  | 16 | 30.92 | 4.95 | 50.58 |
| chr10 | 113899711 | 113901702 | 1992 | 692  | 41 | 42.23 | 4.01 | 46.96 |
| chr10 | 113963300 | 113964446 | 1147 | 352  | 28 | 34.89 | 4.24 | 47.67 |
| chr10 | 115586579 | 115587719 | 1141 | 697  | 25 | 37.12 | 4.83 | 46.95 |
| chr10 | 115626497 | 115628294 | 1798 | 1451 | 40 | 34.62 | 4.36 | 47.78 |
| chr10 | 116353158 | 116354217 | 1060 | 419  | 22 | 30.69 | 4.93 | 51.01 |
| chr10 | 116446900 | 116447679 | 780  | 267  | 18 | 33.64 | 4.93 | 48.75 |
| chr10 | 116607047 | 116607994 | 948  | 697  | 21 | 36.63 | 4.52 | 46.89 |
| chr10 | 116709548 | 116710958 | 1411 | 535  | 31 | 34.04 | 3.73 | 48.51 |
| chr10 | 116713554 | 116714786 | 1233 | 869  | 31 | 45.16 | 4.84 | 48.87 |
| chr10 | 116727760 | 116729093 | 1334 | 800  | 31 | 44.75 | 5.58 | 48.89 |
| chr10 | 117032614 | 117033896 | 1283 | 1013 | 32 | 60.11 | 5.34 | 55.12 |
| chr10 | 117142878 | 117144221 | 1344 | 697  | 28 | 39.61 | 5.75 | 46.59 |
| chr10 | 117379523 | 117380343 | 821  | 594  | 18 | 31.22 | 5.34 | 50.51 |
| chr10 | 118182358 | 118183764 | 1407 | 707  | 30 | 44.18 | 6.98 | 47.99 |
| chr10 | 118279240 | 118279832 | 593  | 274  | 15 | 32.02 | 5.34 | 49.77 |
| chr10 | 118695189 | 118696285 | 1097 | 491  | 23 | 32.69 | 5.75 | 49.38 |
| chr10 | 118815439 | 118816933 | 1495 | 575  | 34 | 51.53 | 4.93 | 51.72 |
| chr10 | 118817941 | 118818953 | 1013 | 290  | 23 | 32.87 | 5.71 | 49.3  |
| chr10 | 119063687 | 119064332 | 646  | 266  | 16 | 33.14 | 6.16 | 49.15 |
| chr10 | 119079350 | 119080749 | 1400 | 646  | 33 | 43.28 | 4.74 | 47.86 |
| chr10 | 119236736 | 119238066 | 1331 | 531  | 27 | 36.46 | 5.75 | 47.14 |
| chr10 | 119557495 | 119558257 | 763  | 277  | 17 | 30.3  | 6.16 | 51.54 |
| chr10 | 119595996 | 119597019 | 1024 | 264  | 26 | 31.94 | 5.29 | 49.74 |
| chr10 | 119906354 | 119907568 | 1215 | 671  | 24 | 30.84 | 5.34 | 50.89 |
| chr10 | 120173182 | 120173918 | 737  | 260  | 18 | 36.39 | 4.52 | 47.16 |
| chr10 | 120262704 | 120263426 | 723  | 327  | 19 | 42.2  | 6.16 | 47.1  |
| chr10 | 120559749 | 120560927 | 1179 | 688  | 30 | 43.82 | 4.79 | 47.9  |
| chr10 | 120798287 | 120799349 | 1063 | 591  | 26 | 39.25 | 4.37 | 46.39 |
| chr10 | 121310717 | 121311708 | 992  | 497  | 20 | 30.21 | 4.93 | 51.73 |
| chr10 | 121410024 | 121411549 | 1526 | 507  | 39 | 53.64 | 5.48 | 51.95 |
| chr10 | 122160696 | 122161756 | 1061 | 280  | 22 | 30.64 | 5.34 | 51.13 |
| chr10 | 122496997 | 122497767 | 771  | 442  | 18 | 34.2  | 5.75 | 47.92 |
| chr10 | 122694129 | 122695181 | 1053 | 461  | 22 | 31.03 | 6.16 | 50.5  |
| chr10 | 123970617 | 123971661 | 1045 | 560  | 21 | 31.43 | 5.34 | 50.04 |
| chr10 | 125094854 | 125095901 | 1048 | 564  | 21 | 31.28 | 6.57 | 50.39 |
| chr10 | 125361498 | 125362278 | 781  | 517  | 19 | 38.11 | 4.52 | 46.38 |
| chr10 | 126404914 | 126405916 | 1003 | 534  | 21 | 32.56 | 4.43 | 49.38 |
| chr10 | 126472646 | 126473629 | 984  | 272  | 22 | 32.95 | 5.97 | 49.3  |
| chr10 | 126490318 | 126492942 | 2625 | 1930 | 52 | 33.15 | 3.7  | 49.15 |
| chr10 | 126527790 | 126528386 | 597  | 273  | 16 | 36.66 | 6.16 | 46.99 |
| chr10 | 126786697 | 126787803 | 1107 | 590  | 35 | 84.02 | 11.5 | 47.62 |
| chr10 | 127266061 | 127267093 | 1033 | 620  | 24 | 35.67 | 6.09 | 47.19 |
| chr10 | 127343119 | 127344136 | 1018 | 718  | 21 | 32.8  | 5.75 | 49.43 |
| chr10 | 127656980 | 127657787 | 808  | 538  | 19 | 36.36 | 6.16 | 47.14 |
| chr10 | 127775078 | 127776510 | 1433 | 661  | 34 | 55.09 | 6.57 | 53.04 |
| chr10 | 128050284 | 128051272 | 989  | 290  | 20 | 30.36 | 4.11 | 51.62 |
| chr10 | 128478391 | 128479149 | 759  | 280  | 18 | 34.95 | 5.75 | 47.68 |

|       |           |           |      |      |     |       |        |       |
|-------|-----------|-----------|------|------|-----|-------|--------|-------|
| chr10 | 129140038 | 129140829 | 792  | 426  | 20  | 42.08 | 5.34   | 46.92 |
| chr10 | 131794496 | 131796359 | 1864 | 373  | 38  | 51.95 | 6.57   | 51.19 |
| chr10 | 132158291 | 132159122 | 832  | 406  | 316 | 3100  | 105.97 | 0     |
| chr10 | 132616767 | 132617309 | 543  | 271  | 15  | 37.66 | 6.16   | 46.06 |
| chr10 | 133096745 | 133097743 | 999  | 447  | 21  | 32.77 | 5.64   | 49.42 |
| chr10 | 133875824 | 133876653 | 830  | 591  | 18  | 30.71 | 4.11   | 50.99 |
| chr10 | 133941067 | 133942321 | 1255 | 605  | 25  | 32.64 | 6.98   | 49.33 |
| chr10 | 134198600 | 134199330 | 731  | 476  | 21  | 51.88 | 6.98   | 50.81 |
| chr10 | 134486780 | 134488003 | 1224 | 568  | 25  | 34.09 | 6.98   | 48.19 |
| chr10 | 135237056 | 135237561 | 506  | 253  | 17  | 54.21 | 6.98   | 53.5  |
| chr10 | 135264697 | 135265378 | 682  | 350  | 19  | 31.01 | 5.29   | 50.49 |
| chr10 | 135296927 | 135299665 | 2739 | 2358 | 60  | 71.78 | 4.5    | 56    |
| chr10 | 135507391 | 135508241 | 851  | 576  | 23  | 42.86 | 5.71   | 47.28 |
| chr11 | 180271    | 181631    | 1361 | 283  | 41  | 58.18 | 5.9    | 53.78 |
| chr11 | 332492    | 333170    | 679  | 305  | 17  | 35.62 | 6.16   | 47.31 |
| chr11 | 770219    | 771039    | 821  | 541  | 18  | 31.22 | 4.93   | 50.51 |
| chr11 | 1341594   | 1342734   | 1141 | 278  | 27  | 46.71 | 5.34   | 47.48 |
| chr11 | 2250140   | 2251038   | 899  | 261  | 19  | 31.05 | 4.11   | 50.69 |
| chr11 | 2408121   | 2409689   | 1569 | 594  | 38  | 64.2  | 5.34   | 54.12 |
| chr11 | 2631797   | 2632625   | 829  | 539  | 18  | 30.77 | 4.11   | 50.95 |
| chr11 | 3069864   | 3070635   | 772  | 285  | 19  | 37.1  | 6.37   | 46.99 |
| chr11 | 3715885   | 3717406   | 1522 | 1246 | 34  | 35.99 | 3.77   | 47.14 |
| chr11 | 3752828   | 3753582   | 755  | 500  | 17  | 30.77 | 4.93   | 50.95 |
| chr11 | 4283224   | 4284257   | 1034 | 280  | 23  | 35.97 | 4.52   | 47.03 |
| chr11 | 4475032   | 4475719   | 688  | 251  | 16  | 30.42 | 4.93   | 51.34 |
| chr11 | 5018158   | 5018762   | 605  | 239  | 16  | 36.06 | 5.75   | 47.01 |
| chr11 | 5192954   | 5193835   | 882  | 240  | 22  | 40.68 | 6.16   | 46.47 |
| chr11 | 5295911   | 5296764   | 854  | 575  | 19  | 33.57 | 5.34   | 48.6  |
| chr11 | 5358543   | 5359856   | 1314 | 711  | 26  | 33.58 | 7.39   | 48.67 |
| chr11 | 5525575   | 5526492   | 918  | 286  | 19  | 30.05 | 4.52   | 51.47 |
| chr11 | 6689034   | 6690206   | 1173 | 517  | 27  | 44.8  | 4.93   | 48.98 |
| chr11 | 6841322   | 6842142   | 821  | 591  | 18  | 31.22 | 4.11   | 50.51 |
| chr11 | 7037722   | 7038456   | 735  | 472  | 17  | 31.97 | 4.93   | 49.85 |
| chr11 | 7152300   | 7153359   | 1060 | 283  | 23  | 34.58 | 4.93   | 47.71 |
| chr11 | 7219207   | 7220186   | 980  | 504  | 20  | 30.81 | 4.93   | 50.95 |
| chr11 | 7808921   | 7809837   | 917  | 535  | 20  | 30.31 | 3.81   | 51.55 |
| chr11 | 7993897   | 7994867   | 971  | 596  | 21  | 35.32 | 4.11   | 47.45 |
| chr11 | 8486168   | 8487468   | 1301 | 596  | 26  | 34.17 | 6.16   | 48.01 |
| chr11 | 8498003   | 8499676   | 1674 | 330  | 32  | 38.9  | 5.34   | 46.23 |
| chr11 | 8553550   | 8554493   | 944  | 654  | 21  | 36.86 | 4.93   | 46.73 |
| chr11 | 8610891   | 8611716   | 826  | 583  | 19  | 35.24 | 4.11   | 47.26 |
| chr11 | 9071943   | 9072842   | 900  | 629  | 19  | 31    | 4.52   | 50.47 |
| chr11 | 9589512   | 9591043   | 1532 | 693  | 45  | 46.35 | 5.53   | 48.4  |
| chr11 | 9653437   | 9654707   | 1271 | 781  | 30  | 32.06 | 4.67   | 49.81 |
| chr11 | 9993861   | 9995077   | 1217 | 568  | 31  | 45.38 | 6.51   | 49.64 |
| chr11 | 10094736  | 10096522  | 1787 | 796  | 38  | 44.32 | 4.14   | 48.19 |
| chr11 | 10264482  | 10265877  | 1396 | 576  | 31  | 48.81 | 4.52   | 50.58 |
| chr11 | 10779568  | 10781197  | 1630 | 999  | 37  | 56.34 | 5.34   | 53.77 |
| chr11 | 10878887  | 10880511  | 1625 | 399  | 36  | 39.2  | 4.19   | 46.3  |
| chr11 | 10976544  | 10977269  | 726  | 277  | 20  | 47.03 | 5.75   | 47.52 |
| chr11 | 11267721  | 11268671  | 951  | 580  | 69  | 237.7 | 15.54  | 18.18 |
| chr11 | 11421509  | 11422988  | 1480 | 399  | 30  | 40.53 | 4.11   | 46.86 |

|       |          |          |      |      |    |       |      |       |
|-------|----------|----------|------|------|----|-------|------|-------|
| chr11 | 11619590 | 11620317 | 728  | 219  | 19 | 37.79 | 4.57 | 46.7  |
| chr11 | 11688436 | 11689135 | 700  | 497  | 17 | 34.2  | 4.52 | 47.93 |
| chr11 | 12317291 | 12318062 | 772  | 312  | 19 | 38.71 | 4.93 | 46.28 |
| chr11 | 12931063 | 12931918 | 856  | 581  | 19 | 33.45 | 4.52 | 48.63 |
| chr11 | 13155046 | 13155824 | 779  | 291  | 18 | 33.7  | 5.75 | 48.57 |
| chr11 | 13195496 | 13196531 | 1036 | 273  | 25 | 44.38 | 4.93 | 48.52 |
| chr11 | 13412442 | 13413558 | 1117 | 401  | 29 | 43.75 | 5.14 | 47.8  |
| chr11 | 13676101 | 13677128 | 1028 | 339  | 24 | 30.04 | 4.11 | 51.45 |
| chr11 | 13764730 | 13765581 | 852  | 288  | 19 | 33.68 | 6.57 | 48.55 |
| chr11 | 14467973 | 14469402 | 1430 | 272  | 30 | 43    | 4.93 | 47.49 |
| chr11 | 14667186 | 14668412 | 1227 | 622  | 25 | 33.95 | 6.16 | 48.63 |
| chr11 | 14985228 | 14986317 | 1090 | 679  | 32 | 74.68 | 7.8  | 58.75 |
| chr11 | 15373159 | 15373975 | 817  | 291  | 18 | 31.45 | 4.93 | 50    |
| chr11 | 15751521 | 15752575 | 1055 | 505  | 22 | 30.94 | 6.16 | 50.6  |
| chr11 | 17095759 | 17097992 | 2234 | 829  | 47 | 54.4  | 5.3  | 53.98 |
| chr11 | 17172761 | 17176014 | 3254 | 555  | 71 | 40.44 | 3.71 | 46.91 |
| chr11 | 19171568 | 19173138 | 1571 | 519  | 33 | 43.64 | 4.93 | 47.8  |
| chr11 | 19414767 | 19415680 | 914  | 269  | 20 | 34.35 | 4.93 | 47.87 |
| chr11 | 20464100 | 20466992 | 2893 | 2552 | 68 | 67.66 | 4.65 | 54.61 |
| chr11 | 20486540 | 20488258 | 1719 | 1165 | 37 | 30.82 | 4.44 | 50.95 |
| chr11 | 20500257 | 20501241 | 985  | 428  | 24 | 33.52 | 4.54 | 48.63 |
| chr11 | 20943268 | 20944036 | 769  | 501  | 18 | 30.19 | 4.51 | 51.69 |
| chr11 | 20995273 | 20996073 | 801  | 280  | 19 | 36.8  | 6.16 | 46.76 |
| chr11 | 21043598 | 21044269 | 672  | 396  | 17 | 36.11 | 6.57 | 46.95 |
| chr11 | 21067405 | 21068443 | 1039 | 455  | 23 | 35.69 | 5.75 | 47.19 |
| chr11 | 21958985 | 21959899 | 915  | 623  | 19 | 30.21 | 6.16 | 51.69 |
| chr11 | 22085879 | 22086588 | 710  | 408  | 23 | 54.22 | 6.09 | 54.11 |
| chr11 | 22991390 | 22992283 | 894  | 612  | 21 | 30.1  | 3.77 | 51.59 |
| chr11 | 23287933 | 23288923 | 991  | 539  | 20 | 30.26 | 5.34 | 51.67 |
| chr11 | 23399259 | 23400308 | 1050 | 489  | 24 | 39.22 | 4.52 | 46.4  |
| chr11 | 23845141 | 23845914 | 774  | 265  | 19 | 38.19 | 4.48 | 46.31 |
| chr11 | 24544415 | 24545458 | 1044 | 584  | 23 | 31.24 | 6.85 | 50.48 |
| chr11 | 24750604 | 24751948 | 1345 | 718  | 28 | 39.56 | 6.16 | 46.76 |
| chr11 | 25987600 | 25988264 | 665  | 374  | 16 | 31.88 | 4.11 | 49.82 |
| chr11 | 26049416 | 26050963 | 1548 | 1319 | 36 | 49.19 | 4.52 | 50.78 |
| chr11 | 26548550 | 26549474 | 925  | 333  | 21 | 37.99 | 5.34 | 46.41 |
| chr11 | 26555765 | 26557268 | 1504 | 671  | 37 | 63.85 | 7.8  | 53.2  |
| chr11 | 26729493 | 26730355 | 863  | 288  | 21 | 41.93 | 6.98 | 46.96 |
| chr11 | 27454161 | 27456112 | 1952 | 288  | 37 | 40.83 | 5.34 | 46.34 |
| chr11 | 27712326 | 27713143 | 818  | 331  | 20 | 36.16 | 6.47 | 46.99 |
| chr11 | 28041855 | 28042894 | 1040 | 599  | 26 | 48.64 | 4.93 | 49.9  |
| chr11 | 28166764 | 28168052 | 1289 | 651  | 26 | 32.88 | 6.77 | 49.32 |
| chr11 | 28419125 | 28420186 | 1062 | 782  | 21 | 30.6  | 4.93 | 51.21 |
| chr11 | 28427739 | 28429220 | 1482 | 1218 | 34 | 31.18 | 4.05 | 50.54 |
| chr11 | 28849151 | 28850035 | 885  | 242  | 19 | 31.81 | 4.11 | 49.78 |
| chr11 | 29029391 | 29030278 | 888  | 641  | 19 | 31.65 | 4.11 | 49.86 |
| chr11 | 29301646 | 29302866 | 1221 | 518  | 24 | 30.57 | 6.98 | 51.24 |
| chr11 | 29589687 | 29590608 | 922  | 588  | 20 | 33.9  | 4.11 | 48.66 |
| chr11 | 29877918 | 29878998 | 1081 | 636  | 24 | 37.49 | 7.39 | 46.03 |
| chr11 | 29980607 | 29981213 | 607  | 328  | 16 | 35.91 | 6.16 | 47.02 |
| chr11 | 30179084 | 30180254 | 1171 | 449  | 25 | 36.72 | 4.93 | 47.04 |
| chr11 | 30365939 | 30367615 | 1677 | 1349 | 34 | 35.9  | 5.77 | 47.01 |

|       |          |          |      |      |    |       |      |       |
|-------|----------|----------|------|------|----|-------|------|-------|
| chr11 | 30637472 | 30638609 | 1138 | 524  | 23 | 30.72 | 6.16 | 51.04 |
| chr11 | 30649824 | 30650638 | 815  | 583  | 18 | 31.56 | 5.34 | 49.92 |
| chr11 | 30995024 | 30995980 | 957  | 531  | 22 | 36.11 | 6.16 | 46.95 |
| chr11 | 31372922 | 31373791 | 870  | 578  | 19 | 32.65 | 4.93 | 49.31 |
| chr11 | 31386290 | 31387958 | 1669 | 992  | 32 | 37.71 | 4.83 | 46.53 |
| chr11 | 31452706 | 31454266 | 1561 | 905  | 37 | 60.33 | 6.16 | 55.04 |
| chr11 | 31506677 | 31507517 | 841  | 597  | 19 | 34.33 | 5.34 | 47.74 |
| chr11 | 31540188 | 31540948 | 761  | 498  | 19 | 36.66 | 5.45 | 47.01 |
| chr11 | 31586716 | 31588389 | 1674 | 1271 | 40 | 58.81 | 5.33 | 52.28 |
| chr11 | 31645144 | 31646472 | 1329 | 567  | 28 | 38.29 | 6.37 | 46.38 |
| chr11 | 32618760 | 32619680 | 921  | 268  | 21 | 34.65 | 4.62 | 47.67 |
| chr11 | 32960707 | 32962028 | 1322 | 838  | 33 | 35.95 | 4.98 | 47.09 |
| chr11 | 33092441 | 33093295 | 855  | 590  | 19 | 33.51 | 5.34 | 48.65 |
| chr11 | 33253895 | 33255260 | 1366 | 751  | 26 | 31.29 | 5.75 | 50.33 |
| chr11 | 33377676 | 33378700 | 1025 | 745  | 23 | 31.05 | 5.58 | 50.6  |
| chr11 | 33455188 | 33456146 | 959  | 582  | 20 | 31.9  | 5.75 | 49.83 |
| chr11 | 33856479 | 33857084 | 606  | 278  | 15 | 31.13 | 5.75 | 50.65 |
| chr11 | 34799312 | 34800345 | 1034 | 389  | 23 | 31.76 | 4.57 | 49.86 |
| chr11 | 35197554 | 35198394 | 841  | 244  | 18 | 30.11 | 5.34 | 51.58 |
| chr11 | 35637436 | 35639028 | 1593 | 825  | 40 | 44.74 | 4.05 | 48.86 |
| chr11 | 35660543 | 35661533 | 991  | 552  | 20 | 30.26 | 4.11 | 51.67 |
| chr11 | 36118672 | 36119765 | 1094 | 584  | 25 | 40.91 | 5.75 | 46.35 |
| chr11 | 36515630 | 36516524 | 895  | 357  | 22 | 39.84 | 4.93 | 46.65 |
| chr11 | 36785201 | 36786025 | 825  | 534  | 18 | 30.99 | 4.93 | 50.47 |
| chr11 | 37813235 | 37814098 | 864  | 615  | 19 | 32.99 | 4.11 | 49.23 |
| chr11 | 38074888 | 38076440 | 1553 | 362  | 35 | 52.41 | 4.11 | 50.62 |
| chr11 | 38202890 | 38203926 | 1037 | 268  | 28 | 52.58 | 5.33 | 50.4  |
| chr11 | 38300765 | 38301714 | 950  | 374  | 22 | 36.52 | 6.57 | 46.93 |
| chr11 | 38590739 | 38591836 | 1098 | 446  | 23 | 32.64 | 5.34 | 49.32 |
| chr11 | 39190893 | 39191579 | 687  | 264  | 16 | 30.49 | 4.52 | 51.31 |
| chr11 | 39865731 | 39866786 | 1056 | 384  | 22 | 30.89 | 5.34 | 50.76 |
| chr11 | 39887050 | 39888087 | 1038 | 752  | 21 | 31.78 | 4.11 | 49.85 |
| chr11 | 41192151 | 41192983 | 833  | 416  | 19 | 31.04 | 4.57 | 50.55 |
| chr11 | 41630491 | 41631407 | 917  | 600  | 21 | 38.48 | 4.93 | 46.32 |
| chr11 | 41771830 | 41772718 | 889  | 473  | 19 | 31.59 | 4.93 | 49.94 |
| chr11 | 41835303 | 41836501 | 1199 | 772  | 25 | 35.31 | 6.16 | 47.42 |
| chr11 | 42964887 | 42965744 | 858  | 426  | 19 | 33.33 | 5.75 | 48.66 |
| chr11 | 43147907 | 43148990 | 1084 | 654  | 23 | 33.34 | 4.52 | 48.69 |
| chr11 | 43444055 | 43444968 | 914  | 283  | 20 | 32.17 | 4.72 | 49.93 |
| chr11 | 43449628 | 43450867 | 1240 | 568  | 27 | 36.1  | 4.95 | 47.02 |
| chr11 | 43501267 | 43503170 | 1904 | 604  | 39 | 34.69 | 4.11 | 47.78 |
| chr11 | 43591468 | 43592962 | 1495 | 1234 | 32 | 47.49 | 4.11 | 48.5  |
| chr11 | 43664689 | 43665570 | 882  | 256  | 26 | 54.84 | 5.71 | 54.1  |
| chr11 | 43968409 | 43969537 | 1129 | 601  | 25 | 38.95 | 4.93 | 46.11 |
| chr11 | 44587381 | 44588335 | 955  | 693  | 26 | 39.2  | 4.58 | 46.31 |
| chr11 | 45951746 | 45952955 | 1210 | 582  | 26 | 30.15 | 6.42 | 51.67 |
| chr11 | 45980613 | 45982036 | 1424 | 939  | 36 | 37.72 | 4.81 | 46.56 |
| chr11 | 46104055 | 46105480 | 1426 | 457  | 35 | 43.63 | 4.41 | 47.63 |
| chr11 | 46129488 | 46130334 | 847  | 608  | 21 | 33.98 | 4.19 | 48.59 |
| chr11 | 46621649 | 46622822 | 1174 | 521  | 32 | 52.3  | 5.82 | 51    |
| chr11 | 47334161 | 47335023 | 863  | 593  | 19 | 31.53 | 3.98 | 49.92 |
| chr11 | 47377280 | 47378127 | 848  | 289  | 19 | 30.19 | 4.19 | 51.72 |

|       |          |          |      |      |    |       |      |       |
|-------|----------|----------|------|------|----|-------|------|-------|
| chr11 | 47560095 | 47561255 | 1161 | 554  | 29 | 41.03 | 4.79 | 46.31 |
| chr11 | 47835707 | 47836942 | 1236 | 764  | 33 | 41.51 | 4.71 | 47.22 |
| chr11 | 47898276 | 47899491 | 1216 | 474  | 26 | 35    | 7.39 | 47.63 |
| chr11 | 47955286 | 47957213 | 1928 | 1259 | 39 | 41.3  | 5.65 | 46.92 |
| chr11 | 48317245 | 48317985 | 741  | 426  | 17 | 31.61 | 5.75 | 49.92 |
| chr11 | 48479877 | 48481103 | 1227 | 517  | 29 | 50.2  | 6.16 | 51.31 |
| chr11 | 48762890 | 48763953 | 1064 | 424  | 21 | 30.5  | 6.16 | 51.32 |
| chr11 | 48899584 | 48900483 | 900  | 288  | 25 | 41.12 | 5.09 | 46.37 |
| chr11 | 49118791 | 49119638 | 848  | 469  | 22 | 42.94 | 5.34 | 47.42 |
| chr11 | 49186261 | 49187875 | 1615 | 1098 | 33 | 31.82 | 4.11 | 49.81 |
| chr11 | 50230042 | 50231066 | 1025 | 577  | 21 | 32.44 | 4.11 | 49.56 |
| chr11 | 50686414 | 50687470 | 1057 | 313  | 24 | 36.31 | 5.9  | 47    |
| chr11 | 50779688 | 50780752 | 1065 | 613  | 23 | 34.32 | 5.75 | 47.79 |
| chr11 | 51176992 | 51178298 | 1307 | 445  | 30 | 49.72 | 4.93 | 51.84 |
| chr11 | 51380276 | 51381108 | 833  | 493  | 18 | 30.55 | 4.52 | 51.23 |
| chr11 | 54892141 | 54893372 | 1232 | 525  | 27 | 30.08 | 4.79 | 51.55 |
| chr11 | 54904974 | 54905864 | 891  | 266  | 21 | 40.1  | 6.98 | 46.56 |
| chr11 | 54976587 | 54977982 | 1396 | 532  | 31 | 42.99 | 3.42 | 47.38 |
| chr11 | 55922575 | 55923787 | 1213 | 478  | 24 | 30.93 | 6.98 | 50.58 |
| chr11 | 56222601 | 56223807 | 1207 | 631  | 25 | 34.92 | 4.93 | 47.6  |
| chr11 | 56504197 | 56505250 | 1054 | 568  | 21 | 30.98 | 4.93 | 50.46 |
| chr11 | 58112975 | 58114310 | 1336 | 735  | 29 | 43.95 | 6.16 | 47.74 |
| chr11 | 58129962 | 58130872 | 911  | 621  | 20 | 30.64 | 4.19 | 51.17 |
| chr11 | 58179053 | 58179658 | 606  | 319  | 16 | 35.98 | 5.75 | 47.08 |
| chr11 | 58179738 | 58181027 | 1290 | 524  | 32 | 44.81 | 5.48 | 48.98 |
| chr11 | 58239158 | 58239884 | 727  | 486  | 17 | 32.47 | 5.75 | 49.49 |
| chr11 | 58576351 | 58577147 | 797  | 250  | 18 | 32.61 | 4.11 | 49.4  |
| chr11 | 58638793 | 58640573 | 1781 | 1321 | 36 | 43.96 | 5.69 | 47.83 |
| chr11 | 58790956 | 58791577 | 622  | 210  | 16 | 30.99 | 4.89 | 50.5  |
| chr11 | 59066980 | 59067798 | 819  | 574  | 18 | 31.33 | 4.93 | 50.21 |
| chr11 | 59192402 | 59193299 | 898  | 289  | 23 | 44.23 | 5.75 | 48.23 |
| chr11 | 59255613 | 59256412 | 800  | 339  | 20 | 41.52 | 6.57 | 47.27 |
| chr11 | 59471578 | 59472547 | 970  | 407  | 20 | 31.32 | 4.93 | 50.27 |
| chr11 | 59736119 | 59737188 | 1070 | 527  | 21 | 30.21 | 4.93 | 51.72 |
| chr11 | 59788000 | 59788958 | 959  | 635  | 23 | 40.3  | 5.34 | 46.92 |
| chr11 | 59904591 | 59905324 | 734  | 453  | 17 | 32.04 | 5.75 | 49.74 |
| chr11 | 59991986 | 59992719 | 734  | 461  | 20 | 36.32 | 4.45 | 47.02 |
| chr11 | 60032743 | 60034228 | 1486 | 1015 | 32 | 34.43 | 3.77 | 47.78 |
| chr11 | 60044850 | 60045634 | 785  | 269  | 18 | 33.33 | 4.93 | 48.72 |
| chr11 | 60216360 | 60217627 | 1268 | 746  | 30 | 31.97 | 4.65 | 49.83 |
| chr11 | 60375027 | 60375897 | 871  | 279  | 19 | 32.59 | 5.34 | 49.42 |
| chr11 | 60379087 | 60380053 | 967  | 396  | 21 | 34.5  | 4.03 | 47.67 |
| chr11 | 60865740 | 60866395 | 656  | 410  | 16 | 32.47 | 5.34 | 49.5  |
| chr11 | 62585558 | 62586500 | 943  | 499  | 21 | 36.92 | 6.57 | 46.83 |
| chr11 | 62591640 | 62592377 | 738  | 494  | 17 | 31.79 | 3.7  | 49.81 |
| chr11 | 62606677 | 62608248 | 1572 | 939  | 38 | 39.24 | 4.36 | 46.46 |
| chr11 | 62811480 | 62812490 | 1011 | 342  | 25 | 45.97 | 6.57 | 49.65 |
| chr11 | 63420565 | 63421515 | 951  | 444  | 26 | 49.54 | 7.99 | 51.28 |
| chr11 | 63438299 | 63440028 | 1730 | 1199 | 35 | 37.61 | 4.57 | 45.73 |
| chr11 | 64343837 | 64344683 | 847  | 380  | 20 | 38.39 | 5.75 | 46.28 |
| chr11 | 64656450 | 64657230 | 781  | 281  | 18 | 33.58 | 4.52 | 48.63 |
| chr11 | 64971774 | 64972821 | 1048 | 552  | 21 | 31.28 | 5.34 | 50.39 |

|       |          |          |      |      |    |       |      |       |
|-------|----------|----------|------|------|----|-------|------|-------|
| chr11 | 65045159 | 65045939 | 781  | 257  | 18 | 33.58 | 4.52 | 48.63 |
| chr11 | 65547335 | 65548694 | 1360 | 508  | 36 | 56.19 | 5.02 | 53.7  |
| chr11 | 65755594 | 65757114 | 1521 | 1275 | 33 | 38.71 | 5.96 | 46.22 |
| chr11 | 66440071 | 66441735 | 1665 | 519  | 31 | 30.21 | 3.97 | 51.74 |
| chr11 | 67084974 | 67086534 | 1561 | 674  | 47 | 31.84 | 4.49 | 49.75 |
| chr11 | 67092446 | 67094185 | 1740 | 631  | 30 | 39.52 | 4.11 | 46.94 |
| chr11 | 67452938 | 67454261 | 1324 | 565  | 30 | 48.73 | 6.98 | 50.37 |
| chr11 | 68737811 | 68738652 | 842  | 493  | 18 | 30.05 | 5.34 | 51.39 |
| chr11 | 69375428 | 69376164 | 737  | 279  | 18 | 36.39 | 6.57 | 47.16 |
| chr11 | 69713487 | 69714324 | 838  | 563  | 18 | 30.27 | 4.93 | 51.68 |
| chr11 | 71892251 | 71893380 | 1130 | 587  | 23 | 31.1  | 5.75 | 50.62 |
| chr11 | 73148785 | 73149733 | 949  | 221  | 21 | 36.57 | 4.52 | 46.89 |
| chr11 | 73273293 | 73274212 | 920  | 329  | 20 | 30.15 | 4.57 | 51.67 |
| chr11 | 73427764 | 73429130 | 1367 | 831  | 35 | 54.92 | 4.47 | 53.61 |
| chr11 | 73620815 | 73621783 | 969  | 679  | 21 | 31.38 | 3.81 | 50.22 |
| chr11 | 74167048 | 74167808 | 761  | 357  | 19 | 39.47 | 6.16 | 47.04 |
| chr11 | 74468086 | 74468960 | 875  | 595  | 21 | 41.13 | 6.16 | 46.39 |
| chr11 | 74779547 | 74780993 | 1447 | 813  | 34 | 54.27 | 6.98 | 54.23 |
| chr11 | 75185912 | 75187718 | 1807 | 504  | 47 | 37.14 | 4.48 | 46.95 |
| chr11 | 75259134 | 75259899 | 766  | 211  | 17 | 30.13 | 3.7  | 51.65 |
| chr11 | 75272689 | 75273571 | 883  | 622  | 19 | 31.92 | 5.34 | 49.72 |
| chr11 | 75678060 | 75679067 | 1008 | 413  | 23 | 33.75 | 5.77 | 48.68 |
| chr11 | 75937640 | 75938404 | 765  | 516  | 17 | 30.19 | 5.34 | 51.7  |
| chr11 | 77565524 | 77566648 | 1125 | 567  | 23 | 31.34 | 5.34 | 50.19 |
| chr11 | 77756894 | 77757767 | 874  | 523  | 19 | 32.42 | 5.75 | 49.55 |
| chr11 | 78054408 | 78056463 | 2056 | 265  | 45 | 61.49 | 5.34 | 54    |
| chr11 | 78838958 | 78840419 | 1462 | 1058 | 32 | 42.45 | 3.76 | 47.4  |
| chr11 | 79216032 | 79217070 | 1039 | 698  | 22 | 31.73 | 5.75 | 49.74 |
| chr11 | 79299334 | 79300293 | 960  | 633  | 20 | 31.84 | 4.11 | 49.73 |
| chr11 | 79303348 | 79304460 | 1113 | 648  | 28 | 47.4  | 5.71 | 48.34 |
| chr11 | 79384833 | 79385765 | 933  | 441  | 25 | 46.22 | 6.09 | 48.66 |
| chr11 | 79454201 | 79455586 | 1386 | 741  | 30 | 31.98 | 3.73 | 49.85 |
| chr11 | 79463397 | 79464948 | 1552 | 902  | 35 | 30.35 | 3.39 | 51.61 |
| chr11 | 79514849 | 79515819 | 971  | 267  | 25 | 48.64 | 5.34 | 49.84 |
| chr11 | 79533005 | 79534308 | 1304 | 706  | 25 | 30.47 | 6.57 | 51.25 |
| chr11 | 79696707 | 79698713 | 2007 | 839  | 42 | 31.49 | 3.74 | 49.91 |
| chr11 | 79897702 | 79899161 | 1460 | 840  | 35 | 53.08 | 6.62 | 51.67 |
| chr11 | 79964727 | 79966229 | 1503 | 290  | 33 | 41.21 | 4.19 | 46.72 |
| chr11 | 80012186 | 80013732 | 1547 | 1275 | 32 | 44.82 | 4.52 | 48.91 |
| chr11 | 80478222 | 80480060 | 1839 | 1297 | 34 | 35.46 | 4.93 | 47.41 |
| chr11 | 80488580 | 80489284 | 705  | 484  | 19 | 41.26 | 6.69 | 46.89 |
| chr11 | 80497218 | 80498787 | 1570 | 1179 | 32 | 32.75 | 4.59 | 49.36 |
| chr11 | 81045800 | 81047419 | 1620 | 606  | 31 | 35.76 | 4.57 | 47.11 |
| chr11 | 81273197 | 81274004 | 808  | 403  | 21 | 30.4  | 4.05 | 51.48 |
| chr11 | 81274010 | 81275627 | 1618 | 1352 | 31 | 36.64 | 4.62 | 47.02 |
| chr11 | 81486018 | 81487233 | 1216 | 755  | 31 | 49.4  | 4.69 | 51.37 |
| chr11 | 81535073 | 81536461 | 1389 | 428  | 37 | 32.83 | 3.69 | 49.43 |
| chr11 | 81600283 | 81601366 | 1084 | 282  | 26 | 35.44 | 4.89 | 47.42 |
| chr11 | 81662237 | 81663897 | 1661 | 1353 | 40 | 42.7  | 5.39 | 47.48 |
| chr11 | 81729247 | 81730704 | 1458 | 971  | 33 | 43.5  | 4.95 | 48.15 |
| chr11 | 81749706 | 81751605 | 1900 | 1086 | 47 | 54.92 | 5.98 | 53.5  |
| chr11 | 81769332 | 81770721 | 1390 | 584  | 31 | 30.6  | 4.44 | 51.25 |

|       |          |          |      |      |     |       |      |       |
|-------|----------|----------|------|------|-----|-------|------|-------|
| chr11 | 81889176 | 81890414 | 1239 | 673  | 30  | 33.72 | 4.36 | 48.64 |
| chr11 | 82054627 | 82056263 | 1637 | 824  | 41  | 36.63 | 4.2  | 46.98 |
| chr11 | 82068500 | 82069747 | 1248 | 764  | 29  | 30.03 | 4.67 | 51.49 |
| chr11 | 82118654 | 82120972 | 2319 | 829  | 45  | 41.98 | 4.57 | 47.14 |
| chr11 | 82225406 | 82226921 | 1516 | 1030 | 31  | 34.04 | 4.37 | 48.53 |
| chr11 | 82537224 | 82539284 | 2061 | 1198 | 53  | 42.82 | 4.28 | 47.42 |
| chr11 | 82569873 | 82573477 | 3605 | 3244 | 89  | 30.27 | 3.31 | 51.65 |
| chr11 | 82855604 | 82859690 | 4087 | 2092 | 108 | 50.15 | 4.34 | 51.44 |
| chr11 | 82951070 | 82952877 | 1808 | 1065 | 51  | 41.33 | 4.16 | 46.88 |
| chr11 | 83079108 | 83081078 | 1971 | 614  | 41  | 40.91 | 5.82 | 46.39 |
| chr11 | 83138225 | 83139404 | 1180 | 564  | 26  | 32.84 | 4.74 | 49.37 |
| chr11 | 83148846 | 83150149 | 1304 | 677  | 35  | 53.54 | 4.54 | 52.02 |
| chr11 | 83220096 | 83221596 | 1501 | 897  | 31  | 33.3  | 3.57 | 48.82 |
| chr11 | 83395458 | 83399042 | 3585 | 2894 | 84  | 30.24 | 3.45 | 51.73 |
| chr11 | 83576586 | 83578276 | 1691 | 654  | 36  | 36.93 | 3.53 | 46.86 |
| chr11 | 83634945 | 83636695 | 1751 | 396  | 40  | 31.23 | 4.06 | 50.5  |
| chr11 | 83674318 | 83675170 | 853  | 640  | 20  | 35.74 | 4.33 | 47.12 |
| chr11 | 83915044 | 83916865 | 1822 | 1060 | 44  | 37.12 | 5.27 | 46.93 |
| chr11 | 84005126 | 84006457 | 1332 | 744  | 31  | 34.67 | 6.46 | 47.78 |
| chr11 | 84467066 | 84470474 | 3409 | 2572 | 89  | 40.63 | 3.63 | 46.72 |
| chr11 | 84812470 | 84816279 | 3810 | 2568 | 108 | 41.41 | 4.83 | 47    |
| chr11 | 84913278 | 84919165 | 5888 | 5160 | 157 | 34.02 | 4.4  | 48.59 |
| chr11 | 84933942 | 84939822 | 5881 | 5258 | 149 | 43.66 | 4.07 | 47.91 |
| chr11 | 85021377 | 85025658 | 4282 | 1783 | 122 | 40.04 | 3.09 | 46.61 |
| chr11 | 85199101 | 85204443 | 5343 | 4082 | 150 | 49.33 | 3.94 | 51.19 |
| chr11 | 85276460 | 85280175 | 3716 | 2887 | 104 | 33.05 | 3.08 | 49.09 |
| chr11 | 85878612 | 85881547 | 2936 | 658  | 104 | 49.99 | 3.41 | 51.64 |
| chr11 | 86342795 | 86345090 | 2296 | 1590 | 67  | 34.77 | 4.15 | 47.61 |
| chr11 | 86680226 | 86683088 | 2863 | 464  | 93  | 34.41 | 2.74 | 47.76 |
| chr11 | 86778924 | 86787069 | 8146 | 3808 | 269 | 61.47 | 3.33 | 54.18 |
| chr11 | 87241215 | 87244377 | 3163 | 896  | 85  | 30.16 | 3.44 | 51.69 |
| chr11 | 87255735 | 87259044 | 3310 | 2021 | 88  | 35.73 | 3.45 | 47.17 |
| chr11 | 87497579 | 87499843 | 2265 | 1421 | 71  | 30.78 | 4.37 | 50.98 |
| chr11 | 87624123 | 87626512 | 2390 | 1839 | 82  | 43.75 | 3.05 | 47.89 |
| chr11 | 87783321 | 87785433 | 2113 | 626  | 61  | 41.14 | 4.52 | 46.38 |
| chr11 | 87949404 | 87953331 | 3928 | 760  | 99  | 35.19 | 3.97 | 47.15 |
| chr11 | 88227959 | 88232361 | 4403 | 2642 | 117 | 35.61 | 3.22 | 47.31 |
| chr11 | 88237817 | 88239729 | 1913 | 1367 | 63  | 38.12 | 3.61 | 46.32 |
| chr11 | 88247729 | 88252959 | 5231 | 4541 | 140 | 31.35 | 3.42 | 50.23 |
| chr11 | 88261368 | 88266019 | 4652 | 285  | 152 | 33.4  | 2.65 | 48.72 |
| chr11 | 88464609 | 88468458 | 3850 | 494  | 107 | 34.34 | 3.88 | 47.9  |
| chr11 | 88504141 | 88508688 | 4548 | 2141 | 119 | 32.5  | 3.22 | 49.42 |
| chr11 | 88515882 | 88518116 | 2235 | 776  | 63  | 35.45 | 3.47 | 47.41 |
| chr11 | 88532863 | 88536312 | 3450 | 2753 | 86  | 39.11 | 4.76 | 46.28 |
| chr11 | 88705286 | 88706943 | 1658 | 950  | 51  | 30.82 | 3.81 | 50.96 |
| chr11 | 88756756 | 88760265 | 3510 | 634  | 94  | 38.87 | 4.07 | 46.23 |
| chr11 | 88899273 | 88902859 | 3587 | 1732 | 101 | 31.2  | 3.23 | 50.55 |
| chr11 | 88915654 | 88918730 | 3077 | 512  | 85  | 32.69 | 2.82 | 49.39 |
| chr11 | 88945383 | 88950855 | 5473 | 3633 | 146 | 32.65 | 3.42 | 49.36 |
| chr11 | 88995873 | 88998918 | 3046 | 834  | 92  | 38.2  | 4.19 | 46.44 |
| chr11 | 89155165 | 89157387 | 2223 | 1594 | 68  | 40.66 | 3.74 | 46.6  |
| chr11 | 89336327 | 89340526 | 4200 | 3639 | 104 | 41.87 | 3.93 | 47.11 |



|       |          |          |      |      |     |       |      |       |
|-------|----------|----------|------|------|-----|-------|------|-------|
| chr11 | 89694588 | 89695788 | 1201 | 493  | 27  | 31.59 | 5.48 | 50.01 |
| chr11 | 89705394 | 89706172 | 779  | 276  | 18  | 33.7  | 5.75 | 48.57 |
| chr11 | 89718556 | 89721388 | 2833 | 2101 | 66  | 41.68 | 3.62 | 47.18 |
| chr11 | 89754467 | 89758930 | 4464 | 3091 | 117 | 30.33 | 3.74 | 51.57 |
| chr11 | 89841810 | 89844235 | 2426 | 538  | 70  | 32.12 | 3.83 | 49.78 |
| chr11 | 89922181 | 89924405 | 2225 | 1341 | 71  | 30.98 | 4.12 | 50.45 |
| chr11 | 90040288 | 90041883 | 1596 | 818  | 47  | 30.02 | 4.07 | 51.52 |
| chr11 | 90101931 | 90107111 | 5181 | 1133 | 133 | 31.38 | 3.79 | 50.19 |
| chr11 | 90128014 | 90131010 | 2997 | 2444 | 83  | 30.07 | 4.36 | 51.46 |
| chr11 | 90202058 | 90205922 | 3865 | 1939 | 112 | 46.94 | 4.23 | 47.62 |
| chr11 | 90208168 | 90210592 | 2425 | 1506 | 77  | 50.33 | 3.97 | 51.91 |
| chr11 | 90405372 | 90408145 | 2774 | 644  | 75  | 50.99 | 3.91 | 51.7  |
| chr11 | 90821443 | 90824378 | 2936 | 1689 | 89  | 49.19 | 3.74 | 50.84 |
| chr11 | 91003630 | 91006489 | 2860 | 2273 | 85  | 50.43 | 4.71 | 52.06 |
| chr11 | 91006682 | 91012359 | 5678 | 3839 | 144 | 49.36 | 3.25 | 51.43 |
| chr11 | 91058359 | 91061364 | 3006 | 1365 | 78  | 48.11 | 4.25 | 49.27 |
| chr11 | 91119902 | 91122582 | 2681 | 1410 | 76  | 39.79 | 3.9  | 46.63 |
| chr11 | 91147414 | 91150950 | 3537 | 2712 | 95  | 36.43 | 3.13 | 47.16 |
| chr11 | 91309634 | 91311031 | 1398 | 460  | 38  | 35.32 | 3.95 | 47.39 |
| chr11 | 91392382 | 91395358 | 2977 | 1658 | 77  | 31.92 | 3.09 | 49.8  |
| chr11 | 91410345 | 91413683 | 3339 | 1796 | 86  | 43.45 | 3.57 | 48.02 |
| chr11 | 91485029 | 91487501 | 2473 | 1461 | 64  | 36.12 | 3.31 | 46.97 |
| chr11 | 91683470 | 91687316 | 3847 | 3155 | 102 | 31.21 | 3.22 | 50.57 |
| chr11 | 91918114 | 91921311 | 3198 | 2517 | 90  | 36.97 | 4.08 | 46.96 |
| chr11 | 91961514 | 91963480 | 1967 | 1388 | 48  | 34.4  | 4.04 | 47.76 |
| chr11 | 92095056 | 92098027 | 2972 | 2260 | 82  | 42.73 | 3.32 | 47.4  |
| chr11 | 92457421 | 92459488 | 2068 | 831  | 58  | 49.86 | 4.12 | 51.87 |
| chr11 | 92773432 | 92774556 | 1125 | 260  | 32  | 40.13 | 4.49 | 46.68 |
| chr11 | 93015504 | 93018325 | 2822 | 2351 | 75  | 47.74 | 3.64 | 49.25 |
| chr11 | 93024558 | 93027887 | 3330 | 1711 | 83  | 35.22 | 3.91 | 47.21 |
| chr11 | 93149980 | 93154117 | 4138 | 716  | 96  | 54.71 | 4.09 | 54.36 |
| chr11 | 93546029 | 93548387 | 2359 | 1282 | 68  | 38.83 | 4.12 | 46.2  |
| chr11 | 93802155 | 93804231 | 2077 | 615  | 61  | 37.1  | 3.21 | 46.95 |
| chr11 | 94048092 | 94050199 | 2108 | 753  | 55  | 31.14 | 4.02 | 50.63 |
| chr11 | 94096629 | 94099467 | 2839 | 797  | 93  | 58.56 | 4.41 | 54.12 |
| chr11 | 94344093 | 94348382 | 4290 | 985  | 127 | 35.6  | 3.35 | 47.2  |
| chr11 | 94622715 | 94627254 | 4540 | 1934 | 126 | 42.6  | 4.78 | 47.38 |
| chr11 | 95085777 | 95090268 | 4492 | 1905 | 129 | 37.56 | 3.18 | 45.96 |
| chr11 | 95157735 | 95162917 | 5183 | 1399 | 128 | 32.38 | 3.13 | 49.74 |
| chr11 | 95338351 | 95340683 | 2333 | 856  | 75  | 47.05 | 3.6  | 47.51 |
| chr11 | 95561130 | 95567906 | 6777 | 3562 | 224 | 39.87 | 3.14 | 46.7  |
| chr11 | 95796290 | 95799229 | 2940 | 792  | 87  | 39.63 | 3.81 | 46.64 |
| chr11 | 95943610 | 95946737 | 3128 | 985  | 92  | 31.97 | 3.91 | 49.82 |
| chr11 | 96456812 | 96458965 | 2154 | 831  | 62  | 31.36 | 3.69 | 50.21 |
| chr11 | 96489546 | 96493719 | 4174 | 1559 | 119 | 61.7  | 4.18 | 53.66 |
| chr11 | 96493749 | 96496152 | 2404 | 1607 | 62  | 37.41 | 3.16 | 46.59 |
| chr11 | 96517798 | 96520793 | 2996 | 769  | 83  | 49.16 | 3.68 | 50.78 |
| chr11 | 96674142 | 96679515 | 5374 | 631  | 153 | 43.61 | 4.05 | 47.64 |
| chr11 | 96801504 | 96805048 | 3545 | 2116 | 101 | 49.85 | 3.42 | 51.81 |
| chr11 | 96909527 | 96911681 | 2155 | 1057 | 65  | 45.54 | 4.92 | 50.07 |
| chr11 | 96994107 | 96996346 | 2240 | 1632 | 66  | 52.69 | 4.1  | 50.56 |
| chr11 | 97233363 | 97235853 | 2491 | 1908 | 64  | 51.51 | 5.44 | 51.72 |

|       |           |           |      |      |     |       |      |       |
|-------|-----------|-----------|------|------|-----|-------|------|-------|
| chr11 | 97235869  | 97237155  | 1287 | 262  | 36  | 34.88 | 4.18 | 47.63 |
| chr11 | 97306234  | 97309586  | 3353 | 1530 | 96  | 42.44 | 3.47 | 47.33 |
| chr11 | 97314677  | 97316731  | 2055 | 1089 | 70  | 46.63 | 4.26 | 47.3  |
| chr11 | 97342685  | 97351187  | 8503 | 4514 | 226 | 68.73 | 3.63 | 57.14 |
| chr11 | 97382034  | 97384942  | 2909 | 1350 | 73  | 37.52 | 4.07 | 45.94 |
| chr11 | 97446541  | 97449240  | 2700 | 2043 | 70  | 32.64 | 4.06 | 49.35 |
| chr11 | 97470338  | 97473811  | 3474 | 1991 | 99  | 38.82 | 3.81 | 46.21 |
| chr11 | 97530990  | 97532729  | 1740 | 1214 | 57  | 54.46 | 4.4  | 54.03 |
| chr11 | 97684323  | 97688381  | 4059 | 1454 | 110 | 35.68 | 3.02 | 47.21 |
| chr11 | 97698577  | 97700528  | 1952 | 1129 | 57  | 35.63 | 3.93 | 47.32 |
| chr11 | 97801578  | 97804839  | 3262 | 1195 | 105 | 48.5  | 4.26 | 49.49 |
| chr11 | 97857808  | 97862004  | 4197 | 2733 | 112 | 33.47 | 3    | 48.6  |
| chr11 | 97911629  | 97915235  | 3607 | 1994 | 116 | 68.42 | 3.83 | 55.3  |
| chr11 | 98004114  | 98006807  | 2694 | 847  | 79  | 36.81 | 3.63 | 46.81 |
| chr11 | 98062267  | 98064557  | 2291 | 736  | 66  | 31    | 4.28 | 50.54 |
| chr11 | 98094329  | 98097882  | 3554 | 2322 | 96  | 32.9  | 3.42 | 49.34 |
| chr11 | 98131893  | 98136864  | 4972 | 1520 | 148 | 41.96 | 3.05 | 47.08 |
| chr11 | 98142542  | 98144668  | 2127 | 1051 | 61  | 34.65 | 4.07 | 47.68 |
| chr11 | 98150886  | 98156538  | 5653 | 573  | 146 | 48.31 | 3.62 | 49.5  |
| chr11 | 98244142  | 98245430  | 1289 | 939  | 35  | 32.82 | 5.04 | 49.43 |
| chr11 | 98391427  | 98393281  | 1855 | 993  | 53  | 33.78 | 3.51 | 48.67 |
| chr11 | 98613648  | 98615422  | 1775 | 498  | 47  | 31.67 | 3.4  | 49.84 |
| chr11 | 98792080  | 98798585  | 6506 | 4232 | 180 | 43.9  | 3.53 | 47.82 |
| chr11 | 98873249  | 98876743  | 3495 | 1883 | 80  | 37.34 | 5.07 | 46.82 |
| chr11 | 98908835  | 98913430  | 4596 | 3384 | 127 | 61.55 | 3.54 | 53.01 |
| chr11 | 98916896  | 98920774  | 3879 | 3161 | 99  | 37.44 | 3.32 | 46.36 |
| chr11 | 98921262  | 98923418  | 2157 | 1422 | 58  | 44.3  | 4.6  | 48.22 |
| chr11 | 99094119  | 99096047  | 1929 | 583  | 65  | 44.81 | 4.58 | 48.88 |
| chr11 | 99119377  | 99124333  | 4957 | 1521 | 131 | 38.41 | 3.02 | 46.37 |
| chr11 | 99210755  | 99214289  | 3535 | 1419 | 100 | 52.15 | 3.51 | 51.05 |
| chr11 | 99263141  | 99268077  | 4937 | 2905 | 127 | 34.17 | 4.23 | 48.02 |
| chr11 | 99269433  | 99271353  | 1921 | 473  | 51  | 31.76 | 3.52 | 49.88 |
| chr11 | 99307666  | 99310080  | 2415 | 1561 | 71  | 34.85 | 4.24 | 47.59 |
| chr11 | 99469564  | 99473202  | 3639 | 1581 | 91  | 33.57 | 3.78 | 48.63 |
| chr11 | 99484124  | 99486324  | 2201 | 633  | 59  | 34.39 | 4.17 | 47.77 |
| chr11 | 99520954  | 99525435  | 4482 | 1208 | 122 | 31.03 | 3.42 | 50.47 |
| chr11 | 99580422  | 99582352  | 1931 | 1277 | 64  | 49.66 | 3.94 | 51.29 |
| chr11 | 99635707  | 99639136  | 3430 | 2374 | 100 | 39.27 | 4.11 | 46.39 |
| chr11 | 99775130  | 99779549  | 4420 | 1713 | 110 | 36.72 | 4.2  | 46.99 |
| chr11 | 99809600  | 99812651  | 3052 | 277  | 85  | 38.28 | 2.93 | 46.27 |
| chr11 | 100066131 | 100067884 | 1754 | 290  | 53  | 40.42 | 4.23 | 46.86 |
| chr11 | 100162441 | 100165728 | 3288 | 2501 | 96  | 34.86 | 3.41 | 47.65 |
| chr11 | 100256592 | 100260158 | 3567 | 1752 | 97  | 53.29 | 3.64 | 51.7  |
| chr11 | 100285558 | 100287999 | 2442 | 1116 | 55  | 32.74 | 4.18 | 49.35 |
| chr11 | 100330871 | 100334192 | 3322 | 610  | 87  | 38.2  | 3.13 | 46.42 |
| chr11 | 100334649 | 100339734 | 5086 | 1580 | 136 | 43.64 | 4.1  | 47.77 |
| chr11 | 100446028 | 100448203 | 2176 | 987  | 71  | 33.93 | 4.15 | 48.72 |
| chr11 | 100815680 | 100816958 | 1279 | 559  | 42  | 37.15 | 5.32 | 46.92 |
| chr11 | 100817727 | 100823357 | 5631 | 1472 | 160 | 53.82 | 3.5  | 52.26 |
| chr11 | 101013220 | 101016274 | 3055 | 1313 | 79  | 32.17 | 3.51 | 49.93 |
| chr11 | 101017944 | 101023234 | 5291 | 2468 | 146 | 48.84 | 4.03 | 50.53 |
| chr11 | 101041225 | 101045461 | 4237 | 2468 | 105 | 44.33 | 3.88 | 48.31 |

|       |           |           |      |      |     |       |      |       |
|-------|-----------|-----------|------|------|-----|-------|------|-------|
| chr11 | 101430784 | 101434423 | 3640 | 2829 | 84  | 37.51 | 3.27 | 46    |
| chr11 | 101627268 | 101630166 | 2899 | 2071 | 83  | 36.05 | 3.83 | 46.95 |
| chr11 | 101805865 | 101815813 | 9949 | 4249 | 278 | 30.84 | 2.78 | 50.84 |
| chr11 | 102131810 | 102135594 | 3785 | 3123 | 97  | 31.03 | 3.17 | 50.52 |
| chr11 | 102269278 | 102275374 | 6097 | 1109 | 220 | 32.26 | 3.45 | 50.08 |
| chr11 | 103125356 | 103130250 | 4895 | 3353 | 145 | 32.25 | 2.91 | 50.01 |
| chr11 | 103437920 | 103440659 | 2740 | 1258 | 80  | 30.83 | 3.83 | 50.86 |
| chr11 | 103575091 | 103581991 | 6901 | 3375 | 216 | 78.34 | 4.99 | 58.06 |
| chr11 | 103598134 | 103602791 | 4658 | 732  | 125 | 47.75 | 3.62 | 49.2  |
| chr11 | 103604783 | 103608383 | 3601 | 2873 | 129 | 35.68 | 3.26 | 47.2  |
| chr11 | 104054711 | 104061662 | 6952 | 3382 | 210 | 77.77 | 3.59 | 57.58 |
| chr11 | 104633364 | 104639699 | 6336 | 4748 | 204 | 88.73 | 4.49 | 38.24 |
| chr11 | 104748008 | 104756353 | 8346 | 4538 | 260 | 65.6  | 3.08 | 53.49 |
| chr11 | 104756413 | 104759825 | 3413 | 2098 | 110 | 57.07 | 3.68 | 52.88 |
| chr11 | 105004090 | 105005471 | 1382 | 576  | 40  | 31.49 | 3.91 | 49.92 |
| chr11 | 105186791 | 105189255 | 2465 | 1656 | 73  | 40.92 | 4.39 | 46.48 |
| chr11 | 105252125 | 105261395 | 9271 | 1997 | 273 | 49.21 | 5.14 | 50.9  |
| chr11 | 105461975 | 105467155 | 5181 | 2081 | 149 | 33.59 | 3.88 | 48.73 |
| chr11 | 105490442 | 105493731 | 3290 | 1952 | 92  | 38.73 | 3.92 | 46.21 |
| chr11 | 105542960 | 105547049 | 4090 | 2612 | 107 | 34.58 | 3.67 | 47.72 |
| chr11 | 105574297 | 105576214 | 1918 | 1120 | 53  | 32.5  | 3.36 | 49.42 |
| chr11 | 105577008 | 105582327 | 5320 | 520  | 133 | 44.39 | 3.29 | 48.55 |
| chr11 | 105780922 | 105784761 | 3840 | 827  | 111 | 35.57 | 3.58 | 47.15 |
| chr11 | 105918119 | 105920781 | 2663 | 1654 | 78  | 30.25 | 3.83 | 51.68 |
| chr11 | 106138688 | 106141557 | 2870 | 2197 | 76  | 37.84 | 3.88 | 46.81 |
| chr11 | 106229390 | 106231789 | 2400 | 1562 | 77  | 52.61 | 4.62 | 50.24 |
| chr11 | 106280136 | 106287998 | 7863 | 5369 | 205 | 62.26 | 4.38 | 54.47 |
| chr11 | 106337896 | 106340691 | 2796 | 1015 | 76  | 37.98 | 3.79 | 46.39 |
| chr11 | 106363742 | 106367673 | 3932 | 1020 | 109 | 36.05 | 3.96 | 46.96 |
| chr11 | 106505729 | 106507609 | 1881 | 1144 | 53  | 33.69 | 4.45 | 48.61 |
| chr11 | 106791496 | 106793371 | 1876 | 814  | 58  | 40.31 | 4.93 | 46.86 |
| chr11 | 107055860 | 107059904 | 4045 | 3252 | 111 | 43.42 | 4.63 | 47.86 |
| chr11 | 108244314 | 108248781 | 4468 | 1476 | 130 | 42.87 | 3.61 | 47.3  |
| chr11 | 108746395 | 108750876 | 4482 | 659  | 136 | 35.83 | 3.62 | 47.04 |
| chr11 | 109122311 | 109125797 | 3487 | 498  | 96  | 33.84 | 3.98 | 48.75 |
| chr11 | 109315035 | 109316851 | 1817 | 1045 | 56  | 31.95 | 5.21 | 49.76 |
| chr11 | 109462696 | 109466427 | 3732 | 794  | 115 | 72.54 | 5.6  | 58.24 |
| chr11 | 109471083 | 109473788 | 2706 | 976  | 69  | 31.75 | 3.88 | 49.8  |
| chr11 | 109524874 | 109527587 | 2714 | 717  | 74  | 30.02 | 3.28 | 51.48 |
| chr11 | 109626369 | 109628483 | 2115 | 664  | 59  | 31.91 | 3.9  | 49.84 |
| chr11 | 110538609 | 110541618 | 3010 | 2159 | 82  | 31.08 | 4.28 | 50.75 |
| chr11 | 110712591 | 110721392 | 8802 | 5721 | 263 | 71.95 | 5.27 | 58.33 |
| chr11 | 110724259 | 110730342 | 6084 | 4416 | 160 | 44.96 | 3.83 | 48.86 |
| chr11 | 110759354 | 110761380 | 2027 | 1283 | 60  | 62.33 | 4.25 | 55.17 |
| chr11 | 110761740 | 110766058 | 4319 | 1251 | 113 | 48.2  | 3.59 | 49.51 |
| chr11 | 119614203 | 119615335 | 1133 | 567  | 34  | 76.35 | 11.5 | 54.79 |
| chr11 | 120240985 | 120241863 | 879  | 654  | 20  | 36.4  | 6.16 | 47.15 |
| chr12 | 94962     | 95899     | 938  | 509  | 216 | 312.7 | 7.94 | 20    |
| chr12 | 419576    | 420399    | 824  | 562  | 18  | 30.16 | 4.43 | 51.7  |
| chr12 | 782127    | 783518    | 1392 | 612  | 33  | 33.63 | 4.76 | 48.76 |
| chr12 | 1256231   | 1257539   | 1309 | 591  | 29  | 40.01 | 6.85 | 46.53 |
| chr12 | 1407949   | 1409883   | 1935 | 657  | 45  | 40.2  | 4.36 | 46.67 |

|       |          |          |      |      |    |       |      |       |
|-------|----------|----------|------|------|----|-------|------|-------|
| chr12 | 1762849  | 1763688  | 840  | 243  | 19 | 34.39 | 4.11 | 47.73 |
| chr12 | 2064233  | 2066285  | 2053 | 1383 | 45 | 37.84 | 4.36 | 46.7  |
| chr12 | 2129109  | 2129788  | 680  | 345  | 20 | 50.88 | 6.57 | 51.62 |
| chr12 | 2534769  | 2535662  | 894  | 639  | 19 | 31.32 | 4.52 | 50.32 |
| chr12 | 2999786  | 3001443  | 1658 | 1025 | 38 | 48.92 | 5.16 | 50.38 |
| chr12 | 4096489  | 4097768  | 1280 | 555  | 27 | 38.97 | 5.34 | 46.06 |
| chr12 | 4470954  | 4472012  | 1059 | 574  | 23 | 32.3  | 4.72 | 50.1  |
| chr12 | 4914795  | 4915576  | 782  | 273  | 19 | 38.04 | 5.34 | 46.37 |
| chr12 | 4937399  | 4938259  | 861  | 439  | 21 | 37.73 | 4.95 | 46.58 |
| chr12 | 5396812  | 5397717  | 906  | 218  | 19 | 30.68 | 4.11 | 51.01 |
| chr12 | 5405494  | 5406779  | 1286 | 612  | 27 | 38.66 | 4.93 | 46.07 |
| chr12 | 6595518  | 6596413  | 896  | 632  | 19 | 31.21 | 4.52 | 50.51 |
| chr12 | 6807823  | 6808775  | 953  | 345  | 21 | 36.34 | 6.16 | 47.04 |
| chr12 | 6856745  | 6857614  | 870  | 580  | 19 | 30.58 | 5.12 | 51.22 |
| chr12 | 7061088  | 7062439  | 1352 | 1040 | 38 | 32.24 | 4.65 | 50.06 |
| chr12 | 7998408  | 7999265  | 858  | 605  | 19 | 33.33 | 5.34 | 48.66 |
| chr12 | 8019462  | 8020304  | 843  | 584  | 19 | 34.21 | 6.57 | 47.87 |
| chr12 | 8372797  | 8373863  | 1067 | 391  | 21 | 30.35 | 4.52 | 51.61 |
| chr12 | 8692368  | 8693137  | 770  | 278  | 18 | 32.23 | 4.72 | 50.01 |
| chr12 | 9114736  | 9116211  | 1476 | 682  | 32 | 44.28 | 5.06 | 48.25 |
| chr12 | 9300112  | 9301247  | 1136 | 601  | 23 | 30.82 | 6.16 | 50.95 |
| chr12 | 9702102  | 9703232  | 1131 | 554  | 23 | 31.05 | 5.34 | 50.68 |
| chr12 | 9943097  | 9944757  | 1661 | 1069 | 33 | 31.79 | 4.79 | 49.85 |
| chr12 | 10150498 | 10151020 | 523  | 261  | 15 | 39.16 | 5.71 | 46.24 |
| chr12 | 10451290 | 10452236 | 947  | 400  | 21 | 36.69 | 6.57 | 46.9  |
| chr12 | 10474579 | 10476076 | 1498 | 567  | 32 | 47.33 | 4.11 | 48.18 |
| chr12 | 10732599 | 10733916 | 1318 | 823  | 28 | 40.93 | 5.75 | 46.5  |
| chr12 | 12015591 | 12017818 | 2228 | 1014 | 56 | 35.01 | 3.81 | 47.56 |
| chr12 | 12018602 | 12021536 | 2935 | 1514 | 76 | 35.22 | 4.11 | 47.2  |
| chr12 | 12022052 | 12024188 | 2137 | 524  | 60 | 45.98 | 3.91 | 49.73 |
| chr12 | 12028049 | 12031375 | 3327 | 812  | 87 | 30.76 | 3.38 | 50.95 |
| chr12 | 12052805 | 12053716 | 912  | 297  | 20 | 34.47 | 4.11 | 47.74 |
| chr12 | 12276316 | 12277885 | 1570 | 270  | 32 | 43.69 | 4.93 | 47.96 |
| chr12 | 12648157 | 12648888 | 732  | 482  | 18 | 36.73 | 4.93 | 47.04 |
| chr12 | 12838439 | 12839510 | 1072 | 783  | 23 | 33.95 | 4.52 | 48.66 |
| chr12 | 13183020 | 13183854 | 835  | 261  | 18 | 30.44 | 4.11 | 51.32 |
| chr12 | 14149682 | 14150520 | 839  | 411  | 22 | 43.57 | 5.75 | 47.96 |
| chr12 | 14155740 | 14156924 | 1185 | 896  | 30 | 43.44 | 3.77 | 47.96 |
| chr12 | 14176149 | 14177918 | 1770 | 1207 | 37 | 49.01 | 5.34 | 50.49 |
| chr12 | 14336542 | 14337761 | 1220 | 530  | 27 | 41.64 | 5.3  | 47.17 |
| chr12 | 14537452 | 14538850 | 1399 | 574  | 37 | 46.2  | 5.03 | 48.54 |
| chr12 | 14922012 | 14924165 | 2154 | 821  | 47 | 42.39 | 4.65 | 47.1  |
| chr12 | 15236182 | 15237414 | 1233 | 607  | 25 | 33.67 | 6.98 | 48.65 |
| chr12 | 15671683 | 15672590 | 908  | 367  | 20 | 34.7  | 4.52 | 47.74 |
| chr12 | 15713165 | 15714318 | 1154 | 605  | 24 | 33.71 | 5.34 | 48.61 |
| chr12 | 16008686 | 16010214 | 1529 | 1262 | 33 | 45.73 | 4.52 | 49.89 |
| chr12 | 16049584 | 16051250 | 1667 | 1066 | 33 | 44    | 4.78 | 48.04 |
| chr12 | 16064984 | 16066404 | 1421 | 601  | 30 | 32.98 | 3.53 | 49.24 |
| chr12 | 16243728 | 16244382 | 655  | 371  | 16 | 32.54 | 6.16 | 49.34 |
| chr12 | 16244681 | 16245589 | 909  | 417  | 21 | 38.97 | 5.34 | 46.04 |
| chr12 | 16473005 | 16475167 | 2163 | 873  | 45 | 63.76 | 4.93 | 54.63 |
| chr12 | 16580594 | 16582595 | 2002 | 558  | 42 | 49.09 | 6.09 | 50.49 |

|       |          |          |      |      |    |       |      |       |
|-------|----------|----------|------|------|----|-------|------|-------|
| chr12 | 17846786 | 17847823 | 1038 | 377  | 21 | 31.78 | 5.75 | 49.85 |
| chr12 | 18090974 | 18092123 | 1150 | 861  | 26 | 41.91 | 5.75 | 47.03 |
| chr12 | 18287285 | 18288383 | 1099 | 456  | 24 | 31.55 | 4.89 | 49.93 |
| chr12 | 18338662 | 18339556 | 895  | 460  | 19 | 31.27 | 4.52 | 50.46 |
| chr12 | 18434685 | 18435658 | 974  | 606  | 22 | 35.16 | 5.75 | 47.17 |
| chr12 | 18548214 | 18549072 | 859  | 408  | 21 | 32.17 | 4.45 | 49.93 |
| chr12 | 18573260 | 18574280 | 1021 | 642  | 22 | 31.63 | 6.85 | 49.89 |
| chr12 | 18610884 | 18611581 | 698  | 372  | 17 | 34.34 | 4.93 | 47.84 |
| chr12 | 18792327 | 18793037 | 711  | 272  | 17 | 33.48 | 6.57 | 48.67 |
| chr12 | 18886028 | 18887098 | 1071 | 515  | 21 | 30.16 | 5.34 | 51.62 |
| chr12 | 19944399 | 19945294 | 896  | 574  | 19 | 31.21 | 5.75 | 50.51 |
| chr12 | 20305263 | 20306519 | 1257 | 526  | 32 | 61.88 | 5.75 | 54.32 |
| chr12 | 20349692 | 20350566 | 875  | 438  | 19 | 32.37 | 5.75 | 49.85 |
| chr12 | 20702452 | 20703382 | 931  | 675  | 20 | 33.4  | 4.52 | 48.71 |
| chr12 | 20772043 | 20772742 | 700  | 417  | 19 | 43.95 | 4.93 | 47.71 |
| chr12 | 20783422 | 20784333 | 912  | 640  | 22 | 38.78 | 4.52 | 46.06 |
| chr12 | 20914464 | 20915338 | 875  | 287  | 21 | 41.13 | 4.93 | 46.39 |
| chr12 | 21178198 | 21179718 | 1521 | 1274 | 30 | 38.61 | 4.93 | 46.11 |
| chr12 | 21447579 | 21448439 | 861  | 643  | 20 | 37.51 | 4.52 | 46.02 |
| chr12 | 21510377 | 21511554 | 1178 | 562  | 27 | 44.51 | 5.34 | 48.67 |
| chr12 | 21743801 | 21744921 | 1121 | 507  | 27 | 47.95 | 6.16 | 49.43 |
| chr12 | 21891222 | 21892205 | 984  | 560  | 20 | 30.61 | 4.93 | 51.15 |
| chr12 | 22113415 | 22114547 | 1133 | 575  | 25 | 38.73 | 5.75 | 46.22 |
| chr12 | 22174178 | 22175829 | 1652 | 1250 | 37 | 32.36 | 3.42 | 49.84 |
| chr12 | 22297023 | 22298697 | 1675 | 1076 | 34 | 32.46 | 4.3  | 49.45 |
| chr12 | 22905856 | 22906834 | 979  | 407  | 20 | 30.86 | 4.93 | 50.91 |
| chr12 | 22947960 | 22949262 | 1303 | 695  | 33 | 58.79 | 6.57 | 51.96 |
| chr12 | 22982788 | 22983794 | 1007 | 265  | 25 | 46.23 | 4.93 | 48.66 |
| chr12 | 23321498 | 23322380 | 883  | 283  | 21 | 40.61 | 6.98 | 46.69 |
| chr12 | 23995147 | 23996070 | 924  | 262  | 20 | 33.79 | 4.93 | 48.76 |
| chr12 | 24299116 | 24300677 | 1562 | 1097 | 33 | 31.04 | 4.11 | 50.56 |
| chr12 | 24679662 | 24680532 | 871  | 265  | 20 | 36.89 | 5.34 | 46.68 |
| chr12 | 24789213 | 24790313 | 1101 | 525  | 24 | 36.41 | 6.98 | 47.19 |
| chr12 | 24823672 | 24824489 | 818  | 535  | 18 | 31.39 | 4.93 | 50.18 |
| chr12 | 24855381 | 24856104 | 724  | 268  | 17 | 32.66 | 4.93 | 49.29 |
| chr12 | 25347608 | 25348979 | 1372 | 630  | 33 | 33.36 | 5.29 | 48.7  |
| chr12 | 25626627 | 25627353 | 727  | 354  | 18 | 37.07 | 5.75 | 46.97 |
| chr12 | 26044467 | 26045654 | 1188 | 433  | 33 | 43.81 | 4.36 | 47.88 |
| chr12 | 26178016 | 26178885 | 870  | 342  | 19 | 32.65 | 4.52 | 49.31 |
| chr12 | 26331324 | 26332532 | 1209 | 472  | 24 | 30.7  | 6.93 | 50.98 |
| chr12 | 26479059 | 26480687 | 1629 | 206  | 31 | 43.08 | 4.43 | 47.17 |
| chr12 | 26505898 | 26506782 | 885  | 605  | 19 | 31.81 | 5.34 | 49.78 |
| chr12 | 26576212 | 26577301 | 1090 | 287  | 25 | 30.33 | 4.11 | 51.64 |
| chr12 | 26703161 | 26704634 | 1474 | 769  | 41 | 38.3  | 4.63 | 46.38 |
| chr12 | 27141150 | 27142094 | 945  | 434  | 22 | 36.81 | 6.16 | 46.82 |
| chr12 | 27147524 | 27148510 | 987  | 452  | 21 | 31.59 | 5.45 | 49.99 |
| chr12 | 27421956 | 27422843 | 888  | 252  | 21 | 40.29 | 4.93 | 46.88 |
| chr12 | 27722765 | 27723684 | 920  | 480  | 20 | 34.02 | 5.34 | 48.52 |
| chr12 | 27789459 | 27790818 | 1360 | 677  | 26 | 31.55 | 6.57 | 49.98 |
| chr12 | 28295238 | 28296456 | 1219 | 472  | 27 | 37.19 | 5.33 | 46.86 |
| chr12 | 28434416 | 28435371 | 956  | 338  | 20 | 31.68 | 4.48 | 49.84 |
| chr12 | 28800426 | 28801410 | 985  | 206  | 22 | 34.55 | 4.52 | 47.78 |

|       |          |          |      |      |    |       |      |       |
|-------|----------|----------|------|------|----|-------|------|-------|
| chr12 | 29579975 | 29581122 | 1148 | 518  | 23 | 30.26 | 5.34 | 51.68 |
| chr12 | 30859987 | 30860996 | 1010 | 478  | 23 | 33.03 | 4.95 | 49.14 |
| chr12 | 31673860 | 31674772 | 913  | 279  | 20 | 34.41 | 5.34 | 47.76 |
| chr12 | 31743092 | 31744075 | 984  | 272  | 25 | 47.75 | 6.16 | 49.25 |
| chr12 | 32547658 | 32548613 | 956  | 325  | 20 | 32.05 | 6.16 | 49.81 |
| chr12 | 32968448 | 32969198 | 751  | 446  | 17 | 31.01 | 4.93 | 50.5  |
| chr12 | 33030206 | 33030990 | 785  | 533  | 19 | 37.84 | 4.52 | 46.76 |
| chr12 | 34128001 | 34128862 | 862  | 629  | 19 | 33.1  | 4.93 | 49.14 |
| chr12 | 37910631 | 37911660 | 1030 | 521  | 24 | 40.38 | 4.93 | 46.78 |
| chr12 | 38074081 | 38075034 | 954  | 606  | 20 | 32.16 | 4.93 | 49.86 |
| chr12 | 38159695 | 38160498 | 804  | 478  | 18 | 32.2  | 6.57 | 49.96 |
| chr12 | 38317409 | 38318405 | 997  | 718  | 22 | 33.9  | 4.52 | 48.58 |
| chr12 | 38615645 | 38616657 | 1013 | 726  | 23 | 37.13 | 4.93 | 46.91 |
| chr12 | 39304260 | 39305768 | 1509 | 688  | 32 | 40.91 | 6.09 | 46.41 |
| chr12 | 39414739 | 39415782 | 1044 | 738  | 26 | 48.38 | 4.52 | 49.15 |
| chr12 | 39442649 | 39443626 | 978  | 267  | 20 | 30.91 | 5.34 | 50.61 |
| chr12 | 40427784 | 40428860 | 1077 | 795  | 24 | 33.29 | 4.95 | 48.85 |
| chr12 | 40853632 | 40854306 | 675  | 391  | 17 | 32.93 | 5.01 | 49.36 |
| chr12 | 41167751 | 41168672 | 922  | 640  | 20 | 30.05 | 3.81 | 51.47 |
| chr12 | 41293105 | 41294706 | 1602 | 990  | 41 | 47.67 | 4.98 | 49.21 |
| chr12 | 41373948 | 41374993 | 1046 | 377  | 21 | 31.38 | 5.34 | 50.17 |
| chr12 | 41411481 | 41412561 | 1081 | 799  | 25 | 37.61 | 5.77 | 45.74 |
| chr12 | 41839850 | 41840691 | 842  | 434  | 18 | 30.05 | 4.93 | 51.39 |
| chr12 | 42586977 | 42588096 | 1120 | 286  | 30 | 38.75 | 4.55 | 46.02 |
| chr12 | 42720468 | 42722937 | 2470 | 505  | 57 | 31.18 | 3.16 | 50.54 |
| chr12 | 42740864 | 42742151 | 1288 | 513  | 26 | 30.27 | 4.95 | 51.64 |
| chr12 | 43273886 | 43276011 | 2126 | 1519 | 50 | 78.01 | 6.57 | 56.92 |
| chr12 | 43581606 | 43582527 | 922  | 634  | 20 | 33.9  | 4.52 | 48.66 |
| chr12 | 43746673 | 43748383 | 1711 | 257  | 32 | 37.31 | 4.11 | 46.69 |
| chr12 | 44242478 | 44243744 | 1267 | 558  | 25 | 32.1  | 5.34 | 49.72 |
| chr12 | 44345948 | 44346753 | 806  | 283  | 19 | 36.48 | 7.39 | 47.06 |
| chr12 | 44441388 | 44442765 | 1378 | 1088 | 32 | 54.08 | 5.34 | 52.89 |
| chr12 | 44627498 | 44628406 | 909  | 650  | 21 | 33.58 | 4.09 | 48.66 |
| chr12 | 44795366 | 44796028 | 663  | 391  | 18 | 41.73 | 6.98 | 47.25 |
| chr12 | 44994305 | 44995335 | 1031 | 617  | 21 | 32.13 | 5.34 | 49.78 |
| chr12 | 45282274 | 45283090 | 817  | 530  | 22 | 40.68 | 4.95 | 46.53 |
| chr12 | 45413940 | 45415177 | 1238 | 558  | 25 | 33.43 | 5.75 | 48.61 |
| chr12 | 45524522 | 45525442 | 921  | 632  | 20 | 33.96 | 4.52 | 48.64 |
| chr12 | 45936922 | 45937599 | 678  | 389  | 16 | 31.05 | 4.52 | 50.56 |
| chr12 | 46571455 | 46572758 | 1304 | 814  | 26 | 34.04 | 5.75 | 48.53 |
| chr12 | 46700714 | 46701853 | 1140 | 568  | 24 | 34.4  | 5.75 | 47.75 |
| chr12 | 46812868 | 46813816 | 949  | 366  | 24 | 34.49 | 5.82 | 47.7  |
| chr12 | 47595713 | 47597391 | 1679 | 442  | 42 | 55.93 | 5.48 | 53.29 |
| chr12 | 47601298 | 47602767 | 1470 | 897  | 35 | 34.82 | 4.98 | 47.49 |
| chr12 | 47607783 | 47609209 | 1427 | 448  | 42 | 46.36 | 6.32 | 48.44 |
| chr12 | 47749103 | 47751131 | 2029 | 1343 | 49 | 32.22 | 3.69 | 50.01 |
| chr12 | 47782243 | 47783927 | 1685 | 1054 | 43 | 46.44 | 4.98 | 48.38 |
| chr12 | 47812989 | 47813773 | 785  | 425  | 19 | 37.84 | 5.34 | 46.76 |
| chr12 | 47896667 | 47897387 | 721  | 492  | 17 | 31.44 | 4.38 | 49.99 |
| chr12 | 48110575 | 48111613 | 1039 | 449  | 25 | 39.36 | 6.09 | 46.84 |
| chr12 | 48169677 | 48170495 | 819  | 537  | 19 | 30.28 | 4.42 | 51.68 |
| chr12 | 48633516 | 48634358 | 843  | 558  | 20 | 38.24 | 6.12 | 46.26 |

|       |          |          |      |      |    |       |      |       |
|-------|----------|----------|------|------|----|-------|------|-------|
| chr12 | 48826688 | 48827207 | 520  | 260  | 18 | 60.19 | 7.39 | 55.36 |
| chr12 | 48963621 | 48964272 | 652  | 289  | 16 | 32.74 | 5.34 | 49.34 |
| chr12 | 49215526 | 49216676 | 1151 | 680  | 26 | 41.85 | 5.34 | 47.14 |
| chr12 | 49424599 | 49425919 | 1321 | 671  | 30 | 42.4  | 4.89 | 47.09 |
| chr12 | 49436852 | 49438680 | 1829 | 1192 | 46 | 44.36 | 5.66 | 48.46 |
| chr12 | 49751582 | 49752520 | 939  | 697  | 26 | 43.28 | 4.45 | 47.83 |
| chr12 | 49974375 | 49975436 | 1062 | 436  | 23 | 30.34 | 4.95 | 51.65 |
| chr12 | 50511193 | 50512072 | 880  | 193  | 20 | 31.27 | 3.72 | 50.48 |
| chr12 | 50805078 | 50806906 | 1829 | 1566 | 37 | 44.58 | 4.83 | 48.91 |
| chr12 | 50840340 | 50841513 | 1174 | 560  | 27 | 31.18 | 4.65 | 50.55 |
| chr12 | 50939428 | 50940491 | 1064 | 678  | 23 | 34.37 | 5.34 | 47.86 |
| chr12 | 51152332 | 51153003 | 672  | 382  | 16 | 31.43 | 5.75 | 50.09 |
| chr12 | 51213768 | 51215154 | 1387 | 808  | 35 | 32.75 | 4.57 | 49.37 |
| chr12 | 51265011 | 51266055 | 1045 | 239  | 25 | 43.82 | 6.16 | 47.9  |
| chr12 | 51518049 | 51518797 | 749  | 280  | 21 | 35.37 | 5.39 | 47.57 |
| chr12 | 51827461 | 51828536 | 1076 | 272  | 25 | 41.95 | 5.34 | 47.08 |
| chr12 | 51906359 | 51907598 | 1240 | 595  | 25 | 33.34 | 5.75 | 48.7  |
| chr12 | 52144514 | 52145493 | 980  | 696  | 20 | 30.81 | 4.11 | 50.95 |
| chr12 | 53357233 | 53357898 | 666  | 272  | 17 | 36.53 | 6.57 | 46.95 |
| chr12 | 53372889 | 53373669 | 781  | 512  | 18 | 33.58 | 6.16 | 48.63 |
| chr12 | 53433615 | 53434368 | 754  | 277  | 18 | 35.28 | 5.34 | 47.34 |
| chr12 | 54097900 | 54099265 | 1366 | 622  | 31 | 50.52 | 5.34 | 51.44 |
| chr12 | 54275679 | 54276895 | 1217 | 472  | 27 | 42.3  | 6.98 | 47.38 |
| chr12 | 54920519 | 54921452 | 934  | 258  | 23 | 37.4  | 6.09 | 46.72 |
| chr12 | 54923949 | 54925630 | 1682 | 575  | 39 | 36.95 | 5.29 | 46.93 |
| chr12 | 55255593 | 55256410 | 818  | 477  | 19 | 34.75 | 6.04 | 47.61 |
| chr12 | 55336599 | 55337572 | 974  | 694  | 22 | 35.16 | 6.16 | 47.17 |
| chr12 | 55615596 | 55616743 | 1148 | 444  | 25 | 37.93 | 6.16 | 46.56 |
| chr12 | 55989465 | 55990544 | 1080 | 592  | 23 | 32.49 | 5.24 | 49.47 |
| chr12 | 56194992 | 56195972 | 981  | 568  | 23 | 33.42 | 5.21 | 48.7  |
| chr12 | 56509321 | 56512097 | 2777 | 1256 | 75 | 34.17 | 3.42 | 48.01 |
| chr12 | 56597509 | 56598485 | 977  | 700  | 23 | 30.79 | 4.24 | 51.01 |
| chr12 | 56652093 | 56653122 | 1030 | 768  | 22 | 32.18 | 4.93 | 49.95 |
| chr12 | 57088985 | 57089952 | 968  | 374  | 25 | 48.85 | 6.98 | 50.64 |
| chr12 | 58078930 | 58079911 | 982  | 625  | 23 | 38.92 | 5.75 | 46.26 |
| chr12 | 58170185 | 58171720 | 1536 | 281  | 32 | 34.25 | 4.24 | 47.89 |
| chr12 | 58362834 | 58363692 | 859  | 259  | 19 | 33.28 | 4.52 | 48.91 |
| chr12 | 58376671 | 58377689 | 1019 | 280  | 24 | 41.03 | 5.34 | 46.34 |
| chr12 | 58668225 | 58669225 | 1001 | 384  | 25 | 46.62 | 4.93 | 47.22 |
| chr12 | 59080312 | 59081738 | 1427 | 717  | 28 | 35.67 | 5.34 | 47.16 |
| chr12 | 59736597 | 59737705 | 1109 | 417  | 23 | 32.1  | 4.52 | 49.73 |
| chr12 | 59750603 | 59751423 | 821  | 356  | 18 | 31.22 | 5.34 | 50.51 |
| chr12 | 60167186 | 60168011 | 826  | 277  | 20 | 37.45 | 4.72 | 46.33 |
| chr12 | 60200574 | 60202455 | 1882 | 511  | 40 | 44.84 | 7.36 | 48.84 |
| chr12 | 60418881 | 60420590 | 1710 | 1164 | 37 | 45.43 | 4.95 | 49.74 |
| chr12 | 60582062 | 60582899 | 838  | 553  | 20 | 38.87 | 6.97 | 46.24 |
| chr12 | 60594699 | 60595421 | 723  | 458  | 17 | 32.72 | 6.16 | 49.39 |
| chr12 | 60647789 | 60649001 | 1213 | 552  | 24 | 30.93 | 5.75 | 50.58 |
| chr12 | 60704191 | 60705314 | 1124 | 482  | 25 | 39.22 | 4.93 | 46.41 |
| chr12 | 60866047 | 60867175 | 1129 | 414  | 27 | 47.45 | 6.16 | 48.6  |
| chr12 | 61475333 | 61476482 | 1150 | 379  | 25 | 37.82 | 8.22 | 46.7  |
| chr12 | 62418206 | 62419095 | 890  | 625  | 19 | 31.54 | 4.52 | 49.9  |

|       |          |          |      |      |    |       |      |       |
|-------|----------|----------|------|------|----|-------|------|-------|
| chr12 | 62431578 | 62432559 | 982  | 468  | 24 | 38.65 | 5.71 | 46.13 |
| chr12 | 62516725 | 62517678 | 954  | 413  | 20 | 32.16 | 6.16 | 49.86 |
| chr12 | 62636917 | 62638413 | 1497 | 1074 | 37 | 47.61 | 6.49 | 48.94 |
| chr12 | 62719314 | 62720750 | 1437 | 650  | 30 | 42.65 | 7.39 | 47.34 |
| chr12 | 62897854 | 62898895 | 1042 | 564  | 22 | 31.58 | 5.75 | 49.97 |
| chr12 | 62903741 | 62904582 | 842  | 576  | 21 | 38.97 | 6.47 | 46.11 |
| chr12 | 63199309 | 63200267 | 959  | 566  | 21 | 36    | 5.34 | 47.07 |
| chr12 | 63207354 | 63208189 | 836  | 557  | 18 | 30.38 | 4.52 | 51.65 |
| chr12 | 63455889 | 63456691 | 803  | 288  | 19 | 36.67 | 6.16 | 47.02 |
| chr12 | 63960638 | 63962877 | 2240 | 1990 | 50 | 71.56 | 4.93 | 53.85 |
| chr12 | 64040263 | 64041550 | 1288 | 606  | 26 | 34.78 | 6.16 | 47.61 |
| chr12 | 64205947 | 64207034 | 1088 | 461  | 23 | 33.14 | 5.34 | 49.16 |
| chr12 | 64289179 | 64290426 | 1248 | 661  | 25 | 32.97 | 5.75 | 49.29 |
| chr12 | 64301457 | 64302027 | 571  | 285  | 15 | 32.66 | 6.16 | 49.32 |
| chr12 | 64446441 | 64447163 | 723  | 370  | 18 | 37.34 | 6.16 | 46.8  |
| chr12 | 64985651 | 64986798 | 1148 | 598  | 23 | 30.26 | 5.34 | 51.68 |
| chr12 | 65122659 | 65124100 | 1442 | 944  | 37 | 66.04 | 6.04 | 54.82 |
| chr12 | 65569864 | 65571246 | 1383 | 959  | 30 | 35.47 | 4.64 | 47.42 |
| chr12 | 66098649 | 66099560 | 912  | 585  | 20 | 34.47 | 4.11 | 47.74 |
| chr12 | 66523991 | 66525370 | 1380 | 796  | 28 | 32.26 | 5.27 | 50.05 |
| chr12 | 66534769 | 66536235 | 1467 | 567  | 33 | 35.33 | 4.11 | 47.46 |
| chr12 | 66754041 | 66755267 | 1227 | 706  | 24 | 30.31 | 5.34 | 51.56 |
| chr12 | 67087289 | 67088143 | 855  | 600  | 20 | 37.88 | 5.34 | 46.61 |
| chr12 | 67385098 | 67385934 | 837  | 282  | 18 | 30.33 | 4.52 | 51.59 |
| chr12 | 67705363 | 67706518 | 1156 | 868  | 28 | 31.49 | 3.42 | 49.91 |
| chr12 | 67748390 | 67749986 | 1597 | 1019 | 35 | 35.73 | 4.11 | 47.24 |
| chr12 | 67816031 | 67817047 | 1017 | 322  | 23 | 36.9  | 6.98 | 46.75 |
| chr12 | 68200247 | 68201082 | 836  | 561  | 21 | 39.38 | 6.09 | 46.9  |
| chr12 | 68390268 | 68391171 | 904  | 450  | 19 | 30.79 | 5.75 | 50.91 |
| chr12 | 68686175 | 68687090 | 916  | 502  | 21 | 34.34 | 4.19 | 47.85 |
| chr12 | 69210043 | 69211641 | 1599 | 390  | 35 | 44.59 | 4.23 | 48.91 |
| chr12 | 69632975 | 69633800 | 826  | 561  | 22 | 34.24 | 5.48 | 47.89 |
| chr12 | 69655366 | 69656665 | 1300 | 538  | 31 | 46.71 | 4.84 | 47.52 |
| chr12 | 69672580 | 69674590 | 2011 | 1322 | 41 | 40.49 | 5.05 | 46.95 |
| chr12 | 69718273 | 69720276 | 2004 | 1262 | 42 | 52.23 | 5.51 | 51.22 |
| chr12 | 69722981 | 69724962 | 1982 | 686  | 49 | 34.27 | 5.27 | 47.92 |
| chr12 | 69875927 | 69876891 | 965  | 269  | 21 | 35.66 | 4.93 | 47.29 |
| chr12 | 70610329 | 70611264 | 936  | 358  | 20 | 33.13 | 6.16 | 49.14 |
| chr12 | 70821999 | 70823212 | 1214 | 642  | 28 | 37.69 | 4.69 | 46.54 |
| chr12 | 71270990 | 71271893 | 904  | 247  | 19 | 30.79 | 4.11 | 50.91 |
| chr12 | 71299179 | 71300182 | 1004 | 560  | 21 | 33.53 | 5.34 | 48.64 |
| chr12 | 71326877 | 71328274 | 1398 | 816  | 31 | 48.7  | 6.98 | 50.42 |
| chr12 | 71381929 | 71383013 | 1085 | 337  | 25 | 41.43 | 6.16 | 47.1  |
| chr12 | 72026131 | 72027017 | 887  | 260  | 28 | 43.12 | 5.71 | 47.32 |
| chr12 | 72182663 | 72184022 | 1360 | 1014 | 31 | 38.69 | 3.49 | 46.21 |
| chr12 | 72315501 | 72316807 | 1307 | 503  | 34 | 33.85 | 5.71 | 48.76 |
| chr12 | 72678882 | 72679821 | 940  | 588  | 20 | 32.91 | 5.75 | 49.24 |
| chr12 | 72718563 | 72720074 | 1512 | 563  | 31 | 42.74 | 4.11 | 47.55 |
| chr12 | 72789631 | 72790665 | 1035 | 433  | 21 | 31.93 | 6.16 | 49.77 |
| chr12 | 73002685 | 73003959 | 1275 | 608  | 30 | 51.64 | 6.57 | 51.37 |
| chr12 | 73343991 | 73344926 | 936  | 514  | 20 | 33.13 | 4.93 | 49.14 |
| chr12 | 73381039 | 73381924 | 886  | 615  | 19 | 31.76 | 4.52 | 49.79 |



|       |          |          |      |      |    |       |      |       |
|-------|----------|----------|------|------|----|-------|------|-------|
| chr12 | 73854770 | 73855559 | 790  | 410  | 18 | 33.03 | 4.93 | 49.16 |
| chr12 | 74053179 | 74054076 | 898  | 231  | 19 | 31.11 | 4.52 | 50.64 |
| chr12 | 74496161 | 74497831 | 1671 | 919  | 40 | 66.66 | 5.75 | 55.63 |
| chr12 | 75060789 | 75061836 | 1048 | 544  | 24 | 36.81 | 6.69 | 46.79 |
| chr12 | 75120692 | 75121558 | 867  | 414  | 23 | 46.39 | 7.39 | 48.44 |
| chr12 | 75170853 | 75172086 | 1234 | 687  | 28 | 33.98 | 4.84 | 48.56 |
| chr12 | 75313902 | 75314772 | 871  | 599  | 22 | 40.29 | 6.45 | 46.92 |
| chr12 | 75412622 | 75413850 | 1229 | 651  | 24 | 30.22 | 6.98 | 51.74 |
| chr12 | 75530929 | 75531824 | 896  | 650  | 22 | 39.78 | 5.34 | 46.6  |
| chr12 | 76043074 | 76044597 | 1524 | 750  | 35 | 32.24 | 4.36 | 50.06 |
| chr12 | 76056956 | 76057886 | 931  | 277  | 24 | 46.68 | 5.75 | 47.49 |
| chr12 | 76157514 | 76158518 | 1005 | 535  | 25 | 44.34 | 5.97 | 48.37 |
| chr12 | 76261792 | 76262694 | 903  | 385  | 21 | 39.34 | 4.93 | 46.61 |
| chr12 | 76671198 | 76671791 | 594  | 291  | 15 | 31.65 | 5.3  | 49.92 |
| chr12 | 76841357 | 76842455 | 1099 | 382  | 25 | 35.94 | 4.95 | 47.07 |
| chr12 | 77103339 | 77104424 | 1086 | 527  | 25 | 41.37 | 6.16 | 46.98 |
| chr12 | 77236357 | 77238957 | 2601 | 1165 | 54 | 45.08 | 5.37 | 48.98 |
| chr12 | 78077018 | 78078614 | 1597 | 825  | 37 | 34.88 | 4.36 | 47.62 |
| chr12 | 78109770 | 78110791 | 1022 | 732  | 21 | 32.59 | 4.93 | 49.35 |
| chr12 | 78468818 | 78470074 | 1257 | 472  | 27 | 40.15 | 6.57 | 46.72 |
| chr12 | 78491846 | 78492869 | 1024 | 561  | 21 | 32.49 | 5.34 | 49.45 |
| chr12 | 79240466 | 79242181 | 1716 | 1093 | 38 | 55.68 | 6.57 | 53.88 |
| chr12 | 79459961 | 79460848 | 888  | 269  | 19 | 31.65 | 4.52 | 49.86 |
| chr12 | 79542408 | 79543161 | 754  | 463  | 19 | 39.95 | 4.93 | 46.76 |
| chr12 | 79684701 | 79685760 | 1060 | 426  | 23 | 30.44 | 4.57 | 51.3  |
| chr12 | 79838709 | 79839545 | 837  | 615  | 18 | 30.33 | 4.93 | 51.59 |
| chr12 | 79930373 | 79931476 | 1104 | 601  | 24 | 31.91 | 4.57 | 49.83 |
| chr12 | 79970795 | 79971791 | 997  | 538  | 25 | 46.88 | 6.57 | 47.56 |
| chr12 | 80649986 | 80650805 | 820  | 530  | 18 | 31.28 | 6.16 | 50.36 |
| chr12 | 80697743 | 80698540 | 798  | 220  | 18 | 32.55 | 4.11 | 49.31 |
| chr12 | 80763905 | 80765108 | 1204 | 615  | 26 | 34.91 | 6.93 | 47.62 |
| chr12 | 81042644 | 81043683 | 1040 | 432  | 24 | 39.79 | 5.75 | 46.64 |
| chr12 | 81592239 | 81593043 | 805  | 514  | 18 | 32.14 | 5.34 | 49.83 |
| chr12 | 81762601 | 81763717 | 1117 | 543  | 25 | 39.61 | 6.98 | 46.63 |
| chr12 | 81791702 | 81792488 | 787  | 465  | 20 | 42.43 | 5.75 | 47.3  |
| chr12 | 81814664 | 81815690 | 1027 | 251  | 23 | 36.35 | 4.93 | 47.09 |
| chr12 | 81879052 | 81880274 | 1223 | 608  | 31 | 59.53 | 4.93 | 55.03 |
| chr12 | 82187504 | 82188478 | 975  | 239  | 20 | 31.07 | 4.52 | 50.75 |
| chr12 | 82479438 | 82481031 | 1594 | 1303 | 32 | 39.36 | 5.12 | 46.78 |
| chr12 | 82658179 | 82659321 | 1143 | 640  | 25 | 38.19 | 7.39 | 46.33 |
| chr12 | 82943467 | 82944001 | 535  | 267  | 15 | 37.66 | 6.16 | 46.06 |
| chr12 | 82988910 | 82990288 | 1379 | 1129 | 33 | 44.21 | 4.36 | 48.17 |
| chr12 | 83030582 | 83031893 | 1312 | 554  | 29 | 39.86 | 5.71 | 46.63 |
| chr12 | 83153498 | 83154405 | 908  | 537  | 19 | 30.22 | 5.3  | 51.74 |
| chr12 | 83437890 | 83438867 | 978  | 702  | 22 | 34.93 | 4.52 | 47.58 |
| chr12 | 84214934 | 84215548 | 615  | 284  | 17 | 40.37 | 6.57 | 46.78 |
| chr12 | 84413436 | 84414275 | 840  | 479  | 18 | 30.16 | 6.16 | 51.72 |
| chr12 | 84536814 | 84537544 | 731  | 447  | 17 | 32.22 | 5.75 | 49.98 |
| chr12 | 84870636 | 84871652 | 1017 | 351  | 24 | 41.15 | 7.39 | 46.41 |
| chr12 | 84929710 | 84931086 | 1377 | 723  | 29 | 41.81 | 5.75 | 46.91 |
| chr12 | 85554090 | 85555103 | 1014 | 646  | 21 | 33    | 6.57 | 49.18 |
| chr12 | 85864884 | 85865811 | 928  | 701  | 20 | 33.57 | 5.75 | 48.57 |

|       |          |          |      |      |    |       |      |       |
|-------|----------|----------|------|------|----|-------|------|-------|
| chr12 | 85905662 | 85906664 | 1003 | 466  | 22 | 33.58 | 5.34 | 48.66 |
| chr12 | 86187066 | 86187868 | 803  | 519  | 19 | 33.38 | 6.16 | 48.71 |
| chr12 | 86508518 | 86509367 | 850  | 587  | 20 | 38.2  | 5.34 | 46.37 |
| chr12 | 86561892 | 86563265 | 1374 | 630  | 26 | 30.95 | 5.34 | 50.53 |
| chr12 | 87618653 | 87620637 | 1985 | 626  | 45 | 65.28 | 5.75 | 54.29 |
| chr12 | 87728226 | 87729247 | 1022 | 593  | 21 | 32.59 | 4.52 | 49.35 |
| chr12 | 87905064 | 87905921 | 858  | 540  | 19 | 33.33 | 4.52 | 48.66 |
| chr12 | 88239059 | 88240109 | 1051 | 394  | 21 | 31.13 | 5.34 | 50.63 |
| chr12 | 88323095 | 88324571 | 1477 | 277  | 31 | 33    | 4.19 | 49.21 |
| chr12 | 88376441 | 88377381 | 941  | 283  | 21 | 37.04 | 4.93 | 46.99 |
| chr12 | 88934704 | 88935435 | 732  | 282  | 17 | 32.16 | 5.34 | 49.88 |
| chr12 | 89048203 | 89048952 | 750  | 431  | 22 | 46.34 | 6.16 | 48.4  |
| chr12 | 89138010 | 89139070 | 1061 | 491  | 23 | 34.52 | 5.34 | 47.75 |
| chr12 | 89215213 | 89216651 | 1439 | 931  | 31 | 40.76 | 4.57 | 46.56 |
| chr12 | 89382113 | 89383911 | 1799 | 1080 | 37 | 46.97 | 6.12 | 47.61 |
| chr12 | 89496177 | 89496874 | 698  | 268  | 18 | 34.77 | 6.02 | 47.58 |
| chr12 | 89850144 | 89850817 | 674  | 423  | 17 | 35.06 | 4.03 | 47.43 |
| chr12 | 90397482 | 90398384 | 903  | 622  | 19 | 30.84 | 4.52 | 50.85 |
| chr12 | 90729979 | 90730843 | 865  | 272  | 19 | 32.93 | 4.93 | 49.39 |
| chr12 | 91042320 | 91043088 | 769  | 361  | 22 | 48.77 | 6.57 | 50.69 |
| chr12 | 91380967 | 91381973 | 1007 | 377  | 28 | 60.67 | 8.63 | 54.81 |
| chr12 | 91430418 | 91431369 | 952  | 289  | 26 | 47.22 | 4.79 | 47.9  |
| chr12 | 91477952 | 91479090 | 1139 | 547  | 23 | 30.68 | 6.16 | 51    |
| chr12 | 91601901 | 91602743 | 843  | 565  | 20 | 38.64 | 6.16 | 46.11 |
| chr12 | 92329372 | 92330256 | 885  | 425  | 21 | 40.48 | 4.93 | 46.93 |
| chr12 | 92355839 | 92356750 | 912  | 448  | 20 | 30.58 | 4.95 | 51.23 |
| chr12 | 92457940 | 92459027 | 1088 | 450  | 23 | 30.85 | 4.72 | 50.9  |
| chr12 | 92552282 | 92553399 | 1118 | 583  | 31 | 44.59 | 4.36 | 48.94 |
| chr12 | 93223634 | 93224577 | 944  | 565  | 21 | 36.86 | 5.75 | 46.73 |
| chr12 | 93300938 | 93302095 | 1158 | 734  | 29 | 41.21 | 4.11 | 46.76 |
| chr12 | 93381161 | 93381953 | 793  | 506  | 22 | 31.37 | 5.29 | 50.25 |
| chr12 | 94037863 | 94038830 | 968  | 280  | 21 | 35.49 | 4.93 | 47.45 |
| chr12 | 94575752 | 94576439 | 688  | 272  | 18 | 39.83 | 5.75 | 46.63 |
| chr12 | 94770630 | 94772337 | 1708 | 491  | 37 | 42.8  | 5.16 | 47.42 |
| chr12 | 94797937 | 94799651 | 1715 | 1432 | 35 | 31.53 | 3.42 | 49.94 |
| chr12 | 95056422 | 95057571 | 1150 | 561  | 26 | 41.91 | 5.34 | 47.03 |
| chr12 | 95704373 | 95705898 | 1526 | 1092 | 36 | 35.2  | 4.05 | 47.15 |
| chr12 | 95976151 | 95977173 | 1023 | 627  | 22 | 32.54 | 5.75 | 49.37 |
| chr12 | 96094566 | 96095443 | 878  | 610  | 19 | 32.2  | 4.11 | 49.92 |
| chr12 | 96140520 | 96142112 | 1593 | 1114 | 32 | 42.58 | 4.93 | 47.16 |
| chr12 | 96299748 | 96300511 | 764  | 231  | 23 | 54.42 | 4.93 | 54.01 |
| chr12 | 96406569 | 96407482 | 914  | 349  | 20 | 34.35 | 5.34 | 47.87 |
| chr12 | 97729669 | 97730511 | 843  | 401  | 19 | 34.21 | 5.34 | 47.87 |
| chr12 | 98569871 | 98570898 | 1028 | 408  | 21 | 32.28 | 4.52 | 50.03 |
| chr12 | 98752346 | 98753037 | 692  | 331  | 16 | 30.18 | 5.34 | 51.67 |
| chr12 | 98760393 | 98761446 | 1054 | 517  | 27 | 46.91 | 5.33 | 47.72 |
| chr12 | 99107878 | 99109111 | 1234 | 625  | 27 | 36.41 | 4.95 | 47.17 |
| chr12 | 99329985 | 99331021 | 1037 | 479  | 24 | 35.45 | 4.57 | 47.4  |
| chr12 | 99431401 | 99432332 | 932  | 291  | 21 | 32.26 | 4.47 | 50.06 |
| chr12 | 99440814 | 99441754 | 941  | 253  | 24 | 34.98 | 6.16 | 47.6  |
| chr12 | 99571566 | 99572789 | 1224 | 569  | 24 | 30.44 | 6.16 | 51.32 |
| chr12 | 99681915 | 99682711 | 797  | 325  | 19 | 33.2  | 5.33 | 49.13 |

|       |           |           |      |      |    |        |       |       |
|-------|-----------|-----------|------|------|----|--------|-------|-------|
| chr12 | 99824170  | 99825311  | 1142 | 435  | 23 | 30.14  | 4.89  | 51.63 |
| chr12 | 99845307  | 99846533  | 1227 | 697  | 29 | 35.28  | 4.65  | 47.41 |
| chr12 | 99933846  | 99935397  | 1552 | 732  | 36 | 53.86  | 5.58  | 52.55 |
| chr12 | 100129919 | 100130943 | 1025 | 281  | 26 | 37.65  | 5.14  | 45.96 |
| chr12 | 100396257 | 100397429 | 1173 | 593  | 25 | 36.62  | 5.75  | 46.95 |
| chr12 | 100420396 | 100420977 | 582  | 291  | 15 | 32.66  | 6.16  | 49.32 |
| chr12 | 100860599 | 100861804 | 1206 | 728  | 29 | 38.41  | 4.79  | 46.36 |
| chr12 | 100869070 | 100870003 | 934  | 282  | 21 | 37.45  | 5.34  | 46.33 |
| chr12 | 101659126 | 101660032 | 907  | 285  | 22 | 38.67  | 5.3   | 46.12 |
| chr12 | 101672244 | 101673049 | 806  | 409  | 20 | 30.5   | 4.03  | 51.28 |
| chr12 | 101981887 | 101982715 | 829  | 578  | 18 | 30.77  | 5.34  | 50.95 |
| chr12 | 102104795 | 102105636 | 842  | 464  | 18 | 30.05  | 4.93  | 51.39 |
| chr12 | 102119666 | 102120590 | 925  | 477  | 20 | 33.74  | 5.34  | 48.66 |
| chr12 | 102152721 | 102153773 | 1053 | 496  | 26 | 47.79  | 8.22  | 49.39 |
| chr12 | 102261913 | 102262904 | 992  | 404  | 23 | 38.33  | 5.34  | 46.45 |
| chr12 | 102453690 | 102454916 | 1227 | 763  | 31 | 37.8   | 4.36  | 46.65 |
| chr12 | 102533343 | 102534210 | 868  | 288  | 19 | 32.76  | 5.34  | 49.36 |
| chr12 | 102769369 | 102770401 | 1033 | 667  | 22 | 32.03  | 4.93  | 49.77 |
| chr12 | 103211437 | 103212688 | 1252 | 519  | 29 | 48.69  | 6.16  | 50.31 |
| chr12 | 103333580 | 103334777 | 1198 | 577  | 26 | 39.28  | 7.39  | 46.48 |
| chr12 | 103385053 | 103386077 | 1025 | 602  | 24 | 40.67  | 5.75  | 46.49 |
| chr12 | 103586604 | 103587487 | 884  | 331  | 20 | 36.1   | 4.52  | 47.01 |
| chr12 | 104497853 | 104498856 | 1004 | 714  | 25 | 30.62  | 5.07  | 51.18 |
| chr12 | 104585525 | 104586332 | 808  | 578  | 18 | 31.97  | 4.11  | 49.79 |
| chr12 | 104670404 | 104671014 | 611  | 281  | 15 | 30.8   | 5.75  | 51.01 |
| chr12 | 104831205 | 104832257 | 1053 | 266  | 22 | 31.03  | 4.52  | 50.5  |
| chr12 | 104841323 | 104842069 | 747  | 535  | 17 | 31.25  | 3.7   | 50.49 |
| chr12 | 105486852 | 105487703 | 852  | 343  | 19 | 33.68  | 4.52  | 48.55 |
| chr12 | 105588596 | 105589539 | 944  | 658  | 23 | 41.23  | 4.93  | 46.75 |
| chr12 | 106005382 | 106006367 | 986  | 291  | 20 | 30.51  | 4.52  | 51.28 |
| chr12 | 106308082 | 106309248 | 1167 | 575  | 24 | 33.08  | 6.16  | 49.14 |
| chr12 | 106695879 | 106697185 | 1307 | 589  | 28 | 30.15  | 6.2   | 51.66 |
| chr12 | 107160217 | 107160894 | 678  | 291  | 16 | 31.05  | 5.34  | 50.56 |
| chr12 | 107303755 | 107305159 | 1405 | 747  | 31 | 48.31  | 6.98  | 49.55 |
| chr12 | 107328013 | 107328887 | 875  | 282  | 22 | 41.13  | 4.93  | 46.39 |
| chr12 | 107425632 | 107426506 | 875  | 607  | 23 | 45.82  | 5.34  | 49.92 |
| chr12 | 109781819 | 109783281 | 1463 | 709  | 33 | 43.24  | 5.71  | 47.67 |
| chr12 | 109824146 | 109825532 | 1387 | 676  | 32 | 43.99  | 6.19  | 48.01 |
| chr12 | 109956280 | 109957107 | 828  | 283  | 18 | 30.83  | 4.11  | 50.88 |
| chr12 | 110357594 | 110358564 | 971  | 577  | 20 | 31.27  | 5.75  | 50.48 |
| chr12 | 110761437 | 110762627 | 1191 | 641  | 29 | 42.1   | 5.35  | 46.92 |
| chr12 | 110824623 | 110825711 | 1089 | 503  | 76 | 323.72 | 25.33 | 22.22 |
| chr12 | 110867348 | 110868553 | 1206 | 529  | 26 | 30.95  | 4.33  | 50.52 |
| chr12 | 110938148 | 110941359 | 3212 | 1782 | 74 | 49.43  | 3.42  | 51.79 |
| chr12 | 110999550 | 111000842 | 1293 | 705  | 33 | 38.86  | 6.34  | 46.23 |
| chr12 | 111400451 | 111401253 | 803  | 287  | 18 | 32.26  | 4.52  | 50.09 |
| chr12 | 112005144 | 112006091 | 948  | 709  | 23 | 40.98  | 4.93  | 46.23 |
| chr12 | 112477629 | 112478959 | 1331 | 758  | 27 | 36.46  | 4.93  | 47.14 |
| chr12 | 112492915 | 112493864 | 950  | 274  | 23 | 32.85  | 4.28  | 49.33 |
| chr12 | 112505740 | 112506704 | 965  | 688  | 20 | 31.58  | 5.34  | 50    |
| chr12 | 112567590 | 112568961 | 1372 | 901  | 36 | 36.65  | 5.71  | 47.01 |
| chr12 | 112664287 | 112665446 | 1160 | 316  | 26 | 39.2   | 4.37  | 46.31 |

|       |           |           |      |      |    |       |      |       |
|-------|-----------|-----------|------|------|----|-------|------|-------|
| chr12 | 112717418 | 112719076 | 1659 | 723  | 40 | 45.26 | 5.22 | 49.25 |
| chr12 | 112799968 | 112800666 | 699  | 265  | 18 | 39.03 | 5.75 | 46.3  |
| chr12 | 112846791 | 112847721 | 931  | 486  | 24 | 30.25 | 4.36 | 51.7  |
| chr12 | 112947491 | 112948511 | 1021 | 514  | 21 | 31.63 | 4.83 | 49.89 |
| chr12 | 113274785 | 113275539 | 755  | 494  | 17 | 30.77 | 4.93 | 50.95 |
| chr12 | 113412532 | 113413434 | 903  | 224  | 23 | 33.94 | 3.81 | 48.67 |
| chr12 | 113551316 | 113552230 | 915  | 278  | 20 | 30.42 | 4.57 | 51.33 |
| chr12 | 113586983 | 113587741 | 759  | 284  | 20 | 44.48 | 6.57 | 48.45 |
| chr12 | 114660922 | 114661736 | 815  | 573  | 19 | 35.92 | 6.16 | 47.05 |
| chr12 | 115022464 | 115023292 | 829  | 540  | 19 | 35.05 | 4.11 | 47.49 |
| chr12 | 117164324 | 117165354 | 1031 | 530  | 25 | 44.69 | 7.39 | 48.77 |
| chr12 | 117339126 | 117340035 | 910  | 551  | 24 | 36.92 | 6.51 | 46.79 |
| chr12 | 118310306 | 118311225 | 920  | 270  | 21 | 38.29 | 4.52 | 46.31 |
| chr12 | 118728133 | 118729139 | 1007 | 650  | 21 | 33.37 | 5.34 | 48.68 |
| chr12 | 118847406 | 118848615 | 1210 | 650  | 25 | 34.77 | 5.34 | 47.62 |
| chr12 | 119387653 | 119388744 | 1092 | 741  | 24 | 36.89 | 5.34 | 46.71 |
| chr12 | 120047585 | 120048800 | 1216 | 553  | 24 | 30.8  | 6.16 | 51.01 |
| chr12 | 120468662 | 120470234 | 1573 | 1178 | 34 | 41.37 | 4.95 | 46.96 |
| chr12 | 120493729 | 120494661 | 933  | 701  | 22 | 33.36 | 4.57 | 48.69 |
| chr12 | 120636548 | 120638589 | 2042 | 627  | 55 | 55.79 | 5.22 | 53.47 |
| chr12 | 120910254 | 120911222 | 969  | 542  | 21 | 33.15 | 4.33 | 49.17 |
| chr12 | 120972271 | 120973552 | 1282 | 864  | 30 | 35.83 | 3.99 | 47.03 |
| chr12 | 121245933 | 121247070 | 1138 | 560  | 24 | 34.5  | 6.16 | 47.67 |
| chr12 | 121829973 | 121830816 | 844  | 574  | 19 | 34.15 | 4.52 | 48    |
| chr12 | 122016923 | 122017741 | 819  | 283  | 19 | 30.28 | 5.52 | 51.68 |
| chr12 | 122332460 | 122333740 | 1281 | 623  | 27 | 38.92 | 7.39 | 46.29 |
| chr12 | 122897090 | 122898174 | 1085 | 759  | 24 | 37.27 | 4.52 | 46.59 |
| chr12 | 122965111 | 122966032 | 922  | 503  | 20 | 32.91 | 6.45 | 49.31 |
| chr12 | 123003954 | 123006150 | 2197 | 842  | 44 | 32.17 | 4.99 | 49.92 |
| chr12 | 123130567 | 123131758 | 1192 | 680  | 26 | 39.6  | 6.16 | 46.54 |
| chr12 | 123364193 | 123365215 | 1023 | 605  | 21 | 32.54 | 6.57 | 49.37 |
| chr12 | 125445700 | 125446767 | 1068 | 573  | 25 | 37.67 | 4.95 | 46.36 |
| chr12 | 125545620 | 125547025 | 1406 | 855  | 28 | 36.63 | 6.57 | 46.92 |
| chr12 | 126062607 | 126063863 | 1257 | 447  | 28 | 38.97 | 5.33 | 46.13 |
| chr12 | 126507005 | 126508586 | 1582 | 1045 | 30 | 35.91 | 4.52 | 47.03 |
| chr12 | 126851034 | 126851668 | 635  | 282  | 17 | 38.81 | 6.16 | 46.12 |
| chr12 | 128914337 | 128914999 | 663  | 372  | 16 | 32.01 | 5.34 | 49.76 |
| chr12 | 132598577 | 132599289 | 713  | 407  | 19 | 33.5  | 4.79 | 48.66 |
| chr12 | 132628170 | 132629725 | 1556 | 488  | 44 | 49.16 | 4.57 | 50.72 |
| chr12 | 132959462 | 132961221 | 1760 | 584  | 37 | 43.03 | 5.33 | 47.5  |
| chr12 | 133666059 | 133667166 | 1108 | 686  | 23 | 32.15 | 6.16 | 49.87 |
| chr13 | 19823603  | 19824487  | 885  | 452  | 19 | 31.81 | 4.93 | 49.78 |
| chr13 | 20656174  | 20657568  | 1395 | 1006 | 34 | 44.07 | 4.19 | 48.05 |
| chr13 | 20959301  | 20960840  | 1540 | 1013 | 34 | 49.09 | 6.57 | 50.55 |
| chr13 | 20974878  | 20975632  | 755  | 248  | 18 | 35.21 | 4.93 | 47.17 |
| chr13 | 21154550  | 21155608  | 1059 | 371  | 22 | 30.74 | 5.34 | 50.97 |
| chr13 | 21221727  | 21223125  | 1399 | 528  | 36 | 61.14 | 4.67 | 54.58 |
| chr13 | 21271733  | 21272641  | 909  | 275  | 22 | 38.97 | 7.39 | 46.04 |
| chr13 | 21501832  | 21502831  | 1000 | 276  | 21 | 33.74 | 6.98 | 48.62 |
| chr13 | 21548812  | 21549749  | 938  | 402  | 21 | 33.08 | 5.33 | 49.17 |
| chr13 | 21723524  | 21725025  | 1502 | 873  | 37 | 47.49 | 5.48 | 48.55 |
| chr13 | 21847276  | 21848037  | 762  | 369  | 17 | 30.36 | 4.52 | 51.65 |

|       |          |          |      |      |    |       |      |       |
|-------|----------|----------|------|------|----|-------|------|-------|
| chr13 | 21856899 | 21857728 | 830  | 561  | 18 | 30.71 | 5.34 | 50.99 |
| chr13 | 22024600 | 22025211 | 612  | 335  | 15 | 30.73 | 5.34 | 51.05 |
| chr13 | 22302269 | 22303149 | 881  | 281  | 22 | 30.85 | 5.14 | 50.92 |
| chr13 | 22564401 | 22565188 | 788  | 502  | 18 | 33.15 | 3.7  | 49.12 |
| chr13 | 24012230 | 24013429 | 1200 | 632  | 24 | 31.52 | 5.34 | 49.89 |
| chr13 | 24239596 | 24240574 | 979  | 281  | 21 | 34.88 | 4.93 | 47.64 |
| chr13 | 24247547 | 24248247 | 701  | 285  | 17 | 34.14 | 5.75 | 48.03 |
| chr13 | 25037082 | 25039754 | 2673 | 616  | 58 | 47.83 | 4.58 | 49.29 |
| chr13 | 25654595 | 25655496 | 902  | 643  | 21 | 39.4  | 4.93 | 46.96 |
| chr13 | 25670383 | 25671789 | 1407 | 666  | 37 | 37.92 | 6.85 | 46.57 |
| chr13 | 25990295 | 25991254 | 960  | 385  | 21 | 35.94 | 6.16 | 47.02 |
| chr13 | 26512260 | 26513163 | 904  | 262  | 20 | 34.93 | 5.34 | 47.57 |
| chr13 | 27089626 | 27090317 | 692  | 364  | 16 | 30.18 | 4.93 | 51.67 |
| chr13 | 27839422 | 27840349 | 928  | 604  | 20 | 33.57 | 4.52 | 48.57 |
| chr13 | 27844445 | 27845742 | 1298 | 732  | 34 | 63.75 | 5.75 | 54.37 |
| chr13 | 27949076 | 27950905 | 1830 | 1304 | 34 | 35.28 | 5.3  | 47.38 |
| chr13 | 28068032 | 28069006 | 975  | 675  | 25 | 48.36 | 9.04 | 49.1  |
| chr13 | 28164052 | 28164677 | 626  | 376  | 16 | 34.53 | 4.52 | 47.73 |
| chr13 | 28418165 | 28419250 | 1086 | 579  | 23 | 33.24 | 4.52 | 49.01 |
| chr13 | 28632857 | 28633740 | 884  | 622  | 20 | 36.1  | 4.93 | 47.01 |
| chr13 | 29092627 | 29094198 | 1572 | 934  | 33 | 33.37 | 5.35 | 48.67 |
| chr13 | 29209202 | 29209871 | 670  | 269  | 17 | 36.25 | 5.75 | 46.95 |
| chr13 | 29435949 | 29436928 | 980  | 546  | 21 | 34.82 | 6.16 | 47.49 |
| chr13 | 30378105 | 30379074 | 970  | 613  | 26 | 49.72 | 5.84 | 51.9  |
| chr13 | 30687050 | 30687617 | 568  | 284  | 16 | 37.66 | 6.57 | 46.06 |
| chr13 | 30788175 | 30789230 | 1056 | 276  | 21 | 30.89 | 4.52 | 50.76 |
| chr13 | 31018552 | 31022510 | 3959 | 3310 | 97 | 71.72 | 4.89 | 55.45 |
| chr13 | 31034017 | 31035620 | 1604 | 757  | 43 | 31.85 | 3.75 | 49.71 |
| chr13 | 31145723 | 31147099 | 1377 | 594  | 38 | 31.96 | 3.23 | 49.78 |
| chr13 | 31318134 | 31318735 | 602  | 318  | 16 | 31.46 | 4.79 | 50.02 |
| chr13 | 32670194 | 32671026 | 833  | 485  | 18 | 30.55 | 4.11 | 51.23 |
| chr13 | 32892988 | 32894471 | 1484 | 815  | 39 | 45.16 | 4.85 | 48.9  |
| chr13 | 32906227 | 32907601 | 1375 | 571  | 35 | 39.8  | 4.67 | 46.66 |
| chr13 | 33013780 | 33014476 | 697  | 285  | 17 | 34.06 | 4.48 | 48.52 |
| chr13 | 33239781 | 33241282 | 1502 | 300  | 38 | 61.03 | 5.71 | 54.55 |
| chr13 | 33363431 | 33364400 | 970  | 297  | 21 | 35.38 | 6.16 | 47.52 |
| chr13 | 33568935 | 33569952 | 1018 | 641  | 21 | 32.8  | 5.34 | 49.43 |
| chr13 | 33686221 | 33687345 | 1125 | 521  | 26 | 33.2  | 4.89 | 49.14 |
| chr13 | 33927203 | 33928026 | 824  | 432  | 18 | 31.05 | 5.34 | 50.62 |
| chr13 | 34719736 | 34720711 | 976  | 257  | 23 | 39.27 | 6.98 | 46.45 |
| chr13 | 34828117 | 34829065 | 949  | 689  | 21 | 36.57 | 5.34 | 46.89 |
| chr13 | 35234355 | 35235349 | 995  | 551  | 20 | 30.06 | 4.93 | 51.48 |
| chr13 | 35412343 | 35412937 | 595  | 289  | 15 | 31.89 | 5.75 | 49.84 |
| chr13 | 35464241 | 35465181 | 941  | 655  | 21 | 32.91 | 4.95 | 49.3  |
| chr13 | 35671834 | 35672511 | 678  | 289  | 17 | 35.69 | 5.75 | 47.24 |
| chr13 | 35741419 | 35743029 | 1611 | 1320 | 36 | 39.49 | 4.16 | 46.98 |
| chr13 | 35838520 | 35839737 | 1218 | 441  | 27 | 42.25 | 5.34 | 47.03 |
| chr13 | 36039656 | 36041345 | 1690 | 585  | 30 | 34.81 | 4.93 | 47.57 |
| chr13 | 36488742 | 36489481 | 740  | 242  | 18 | 36.19 | 4.52 | 46.9  |
| chr13 | 36643466 | 36644341 | 876  | 636  | 19 | 32.31 | 4.52 | 50.09 |
| chr13 | 37032811 | 37033728 | 918  | 419  | 19 | 30.05 | 5.34 | 51.47 |
| chr13 | 37082902 | 37084071 | 1170 | 563  | 26 | 40.79 | 4.93 | 46.34 |

|       |          |          |      |      |    |       |      |       |
|-------|----------|----------|------|------|----|-------|------|-------|
| chr13 | 37116310 | 37116931 | 622  | 251  | 15 | 30.07 | 4.93 | 51.52 |
| chr13 | 37268941 | 37270512 | 1572 | 1290 | 34 | 47.42 | 5.34 | 48.43 |
| chr13 | 37299378 | 37300233 | 856  | 676  | 20 | 37.82 | 4.11 | 46.66 |
| chr13 | 37312163 | 37312901 | 739  | 288  | 19 | 41.02 | 5.75 | 46.25 |
| chr13 | 37741004 | 37741572 | 569  | 284  | 17 | 39.16 | 6.47 | 46.24 |
| chr13 | 37861257 | 37862228 | 972  | 363  | 22 | 35.27 | 6.57 | 47.3  |
| chr13 | 38242067 | 38242890 | 824  | 536  | 18 | 31.05 | 4.93 | 50.62 |
| chr13 | 38922578 | 38924029 | 1452 | 265  | 32 | 31.4  | 3.2  | 50.2  |
| chr13 | 39099830 | 39100844 | 1015 | 379  | 22 | 32.95 | 4.93 | 49.29 |
| chr13 | 39794499 | 39795597 | 1099 | 453  | 23 | 32.59 | 4.52 | 49.39 |
| chr13 | 39980994 | 39982386 | 1393 | 757  | 30 | 44.92 | 6.57 | 48.83 |
| chr13 | 40133921 | 40134778 | 858  | 549  | 20 | 33.67 | 4.19 | 48.66 |
| chr13 | 40634564 | 40635505 | 942  | 564  | 22 | 35.92 | 5.24 | 47.06 |
| chr13 | 41038282 | 41039216 | 935  | 305  | 20 | 33.18 | 4.11 | 49.11 |
| chr13 | 41178138 | 41178949 | 812  | 290  | 18 | 31.74 | 6.16 | 49.76 |
| chr13 | 41326414 | 41327502 | 1089 | 588  | 27 | 35.78 | 4.65 | 47.14 |
| chr13 | 41743082 | 41744312 | 1231 | 569  | 26 | 37.57 | 7.39 | 45.97 |
| chr13 | 41760718 | 41761677 | 960  | 670  | 21 | 31.29 | 5.27 | 50.33 |
| chr13 | 41767615 | 41769679 | 2065 | 1523 | 48 | 35.11 | 4    | 47.39 |
| chr13 | 41913374 | 41914437 | 1064 | 286  | 34 | 61.77 | 7.57 | 53.88 |
| chr13 | 42147801 | 42148772 | 972  | 379  | 22 | 35.27 | 6.57 | 47.3  |
| chr13 | 42169240 | 42171275 | 2036 | 671  | 46 | 66.53 | 6.98 | 55.19 |
| chr13 | 42194712 | 42196085 | 1374 | 746  | 36 | 51.33 | 7.19 | 51.47 |
| chr13 | 42459045 | 42459904 | 860  | 589  | 21 | 37.79 | 4.57 | 46.72 |
| chr13 | 42514769 | 42515946 | 1178 | 637  | 26 | 40.35 | 6.98 | 46.86 |
| chr13 | 42592518 | 42594328 | 1811 | 421  | 34 | 36.57 | 4.11 | 46.86 |
| chr13 | 42618301 | 42619866 | 1566 | 777  | 45 | 51.19 | 5.66 | 51.73 |
| chr13 | 42972434 | 42974396 | 1963 | 1239 | 44 | 34.52 | 4.89 | 47.73 |
| chr13 | 43077923 | 43079006 | 1084 | 504  | 25 | 41.49 | 4.93 | 47.06 |
| chr13 | 43238755 | 43239563 | 809  | 329  | 18 | 31.91 | 3.7  | 49.82 |
| chr13 | 43513984 | 43515557 | 1574 | 522  | 37 | 35.98 | 4.98 | 47.08 |
| chr13 | 44077960 | 44078795 | 836  | 554  | 18 | 30.38 | 3.7  | 51.65 |
| chr13 | 44283475 | 44284363 | 889  | 607  | 20 | 35.81 | 5.34 | 47.08 |
| chr13 | 44750439 | 44750982 | 544  | 272  | 15 | 37.66 | 6.16 | 46.06 |
| chr13 | 45530750 | 45532085 | 1336 | 760  | 28 | 34.99 | 4.95 | 47.59 |
| chr13 | 45688237 | 45688755 | 519  | 259  | 15 | 35.59 | 5.3  | 47.2  |
| chr13 | 45962189 | 45963199 | 1011 | 739  | 24 | 41.51 | 4.93 | 47.24 |
| chr13 | 46288843 | 46289567 | 725  | 329  | 18 | 37.2  | 6.57 | 46.93 |
| chr13 | 46414345 | 46414906 | 562  | 281  | 16 | 42.93 | 6.57 | 47.38 |
| chr13 | 46472989 | 46474673 | 1685 | 1013 | 37 | 53.34 | 6.98 | 51.71 |
| chr13 | 46553802 | 46556021 | 2220 | 787  | 54 | 34.03 | 4.48 | 48.59 |
| chr13 | 46602134 | 46603168 | 1035 | 554  | 28 | 31.92 | 5.61 | 49.8  |
| chr13 | 46819795 | 46821154 | 1360 | 681  | 29 | 37.41 | 8.37 | 46.64 |
| chr13 | 46824461 | 46825918 | 1458 | 1225 | 33 | 49.48 | 4.52 | 51.56 |
| chr13 | 46895297 | 46896462 | 1166 | 488  | 24 | 32.71 | 4.89 | 49.41 |
| chr13 | 47196227 | 47197289 | 1063 | 540  | 22 | 30.55 | 5.75 | 51.18 |
| chr13 | 47270453 | 47271336 | 884  | 605  | 21 | 40.55 | 5.75 | 46.93 |
| chr13 | 47317151 | 47318043 | 893  | 246  | 19 | 31.38 | 4.11 | 50.16 |
| chr13 | 47375694 | 47377508 | 1815 | 1275 | 40 | 58.38 | 6.16 | 53.91 |
| chr13 | 48178781 | 48179520 | 740  | 320  | 18 | 36.19 | 5.34 | 46.9  |
| chr13 | 48535161 | 48536856 | 1696 | 411  | 40 | 32.39 | 4.28 | 49.75 |
| chr13 | 48664045 | 48665394 | 1350 | 698  | 34 | 31.04 | 3.96 | 50.58 |

|       |          |          |      |      |    |       |      |       |
|-------|----------|----------|------|------|----|-------|------|-------|
| chr13 | 48700572 | 48702057 | 1486 | 479  | 30 | 34.98 | 3.42 | 47.61 |
| chr13 | 48705128 | 48706183 | 1056 | 606  | 24 | 35.7  | 6.23 | 47.21 |
| chr13 | 48837256 | 48838231 | 976  | 420  | 20 | 31.01 | 6.57 | 50.49 |
| chr13 | 49096857 | 49099476 | 2620 | 568  | 56 | 57.78 | 5.16 | 53.24 |
| chr13 | 49221285 | 49222352 | 1068 | 565  | 21 | 30.31 | 5.75 | 51.54 |
| chr13 | 49358752 | 49359613 | 862  | 193  | 19 | 32.74 | 4.89 | 49.34 |
| chr13 | 49527777 | 49529040 | 1264 | 791  | 29 | 42.46 | 4.57 | 47.37 |
| chr13 | 49834761 | 49836247 | 1487 | 1216 | 30 | 36.45 | 4.28 | 47.15 |
| chr13 | 50329580 | 50330519 | 940  | 624  | 20 | 31.93 | 5.24 | 49.73 |
| chr13 | 50482356 | 50483236 | 881  | 595  | 19 | 32.03 | 5.75 | 49.73 |
| chr13 | 50596121 | 50597281 | 1161 | 524  | 27 | 32.44 | 4.36 | 49.53 |
| chr13 | 50895891 | 50896732 | 842  | 436  | 18 | 30.05 | 5.34 | 51.39 |
| chr13 | 51313181 | 51314130 | 950  | 363  | 22 | 32.41 | 4.95 | 49.65 |
| chr13 | 51501522 | 51502796 | 1275 | 528  | 26 | 35.4  | 4.93 | 47.57 |
| chr13 | 51863815 | 51864703 | 889  | 268  | 27 | 65.18 | 7.39 | 53.98 |
| chr13 | 52010784 | 52012338 | 1555 | 1049 | 35 | 34.12 | 3.91 | 48.08 |
| chr13 | 52036097 | 52036783 | 687  | 468  | 17 | 35.07 | 4.93 | 47.35 |
| chr13 | 52322515 | 52324156 | 1642 | 429  | 36 | 34.64 | 4.32 | 47.64 |
| chr13 | 52363912 | 52364811 | 900  | 609  | 21 | 39.53 | 6.98 | 46.86 |
| chr13 | 52567147 | 52567970 | 824  | 420  | 18 | 31.05 | 5.34 | 50.62 |
| chr13 | 52698313 | 52699534 | 1222 | 627  | 29 | 42.53 | 6.63 | 47.17 |
| chr13 | 52765741 | 52767457 | 1717 | 1032 | 38 | 31.73 | 4.94 | 49.74 |
| chr13 | 52812807 | 52813879 | 1073 | 528  | 24 | 32.88 | 6.4  | 49.34 |
| chr13 | 52832738 | 52833905 | 1168 | 630  | 24 | 33.03 | 5.34 | 49.12 |
| chr13 | 53310739 | 53311727 | 989  | 520  | 20 | 30.36 | 5.34 | 51.62 |
| chr13 | 53644296 | 53645138 | 843  | 565  | 19 | 34.21 | 4.52 | 47.87 |
| chr13 | 53976263 | 53977365 | 1103 | 525  | 26 | 33.17 | 5.48 | 49.16 |
| chr13 | 54651159 | 54652032 | 874  | 281  | 19 | 32.42 | 6.57 | 49.55 |
| chr13 | 54964036 | 54964840 | 805  | 551  | 18 | 32.14 | 5.34 | 49.83 |
| chr13 | 55789907 | 55790781 | 875  | 591  | 21 | 36.83 | 4.57 | 46.88 |
| chr13 | 55841221 | 55842280 | 1060 | 600  | 22 | 30.69 | 4.93 | 51.01 |
| chr13 | 55967355 | 55968018 | 664  | 349  | 16 | 31.95 | 5.34 | 49.78 |
| chr13 | 56302885 | 56303764 | 880  | 614  | 19 | 32.09 | 5.34 | 49.72 |
| chr13 | 56701957 | 56702852 | 896  | 638  | 20 | 31.47 | 4.57 | 50.01 |
| chr13 | 56918792 | 56919645 | 854  | 564  | 19 | 33.57 | 5.34 | 48.6  |
| chr13 | 58213951 | 58214850 | 900  | 553  | 19 | 31    | 4.52 | 50.47 |
| chr13 | 58408960 | 58410805 | 1846 | 608  | 37 | 39.18 | 4.19 | 46.23 |
| chr13 | 58541402 | 58542436 | 1035 | 258  | 24 | 35.56 | 4.19 | 47.15 |
| chr13 | 58790512 | 58791795 | 1284 | 813  | 28 | 37.56 | 5.33 | 45.96 |
| chr13 | 58932045 | 58933099 | 1055 | 377  | 24 | 38.93 | 6.16 | 46.25 |
| chr13 | 58994150 | 58995317 | 1168 | 638  | 24 | 33.03 | 4.93 | 49.12 |
| chr13 | 59265738 | 59267301 | 1564 | 384  | 30 | 36.69 | 4.52 | 46.91 |
| chr13 | 59856040 | 59857160 | 1121 | 772  | 24 | 35.37 | 5.75 | 47.53 |
| chr13 | 60655253 | 60657343 | 2091 | 455  | 52 | 37.87 | 4.25 | 46.65 |
| chr13 | 60676452 | 60677584 | 1133 | 569  | 25 | 38.27 | 4.89 | 46.29 |
| chr13 | 60680553 | 60682129 | 1577 | 248  | 31 | 30.41 | 4.11 | 51.39 |
| chr13 | 60776462 | 60777224 | 763  | 517  | 17 | 30.3  | 5.34 | 51.54 |
| chr13 | 61138765 | 61139942 | 1178 | 503  | 29 | 53.3  | 6.57 | 51.79 |
| chr13 | 62167665 | 62168550 | 886  | 633  | 19 | 31.76 | 4.93 | 49.79 |
| chr13 | 62376919 | 62377876 | 958  | 685  | 26 | 49.03 | 6.47 | 50.55 |
| chr13 | 62390211 | 62391326 | 1116 | 431  | 23 | 31.77 | 6.16 | 49.85 |
| chr13 | 62409709 | 62410759 | 1051 | 397  | 23 | 35.05 | 4.93 | 47.54 |

|       |          |          |      |      |     |       |      |       |
|-------|----------|----------|------|------|-----|-------|------|-------|
| chr13 | 62627025 | 62627975 | 951  | 633  | 25  | 32.66 | 5.6  | 49.31 |
| chr13 | 63002562 | 63003916 | 1355 | 598  | 29  | 37.66 | 4.95 | 46.01 |
| chr13 | 63209106 | 63210236 | 1131 | 519  | 24  | 30.58 | 5.33 | 51.19 |
| chr13 | 63296862 | 63298493 | 1632 | 579  | 33  | 40.77 | 4.93 | 46.49 |
| chr13 | 63318754 | 63319822 | 1069 | 645  | 25  | 42.37 | 6.57 | 47.01 |
| chr13 | 63420744 | 63421480 | 737  | 518  | 20  | 31.2  | 3.74 | 50.54 |
| chr13 | 63512241 | 63513199 | 959  | 356  | 20  | 31.52 | 4.89 | 49.88 |
| chr13 | 63579272 | 63580215 | 944  | 289  | 20  | 32.69 | 4.93 | 49.42 |
| chr13 | 63609186 | 63611096 | 1911 | 797  | 66  | 31.7  | 4.97 | 49.78 |
| chr13 | 63620576 | 63624001 | 3426 | 2887 | 138 | 89.89 | 4.87 | 39.39 |
| chr13 | 64261515 | 64263107 | 1593 | 565  | 33  | 42.58 | 4.11 | 47.16 |
| chr13 | 64729756 | 64731555 | 1800 | 563  | 41  | 63.29 | 5.34 | 54.72 |
| chr13 | 64756370 | 64757327 | 958  | 416  | 20  | 31.95 | 5.34 | 49.8  |
| chr13 | 64815696 | 64816679 | 984  | 758  | 20  | 30.61 | 4.11 | 51.15 |
| chr13 | 64929896 | 64930831 | 936  | 614  | 24  | 41.55 | 6.85 | 47.19 |
| chr13 | 65211536 | 65212746 | 1211 | 475  | 24  | 31.02 | 6.57 | 50.48 |
| chr13 | 65384433 | 65385241 | 809  | 546  | 22  | 45.72 | 5.75 | 49.92 |
| chr13 | 65599657 | 65601175 | 1519 | 270  | 31  | 33.91 | 4.37 | 48.69 |
| chr13 | 65652198 | 65653101 | 904  | 248  | 19  | 30.79 | 4.11 | 50.91 |
| chr13 | 65997299 | 65998399 | 1101 | 424  | 24  | 32.06 | 4.57 | 49.83 |
| chr13 | 66122022 | 66123386 | 1365 | 796  | 29  | 42.43 | 4.93 | 47.26 |
| chr13 | 66215655 | 66216569 | 915  | 266  | 21  | 38.6  | 4.52 | 46.1  |
| chr13 | 66281463 | 66282488 | 1026 | 531  | 21  | 32.38 | 5.75 | 49.71 |
| chr13 | 66474335 | 66475054 | 720  | 283  | 18  | 34.89 | 4.67 | 47.59 |
| chr13 | 66673316 | 66674174 | 859  | 498  | 19  | 33.28 | 4.11 | 48.91 |
| chr13 | 67254344 | 67256124 | 1781 | 562  | 35  | 37.97 | 5.51 | 46.36 |
| chr13 | 67531966 | 67532774 | 809  | 523  | 20  | 40.9  | 4.93 | 46.35 |
| chr13 | 67659810 | 67660752 | 943  | 500  | 20  | 30.04 | 5.84 | 51.45 |
| chr13 | 67702779 | 67703849 | 1071 | 473  | 21  | 30.16 | 4.93 | 51.62 |
| chr13 | 67777802 | 67778729 | 928  | 280  | 21  | 37.81 | 5.34 | 46.63 |
| chr13 | 67900847 | 67902232 | 1386 | 1104 | 30  | 45.29 | 4.93 | 49.39 |
| chr13 | 68013991 | 68015410 | 1420 | 1162 | 30  | 36.56 | 3.72 | 46.88 |
| chr13 | 68096862 | 68097928 | 1067 | 551  | 23  | 34.21 | 6.16 | 47.92 |
| chr13 | 68106261 | 68107507 | 1247 | 484  | 30  | 53.37 | 7.8  | 51.46 |
| chr13 | 68157657 | 68158773 | 1117 | 663  | 26  | 43.82 | 6.98 | 47.87 |
| chr13 | 68392919 | 68394021 | 1103 | 522  | 25  | 33.79 | 4.42 | 48.81 |
| chr13 | 68490906 | 68491645 | 740  | 238  | 17  | 31.67 | 3.7  | 49.82 |
| chr13 | 68531904 | 68532791 | 888  | 632  | 20  | 35.86 | 4.93 | 47.02 |
| chr13 | 68861663 | 68863275 | 1613 | 262  | 36  | 44.84 | 3.72 | 48.77 |
| chr13 | 69065066 | 69066793 | 1728 | 1348 | 37  | 37.69 | 4.19 | 46.42 |
| chr13 | 69094775 | 69095401 | 627  | 291  | 18  | 44.65 | 6.16 | 48.87 |
| chr13 | 69246235 | 69247163 | 929  | 688  | 22  | 37.75 | 5.75 | 46.67 |
| chr13 | 69333416 | 69334505 | 1090 | 529  | 24  | 32    | 4.52 | 49.77 |
| chr13 | 69344884 | 69345910 | 1027 | 513  | 23  | 32.12 | 4.57 | 49.74 |
| chr13 | 69346515 | 69347406 | 892  | 601  | 20  | 35.63 | 6.57 | 47.33 |
| chr13 | 69506327 | 69507409 | 1083 | 797  | 24  | 32.36 | 4.52 | 49.85 |
| chr13 | 69614445 | 69615377 | 933  | 269  | 22  | 37.51 | 6.57 | 46.02 |
| chr13 | 69623570 | 69624609 | 1040 | 473  | 24  | 35.28 | 6.47 | 47.4  |
| chr13 | 69627724 | 69628746 | 1023 | 614  | 25  | 45.2  | 6.16 | 49.11 |
| chr13 | 69628830 | 69629734 | 905  | 281  | 21  | 39.22 | 5.75 | 46.37 |
| chr13 | 69637878 | 69638977 | 1100 | 306  | 26  | 39.84 | 5.71 | 46.62 |
| chr13 | 69640013 | 69641860 | 1848 | 820  | 48  | 54.42 | 4.67 | 54    |



|       |          |          |      |      |    |       |      |       |
|-------|----------|----------|------|------|----|-------|------|-------|
| chr13 | 69810548 | 69811461 | 914  | 281  | 23 | 32.73 | 4.45 | 49.37 |
| chr13 | 69992896 | 69993796 | 901  | 639  | 20 | 35.1  | 4.52 | 47.35 |
| chr13 | 69996119 | 69996943 | 825  | 290  | 18 | 30.99 | 4.52 | 50.47 |
| chr13 | 70550012 | 70550986 | 975  | 265  | 20 | 31.07 | 4.11 | 50.75 |
| chr13 | 70673508 | 70675089 | 1582 | 546  | 30 | 39.44 | 4.52 | 47.06 |
| chr13 | 70821982 | 70822608 | 627  | 308  | 16 | 34.46 | 5.34 | 47.79 |
| chr13 | 70943023 | 70944053 | 1031 | 379  | 21 | 32.13 | 4.93 | 49.78 |
| chr13 | 70983829 | 70984696 | 868  | 639  | 19 | 32.76 | 4.11 | 49.36 |
| chr13 | 71709942 | 71711279 | 1338 | 751  | 30 | 47.93 | 6.57 | 49.38 |
| chr13 | 71716447 | 71717015 | 569  | 284  | 16 | 37.66 | 6.57 | 46.06 |
| chr13 | 71754894 | 71755917 | 1024 | 506  | 22 | 32.49 | 4.93 | 49.45 |
| chr13 | 72300570 | 72301539 | 970  | 590  | 21 | 31.32 | 4.19 | 50.25 |
| chr13 | 72962011 | 72962845 | 835  | 482  | 18 | 30.44 | 4.93 | 51.32 |
| chr13 | 73325853 | 73327756 | 1904 | 588  | 40 | 45.74 | 4.52 | 49.85 |
| chr13 | 73329710 | 73331233 | 1524 | 380  | 35 | 41.57 | 4.24 | 47.25 |
| chr13 | 73482515 | 73483905 | 1391 | 277  | 30 | 35.78 | 3.24 | 47.13 |
| chr13 | 73570309 | 73572506 | 2198 | 1588 | 40 | 33.44 | 5.59 | 48.6  |
| chr13 | 73763528 | 73765137 | 1610 | 578  | 37 | 48.69 | 4.47 | 50.26 |
| chr13 | 73934775 | 73935766 | 992  | 454  | 20 | 30.21 | 5.34 | 51.73 |
| chr13 | 74218081 | 74219395 | 1315 | 620  | 25 | 30    | 5.75 | 51.46 |
| chr13 | 74701697 | 74703125 | 1429 | 706  | 41 | 47.16 | 4.14 | 47.61 |
| chr13 | 74717353 | 74718017 | 665  | 393  | 16 | 31.88 | 4.93 | 49.82 |
| chr13 | 74784602 | 74785954 | 1353 | 656  | 27 | 35.43 | 5.34 | 47.48 |
| chr13 | 74913508 | 74914419 | 912  | 503  | 19 | 30.36 | 4.93 | 51.57 |
| chr13 | 75008644 | 75009530 | 887  | 251  | 19 | 31.7  | 4.11 | 49.74 |
| chr13 | 75244003 | 75245341 | 1339 | 656  | 30 | 44.7  | 6.3  | 48.77 |
| chr13 | 75276497 | 75277341 | 845  | 384  | 19 | 34.09 | 5.75 | 48.17 |
| chr13 | 75559607 | 75560531 | 925  | 279  | 21 | 37.99 | 4.93 | 46.41 |
| chr13 | 75998514 | 75999959 | 1446 | 521  | 36 | 51.35 | 4.69 | 51.55 |
| chr13 | 76074701 | 76075895 | 1195 | 449  | 25 | 31.08 | 6.09 | 50.75 |
| chr13 | 76532748 | 76533581 | 834  | 579  | 18 | 30.49 | 6.16 | 51.26 |
| chr13 | 76550312 | 76551193 | 882  | 319  | 22 | 40.68 | 7.39 | 46.47 |
| chr13 | 77241103 | 77241975 | 873  | 272  | 19 | 32.48 | 4.52 | 49.44 |
| chr13 | 77503463 | 77504360 | 898  | 626  | 19 | 31.11 | 4.52 | 50.64 |
| chr13 | 77506789 | 77507860 | 1072 | 626  | 21 | 30.12 | 5.75 | 51.63 |
| chr13 | 77546108 | 77546742 | 635  | 256  | 16 | 33.9  | 5.75 | 48.62 |
| chr13 | 77613261 | 77614134 | 874  | 272  | 20 | 36.71 | 5.34 | 46.91 |
| chr13 | 77749618 | 77751185 | 1568 | 1305 | 31 | 33.78 | 3.22 | 48.7  |
| chr13 | 78008888 | 78009823 | 936  | 257  | 21 | 36.27 | 4.83 | 46.92 |
| chr13 | 78426794 | 78428336 | 1543 | 572  | 30 | 37.61 | 3.7  | 45.76 |
| chr13 | 78504148 | 78505615 | 1468 | 873  | 31 | 44.95 | 5.34 | 48.76 |
| chr13 | 78507050 | 78508007 | 958  | 676  | 20 | 31.95 | 4.93 | 49.8  |
| chr13 | 78758718 | 78759765 | 1048 | 606  | 23 | 35.21 | 5.34 | 47.2  |
| chr13 | 78791023 | 78792315 | 1293 | 667  | 27 | 38.31 | 5.34 | 46.39 |
| chr13 | 79020390 | 79021508 | 1119 | 524  | 23 | 31.62 | 6.16 | 49.91 |
| chr13 | 79043323 | 79044285 | 963  | 282  | 23 | 40.06 | 6.16 | 46.57 |
| chr13 | 79370359 | 79371160 | 802  | 291  | 18 | 32.32 | 4.93 | 50.01 |
| chr13 | 79815048 | 79815988 | 941  | 284  | 20 | 32.86 | 5.34 | 49.3  |
| chr13 | 80000445 | 80002009 | 1565 | 971  | 39 | 50.41 | 6.1  | 51.73 |
| chr13 | 80122550 | 80124281 | 1732 | 1444 | 36 | 38.32 | 4.79 | 46.48 |
| chr13 | 81156405 | 81157162 | 758  | 348  | 17 | 30.59 | 5.34 | 51.24 |
| chr13 | 81386539 | 81387630 | 1092 | 572  | 23 | 32.94 | 5.75 | 49.38 |

|       |          |          |      |      |    |        |      |       |
|-------|----------|----------|------|------|----|--------|------|-------|
| chr13 | 82076568 | 82077641 | 1074 | 518  | 25 | 42.07  | 5.75 | 47.1  |
| chr13 | 82090135 | 82090891 | 757  | 326  | 19 | 39.74  | 5.75 | 46.63 |
| chr13 | 82872118 | 82872956 | 839  | 347  | 18 | 30.22  | 3.7  | 51.69 |
| chr13 | 83575598 | 83576497 | 900  | 345  | 20 | 35.16  | 5.75 | 47.05 |
| chr13 | 83856483 | 83857506 | 1024 | 480  | 22 | 32.49  | 5.75 | 49.45 |
| chr13 | 84257525 | 84258825 | 1301 | 587  | 26 | 34.17  | 4.93 | 48.01 |
| chr13 | 84450842 | 84451730 | 889  | 553  | 19 | 31.59  | 6.57 | 49.94 |
| chr13 | 84575102 | 84576275 | 1174 | 568  | 27 | 44.74  | 6.16 | 48.89 |
| chr13 | 84878115 | 84879017 | 903  | 622  | 20 | 34.99  | 4.52 | 47.57 |
| chr13 | 85160128 | 85161070 | 943  | 657  | 22 | 36.92  | 5.34 | 46.83 |
| chr13 | 85202787 | 85203719 | 933  | 289  | 22 | 37.51  | 5.34 | 46.02 |
| chr13 | 85734080 | 85734884 | 805  | 420  | 18 | 32.14  | 6.16 | 49.83 |
| chr13 | 85879241 | 85880426 | 1186 | 745  | 28 | 39.95  | 5.1  | 46.73 |
| chr13 | 86130940 | 86132322 | 1383 | 802  | 28 | 34.95  | 5.12 | 47.68 |
| chr13 | 86192626 | 86193980 | 1355 | 722  | 32 | 38.2   | 5.93 | 46.35 |
| chr13 | 86300317 | 86301445 | 1129 | 838  | 31 | 65.71  | 6.12 | 53.8  |
| chr13 | 86301726 | 86303186 | 1461 | 671  | 33 | 49.32  | 6.98 | 51.07 |
| chr13 | 86450992 | 86453417 | 2426 | 1679 | 67 | 107.54 | 6.26 | 27.27 |
| chr13 | 86458493 | 86460203 | 1711 | 1251 | 34 | 33.6   | 4.47 | 48.71 |
| chr13 | 86493962 | 86495699 | 1738 | 274  | 46 | 84.99  | 6.57 | 50    |
| chr13 | 86504149 | 86505134 | 986  | 661  | 23 | 38.68  | 6.16 | 46.15 |
| chr13 | 86560396 | 86561456 | 1061 | 266  | 28 | 36.91  | 4.67 | 46.81 |
| chr13 | 86730777 | 86732221 | 1445 | 282  | 31 | 46.15  | 3.7  | 49.02 |
| chr13 | 87190953 | 87192176 | 1224 | 526  | 28 | 33.86  | 4.79 | 48.65 |
| chr13 | 87224459 | 87225753 | 1295 | 479  | 28 | 42.13  | 5.75 | 46.84 |
| chr13 | 87227447 | 87228483 | 1037 | 713  | 23 | 35.8   | 4.52 | 47.11 |
| chr13 | 87375084 | 87376144 | 1061 | 605  | 24 | 31.7   | 5.46 | 49.75 |
| chr13 | 87396371 | 87397373 | 1003 | 312  | 23 | 34.65  | 4.28 | 47.65 |
| chr13 | 87596584 | 87597923 | 1340 | 718  | 31 | 33.63  | 5.12 | 48.78 |
| chr13 | 87643681 | 87645914 | 2234 | 709  | 53 | 50.37  | 4.67 | 51.85 |
| chr13 | 87773209 | 87773824 | 616  | 290  | 15 | 30.47  | 5.75 | 51.28 |
| chr13 | 87855045 | 87856673 | 1629 | 557  | 34 | 31.23  | 3.77 | 50.52 |
| chr13 | 88150176 | 88151116 | 941  | 674  | 21 | 32.91  | 4.95 | 49.3  |
| chr13 | 88447455 | 88448294 | 840  | 566  | 18 | 30.16  | 4.11 | 51.72 |
| chr13 | 88576811 | 88577929 | 1119 | 405  | 27 | 48.07  | 4.93 | 49.22 |
| chr13 | 88754509 | 88756695 | 2187 | 595  | 52 | 32.96  | 4.21 | 49.3  |
| chr13 | 89032024 | 89033640 | 1617 | 957  | 37 | 37.48  | 4.89 | 46    |
| chr13 | 89065029 | 89066968 | 1940 | 1364 | 42 | 59.69  | 5.34 | 56.21 |
| chr13 | 89348851 | 89349778 | 928  | 578  | 21 | 31.36  | 4.01 | 50.22 |
| chr13 | 89432573 | 89433712 | 1140 | 617  | 24 | 31.38  | 5.45 | 50.24 |
| chr13 | 89490718 | 89492038 | 1321 | 499  | 28 | 40.77  | 5.75 | 46.59 |
| chr13 | 89568084 | 89568912 | 829  | 289  | 19 | 32.93  | 4.72 | 49.33 |
| chr13 | 89864476 | 89865830 | 1355 | 518  | 30 | 36.15  | 4.59 | 46.96 |
| chr13 | 90094705 | 90095637 | 933  | 715  | 20 | 33.29  | 4.11 | 48.81 |
| chr13 | 90116813 | 90117900 | 1088 | 406  | 29 | 53.53  | 5.33 | 52.11 |
| chr13 | 90294256 | 90295851 | 1596 | 954  | 35 | 50.1   | 5.34 | 51.67 |
| chr13 | 90394358 | 90396032 | 1675 | 383  | 32 | 30.52  | 3.64 | 51.3  |
| chr13 | 90921088 | 90921892 | 805  | 378  | 20 | 41.17  | 5.75 | 46.48 |
| chr13 | 90926556 | 90927510 | 955  | 688  | 24 | 45.06  | 5.34 | 49.09 |
| chr13 | 91174385 | 91175211 | 827  | 557  | 18 | 30.88  | 4.93 | 50.73 |
| chr13 | 91338186 | 91339009 | 824  | 564  | 18 | 31.05  | 3.7  | 50.62 |
| chr13 | 91962478 | 91964033 | 1556 | 1072 | 30 | 36.79  | 4.67 | 46.84 |

|       |           |           |      |      |    |       |      |       |
|-------|-----------|-----------|------|------|----|-------|------|-------|
| chr13 | 92023345  | 92024421  | 1077 | 279  | 27 | 38.37 | 4.79 | 46.38 |
| chr13 | 92025784  | 92026694  | 911  | 285  | 21 | 38.84 | 4.52 | 46.22 |
| chr13 | 93506936  | 93507916  | 981  | 548  | 21 | 34.77 | 4.93 | 47.62 |
| chr13 | 94120848  | 94121373  | 526  | 263  | 15 | 42.93 | 6.16 | 47.38 |
| chr13 | 94222240  | 94223314  | 1075 | 286  | 25 | 42.01 | 5.34 | 47.1  |
| chr13 | 94657672  | 94658838  | 1167 | 446  | 27 | 45.15 | 5.34 | 48.84 |
| chr13 | 94745383  | 94746396  | 1014 | 355  | 22 | 33    | 7.39 | 49.18 |
| chr13 | 94872196  | 94873165  | 970  | 290  | 21 | 35.38 | 5.34 | 47.52 |
| chr13 | 94907129  | 94907765  | 637  | 384  | 16 | 33.76 | 4.93 | 48.72 |
| chr13 | 95245099  | 95246195  | 1097 | 516  | 28 | 41.04 | 4.79 | 46.46 |
| chr13 | 95280529  | 95281939  | 1411 | 265  | 35 | 37.84 | 4.05 | 46.73 |
| chr13 | 95688922  | 95690797  | 1876 | 1212 | 44 | 48.71 | 4.79 | 50.37 |
| chr13 | 95903225  | 95904458  | 1234 | 698  | 26 | 34.11 | 5.84 | 48.11 |
| chr13 | 96317025  | 96318140  | 1116 | 400  | 24 | 33.2  | 4.72 | 49.11 |
| chr13 | 96363333  | 96364504  | 1172 | 635  | 28 | 46.96 | 5.18 | 47.61 |
| chr13 | 96445460  | 96446487  | 1028 | 583  | 23 | 36.29 | 5.75 | 46.98 |
| chr13 | 96530805  | 96531620  | 816  | 264  | 19 | 35.85 | 4.93 | 46.94 |
| chr13 | 96646724  | 96648246  | 1523 | 1043 | 33 | 39.41 | 4.14 | 47.04 |
| chr13 | 96654874  | 96655951  | 1078 | 708  | 25 | 41.84 | 5.75 | 47.01 |
| chr13 | 96871740  | 96872631  | 892  | 508  | 26 | 59.58 | 6.98 | 55.41 |
| chr13 | 97054786  | 97055790  | 1005 | 250  | 22 | 33.48 | 5.75 | 48.6  |
| chr13 | 97083806  | 97084589  | 784  | 496  | 18 | 33.39 | 6.57 | 48.71 |
| chr13 | 97874473  | 97875405  | 933  | 662  | 20 | 31.87 | 4.39 | 49.75 |
| chr13 | 97931040  | 97931901  | 862  | 273  | 20 | 37.44 | 4.93 | 46.3  |
| chr13 | 98086358  | 98087895  | 1538 | 749  | 38 | 31.68 | 4.42 | 49.83 |
| chr13 | 98977884  | 98978561  | 678  | 209  | 16 | 31.05 | 4.52 | 50.56 |
| chr13 | 99657838  | 99658822  | 985  | 368  | 20 | 30.56 | 4.93 | 51.26 |
| chr13 | 99713621  | 99714353  | 733  | 457  | 18 | 36.66 | 4.52 | 47.02 |
| chr13 | 100307327 | 100308727 | 1401 | 912  | 30 | 31.93 | 4.11 | 49.76 |
| chr13 | 100332677 | 100333591 | 915  | 285  | 24 | 47.79 | 5.75 | 49.34 |
| chr13 | 101386205 | 101387020 | 816  | 527  | 19 | 35.85 | 5.75 | 46.94 |
| chr13 | 102167539 | 102168651 | 1113 | 535  | 23 | 31.91 | 4.52 | 49.84 |
| chr13 | 102180555 | 102181955 | 1401 | 616  | 29 | 34.71 | 5.65 | 47.71 |
| chr13 | 102230083 | 102231125 | 1043 | 471  | 22 | 31.53 | 5.34 | 49.89 |
| chr13 | 102291597 | 102293446 | 1850 | 1136 | 36 | 41.72 | 6.57 | 47.21 |
| chr13 | 102326568 | 102327941 | 1374 | 628  | 34 | 42.9  | 4.75 | 47.39 |
| chr13 | 102629948 | 102630757 | 810  | 362  | 18 | 31.5  | 4.89 | 49.87 |
| chr13 | 102925300 | 102926065 | 766  | 346  | 17 | 30.13 | 5.75 | 51.65 |
| chr13 | 102963546 | 102964295 | 750  | 482  | 17 | 31.07 | 6.16 | 50.77 |
| chr13 | 103281823 | 103282681 | 859  | 286  | 20 | 37.63 | 5.34 | 45.86 |
| chr13 | 103419028 | 103420244 | 1217 | 500  | 26 | 38.28 | 6.16 | 46.29 |
| chr13 | 103856901 | 103857943 | 1043 | 644  | 23 | 35.48 | 6.98 | 47.45 |
| chr13 | 103993773 | 103994757 | 985  | 654  | 20 | 30.56 | 4.52 | 51.26 |
| chr13 | 104137525 | 104138476 | 952  | 550  | 20 | 32.27 | 4.52 | 50.07 |
| chr13 | 104735375 | 104736022 | 648  | 378  | 16 | 33.01 | 5.34 | 49.16 |
| chr13 | 104755287 | 104756152 | 866  | 610  | 20 | 37.2  | 5.34 | 46.91 |
| chr13 | 104983595 | 104984175 | 581  | 290  | 17 | 42.93 | 6.98 | 47.38 |
| chr13 | 105068445 | 105070146 | 1702 | 538  | 33 | 48.57 | 4.93 | 49.59 |
| chr13 | 105093346 | 105094457 | 1112 | 517  | 23 | 31.96 | 5.75 | 49.77 |
| chr13 | 105185127 | 105186116 | 990  | 438  | 21 | 34.28 | 5.75 | 47.79 |
| chr13 | 105499436 | 105500263 | 828  | 286  | 19 | 35.11 | 4.52 | 47.37 |
| chr13 | 105631844 | 105633018 | 1175 | 557  | 24 | 32.69 | 5.75 | 49.39 |

|       |           |           |      |      |    |       |      |       |
|-------|-----------|-----------|------|------|----|-------|------|-------|
| chr13 | 106494743 | 106495614 | 872  | 588  | 22 | 41.33 | 6.57 | 46.82 |
| chr13 | 108328900 | 108329838 | 939  | 692  | 22 | 37.16 | 5.34 | 46.85 |
| chr13 | 108799936 | 108800777 | 842  | 572  | 18 | 30.05 | 4.11 | 51.39 |
| chr13 | 108975056 | 108975896 | 841  | 260  | 26 | 58.29 | 7.61 | 54.31 |
| chr13 | 109067572 | 109068690 | 1119 | 322  | 26 | 43.7  | 6.57 | 47.81 |
| chr13 | 109847990 | 109849282 | 1293 | 698  | 26 | 34.55 | 5.34 | 47.77 |
| chr13 | 109950598 | 109951485 | 888  | 289  | 21 | 30.45 | 6.16 | 51.3  |
| chr13 | 111024992 | 111025933 | 942  | 609  | 20 | 32.8  | 4.52 | 49.45 |
| chr13 | 111240053 | 111240916 | 864  | 371  | 19 | 32.99 | 4.93 | 49.23 |
| chr13 | 113035309 | 113036484 | 1176 | 470  | 24 | 32.65 | 6.16 | 49.35 |
| chr13 | 113824858 | 113825545 | 688  | 317  | 16 | 30.42 | 4.93 | 51.34 |
| chr13 | 113897774 | 113898795 | 1022 | 519  | 22 | 32.59 | 5.34 | 49.35 |
| chr13 | 114957553 | 114958384 | 832  | 558  | 18 | 30.6  | 5.34 | 51.25 |
| chr13 | 114983889 | 114985353 | 1465 | 932  | 30 | 41.26 | 4.52 | 46.85 |
| chr14 | 19066843  | 19069277  | 2435 | 1598 | 62 | 41.55 | 3.83 | 47.15 |
| chr14 | 19098278  | 19100320  | 2043 | 664  | 48 | 33.88 | 5.29 | 48.59 |
| chr14 | 19588639  | 19590716  | 2078 | 660  | 53 | 30.52 | 4.51 | 51.3  |
| chr14 | 19668604  | 19671464  | 2861 | 842  | 77 | 37.23 | 3.78 | 46.71 |
| chr14 | 19853649  | 19854774  | 1126 | 459  | 26 | 30.24 | 3.99 | 51.75 |
| chr14 | 19866396  | 19868036  | 1641 | 895  | 55 | 53.34 | 4.79 | 51.62 |
| chr14 | 20040622  | 20042102  | 1481 | 996  | 48 | 34.23 | 3.44 | 47.93 |
| chr14 | 20190363  | 20191786  | 1424 | 758  | 30 | 30.88 | 5.48 | 50.78 |
| chr14 | 20209061  | 20210310  | 1250 | 968  | 31 | 31.75 | 3.77 | 49.79 |
| chr14 | 20242856  | 20244145  | 1290 | 645  | 34 | 38.51 | 5.11 | 46.4  |
| chr14 | 20298036  | 20301734  | 3699 | 642  | 94 | 75.27 | 4.73 | 59.21 |
| chr14 | 20327413  | 20328964  | 1552 | 1023 | 42 | 32.18 | 4.61 | 49.99 |
| chr14 | 20657572  | 20658525  | 954  | 257  | 22 | 30.49 | 4.05 | 51.33 |
| chr14 | 20720701  | 20722462  | 1762 | 1148 | 36 | 41.3  | 4.67 | 46.9  |
| chr14 | 20901580  | 20902842  | 1263 | 691  | 26 | 35.98 | 5.34 | 47.09 |
| chr14 | 21312085  | 21313000  | 916  | 283  | 20 | 31.49 | 3.89 | 49.91 |
| chr14 | 21399352  | 21400751  | 1400 | 639  | 33 | 38.67 | 5.14 | 46.09 |
| chr14 | 21405872  | 21407352  | 1481 | 288  | 31 | 34.2  | 3.57 | 47.93 |
| chr14 | 21410139  | 21411619  | 1481 | 419  | 31 | 34.2  | 4.28 | 47.93 |
| chr14 | 21642402  | 21643560  | 1159 | 692  | 24 | 30.47 | 4.67 | 51.23 |
| chr14 | 21998467  | 21999509  | 1043 | 288  | 27 | 31.15 | 5.31 | 50.6  |
| chr14 | 22044780  | 22046192  | 1413 | 815  | 32 | 31.37 | 4.67 | 50.26 |
| chr14 | 22048875  | 22049788  | 914  | 347  | 22 | 34.46 | 4.95 | 47.78 |
| chr14 | 22107301  | 22110880  | 3580 | 2479 | 82 | 59.12 | 4.19 | 53.16 |
| chr14 | 22577063  | 22578315  | 1253 | 739  | 31 | 35.09 | 4.89 | 47.34 |
| chr14 | 22608061  | 22609337  | 1277 | 429  | 28 | 31.23 | 5.14 | 50.52 |
| chr14 | 22648904  | 22649945  | 1042 | 451  | 25 | 35.9  | 3.97 | 46.98 |
| chr14 | 22664018  | 22665263  | 1246 | 625  | 32 | 35.77 | 4.98 | 47.11 |
| chr14 | 23090917  | 23092533  | 1617 | 291  | 41 | 39.16 | 3.42 | 46.2  |
| chr14 | 23143162  | 23144867  | 1706 | 521  | 37 | 30.05 | 4.05 | 51.45 |
| chr14 | 23947762  | 23949496  | 1735 | 932  | 41 | 40.58 | 4.67 | 46.86 |
| chr14 | 24102125  | 24102740  | 616  | 353  | 18 | 31.69 | 4.98 | 49.76 |
| chr14 | 24131809  | 24132668  | 860  | 579  | 21 | 41.02 | 4.83 | 46.23 |
| chr14 | 24239254  | 24240563  | 1310 | 594  | 30 | 31.89 | 4.48 | 49.82 |
| chr14 | 24762360  | 24763587  | 1228 | 547  | 31 | 36.48 | 5.5  | 47.04 |
| chr14 | 24989635  | 24990719  | 1085 | 589  | 28 | 41.8  | 4.79 | 47.07 |
| chr14 | 25265111  | 25266383  | 1273 | 746  | 29 | 40.42 | 5.58 | 46.88 |
| chr14 | 25269056  | 25269926  | 871  | 594  | 22 | 31.44 | 4.45 | 49.98 |

|       |          |          |      |      |    |       |      |       |
|-------|----------|----------|------|------|----|-------|------|-------|
| chr14 | 25597051 | 25598041 | 991  | 701  | 27 | 33.72 | 5.85 | 48.63 |
| chr14 | 25702876 | 25704240 | 1365 | 693  | 31 | 50.58 | 7.8  | 51.64 |
| chr14 | 25716669 | 25717941 | 1273 | 703  | 31 | 56.2  | 7.8  | 53.83 |
| chr14 | 25779818 | 25781092 | 1275 | 626  | 26 | 30.86 | 6.09 | 50.93 |
| chr14 | 25859733 | 25861206 | 1474 | 1211 | 30 | 31.97 | 4.33 | 49.83 |
| chr14 | 25970737 | 25972045 | 1309 | 514  | 30 | 30.18 | 4.05 | 51.69 |
| chr14 | 26122101 | 26123050 | 950  | 291  | 22 | 36.52 | 6.16 | 46.93 |
| chr14 | 26339947 | 26341563 | 1617 | 998  | 38 | 61.28 | 5.75 | 54.51 |
| chr14 | 26669387 | 26670389 | 1003 | 725  | 21 | 31.95 | 4.38 | 49.79 |
| chr14 | 26800327 | 26800966 | 640  | 260  | 16 | 33.55 | 5.75 | 48.55 |
| chr14 | 26948002 | 26948854 | 853  | 603  | 19 | 31.53 | 4.72 | 49.94 |
| chr14 | 27033697 | 27034646 | 950  | 274  | 22 | 31.27 | 4.84 | 50.44 |
| chr14 | 27055547 | 27057119 | 1573 | 669  | 37 | 33.06 | 3.29 | 49.15 |
| chr14 | 27172003 | 27173350 | 1348 | 607  | 30 | 47.37 | 5.34 | 48.34 |
| chr14 | 27195149 | 27195877 | 729  | 288  | 19 | 41.75 | 6.98 | 47.11 |
| chr14 | 27316927 | 27318262 | 1336 | 563  | 31 | 47.16 | 7.31 | 47.53 |
| chr14 | 27604793 | 27606315 | 1523 | 433  | 31 | 30.65 | 4.87 | 51.14 |
| chr14 | 27616069 | 27616783 | 715  | 242  | 18 | 33.09 | 4.09 | 49.2  |
| chr14 | 27669886 | 27671556 | 1671 | 834  | 39 | 40.5  | 4.85 | 46.91 |
| chr14 | 27687548 | 27688318 | 771  | 276  | 24 | 54.03 | 6.85 | 52.95 |
| chr14 | 27739692 | 27741323 | 1632 | 599  | 30 | 30.59 | 4.47 | 51.24 |
| chr14 | 27748590 | 27749943 | 1354 | 732  | 30 | 30.39 | 4.85 | 51.61 |
| chr14 | 27850038 | 27851310 | 1273 | 720  | 26 | 35.49 | 5.34 | 47.37 |
| chr14 | 27987790 | 27988684 | 895  | 628  | 22 | 32.15 | 4.64 | 49.89 |
| chr14 | 28022642 | 28023672 | 1031 | 384  | 24 | 30.98 | 3.84 | 50.44 |
| chr14 | 28331368 | 28332287 | 920  | 652  | 23 | 42.77 | 5.34 | 47.52 |
| chr14 | 28341211 | 28342274 | 1064 | 435  | 23 | 32.04 | 7.09 | 49.79 |
| chr14 | 28634966 | 28636873 | 1908 | 434  | 42 | 35.56 | 5.6  | 47.15 |
| chr14 | 28731426 | 28732232 | 807  | 566  | 18 | 31.67 | 4.48 | 49.85 |
| chr14 | 28806164 | 28807896 | 1733 | 701  | 42 | 63.44 | 5.33 | 55.5  |
| chr14 | 29015396 | 29016727 | 1332 | 299  | 38 | 62.44 | 6.85 | 55.51 |
| chr14 | 29017864 | 29019641 | 1778 | 570  | 44 | 73.19 | 6.57 | 56.32 |
| chr14 | 29095729 | 29097424 | 1696 | 1171 | 40 | 39.36 | 4.05 | 46.8  |
| chr14 | 29209344 | 29211473 | 2130 | 499  | 44 | 37.19 | 4.11 | 46.86 |
| chr14 | 29517170 | 29518797 | 1628 | 1170 | 35 | 42.27 | 4.95 | 47.31 |
| chr14 | 29624307 | 29625100 | 794  | 537  | 19 | 32.3  | 4.47 | 50.08 |
| chr14 | 29899232 | 29900344 | 1113 | 782  | 28 | 42.85 | 4.64 | 47.28 |
| chr14 | 29905313 | 29906139 | 827  | 263  | 19 | 31.93 | 4.23 | 49.74 |
| chr14 | 30042932 | 30044098 | 1167 | 512  | 27 | 33.33 | 4.79 | 48.7  |
| chr14 | 30189915 | 30191910 | 1996 | 729  | 39 | 38.44 | 4.52 | 46.35 |
| chr14 | 30310539 | 30311661 | 1123 | 847  | 25 | 39.28 | 4.52 | 46.46 |
| chr14 | 30321020 | 30321965 | 946  | 284  | 21 | 36.75 | 4.93 | 46.92 |
| chr14 | 30584208 | 30585634 | 1427 | 776  | 37 | 57.53 | 6.56 | 53.68 |
| chr14 | 30767226 | 30768524 | 1299 | 748  | 29 | 36.16 | 4.28 | 47    |
| chr14 | 30967829 | 30970094 | 2266 | 456  | 55 | 35.29 | 3.45 | 47.4  |
| chr14 | 30978032 | 30979451 | 1420 | 729  | 38 | 36.53 | 4.08 | 46.94 |
| chr14 | 31020393 | 31022688 | 2296 | 507  | 57 | 44.93 | 4.77 | 48.76 |
| chr14 | 31306875 | 31309408 | 2534 | 745  | 56 | 33.96 | 4.57 | 48.62 |
| chr14 | 31387560 | 31391160 | 3601 | 2947 | 89 | 36.27 | 3.88 | 46.93 |
| chr14 | 31470313 | 31471793 | 1481 | 714  | 39 | 33.83 | 4.21 | 48.79 |
| chr14 | 31939342 | 31940355 | 1014 | 763  | 26 | 32.51 | 4.67 | 49.37 |
| chr14 | 32295375 | 32297427 | 2053 | 490  | 51 | 34.84 | 3.89 | 47.57 |

|       |          |          |      |      |    |       |      |       |
|-------|----------|----------|------|------|----|-------|------|-------|
| chr14 | 32533545 | 32536352 | 2808 | 1267 | 60 | 39.22 | 3.54 | 46.42 |
| chr14 | 32632264 | 32633390 | 1127 | 434  | 29 | 36.56 | 4.36 | 46.87 |
| chr14 | 32640431 | 32641633 | 1203 | 291  | 29 | 33.49 | 3.81 | 48.69 |
| chr14 | 32766951 | 32768451 | 1501 | 1274 | 31 | 35.45 | 3.68 | 47.43 |
| chr14 | 32820108 | 32821159 | 1052 | 678  | 27 | 34.98 | 4.76 | 47.63 |
| chr14 | 32968700 | 32970342 | 1643 | 591  | 44 | 49.71 | 6.36 | 51.6  |
| chr14 | 32974146 | 32975451 | 1306 | 1025 | 35 | 37.74 | 3.45 | 46.63 |
| chr14 | 33033199 | 33034610 | 1412 | 944  | 35 | 37.79 | 3.42 | 46.71 |
| chr14 | 33547434 | 33548952 | 1519 | 343  | 33 | 32.92 | 4.11 | 49.33 |
| chr14 | 33649823 | 33651830 | 2008 | 461  | 48 | 40.76 | 4.13 | 46.52 |
| chr14 | 33695981 | 33698623 | 2643 | 617  | 55 | 31.5  | 3.96 | 49.86 |
| chr14 | 33717394 | 33718922 | 1529 | 653  | 34 | 34.25 | 4.03 | 47.91 |
| chr14 | 33752583 | 33754064 | 1482 | 1019 | 32 | 30.67 | 3.88 | 51.07 |
| chr14 | 33899594 | 33901833 | 2240 | 535  | 52 | 39.02 | 4.89 | 46.17 |
| chr14 | 33902446 | 33903504 | 1059 | 311  | 30 | 33.57 | 3.45 | 48.61 |
| chr14 | 33979772 | 33982249 | 2478 | 1768 | 63 | 42.13 | 5.88 | 46.9  |
| chr14 | 34375286 | 34377411 | 2126 | 541  | 51 | 42.22 | 4.93 | 46.97 |
| chr14 | 34949119 | 34949883 | 765  | 272  | 20 | 34.15 | 5.14 | 47.99 |
| chr14 | 35014459 | 35017094 | 2636 | 1038 | 70 | 30.23 | 3.44 | 51.72 |
| chr14 | 35234473 | 35236572 | 2100 | 1348 | 63 | 46.39 | 3.82 | 48.48 |
| chr14 | 35539285 | 35541128 | 1844 | 771  | 47 | 30.9  | 5    | 50.65 |
| chr14 | 35743417 | 35745761 | 2345 | 815  | 66 | 33.6  | 3.64 | 48.7  |
| chr14 | 35825818 | 35826769 | 952  | 676  | 26 | 36.88 | 4.08 | 46.72 |
| chr14 | 35916892 | 35918830 | 1939 | 1506 | 47 | 53.81 | 5.37 | 52.35 |
| chr14 | 36015098 | 36018459 | 3362 | 1287 | 82 | 43.83 | 3.72 | 47.93 |
| chr14 | 36203481 | 36205035 | 1555 | 845  | 46 | 30.68 | 3.68 | 51.03 |
| chr14 | 36448970 | 36451376 | 2407 | 826  | 64 | 50    | 4.67 | 51.83 |
| chr14 | 36585040 | 36587377 | 2338 | 592  | 45 | 30.98 | 3.08 | 50.46 |
| chr14 | 36620264 | 36621771 | 1508 | 1230 | 37 | 31.47 | 4.21 | 49.99 |
| chr14 | 36891361 | 36892830 | 1470 | 958  | 35 | 32.27 | 4.21 | 50.08 |
| chr14 | 37377700 | 37379181 | 1482 | 578  | 43 | 42.93 | 4.48 | 47.41 |
| chr14 | 37575317 | 37576917 | 1601 | 469  | 33 | 32.05 | 3.59 | 49.79 |
| chr14 | 37804713 | 37806641 | 1929 | 580  | 47 | 49.44 | 4.48 | 51.74 |
| chr14 | 37966757 | 37970193 | 3437 | 1386 | 83 | 58.14 | 3.64 | 53.91 |
| chr14 | 38017705 | 38020422 | 2718 | 1948 | 68 | 37.31 | 4.93 | 46.66 |
| chr14 | 38175218 | 38177966 | 2749 | 619  | 62 | 40.34 | 4.28 | 46.92 |
| chr14 | 38206639 | 38208735 | 2097 | 670  | 48 | 33.76 | 4.85 | 48.72 |
| chr14 | 38267109 | 38269434 | 2326 | 1572 | 52 | 53.25 | 5.82 | 51.69 |
| chr14 | 38738087 | 38739335 | 1249 | 722  | 30 | 34.41 | 4.44 | 47.76 |
| chr14 | 38833390 | 38835344 | 1955 | 266  | 41 | 39.89 | 4.03 | 46.57 |
| chr14 | 38935086 | 38936615 | 1530 | 475  | 31 | 32.72 | 3.6  | 49.38 |
| chr14 | 38938243 | 38939650 | 1408 | 1117 | 35 | 40.83 | 3.88 | 46.36 |
| chr14 | 38959061 | 38962243 | 3183 | 2550 | 80 | 61.87 | 4.77 | 54.1  |
| chr14 | 39055710 | 39057200 | 1491 | 937  | 35 | 31.89 | 4.24 | 49.84 |
| chr14 | 39170067 | 39171487 | 1421 | 245  | 34 | 31.61 | 3.3  | 49.96 |
| chr14 | 39175464 | 39176520 | 1057 | 499  | 28 | 37.16 | 4.98 | 46.9  |
| chr14 | 39986510 | 39987834 | 1325 | 640  | 33 | 32.12 | 3.84 | 49.76 |
| chr14 | 40091658 | 40093275 | 1618 | 285  | 31 | 32.84 | 3.28 | 49.38 |
| chr14 | 40121122 | 40122731 | 1610 | 451  | 34 | 32.03 | 3.77 | 49.8  |
| chr14 | 40210024 | 40211106 | 1083 | 504  | 28 | 31.19 | 3.77 | 50.55 |
| chr14 | 40406065 | 40407567 | 1503 | 1035 | 31 | 37.64 | 4.57 | 45.9  |
| chr14 | 40418270 | 40419173 | 904  | 520  | 23 | 31.21 | 4.61 | 50.53 |

|       |          |          |      |      |    |       |      |       |
|-------|----------|----------|------|------|----|-------|------|-------|
| chr14 | 40451620 | 40452849 | 1230 | 529  | 26 | 30.42 | 4.74 | 51.32 |
| chr14 | 40462107 | 40464329 | 2223 | 1540 | 46 | 34.15 | 3.88 | 48.01 |
| chr14 | 40472027 | 40473095 | 1069 | 730  | 24 | 37.01 | 4.83 | 46.93 |
| chr14 | 40544022 | 40545658 | 1637 | 1370 | 32 | 40.54 | 5.34 | 46.89 |
| chr14 | 40575927 | 40577132 | 1206 | 434  | 28 | 45.76 | 6.04 | 50    |
| chr14 | 40649106 | 40649873 | 768  | 395  | 19 | 31.35 | 5.3  | 50.23 |
| chr14 | 40730403 | 40731783 | 1381 | 835  | 30 | 45.56 | 6.57 | 50.04 |
| chr14 | 40858646 | 40860850 | 2205 | 1284 | 56 | 44.72 | 4.14 | 48.8  |
| chr14 | 40939884 | 40941572 | 1689 | 1187 | 36 | 42.88 | 4.57 | 47.32 |
| chr14 | 40967759 | 40968721 | 963  | 586  | 21 | 31.7  | 4.95 | 49.76 |
| chr14 | 41068316 | 41069676 | 1361 | 486  | 31 | 39.37 | 5.3  | 46.85 |
| chr14 | 41131616 | 41133114 | 1499 | 586  | 31 | 32.69 | 4.24 | 49.41 |
| chr14 | 41133521 | 41137231 | 3711 | 1736 | 83 | 31.65 | 3.91 | 49.91 |
| chr14 | 41304289 | 41305169 | 881  | 605  | 19 | 32.03 | 4.52 | 49.73 |
| chr14 | 41312332 | 41313226 | 895  | 514  | 20 | 33.84 | 4.78 | 48.74 |
| chr14 | 41513872 | 41516021 | 2150 | 1581 | 44 | 43    | 5.35 | 47.46 |
| chr14 | 41567811 | 41569055 | 1245 | 421  | 31 | 34.92 | 3.64 | 47.59 |
| chr14 | 41733604 | 41734675 | 1072 | 288  | 28 | 36.24 | 5.29 | 46.95 |
| chr14 | 42007165 | 42008289 | 1125 | 485  | 30 | 34.35 | 5.42 | 47.85 |
| chr14 | 42337782 | 42340359 | 2578 | 906  | 62 | 31.04 | 3.18 | 50.54 |
| chr14 | 42452956 | 42454381 | 1426 | 884  | 40 | 33.88 | 4.4  | 48.61 |
| chr14 | 42491914 | 42493133 | 1220 | 787  | 30 | 32.4  | 4.21 | 49.7  |
| chr14 | 42871297 | 42873072 | 1776 | 972  | 51 | 50    | 4.71 | 51.9  |
| chr14 | 42957202 | 42959824 | 2623 | 760  | 65 | 34.37 | 4.43 | 47.81 |
| chr14 | 43072815 | 43074218 | 1404 | 717  | 34 | 30.09 | 4.64 | 51.54 |
| chr14 | 43125473 | 43127694 | 2222 | 705  | 54 | 33.24 | 4.97 | 48.98 |
| chr14 | 43141054 | 43142474 | 1421 | 1114 | 45 | 40.07 | 4.11 | 46.57 |
| chr14 | 43182297 | 43185801 | 3505 | 2122 | 88 | 40.26 | 4.02 | 46.84 |
| chr14 | 43379503 | 43382242 | 2740 | 1900 | 60 | 46.87 | 4.03 | 47.32 |
| chr14 | 43394425 | 43395622 | 1198 | 324  | 31 | 30.24 | 4.08 | 51.76 |
| chr14 | 43479893 | 43482110 | 2218 | 1186 | 46 | 30.52 | 3.09 | 51.3  |
| chr14 | 43522805 | 43524576 | 1772 | 1323 | 48 | 60.97 | 5.07 | 54.72 |
| chr14 | 43601820 | 43604280 | 2461 | 1628 | 61 | 61.14 | 5.92 | 54.79 |
| chr14 | 43697579 | 43699985 | 2407 | 279  | 58 | 34.63 | 3.81 | 47.74 |
| chr14 | 43834294 | 43836757 | 2464 | 475  | 64 | 32.97 | 4.11 | 49.23 |
| chr14 | 43846966 | 43850515 | 3550 | 2902 | 95 | 39.27 | 3.64 | 46.42 |
| chr14 | 44233640 | 44235488 | 1849 | 748  | 48 | 40.74 | 3.81 | 46.61 |
| chr14 | 44246696 | 44248512 | 1817 | 947  | 51 | 34.32 | 4.79 | 47.79 |
| chr14 | 44514293 | 44515621 | 1329 | 975  | 35 | 34.62 | 4.77 | 47.79 |
| chr14 | 44561631 | 44564196 | 2566 | 779  | 61 | 30.05 | 3.7  | 51.45 |
| chr14 | 44587883 | 44590218 | 2336 | 280  | 63 | 30.36 | 3.45 | 51.63 |
| chr14 | 44654088 | 44656231 | 2144 | 1832 | 53 | 45.42 | 4.28 | 49.71 |
| chr14 | 44803511 | 44805174 | 1664 | 287  | 36 | 38.16 | 4.24 | 46.22 |
| chr14 | 45042322 | 45043194 | 873  | 273  | 24 | 33.31 | 4.01 | 48.78 |
| chr14 | 45298424 | 45299981 | 1558 | 810  | 44 | 66.64 | 7.12 | 54.9  |
| chr14 | 45351145 | 45352430 | 1286 | 717  | 37 | 71.67 | 5.71 | 54.9  |
| chr14 | 45524848 | 45527103 | 2256 | 1320 | 57 | 61.14 | 6.66 | 55    |
| chr14 | 45822505 | 45824255 | 1751 | 506  | 40 | 44.81 | 5.14 | 48.95 |
| chr14 | 45869259 | 45870743 | 1485 | 766  | 34 | 41.64 | 5.77 | 47.15 |
| chr14 | 45997689 | 45999173 | 1485 | 970  | 31 | 31.3  | 4.11 | 50.35 |
| chr14 | 46000364 | 46002391 | 2028 | 693  | 47 | 47.28 | 5.27 | 48.14 |
| chr14 | 46229396 | 46230995 | 1600 | 1326 | 46 | 84.41 | 7.15 | 48.78 |

|       |          |          |      |      |    |       |      |       |
|-------|----------|----------|------|------|----|-------|------|-------|
| chr14 | 46304102 | 46305055 | 954  | 620  | 21 | 33.98 | 5.12 | 48.56 |
| chr14 | 46344263 | 46345416 | 1154 | 864  | 25 | 32.44 | 4.52 | 49.54 |
| chr14 | 46389946 | 46391318 | 1373 | 678  | 33 | 47.3  | 6.4  | 48.1  |
| chr14 | 46427611 | 46429351 | 1741 | 957  | 45 | 56.77 | 5.98 | 53.06 |
| chr14 | 46470431 | 46473451 | 3021 | 1515 | 71 | 39.76 | 3.95 | 46.71 |
| chr14 | 46480593 | 46481605 | 1013 | 276  | 21 | 33.06 | 5.34 | 49.12 |
| chr14 | 46560846 | 46562409 | 1564 | 743  | 46 | 81.97 | 4.69 | 48.98 |
| chr14 | 46761697 | 46763387 | 1691 | 580  | 31 | 37.72 | 3.92 | 46.56 |
| chr14 | 46775627 | 46777411 | 1785 | 616  | 49 | 37.02 | 4.89 | 46.97 |
| chr14 | 46869841 | 46870575 | 735  | 387  | 18 | 32.83 | 5.33 | 49.39 |
| chr14 | 46871720 | 46872976 | 1257 | 668  | 26 | 33    | 4.67 | 49.16 |
| chr14 | 47058232 | 47059865 | 1634 | 1124 | 39 | 44.01 | 5.6  | 48.06 |
| chr14 | 47076060 | 47077522 | 1463 | 1177 | 32 | 40.77 | 4.79 | 46.57 |
| chr14 | 47276265 | 47277097 | 833  | 290  | 19 | 34.81 | 5.34 | 47.51 |
| chr14 | 47396741 | 47397879 | 1139 | 530  | 26 | 42.05 | 5.71 | 47.06 |
| chr14 | 47514669 | 47515608 | 940  | 657  | 21 | 34.78 | 4.33 | 47.6  |
| chr14 | 47544498 | 47545492 | 995  | 278  | 20 | 30.06 | 4.11 | 51.48 |
| chr14 | 47566982 | 47568783 | 1802 | 1338 | 45 | 50.92 | 4.87 | 51.9  |
| chr14 | 47637030 | 47639034 | 2005 | 1737 | 42 | 31.76 | 4.68 | 49.86 |
| chr14 | 47663296 | 47665131 | 1836 | 1202 | 37 | 33.06 | 4.19 | 49.15 |
| chr14 | 47702162 | 47704035 | 1874 | 643  | 40 | 41.56 | 4.24 | 47.17 |
| chr14 | 47863900 | 47865435 | 1536 | 978  | 37 | 61.15 | 4.89 | 55.21 |
| chr14 | 47945354 | 47946664 | 1311 | 657  | 31 | 37.77 | 5.32 | 46.63 |
| chr14 | 48279945 | 48280852 | 908  | 243  | 20 | 30.8  | 4.19 | 51.03 |
| chr14 | 48292546 | 48293680 | 1135 | 543  | 24 | 30.39 | 4.57 | 51.62 |
| chr14 | 48329171 | 48330306 | 1136 | 568  | 24 | 34.6  | 5.34 | 47.74 |
| chr14 | 48580424 | 48581114 | 691  | 266  | 18 | 31.72 | 4.19 | 49.74 |
| chr14 | 48601207 | 48603695 | 2489 | 577  | 57 | 47.44 | 5.29 | 48.51 |
| chr14 | 48760049 | 48762337 | 2289 | 1678 | 47 | 31.17 | 4.36 | 50.55 |
| chr14 | 48820023 | 48821966 | 1944 | 1391 | 38 | 48.15 | 4.93 | 49.41 |
| chr14 | 48974280 | 48975625 | 1346 | 693  | 34 | 36.68 | 4.59 | 46.9  |
| chr14 | 49227097 | 49229051 | 1955 | 1448 | 52 | 79.14 | 4.99 | 59.32 |
| chr14 | 49542803 | 49544311 | 1509 | 278  | 32 | 32.69 | 3.05 | 49.41 |
| chr14 | 49648959 | 49649829 | 871  | 273  | 21 | 37.09 | 4.95 | 46.95 |
| chr14 | 49685394 | 49686886 | 1493 | 955  | 32 | 34.8  | 3.46 | 47.53 |
| chr14 | 50508962 | 50509892 | 931  | 554  | 20 | 30.12 | 4.62 | 51.63 |
| chr14 | 51133450 | 51136272 | 2823 | 2065 | 63 | 30.04 | 3.63 | 51.45 |
| chr14 | 51233496 | 51234526 | 1031 | 330  | 30 | 30.48 | 3.7  | 51.27 |
| chr14 | 51358870 | 51360619 | 1750 | 1473 | 35 | 40.06 | 4.19 | 46.59 |
| chr14 | 51375584 | 51376455 | 872  | 286  | 21 | 31.38 | 4.79 | 50.23 |
| chr14 | 51625783 | 51628273 | 2491 | 1934 | 60 | 30.06 | 4.16 | 51.46 |
| chr14 | 51644961 | 51646936 | 1976 | 582  | 47 | 30.8  | 4.55 | 51.02 |
| chr14 | 51724315 | 51727644 | 3330 | 1446 | 93 | 35    | 3.6  | 47.64 |
| chr14 | 52058615 | 52060059 | 1445 | 864  | 37 | 35.86 | 3.71 | 46.99 |
| chr14 | 52084448 | 52086098 | 1651 | 802  | 44 | 59.46 | 4.7  | 55.52 |
| chr14 | 52146538 | 52148433 | 1896 | 1032 | 47 | 32.96 | 3.95 | 49.26 |
| chr14 | 52807808 | 52809707 | 1900 | 843  | 40 | 36.24 | 3.69 | 46.95 |
| chr14 | 52883467 | 52885149 | 1683 | 1042 | 40 | 39.25 | 3.7  | 46.37 |
| chr14 | 52897495 | 52898758 | 1264 | 1006 | 32 | 32.46 | 3.96 | 49.45 |
| chr14 | 53600936 | 53604191 | 3256 | 2472 | 70 | 31.03 | 4.01 | 50.48 |
| chr14 | 53716730 | 53717689 | 960  | 257  | 24 | 33.83 | 4.45 | 48.74 |
| chr14 | 53760175 | 53761259 | 1085 | 464  | 23 | 33.29 | 6.16 | 48.83 |



|       |          |          |      |      |     |       |      |       |
|-------|----------|----------|------|------|-----|-------|------|-------|
| chr14 | 54049321 | 54050628 | 1308 | 623  | 31  | 31.04 | 4.81 | 50.53 |
| chr14 | 54467702 | 54468915 | 1214 | 593  | 27  | 32.16 | 4.89 | 49.87 |
| chr14 | 54691207 | 54692732 | 1526 | 678  | 41  | 36.67 | 3.66 | 47.01 |
| chr14 | 54708022 | 54709865 | 1844 | 1060 | 42  | 44.21 | 4.65 | 48.08 |
| chr14 | 54834938 | 54837155 | 2218 | 1514 | 46  | 40.56 | 6.04 | 46.9  |
| chr14 | 55050411 | 55056176 | 5766 | 742  | 135 | 70.34 | 5.15 | 53.51 |
| chr14 | 55385291 | 55387076 | 1786 | 1184 | 36  | 36.8  | 5.21 | 46.78 |
| chr14 | 55459013 | 55460791 | 1779 | 883  | 51  | 36.89 | 3.45 | 46.7  |
| chr14 | 56501088 | 56502794 | 1707 | 940  | 39  | 57.29 | 4.38 | 53.61 |
| chr14 | 56729606 | 56730390 | 785  | 338  | 20  | 33.34 | 4.15 | 48.7  |
| chr14 | 56733525 | 56735139 | 1615 | 1034 | 33  | 36.61 | 3.36 | 46.95 |
| chr14 | 56902502 | 56903953 | 1452 | 646  | 37  | 33.04 | 3.87 | 49.11 |
| chr14 | 56969475 | 56970814 | 1340 | 577  | 30  | 34.85 | 5.48 | 47.6  |
| chr14 | 57355029 | 57357157 | 2129 | 656  | 44  | 32.02 | 4.05 | 49.76 |
| chr14 | 57605397 | 57608379 | 2983 | 1462 | 61  | 31.84 | 3.71 | 49.72 |
| chr14 | 57613972 | 57614676 | 705  | 420  | 20  | 48.75 | 4.93 | 50.53 |
| chr14 | 57661230 | 57663190 | 1961 | 1389 | 48  | 32.64 | 3.42 | 49.31 |
| chr14 | 57856609 | 57859582 | 2974 | 659  | 75  | 37.64 | 4.49 | 45.91 |
| chr14 | 57968811 | 57969714 | 904  | 282  | 24  | 46.58 | 6.37 | 47.72 |
| chr14 | 58111517 | 58112801 | 1285 | 1004 | 31  | 45.15 | 5.41 | 48.87 |
| chr14 | 58124954 | 58125856 | 903  | 357  | 20  | 34.99 | 4.11 | 47.57 |
| chr14 | 58704544 | 58707361 | 2818 | 1020 | 79  | 62.16 | 4.06 | 54.01 |
| chr14 | 58982619 | 58984836 | 2218 | 1273 | 52  | 34.53 | 3.26 | 47.73 |
| chr14 | 59222692 | 59223681 | 990  | 726  | 21  | 30.28 | 4.57 | 51.66 |
| chr14 | 59303302 | 59304708 | 1407 | 519  | 38  | 63.13 | 5.1  | 53.7  |
| chr14 | 59321944 | 59323660 | 1717 | 1108 | 43  | 42.3  | 5.15 | 47.4  |
| chr14 | 59433600 | 59434520 | 921  | 282  | 22  | 38.23 | 6.16 | 46.31 |
| chr14 | 59452981 | 59454050 | 1070 | 794  | 26  | 35    | 6.16 | 47.6  |
| chr14 | 59478033 | 59479268 | 1236 | 572  | 29  | 30.62 | 5.92 | 51.19 |
| chr14 | 59560350 | 59561796 | 1447 | 714  | 37  | 40.46 | 5.46 | 46.88 |
| chr14 | 59850457 | 59852093 | 1637 | 954  | 40  | 34.5  | 5.09 | 47.64 |
| chr14 | 59993118 | 59996070 | 2953 | 1617 | 59  | 42.22 | 4.57 | 46.94 |
| chr14 | 60074195 | 60075156 | 962  | 456  | 28  | 32.52 | 5.01 | 49.38 |
| chr14 | 60129590 | 60131064 | 1475 | 647  | 34  | 34.07 | 4.2  | 48.26 |
| chr14 | 60210278 | 60211706 | 1429 | 676  | 33  | 30.03 | 5.24 | 51.48 |
| chr14 | 60218550 | 60220217 | 1668 | 1384 | 36  | 30.18 | 3.81 | 51.67 |
| chr14 | 60259248 | 60260307 | 1060 | 329  | 24  | 31.17 | 4.33 | 50.54 |
| chr14 | 60277585 | 60279900 | 2316 | 686  | 52  | 60.63 | 5.65 | 55.35 |
| chr14 | 60386767 | 60388425 | 1659 | 906  | 45  | 41.83 | 4.89 | 46.99 |
| chr14 | 60400451 | 60402535 | 2085 | 584  | 42  | 32.15 | 4.57 | 49.95 |
| chr14 | 60464868 | 60466336 | 1469 | 822  | 35  | 36.9  | 4.16 | 46.75 |
| chr14 | 60552282 | 60554860 | 2579 | 538  | 62  | 41.12 | 4.04 | 46.37 |
| chr14 | 60594175 | 60595930 | 1756 | 285  | 45  | 34.13 | 3.95 | 48.1  |
| chr14 | 60822108 | 60823720 | 1613 | 921  | 43  | 44.79 | 4.1  | 49.02 |
| chr14 | 60942052 | 60944538 | 2487 | 748  | 59  | 39.19 | 4.44 | 46.25 |
| chr14 | 61805059 | 61806000 | 942  | 662  | 24  | 30.61 | 3.81 | 51.2  |
| chr14 | 61872330 | 61874314 | 1985 | 642  | 39  | 31.51 | 4.79 | 49.89 |
| chr14 | 62147456 | 62151355 | 3900 | 3085 | 90  | 33.22 | 3.81 | 49.16 |
| chr14 | 62198630 | 62202264 | 3635 | 756  | 98  | 30.29 | 4.18 | 51.67 |
| chr14 | 62645715 | 62647345 | 1631 | 555  | 37  | 37.56 | 4.61 | 45.97 |
| chr14 | 62842476 | 62844750 | 2275 | 396  | 60  | 32.12 | 3.88 | 49.77 |
| chr14 | 62894601 | 62895507 | 907  | 269  | 22  | 36.72 | 5.9  | 47.02 |

|       |          |          |      |      |    |       |      |       |
|-------|----------|----------|------|------|----|-------|------|-------|
| chr14 | 62895537 | 62896911 | 1375 | 575  | 30 | 40.33 | 4.95 | 46.83 |
| chr14 | 62910690 | 62912296 | 1607 | 517  | 33 | 52.75 | 3.5  | 50.57 |
| chr14 | 63081075 | 63081941 | 867  | 555  | 24 | 34.21 | 4.98 | 47.95 |
| chr14 | 63193095 | 63194389 | 1295 | 553  | 35 | 31.95 | 4.48 | 49.77 |
| chr14 | 63195298 | 63196874 | 1577 | 1043 | 36 | 39.19 | 5.76 | 46.27 |
| chr14 | 63211080 | 63212407 | 1328 | 798  | 35 | 39.73 | 4.51 | 46.62 |
| chr14 | 63222928 | 63224556 | 1629 | 1040 | 33 | 40.9  | 4.52 | 46.33 |
| chr14 | 63323075 | 63324169 | 1095 | 443  | 25 | 40.85 | 5.34 | 46.35 |
| chr14 | 63384703 | 63386491 | 1789 | 1402 | 43 | 33.71 | 4    | 48.62 |
| chr14 | 63722830 | 63723807 | 978  | 611  | 24 | 37.59 | 5.58 | 45.85 |
| chr14 | 63726310 | 63727678 | 1369 | 616  | 36 | 49.94 | 8.06 | 51.69 |
| chr14 | 63882486 | 63885115 | 2630 | 595  | 65 | 40.49 | 3.66 | 46.97 |
| chr14 | 64193153 | 64195454 | 2302 | 1240 | 70 | 30.23 | 4.13 | 51.72 |
| chr14 | 64565429 | 64568710 | 3282 | 2780 | 70 | 50.2  | 4.67 | 51.38 |
| chr14 | 65082756 | 65084523 | 1768 | 1173 | 44 | 32.17 | 4.01 | 49.94 |
| chr14 | 65139713 | 65140582 | 870  | 617  | 19 | 31.14 | 3.98 | 50.63 |
| chr14 | 65963324 | 65964758 | 1435 | 1181 | 31 | 30.36 | 3.26 | 51.65 |
| chr14 | 65965043 | 65966198 | 1156 | 491  | 29 | 34.88 | 4.98 | 47.68 |
| chr14 | 66113255 | 66115950 | 2696 | 1271 | 65 | 40.15 | 4.18 | 46.71 |
| chr14 | 66139941 | 66142074 | 2134 | 669  | 48 | 37.98 | 4.57 | 46.39 |
| chr14 | 66532307 | 66533653 | 1347 | 564  | 31 | 31.45 | 4.05 | 50.04 |
| chr14 | 67090830 | 67091862 | 1033 | 622  | 27 | 34.97 | 4.05 | 47.61 |
| chr14 | 67147722 | 67149902 | 2181 | 849  | 49 | 32.9  | 5.14 | 49.34 |
| chr14 | 67179070 | 67180355 | 1286 | 576  | 31 | 34.54 | 3.74 | 47.75 |
| chr14 | 67294271 | 67295563 | 1293 | 848  | 36 | 46.86 | 4.89 | 47.28 |
| chr14 | 67321691 | 67322836 | 1146 | 699  | 27 | 36.35 | 6    | 47.11 |
| chr14 | 67917179 | 67918117 | 939  | 316  | 24 | 41.36 | 6.09 | 46.98 |
| chr14 | 68148516 | 68150940 | 2425 | 866  | 72 | 57.46 | 3.81 | 53.79 |
| chr14 | 68436730 | 68439538 | 2809 | 1341 | 79 | 58.26 | 4.43 | 54.15 |
| chr14 | 68474215 | 68476925 | 2711 | 1108 | 69 | 42.48 | 3.53 | 47.27 |
| chr14 | 68640656 | 68642351 | 1696 | 1408 | 40 | 30.02 | 4.15 | 51.48 |
| chr14 | 68673078 | 68674437 | 1360 | 420  | 36 | 37.96 | 4.03 | 46.5  |
| chr14 | 68725110 | 68726650 | 1541 | 255  | 34 | 31.69 | 3.26 | 49.77 |
| chr14 | 68730117 | 68733998 | 3882 | 1620 | 92 | 39.39 | 3.42 | 46.93 |
| chr14 | 69226941 | 69227825 | 885  | 243  | 20 | 36.04 | 4.52 | 46.89 |
| chr14 | 69331669 | 69332823 | 1155 | 535  | 30 | 36.03 | 4.81 | 46.94 |
| chr14 | 69544280 | 69546111 | 1832 | 759  | 46 | 30.15 | 3.55 | 51.66 |
| chr14 | 69856510 | 69858646 | 2137 | 1700 | 60 | 51.07 | 4.09 | 51.7  |
| chr14 | 69940999 | 69942257 | 1259 | 802  | 30 | 39.11 | 4.45 | 46.31 |
| chr14 | 70452226 | 70453255 | 1030 | 251  | 24 | 34.58 | 4.09 | 47.69 |
| chr14 | 70552399 | 70553171 | 773  | 486  | 18 | 30.99 | 4.62 | 50.47 |
| chr14 | 70817101 | 70818891 | 1791 | 825  | 49 | 51.92 | 4    | 51.04 |
| chr14 | 70901649 | 70902926 | 1278 | 594  | 28 | 36.43 | 7.07 | 47.19 |
| chr14 | 71166474 | 71168260 | 1787 | 1148 | 44 | 63.12 | 6.4  | 53.21 |
| chr14 | 71348521 | 71350611 | 2091 | 311  | 48 | 34.01 | 3.42 | 48.56 |
| chr14 | 71412476 | 71414029 | 1554 | 497  | 40 | 38.03 | 3.93 | 46.42 |
| chr14 | 71576647 | 71578664 | 2018 | 556  | 49 | 45.82 | 3.94 | 49.89 |
| chr14 | 71690799 | 71692514 | 1716 | 941  | 37 | 45.14 | 4.95 | 48.87 |
| chr14 | 71880303 | 71881595 | 1293 | 734  | 33 | 51.23 | 4.84 | 51.32 |
| chr14 | 71893116 | 71894690 | 1575 | 561  | 33 | 31.16 | 4.15 | 50.56 |
| chr14 | 72210758 | 72212277 | 1520 | 483  | 32 | 32.88 | 4.11 | 49.32 |
| chr14 | 72354037 | 72355412 | 1376 | 571  | 32 | 41.44 | 5.24 | 46.97 |

|       |          |          |      |      |    |       |      |       |
|-------|----------|----------|------|------|----|-------|------|-------|
| chr14 | 72580030 | 72580851 | 822  | 562  | 24 | 43.06 | 5.82 | 47.28 |
| chr14 | 72652952 | 72653918 | 967  | 309  | 20 | 31.1  | 5.3  | 50.63 |
| chr14 | 72732204 | 72733041 | 838  | 329  | 18 | 30.27 | 6.16 | 51.68 |
| chr14 | 73136483 | 73137234 | 752  | 461  | 17 | 30.95 | 6.57 | 50.53 |
| chr14 | 73448816 | 73450190 | 1375 | 761  | 32 | 31.4  | 4.24 | 50.21 |
| chr14 | 73565354 | 73566918 | 1565 | 761  | 41 | 35.24 | 4.48 | 47.31 |
| chr14 | 73591578 | 73593493 | 1916 | 1086 | 48 | 30.19 | 3.25 | 51.75 |
| chr14 | 74069346 | 74070267 | 922  | 280  | 24 | 31.79 | 3.81 | 49.84 |
| chr14 | 74624537 | 74626055 | 1519 | 717  | 39 | 35.53 | 6.35 | 47.23 |
| chr14 | 74638254 | 74639898 | 1645 | 600  | 35 | 31.09 | 3.81 | 50.64 |
| chr14 | 74929646 | 74930690 | 1045 | 416  | 23 | 31.19 | 4.95 | 50.51 |
| chr14 | 74967659 | 74969036 | 1378 | 624  | 35 | 31.27 | 4.72 | 50.45 |
| chr14 | 75161147 | 75163322 | 2176 | 1506 | 62 | 58.67 | 4.21 | 52.52 |
| chr14 | 75970713 | 75972436 | 1724 | 415  | 41 | 36.64 | 4.13 | 47.01 |
| chr14 | 76066616 | 76068533 | 1918 | 1345 | 41 | 44.64 | 5.05 | 48.91 |
| chr14 | 76139887 | 76142515 | 2629 | 2263 | 69 | 34.11 | 4.36 | 48.11 |
| chr14 | 76360045 | 76361996 | 1952 | 1129 | 48 | 35.07 | 4.31 | 47.38 |
| chr14 | 76877411 | 76878249 | 839  | 214  | 21 | 43.57 | 4.52 | 47.96 |
| chr14 | 77039721 | 77040590 | 870  | 629  | 19 | 32.65 | 5.34 | 49.31 |
| chr14 | 77159089 | 77159871 | 783  | 282  | 20 | 37.91 | 5.65 | 46.61 |
| chr14 | 77358946 | 77360486 | 1541 | 715  | 35 | 43.17 | 5.83 | 47.47 |
| chr14 | 77654551 | 77655869 | 1319 | 623  | 29 | 33.82 | 4.54 | 48.83 |
| chr14 | 78045809 | 78047420 | 1612 | 936  | 44 | 31.82 | 4.13 | 49.81 |
| chr14 | 78128861 | 78129714 | 854  | 569  | 23 | 35.94 | 5.43 | 47.07 |
| chr14 | 78142294 | 78145473 | 3180 | 968  | 73 | 52.69 | 4.13 | 50.64 |
| chr14 | 78296613 | 78297907 | 1295 | 514  | 29 | 44.81 | 4.83 | 48.91 |
| chr14 | 78606440 | 78607363 | 924  | 391  | 21 | 35.71 | 4.72 | 47.25 |
| chr14 | 78818207 | 78819440 | 1234 | 679  | 25 | 33.62 | 6.16 | 48.71 |
| chr14 | 78996260 | 78997492 | 1233 | 447  | 33 | 57.93 | 6.16 | 53.28 |
| chr14 | 79369302 | 79371942 | 2641 | 359  | 60 | 58.81 | 3.84 | 52.12 |
| chr14 | 80046097 | 80047471 | 1375 | 676  | 30 | 41.93 | 5.84 | 46.99 |
| chr14 | 80051108 | 80052061 | 954  | 315  | 21 | 33.37 | 4.67 | 48.69 |
| chr14 | 80145173 | 80146007 | 835  | 569  | 19 | 30.93 | 3.81 | 50.58 |
| chr14 | 80340764 | 80342102 | 1339 | 611  | 28 | 32.12 | 5.1  | 49.73 |
| chr14 | 80544716 | 80545678 | 963  | 268  | 23 | 36.3  | 5.39 | 46.97 |
| chr14 | 80699818 | 80702071 | 2254 | 1548 | 49 | 37.75 | 4.98 | 46.65 |
| chr14 | 80738794 | 80741660 | 2867 | 598  | 65 | 45.44 | 3.87 | 49.67 |
| chr14 | 80764095 | 80765613 | 1519 | 1100 | 40 | 34.74 | 3.95 | 47.64 |
| chr14 | 81068178 | 81070561 | 2384 | 631  | 71 | 59.88 | 4.37 | 56.84 |
| chr14 | 81106862 | 81108258 | 1397 | 780  | 39 | 37.83 | 4.18 | 46.69 |
| chr14 | 81261225 | 81263923 | 2699 | 1298 | 65 | 31.47 | 3.7  | 50    |
| chr14 | 81308265 | 81310927 | 2663 | 367  | 76 | 39.84 | 3.88 | 46.63 |
| chr14 | 81877700 | 81878946 | 1247 | 578  | 29 | 32.39 | 4.52 | 49.76 |
| chr14 | 82271442 | 82272342 | 901  | 457  | 25 | 30.78 | 5.14 | 50.98 |
| chr14 | 82361658 | 82362487 | 830  | 279  | 20 | 34.25 | 5.21 | 47.9  |
| chr14 | 82386438 | 82388337 | 1900 | 1135 | 50 | 48.96 | 4.57 | 50.32 |
| chr14 | 82538602 | 82539623 | 1022 | 427  | 21 | 32.59 | 4.52 | 49.35 |
| chr14 | 82666510 | 82668876 | 2367 | 1547 | 51 | 76.74 | 6.98 | 54.17 |
| chr14 | 82704273 | 82705343 | 1071 | 630  | 22 | 30.16 | 4.11 | 51.62 |
| chr14 | 82706758 | 82708692 | 1935 | 1144 | 40 | 37.85 | 5.58 | 46.82 |
| chr14 | 83227536 | 83229311 | 1776 | 974  | 45 | 33.19 | 4.21 | 49.05 |
| chr14 | 83252432 | 83253454 | 1023 | 429  | 27 | 38.55 | 4.89 | 46.26 |

|       |          |          |      |      |     |        |       |       |
|-------|----------|----------|------|------|-----|--------|-------|-------|
| chr14 | 83277177 | 83278395 | 1219 | 465  | 27  | 34.45  | 5.46  | 47.76 |
| chr14 | 83373349 | 83374823 | 1475 | 775  | 33  | 32.91  | 4.99  | 49.32 |
| chr14 | 83556313 | 83557167 | 855  | 597  | 21  | 30.87  | 5.65  | 50.8  |
| chr14 | 83563339 | 83564249 | 911  | 407  | 22  | 38.84  | 5.34  | 46.22 |
| chr14 | 83647375 | 83648939 | 1565 | 1313 | 36  | 33.35  | 3.42  | 48.69 |
| chr14 | 83664437 | 83665968 | 1532 | 930  | 36  | 42.26  | 6.51  | 47.22 |
| chr14 | 83680887 | 83681914 | 1028 | 265  | 24  | 32.28  | 3.92  | 50.07 |
| chr14 | 83748618 | 83750813 | 2196 | 376  | 47  | 42.63  | 4.61  | 47.39 |
| chr14 | 83931487 | 83934056 | 2570 | 1040 | 58  | 34.2   | 4.14  | 47.91 |
| chr14 | 83953214 | 83955657 | 2444 | 749  | 53  | 39.1   | 5.81  | 46.39 |
| chr14 | 84046870 | 84048233 | 1364 | 713  | 36  | 68.61  | 6.98  | 56.25 |
| chr14 | 84058180 | 84059063 | 884  | 609  | 22  | 31.72  | 4.54  | 49.74 |
| chr14 | 84127810 | 84129966 | 2157 | 850  | 47  | 36.25  | 4.05  | 46.91 |
| chr14 | 84282633 | 84284253 | 1621 | 579  | 37  | 41.15  | 4.45  | 46.43 |
| chr14 | 84630237 | 84631027 | 791  | 274  | 20  | 31.94  | 3.73  | 49.76 |
| chr14 | 84672708 | 84674174 | 1467 | 624  | 33  | 35.33  | 3.08  | 47.46 |
| chr14 | 84705063 | 84706452 | 1390 | 763  | 32  | 32.48  | 5.6   | 49.5  |
| chr14 | 84863847 | 84865165 | 1319 | 699  | 58  | 143.85 | 17.28 | 18.75 |
| chr14 | 84890915 | 84892473 | 1559 | 1251 | 38  | 47.95  | 4.45  | 49.38 |
| chr14 | 85097579 | 85099214 | 1636 | 926  | 41  | 53.73  | 4.75  | 52.14 |
| chr14 | 85100513 | 85102606 | 2094 | 1276 | 50  | 59.32  | 5.53  | 54.61 |
| chr14 | 85188596 | 85190100 | 1505 | 990  | 39  | 65.15  | 6.47  | 54.49 |
| chr14 | 85306270 | 85308055 | 1786 | 556  | 40  | 35.88  | 3.77  | 47.05 |
| chr14 | 85386655 | 85387820 | 1166 | 517  | 28  | 44.11  | 5.33  | 48.05 |
| chr14 | 85465947 | 85467586 | 1640 | 509  | 32  | 40.4   | 4.52  | 46.79 |
| chr14 | 85598841 | 85600259 | 1419 | 784  | 30  | 31.75  | 4.84  | 49.81 |
| chr14 | 85622380 | 85623202 | 823  | 236  | 20  | 33.58  | 4.01  | 48.64 |
| chr14 | 85683376 | 85684405 | 1030 | 745  | 23  | 36.18  | 5.34  | 46.84 |
| chr14 | 85697749 | 85698638 | 890  | 549  | 19  | 31.54  | 4.52  | 49.9  |
| chr14 | 86203055 | 86204413 | 1359 | 844  | 29  | 42.74  | 6.98  | 47.52 |
| chr14 | 86492360 | 86493438 | 1079 | 615  | 26  | 31.05  | 4.85  | 50.59 |
| chr14 | 86514681 | 86515997 | 1317 | 351  | 37  | 38.66  | 4.04  | 46.06 |
| chr14 | 86615118 | 86617236 | 2119 | 1385 | 59  | 74.04  | 4.98  | 59.26 |
| chr14 | 86850350 | 86852710 | 2361 | 1026 | 50  | 31.61  | 3.17  | 49.94 |
| chr14 | 86866187 | 86867415 | 1229 | 956  | 32  | 36.75  | 4.39  | 46.98 |
| chr14 | 86911072 | 86912283 | 1212 | 520  | 29  | 31.85  | 3.74  | 49.76 |
| chr14 | 87054089 | 87055658 | 1570 | 1310 | 39  | 34.22  | 4.49  | 47.92 |
| chr14 | 87199524 | 87200621 | 1098 | 454  | 28  | 34.13  | 5.24  | 48.11 |
| chr14 | 87236647 | 87238505 | 1859 | 766  | 48  | 30.89  | 3.18  | 50.64 |
| chr14 | 87302531 | 87304708 | 2178 | 679  | 54  | 41.25  | 4.73  | 46.81 |
| chr14 | 87689082 | 87691041 | 1960 | 587  | 45  | 32.91  | 4.49  | 49.29 |
| chr14 | 87911518 | 87913713 | 2196 | 1262 | 50  | 35.59  | 3.74  | 47.19 |
| chr14 | 88210294 | 88211749 | 1456 | 891  | 38  | 31.12  | 3.63  | 50.71 |
| chr14 | 88244958 | 88246910 | 1953 | 1713 | 44  | 37.78  | 3.67  | 46.66 |
| chr14 | 88331428 | 88332547 | 1120 | 463  | 28  | 34.61  | 6.34  | 47.74 |
| chr14 | 88457372 | 88460880 | 3509 | 1844 | 111 | 53.49  | 4.69  | 52.09 |
| chr14 | 88634589 | 88637900 | 3312 | 2462 | 71  | 34.66  | 4.42  | 47.74 |
| chr14 | 89093232 | 89094638 | 1407 | 923  | 38  | 44.74  | 4.76  | 48.93 |
| chr14 | 89104425 | 89105658 | 1234 | 696  | 29  | 33.66  | 4.89  | 48.66 |
| chr14 | 89219198 | 89221899 | 2702 | 2154 | 63  | 43.24  | 3.95  | 47.73 |
| chr14 | 89294599 | 89295906 | 1308 | 564  | 34  | 32.65  | 4.77  | 49.36 |
| chr14 | 89385355 | 89386824 | 1470 | 776  | 35  | 50.59  | 6.85  | 51.71 |

|       |          |          |      |      |     |       |      |       |
|-------|----------|----------|------|------|-----|-------|------|-------|
| chr14 | 89391067 | 89391867 | 801  | 530  | 20  | 30.81 | 4.7  | 50.98 |
| chr14 | 89467470 | 89468874 | 1405 | 614  | 32  | 52.48 | 4.93 | 50.62 |
| chr14 | 89509560 | 89511382 | 1823 | 439  | 44  | 55.53 | 4.99 | 53.81 |
| chr14 | 89990581 | 89992477 | 1897 | 431  | 40  | 49.58 | 6.02 | 51.23 |
| chr14 | 90388017 | 90389782 | 1766 | 401  | 46  | 43.65 | 4.57 | 48    |
| chr14 | 90401393 | 90402892 | 1500 | 643  | 37  | 30.68 | 3.87 | 51.03 |
| chr14 | 90475591 | 90477453 | 1863 | 471  | 44  | 32.48 | 3.4  | 49.47 |
| chr14 | 90680624 | 90681335 | 712  | 350  | 19  | 37.8  | 5.21 | 46.66 |
| chr14 | 90815540 | 90817242 | 1703 | 1081 | 39  | 48.32 | 3.97 | 49.6  |
| chr14 | 90927050 | 90927973 | 924  | 558  | 30  | 71.94 | 9.51 | 57.73 |
| chr14 | 91040365 | 91040925 | 561  | 280  | 15  | 37.66 | 6.16 | 46.06 |
| chr14 | 91164064 | 91165331 | 1268 | 312  | 34  | 30.43 | 3.42 | 51.29 |
| chr14 | 91394491 | 91397452 | 2962 | 782  | 63  | 37.33 | 3.84 | 46.68 |
| chr14 | 91399337 | 91401302 | 1966 | 1234 | 43  | 39.41 | 5.37 | 47.01 |
| chr14 | 91799300 | 91800603 | 1304 | 721  | 28  | 35.84 | 7.9  | 47    |
| chr14 | 91940820 | 91944004 | 3185 | 403  | 73  | 32.74 | 3.39 | 49.37 |
| chr14 | 92045438 | 92046478 | 1041 | 580  | 21  | 30.03 | 5.18 | 51.47 |
| chr14 | 92059919 | 92062047 | 2129 | 640  | 48  | 37.76 | 5.15 | 46.64 |
| chr14 | 92078111 | 92080074 | 1964 | 520  | 47  | 43.2  | 4.89 | 47.57 |
| chr14 | 92122731 | 92124280 | 1550 | 1275 | 33  | 31.56 | 4.11 | 49.96 |
| chr14 | 92246978 | 92249291 | 2314 | 1629 | 67  | 30.86 | 4.23 | 50.85 |
| chr14 | 92372890 | 92374359 | 1470 | 719  | 32  | 33.81 | 4.03 | 48.88 |
| chr14 | 92403039 | 92403956 | 918  | 569  | 19  | 30.05 | 3.7  | 51.47 |
| chr14 | 92472440 | 92473833 | 1394 | 718  | 42  | 45.73 | 6.9  | 49.92 |
| chr14 | 92731194 | 92732078 | 885  | 330  | 22  | 40.48 | 5.75 | 46.93 |
| chr14 | 93188170 | 93189342 | 1173 | 606  | 25  | 32.13 | 4.95 | 49.82 |
| chr14 | 93253693 | 93256018 | 2326 | 521  | 57  | 39.31 | 4.31 | 46.57 |
| chr14 | 93256306 | 93261718 | 5413 | 1152 | 124 | 44.58 | 2.85 | 48.88 |
| chr14 | 93444505 | 93445466 | 962  | 587  | 20  | 30.77 | 4.43 | 50.99 |
| chr14 | 93567485 | 93569007 | 1523 | 1002 | 34  | 49.99 | 6.16 | 51.77 |
| chr14 | 93707203 | 93709210 | 2008 | 1601 | 51  | 94.43 | 6.57 | 32.14 |
| chr14 | 93754518 | 93755534 | 1017 | 290  | 36  | 48.29 | 4.16 | 49.36 |
| chr14 | 93762518 | 93764862 | 2345 | 2104 | 54  | 46.15 | 3.98 | 49.14 |
| chr14 | 93768735 | 93770324 | 1590 | 610  | 37  | 38.8  | 4.89 | 46.11 |
| chr14 | 94085120 | 94087704 | 2585 | 1124 | 65  | 35.71 | 3.44 | 47.23 |
| chr14 | 94096061 | 94097570 | 1510 | 487  | 39  | 53.7  | 5.43 | 51.96 |
| chr14 | 94122458 | 94124572 | 2115 | 1007 | 48  | 34.48 | 3.19 | 47.74 |
| chr14 | 94328319 | 94329999 | 1681 | 609  | 33  | 36.36 | 3.58 | 47.18 |
| chr14 | 94443880 | 94445987 | 2108 | 1728 | 51  | 32.46 | 3.37 | 49.45 |
| chr14 | 94525082 | 94527527 | 2446 | 507  | 56  | 67.57 | 5.58 | 54.23 |
| chr14 | 94813013 | 94814142 | 1130 | 563  | 24  | 34.91 | 5.75 | 47.61 |
| chr14 | 94851359 | 94852271 | 913  | 241  | 20  | 32.82 | 3.98 | 49.44 |
| chr14 | 95083283 | 95084278 | 996  | 286  | 21  | 33.95 | 6.57 | 48.63 |
| chr14 | 95494700 | 95496855 | 2156 | 729  | 49  | 59.46 | 5.52 | 55.33 |
| chr14 | 95499585 | 95501804 | 2220 | 391  | 53  | 30.52 | 4.05 | 51.3  |
| chr14 | 95980843 | 95982998 | 2156 | 1340 | 56  | 42.2  | 3.96 | 47.02 |
| chr14 | 96257200 | 96258306 | 1107 | 827  | 24  | 31.76 | 4.19 | 49.85 |
| chr14 | 96371847 | 96373757 | 1911 | 1435 | 38  | 46.06 | 4.93 | 49.3  |
| chr14 | 96556336 | 96557884 | 1549 | 795  | 44  | 33.91 | 4.79 | 48.68 |
| chr14 | 96654833 | 96655910 | 1078 | 428  | 23  | 31.34 | 4.33 | 50.21 |
| chr14 | 96758823 | 96761884 | 3062 | 601  | 75  | 47.69 | 4.74 | 49.3  |
| chr14 | 96781636 | 96784702 | 3067 | 2055 | 68  | 34.94 | 3.66 | 47.68 |

|       |           |           |      |      |    |       |      |       |
|-------|-----------|-----------|------|------|----|-------|------|-------|
| chr14 | 97122631  | 97125009  | 2379 | 1988 | 57 | 55.72 | 5.29 | 53.67 |
| chr14 | 97336513  | 97339888  | 3376 | 453  | 79 | 36.82 | 4.22 | 46.83 |
| chr14 | 97417925  | 97418791  | 867  | 641  | 20 | 32.02 | 4.09 | 49.79 |
| chr14 | 97433656  | 97435675  | 2020 | 925  | 51 | 31.04 | 3.42 | 50.54 |
| chr14 | 97538111  | 97538993  | 883  | 454  | 22 | 30.23 | 4.41 | 51.71 |
| chr14 | 97638500  | 97639589  | 1090 | 437  | 28 | 35.76 | 5.66 | 47.08 |
| chr14 | 97827730  | 97828608  | 879  | 282  | 19 | 32.14 | 6.16 | 49.88 |
| chr14 | 98065808  | 98067372  | 1565 | 1274 | 45 | 59.14 | 4.28 | 53.33 |
| chr14 | 98147006  | 98148157  | 1152 | 482  | 23 | 30.08 | 5.34 | 51.53 |
| chr14 | 98228864  | 98230596  | 1733 | 1177 | 37 | 47.17 | 5.51 | 47.66 |
| chr14 | 98328059  | 98328892  | 834  | 546  | 18 | 30.49 | 4.11 | 51.26 |
| chr14 | 98395765  | 98396708  | 944  | 583  | 20 | 32.69 | 4.11 | 49.42 |
| chr14 | 98886564  | 98887937  | 1374 | 594  | 26 | 30.95 | 5.34 | 50.53 |
| chr14 | 99110620  | 99111261  | 642  | 360  | 18 | 39.47 | 6.47 | 47.06 |
| chr14 | 99903324  | 99906033  | 2710 | 402  | 62 | 44.51 | 4    | 48.73 |
| chr14 | 100066899 | 100067900 | 1002 | 281  | 22 | 32.61 | 5.64 | 49.44 |
| chr14 | 100525167 | 100526435 | 1269 | 560  | 32 | 46.87 | 6.23 | 47.44 |
| chr14 | 100781134 | 100782921 | 1788 | 467  | 40 | 30.95 | 4.13 | 50.52 |
| chr14 | 100783577 | 100785404 | 1828 | 980  | 45 | 54.8  | 4.45 | 54.29 |
| chr14 | 101037864 | 101038676 | 813  | 462  | 18 | 31.68 | 5.75 | 49.84 |
| chr14 | 101194996 | 101195940 | 945  | 483  | 21 | 36.81 | 4.52 | 46.82 |
| chr14 | 101289860 | 101290621 | 762  | 289  | 21 | 49.32 | 5.34 | 51.08 |
| chr14 | 101465081 | 101466464 | 1384 | 608  | 32 | 40.25 | 5.88 | 46.71 |
| chr14 | 101803168 | 101804306 | 1139 | 483  | 24 | 34.45 | 6.57 | 47.75 |
| chr14 | 101890866 | 101892170 | 1305 | 810  | 29 | 31.95 | 5.71 | 49.76 |
| chr14 | 102127759 | 102129097 | 1339 | 542  | 37 | 49.97 | 6.28 | 51.64 |
| chr14 | 102179985 | 102180896 | 912  | 253  | 19 | 30.36 | 4.52 | 51.57 |
| chr14 | 102504134 | 102505259 | 1126 | 495  | 23 | 31.29 | 5.34 | 50.34 |
| chr14 | 103362335 | 103364077 | 1743 | 1167 | 50 | 36.16 | 3.91 | 46.96 |
| chr14 | 103924403 | 103926270 | 1868 | 1185 | 49 | 31.74 | 4.34 | 49.77 |
| chr14 | 103974502 | 103976263 | 1762 | 1311 | 37 | 41.15 | 5.21 | 46.39 |
| chr14 | 104226827 | 104228034 | 1208 | 655  | 32 | 31.72 | 4.55 | 49.73 |
| chr14 | 104311841 | 104313471 | 1631 | 623  | 30 | 33.97 | 4.28 | 48.61 |
| chr14 | 105110719 | 105111675 | 957  | 672  | 27 | 35.89 | 5.56 | 46.95 |
| chr14 | 105319859 | 105320736 | 878  | 289  | 20 | 36.46 | 6.16 | 47.12 |
| chr14 | 106129557 | 106130835 | 1279 | 637  | 32 | 38.31 | 4.98 | 46.41 |
| chr14 | 106887430 | 106888316 | 887  | 422  | 21 | 34.31 | 4.79 | 47.84 |
| chr15 | 20036982  | 20039405  | 2424 | 661  | 70 | 68.43 | 4.28 | 55.73 |
| chr15 | 20054174  | 20055384  | 1211 | 409  | 30 | 49.71 | 5.71 | 51.66 |
| chr15 | 20072912  | 20074209  | 1298 | 523  | 25 | 30.73 | 5.75 | 51.04 |
| chr15 | 20340946  | 20342497  | 1552 | 1007 | 32 | 33.78 | 3.9  | 48.7  |
| chr15 | 20482700  | 20484150  | 1451 | 632  | 35 | 56.63 | 6.04 | 53.49 |
| chr15 | 20595857  | 20597490  | 1634 | 1232 | 39 | 38.55 | 3.39 | 46.24 |
| chr15 | 20600876  | 20603552  | 2677 | 614  | 60 | 31.68 | 3.4  | 49.83 |
| chr15 | 20936163  | 20937621  | 1459 | 802  | 31 | 45.42 | 7.39 | 49.64 |
| chr15 | 21102141  | 21103498  | 1358 | 415  | 34 | 59.74 | 4.52 | 56.4  |
| chr15 | 21200468  | 21201634  | 1167 | 616  | 26 | 40.96 | 6.57 | 46.35 |
| chr15 | 21314799  | 21315762  | 964  | 283  | 22 | 35.72 | 5.34 | 47.25 |
| chr15 | 21338473  | 21339486  | 1014 | 281  | 22 | 33    | 5.75 | 49.18 |
| chr15 | 22370859  | 22371767  | 909  | 302  | 20 | 34.64 | 6.16 | 47.61 |
| chr15 | 24355884  | 24356899  | 1016 | 547  | 23 | 36.96 | 5.34 | 46.98 |
| chr15 | 25608255  | 25609708  | 1454 | 1115 | 31 | 30.75 | 3.66 | 50.94 |

|       |          |          |      |      |    |       |      |       |
|-------|----------|----------|------|------|----|-------|------|-------|
| chr15 | 25666042 | 25668110 | 2069 | 1373 | 48 | 52.55 | 5.48 | 50.24 |
| chr15 | 27363998 | 27364891 | 894  | 450  | 20 | 35.51 | 4.93 | 47.23 |
| chr15 | 27554553 | 27555355 | 803  | 511  | 19 | 36.67 | 5.34 | 47.02 |
| chr15 | 28483872 | 28484564 | 693  | 360  | 16 | 30.12 | 4.93 | 51.63 |
| chr15 | 28702727 | 28703984 | 1258 | 575  | 30 | 39.17 | 4.79 | 46.26 |
| chr15 | 28719607 | 28720803 | 1197 | 339  | 28 | 35.28 | 4.45 | 47.38 |
| chr15 | 28940435 | 28941712 | 1278 | 612  | 25 | 31.61 | 5.34 | 49.96 |
| chr15 | 29552188 | 29553171 | 984  | 419  | 23 | 38.8  | 6.16 | 46.08 |
| chr15 | 30935419 | 30937279 | 1861 | 1069 | 42 | 37.64 | 4.36 | 45.92 |
| chr15 | 32044693 | 32045749 | 1057 | 701  | 21 | 30.84 | 4.93 | 50.83 |
| chr15 | 32061982 | 32063014 | 1033 | 549  | 22 | 32.03 | 6.57 | 49.77 |
| chr15 | 32242747 | 32244144 | 1398 | 605  | 39 | 80.75 | 9.86 | 52.94 |
| chr15 | 32949554 | 32950406 | 853  | 574  | 22 | 42.6  | 5.34 | 47.33 |
| chr15 | 33095120 | 33096036 | 917  | 398  | 20 | 34.18 | 5.34 | 47.96 |
| chr15 | 33211554 | 33213049 | 1496 | 1241 | 34 | 51.47 | 4.93 | 51.78 |
| chr15 | 34203230 | 34204098 | 869  | 322  | 19 | 32.71 | 4.52 | 49.41 |
| chr15 | 34404414 | 34405309 | 896  | 616  | 20 | 35.39 | 6.57 | 47.63 |
| chr15 | 35156755 | 35158024 | 1270 | 544  | 28 | 38.29 | 5.33 | 46.36 |
| chr15 | 35169150 | 35170441 | 1292 | 775  | 31 | 54.99 | 7.8  | 53.73 |
| chr15 | 35803384 | 35804432 | 1049 | 769  | 24 | 39.28 | 7.39 | 46.43 |
| chr15 | 36096923 | 36097852 | 930  | 687  | 20 | 33.46 | 4.52 | 48.63 |
| chr15 | 36305216 | 36305786 | 571  | 285  | 15 | 32.66 | 6.16 | 49.32 |
| chr15 | 36471685 | 36472595 | 911  | 677  | 19 | 30.42 | 4.52 | 51.31 |
| chr15 | 36475629 | 36476541 | 913  | 252  | 24 | 47.93 | 5.34 | 49.28 |
| chr15 | 36611801 | 36612790 | 990  | 265  | 21 | 33.25 | 4.83 | 48.92 |
| chr15 | 36750017 | 36750841 | 825  | 542  | 19 | 35.3  | 5.34 | 47.33 |
| chr15 | 37349029 | 37350100 | 1072 | 643  | 27 | 38.68 | 4.45 | 46.17 |
| chr15 | 37914100 | 37915259 | 1160 | 534  | 26 | 36.51 | 4.95 | 47.01 |
| chr15 | 37928448 | 37929257 | 810  | 521  | 19 | 32.4  | 4.57 | 49.67 |
| chr15 | 38195693 | 38196666 | 974  | 568  | 24 | 43.82 | 6.98 | 47.93 |
| chr15 | 38256077 | 38257141 | 1065 | 684  | 22 | 30.45 | 4.93 | 51.29 |
| chr15 | 38427479 | 38428223 | 745  | 267  | 20 | 30.66 | 4.67 | 51.03 |
| chr15 | 38563485 | 38564555 | 1071 | 625  | 25 | 42.25 | 5.34 | 47.1  |
| chr15 | 38810735 | 38811754 | 1020 | 577  | 21 | 32.69 | 4.11 | 49.36 |
| chr15 | 38855901 | 38858421 | 2521 | 1814 | 67 | 65.85 | 3.81 | 54.12 |
| chr15 | 38971899 | 38972852 | 954  | 523  | 27 | 39.47 | 4.94 | 47.09 |
| chr15 | 39125027 | 39126093 | 1067 | 476  | 25 | 42.49 | 4.93 | 47.34 |
| chr15 | 39544311 | 39546178 | 1868 | 1282 | 37 | 44.43 | 4.52 | 48.42 |
| chr15 | 40564995 | 40566188 | 1194 | 447  | 25 | 35.56 | 4.93 | 47.16 |
| chr15 | 40778292 | 40779126 | 835  | 567  | 18 | 30.44 | 3.7  | 51.32 |
| chr15 | 40923838 | 40924592 | 755  | 479  | 17 | 30.77 | 4.93 | 50.95 |
| chr15 | 41045496 | 41046917 | 1422 | 908  | 31 | 32.21 | 3.99 | 49.96 |
| chr15 | 41172755 | 41173617 | 863  | 361  | 20 | 37.38 | 4.52 | 46.58 |
| chr15 | 41231153 | 41232036 | 884  | 434  | 20 | 32.15 | 4.57 | 49.94 |
| chr15 | 41281333 | 41282129 | 797  | 511  | 18 | 31.7  | 5.24 | 49.75 |
| chr15 | 42451881 | 42453600 | 1720 | 1043 | 34 | 40.39 | 4.52 | 46.79 |
| chr15 | 42704186 | 42705903 | 1718 | 997  | 41 | 64.9  | 4.78 | 53.8  |
| chr15 | 42771477 | 42772823 | 1347 | 557  | 30 | 35.17 | 4.84 | 47.09 |
| chr15 | 42993121 | 42994582 | 1462 | 568  | 31 | 45.26 | 5.75 | 49.21 |
| chr15 | 43135811 | 43137484 | 1674 | 1138 | 41 | 52.48 | 5.48 | 50.55 |
| chr15 | 43346505 | 43347768 | 1264 | 515  | 28 | 38.6  | 4.95 | 46.12 |
| chr15 | 43367714 | 43368617 | 904  | 706  | 19 | 30.79 | 4.52 | 50.91 |

|       |          |          |      |      |     |        |      |       |
|-------|----------|----------|------|------|-----|--------|------|-------|
| chr15 | 43415016 | 43416276 | 1261 | 539  | 29  | 35.43  | 5.14 | 47.47 |
| chr15 | 43463257 | 43464201 | 945  | 329  | 21  | 36.81  | 4.52 | 46.82 |
| chr15 | 43773140 | 43775651 | 2512 | 1993 | 55  | 73     | 5.34 | 57.3  |
| chr15 | 43912959 | 43913486 | 528  | 264  | 16  | 41.71  | 5.79 | 47.24 |
| chr15 | 43928099 | 43928812 | 714  | 275  | 19  | 42.87  | 4.52 | 47.27 |
| chr15 | 44342574 | 44343170 | 597  | 322  | 16  | 35.79  | 5.64 | 47.12 |
| chr15 | 44579335 | 44581458 | 2124 | 1334 | 109 | 172.56 | 13.3 | 13.33 |
| chr15 | 44666762 | 44667788 | 1027 | 617  | 25  | 44.94  | 4.93 | 48.76 |
| chr15 | 45009387 | 45011231 | 1845 | 531  | 51  | 65.45  | 4.98 | 54.02 |
| chr15 | 45011243 | 45013895 | 2653 | 640  | 64  | 69.92  | 5.65 | 52.89 |
| chr15 | 45343719 | 45345105 | 1387 | 706  | 30  | 31.3   | 4.36 | 50.33 |
| chr15 | 45598273 | 45599481 | 1209 | 592  | 26  | 33.33  | 6.02 | 48.71 |
| chr15 | 46794616 | 46795309 | 694  | 324  | 16  | 30.06  | 4.11 | 51.46 |
| chr15 | 47398240 | 47399560 | 1321 | 745  | 27  | 36.94  | 4.93 | 46.89 |
| chr15 | 47648313 | 47649499 | 1187 | 730  | 31  | 62.05  | 5.34 | 53.97 |
| chr15 | 48644924 | 48645654 | 731  | 445  | 17  | 30.32  | 5.12 | 51.57 |
| chr15 | 48681734 | 48682523 | 790  | 260  | 20  | 42.22  | 5.75 | 46.94 |
| chr15 | 49054065 | 49054946 | 882  | 434  | 19  | 31.98  | 5.34 | 49.78 |
| chr15 | 49399920 | 49402436 | 2517 | 918  | 58  | 36.94  | 4.73 | 46.87 |
| chr15 | 49833324 | 49834095 | 772  | 291  | 20  | 38.08  | 5.21 | 46.42 |
| chr15 | 49966649 | 49967875 | 1227 | 725  | 26  | 31.81  | 4.47 | 49.85 |
| chr15 | 50112083 | 50113090 | 1008 | 517  | 25  | 43.4   | 5.12 | 47.86 |
| chr15 | 50388938 | 50389846 | 909  | 285  | 20  | 34.64  | 6.98 | 47.61 |
| chr15 | 50411332 | 50412248 | 917  | 632  | 21  | 36.76  | 6.37 | 46.97 |
| chr15 | 50895696 | 50896595 | 900  | 283  | 20  | 31.24  | 5.71 | 50.47 |
| chr15 | 51021192 | 51022459 | 1268 | 505  | 33  | 61.13  | 7.39 | 54.37 |
| chr15 | 51027877 | 51028546 | 670  | 333  | 21  | 46.11  | 5.48 | 49.3  |
| chr15 | 51294087 | 51295832 | 1746 | 685  | 38  | 44.44  | 5.16 | 48.55 |
| chr15 | 51675380 | 51676210 | 831  | 543  | 19  | 34.93  | 4.52 | 47.61 |
| chr15 | 51820705 | 51821558 | 854  | 259  | 19  | 33.57  | 4.93 | 48.6  |
| chr15 | 51987394 | 51988181 | 788  | 277  | 20  | 38.16  | 5.33 | 46.23 |
| chr15 | 52251547 | 52252456 | 910  | 635  | 23  | 43.43  | 5.34 | 47.99 |
| chr15 | 52311056 | 52311668 | 613  | 338  | 17  | 34.8   | 5.46 | 47.58 |
| chr15 | 52715736 | 52717306 | 1571 | 1052 | 33  | 43.64  | 5.75 | 47.8  |
| chr15 | 52859488 | 52861539 | 2052 | 1801 | 49  | 44.96  | 3.97 | 48.79 |
| chr15 | 52873720 | 52875633 | 1914 | 1275 | 38  | 34.28  | 3.77 | 47.82 |
| chr15 | 53094695 | 53095661 | 967  | 576  | 21  | 35.55  | 6.16 | 47.19 |
| chr15 | 54629501 | 54630322 | 822  | 537  | 18  | 31.16  | 5.34 | 50.58 |
| chr15 | 54971196 | 54972100 | 905  | 640  | 19  | 30.73  | 6.16 | 50.98 |
| chr15 | 55134010 | 55135402 | 1393 | 765  | 27  | 33.62  | 4.93 | 48.72 |
| chr15 | 55153044 | 55153957 | 914  | 281  | 23  | 43.16  | 4.93 | 47.44 |
| chr15 | 55174708 | 55176299 | 1592 | 1327 | 32  | 42.63  | 4.93 | 47.34 |
| chr15 | 55476082 | 55477540 | 1459 | 1204 | 31  | 39.76  | 4.19 | 46.69 |
| chr15 | 55811204 | 55812169 | 966  | 450  | 20  | 31.53  | 5.75 | 49.91 |
| chr15 | 55818467 | 55819321 | 855  | 628  | 20  | 37.88  | 6.57 | 46.61 |
| chr15 | 55995912 | 55996935 | 1024 | 660  | 24  | 40.73  | 5.75 | 46.59 |
| chr15 | 56101793 | 56102431 | 639  | 372  | 17  | 38.51  | 6.57 | 46.33 |
| chr15 | 56335232 | 56336574 | 1343 | 561  | 31  | 34.11  | 5.82 | 48.1  |
| chr15 | 56547168 | 56548446 | 1279 | 543  | 29  | 47.12  | 5.75 | 47.46 |
| chr15 | 56869550 | 56870913 | 1364 | 695  | 31  | 38.48  | 5.59 | 46.39 |
| chr15 | 56879105 | 56880390 | 1286 | 450  | 32  | 53.47  | 5.33 | 51.91 |
| chr15 | 57172129 | 57173180 | 1052 | 350  | 30  | 41.94  | 4.47 | 47.04 |



|       |          |          |      |      |    |       |      |       |
|-------|----------|----------|------|------|----|-------|------|-------|
| chr15 | 57254425 | 57255393 | 969  | 713  | 23 | 31.22 | 4.59 | 50.53 |
| chr15 | 57262628 | 57263680 | 1053 | 537  | 22 | 31.03 | 4.93 | 50.5  |
| chr15 | 57680620 | 57681376 | 757  | 473  | 20 | 44.63 | 5.34 | 48.91 |
| chr15 | 57754506 | 57755531 | 1026 | 575  | 23 | 36.4  | 6.16 | 47.16 |
| chr15 | 57866370 | 57867266 | 897  | 284  | 20 | 35.33 | 6.16 | 47.42 |
| chr15 | 58273256 | 58274021 | 766  | 487  | 17 | 30.13 | 5.75 | 51.65 |
| chr15 | 58607311 | 58608454 | 1144 | 710  | 23 | 30.45 | 5.34 | 51.27 |
| chr15 | 59528213 | 59529516 | 1304 | 454  | 30 | 30.42 | 4.67 | 51.33 |
| chr15 | 60414168 | 60414841 | 674  | 409  | 17 | 32.43 | 4.57 | 49.56 |
| chr15 | 60463613 | 60464423 | 811  | 374  | 19 | 36.17 | 4.52 | 46.97 |
| chr15 | 60740959 | 60741885 | 927  | 653  | 21 | 34.3  | 5    | 47.82 |
| chr15 | 62279848 | 62280523 | 676  | 389  | 19 | 43.53 | 4.72 | 48.03 |
| chr15 | 62350792 | 62352739 | 1948 | 1521 | 50 | 31.79 | 3.67 | 49.79 |
| chr15 | 63426063 | 63427231 | 1169 | 852  | 26 | 36.03 | 4.57 | 46.95 |
| chr15 | 63470270 | 63470782 | 513  | 256  | 17 | 54.21 | 6.98 | 53.5  |
| chr15 | 63693998 | 63695109 | 1112 | 777  | 26 | 44.12 | 4.93 | 47.92 |
| chr15 | 63749134 | 63749963 | 830  | 540  | 20 | 35.4  | 5.71 | 47.55 |
| chr15 | 64077822 | 64078763 | 942  | 499  | 21 | 36.98 | 4.93 | 46.95 |
| chr15 | 64093074 | 64094474 | 1401 | 790  | 34 | 48.77 | 5.21 | 50.64 |
| chr15 | 64221800 | 64222735 | 936  | 521  | 21 | 36.92 | 4.48 | 46.8  |
| chr15 | 64278714 | 64280112 | 1399 | 787  | 36 | 54.23 | 5.77 | 54.21 |
| chr15 | 64549347 | 64551062 | 1716 | 1082 | 37 | 40.7  | 5.77 | 46.52 |
| chr15 | 64557274 | 64558595 | 1322 | 1072 | 32 | 46.89 | 4.33 | 47.64 |
| chr15 | 64612938 | 64613911 | 974  | 272  | 26 | 44.95 | 4.37 | 48.72 |
| chr15 | 65425113 | 65426250 | 1138 | 549  | 27 | 33.06 | 4.65 | 49.15 |
| chr15 | 65482190 | 65483213 | 1024 | 755  | 23 | 34.13 | 4.72 | 48.12 |
| chr15 | 65485268 | 65486090 | 823  | 428  | 18 | 31.11 | 4.11 | 50.68 |
| chr15 | 65945386 | 65947031 | 1646 | 1077 | 31 | 36.63 | 6.16 | 46.96 |
| chr15 | 66273813 | 66274590 | 778  | 504  | 20 | 33.29 | 4.79 | 48.87 |
| chr15 | 66771624 | 66773179 | 1556 | 934  | 37 | 44.51 | 4.11 | 48.7  |
| chr15 | 67043907 | 67044957 | 1051 | 464  | 21 | 31.13 | 4.93 | 50.63 |
| chr15 | 67171157 | 67172110 | 954  | 669  | 21 | 36.29 | 4.93 | 46.94 |
| chr15 | 67308672 | 67309434 | 763  | 222  | 17 | 30.3  | 4.11 | 51.54 |
| chr15 | 68015505 | 68016880 | 1376 | 851  | 28 | 38.04 | 5.34 | 46.36 |
| chr15 | 68688146 | 68689205 | 1060 | 785  | 24 | 38.65 | 4.93 | 46.11 |
| chr15 | 69517339 | 69518231 | 893  | 374  | 23 | 44.57 | 5.75 | 48.88 |
| chr15 | 69706710 | 69708285 | 1576 | 764  | 37 | 40.26 | 4.61 | 46.82 |
| chr15 | 69732772 | 69733576 | 805  | 282  | 20 | 35.85 | 4.84 | 47.01 |
| chr15 | 69902515 | 69903510 | 996  | 644  | 21 | 33.95 | 4.52 | 48.63 |
| chr15 | 69912279 | 69913040 | 762  | 209  | 17 | 30.36 | 4.11 | 51.65 |
| chr15 | 70189850 | 70190565 | 716  | 275  | 17 | 31.24 | 6.3  | 50.48 |
| chr15 | 70676195 | 70676884 | 690  | 415  | 16 | 30.3  | 5.34 | 51.62 |
| chr15 | 70968873 | 70970595 | 1723 | 1102 | 38 | 51.43 | 5.9  | 51.7  |
| chr15 | 71001633 | 71002681 | 1049 | 486  | 22 | 31.23 | 5.75 | 50.5  |
| chr15 | 71348765 | 71350274 | 1510 | 761  | 33 | 40.86 | 4.95 | 46.37 |
| chr15 | 71739764 | 71740754 | 991  | 715  | 23 | 38.39 | 4.93 | 46.31 |
| chr15 | 71829686 | 71830486 | 801  | 476  | 18 | 32.38 | 4.52 | 49.75 |
| chr15 | 72315017 | 72316005 | 989  | 284  | 25 | 32    | 4.8  | 49.79 |
| chr15 | 72846257 | 72847276 | 1020 | 263  | 22 | 30.48 | 5.12 | 51.28 |
| chr15 | 72853860 | 72855183 | 1324 | 600  | 36 | 63.14 | 7.53 | 53.95 |
| chr15 | 73419156 | 73420897 | 1742 | 421  | 37 | 43.88 | 4.19 | 47.85 |
| chr15 | 74907130 | 74908756 | 1627 | 684  | 47 | 72.13 | 4.65 | 57.45 |

|       |          |          |      |      |     |       |       |       |
|-------|----------|----------|------|------|-----|-------|-------|-------|
| chr15 | 75879599 | 75881038 | 1440 | 391  | 33  | 36.64 | 4.11  | 47.03 |
| chr15 | 75886639 | 75887967 | 1329 | 880  | 30  | 36.08 | 4.15  | 46.94 |
| chr15 | 76304347 | 76305855 | 1509 | 286  | 34  | 33.81 | 4.61  | 48.87 |
| chr15 | 76546814 | 76547934 | 1121 | 470  | 27  | 47.42 | 4.89  | 48.47 |
| chr15 | 76756171 | 76757276 | 1106 | 552  | 23  | 32.25 | 4.93  | 50.03 |
| chr15 | 76777413 | 76778162 | 750  | 286  | 19  | 40.24 | 4.93  | 46.68 |
| chr15 | 76806055 | 76806973 | 919  | 542  | 25  | 47.22 | 6.47  | 47.86 |
| chr15 | 76968785 | 76970235 | 1451 | 578  | 30  | 41.95 | 4.93  | 47.06 |
| chr15 | 77160010 | 77160864 | 855  | 250  | 21  | 41.35 | 4.83  | 46.92 |
| chr15 | 77489342 | 77490704 | 1363 | 762  | 31  | 44.78 | 4.57  | 48.99 |
| chr15 | 77767420 | 77768184 | 765  | 486  | 20  | 44.03 | 5.34  | 48.12 |
| chr15 | 78439252 | 78440535 | 1284 | 612  | 32  | 49.21 | 5.77  | 50.78 |
| chr15 | 78460966 | 78461918 | 953  | 694  | 22  | 36.34 | 5.34  | 47.04 |
| chr15 | 78795914 | 78796665 | 752  | 282  | 17  | 30.95 | 4.93  | 50.53 |
| chr15 | 79204953 | 79205807 | 855  | 310  | 19  | 31.98 | 5.18  | 49.84 |
| chr15 | 79298126 | 79299213 | 1088 | 804  | 26  | 45.57 | 5.75  | 50.15 |
| chr15 | 80188991 | 80190394 | 1404 | 288  | 41  | 44.49 | 5.27  | 48.54 |
| chr15 | 80228232 | 80229251 | 1020 | 426  | 21  | 32.69 | 6.57  | 49.36 |
| chr15 | 80383805 | 80384627 | 823  | 438  | 25  | 31.37 | 4.74  | 50.23 |
| chr15 | 80672154 | 80672967 | 814  | 530  | 20  | 40.56 | 6.16  | 46.89 |
| chr15 | 80698521 | 80699217 | 697  | 382  | 17  | 34.4  | 5.75  | 47.76 |
| chr15 | 81863499 | 81864388 | 890  | 616  | 21  | 40.16 | 6.16  | 46.66 |
| chr15 | 81967212 | 81968839 | 1628 | 1029 | 39  | 64.94 | 4.93  | 54.1  |
| chr15 | 82546445 | 82548604 | 2160 | 1699 | 53  | 54.13 | 4.05  | 53.08 |
| chr15 | 82549294 | 82550359 | 1066 | 411  | 24  | 33.87 | 5.33  | 48.64 |
| chr15 | 83164220 | 83165679 | 1460 | 638  | 37  | 64.85 | 7.25  | 54.05 |
| chr15 | 83173974 | 83174930 | 957  | 612  | 20  | 32    | 4.11  | 49.74 |
| chr15 | 83352314 | 83353295 | 982  | 286  | 22  | 34.71 | 6.16  | 47.7  |
| chr15 | 83874145 | 83875040 | 896  | 534  | 20  | 35.39 | 6.16  | 47.63 |
| chr15 | 83916918 | 83917736 | 819  | 571  | 20  | 36.1  | 4.19  | 47.01 |
| chr15 | 84132788 | 84133926 | 1139 | 558  | 23  | 30.68 | 4.93  | 51    |
| chr15 | 85111741 | 85112575 | 835  | 571  | 20  | 35.08 | 4.19  | 47.38 |
| chr15 | 85223302 | 85224507 | 1206 | 669  | 24  | 30.2  | 5.24  | 51.75 |
| chr15 | 85460364 | 85461262 | 899  | 508  | 21  | 39.59 | 6.57  | 46.6  |
| chr15 | 85559853 | 85560658 | 806  | 278  | 18  | 32.08 | 5.34  | 49.79 |
| chr15 | 85606856 | 85607767 | 912  | 486  | 20  | 34.47 | 5.34  | 47.74 |
| chr15 | 85709305 | 85710217 | 913  | 522  | 19  | 30.31 | 4.11  | 51.54 |
| chr15 | 86037191 | 86038452 | 1262 | 562  | 33  | 33.13 | 5.42  | 49.13 |
| chr15 | 86357898 | 86358815 | 918  | 291  | 20  | 34.13 | 4.93  | 48.07 |
| chr15 | 86439311 | 86440720 | 1410 | 965  | 112 | 578.7 | 36.97 | 16.67 |
| chr15 | 87247926 | 87249020 | 1095 | 718  | 23  | 32.79 | 5.34  | 49.41 |
| chr15 | 88482375 | 88484052 | 1678 | 1054 | 36  | 49.78 | 4.52  | 52.1  |
| chr15 | 88529595 | 88530537 | 943  | 287  | 20  | 32.75 | 4.11  | 49.37 |
| chr15 | 88579193 | 88580499 | 1307 | 695  | 28  | 41.5  | 6.57  | 47.14 |
| chr15 | 89181528 | 89183856 | 2329 | 1700 | 47  | 35.25 | 5.65  | 47.29 |
| chr15 | 89867896 | 89869036 | 1141 | 416  | 30  | 46.24 | 8.56  | 48.77 |
| chr15 | 91509366 | 91510286 | 921  | 251  | 20  | 33.96 | 5.75  | 48.64 |
| chr15 | 91814854 | 91815986 | 1133 | 658  | 26  | 31.59 | 4.79  | 50.03 |
| chr15 | 92255563 | 92256345 | 783  | 270  | 18  | 33.46 | 5.75  | 48.67 |
| chr15 | 92286334 | 92287094 | 761  | 500  | 17  | 30.42 | 4.52  | 51.28 |
| chr15 | 93203708 | 93204741 | 1034 | 771  | 21  | 31.59 | 4.48  | 50    |
| chr15 | 93339628 | 93341218 | 1591 | 1289 | 42  | 75.07 | 7.39  | 58.44 |

|       |           |           |      |      |    |       |      |       |
|-------|-----------|-----------|------|------|----|-------|------|-------|
| chr15 | 93469637  | 93470491  | 855  | 287  | 23 | 32.18 | 4.12 | 49.95 |
| chr15 | 93492541  | 93493796  | 1256 | 614  | 30 | 46.94 | 6.09 | 47.66 |
| chr15 | 95022178  | 95022956  | 779  | 496  | 19 | 38.24 | 5.75 | 46.29 |
| chr15 | 95361141  | 95361948  | 808  | 354  | 19 | 36.36 | 5.34 | 47.14 |
| chr15 | 95785791  | 95786656  | 866  | 550  | 19 | 32.88 | 4.52 | 49.29 |
| chr15 | 96142384  | 96143235  | 852  | 274  | 23 | 47.47 | 4.93 | 48.55 |
| chr15 | 96396819  | 96397793  | 975  | 343  | 21 | 31.06 | 5.71 | 50.75 |
| chr15 | 96418384  | 96419222  | 839  | 252  | 25 | 58.73 | 5.75 | 52.85 |
| chr15 | 97142061  | 97142823  | 763  | 514  | 18 | 34.7  | 4.11 | 47.79 |
| chr15 | 97543322  | 97544607  | 1286 | 559  | 25 | 31.25 | 6.16 | 50.49 |
| chr15 | 97675675  | 97676475  | 801  | 277  | 19 | 36.8  | 4.93 | 46.76 |
| chr15 | 97788443  | 97789196  | 754  | 292  | 21 | 45.36 | 5.71 | 49.46 |
| chr15 | 98553755  | 98554549  | 795  | 516  | 18 | 32.73 | 6.57 | 49.31 |
| chr15 | 98853354  | 98854358  | 1005 | 378  | 24 | 41.88 | 6.57 | 47    |
| chr15 | 99111641  | 99112603  | 963  | 269  | 22 | 35.77 | 4.93 | 47.11 |
| chr15 | 99869707  | 99870687  | 981  | 663  | 24 | 43.37 | 5.34 | 47.86 |
| chr15 | 100114114 | 100115289 | 1176 | 652  | 29 | 45.27 | 4.79 | 49.14 |
| chr15 | 100822152 | 100823515 | 1364 | 273  | 32 | 54.93 | 4.93 | 53.72 |
| chr15 | 101025327 | 101026066 | 740  | 467  | 17 | 31.67 | 4.93 | 49.82 |
| chr15 | 101477209 | 101477891 | 683  | 260  | 17 | 35    | 5.3  | 47.62 |
| chr15 | 102228068 | 102229374 | 1307 | 1019 | 31 | 54.05 | 5.34 | 52.68 |
| chr15 | 102393243 | 102394032 | 790  | 415  | 18 | 33.03 | 4.52 | 49.16 |
| chr15 | 102401649 | 102402487 | 839  | 240  | 20 | 38.9  | 5.75 | 46.29 |
| chr15 | 102458243 | 102460431 | 2189 | 1519 | 52 | 33.58 | 3.98 | 48.71 |
| chr16 | 219420    | 220697    | 1278 | 703  | 26 | 35.25 | 6.16 | 47.32 |
| chr16 | 305659    | 306460    | 802  | 529  | 18 | 32.32 | 6.16 | 50.01 |
| chr16 | 395885    | 397367    | 1483 | 520  | 32 | 34.57 | 3.42 | 47.72 |
| chr16 | 411368    | 412262    | 895  | 635  | 20 | 35.45 | 5.34 | 47.41 |
| chr16 | 1833134   | 1833800   | 667  | 388  | 17 | 32.91 | 4.57 | 49.31 |
| chr16 | 2103921   | 2104993   | 1073 | 506  | 22 | 30.07 | 4.93 | 51.46 |
| chr16 | 2480350   | 2481517   | 1168 | 471  | 30 | 50.8  | 5.21 | 52.01 |
| chr16 | 2676628   | 2678065   | 1438 | 879  | 30 | 42.59 | 4.93 | 47.35 |
| chr16 | 2961131   | 2962454   | 1324 | 847  | 35 | 36.1  | 4.85 | 46.96 |
| chr16 | 3129583   | 3130448   | 866  | 254  | 21 | 41.73 | 5.34 | 47.26 |
| chr16 | 3241245   | 3241859   | 615  | 279  | 15 | 30.53 | 5.75 | 51.26 |
| chr16 | 3359657   | 3360489   | 833  | 426  | 18 | 30.55 | 5.34 | 51.23 |
| chr16 | 4015629   | 4016727   | 1099 | 790  | 27 | 37.08 | 5.48 | 46.94 |
| chr16 | 4200944   | 4201892   | 949  | 461  | 22 | 36.57 | 5.75 | 46.89 |
| chr16 | 5601408   | 5602247   | 840  | 277  | 20 | 38.84 | 5.34 | 46.24 |
| chr16 | 6923983   | 6924673   | 691  | 278  | 17 | 34.8  | 4.93 | 47.53 |
| chr16 | 7143629   | 7144453   | 825  | 561  | 18 | 30.99 | 3.7  | 50.47 |
| chr16 | 8472499   | 8473513   | 1015 | 610  | 23 | 32.76 | 6.09 | 49.4  |
| chr16 | 10896046  | 10896925  | 880  | 264  | 20 | 31.27 | 4.09 | 50.48 |
| chr16 | 11387408  | 11388260  | 853  | 398  | 20 | 31.75 | 5.1  | 49.81 |
| chr16 | 11776350  | 11777546  | 1197 | 662  | 29 | 41.02 | 5.65 | 46.29 |
| chr16 | 12327519  | 12328162  | 644  | 259  | 17 | 37.78 | 5.3  | 46.67 |
| chr16 | 12688042  | 12689072  | 1031 | 673  | 21 | 32.13 | 4.93 | 49.78 |
| chr16 | 12880660  | 12881570  | 911  | 513  | 19 | 30.42 | 5.75 | 51.31 |
| chr16 | 13629812  | 13630886  | 1075 | 764  | 23 | 33.8  | 4.93 | 48.84 |
| chr16 | 13740162  | 13740835  | 674  | 350  | 16 | 31.3  | 5.34 | 50.33 |
| chr16 | 14257985  | 14258880  | 896  | 610  | 19 | 31.21 | 4.93 | 50.51 |
| chr16 | 15867344  | 15868199  | 856  | 448  | 20 | 33.79 | 4.57 | 48.75 |

|       |          |          |      |      |    |       |      |       |
|-------|----------|----------|------|------|----|-------|------|-------|
| chr16 | 15973389 | 15974219 | 831  | 562  | 19 | 31.16 | 3.81 | 50.6  |
| chr16 | 16121182 | 16122060 | 879  | 286  | 19 | 32.14 | 4.52 | 49.88 |
| chr16 | 16154752 | 16155578 | 827  | 469  | 18 | 30.88 | 5.75 | 50.73 |
| chr16 | 16324500 | 16325202 | 703  | 279  | 18 | 38.74 | 5.75 | 46.01 |
| chr16 | 18307323 | 18308498 | 1176 | 590  | 30 | 58.06 | 5.75 | 53.31 |
| chr16 | 18807324 | 18808122 | 799  | 563  | 25 | 31.76 | 3.35 | 49.85 |
| chr16 | 20763885 | 20764750 | 866  | 581  | 23 | 41.81 | 5.71 | 46.95 |
| chr16 | 20911513 | 20913773 | 2261 | 398  | 56 | 30.25 | 3.42 | 51.7  |
| chr16 | 21108576 | 21109469 | 894  | 681  | 20 | 32.72 | 4.28 | 49.38 |
| chr16 | 21262440 | 21263019 | 580  | 290  | 16 | 37.66 | 6.57 | 46.06 |
| chr16 | 21400021 | 21401381 | 1361 | 590  | 33 | 35.19 | 4.44 | 47.17 |
| chr16 | 21633985 | 21634747 | 763  | 197  | 17 | 30.3  | 4.11 | 51.54 |
| chr16 | 21849431 | 21850610 | 1180 | 577  | 27 | 36.49 | 4.01 | 47.08 |
| chr16 | 22410439 | 22411292 | 854  | 593  | 20 | 37.94 | 5.34 | 46.46 |
| chr16 | 23056380 | 23057057 | 678  | 280  | 17 | 35.69 | 4.52 | 47.24 |
| chr16 | 23495424 | 23496371 | 948  | 331  | 21 | 36.63 | 6.98 | 46.89 |
| chr16 | 25463682 | 25464874 | 1193 | 728  | 28 | 34.86 | 4.75 | 47.64 |
| chr16 | 25514649 | 25515308 | 660  | 391  | 16 | 32.21 | 6.16 | 49.94 |
| chr16 | 26159053 | 26160122 | 1070 | 531  | 21 | 30.21 | 4.52 | 51.72 |
| chr16 | 26879920 | 26880650 | 731  | 488  | 19 | 37.58 | 5.33 | 45.92 |
| chr16 | 26910983 | 26911958 | 976  | 442  | 20 | 31.01 | 5.75 | 50.49 |
| chr16 | 26916747 | 26917444 | 698  | 281  | 17 | 34.34 | 6.57 | 47.84 |
| chr16 | 28267039 | 28267729 | 691  | 280  | 16 | 30.24 | 5.34 | 51.75 |
| chr16 | 28935778 | 28937206 | 1429 | 756  | 38 | 39.92 | 5.99 | 46.68 |
| chr16 | 29401862 | 29404562 | 2701 | 1442 | 66 | 53.15 | 4.85 | 51.76 |
| chr16 | 29652497 | 29653775 | 1279 | 524  | 27 | 39.02 | 6.98 | 46.15 |
| chr16 | 29937360 | 29938520 | 1161 | 611  | 24 | 32.28 | 6.04 | 50.08 |
| chr16 | 30405786 | 30406798 | 1013 | 279  | 23 | 32.27 | 4.89 | 50.09 |
| chr16 | 30725965 | 30726873 | 909  | 493  | 19 | 30.52 | 5.34 | 51.32 |
| chr16 | 31671724 | 31672755 | 1032 | 276  | 23 | 36.07 | 4.52 | 46.98 |
| chr16 | 32033214 | 32033961 | 748  | 271  | 19 | 40.38 | 5.34 | 46.8  |
| chr16 | 32247522 | 32248444 | 923  | 609  | 21 | 38.11 | 4.93 | 46.34 |
| chr16 | 32336413 | 32338051 | 1639 | 596  | 37 | 55.83 | 4.93 | 53.26 |
| chr16 | 32804265 | 32805662 | 1398 | 510  | 31 | 40.48 | 4.05 | 46.99 |
| chr16 | 33561191 | 33562353 | 1163 | 736  | 24 | 33.27 | 6.98 | 48.95 |
| chr16 | 34711100 | 34711975 | 876  | 593  | 20 | 36.58 | 5.75 | 46.91 |
| chr16 | 35001089 | 35002109 | 1021 | 448  | 22 | 32.64 | 6.16 | 49.3  |
| chr16 | 46680784 | 46681590 | 807  | 474  | 21 | 41.39 | 5.33 | 46.95 |
| chr16 | 46884430 | 46885430 | 1001 | 621  | 25 | 35.23 | 5.82 | 47.24 |
| chr16 | 46942661 | 46944363 | 1703 | 1458 | 38 | 35.96 | 3.74 | 46.99 |
| chr16 | 47111274 | 47112136 | 863  | 263  | 21 | 41.93 | 5.75 | 46.96 |
| chr16 | 47226988 | 47227805 | 818  | 276  | 20 | 33.35 | 4.69 | 48.68 |
| chr16 | 47308121 | 47309873 | 1753 | 560  | 42 | 35.37 | 3.42 | 47.58 |
| chr16 | 47393576 | 47394593 | 1018 | 426  | 22 | 32.8  | 5.34 | 49.43 |
| chr16 | 47398840 | 47400342 | 1503 | 1234 | 31 | 43.18 | 4.52 | 47.49 |
| chr16 | 47865908 | 47867444 | 1537 | 1032 | 30 | 37.88 | 4.52 | 46.66 |
| chr16 | 48865572 | 48866200 | 629  | 288  | 16 | 34.32 | 6.16 | 47.79 |
| chr16 | 49698647 | 49699339 | 693  | 437  | 17 | 34.67 | 4.52 | 47.75 |
| chr16 | 50315607 | 50316453 | 847  | 524  | 20 | 30.03 | 4.19 | 51.48 |
| chr16 | 50805524 | 50806242 | 719  | 453  | 20 | 45.14 | 5.51 | 48.84 |
| chr16 | 51261601 | 51262665 | 1065 | 587  | 21 | 30.45 | 4.52 | 51.29 |
| chr16 | 51613069 | 51613815 | 747  | 510  | 18 | 32.06 | 4.57 | 49.81 |

|       |          |          |      |      |    |       |      |       |
|-------|----------|----------|------|------|----|-------|------|-------|
| chr16 | 51945333 | 51946472 | 1140 | 505  | 24 | 34.4  | 6.16 | 47.75 |
| chr16 | 52286095 | 52286864 | 770  | 228  | 19 | 38.85 | 4.11 | 46.21 |
| chr16 | 52979750 | 52980365 | 616  | 276  | 15 | 30.16 | 5.3  | 51.68 |
| chr16 | 53244973 | 53247776 | 2804 | 1276 | 73 | 56.46 | 4.55 | 53.57 |
| chr16 | 53621030 | 53622530 | 1501 | 291  | 31 | 43.28 | 6.16 | 47.89 |
| chr16 | 53668097 | 53669612 | 1516 | 585  | 35 | 38.12 | 5.37 | 46.27 |
| chr16 | 53958421 | 53959248 | 828  | 260  | 20 | 39.62 | 5.75 | 46.59 |
| chr16 | 54100155 | 54101143 | 989  | 245  | 22 | 34.33 | 4.52 | 47.78 |
| chr16 | 54138131 | 54139203 | 1073 | 612  | 25 | 42.13 | 5.75 | 46.81 |
| chr16 | 54258737 | 54259327 | 591  | 323  | 15 | 32.16 | 5.34 | 49.92 |
| chr16 | 55442498 | 55443330 | 833  | 372  | 18 | 30.55 | 4.93 | 51.23 |
| chr16 | 56032689 | 56034125 | 1437 | 818  | 28 | 35.22 | 5.75 | 47.19 |
| chr16 | 57219053 | 57221726 | 2674 | 2279 | 64 | 30.2  | 3.13 | 51.75 |
| chr16 | 57225672 | 57226693 | 1022 | 383  | 23 | 30.63 | 4.05 | 51.18 |
| chr16 | 58249873 | 58250643 | 771  | 527  | 18 | 34.2  | 4.93 | 47.92 |
| chr16 | 58305127 | 58306013 | 887  | 602  | 20 | 35.92 | 5.34 | 47.03 |
| chr16 | 58848185 | 58849986 | 1802 | 1318 | 40 | 59.08 | 6.57 | 52.66 |
| chr16 | 59540866 | 59541735 | 870  | 618  | 20 | 36.95 | 4.52 | 46.89 |
| chr16 | 59614006 | 59615732 | 1727 | 549  | 35 | 43.65 | 5.75 | 47.94 |
| chr16 | 59678103 | 59678861 | 759  | 275  | 18 | 34.95 | 6.98 | 47.68 |
| chr16 | 59994333 | 59995090 | 758  | 497  | 17 | 30.59 | 5.34 | 51.24 |
| chr16 | 60130935 | 60131880 | 946  | 337  | 21 | 36.75 | 4.93 | 46.92 |
| chr16 | 60285346 | 60286240 | 895  | 613  | 20 | 35.45 | 4.93 | 47.41 |
| chr16 | 60657342 | 60658243 | 902  | 664  | 19 | 30.89 | 4.93 | 50.73 |
| chr16 | 61578338 | 61579234 | 897  | 391  | 20 | 35.33 | 4.93 | 47.42 |
| chr16 | 61745316 | 61746153 | 838  | 263  | 19 | 34.14 | 4.89 | 48.06 |
| chr16 | 62384862 | 62385616 | 755  | 284  | 17 | 30.77 | 4.52 | 50.95 |
| chr16 | 62714623 | 62715501 | 879  | 598  | 19 | 32.14 | 4.52 | 49.88 |
| chr16 | 62834179 | 62835017 | 839  | 568  | 18 | 30.22 | 5.34 | 51.69 |
| chr16 | 63112064 | 63113990 | 1927 | 1378 | 34 | 32.18 | 5.75 | 49.96 |
| chr16 | 63250136 | 63251075 | 940  | 503  | 21 | 37.1  | 5.34 | 46.88 |
| chr16 | 63386657 | 63387525 | 869  | 205  | 19 | 32.71 | 4.11 | 49.41 |
| chr16 | 63387804 | 63388692 | 889  | 477  | 19 | 31.59 | 4.93 | 49.94 |
| chr16 | 63616243 | 63617196 | 954  | 674  | 20 | 32.16 | 4.52 | 49.86 |
| chr16 | 63617454 | 63618257 | 804  | 529  | 21 | 46.08 | 6.57 | 49.26 |
| chr16 | 63779600 | 63780611 | 1012 | 450  | 24 | 31.45 | 4.5  | 49.99 |
| chr16 | 63954977 | 63955562 | 586  | 287  | 20 | 56.62 | 7    | 53.37 |
| chr16 | 64083303 | 64084419 | 1117 | 543  | 25 | 30.66 | 5.3  | 51.04 |
| chr16 | 64220741 | 64222631 | 1891 | 690  | 44 | 55.04 | 5.52 | 53.44 |
| chr16 | 64244972 | 64247313 | 2342 | 1054 | 51 | 37.04 | 4.55 | 47.03 |
| chr16 | 64412789 | 64413524 | 736  | 527  | 18 | 31.22 | 5.16 | 50.53 |
| chr16 | 64417050 | 64418736 | 1687 | 850  | 44 | 49.75 | 5.6  | 51.91 |
| chr16 | 64497607 | 64498700 | 1094 | 658  | 23 | 30.56 | 6.3  | 51.27 |
| chr16 | 64637038 | 64637982 | 945  | 290  | 20 | 32.64 | 4.11 | 49.32 |
| chr16 | 64758172 | 64759214 | 1043 | 650  | 21 | 31.53 | 4.11 | 49.89 |
| chr16 | 65109691 | 65110535 | 845  | 603  | 19 | 34.09 | 4.52 | 48.17 |
| chr16 | 65163411 | 65164058 | 648  | 359  | 18 | 42.92 | 4.93 | 47.44 |
| chr16 | 66388393 | 66389512 | 1120 | 581  | 26 | 43.64 | 6.16 | 47.88 |
| chr16 | 66532520 | 66533354 | 835  | 553  | 18 | 30.44 | 4.52 | 51.32 |
| chr16 | 66762241 | 66763077 | 837  | 256  | 18 | 30.33 | 4.11 | 51.59 |
| chr16 | 66920405 | 66921234 | 830  | 310  | 19 | 34.99 | 4.11 | 47.59 |
| chr16 | 67061995 | 67063910 | 1916 | 380  | 42 | 33.03 | 3.64 | 49.15 |

|       |          |          |      |      |    |       |      |       |
|-------|----------|----------|------|------|----|-------|------|-------|
| chr16 | 67478904 | 67479800 | 897  | 530  | 19 | 31.16 | 5.34 | 50.56 |
| chr16 | 67618886 | 67620580 | 1695 | 582  | 35 | 45.15 | 4.52 | 48.8  |
| chr16 | 67627226 | 67628783 | 1558 | 1353 | 32 | 36.2  | 5.16 | 46.92 |
| chr16 | 67719042 | 67720767 | 1726 | 1028 | 35 | 33.07 | 3.92 | 49.19 |
| chr16 | 67799145 | 67800144 | 1000 | 449  | 21 | 33.74 | 5.75 | 48.62 |
| chr16 | 68183987 | 68185543 | 1557 | 1107 | 31 | 31.56 | 4.33 | 49.94 |
| chr16 | 68201001 | 68201587 | 587  | 286  | 17 | 38.92 | 6.09 | 46.24 |
| chr16 | 68301597 | 68303002 | 1406 | 1044 | 31 | 36.35 | 4.89 | 47.12 |
| chr16 | 68370690 | 68371553 | 864  | 277  | 19 | 32.99 | 4.93 | 49.23 |
| chr16 | 68799332 | 68800184 | 853  | 567  | 21 | 42.6  | 5.75 | 47.33 |
| chr16 | 68845068 | 68845929 | 862  | 599  | 20 | 37.44 | 5.34 | 46.3  |
| chr16 | 69051017 | 69052107 | 1091 | 522  | 23 | 32.99 | 5.75 | 49.23 |
| chr16 | 69232344 | 69234583 | 2240 | 564  | 46 | 43.4  | 5.59 | 47.83 |
| chr16 | 69623572 | 69624625 | 1054 | 585  | 24 | 32.66 | 7    | 49.43 |
| chr16 | 69898321 | 69899321 | 1001 | 542  | 21 | 33.69 | 5.34 | 48.59 |
| chr16 | 69902987 | 69904134 | 1148 | 641  | 25 | 33.37 | 5.33 | 48.69 |
| chr16 | 70124947 | 70125837 | 891  | 273  | 22 | 40.1  | 5.75 | 46.56 |
| chr16 | 71084955 | 71087692 | 2738 | 943  | 77 | 57.53 | 4.72 | 53.54 |
| chr16 | 71117344 | 71120782 | 3439 | 2958 | 89 | 39.27 | 3.17 | 46.43 |
| chr16 | 71345339 | 71346642 | 1304 | 579  | 25 | 30.47 | 6.16 | 51.25 |
| chr16 | 71533948 | 71534845 | 898  | 624  | 19 | 31.11 | 4.11 | 50.64 |
| chr16 | 71561860 | 71562762 | 903  | 265  | 21 | 39.34 | 4.52 | 46.61 |
| chr16 | 71716287 | 71717593 | 1307 | 665  | 25 | 30.34 | 8.22 | 51.6  |
| chr16 | 71777817 | 71778622 | 806  | 457  | 20 | 31.49 | 5.14 | 49.93 |
| chr16 | 72389172 | 72390284 | 1113 | 481  | 24 | 35.78 | 5.34 | 47.17 |
| chr16 | 72799686 | 72800575 | 890  | 553  | 19 | 31.54 | 6.57 | 49.9  |
| chr16 | 73851319 | 73852005 | 687  | 314  | 16 | 30.49 | 5.75 | 51.31 |
| chr16 | 73989550 | 73990572 | 1023 | 399  | 22 | 32.54 | 6.57 | 49.37 |
| chr16 | 74470979 | 74472097 | 1119 | 588  | 24 | 35.47 | 4.93 | 47.43 |
| chr16 | 74570440 | 74571494 | 1055 | 262  | 29 | 41.06 | 5.29 | 46.42 |
| chr16 | 74639466 | 74641256 | 1791 | 1322 | 39 | 37.19 | 5.65 | 46.85 |
| chr16 | 75038866 | 75039878 | 1013 | 631  | 23 | 37.13 | 5.34 | 46.91 |
| chr16 | 75860406 | 75861327 | 922  | 284  | 22 | 30.08 | 4.59 | 51.57 |
| chr16 | 75862597 | 75863947 | 1351 | 482  | 33 | 41.3  | 6.16 | 46.94 |
| chr16 | 76053973 | 76054872 | 900  | 272  | 19 | 31    | 4.11 | 50.47 |
| chr16 | 76251760 | 76252788 | 1029 | 719  | 21 | 32.23 | 6.16 | 50.02 |
| chr16 | 76447943 | 76449296 | 1354 | 692  | 28 | 31.43 | 5.1  | 50.03 |
| chr16 | 76479491 | 76480466 | 976  | 457  | 20 | 31.01 | 4.93 | 50.49 |
| chr16 | 76960743 | 76961726 | 984  | 362  | 22 | 34.6  | 6.98 | 47.68 |
| chr16 | 77022450 | 77023444 | 995  | 516  | 22 | 34.01 | 5.34 | 48.54 |
| chr16 | 77091320 | 77092070 | 751  | 284  | 18 | 35.47 | 5.34 | 47.45 |
| chr16 | 77135651 | 77136442 | 792  | 501  | 18 | 32.91 | 4.93 | 49.22 |
| chr16 | 78096852 | 78097751 | 900  | 433  | 20 | 31.24 | 4.95 | 50.47 |
| chr16 | 78321078 | 78322021 | 944  | 590  | 21 | 36.86 | 6.16 | 46.73 |
| chr16 | 78400082 | 78400763 | 682  | 290  | 17 | 35.42 | 5.75 | 47.51 |
| chr16 | 79010632 | 79011851 | 1220 | 519  | 25 | 34.29 | 6.16 | 47.84 |
| chr16 | 79281980 | 79282780 | 801  | 534  | 18 | 32.38 | 3.7  | 49.75 |
| chr16 | 80461856 | 80462547 | 692  | 374  | 16 | 30.18 | 4.52 | 51.67 |
| chr16 | 81415783 | 81416631 | 849  | 255  | 20 | 38.26 | 4.93 | 46.3  |
| chr16 | 81933855 | 81934817 | 963  | 531  | 21 | 35.77 | 5.75 | 47.11 |
| chr16 | 81938653 | 81939836 | 1184 | 507  | 32 | 44.07 | 5.92 | 48.08 |
| chr16 | 82013981 | 82014952 | 972  | 681  | 24 | 43.48 | 5.3  | 48.01 |

|       |          |          |      |      |    |       |      |       |
|-------|----------|----------|------|------|----|-------|------|-------|
| chr16 | 82156214 | 82157054 | 841  | 553  | 20 | 33.57 | 4.47 | 48.63 |
| chr16 | 82159148 | 82160145 | 998  | 559  | 23 | 37.98 | 4.93 | 46.41 |
| chr16 | 82235369 | 82236062 | 694  | 417  | 16 | 30.06 | 5.75 | 51.46 |
| chr16 | 82703953 | 82704868 | 916  | 588  | 21 | 38.54 | 6.16 | 46.22 |
| chr16 | 82865893 | 82866749 | 857  | 399  | 19 | 33.39 | 5.75 | 48.72 |
| chr16 | 83550031 | 83550853 | 823  | 330  | 20 | 30.45 | 4.45 | 51.31 |
| chr16 | 83639064 | 83640476 | 1413 | 498  | 33 | 52.02 | 4.93 | 51.04 |
| chr16 | 83650533 | 83651156 | 624  | 279  | 16 | 34.67 | 5.75 | 47.77 |
| chr16 | 83727168 | 83727886 | 719  | 246  | 19 | 33.08 | 4.11 | 49.2  |
| chr16 | 84823871 | 84824821 | 951  | 688  | 22 | 36.46 | 5.75 | 47.14 |
| chr16 | 85177317 | 85178212 | 896  | 472  | 22 | 39.78 | 6.16 | 46.6  |
| chr16 | 85402306 | 85403131 | 826  | 339  | 23 | 49.41 | 6.16 | 51.61 |
| chr16 | 87498583 | 87499589 | 1007 | 568  | 23 | 37.47 | 5.75 | 46.23 |
| chr16 | 88921204 | 88922038 | 835  | 287  | 19 | 34.69 | 5.34 | 47.81 |
| chr16 | 89315668 | 89316544 | 877  | 510  | 19 | 32.26 | 4.93 | 49.99 |
| chr16 | 90022277 | 90023811 | 1535 | 1258 | 37 | 47.61 | 4.21 | 49.12 |
| chr17 | 958758   | 959525   | 768  | 238  | 17 | 30.01 | 4.93 | 51.49 |
| chr17 | 1358858  | 1360400  | 1543 | 847  | 41 | 36.39 | 3.42 | 47.15 |
| chr17 | 1989051  | 1990214  | 1164 | 677  | 24 | 32.8  | 5.3  | 49.46 |
| chr17 | 2140451  | 2142015  | 1565 | 958  | 36 | 47.35 | 3.72 | 48.35 |
| chr17 | 2169827  | 2171213  | 1387 | 605  | 29 | 36.1  | 6.85 | 47    |
| chr17 | 2404137  | 2404973  | 837  | 253  | 19 | 34.57 | 4.93 | 47.74 |
| chr17 | 2502078  | 2503260  | 1183 | 558  | 26 | 33.97 | 5.96 | 48.62 |
| chr17 | 2505922  | 2507041  | 1120 | 754  | 24 | 31.73 | 5    | 49.74 |
| chr17 | 2845023  | 2846638  | 1616 | 258  | 35 | 49.06 | 5.75 | 50.55 |
| chr17 | 3321610  | 3323058  | 1449 | 962  | 32 | 49.98 | 4.52 | 51.58 |
| chr17 | 4167059  | 4168584  | 1526 | 663  | 46 | 73.24 | 6.53 | 57.65 |
| chr17 | 4323596  | 4325233  | 1638 | 960  | 41 | 73.22 | 5.75 | 56.98 |
| chr17 | 4829673  | 4830496  | 824  | 278  | 19 | 35.36 | 5.75 | 47.47 |
| chr17 | 4841188  | 4842827  | 1640 | 271  | 31 | 30.66 | 3.14 | 51.05 |
| chr17 | 4883137  | 4883959  | 823  | 323  | 19 | 32.17 | 5    | 49.92 |
| chr17 | 4890999  | 4892361  | 1363 | 631  | 30 | 33.72 | 3.42 | 48.61 |
| chr17 | 4961146  | 4962010  | 865  | 470  | 20 | 37.26 | 4.52 | 46.48 |
| chr17 | 5490674  | 5491951  | 1278 | 626  | 26 | 35.25 | 5.34 | 47.32 |
| chr17 | 6198681  | 6199513  | 833  | 267  | 19 | 34.81 | 5.34 | 47.51 |
| chr17 | 6423053  | 6424007  | 955  | 377  | 21 | 32.14 | 4.95 | 49.83 |
| chr17 | 6907858  | 6908852  | 995  | 283  | 22 | 34.01 | 4.52 | 48.54 |
| chr17 | 7005967  | 7007072  | 1106 | 397  | 24 | 36.15 | 4.11 | 47    |
| chr17 | 7155025  | 7156594  | 1570 | 551  | 42 | 31.83 | 4.65 | 49.77 |
| chr17 | 7246181  | 7246905  | 725  | 451  | 17 | 32.59 | 5.34 | 49.4  |
| chr17 | 7877294  | 7878098  | 805  | 357  | 18 | 32.14 | 5.34 | 49.83 |
| chr17 | 8131694  | 8132548  | 855  | 573  | 19 | 30.33 | 5    | 51.65 |
| chr17 | 8241136  | 8241831  | 696  | 264  | 19 | 34.7  | 4.79 | 47.74 |
| chr17 | 8338589  | 8340564  | 1976 | 1302 | 45 | 38.33 | 4.05 | 46.37 |
| chr17 | 8457197  | 8458397  | 1201 | 652  | 25 | 35.21 | 4.93 | 47.22 |
| chr17 | 8545145  | 8545990  | 846  | 408  | 20 | 38.45 | 6.16 | 46.34 |
| chr17 | 9477821  | 9478719  | 899  | 332  | 19 | 31.05 | 4.93 | 50.69 |
| chr17 | 10009449 | 10010367 | 919  | 421  | 22 | 30.25 | 4.94 | 51.7  |
| chr17 | 10038254 | 10039379 | 1126 | 462  | 24 | 35.11 | 4.93 | 47.42 |
| chr17 | 10090579 | 10091402 | 824  | 459  | 18 | 31.05 | 6.16 | 50.62 |
| chr17 | 11654139 | 11655003 | 865  | 575  | 20 | 37.26 | 5.34 | 46.48 |
| chr17 | 11942933 | 11943905 | 973  | 686  | 20 | 31.17 | 4.11 | 50.55 |

|       |          |          |      |      |     |        |      |       |
|-------|----------|----------|------|------|-----|--------|------|-------|
| chr17 | 12022065 | 12023016 | 952  | 665  | 20  | 32.27  | 4.93 | 50.07 |
| chr17 | 12571088 | 12572370 | 1283 | 741  | 25  | 31.38  | 5.34 | 50.21 |
| chr17 | 12914626 | 12915374 | 749  | 512  | 18  | 35.6   | 5.34 | 47.18 |
| chr17 | 13127205 | 13128490 | 1286 | 684  | 28  | 42.61  | 6.98 | 47.35 |
| chr17 | 13647489 | 13648249 | 761  | 210  | 17  | 30.42  | 4.11 | 51.28 |
| chr17 | 14476594 | 14477297 | 704  | 283  | 17  | 33.94  | 4.93 | 48.68 |
| chr17 | 15429378 | 15430592 | 1215 | 650  | 27  | 42.41  | 6.16 | 47.11 |
| chr17 | 15629940 | 15630609 | 670  | 414  | 18  | 32.22  | 5.14 | 49.99 |
| chr17 | 16118037 | 16119860 | 1824 | 423  | 46  | 43     | 5.56 | 47.43 |
| chr17 | 16798041 | 16798985 | 945  | 657  | 20  | 32.64  | 5.34 | 49.32 |
| chr17 | 17286081 | 17286959 | 879  | 659  | 19  | 32.14  | 4.11 | 49.88 |
| chr17 | 17632326 | 17634126 | 1801 | 517  | 39  | 34.48  | 4.85 | 47.73 |
| chr17 | 18046715 | 18047693 | 979  | 698  | 20  | 30.86  | 4.11 | 50.91 |
| chr17 | 18595518 | 18596229 | 712  | 291  | 17  | 33.42  | 5.75 | 48.71 |
| chr17 | 18693290 | 18694614 | 1325 | 693  | 30  | 35.6   | 5.82 | 47.22 |
| chr17 | 18694920 | 18696390 | 1471 | 733  | 34  | 41.56  | 4.28 | 47.19 |
| chr17 | 18735155 | 18736927 | 1773 | 1422 | 37  | 42.43  | 4.19 | 47.28 |
| chr17 | 19895743 | 19897080 | 1338 | 765  | 34  | 45.77  | 4.79 | 50    |
| chr17 | 20775504 | 20776750 | 1247 | 596  | 35  | 38.74  | 5.57 | 46.16 |
| chr17 | 21029887 | 21030949 | 1063 | 568  | 24  | 34.03  | 4.19 | 48.6  |
| chr17 | 21224925 | 21229837 | 4913 | 4202 | 149 | 49.99  | 3.48 | 51.71 |
| chr17 | 21307202 | 21310551 | 3350 | 1008 | 86  | 33.46  | 4.71 | 48.57 |
| chr17 | 21506653 | 21511771 | 5119 | 3039 | 151 | 71.54  | 4.38 | 53.33 |
| chr17 | 21760213 | 21760792 | 580  | 290  | 15  | 30.44  | 5.84 | 51.29 |
| chr17 | 21970902 | 21971904 | 1003 | 576  | 22  | 33.58  | 5.75 | 48.66 |
| chr17 | 22091117 | 22092584 | 1468 | 1001 | 32  | 48.93  | 4.93 | 50.27 |
| chr17 | 25487627 | 25489160 | 1534 | 1059 | 35  | 31.78  | 3.42 | 49.86 |
| chr17 | 25490536 | 25492438 | 1903 | 1208 | 40  | 40.26  | 5.3  | 46.73 |
| chr17 | 25511518 | 25512434 | 917  | 206  | 20  | 34.18  | 4.11 | 47.96 |
| chr17 | 25680306 | 25681889 | 1584 | 400  | 30  | 39.35  | 4.11 | 46.77 |
| chr17 | 25955740 | 25956367 | 628  | 290  | 16  | 31.05  | 5.71 | 50.76 |
| chr17 | 26978370 | 26979945 | 1576 | 1313 | 34  | 43.84  | 4.33 | 47.92 |
| chr17 | 27109816 | 27110467 | 652  | 265  | 17  | 31.02  | 4.28 | 50.48 |
| chr17 | 27814346 | 27815654 | 1309 | 537  | 28  | 41.39  | 5.75 | 46.99 |
| chr17 | 27837241 | 27838089 | 849  | 259  | 20  | 37.22  | 5.24 | 46.82 |
| chr17 | 28340733 | 28342368 | 1636 | 432  | 32  | 32.81  | 3.68 | 49.41 |
| chr17 | 28344862 | 28345605 | 744  | 331  | 21  | 34.74  | 5.29 | 47.65 |
| chr17 | 28725006 | 28725941 | 936  | 389  | 23  | 41.74  | 5.34 | 47.25 |
| chr17 | 28755204 | 28756733 | 1530 | 969  | 35  | 35.99  | 4.28 | 47.15 |
| chr17 | 28831637 | 28832992 | 1356 | 928  | 33  | 34.17  | 4.36 | 48    |
| chr17 | 29265456 | 29266630 | 1175 | 320  | 24  | 32.69  | 4.93 | 49.39 |
| chr17 | 29336757 | 29337903 | 1147 | 600  | 32  | 54.22  | 5.48 | 53.9  |
| chr17 | 29557768 | 29560391 | 2624 | 417  | 60  | 30.71  | 3.55 | 50.99 |
| chr17 | 29654278 | 29655431 | 1154 | 436  | 37  | 31.21  | 4.49 | 50.54 |
| chr17 | 29851786 | 29853390 | 1605 | 453  | 37  | 41.96  | 4.11 | 47.1  |
| chr17 | 30233429 | 30234918 | 1490 | 804  | 32  | 34.25  | 3.42 | 47.91 |
| chr17 | 30333911 | 30336059 | 2149 | 558  | 43  | 49.62  | 6.57 | 51.29 |
| chr17 | 30372331 | 30372998 | 668  | 416  | 16  | 31.69  | 4.93 | 49.8  |
| chr17 | 30535024 | 30536610 | 1587 | 1306 | 39  | 34.67  | 4.57 | 47.77 |
| chr17 | 30710395 | 30711393 | 999  | 496  | 23  | 33.63  | 5.33 | 48.75 |
| chr17 | 30891938 | 30892875 | 938  | 520  | 22  | 37.22  | 6.16 | 46.81 |
| chr17 | 31149075 | 31150378 | 1304 | 606  | 273 | 110.23 | 7.51 | 23.81 |



|       |          |          |      |      |     |       |      |       |
|-------|----------|----------|------|------|-----|-------|------|-------|
| chr17 | 32257528 | 32258923 | 1396 | 843  | 27  | 33.49 | 6.16 | 48.7  |
| chr17 | 32361245 | 32362724 | 1480 | 886  | 32  | 48.29 | 5.34 | 49.41 |
| chr17 | 32364754 | 32365357 | 604  | 275  | 16  | 32.74 | 5.71 | 49.37 |
| chr17 | 32681280 | 32682232 | 953  | 524  | 21  | 36.34 | 4.93 | 47.04 |
| chr17 | 33249189 | 33250055 | 867  | 540  | 20  | 37.13 | 5.75 | 46.94 |
| chr17 | 33613289 | 33614409 | 1121 | 692  | 24  | 35.37 | 4.93 | 47.53 |
| chr17 | 33873001 | 33874181 | 1181 | 653  | 24  | 32.41 | 5.75 | 49.64 |
| chr17 | 33930248 | 33931143 | 896  | 273  | 20  | 35.39 | 4.93 | 47.63 |
| chr17 | 34956523 | 34958246 | 1724 | 1347 | 42  | 41.94 | 5.15 | 46.97 |
| chr17 | 34975607 | 34976446 | 840  | 569  | 22  | 43.5  | 4.93 | 48.04 |
| chr17 | 35329633 | 35331518 | 1886 | 1520 | 41  | 32.89 | 4.17 | 49.35 |
| chr17 | 35405577 | 35406452 | 876  | 348  | 20  | 36.19 | 6.12 | 46.89 |
| chr17 | 35523492 | 35525594 | 2103 | 1537 | 50  | 51.34 | 5.49 | 51.48 |
| chr17 | 35611624 | 35612518 | 895  | 276  | 21  | 39.84 | 4.93 | 46.65 |
| chr17 | 35795837 | 35797172 | 1336 | 606  | 30  | 48.05 | 5.34 | 49.28 |
| chr17 | 35907482 | 35908959 | 1478 | 798  | 37  | 65.53 | 6.98 | 53.76 |
| chr17 | 36021333 | 36022100 | 768  | 276  | 18  | 32.9  | 5.18 | 49.34 |
| chr17 | 37007883 | 37008610 | 728  | 447  | 26  | 45.9  | 5.25 | 49.69 |
| chr17 | 37349861 | 37350554 | 694  | 305  | 17  | 34.6  | 4.52 | 47.73 |
| chr17 | 37366179 | 37367448 | 1270 | 721  | 25  | 31.96 | 6.98 | 49.79 |
| chr17 | 37657223 | 37658526 | 1304 | 797  | 27  | 37.77 | 4.93 | 46.61 |
| chr17 | 37764984 | 37766270 | 1287 | 548  | 27  | 38.13 | 4.89 | 46.29 |
| chr17 | 38347913 | 38349182 | 1270 | 598  | 28  | 42.96 | 4.89 | 47.44 |
| chr17 | 38407900 | 38408512 | 613  | 325  | 18  | 39.61 | 5.83 | 46.56 |
| chr17 | 38487109 | 38487735 | 627  | 351  | 18  | 34.44 | 4.7  | 47.75 |
| chr17 | 38567044 | 38568629 | 1586 | 338  | 36  | 39.52 | 4.45 | 46.95 |
| chr17 | 38862018 | 38862921 | 904  | 276  | 19  | 30.79 | 4.93 | 50.91 |
| chr17 | 40476358 | 40477510 | 1153 | 465  | 35  | 46.87 | 5.99 | 47.36 |
| chr17 | 40591332 | 40593103 | 1772 | 1232 | 38  | 51.37 | 6.07 | 51.62 |
| chr17 | 40811805 | 40814519 | 2715 | 587  | 55  | 52.36 | 5.1  | 50.77 |
| chr17 | 41242931 | 41247066 | 4136 | 1403 | 130 | 82.82 | 3.43 | 47.92 |
| chr17 | 41703767 | 41704682 | 916  | 634  | 20  | 34.24 | 6.16 | 47.9  |
| chr17 | 42085481 | 42086515 | 1035 | 451  | 29  | 42.4  | 6.85 | 47.12 |
| chr17 | 42440263 | 42441510 | 1248 | 567  | 25  | 32.97 | 6.57 | 49.29 |
| chr17 | 42535964 | 42538122 | 2159 | 1421 | 46  | 55.81 | 5.35 | 53.36 |
| chr17 | 42579298 | 42581676 | 2379 | 644  | 58  | 30.02 | 5.38 | 51.48 |
| chr17 | 43113878 | 43114622 | 745  | 462  | 23  | 51.11 | 7.99 | 51.78 |
| chr17 | 43324182 | 43324858 | 677  | 389  | 21  | 39.96 | 5.92 | 46.78 |
| chr17 | 43428851 | 43429745 | 895  | 428  | 23  | 44.44 | 6.57 | 48.48 |
| chr17 | 43464649 | 43465578 | 930  | 616  | 22  | 37.69 | 6.16 | 46.43 |
| chr17 | 43485877 | 43486929 | 1053 | 452  | 21  | 30.04 | 5.64 | 51.46 |
| chr17 | 44106471 | 44107650 | 1180 | 841  | 26  | 40.24 | 4.52 | 46.69 |
| chr17 | 45175540 | 45176808 | 1269 | 495  | 28  | 30.41 | 4.03 | 51.39 |
| chr17 | 45184519 | 45185405 | 887  | 254  | 21  | 40.35 | 4.52 | 46.88 |
| chr17 | 46381186 | 46382492 | 1307 | 647  | 28  | 41.5  | 7.8  | 47.14 |
| chr17 | 46382713 | 46383805 | 1093 | 261  | 25  | 30.17 | 4.45 | 51.66 |
| chr17 | 46743112 | 46744777 | 1666 | 1187 | 31  | 35.79 | 4.93 | 47.11 |
| chr17 | 47730478 | 47731475 | 998  | 667  | 24  | 37.04 | 4.52 | 46.97 |
| chr17 | 48980254 | 48981585 | 1332 | 1046 | 33  | 56.92 | 6.57 | 52.71 |
| chr17 | 49084997 | 49086492 | 1496 | 818  | 33  | 32.61 | 4.7  | 49.39 |
| chr17 | 49111502 | 49113036 | 1535 | 1244 | 33  | 35.75 | 4.33 | 47.06 |
| chr17 | 49251390 | 49252229 | 840  | 558  | 19  | 34.39 | 4.93 | 47.73 |

|       |          |          |      |      |    |       |      |       |
|-------|----------|----------|------|------|----|-------|------|-------|
| chr17 | 49374728 | 49375481 | 754  | 538  | 19 | 30.77 | 4.11 | 50.95 |
| chr17 | 49581309 | 49582740 | 1432 | 692  | 36 | 63.99 | 4.93 | 54.04 |
| chr17 | 49850202 | 49850874 | 673  | 394  | 16 | 31.37 | 5.75 | 50.2  |
| chr17 | 50118282 | 50118958 | 677  | 394  | 16 | 31.11 | 5.75 | 50.68 |
| chr17 | 50430255 | 50430984 | 730  | 362  | 17 | 32.28 | 6.16 | 50.02 |
| chr17 | 50449611 | 50450855 | 1245 | 680  | 26 | 36.86 | 4.93 | 46.77 |
| chr17 | 50714956 | 50716260 | 1305 | 589  | 26 | 33.99 | 4.93 | 48.54 |
| chr17 | 51694735 | 51695818 | 1084 | 369  | 25 | 41.49 | 5.75 | 47.06 |
| chr17 | 52124984 | 52125847 | 864  | 406  | 19 | 32.99 | 4.93 | 49.23 |
| chr17 | 52246339 | 52247703 | 1365 | 545  | 30 | 46.43 | 5.75 | 48.39 |
| chr17 | 52993709 | 52994763 | 1055 | 777  | 24 | 38.93 | 4.93 | 46.25 |
| chr17 | 53107463 | 53109073 | 1611 | 340  | 30 | 32.88 | 4.19 | 49.31 |
| chr17 | 53464089 | 53465253 | 1165 | 591  | 24 | 32.75 | 5.3  | 49.4  |
| chr17 | 53529985 | 53530811 | 827  | 249  | 18 | 30.88 | 4.52 | 50.73 |
| chr17 | 53929594 | 53930586 | 993  | 267  | 28 | 48.03 | 6.16 | 49.13 |
| chr17 | 53983792 | 53984899 | 1108 | 649  | 23 | 32.15 | 4.93 | 49.87 |
| chr17 | 54193791 | 54194944 | 1154 | 671  | 25 | 37.61 | 6.16 | 45.75 |
| chr17 | 54592754 | 54593701 | 948  | 259  | 21 | 36.63 | 4.52 | 46.89 |
| chr17 | 54906847 | 54908048 | 1202 | 499  | 26 | 39.07 | 6.16 | 46.27 |
| chr17 | 54911341 | 54912154 | 814  | 263  | 20 | 36.42 | 4.19 | 47.17 |
| chr17 | 55286770 | 55287617 | 848  | 626  | 19 | 33.92 | 4.52 | 48.7  |
| chr17 | 55779049 | 55779866 | 818  | 265  | 18 | 31.39 | 4.93 | 50.18 |
| chr17 | 56065239 | 56066678 | 1440 | 404  | 36 | 34.93 | 4.1  | 47.6  |
| chr17 | 56067458 | 56069095 | 1638 | 827  | 41 | 39.49 | 4.64 | 46.96 |
| chr17 | 56289422 | 56290354 | 933  | 354  | 24 | 37.24 | 4.94 | 46.68 |
| chr17 | 56335800 | 56337001 | 1202 | 600  | 27 | 34.02 | 4.64 | 48.57 |
| chr17 | 56609002 | 56610060 | 1059 | 362  | 23 | 34.63 | 5.75 | 47.79 |
| chr17 | 56771682 | 56773014 | 1333 | 874  | 33 | 36.66 | 5.71 | 47    |
| chr17 | 56853443 | 56854400 | 958  | 669  | 21 | 36.06 | 4.52 | 46.97 |
| chr17 | 56915484 | 56916712 | 1229 | 617  | 26 | 37.67 | 4.93 | 46.37 |
| chr17 | 56933941 | 56934858 | 918  | 280  | 19 | 30.05 | 4.52 | 51.47 |
| chr17 | 58012690 | 58014150 | 1461 | 735  | 32 | 41.68 | 7.07 | 47.2  |
| chr17 | 58154537 | 58156293 | 1757 | 1349 | 42 | 35.18 | 4.28 | 47.11 |
| chr17 | 58377150 | 58378229 | 1080 | 384  | 31 | 47.23 | 5.29 | 47.99 |
| chr17 | 58530904 | 58533229 | 2326 | 1705 | 49 | 37.19 | 2.85 | 46.87 |
| chr17 | 58544863 | 58546028 | 1166 | 289  | 30 | 43.18 | 4.03 | 47.44 |
| chr17 | 58676927 | 58678564 | 1638 | 409  | 48 | 42.24 | 5.63 | 46.99 |
| chr17 | 58901686 | 58902621 | 936  | 449  | 21 | 37.33 | 5.75 | 46.7  |
| chr17 | 59664713 | 59665853 | 1141 | 600  | 28 | 41.86 | 4.69 | 47.12 |
| chr17 | 59727809 | 59728963 | 1155 | 455  | 25 | 37.56 | 4.93 | 45.98 |
| chr17 | 59958465 | 59960023 | 1559 | 667  | 40 | 55.5  | 5.82 | 53.9  |
| chr17 | 60020555 | 60021440 | 886  | 496  | 24 | 45.67 | 6.93 | 49.89 |
| chr17 | 60051437 | 60053034 | 1598 | 1024 | 33 | 35.18 | 5.21 | 47.1  |
| chr17 | 61313699 | 61314881 | 1183 | 489  | 26 | 40.08 | 6.16 | 46.6  |
| chr17 | 61580035 | 61581019 | 985  | 290  | 21 | 34.55 | 4.11 | 47.78 |
| chr17 | 61722273 | 61723403 | 1131 | 667  | 24 | 32.45 | 5.51 | 49.54 |
| chr17 | 61784723 | 61785870 | 1148 | 490  | 26 | 35.13 | 4.42 | 47.35 |
| chr17 | 61999880 | 62002636 | 2757 | 2040 | 65 | 45.44 | 4.01 | 49.67 |
| chr17 | 62093065 | 62093915 | 851  | 350  | 20 | 38.13 | 5.75 | 46.27 |
| chr17 | 62104490 | 62105320 | 831  | 471  | 25 | 59.42 | 6.98 | 54.79 |
| chr17 | 62486154 | 62487706 | 1553 | 1013 | 34 | 31.16 | 3.59 | 50.56 |
| chr17 | 62644107 | 62645004 | 898  | 622  | 21 | 39.65 | 6.57 | 46.42 |

|       |          |          |      |      |    |       |      |       |
|-------|----------|----------|------|------|----|-------|------|-------|
| chr17 | 64135997 | 64137146 | 1150 | 629  | 26 | 31.31 | 4.15 | 50.32 |
| chr17 | 65359374 | 65360257 | 884  | 288  | 23 | 35.69 | 4.89 | 47.2  |
| chr17 | 65478002 | 65478903 | 902  | 445  | 20 | 35.04 | 5.34 | 47.43 |
| chr17 | 65696677 | 65697548 | 872  | 241  | 20 | 36.83 | 4.11 | 46.86 |
| chr17 | 65726285 | 65727289 | 1005 | 519  | 24 | 41.88 | 5.75 | 47    |
| chr17 | 65729323 | 65731401 | 2079 | 1245 | 51 | 78.23 | 5.84 | 57.14 |
| chr17 | 65838583 | 65839458 | 876  | 276  | 24 | 36.85 | 5.6  | 46.8  |
| chr17 | 66118208 | 66118895 | 688  | 270  | 16 | 30.42 | 4.93 | 51.34 |
| chr17 | 66243300 | 66244882 | 1583 | 717  | 41 | 35.57 | 5.35 | 47.16 |
| chr17 | 66296171 | 66297173 | 1003 | 275  | 24 | 31.39 | 4.79 | 50.2  |
| chr17 | 66303583 | 66304735 | 1153 | 670  | 23 | 30.03 | 6.98 | 51.47 |
| chr17 | 66719433 | 66720240 | 808  | 563  | 18 | 31.97 | 4.52 | 49.79 |
| chr17 | 67379627 | 67381268 | 1642 | 247  | 36 | 51.64 | 4.11 | 51.45 |
| chr17 | 67959178 | 67960055 | 878  | 638  | 23 | 45.61 | 4.93 | 50.11 |
| chr17 | 68587833 | 68588604 | 772  | 385  | 18 | 34.13 | 4.52 | 48.1  |
| chr17 | 69030978 | 69031835 | 858  | 408  | 20 | 37.69 | 6.16 | 46.5  |
| chr17 | 69505647 | 69506287 | 641  | 291  | 16 | 33.48 | 6.16 | 48.68 |
| chr17 | 69826048 | 69827422 | 1375 | 746  | 27 | 34.42 | 6.57 | 47.82 |
| chr17 | 69902557 | 69903467 | 911  | 475  | 23 | 43.36 | 6.16 | 47.84 |
| chr17 | 69985613 | 69986473 | 861  | 283  | 22 | 42.06 | 5.75 | 46.99 |
| chr17 | 72413534 | 72414362 | 829  | 270  | 18 | 30.77 | 6.16 | 50.95 |
| chr17 | 73268358 | 73269488 | 1131 | 533  | 23 | 31.05 | 5.75 | 50.68 |
| chr17 | 74435461 | 74436475 | 1015 | 435  | 22 | 31.94 | 5.64 | 49.77 |
| chr17 | 75033626 | 75034492 | 867  | 588  | 19 | 32.82 | 5.34 | 49.42 |
| chr17 | 75137505 | 75139566 | 2062 | 847  | 52 | 48.34 | 4.35 | 49.35 |
| chr17 | 75327231 | 75328575 | 1345 | 566  | 30 | 47.54 | 6.98 | 48.77 |
| chr17 | 75999730 | 76001351 | 1622 | 1330 | 34 | 48.75 | 4.93 | 50.58 |
| chr17 | 76053545 | 76054687 | 1143 | 525  | 23 | 30.49 | 5.75 | 51.27 |
| chr17 | 78263302 | 78264137 | 836  | 254  | 18 | 30.38 | 4.52 | 51.65 |
| chr17 | 78785987 | 78786986 | 1000 | 614  | 21 | 33.74 | 4.93 | 48.62 |
| chr17 | 78806544 | 78807139 | 596  | 307  | 18 | 47.35 | 6.57 | 48.39 |
| chr17 | 80595050 | 80596001 | 952  | 609  | 20 | 32.27 | 4.52 | 50.07 |
| chr18 | 9856     | 10782    | 927  | 289  | 34 | 62.3  | 9.52 | 54.94 |
| chr18 | 73123    | 73905    | 783  | 530  | 18 | 33.46 | 6.57 | 48.67 |
| chr18 | 428686   | 429681   | 996  | 400  | 20 | 30.01 | 4.93 | 51.45 |
| chr18 | 1181087  | 1182269  | 1183 | 704  | 29 | 52.97 | 5.34 | 50.57 |
| chr18 | 1455091  | 1456406  | 1316 | 573  | 27 | 37.18 | 5.34 | 46.88 |
| chr18 | 2101721  | 2102622  | 902  | 694  | 19 | 30.53 | 4.08 | 51.26 |
| chr18 | 2167726  | 2168545  | 820  | 577  | 18 | 31.28 | 4.11 | 50.36 |
| chr18 | 2255749  | 2256526  | 778  | 492  | 22 | 37.5  | 6.16 | 46.01 |
| chr18 | 2353650  | 2354538  | 889  | 282  | 22 | 32.51 | 4.64 | 49.39 |
| chr18 | 2502996  | 2503856  | 861  | 575  | 19 | 33.16 | 4.52 | 49.11 |
| chr18 | 2533943  | 2535595  | 1653 | 544  | 37 | 53.33 | 5.24 | 51.54 |
| chr18 | 2889229  | 2890011  | 783  | 494  | 19 | 37.98 | 5.34 | 46.38 |
| chr18 | 2949026  | 2951535  | 2510 | 1196 | 57 | 37.34 | 3.71 | 46.85 |
| chr18 | 3957719  | 3959101  | 1383 | 789  | 29 | 41.51 | 5.34 | 47.23 |
| chr18 | 4972934  | 4973882  | 949  | 636  | 20 | 32.43 | 6.57 | 49.57 |
| chr18 | 5183144  | 5184047  | 904  | 410  | 22 | 39.28 | 5.75 | 46.47 |
| chr18 | 5240060  | 5241479  | 1420 | 837  | 33 | 37.64 | 5.48 | 45.94 |
| chr18 | 5462129  | 5463171  | 1043 | 476  | 21 | 31.53 | 6.16 | 49.89 |
| chr18 | 5673869  | 5674743  | 875  | 563  | 21 | 41.13 | 6.98 | 46.39 |
| chr18 | 5821108  | 5821771  | 664  | 411  | 16 | 31.95 | 4.93 | 49.78 |

|       |          |          |      |      |    |       |      |       |
|-------|----------|----------|------|------|----|-------|------|-------|
| chr18 | 6267203  | 6268076  | 874  | 376  | 22 | 41.2  | 5.75 | 46.62 |
| chr18 | 6452788  | 6453378  | 591  | 291  | 16 | 37.12 | 5.75 | 46.92 |
| chr18 | 6461630  | 6463116  | 1487 | 736  | 32 | 42.01 | 6.85 | 47.03 |
| chr18 | 7915355  | 7915953  | 599  | 337  | 15 | 31.61 | 5.34 | 49.96 |
| chr18 | 7958935  | 7959966  | 1032 | 785  | 22 | 32.08 | 4.52 | 49.81 |
| chr18 | 9179612  | 9180432  | 821  | 366  | 22 | 35.11 | 4.5  | 47.4  |
| chr18 | 9213118  | 9214331  | 1214 | 749  | 33 | 30.36 | 5.01 | 51.66 |
| chr18 | 9563059  | 9563901  | 843  | 484  | 20 | 35.17 | 4.62 | 47.09 |
| chr18 | 9617131  | 9618001  | 871  | 586  | 22 | 31.44 | 4.45 | 49.98 |
| chr18 | 9913238  | 9914485  | 1248 | 800  | 33 | 33.89 | 6.28 | 48.61 |
| chr18 | 9957254  | 9958955  | 1702 | 267  | 35 | 38.84 | 4.95 | 46.23 |
| chr18 | 9965272  | 9965893  | 622  | 335  | 15 | 30.07 | 5.34 | 51.52 |
| chr18 | 10027438 | 10028639 | 1202 | 585  | 24 | 31.43 | 6.16 | 50.02 |
| chr18 | 10039587 | 10040684 | 1098 | 548  | 24 | 36.57 | 5.75 | 46.88 |
| chr18 | 10536475 | 10537605 | 1131 | 615  | 23 | 30.03 | 5.24 | 51.47 |
| chr18 | 10610194 | 10611007 | 814  | 565  | 20 | 40.56 | 4.93 | 46.89 |
| chr18 | 10682234 | 10683118 | 885  | 264  | 19 | 31.81 | 5.34 | 49.78 |
| chr18 | 10817452 | 10818190 | 739  | 247  | 17 | 31.73 | 4.93 | 49.74 |
| chr18 | 10819800 | 10821209 | 1410 | 1075 | 36 | 49.11 | 4.79 | 50.77 |
| chr18 | 11076003 | 11076828 | 826  | 434  | 18 | 30.94 | 4.52 | 50.56 |
| chr18 | 11076941 | 11077776 | 836  | 240  | 18 | 30.38 | 3.7  | 51.65 |
| chr18 | 11474104 | 11474939 | 836  | 557  | 18 | 30.38 | 5.34 | 51.65 |
| chr18 | 11964088 | 11964895 | 808  | 194  | 18 | 31.97 | 4.11 | 49.79 |
| chr18 | 11979762 | 11981316 | 1555 | 499  | 39 | 69.57 | 6.57 | 54.47 |
| chr18 | 12038666 | 12039727 | 1062 | 661  | 22 | 30.6  | 5.75 | 51.21 |
| chr18 | 12635289 | 12636105 | 817  | 278  | 18 | 31.45 | 5.34 | 50    |
| chr18 | 13008140 | 13009565 | 1426 | 684  | 33 | 30.76 | 4.05 | 50.95 |
| chr18 | 13136876 | 13137956 | 1081 | 455  | 24 | 37.49 | 4.52 | 46.03 |
| chr18 | 13138514 | 13139323 | 810  | 269  | 18 | 31.85 | 4.52 | 49.8  |
| chr18 | 13501457 | 13502321 | 865  | 462  | 21 | 41.79 | 5.75 | 47    |
| chr18 | 13584882 | 13587229 | 2348 | 1178 | 52 | 32.29 | 3.65 | 50.07 |
| chr18 | 14034278 | 14035264 | 987  | 458  | 20 | 30.46 | 4.93 | 51.3  |
| chr18 | 14342849 | 14343751 | 903  | 532  | 21 | 39.34 | 5.75 | 46.61 |
| chr18 | 14490012 | 14491204 | 1193 | 638  | 30 | 42.95 | 5.82 | 47.42 |
| chr18 | 14719303 | 14720141 | 839  | 551  | 18 | 30.22 | 4.11 | 51.69 |
| chr18 | 15351816 | 15352596 | 781  | 522  | 18 | 33.58 | 5.34 | 48.63 |
| chr18 | 19170704 | 19171945 | 1242 | 952  | 30 | 49    | 4.64 | 50.65 |
| chr18 | 19377311 | 19378555 | 1245 | 711  | 28 | 35.37 | 5.35 | 47.51 |
| chr18 | 19445633 | 19446703 | 1071 | 553  | 23 | 34.01 | 6.16 | 48.53 |
| chr18 | 19498978 | 19499717 | 740  | 333  | 17 | 31.67 | 4.93 | 49.82 |
| chr18 | 20069556 | 20070635 | 1080 | 717  | 25 | 36.99 | 5.33 | 46.95 |
| chr18 | 20805549 | 20807160 | 1612 | 614  | 36 | 38.26 | 3.77 | 46.34 |
| chr18 | 22078061 | 22079096 | 1036 | 750  | 21 | 31.88 | 4.52 | 49.76 |
| chr18 | 22262980 | 22263799 | 820  | 285  | 18 | 30.38 | 5.24 | 51.64 |
| chr18 | 22274215 | 22275110 | 896  | 630  | 19 | 31.21 | 4.52 | 50.51 |
| chr18 | 22780430 | 22781225 | 796  | 514  | 19 | 37.12 | 6.16 | 46.93 |
| chr18 | 23206842 | 23207887 | 1046 | 424  | 21 | 31.38 | 6.16 | 50.17 |
| chr18 | 23341603 | 23342459 | 857  | 568  | 19 | 33.39 | 4.93 | 48.72 |
| chr18 | 23423288 | 23424079 | 792  | 422  | 18 | 30.19 | 5.42 | 51.69 |
| chr18 | 23582468 | 23583664 | 1197 | 570  | 29 | 42.48 | 4.33 | 47.29 |
| chr18 | 23625962 | 23626855 | 894  | 245  | 20 | 31.58 | 4.57 | 49.99 |
| chr18 | 23654881 | 23656270 | 1390 | 773  | 34 | 33.13 | 5.41 | 49.19 |

|       |          |          |      |      |    |       |      |       |
|-------|----------|----------|------|------|----|-------|------|-------|
| chr18 | 23846894 | 23848130 | 1237 | 745  | 29 | 38.76 | 6.71 | 46.01 |
| chr18 | 23995325 | 23996590 | 1266 | 667  | 26 | 31.92 | 6.16 | 49.84 |
| chr18 | 24134074 | 24135070 | 997  | 657  | 21 | 33.9  | 4.52 | 48.58 |
| chr18 | 25111345 | 25112475 | 1131 | 561  | 23 | 31.05 | 5.34 | 50.68 |
| chr18 | 25900061 | 25900776 | 716  | 459  | 17 | 32.93 | 6.13 | 49.36 |
| chr18 | 26244289 | 26245263 | 975  | 441  | 20 | 31.07 | 4.93 | 50.75 |
| chr18 | 26374348 | 26375170 | 823  | 541  | 18 | 31.11 | 4.93 | 50.68 |
| chr18 | 26602631 | 26604430 | 1800 | 447  | 34 | 37.01 | 4.93 | 46.96 |
| chr18 | 27086389 | 27088308 | 1920 | 503  | 35 | 45.66 | 5.34 | 49.78 |
| chr18 | 27198657 | 27199586 | 930  | 443  | 20 | 33.46 | 4.11 | 48.63 |
| chr18 | 27454239 | 27455311 | 1073 | 549  | 22 | 30.07 | 6.16 | 51.46 |
| chr18 | 27521418 | 27523164 | 1747 | 1471 | 41 | 66.38 | 5.34 | 54.32 |
| chr18 | 27885850 | 27886910 | 1061 | 262  | 24 | 38.59 | 5.34 | 46.11 |
| chr18 | 28010557 | 28011816 | 1260 | 745  | 29 | 48.22 | 6.98 | 49.61 |
| chr18 | 28357746 | 28358868 | 1123 | 660  | 25 | 34.66 | 5.71 | 47.75 |
| chr18 | 28535505 | 28537430 | 1926 | 1430 | 44 | 64.46 | 5.34 | 54.97 |
| chr18 | 28564753 | 28565994 | 1242 | 618  | 26 | 37.01 | 5.75 | 46.96 |
| chr18 | 28567909 | 28569296 | 1388 | 696  | 28 | 37.47 | 5.34 | 46.24 |
| chr18 | 28747421 | 28748162 | 742  | 280  | 17 | 30.17 | 4.78 | 51.66 |
| chr18 | 28754891 | 28755878 | 988  | 470  | 26 | 35.17 | 5.71 | 47.1  |
| chr18 | 28986561 | 28987571 | 1011 | 353  | 22 | 33.16 | 4.52 | 49.1  |
| chr18 | 29101668 | 29103182 | 1515 | 953  | 31 | 42.59 | 5.34 | 47.33 |
| chr18 | 29330012 | 29330691 | 680  | 271  | 17 | 35.55 | 5.75 | 47.21 |
| chr18 | 29603336 | 29604366 | 1031 | 337  | 25 | 44.69 | 6.16 | 48.77 |
| chr18 | 30071527 | 30072828 | 1302 | 582  | 27 | 37.86 | 6.16 | 46.75 |
| chr18 | 30304406 | 30305685 | 1280 | 520  | 29 | 43.97 | 5.12 | 47.86 |
| chr18 | 30523426 | 30524350 | 925  | 524  | 23 | 34.31 | 4.99 | 47.85 |
| chr18 | 30597453 | 30598827 | 1375 | 714  | 34 | 53.07 | 6.16 | 51.32 |
| chr18 | 30633681 | 30635429 | 1749 | 1342 | 33 | 35.75 | 5.34 | 47.07 |
| chr18 | 30749784 | 30750631 | 848  | 257  | 21 | 38.57 | 6.09 | 46.15 |
| chr18 | 30973051 | 30973959 | 909  | 540  | 20 | 34.64 | 4.11 | 47.61 |
| chr18 | 31202952 | 31203926 | 975  | 510  | 25 | 48.36 | 6.57 | 49.1  |
| chr18 | 31461875 | 31462861 | 987  | 387  | 29 | 61.21 | 5.71 | 55.43 |
| chr18 | 31519786 | 31520714 | 929  | 280  | 22 | 31.86 | 4.42 | 49.75 |
| chr18 | 31600752 | 31601714 | 963  | 514  | 21 | 30.01 | 3.68 | 51.48 |
| chr18 | 31613721 | 31615370 | 1650 | 628  | 32 | 33.71 | 4.14 | 48.59 |
| chr18 | 31950298 | 31951676 | 1379 | 360  | 32 | 54.02 | 5.75 | 52.85 |
| chr18 | 32034714 | 32035805 | 1092 | 620  | 23 | 32.94 | 5.34 | 49.38 |
| chr18 | 32118253 | 32119321 | 1069 | 472  | 21 | 30.26 | 4.93 | 51.61 |
| chr18 | 32608861 | 32610592 | 1732 | 649  | 43 | 38.51 | 4.68 | 46.35 |
| chr18 | 32678864 | 32680602 | 1739 | 596  | 34 | 39    | 4.89 | 46.14 |
| chr18 | 33144442 | 33146148 | 1707 | 1334 | 46 | 55.66 | 4.67 | 53.76 |
| chr18 | 34333092 | 34334377 | 1286 | 490  | 30 | 37.64 | 4.79 | 45.89 |
| chr18 | 34372371 | 34373201 | 831  | 483  | 20 | 39.42 | 6.98 | 47.03 |
| chr18 | 34466621 | 34467587 | 967  | 300  | 21 | 30.35 | 4.47 | 51.59 |
| chr18 | 34619980 | 34621288 | 1309 | 532  | 30 | 36.43 | 4.45 | 47.17 |
| chr18 | 34769184 | 34770200 | 1017 | 358  | 23 | 36.9  | 4.52 | 46.75 |
| chr18 | 36072543 | 36073295 | 753  | 481  | 17 | 30.89 | 4.93 | 50.71 |
| chr18 | 36587079 | 36587751 | 673  | 452  | 17 | 36.04 | 5.34 | 46.9  |
| chr18 | 37151080 | 37152235 | 1156 | 518  | 25 | 37.5  | 5.34 | 45.98 |
| chr18 | 37862763 | 37863505 | 743  | 503  | 17 | 31.49 | 4.52 | 49.89 |
| chr18 | 38086548 | 38087341 | 794  | 259  | 19 | 37.25 | 5.34 | 46.46 |

|       |          |          |      |      |    |       |      |       |
|-------|----------|----------|------|------|----|-------|------|-------|
| chr18 | 38265543 | 38266726 | 1184 | 641  | 24 | 32.27 | 5.34 | 50.08 |
| chr18 | 38292683 | 38293652 | 970  | 679  | 21 | 35.38 | 4.93 | 47.52 |
| chr18 | 38361448 | 38362496 | 1049 | 645  | 22 | 31.23 | 5.34 | 50.5  |
| chr18 | 38760393 | 38761457 | 1065 | 628  | 22 | 30.45 | 5.34 | 51.29 |
| chr18 | 38772284 | 38773613 | 1330 | 647  | 27 | 36.51 | 5.34 | 46.98 |
| chr18 | 38888501 | 38889210 | 710  | 421  | 17 | 33.55 | 4.11 | 48.54 |
| chr18 | 38926650 | 38927492 | 843  | 399  | 25 | 58.39 | 7.8  | 54.07 |
| chr18 | 38954426 | 38955748 | 1323 | 563  | 33 | 42.88 | 4.79 | 47.32 |
| chr18 | 38960390 | 38962304 | 1915 | 716  | 40 | 35.61 | 4.36 | 47.34 |
| chr18 | 38971325 | 38972734 | 1410 | 733  | 33 | 41.16 | 5.71 | 46.43 |
| chr18 | 39018006 | 39018828 | 823  | 340  | 18 | 31.11 | 5.75 | 50.68 |
| chr18 | 39332024 | 39332912 | 889  | 350  | 19 | 31.59 | 4.11 | 49.94 |
| chr18 | 39341789 | 39342829 | 1041 | 373  | 22 | 31.63 | 5.75 | 49.91 |
| chr18 | 39434218 | 39435094 | 877  | 666  | 19 | 32.26 | 4.11 | 49.99 |
| chr18 | 39561078 | 39562354 | 1277 | 578  | 29 | 42.52 | 5    | 47.2  |
| chr18 | 39564643 | 39566029 | 1387 | 906  | 33 | 53.54 | 4.93 | 52.11 |
| chr18 | 39798193 | 39799226 | 1034 | 611  | 28 | 58.61 | 6.57 | 53.69 |
| chr18 | 40378006 | 40379051 | 1046 | 581  | 21 | 31.38 | 4.52 | 50.17 |
| chr18 | 40466232 | 40467429 | 1198 | 592  | 26 | 39.28 | 4.11 | 46.48 |
| chr18 | 41200726 | 41201885 | 1160 | 542  | 31 | 64.01 | 6.16 | 54.31 |
| chr18 | 41287793 | 41288679 | 887  | 598  | 19 | 31.7  | 4.93 | 49.74 |
| chr18 | 41649212 | 41650277 | 1066 | 467  | 24 | 38.31 | 6.57 | 46.43 |
| chr18 | 41661939 | 41663411 | 1473 | 287  | 32 | 48.66 | 4.93 | 50.21 |
| chr18 | 41867423 | 41868331 | 909  | 280  | 20 | 34.64 | 5.34 | 47.61 |
| chr18 | 41889952 | 41890893 | 942  | 221  | 21 | 36.98 | 4.52 | 46.95 |
| chr18 | 43747448 | 43748400 | 953  | 277  | 21 | 36.34 | 5.75 | 47.04 |
| chr18 | 43830421 | 43831710 | 1290 | 1000 | 29 | 30.27 | 4.52 | 51.69 |
| chr18 | 44538005 | 44538801 | 797  | 507  | 23 | 51.69 | 5.75 | 51.23 |
| chr18 | 44538840 | 44539656 | 817  | 281  | 19 | 35.79 | 5.34 | 47.14 |
| chr18 | 44688846 | 44689825 | 980  | 745  | 25 | 30.95 | 3.74 | 50.52 |
| chr18 | 45135562 | 45136737 | 1176 | 699  | 25 | 36.47 | 5.75 | 47.15 |
| chr18 | 45385287 | 45387199 | 1913 | 1221 | 41 | 33.27 | 5.34 | 48.96 |
| chr18 | 45411431 | 45412189 | 759  | 279  | 23 | 32.92 | 5.14 | 49.32 |
| chr18 | 45462736 | 45464096 | 1361 | 756  | 34 | 37.19 | 4.98 | 46.85 |
| chr18 | 46825711 | 46826616 | 906  | 339  | 21 | 38.07 | 5.64 | 46.39 |
| chr18 | 48805443 | 48806424 | 982  | 558  | 21 | 34.71 | 6.57 | 47.7  |
| chr18 | 49326383 | 49327138 | 756  | 523  | 17 | 30.71 | 4.11 | 51.03 |
| chr18 | 49344899 | 49346076 | 1178 | 684  | 29 | 47.54 | 4.19 | 48.81 |
| chr18 | 49787730 | 49788624 | 895  | 535  | 19 | 31.27 | 5.75 | 50.46 |
| chr18 | 49820040 | 49820932 | 893  | 711  | 19 | 31.38 | 4.52 | 50.16 |
| chr18 | 51059528 | 51060553 | 1026 | 649  | 22 | 32.38 | 5.34 | 49.71 |
| chr18 | 51576756 | 51578180 | 1425 | 843  | 29 | 39.43 | 4.93 | 47.06 |
| chr18 | 51969909 | 51971376 | 1468 | 643  | 34 | 38.64 | 4.45 | 46.09 |
| chr18 | 52361547 | 52362485 | 939  | 265  | 21 | 37.16 | 4.93 | 46.85 |
| chr18 | 52408545 | 52409414 | 870  | 593  | 20 | 36.95 | 4.52 | 46.89 |
| chr18 | 52701257 | 52702356 | 1100 | 497  | 23 | 32.54 | 4.93 | 49.35 |
| chr18 | 52892883 | 52893794 | 912  | 259  | 20 | 34.47 | 4.93 | 47.74 |
| chr18 | 52900071 | 52901007 | 937  | 647  | 22 | 37.27 | 5.34 | 46.57 |
| chr18 | 53587932 | 53588850 | 919  | 360  | 23 | 42.83 | 6.16 | 47.28 |
| chr18 | 54167919 | 54169058 | 1140 | 703  | 24 | 30.15 | 4.95 | 51.64 |
| chr18 | 54304928 | 54307262 | 2335 | 708  | 63 | 36.31 | 3.65 | 46.99 |
| chr18 | 54449770 | 54451143 | 1374 | 611  | 31 | 30.16 | 3.74 | 51.64 |

|       |          |          |      |      |     |       |      |       |
|-------|----------|----------|------|------|-----|-------|------|-------|
| chr18 | 54649697 | 54650459 | 763  | 276  | 17  | 30.3  | 4.93 | 51.54 |
| chr18 | 54691166 | 54692569 | 1404 | 698  | 46  | 33.06 | 6.24 | 49.18 |
| chr18 | 55326618 | 55327654 | 1037 | 558  | 23  | 35.8  | 6.57 | 47.11 |
| chr18 | 55955813 | 55956565 | 753  | 286  | 17  | 30.89 | 4.93 | 50.71 |
| chr18 | 56163964 | 56164808 | 845  | 228  | 19  | 34.09 | 4.11 | 48.17 |
| chr18 | 56256189 | 56256914 | 726  | 475  | 18  | 37.14 | 6.16 | 46.9  |
| chr18 | 56665096 | 56667050 | 1955 | 541  | 41  | 40.24 | 4.89 | 46.67 |
| chr18 | 56783255 | 56784218 | 964  | 514  | 23  | 35.61 | 4.57 | 47.35 |
| chr18 | 57927807 | 57928411 | 605  | 289  | 15  | 31.2  | 5.75 | 50.53 |
| chr18 | 58023205 | 58024133 | 929  | 250  | 20  | 33.13 | 4.89 | 49.18 |
| chr18 | 59144582 | 59145448 | 867  | 547  | 20  | 32.02 | 4.09 | 49.79 |
| chr18 | 59609285 | 59610503 | 1219 | 636  | 26  | 33.49 | 5.33 | 48.69 |
| chr18 | 59785573 | 59786298 | 726  | 332  | 17  | 32.53 | 4.93 | 49.39 |
| chr18 | 59807510 | 59808221 | 712  | 275  | 18  | 37.14 | 5.64 | 46.93 |
| chr18 | 59975261 | 59976050 | 790  | 457  | 19  | 30.99 | 3.97 | 50.48 |
| chr18 | 60043205 | 60043632 | 428  | 214  | 15  | 52.18 | 5.41 | 51.29 |
| chr18 | 60227373 | 60228859 | 1487 | 768  | 36  | 33.83 | 4.76 | 48.73 |
| chr18 | 60695507 | 60696435 | 929  | 285  | 21  | 37.75 | 4.52 | 46.67 |
| chr18 | 60743273 | 60744178 | 906  | 674  | 21  | 31.52 | 4.28 | 49.89 |
| chr18 | 60982702 | 60985914 | 3213 | 1044 | 101 | 36.57 | 4.44 | 46.88 |
| chr18 | 61128980 | 61131576 | 2597 | 2141 | 54  | 48.79 | 4.28 | 50.69 |
| chr18 | 61133622 | 61134609 | 988  | 516  | 24  | 38.29 | 6.09 | 46.33 |
| chr18 | 61411293 | 61413646 | 2354 | 233  | 54  | 39.34 | 4.13 | 46.59 |
| chr18 | 61609161 | 61610746 | 1586 | 1021 | 33  | 32.76 | 4.28 | 49.4  |
| chr18 | 61670832 | 61671969 | 1138 | 555  | 30  | 57.28 | 6.3  | 53.47 |
| chr18 | 61682888 | 61685389 | 2502 | 1171 | 58  | 51.91 | 4.76 | 50.96 |
| chr18 | 61834142 | 61835449 | 1308 | 576  | 31  | 33.4  | 4.67 | 48.71 |
| chr18 | 61950498 | 61952785 | 2288 | 1791 | 52  | 41.48 | 5.12 | 47    |
| chr18 | 62253324 | 62254326 | 1003 | 291  | 24  | 31.55 | 6.53 | 50    |
| chr18 | 62381990 | 62384047 | 2058 | 862  | 56  | 75.32 | 4.65 | 60    |
| chr18 | 62407492 | 62408751 | 1260 | 713  | 27  | 30.55 | 4.24 | 51.3  |
| chr18 | 62408813 | 62410488 | 1676 | 265  | 32  | 35.18 | 3.57 | 47.11 |
| chr18 | 62527132 | 62528392 | 1261 | 643  | 32  | 54.18 | 6.4  | 53.4  |
| chr18 | 62566115 | 62567513 | 1399 | 702  | 35  | 33.94 | 5.56 | 48.67 |
| chr18 | 62657088 | 62658890 | 1803 | 1455 | 36  | 30.06 | 3.42 | 51.47 |
| chr18 | 62676031 | 62677044 | 1014 | 723  | 24  | 32.47 | 4.59 | 49.49 |
| chr18 | 62713308 | 62714804 | 1497 | 549  | 36  | 30.32 | 4.28 | 51.57 |
| chr18 | 62758726 | 62759869 | 1144 | 717  | 31  | 58.72 | 7.23 | 52.54 |
| chr18 | 63119416 | 63120858 | 1443 | 896  | 32  | 35.79 | 4.41 | 47.12 |
| chr18 | 63291372 | 63292350 | 979  | 480  | 21  | 33.22 | 5.97 | 49.14 |
| chr18 | 63370015 | 63371210 | 1196 | 559  | 28  | 47.73 | 6.57 | 49.2  |
| chr18 | 63373834 | 63374744 | 911  | 637  | 20  | 34.53 | 4.11 | 47.68 |
| chr18 | 63425110 | 63425983 | 874  | 259  | 20  | 30.54 | 5.1  | 51.21 |
| chr18 | 63499326 | 63500436 | 1111 | 690  | 33  | 60.36 | 6.42 | 55.23 |
| chr18 | 63540512 | 63542190 | 1679 | 375  | 36  | 43.36 | 4.19 | 47.87 |
| chr18 | 63551401 | 63552711 | 1311 | 884  | 37  | 59.65 | 6.51 | 55.44 |
| chr18 | 63771232 | 63772695 | 1464 | 928  | 32  | 39.93 | 4.74 | 46.7  |
| chr18 | 63959454 | 63960425 | 972  | 281  | 23  | 32.75 | 5.1  | 49.41 |
| chr18 | 64051286 | 64053575 | 2290 | 972  | 49  | 33.89 | 3.64 | 48.59 |
| chr18 | 64061460 | 64063117 | 1658 | 1088 | 40  | 47.03 | 4.65 | 47.48 |
| chr18 | 64230014 | 64231584 | 1571 | 981  | 40  | 45.97 | 4.98 | 49.69 |
| chr18 | 64243221 | 64244267 | 1047 | 484  | 25  | 31.48 | 4.7  | 49.92 |

|       |          |          |      |      |    |       |      |       |
|-------|----------|----------|------|------|----|-------|------|-------|
| chr18 | 64276636 | 64278057 | 1422 | 1166 | 34 | 45.85 | 5.46 | 50.12 |
| chr18 | 64285608 | 64288298 | 2691 | 1907 | 59 | 55.5  | 4.79 | 53.78 |
| chr18 | 64528310 | 64529810 | 1501 | 771  | 37 | 51.09 | 5.71 | 51.77 |
| chr18 | 64732766 | 64733819 | 1054 | 603  | 28 | 37.35 | 4.36 | 46.83 |
| chr18 | 64789826 | 64790679 | 854  | 289  | 24 | 30.21 | 4.28 | 51.73 |
| chr18 | 64810427 | 64811994 | 1568 | 334  | 36 | 41.21 | 4.15 | 46.78 |
| chr18 | 64825813 | 64826834 | 1022 | 586  | 23 | 36.2  | 6.52 | 46.93 |
| chr18 | 64839637 | 64841724 | 2088 | 636  | 46 | 36.23 | 5.6  | 46.98 |
| chr18 | 64860765 | 64862358 | 1594 | 801  | 36 | 35.42 | 4.57 | 47.52 |
| chr18 | 65051248 | 65052783 | 1536 | 865  | 39 | 37.25 | 4.57 | 46.43 |
| chr18 | 65063622 | 65065368 | 1747 | 1050 | 38 | 33.17 | 4.48 | 49.15 |
| chr18 | 65203237 | 65204797 | 1561 | 850  | 41 | 50.08 | 5.6  | 51.92 |
| chr18 | 65224940 | 65226517 | 1578 | 945  | 38 | 32.21 | 3.42 | 49.95 |
| chr18 | 65399726 | 65401207 | 1482 | 647  | 32 | 33.93 | 4.75 | 48.69 |
| chr18 | 65451329 | 65452743 | 1415 | 513  | 31 | 38.09 | 4.69 | 46.49 |
| chr18 | 65529018 | 65530244 | 1227 | 548  | 33 | 41.37 | 5.92 | 46.95 |
| chr18 | 65544580 | 65546857 | 2278 | 1639 | 55 | 32.85 | 4.94 | 49.33 |
| chr18 | 65641573 | 65644364 | 2792 | 611  | 63 | 51.51 | 5.66 | 51.65 |
| chr18 | 65944441 | 65945223 | 783  | 506  | 18 | 33.46 | 4.93 | 48.67 |
| chr18 | 65979871 | 65980743 | 873  | 279  | 20 | 32.78 | 4.19 | 49.41 |
| chr18 | 66037619 | 66038991 | 1373 | 742  | 27 | 34.05 | 4.89 | 48.5  |
| chr18 | 66336970 | 66338462 | 1493 | 713  | 36 | 34.83 | 4.85 | 47.52 |
| chr18 | 66388529 | 66391326 | 2798 | 277  | 69 | 30.71 | 3.27 | 51.02 |
| chr18 | 66473181 | 66474437 | 1257 | 746  | 29 | 31.88 | 4.52 | 49.84 |
| chr18 | 66578973 | 66580317 | 1345 | 607  | 32 | 37.36 | 6.14 | 46.79 |
| chr18 | 67049558 | 67051124 | 1567 | 637  | 36 | 34.6  | 3.49 | 47.71 |
| chr18 | 67100380 | 67101610 | 1231 | 685  | 27 | 30.13 | 4.11 | 51.64 |
| chr18 | 67160899 | 67161880 | 982  | 281  | 26 | 45.12 | 4.42 | 48.88 |
| chr18 | 67815481 | 67818306 | 2826 | 712  | 66 | 48.93 | 4.13 | 50.48 |
| chr18 | 67942324 | 67943924 | 1601 | 1093 | 32 | 33.56 | 3.64 | 48.58 |
| chr18 | 68004982 | 68005813 | 832  | 242  | 21 | 33.85 | 4.45 | 48.77 |
| chr18 | 68137840 | 68139952 | 2113 | 1532 | 45 | 37.28 | 5.59 | 46.67 |
| chr18 | 68391302 | 68392367 | 1066 | 524  | 27 | 41.73 | 5.35 | 47.28 |
| chr18 | 68489578 | 68492091 | 2514 | 1053 | 50 | 31.42 | 3.67 | 50.14 |
| chr18 | 68572477 | 68574175 | 1699 | 649  | 43 | 39.43 | 4.35 | 47.08 |
| chr18 | 68594475 | 68596772 | 2298 | 1246 | 49 | 30.24 | 3.21 | 51.74 |
| chr18 | 68821378 | 68823808 | 2431 | 866  | 61 | 34.65 | 3.91 | 47.64 |
| chr18 | 69028855 | 69030098 | 1244 | 513  | 29 | 42.03 | 4.09 | 47.02 |
| chr18 | 69048756 | 69050035 | 1280 | 793  | 35 | 53.4  | 5.82 | 51.55 |
| chr18 | 69370442 | 69371403 | 962  | 347  | 26 | 50.3  | 6.62 | 51.71 |
| chr18 | 69493712 | 69494999 | 1288 | 1002 | 33 | 31.75 | 4.57 | 49.77 |
| chr18 | 69510504 | 69512369 | 1866 | 618  | 44 | 33.02 | 4.28 | 49.13 |
| chr18 | 69535911 | 69538462 | 2552 | 1993 | 62 | 64.54 | 4.52 | 54.74 |
| chr18 | 69607386 | 69609924 | 2539 | 1147 | 63 | 63.56 | 4.98 | 54.59 |
| chr18 | 69784321 | 69785573 | 1253 | 571  | 32 | 34.2  | 3.74 | 47.91 |
| chr18 | 69812003 | 69813376 | 1374 | 794  | 32 | 49.91 | 5.84 | 51.69 |
| chr18 | 69893240 | 69893881 | 642  | 277  | 20 | 51.09 | 7    | 51.84 |
| chr18 | 69904388 | 69905839 | 1452 | 1184 | 31 | 39.31 | 5.27 | 46.55 |
| chr18 | 70044651 | 70045406 | 756  | 336  | 21 | 45.2  | 6.09 | 49.15 |
| chr18 | 70113489 | 70115139 | 1651 | 955  | 34 | 37.74 | 4.19 | 46.62 |
| chr18 | 70125612 | 70126518 | 907  | 471  | 19 | 30.63 | 4.52 | 51.2  |
| chr18 | 70191957 | 70192701 | 745  | 453  | 18 | 35.86 | 5.34 | 47    |



|       |          |          |      |      |    |       |      |       |
|-------|----------|----------|------|------|----|-------|------|-------|
| chr18 | 70270062 | 70271291 | 1230 | 625  | 24 | 30.17 | 4.93 | 51.65 |
| chr18 | 70355615 | 70356455 | 841  | 290  | 20 | 38.37 | 6.93 | 46.41 |
| chr18 | 70367807 | 70368782 | 976  | 269  | 22 | 35.04 | 4.52 | 47.48 |
| chr18 | 70385775 | 70386653 | 879  | 282  | 21 | 30.97 | 4.79 | 50.44 |
| chr18 | 70455647 | 70456731 | 1085 | 388  | 24 | 30.47 | 4.01 | 51.26 |
| chr18 | 70478747 | 70480440 | 1694 | 289  | 37 | 46.22 | 4.95 | 48.62 |
| chr18 | 70493110 | 70494072 | 963  | 691  | 25 | 44.16 | 5.33 | 48.09 |
| chr18 | 70541106 | 70542107 | 1002 | 648  | 21 | 33.63 | 4.11 | 48.79 |
| chr18 | 70553579 | 70555138 | 1560 | 955  | 31 | 31.13 | 3.08 | 50.62 |
| chr18 | 70588909 | 70589851 | 943  | 686  | 21 | 36.92 | 5.34 | 46.83 |
| chr18 | 70650771 | 70652572 | 1802 | 839  | 38 | 44.55 | 4.57 | 48.79 |
| chr18 | 70793198 | 70795255 | 2058 | 656  | 40 | 37.25 | 5.52 | 46.44 |
| chr18 | 70920549 | 70922086 | 1538 | 791  | 36 | 32.66 | 4.24 | 49.42 |
| chr18 | 70938690 | 70939672 | 983  | 426  | 25 | 42.14 | 4.89 | 46.95 |
| chr18 | 70974354 | 70975449 | 1096 | 805  | 30 | 47.04 | 4.99 | 47.56 |
| chr18 | 71045638 | 71047063 | 1426 | 740  | 31 | 41.42 | 5.33 | 47.11 |
| chr18 | 71419919 | 71420859 | 941  | 383  | 22 | 30.11 | 5.41 | 51.58 |
| chr18 | 71468098 | 71470429 | 2332 | 1016 | 47 | 31.76 | 3.19 | 49.87 |
| chr18 | 71646268 | 71647114 | 847  | 584  | 19 | 33.98 | 5.34 | 48.64 |
| chr18 | 71696862 | 71699207 | 2346 | 712  | 61 | 44.67 | 5.18 | 48.8  |
| chr18 | 71729538 | 71731683 | 2146 | 721  | 49 | 31.17 | 3.75 | 50.56 |
| chr18 | 71980067 | 71981838 | 1772 | 493  | 40 | 31.63 | 3.84 | 49.9  |
| chr18 | 72203783 | 72204818 | 1036 | 456  | 21 | 31.88 | 5.75 | 49.76 |
| chr18 | 72210539 | 72211881 | 1343 | 680  | 32 | 56.23 | 6.16 | 53.85 |
| chr18 | 72483034 | 72485598 | 2565 | 1442 | 65 | 45.13 | 4.51 | 48.91 |
| chr18 | 72592474 | 72593981 | 1508 | 504  | 34 | 40.47 | 4.69 | 46.96 |
| chr18 | 72875331 | 72876335 | 1005 | 602  | 21 | 33.48 | 4.93 | 48.6  |
| chr18 | 73316113 | 73317637 | 1525 | 727  | 37 | 33.71 | 5.85 | 48.61 |
| chr18 | 73407620 | 73408805 | 1186 | 708  | 25 | 31.51 | 4.19 | 49.88 |
| chr18 | 73541871 | 73543359 | 1489 | 973  | 31 | 34.55 | 4.33 | 47.76 |
| chr18 | 73727702 | 73729240 | 1539 | 1237 | 34 | 43.92 | 4.23 | 47.66 |
| chr18 | 73731400 | 73732429 | 1030 | 616  | 24 | 35.84 | 5.33 | 46.99 |
| chr18 | 74008511 | 74010002 | 1492 | 921  | 34 | 41.28 | 3.97 | 46.88 |
| chr18 | 74016050 | 74017679 | 1630 | 656  | 39 | 36.6  | 3.6  | 46.92 |
| chr18 | 74774066 | 74775352 | 1287 | 651  | 39 | 33.62 | 4.57 | 48.71 |
| chr18 | 74805194 | 74807282 | 2089 | 1521 | 42 | 31.25 | 4.52 | 50.5  |
| chr18 | 74946951 | 74948187 | 1237 | 659  | 30 | 39.65 | 5.43 | 46.47 |
| chr18 | 74956837 | 74958126 | 1290 | 620  | 30 | 36.74 | 5.43 | 46.96 |
| chr18 | 75025009 | 75026290 | 1282 | 924  | 35 | 37.27 | 3.93 | 46.58 |
| chr18 | 75262612 | 75263885 | 1274 | 800  | 34 | 42.15 | 4.36 | 46.99 |
| chr18 | 75383920 | 75385726 | 1807 | 554  | 36 | 37.58 | 4.95 | 45.82 |
| chr18 | 75574500 | 75576102 | 1603 | 260  | 36 | 53.74 | 4.93 | 52.24 |
| chr18 | 75994570 | 75995974 | 1405 | 915  | 35 | 59.05 | 4.41 | 52.5  |
| chr18 | 76016240 | 76017463 | 1224 | 450  | 27 | 32.28 | 5.3  | 50.02 |
| chr18 | 76218179 | 76219566 | 1388 | 842  | 33 | 51.9  | 5.24 | 50.96 |
| chr18 | 76251490 | 76252494 | 1005 | 250  | 21 | 33.48 | 4.11 | 48.6  |
| chr18 | 76916535 | 76920648 | 4114 | 3364 | 96 | 33.79 | 3.76 | 48.75 |
| chr18 | 77102028 | 77104027 | 2000 | 574  | 40 | 30.02 | 4.24 | 51.48 |
| chr18 | 77134477 | 77136157 | 1681 | 947  | 38 | 33.99 | 4.98 | 48.54 |
| chr18 | 77282710 | 77284475 | 1766 | 1018 | 50 | 34.36 | 3.65 | 47.86 |
| chr18 | 77452190 | 77453081 | 892  | 247  | 22 | 38.29 | 5.18 | 46.37 |
| chr18 | 77472440 | 77473391 | 952  | 563  | 20 | 32.27 | 5.34 | 50.07 |

|       |          |          |      |      |    |       |      |       |
|-------|----------|----------|------|------|----|-------|------|-------|
| chr18 | 77515954 | 77516776 | 823  | 540  | 18 | 31.11 | 5.34 | 50.68 |
| chr18 | 77619859 | 77620794 | 936  | 656  | 21 | 36.92 | 4.48 | 46.8  |
| chr18 | 77653175 | 77655714 | 2540 | 536  | 59 | 30.28 | 3.33 | 51.66 |
| chr18 | 77668023 | 77669181 | 1159 | 448  | 26 | 30.28 | 4.11 | 51.67 |
| chr18 | 77737976 | 77739251 | 1276 | 635  | 30 | 31.81 | 5.29 | 49.83 |
| chr18 | 77896163 | 77897179 | 1017 | 430  | 24 | 35.3  | 5.58 | 47.4  |
| chr19 | 110248   | 112282   | 2035 | 1451 | 47 | 34.47 | 4.03 | 47.77 |
| chr19 | 576928   | 577895   | 968  | 439  | 23 | 30.2  | 5.53 | 51.75 |
| chr19 | 632309   | 633509   | 1201 | 496  | 24 | 30.42 | 4.43 | 51.32 |
| chr19 | 892495   | 894615   | 2121 | 698  | 51 | 56.13 | 4.62 | 53.81 |
| chr19 | 1094640  | 1095852  | 1213 | 738  | 30 | 55.57 | 5.75 | 54.05 |
| chr19 | 1455237  | 1456496  | 1260 | 525  | 25 | 32.42 | 6.98 | 49.61 |
| chr19 | 2086529  | 2088087  | 1559 | 937  | 44 | 33.38 | 4.55 | 48.69 |
| chr19 | 2860899  | 2861564  | 666  | 352  | 18 | 37.62 | 6.09 | 45.84 |
| chr19 | 3665712  | 3666418  | 707  | 500  | 17 | 33.74 | 6.16 | 48.66 |
| chr19 | 4069702  | 4070534  | 833  | 615  | 19 | 34.81 | 6.98 | 47.51 |
| chr19 | 5053895  | 5054725  | 831  | 599  | 18 | 30.66 | 4.93 | 51.04 |
| chr19 | 5210277  | 5211044  | 768  | 427  | 18 | 34.38 | 5.75 | 47.81 |
| chr19 | 5545554  | 5546400  | 847  | 555  | 20 | 38.39 | 6.16 | 46.28 |
| chr19 | 5643305  | 5644119  | 815  | 500  | 20 | 35.77 | 4.14 | 47.15 |
| chr19 | 6255591  | 6256550  | 960  | 564  | 24 | 44.73 | 5.34 | 48.83 |
| chr19 | 6698569  | 6699746  | 1178 | 568  | 24 | 32.55 | 4.93 | 49.38 |
| chr19 | 6736456  | 6738103  | 1648 | 957  | 41 | 31.16 | 3.69 | 50.56 |
| chr19 | 6767262  | 6768805  | 1544 | 708  | 38 | 44.58 | 4.24 | 48.92 |
| chr19 | 6942233  | 6942883  | 651  | 363  | 19 | 47.56 | 6.12 | 48.99 |
| chr19 | 7063895  | 7064753  | 859  | 582  | 19 | 33.28 | 4.52 | 48.91 |
| chr19 | 7082793  | 7083853  | 1061 | 469  | 26 | 42.91 | 4.62 | 47.39 |
| chr19 | 7087493  | 7089117  | 1625 | 471  | 35 | 42.42 | 5.33 | 47.14 |
| chr19 | 7247068  | 7247920  | 853  | 282  | 23 | 42.72 | 6.09 | 47.48 |
| chr19 | 7739565  | 7740866  | 1302 | 784  | 29 | 41.95 | 6.23 | 47.1  |
| chr19 | 8325512  | 8326348  | 837  | 564  | 20 | 39.03 | 5.75 | 46.33 |
| chr19 | 8373021  | 8374144  | 1124 | 511  | 28 | 52.28 | 7.39 | 51.15 |
| chr19 | 9503749  | 9504818  | 1070 | 655  | 21 | 30.21 | 5.34 | 51.72 |
| chr19 | 9754621  | 9755600  | 980  | 647  | 21 | 30.8  | 3.81 | 51.01 |
| chr19 | 10205818 | 10207675 | 1858 | 1164 | 49 | 33.43 | 4.89 | 48.62 |
| chr19 | 10261885 | 10262713 | 829  | 285  | 20 | 39.15 | 5.3  | 46.29 |
| chr19 | 10602063 | 10602965 | 903  | 438  | 22 | 35.11 | 5.71 | 47.42 |
| chr19 | 11016866 | 11017781 | 916  | 227  | 20 | 30.37 | 4.57 | 51.62 |
| chr19 | 11336236 | 11337129 | 894  | 618  | 19 | 31.32 | 4.52 | 50.32 |
| chr19 | 11758658 | 11759529 | 872  | 279  | 19 | 32.54 | 4.93 | 49.4  |
| chr19 | 12432505 | 12434091 | 1587 | 469  | 35 | 50.58 | 4.52 | 51.57 |
| chr19 | 12521672 | 12522819 | 1148 | 537  | 23 | 30.26 | 4.93 | 51.68 |
| chr19 | 12603093 | 12603805 | 713  | 464  | 17 | 33.36 | 6.16 | 48.67 |
| chr19 | 12607721 | 12608695 | 975  | 269  | 20 | 31.07 | 4.11 | 50.75 |
| chr19 | 13827982 | 13828890 | 909  | 653  | 19 | 30.52 | 4.93 | 51.32 |
| chr19 | 14776135 | 14776799 | 665  | 219  | 17 | 36.6  | 5.75 | 46.93 |
| chr19 | 15397117 | 15398221 | 1105 | 552  | 31 | 33.5  | 4.21 | 48.66 |
| chr19 | 16215944 | 16216620 | 677  | 356  | 17 | 32.23 | 5.33 | 50.03 |
| chr19 | 17205588 | 17206466 | 879  | 268  | 19 | 32.14 | 5.34 | 49.88 |
| chr19 | 17391419 | 17393284 | 1866 | 1153 | 45 | 43.51 | 4.05 | 48.12 |
| chr19 | 17660859 | 17661942 | 1084 | 544  | 24 | 32.93 | 6.09 | 49.33 |
| chr19 | 18362592 | 18363561 | 970  | 366  | 20 | 31.32 | 4.93 | 50.27 |

|       |          |          |      |      |    |       |      |       |
|-------|----------|----------|------|------|----|-------|------|-------|
| chr19 | 19256322 | 19257868 | 1547 | 1257 | 32 | 35.2  | 4.33 | 47.17 |
| chr19 | 19826355 | 19827341 | 987  | 422  | 21 | 30.43 | 5.71 | 51.29 |
| chr19 | 19931353 | 19932676 | 1324 | 721  | 29 | 30.43 | 3.66 | 51.29 |
| chr19 | 20940578 | 20941419 | 842  | 439  | 18 | 30.05 | 5.75 | 51.39 |
| chr19 | 21219621 | 21220954 | 1334 | 709  | 37 | 42.17 | 5.14 | 47.06 |
| chr19 | 21235127 | 21236069 | 943  | 246  | 21 | 32.8  | 4.57 | 49.45 |
| chr19 | 21587075 | 21587944 | 870  | 270  | 20 | 31.84 | 4.84 | 49.75 |
| chr19 | 21999907 | 22000924 | 1018 | 431  | 24 | 41.09 | 4.52 | 46.3  |
| chr19 | 22401167 | 22401938 | 772  | 408  | 18 | 34.13 | 4.93 | 48.1  |
| chr19 | 22452060 | 22453295 | 1236 | 755  | 26 | 37.31 | 5.75 | 46.68 |
| chr19 | 22710239 | 22711366 | 1128 | 543  | 24 | 35.01 | 6.98 | 47.55 |
| chr19 | 23220323 | 23221143 | 821  | 315  | 18 | 31.22 | 4.52 | 50.51 |
| chr19 | 23234729 | 23235371 | 643  | 279  | 17 | 38.21 | 6.57 | 46.35 |
| chr19 | 23356513 | 23357632 | 1120 | 395  | 23 | 31.57 | 5.34 | 49.96 |
| chr19 | 23588144 | 23589741 | 1598 | 276  | 31 | 38.72 | 3.7  | 46.24 |
| chr19 | 24009415 | 24010975 | 1561 | 692  | 45 | 83.98 | 7.61 | 45.45 |
| chr19 | 24541890 | 24542989 | 1100 | 322  | 32 | 31.04 | 4.1  | 50.56 |
| chr19 | 27791829 | 27793429 | 1601 | 998  | 34 | 32.42 | 4.45 | 49.61 |
| chr19 | 27799081 | 27800255 | 1175 | 563  | 29 | 33.82 | 4.36 | 48.81 |
| chr19 | 30301813 | 30302628 | 816  | 538  | 20 | 39.37 | 4.03 | 46.82 |
| chr19 | 30405129 | 30405824 | 696  | 362  | 17 | 34.47 | 4.93 | 47.77 |
| chr19 | 30476865 | 30478013 | 1149 | 858  | 29 | 55.23 | 5.75 | 53.08 |
| chr19 | 31441219 | 31442121 | 903  | 236  | 19 | 30.84 | 5.34 | 50.85 |
| chr19 | 32082345 | 32083294 | 950  | 514  | 22 | 36.52 | 4.93 | 46.93 |
| chr19 | 32375766 | 32376696 | 931  | 318  | 20 | 33.4  | 6.57 | 48.71 |
| chr19 | 32842560 | 32843529 | 970  | 279  | 27 | 31.98 | 5.57 | 49.85 |
| chr19 | 33863134 | 33864342 | 1209 | 726  | 28 | 37.28 | 5.35 | 46.69 |
| chr19 | 34457460 | 34458110 | 651  | 376  | 17 | 36.14 | 5.18 | 46.97 |
| chr19 | 34503757 | 34505203 | 1447 | 670  | 33 | 50.09 | 4.93 | 51.86 |
| chr19 | 34746064 | 34746887 | 824  | 571  | 18 | 31.05 | 5.34 | 50.62 |
| chr19 | 34856314 | 34857675 | 1362 | 754  | 29 | 42.58 | 5.75 | 47.21 |
| chr19 | 34931774 | 34932698 | 925  | 643  | 21 | 33.82 | 6.09 | 48.79 |
| chr19 | 35105032 | 35106252 | 1221 | 767  | 25 | 34.24 | 5.75 | 47.92 |
| chr19 | 36126112 | 36127177 | 1066 | 669  | 23 | 34.26 | 4.93 | 47.89 |
| chr19 | 36543125 | 36544012 | 888  | 383  | 27 | 30.39 | 4.22 | 51.62 |
| chr19 | 36891984 | 36892933 | 950  | 674  | 23 | 34    | 4.37 | 48.55 |
| chr19 | 36936227 | 36937423 | 1197 | 581  | 27 | 41.34 | 5.58 | 46.9  |
| chr19 | 37042294 | 37043018 | 725  | 438  | 19 | 42.05 | 4.93 | 47.04 |
| chr19 | 37102452 | 37103134 | 683  | 416  | 16 | 30.73 | 4.52 | 50.98 |
| chr19 | 37301735 | 37302699 | 965  | 590  | 20 | 31.58 | 4.11 | 50    |
| chr19 | 37485263 | 37486165 | 903  | 301  | 19 | 30.84 | 4.52 | 50.85 |
| chr19 | 37942233 | 37943018 | 786  | 285  | 19 | 37.78 | 4.93 | 46.69 |
| chr19 | 37953343 | 37953976 | 634  | 282  | 20 | 48.57 | 5.16 | 49.54 |
| chr19 | 38230721 | 38231696 | 976  | 467  | 20 | 31.01 | 6.16 | 50.49 |
| chr19 | 38293378 | 38294287 | 910  | 623  | 20 | 34.58 | 5.34 | 47.72 |
| chr19 | 38492220 | 38493997 | 1778 | 483  | 41 | 38.49 | 4.36 | 46.41 |
| chr19 | 38511299 | 38511983 | 685  | 283  | 17 | 35.21 | 4.93 | 47.17 |
| chr19 | 38663138 | 38664108 | 971  | 270  | 21 | 35.32 | 4.93 | 47.45 |
| chr19 | 38996738 | 38997692 | 955  | 502  | 21 | 32.14 | 4.57 | 49.83 |
| chr19 | 39188784 | 39189464 | 681  | 405  | 17 | 35.48 | 5.34 | 47.41 |
| chr19 | 39923674 | 39924783 | 1110 | 381  | 25 | 31.02 | 4.94 | 50.52 |
| chr19 | 39925994 | 39927327 | 1334 | 539  | 36 | 38.8  | 5.71 | 46.1  |

|       |          |          |      |      |     |       |      |       |
|-------|----------|----------|------|------|-----|-------|------|-------|
| chr19 | 40042799 | 40043665 | 867  | 289  | 19  | 32.82 | 4.52 | 49.42 |
| chr19 | 40047659 | 40048681 | 1023 | 534  | 25  | 31.15 | 5.22 | 50.61 |
| chr19 | 40435363 | 40436262 | 900  | 263  | 19  | 31    | 4.11 | 50.47 |
| chr19 | 40541296 | 40542219 | 924  | 349  | 20  | 33.79 | 4.52 | 48.76 |
| chr19 | 41034299 | 41035935 | 1637 | 490  | 34  | 30.9  | 3.77 | 50.64 |
| chr19 | 41748541 | 41750114 | 1574 | 254  | 34  | 47.32 | 4.93 | 48.23 |
| chr19 | 41754150 | 41755004 | 855  | 527  | 19  | 33.51 | 5.34 | 48.65 |
| chr19 | 41756300 | 41757160 | 861  | 247  | 19  | 33.16 | 4.11 | 49.11 |
| chr19 | 41769346 | 41770821 | 1476 | 965  | 54  | 44.32 | 5.25 | 48.22 |
| chr19 | 41978083 | 41978654 | 572  | 286  | 15  | 32.66 | 6.16 | 49.32 |
| chr19 | 42281175 | 42282121 | 947  | 578  | 22  | 36.69 | 4.93 | 46.9  |
| chr19 | 42548725 | 42549329 | 605  | 275  | 16  | 36.06 | 5.34 | 47.01 |
| chr19 | 42794317 | 42796172 | 1856 | 522  | 41  | 36.45 | 3.81 | 47.14 |
| chr19 | 42962031 | 42962943 | 913  | 640  | 20  | 34.41 | 6.16 | 47.76 |
| chr19 | 43033626 | 43034664 | 1039 | 725  | 24  | 39.85 | 6.16 | 46.64 |
| chr19 | 43405107 | 43406069 | 963  | 280  | 20  | 31.69 | 4.52 | 49.8  |
| chr19 | 44021505 | 44022395 | 891  | 555  | 20  | 31.75 | 4.19 | 49.79 |
| chr19 | 44123243 | 44124460 | 1218 | 539  | 32  | 30.15 | 4.48 | 51.63 |
| chr19 | 44526168 | 44526989 | 822  | 595  | 18  | 31.16 | 4.93 | 50.58 |
| chr19 | 44597314 | 44598824 | 1511 | 949  | 33  | 33.97 | 3.46 | 48.63 |
| chr19 | 45223721 | 45224580 | 860  | 573  | 20  | 37.57 | 6.98 | 45.96 |
| chr19 | 45392552 | 45394715 | 2164 | 1404 | 53  | 44.45 | 4.85 | 48.51 |
| chr19 | 45506383 | 45507220 | 838  | 269  | 19  | 34.51 | 6.57 | 47.68 |
| chr19 | 45878114 | 45879079 | 966  | 706  | 26  | 41.42 | 5.14 | 47.08 |
| chr19 | 46497591 | 46498653 | 1063 | 531  | 23  | 34.42 | 4.93 | 47.8  |
| chr19 | 46527777 | 46528926 | 1150 | 654  | 29  | 55.16 | 6.16 | 53.15 |
| chr19 | 46889056 | 46889814 | 759  | 206  | 19  | 39.61 | 4.52 | 46.58 |
| chr19 | 46952523 | 46953192 | 670  | 364  | 18  | 41.19 | 6.16 | 46.62 |
| chr19 | 47024228 | 47025018 | 791  | 362  | 21  | 38.86 | 5.71 | 46.26 |
| chr19 | 47713674 | 47714750 | 1077 | 620  | 23  | 32.64 | 5.24 | 49.35 |
| chr19 | 47861019 | 47861686 | 668  | 288  | 18  | 41.34 | 6.57 | 46.9  |
| chr19 | 48067556 | 48068240 | 685  | 423  | 17  | 35.21 | 5.75 | 47.17 |
| chr19 | 48606069 | 48606885 | 817  | 527  | 21  | 34.83 | 5.48 | 47.54 |
| chr19 | 48930651 | 48931661 | 1011 | 613  | 21  | 32.77 | 4.48 | 49.4  |
| chr19 | 49117975 | 49118888 | 914  | 640  | 19  | 30.26 | 4.11 | 51.67 |
| chr19 | 49275520 | 49276385 | 866  | 604  | 20  | 31    | 5.46 | 50.53 |
| chr19 | 49738564 | 49739202 | 639  | 360  | 18  | 38.05 | 6.26 | 46.43 |
| chr19 | 49841344 | 49845664 | 4321 | 3265 | 137 | 45.38 | 3.31 | 49.53 |
| chr19 | 49850642 | 49853909 | 3268 | 2457 | 76  | 30.93 | 3.18 | 50.58 |
| chr19 | 50586363 | 50587645 | 1283 | 760  | 27  | 38.81 | 5.34 | 46.14 |
| chr19 | 51059164 | 51060477 | 1314 | 588  | 28  | 41.13 | 6.16 | 46.44 |
| chr19 | 51076814 | 51077882 | 1069 | 579  | 21  | 30.26 | 5.34 | 51.61 |
| chr19 | 51115289 | 51116760 | 1472 | 611  | 33  | 34.4  | 3.73 | 47.77 |
| chr19 | 51141304 | 51142160 | 857  | 331  | 21  | 42.33 | 5.34 | 47.17 |
| chr19 | 51219492 | 51220361 | 870  | 269  | 19  | 32.65 | 5.34 | 49.31 |
| chr19 | 52338552 | 52340145 | 1594 | 1304 | 34  | 35.6  | 4.99 | 47.28 |
| chr19 | 52456988 | 52458987 | 2000 | 1240 | 45  | 37.28 | 5.6  | 46.67 |
| chr19 | 52510882 | 52513190 | 2309 | 1593 | 64  | 32.86 | 3.42 | 49.3  |
| chr19 | 52977003 | 52978578 | 1576 | 281  | 37  | 49.6  | 3.68 | 51.23 |
| chr19 | 53256928 | 53258252 | 1325 | 616  | 28  | 35.52 | 6.09 | 47.29 |
| chr19 | 53569272 | 53570950 | 1679 | 1274 | 38  | 30.15 | 3.84 | 51.67 |
| chr19 | 53821284 | 53823275 | 1992 | 1367 | 48  | 48.53 | 4.76 | 49.64 |

|       |          |          |      |      |     |         |       |       |
|-------|----------|----------|------|------|-----|---------|-------|-------|
| chr19 | 54071537 | 54073016 | 1480 | 1000 | 31  | 31.53   | 4.11  | 49.9  |
| chr19 | 54769539 | 54770775 | 1237 | 416  | 32  | 40.77   | 4.98  | 46.47 |
| chr19 | 54922298 | 54923671 | 1374 | 567  | 44  | 94.39   | 11.42 | 31.03 |
| chr19 | 54976716 | 54978295 | 1580 | 279  | 35  | 32.31   | 3.88  | 50.08 |
| chr19 | 54990365 | 54991639 | 1275 | 483  | 31  | 45.74   | 5.77  | 49.89 |
| chr19 | 55048277 | 55049540 | 1264 | 793  | 26  | 30.09   | 5.21  | 51.54 |
| chr19 | 55170992 | 55172297 | 1306 | 721  | 31  | 39.44   | 5.09  | 47.08 |
| chr19 | 55812944 | 55813975 | 1032 | 650  | 34  | 44.35   | 4.41  | 48.43 |
| chr19 | 56228792 | 56229702 | 911  | 436  | 19  | 30.42   | 6.16  | 51.31 |
| chr19 | 56337227 | 56338739 | 1513 | 745  | 39  | 32.2    | 3.95  | 49.97 |
| chr19 | 56347930 | 56351524 | 3595 | 1410 | 81  | 31.62   | 3.42  | 49.89 |
| chr19 | 56405903 | 56407116 | 1214 | 566  | 28  | 46.66   | 6.16  | 47.41 |
| chr19 | 56426633 | 56428479 | 1847 | 368  | 41  | 31.16   | 4.72  | 50.59 |
| chr19 | 56502451 | 56503225 | 775  | 429  | 19  | 30.91   | 4.59  | 50.6  |
| chr19 | 56763888 | 56765380 | 1493 | 530  | 35  | 36.39   | 4.52  | 47.19 |
| chr19 | 56976326 | 56977313 | 988  | 736  | 22  | 34.39   | 4.52  | 47.77 |
| chr19 | 57046564 | 57047602 | 1039 | 749  | 24  | 30.01   | 4.84  | 51.47 |
| chr19 | 57086201 | 57087632 | 1432 | 697  | 36  | 56.97   | 6.47  | 52.74 |
| chr19 | 57114097 | 57115716 | 1620 | 1341 | 46  | 63.2    | 4.76  | 54.21 |
| chr19 | 57164238 | 57166073 | 1836 | 1570 | 40  | 57.26   | 5.34  | 53.2  |
| chr19 | 57508242 | 57509264 | 1023 | 744  | 24  | 40.79   | 4.93  | 46.36 |
| chr19 | 57665615 | 57666523 | 909  | 553  | 21  | 35.36   | 5     | 47.49 |
| chr19 | 57679287 | 57680799 | 1513 | 1066 | 34  | 32.46   | 3.89  | 49.45 |
| chr19 | 57737912 | 57738880 | 969  | 448  | 21  | 31.38   | 5.33  | 50.22 |
| chr19 | 57814371 | 57815824 | 1454 | 761  | 39  | 30.18   | 3.7   | 51.66 |
| chr19 | 57982275 | 57983932 | 1658 | 1019 | 36  | 38.44   | 4.59  | 46.39 |
| chr19 | 58032979 | 58034479 | 1501 | 916  | 36  | 30.13   | 4.57  | 51.66 |
| chr19 | 58229439 | 58230400 | 962  | 680  | 23  | 33.31   | 4.74  | 48.74 |
| chr19 | 58230902 | 58233291 | 2390 | 1719 | 59  | 74.79   | 5.3   | 58.23 |
| chr19 | 59005171 | 59005914 | 744  | 453  | 17  | 31.43   | 5.34  | 50.1  |
| chr2  | 272359   | 273147   | 789  | 284  | 20  | 42.29   | 4.93  | 47.36 |
| chr2  | 460412   | 461293   | 882  | 484  | 19  | 31.98   | 6.16  | 49.78 |
| chr2  | 786455   | 787057   | 603  | 283  | 19  | 47.36   | 6.4   | 48.44 |
| chr2  | 1172161  | 1172993  | 833  | 251  | 18  | 30.55   | 5.75  | 51.23 |
| chr2  | 1217433  | 1219081  | 1649 | 893  | 170 | 1031.81 | 41.49 | 0     |
| chr2  | 1704456  | 1705644  | 1189 | 510  | 28  | 48.15   | 7.8   | 49.46 |
| chr2  | 2298630  | 2299981  | 1352 | 829  | 63  | 185.34  | 15.75 | 15.38 |
| chr2  | 2958620  | 2959658  | 1039 | 347  | 22  | 31.73   | 4.52  | 49.74 |
| chr2  | 3738143  | 3739164  | 1022 | 370  | 21  | 32.59   | 6.57  | 49.35 |
| chr2  | 4283152  | 4284407  | 1256 | 523  | 29  | 48.46   | 6.16  | 49.39 |
| chr2  | 4374125  | 4374943  | 819  | 264  | 19  | 35.67   | 5.75  | 47.22 |
| chr2  | 4445214  | 4446083  | 870  | 258  | 19  | 32.65   | 5.75  | 49.31 |
| chr2  | 5359368  | 5360134  | 767  | 491  | 17  | 30.07   | 4.93  | 51.5  |
| chr2  | 5467472  | 5468285  | 814  | 565  | 19  | 35.98   | 6.98  | 47.1  |
| chr2  | 6385659  | 6386879  | 1221 | 661  | 29  | 50.57   | 7.39  | 51.51 |
| chr2  | 6495988  | 6497004  | 1017 | 424  | 26  | 36.9    | 5.71  | 46.76 |
| chr2  | 6539121  | 6540890  | 1770 | 1322 | 41  | 56.86   | 4.93  | 52.58 |
| chr2  | 6597336  | 6598183  | 848  | 646  | 19  | 30.19   | 4.19  | 51.72 |
| chr2  | 6832966  | 6834205  | 1240 | 625  | 25  | 33.34   | 4.93  | 48.7  |
| chr2  | 6994072  | 6995010  | 939  | 370  | 21  | 33.02   | 5.71  | 49.13 |
| chr2  | 7454451  | 7455804  | 1354 | 573  | 28  | 39.11   | 4.52  | 46.27 |
| chr2  | 7509683  | 7510509  | 827  | 284  | 19  | 35.17   | 5.34  | 47.09 |

|      |          |          |      |      |    |       |      |       |
|------|----------|----------|------|------|----|-------|------|-------|
| chr2 | 7676379  | 7677366  | 988  | 705  | 23 | 34.24 | 6.09 | 47.91 |
| chr2 | 7771751  | 7772754  | 1004 | 326  | 22 | 33.53 | 4.11 | 48.64 |
| chr2 | 8335820  | 8336660  | 841  | 256  | 18 | 30.11 | 5.34 | 51.58 |
| chr2 | 8351762  | 8353214  | 1453 | 238  | 34 | 32.54 | 3.74 | 49.39 |
| chr2 | 8390964  | 8391852  | 889  | 172  | 19 | 31.59 | 4.11 | 49.94 |
| chr2 | 8657003  | 8657765  | 763  | 502  | 17 | 30.3  | 5.75 | 51.54 |
| chr2 | 8887514  | 8888428  | 915  | 325  | 20 | 30.98 | 5    | 50.44 |
| chr2 | 11049580 | 11050566 | 987  | 577  | 24 | 43    | 6.16 | 47.41 |
| chr2 | 11170990 | 11171959 | 970  | 503  | 21 | 31.32 | 4.57 | 50.25 |
| chr2 | 11177403 | 11178062 | 660  | 289  | 18 | 41.97 | 6.98 | 47.12 |
| chr2 | 11271559 | 11272600 | 1042 | 689  | 24 | 39.23 | 4.48 | 46.48 |
| chr2 | 11631029 | 11631902 | 874  | 286  | 22 | 41.2  | 6.57 | 46.62 |
| chr2 | 11868634 | 11869499 | 866  | 278  | 19 | 32.88 | 5.34 | 49.29 |
| chr2 | 12127399 | 12128684 | 1286 | 741  | 26 | 30.36 | 4.95 | 51.66 |
| chr2 | 12182564 | 12184547 | 1984 | 1369 | 38 | 30.45 | 3.77 | 51.27 |
| chr2 | 12340141 | 12341015 | 875  | 630  | 19 | 32    | 5.3  | 49.77 |
| chr2 | 13043005 | 13043903 | 899  | 533  | 19 | 31.05 | 5.75 | 50.69 |
| chr2 | 13343072 | 13345383 | 2312 | 964  | 49 | 35.21 | 2.85 | 47.18 |
| chr2 | 13673719 | 13674642 | 924  | 266  | 21 | 38.05 | 4.52 | 46.4  |
| chr2 | 14056613 | 14057679 | 1067 | 415  | 21 | 30.35 | 5.34 | 51.61 |
| chr2 | 14093120 | 14093897 | 778  | 487  | 19 | 38.31 | 6.16 | 46.37 |
| chr2 | 14866396 | 14867209 | 814  | 397  | 20 | 40.56 | 4.93 | 46.89 |
| chr2 | 15166566 | 15167979 | 1414 | 902  | 31 | 47.82 | 4.52 | 49.43 |
| chr2 | 15174029 | 15174946 | 918  | 416  | 19 | 30.05 | 4.93 | 51.47 |
| chr2 | 16561329 | 16562231 | 903  | 266  | 23 | 43.9  | 6.16 | 47.85 |
| chr2 | 17027065 | 17028074 | 1010 | 428  | 27 | 55.47 | 6.57 | 53.55 |
| chr2 | 17341323 | 17342203 | 881  | 604  | 19 | 32.03 | 4.52 | 49.73 |
| chr2 | 17354279 | 17355416 | 1138 | 516  | 24 | 34.5  | 6.57 | 47.67 |
| chr2 | 17492806 | 17494038 | 1233 | 762  | 38 | 70.06 | 6.51 | 53.85 |
| chr2 | 17619279 | 17620474 | 1196 | 464  | 28 | 40.84 | 5.21 | 46.38 |
| chr2 | 17635205 | 17636336 | 1132 | 534  | 24 | 30.53 | 4.95 | 51.24 |
| chr2 | 17737252 | 17738076 | 825  | 270  | 18 | 30.99 | 5.34 | 50.47 |
| chr2 | 17963764 | 17964550 | 787  | 290  | 22 | 31.76 | 4.98 | 49.86 |
| chr2 | 18030322 | 18031188 | 867  | 278  | 19 | 32.45 | 4.08 | 49.46 |
| chr2 | 18106172 | 18107083 | 912  | 640  | 21 | 38.78 | 4.52 | 46.06 |
| chr2 | 18206430 | 18207279 | 850  | 363  | 19 | 33.8  | 5.34 | 48.83 |
| chr2 | 18616765 | 18617782 | 1018 | 727  | 26 | 50.12 | 6.57 | 51.8  |
| chr2 | 19537890 | 19538721 | 832  | 561  | 19 | 34.87 | 5.34 | 47.65 |
| chr2 | 20251422 | 20252988 | 1567 | 1088 | 48 | 44.47 | 5.03 | 48.41 |
| chr2 | 20853442 | 20854353 | 912  | 291  | 24 | 36.21 | 5.76 | 46.93 |
| chr2 | 21015960 | 21017001 | 1042 | 759  | 26 | 44.1  | 4.62 | 48.08 |
| chr2 | 21910018 | 21910955 | 938  | 453  | 20 | 33.02 | 4.52 | 49.11 |
| chr2 | 21960662 | 21961683 | 1022 | 588  | 21 | 32.59 | 4.52 | 49.35 |
| chr2 | 22138284 | 22138784 | 501  | 250  | 16 | 48.45 | 6.57 | 49.14 |
| chr2 | 22326606 | 22327371 | 766  | 224  | 17 | 30.13 | 4.93 | 51.65 |
| chr2 | 22669109 | 22670018 | 910  | 627  | 21 | 38.91 | 4.52 | 46.27 |
| chr2 | 22905947 | 22907100 | 1154 | 434  | 31 | 49.48 | 4.45 | 51.51 |
| chr2 | 23011383 | 23011908 | 526  | 263  | 15 | 42.93 | 6.16 | 47.38 |
| chr2 | 23085892 | 23086637 | 746  | 491  | 18 | 35.8  | 5.75 | 47.08 |
| chr2 | 23145234 | 23146044 | 811  | 532  | 18 | 31.79 | 5.34 | 49.76 |
| chr2 | 23419306 | 23420135 | 830  | 540  | 20 | 38.44 | 4.83 | 46.42 |
| chr2 | 24106932 | 24108614 | 1683 | 1067 | 37 | 31.02 | 4.98 | 50.5  |

|      |          |          |      |      |     |       |       |       |
|------|----------|----------|------|------|-----|-------|-------|-------|
| chr2 | 24455941 | 24457022 | 1082 | 604  | 30  | 35.86 | 3.93  | 46.98 |
| chr2 | 24479390 | 24480580 | 1191 | 482  | 30  | 57.04 | 10.27 | 52.75 |
| chr2 | 24635890 | 24636509 | 620  | 287  | 17  | 39.97 | 6.16  | 46.81 |
| chr2 | 24734725 | 24735522 | 798  | 290  | 18  | 32.55 | 4.93  | 49.31 |
| chr2 | 24840447 | 24841244 | 798  | 346  | 20  | 32.5  | 4.15  | 49.39 |
| chr2 | 25197820 | 25199153 | 1334 | 497  | 32  | 44.57 | 5.65  | 48.85 |
| chr2 | 25718235 | 25718957 | 723  | 409  | 17  | 32.72 | 5.34  | 49.39 |
| chr2 | 25850602 | 25851458 | 857  | 307  | 20  | 32.61 | 4.09  | 49.4  |
| chr2 | 25982763 | 25984734 | 1972 | 1478 | 44  | 39.64 | 4.57  | 46.55 |
| chr2 | 26244399 | 26245117 | 719  | 268  | 20  | 47.55 | 5.34  | 48.86 |
| chr2 | 26315012 | 26315676 | 665  | 290  | 16  | 31.88 | 4.93  | 49.82 |
| chr2 | 26359695 | 26360670 | 976  | 279  | 20  | 31.01 | 4.11  | 50.49 |
| chr2 | 26880096 | 26880869 | 774  | 361  | 20  | 43.37 | 6.98  | 47.9  |
| chr2 | 26979982 | 26980889 | 908  | 642  | 20  | 34.7  | 4.93  | 47.74 |
| chr2 | 27756499 | 27757338 | 840  | 421  | 19  | 34.39 | 4.52  | 47.73 |
| chr2 | 27768808 | 27769874 | 1067 | 528  | 23  | 30.09 | 4.95  | 51.55 |
| chr2 | 28973816 | 28975327 | 1512 | 715  | 39  | 38.52 | 5.99  | 46.25 |
| chr2 | 29445977 | 29449253 | 3277 | 2437 | 125 | 98.43 | 6.28  | 29.17 |
| chr2 | 29733578 | 29735232 | 1655 | 605  | 30  | 36.25 | 3.7   | 46.94 |
| chr2 | 30113332 | 30114494 | 1163 | 699  | 25  | 37.14 | 5.34  | 46.91 |
| chr2 | 30411204 | 30411976 | 773  | 288  | 19  | 34.72 | 5.33  | 47.68 |
| chr2 | 30435496 | 30436694 | 1199 | 392  | 25  | 35.31 | 5.34  | 47.42 |
| chr2 | 30461158 | 30462097 | 940  | 291  | 21  | 37.1  | 4.93  | 46.88 |
| chr2 | 30999953 | 31000847 | 895  | 353  | 19  | 31.27 | 4.93  | 50.46 |
| chr2 | 31064182 | 31064892 | 711  | 398  | 17  | 33.48 | 5.75  | 48.67 |
| chr2 | 31067180 | 31068119 | 940  | 337  | 20  | 32.91 | 5.75  | 49.24 |
| chr2 | 31394085 | 31395151 | 1067 | 400  | 25  | 42.49 | 6.98  | 47.34 |
| chr2 | 31529054 | 31530433 | 1380 | 797  | 30  | 45.62 | 6.16  | 50.15 |
| chr2 | 31904128 | 31904954 | 827  | 285  | 18  | 30.88 | 4.93  | 50.73 |
| chr2 | 32059721 | 32060958 | 1238 | 762  | 35  | 41.19 | 4.85  | 46.6  |
| chr2 | 32090862 | 32093037 | 2176 | 1521 | 50  | 48.74 | 5.87  | 50.42 |
| chr2 | 32192543 | 32193638 | 1096 | 533  | 28  | 54.16 | 6.16  | 53.1  |
| chr2 | 32204188 | 32204941 | 754  | 478  | 23  | 38.17 | 5.29  | 46.26 |
| chr2 | 32298860 | 32299817 | 958  | 364  | 21  | 36.06 | 5.75  | 46.97 |
| chr2 | 32908395 | 32909563 | 1169 | 451  | 26  | 36.03 | 5.33  | 46.95 |
| chr2 | 33306143 | 33308307 | 2165 | 1776 | 48  | 37.98 | 4.02  | 46.39 |
| chr2 | 33394430 | 33395361 | 932  | 280  | 22  | 35.24 | 6.69  | 47.32 |
| chr2 | 34628183 | 34629325 | 1143 | 590  | 25  | 36.31 | 6.37  | 47.02 |
| chr2 | 34759281 | 34760105 | 825  | 424  | 19  | 35.3  | 5.75  | 47.33 |
| chr2 | 35145211 | 35146476 | 1266 | 511  | 29  | 33.45 | 5.67  | 48.61 |
| chr2 | 35311940 | 35312914 | 975  | 693  | 20  | 31.07 | 4.11  | 50.75 |
| chr2 | 35908197 | 35909230 | 1034 | 541  | 23  | 35.97 | 4.52  | 47.03 |
| chr2 | 36082407 | 36083289 | 883  | 593  | 19  | 31.92 | 6.98  | 49.72 |
| chr2 | 36404550 | 36405997 | 1448 | 823  | 38  | 72.2  | 6.98  | 58.7  |
| chr2 | 36564371 | 36565443 | 1073 | 599  | 23  | 33.9  | 4.52  | 48.62 |
| chr2 | 36673354 | 36674011 | 658  | 395  | 16  | 32.34 | 5.34  | 49.93 |
| chr2 | 36741380 | 36742350 | 971  | 351  | 21  | 35.32 | 5.75  | 47.45 |
| chr2 | 36899226 | 36900973 | 1748 | 512  | 34  | 34.43 | 4.23  | 47.79 |
| chr2 | 37064279 | 37065095 | 817  | 525  | 18  | 31.45 | 4.52  | 50    |
| chr2 | 37201789 | 37202506 | 718  | 427  | 19  | 42.17 | 4.89  | 47.01 |
| chr2 | 37527413 | 37529287 | 1875 | 623  | 40  | 31.37 | 4.36  | 50.26 |
| chr2 | 38054386 | 38055295 | 910  | 381  | 21  | 38.91 | 5.34  | 46.27 |

|      |          |          |      |      |    |       |      |       |
|------|----------|----------|------|------|----|-------|------|-------|
| chr2 | 38303280 | 38304292 | 1013 | 473  | 21 | 33.06 | 5.34 | 49.12 |
| chr2 | 38370548 | 38372214 | 1667 | 1400 | 30 | 35.75 | 4.93 | 47.08 |
| chr2 | 38513300 | 38514072 | 773  | 316  | 19 | 38.65 | 5.34 | 46.14 |
| chr2 | 38701721 | 38702976 | 1256 | 666  | 25 | 32.6  | 6.16 | 49.42 |
| chr2 | 38795243 | 38796197 | 955  | 302  | 27 | 34.44 | 4.57 | 47.76 |
| chr2 | 38829064 | 38831051 | 1988 | 1309 | 57 | 37.68 | 3.86 | 46.41 |
| chr2 | 38917019 | 38918620 | 1602 | 1341 | 32 | 42.16 | 4.11 | 46.99 |
| chr2 | 39018498 | 39019845 | 1348 | 546  | 28 | 39.41 | 5.75 | 47.05 |
| chr2 | 39427596 | 39428714 | 1119 | 838  | 29 | 57.3  | 5.75 | 53.75 |
| chr2 | 39533157 | 39534326 | 1170 | 706  | 27 | 33.17 | 4.79 | 49.14 |
| chr2 | 39684960 | 39685936 | 977  | 428  | 22 | 34.99 | 4.93 | 47.61 |
| chr2 | 39917342 | 39918171 | 830  | 306  | 19 | 34.99 | 6.16 | 47.59 |
| chr2 | 40515462 | 40516434 | 973  | 718  | 24 | 39.87 | 4.62 | 46.68 |
| chr2 | 40854879 | 40856278 | 1400 | 653  | 29 | 40.65 | 5.34 | 46.66 |
| chr2 | 40882127 | 40883172 | 1046 | 560  | 27 | 44.43 | 5.1  | 48.45 |
| chr2 | 41059873 | 41060772 | 900  | 551  | 19 | 31    | 5.75 | 50.47 |
| chr2 | 41169189 | 41169950 | 762  | 482  | 17 | 30.36 | 4.11 | 51.65 |
| chr2 | 41354159 | 41354913 | 755  | 490  | 17 | 30.77 | 4.11 | 50.95 |
| chr2 | 41443441 | 41444255 | 815  | 285  | 19 | 35.92 | 5.34 | 47.05 |
| chr2 | 41634017 | 41635484 | 1468 | 723  | 34 | 53.05 | 8.22 | 51.16 |
| chr2 | 41705894 | 41707043 | 1150 | 420  | 23 | 30.17 | 5.75 | 51.66 |
| chr2 | 41862515 | 41863991 | 1477 | 598  | 30 | 35.38 | 4.19 | 47.6  |
| chr2 | 42552809 | 42553876 | 1068 | 523  | 23 | 30.04 | 6.09 | 51.45 |
| chr2 | 42563891 | 42564631 | 741  | 286  | 17 | 31.61 | 4.52 | 49.92 |
| chr2 | 42587595 | 42589239 | 1645 | 1021 | 42 | 49.18 | 4.69 | 50.72 |
| chr2 | 43029444 | 43030134 | 691  | 406  | 17 | 31.31 | 4.95 | 50.32 |
| chr2 | 43651103 | 43651969 | 867  | 599  | 22 | 31.68 | 4.45 | 49.82 |
| chr2 | 44218295 | 44219180 | 886  | 544  | 20 | 35.59 | 4.48 | 47.18 |
| chr2 | 44267347 | 44268260 | 914  | 633  | 21 | 38.66 | 6.57 | 46.08 |
| chr2 | 44625179 | 44626399 | 1221 | 742  | 32 | 49.13 | 7.53 | 50.77 |
| chr2 | 44659014 | 44659845 | 832  | 543  | 19 | 34.87 | 6.16 | 47.65 |
| chr2 | 45424891 | 45425934 | 1044 | 338  | 25 | 32.77 | 4.11 | 49.45 |
| chr2 | 45447977 | 45448788 | 812  | 374  | 22 | 45.5  | 6.57 | 49.85 |
| chr2 | 45484345 | 45485536 | 1192 | 523  | 27 | 43.7  | 5.34 | 47.84 |
| chr2 | 45496813 | 45497734 | 922  | 471  | 20 | 33.9  | 5.75 | 48.66 |
| chr2 | 45702541 | 45703483 | 943  | 676  | 23 | 31.05 | 4.45 | 50.6  |
| chr2 | 45710131 | 45711215 | 1085 | 265  | 25 | 41.43 | 4.93 | 47.1  |
| chr2 | 45907950 | 45910150 | 2201 | 288  | 53 | 33.41 | 3.11 | 48.72 |
| chr2 | 46108676 | 46110225 | 1550 | 1281 | 38 | 40.38 | 4.36 | 46.83 |
| chr2 | 46513906 | 46514812 | 907  | 399  | 20 | 34.75 | 4.93 | 47.62 |
| chr2 | 46665546 | 46666285 | 740  | 518  | 20 | 40.99 | 4.89 | 46.25 |
| chr2 | 46701639 | 46702676 | 1038 | 498  | 24 | 39.91 | 5.34 | 46.65 |
| chr2 | 47379261 | 47380806 | 1546 | 1315 | 35 | 43.77 | 4.79 | 47.74 |
| chr2 | 47474618 | 47475460 | 843  | 418  | 19 | 34.21 | 4.11 | 47.87 |
| chr2 | 47781027 | 47782410 | 1384 | 959  | 35 | 49.36 | 4.24 | 51.37 |
| chr2 | 47947472 | 47949330 | 1859 | 1183 | 47 | 31.76 | 4.07 | 49.87 |
| chr2 | 47998483 | 47999217 | 735  | 451  | 19 | 33.5  | 4.24 | 48.66 |
| chr2 | 49109657 | 49110725 | 1069 | 559  | 27 | 38.86 | 4.79 | 46.24 |
| chr2 | 49203870 | 49204694 | 825  | 495  | 24 | 54.62 | 5.75 | 54.11 |
| chr2 | 49816410 | 49817655 | 1246 | 542  | 26 | 36.81 | 5.75 | 46.81 |
| chr2 | 50376892 | 50377775 | 884  | 419  | 19 | 31.87 | 4.93 | 49.75 |
| chr2 | 50477117 | 50477992 | 876  | 650  | 19 | 32.31 | 5.34 | 50.09 |



|      |          |          |      |      |    |       |      |       |
|------|----------|----------|------|------|----|-------|------|-------|
| chr2 | 50612844 | 50613433 | 590  | 304  | 15 | 32.23 | 4.93 | 50.04 |
| chr2 | 51282198 | 51283066 | 869  | 606  | 19 | 32.71 | 4.11 | 49.41 |
| chr2 | 51592670 | 51593739 | 1070 | 795  | 24 | 38.09 | 5.34 | 46.44 |
| chr2 | 52066077 | 52066806 | 730  | 455  | 18 | 36.86 | 6.57 | 46.79 |
| chr2 | 52255428 | 52256333 | 906  | 377  | 19 | 30.68 | 5.34 | 51.01 |
| chr2 | 52283603 | 52285013 | 1411 | 805  | 28 | 36.4  | 7.39 | 47.18 |
| chr2 | 52805315 | 52806207 | 893  | 359  | 20 | 35.57 | 5.34 | 47.15 |
| chr2 | 53585226 | 53586070 | 845  | 521  | 21 | 43.15 | 4.93 | 47.34 |
| chr2 | 54092487 | 54094060 | 1574 | 547  | 33 | 30.54 | 4.45 | 51.22 |
| chr2 | 54278809 | 54279782 | 974  | 379  | 20 | 31.12 | 4.52 | 50.72 |
| chr2 | 54381363 | 54381954 | 592  | 322  | 15 | 32.09 | 5.75 | 49.72 |
| chr2 | 54744408 | 54745481 | 1074 | 580  | 25 | 35.36 | 5.52 | 47.51 |
| chr2 | 54874597 | 54875598 | 1002 | 287  | 24 | 42.06 | 4.93 | 47.01 |
| chr2 | 54958781 | 54960085 | 1305 | 687  | 30 | 35.96 | 4.07 | 47.03 |
| chr2 | 54965735 | 54967263 | 1529 | 286  | 31 | 31.39 | 3.18 | 50.21 |
| chr2 | 55092540 | 55094750 | 2211 | 1445 | 54 | 38.15 | 4.11 | 46.29 |
| chr2 | 55956721 | 55957577 | 857  | 279  | 22 | 42.33 | 4.93 | 47.17 |
| chr2 | 55970103 | 55971264 | 1162 | 279  | 28 | 44.35 | 4.95 | 48.4  |
| chr2 | 56076271 | 56077392 | 1122 | 490  | 29 | 57.09 | 7.8  | 53.02 |
| chr2 | 56621416 | 56622999 | 1584 | 1014 | 31 | 39.35 | 4.93 | 46.77 |
| chr2 | 57764504 | 57765541 | 1038 | 710  | 25 | 33.11 | 5.48 | 49.18 |
| chr2 | 58001797 | 58002791 | 995  | 555  | 24 | 37.87 | 5.33 | 46.73 |
| chr2 | 58006699 | 58007478 | 780  | 533  | 18 | 33.64 | 4.52 | 48.75 |
| chr2 | 58029440 | 58030295 | 856  | 287  | 20 | 37.82 | 4.93 | 46.66 |
| chr2 | 58054199 | 58054925 | 727  | 456  | 19 | 41.9  | 4.93 | 46.94 |
| chr2 | 58362142 | 58363706 | 1565 | 483  | 34 | 36.93 | 4.64 | 46.85 |
| chr2 | 58435503 | 58436648 | 1146 | 318  | 28 | 33.75 | 3.84 | 48.68 |
| chr2 | 58476439 | 58477824 | 1386 | 803  | 32 | 53.6  | 6.16 | 51.77 |
| chr2 | 58573053 | 58574548 | 1496 | 1292 | 31 | 37.97 | 4.57 | 46.38 |
| chr2 | 59478563 | 59479553 | 991  | 606  | 23 | 38.39 | 6.98 | 46.31 |
| chr2 | 59602150 | 59603073 | 924  | 289  | 20 | 33.79 | 4.93 | 48.76 |
| chr2 | 59875609 | 59876862 | 1254 | 743  | 28 | 38.39 | 4.89 | 46.36 |
| chr2 | 59933150 | 59935936 | 2787 | 1138 | 65 | 51.09 | 5.15 | 51.78 |
| chr2 | 60176040 | 60177569 | 1530 | 999  | 32 | 30.46 | 3.99 | 51.29 |
| chr2 | 60901057 | 60902297 | 1241 | 830  | 33 | 37.91 | 5.71 | 46.58 |
| chr2 | 61284168 | 61286953 | 2786 | 403  | 70 | 53.27 | 3.59 | 51.78 |
| chr2 | 61334244 | 61336545 | 2302 | 1534 | 59 | 67.9  | 7.11 | 54.29 |
| chr2 | 61944587 | 61945292 | 706  | 285  | 18 | 38.53 | 5.75 | 46.17 |
| chr2 | 61985295 | 61986914 | 1620 | 1182 | 36 | 47.23 | 6.16 | 48.07 |
| chr2 | 62183064 | 62184959 | 1896 | 1611 | 43 | 47.16 | 3.88 | 47.57 |
| chr2 | 62300567 | 62301289 | 723  | 285  | 17 | 30.3  | 5.06 | 51.66 |
| chr2 | 62474953 | 62475807 | 855  | 585  | 19 | 33.14 | 4.48 | 49.16 |
| chr2 | 62492251 | 62493790 | 1540 | 966  | 33 | 30.03 | 3.32 | 51.48 |
| chr2 | 62631895 | 62633095 | 1201 | 581  | 30 | 30.12 | 4.57 | 51.64 |
| chr2 | 62800981 | 62801997 | 1017 | 434  | 26 | 32.88 | 5.34 | 49.33 |
| chr2 | 62982058 | 62982839 | 782  | 500  | 23 | 33.62 | 5.06 | 48.7  |
| chr2 | 63150573 | 63152300 | 1728 | 1102 | 42 | 30.14 | 3.69 | 51.65 |
| chr2 | 63276387 | 63277959 | 1573 | 818  | 35 | 30.68 | 3.14 | 50.99 |
| chr2 | 63403660 | 63404647 | 988  | 256  | 26 | 30.43 | 3.81 | 51.29 |
| chr2 | 63510340 | 63513618 | 3279 | 670  | 84 | 77.2  | 5.02 | 54.29 |
| chr2 | 63517336 | 63518740 | 1405 | 904  | 39 | 35.57 | 3.58 | 47.14 |
| chr2 | 63543952 | 63545527 | 1576 | 586  | 34 | 34.94 | 4.19 | 47.69 |

|      |          |          |      |      |     |       |      |       |
|------|----------|----------|------|------|-----|-------|------|-------|
| chr2 | 63555029 | 63556025 | 997  | 534  | 26  | 45.56 | 6.4  | 50    |
| chr2 | 63832636 | 63833669 | 1034 | 753  | 32  | 41.1  | 6.27 | 46.36 |
| chr2 | 63876539 | 63878053 | 1515 | 1256 | 41  | 52.91 | 4.98 | 50.57 |
| chr2 | 64168672 | 64171069 | 2398 | 1072 | 59  | 31.47 | 3.42 | 49.98 |
| chr2 | 64833467 | 64835218 | 1752 | 641  | 51  | 51.24 | 5.22 | 51.25 |
| chr2 | 65043091 | 65044806 | 1716 | 1461 | 48  | 31.26 | 3.18 | 50.43 |
| chr2 | 65863109 | 65864396 | 1288 | 802  | 30  | 31.21 | 4.67 | 50.55 |
| chr2 | 65990581 | 65991638 | 1058 | 478  | 22  | 30.79 | 4.93 | 50.99 |
| chr2 | 66020694 | 66021748 | 1055 | 501  | 25  | 34.54 | 5.71 | 47.76 |
| chr2 | 66181354 | 66182284 | 931  | 491  | 20  | 33.02 | 6.12 | 49.14 |
| chr2 | 66376221 | 66377792 | 1572 | 1068 | 33  | 34.09 | 3.97 | 48.16 |
| chr2 | 66862002 | 66863469 | 1468 | 1204 | 30  | 32.22 | 3.97 | 50    |
| chr2 | 66867094 | 66868005 | 912  | 289  | 21  | 36.42 | 4.72 | 47.16 |
| chr2 | 66910666 | 66912674 | 2009 | 681  | 45  | 34.6  | 3.94 | 47.7  |
| chr2 | 67034486 | 67035676 | 1191 | 792  | 32  | 51.13 | 7.19 | 51.65 |
| chr2 | 67082286 | 67083654 | 1369 | 530  | 32  | 54.62 | 4.11 | 54.02 |
| chr2 | 67134475 | 67135747 | 1273 | 757  | 30  | 35.66 | 5.27 | 47.28 |
| chr2 | 67256156 | 67258321 | 2166 | 927  | 52  | 39.07 | 4.18 | 46.29 |
| chr2 | 67323700 | 67324730 | 1031 | 488  | 24  | 34.52 | 5.58 | 47.71 |
| chr2 | 67325210 | 67326980 | 1771 | 486  | 41  | 38.83 | 4.36 | 46.21 |
| chr2 | 67366796 | 67369513 | 2718 | 943  | 69  | 31.29 | 4.11 | 50.33 |
| chr2 | 67468699 | 67470436 | 1738 | 1174 | 39  | 35.8  | 3.81 | 47.13 |
| chr2 | 67556859 | 67557966 | 1108 | 835  | 30  | 44.1  | 5.49 | 48.05 |
| chr2 | 67613305 | 67615187 | 1883 | 1575 | 46  | 36.33 | 4.21 | 47.02 |
| chr2 | 67649296 | 67650958 | 1663 | 1104 | 42  | 31.34 | 3.09 | 50.21 |
| chr2 | 67659554 | 67661029 | 1476 | 651  | 35  | 34.52 | 5.29 | 47.73 |
| chr2 | 67667979 | 67670105 | 2127 | 759  | 52  | 35.52 | 3.69 | 47.25 |
| chr2 | 67973961 | 67976054 | 2094 | 574  | 47  | 43.25 | 4.57 | 47.75 |
| chr2 | 68332067 | 68332861 | 795  | 509  | 24  | 33.72 | 4.81 | 48.62 |
| chr2 | 68347441 | 68349616 | 2176 | 867  | 52  | 41.05 | 3.71 | 46.48 |
| chr2 | 68418158 | 68420849 | 2692 | 1151 | 72  | 41.18 | 3.49 | 46.54 |
| chr2 | 68925511 | 68928358 | 2848 | 2018 | 79  | 37.42 | 3.85 | 46.47 |
| chr2 | 69233605 | 69235001 | 1397 | 647  | 30  | 32.11 | 6.85 | 49.72 |
| chr2 | 69561366 | 69563533 | 2168 | 1429 | 51  | 34.12 | 4.35 | 48.06 |
| chr2 | 69728631 | 69729680 | 1050 | 623  | 21  | 31.18 | 4.93 | 50.55 |
| chr2 | 69980850 | 69982639 | 1790 | 1085 | 48  | 45.41 | 5.25 | 49.67 |
| chr2 | 70028359 | 70030238 | 1880 | 637  | 45  | 32.4  | 4.7  | 49.73 |
| chr2 | 70311120 | 70316787 | 5668 | 4819 | 172 | 31.71 | 3.1  | 49.73 |
| chr2 | 70343845 | 70345730 | 1886 | 1343 | 57  | 54.07 | 5.25 | 52.79 |
| chr2 | 70513279 | 70515052 | 1774 | 1000 | 45  | 30.23 | 4.57 | 51.71 |
| chr2 | 70532131 | 70533691 | 1561 | 775  | 46  | 31.41 | 5.05 | 50.17 |
| chr2 | 70598411 | 70600148 | 1738 | 1265 | 41  | 51.81 | 5.3  | 51.02 |
| chr2 | 70800742 | 70802487 | 1746 | 526  | 37  | 33.06 | 3.99 | 49.15 |
| chr2 | 70881835 | 70882643 | 809  | 447  | 18  | 31.01 | 5.24 | 50.48 |
| chr2 | 70968601 | 70969994 | 1394 | 862  | 34  | 46.59 | 5.05 | 47.67 |
| chr2 | 71212238 | 71213951 | 1714 | 959  | 49  | 83.02 | 6.78 | 50    |
| chr2 | 71337395 | 71339494 | 2100 | 1399 | 50  | 36.66 | 3.62 | 47    |
| chr2 | 71364121 | 71366020 | 1900 | 1345 | 49  | 32.11 | 4.68 | 49.71 |
| chr2 | 71372448 | 71374840 | 2393 | 742  | 56  | 40.45 | 4.89 | 46.9  |
| chr2 | 71412260 | 71413308 | 1049 | 725  | 21  | 30.24 | 4.83 | 51.74 |
| chr2 | 71464975 | 71465855 | 881  | 471  | 25  | 41.23 | 5.65 | 46.73 |
| chr2 | 71805732 | 71806468 | 737  | 282  | 18  | 36.39 | 5.34 | 47.16 |

|      |          |          |      |      |    |       |      |       |
|------|----------|----------|------|------|----|-------|------|-------|
| chr2 | 72299513 | 72301118 | 1606 | 555  | 39 | 40.72 | 4.05 | 46.53 |
| chr2 | 72680780 | 72682185 | 1406 | 547  | 32 | 31.7  | 3.74 | 49.76 |
| chr2 | 72936028 | 72937585 | 1558 | 1104 | 35 | 30.71 | 4.05 | 51.01 |
| chr2 | 73617556 | 73620595 | 3040 | 2246 | 77 | 45.16 | 3.78 | 49.01 |
| chr2 | 73991185 | 73992437 | 1253 | 576  | 31 | 35.7  | 4.01 | 47.22 |
| chr2 | 74698490 | 74700601 | 2112 | 1704 | 59 | 62.98 | 5.14 | 53.64 |
| chr2 | 74908169 | 74909083 | 915  | 640  | 22 | 32.66 | 5.16 | 49.42 |
| chr2 | 75331419 | 75332928 | 1510 | 884  | 37 | 32.57 | 4    | 49.32 |
| chr2 | 75413219 | 75414719 | 1501 | 1217 | 35 | 35.59 | 4.18 | 47.15 |
| chr2 | 75668291 | 75669504 | 1214 | 465  | 28 | 35.67 | 5.59 | 47.17 |
| chr2 | 75815516 | 75816700 | 1185 | 493  | 27 | 30.06 | 4.28 | 51.48 |
| chr2 | 76265717 | 76266647 | 931  | 362  | 25 | 32.84 | 5.2  | 49.38 |
| chr2 | 76786321 | 76787740 | 1420 | 553  | 31 | 33.61 | 3.39 | 48.69 |
| chr2 | 76932594 | 76933771 | 1178 | 415  | 30 | 57.92 | 5.75 | 53.41 |
| chr2 | 76972120 | 76974121 | 2002 | 506  | 41 | 41.79 | 4.74 | 46.98 |
| chr2 | 77008625 | 77011016 | 2392 | 943  | 57 | 54.09 | 4.44 | 52.99 |
| chr2 | 77028154 | 77029289 | 1136 | 291  | 30 | 35.97 | 4.43 | 47.07 |
| chr2 | 77279479 | 77281226 | 1748 | 1111 | 43 | 33.59 | 3.34 | 48.69 |
| chr2 | 77294889 | 77295904 | 1016 | 272  | 23 | 35.21 | 5.18 | 47.24 |
| chr2 | 77343899 | 77345229 | 1331 | 557  | 32 | 48.04 | 5.89 | 49.18 |
| chr2 | 77553106 | 77555023 | 1918 | 676  | 44 | 30.83 | 6.28 | 50.94 |
| chr2 | 77593349 | 77594330 | 982  | 346  | 24 | 32.56 | 4.11 | 49.35 |
| chr2 | 77695785 | 77696494 | 710  | 358  | 17 | 33.55 | 6.16 | 48.54 |
| chr2 | 77774912 | 77776371 | 1460 | 1150 | 33 | 33.61 | 4.32 | 48.7  |
| chr2 | 77918187 | 77919438 | 1252 | 575  | 34 | 53.71 | 4.94 | 52.05 |
| chr2 | 77951338 | 77952149 | 812  | 546  | 18 | 31.74 | 4.52 | 49.76 |
| chr2 | 78027150 | 78029171 | 2022 | 1446 | 44 | 42.66 | 5.53 | 47.33 |
| chr2 | 78065748 | 78066653 | 906  | 407  | 19 | 30.68 | 5.34 | 51.01 |
| chr2 | 78183925 | 78185013 | 1089 | 539  | 23 | 30.2  | 5.45 | 51.76 |
| chr2 | 78185100 | 78186834 | 1735 | 1085 | 40 | 37.49 | 3.74 | 46.02 |
| chr2 | 78208469 | 78209873 | 1405 | 788  | 31 | 30.51 | 5.12 | 51.3  |
| chr2 | 78247441 | 78248372 | 932  | 520  | 23 | 30.62 | 4.03 | 51.19 |
| chr2 | 78293504 | 78294714 | 1211 | 609  | 26 | 33.89 | 4.19 | 48.58 |
| chr2 | 78403374 | 78404364 | 991  | 356  | 21 | 33.82 | 6.93 | 48.78 |
| chr2 | 78404571 | 78405461 | 891  | 637  | 20 | 35.69 | 5.34 | 47.24 |
| chr2 | 78447717 | 78448493 | 777  | 290  | 19 | 33.37 | 4.09 | 48.73 |
| chr2 | 78467511 | 78468813 | 1303 | 693  | 26 | 32.24 | 5.18 | 50.05 |
| chr2 | 78548593 | 78549652 | 1060 | 366  | 26 | 35.57 | 6.16 | 47.19 |
| chr2 | 78663146 | 78664236 | 1091 | 509  | 28 | 41.42 | 5.48 | 47.07 |
| chr2 | 78919994 | 78922200 | 2207 | 1596 | 52 | 47.62 | 3.7  | 49.07 |
| chr2 | 79142152 | 79143916 | 1765 | 562  | 41 | 36.63 | 4.23 | 46.98 |
| chr2 | 79222877 | 79223920 | 1044 | 528  | 27 | 31.61 | 4.76 | 49.95 |
| chr2 | 79475574 | 79476819 | 1246 | 679  | 26 | 36.81 | 7.39 | 46.81 |
| chr2 | 79620688 | 79621910 | 1223 | 799  | 27 | 30.51 | 4.45 | 51.29 |
| chr2 | 79756904 | 79759070 | 2167 | 586  | 53 | 47.9  | 5.02 | 49.1  |
| chr2 | 79934462 | 79935333 | 872  | 453  | 21 | 35.23 | 5.16 | 47.22 |
| chr2 | 80086649 | 80088025 | 1377 | 753  | 33 | 42.94 | 4.99 | 47.45 |
| chr2 | 80186464 | 80187429 | 966  | 237  | 22 | 31.54 | 4.19 | 49.96 |
| chr2 | 80245934 | 80248616 | 2683 | 703  | 58 | 47.14 | 4.24 | 47.5  |
| chr2 | 80546095 | 80546862 | 768  | 363  | 24 | 44.26 | 6.52 | 48.16 |
| chr2 | 80977468 | 80978595 | 1128 | 547  | 27 | 36.06 | 4.84 | 47.03 |
| chr2 | 81049025 | 81050470 | 1446 | 727  | 38 | 54.7  | 5.48 | 54.25 |

|      |          |          |      |      |    |       |      |       |
|------|----------|----------|------|------|----|-------|------|-------|
| chr2 | 81097407 | 81098368 | 962  | 683  | 20 | 30.19 | 4.78 | 51.73 |
| chr2 | 81189785 | 81191005 | 1221 | 517  | 27 | 37.8  | 5.39 | 46.66 |
| chr2 | 81248356 | 81249468 | 1113 | 521  | 29 | 31.73 | 3.71 | 49.75 |
| chr2 | 81351146 | 81352278 | 1133 | 616  | 24 | 34.75 | 5.34 | 47.62 |
| chr2 | 81366634 | 81367620 | 987  | 431  | 21 | 31    | 5.39 | 50.5  |
| chr2 | 81417255 | 81418005 | 751  | 448  | 20 | 40.18 | 5.65 | 46.69 |
| chr2 | 81521328 | 81523303 | 1976 | 1328 | 46 | 41.29 | 4.05 | 46.88 |
| chr2 | 81635501 | 81636887 | 1387 | 555  | 31 | 35.9  | 5.48 | 46.96 |
| chr2 | 81652813 | 81653991 | 1179 | 646  | 24 | 31.43 | 5.24 | 50.02 |
| chr2 | 81792374 | 81793765 | 1392 | 654  | 31 | 35.65 | 4.79 | 47.27 |
| chr2 | 82574709 | 82576457 | 1749 | 1471 | 35 | 32.13 | 4.64 | 49.81 |
| chr2 | 82607351 | 82608415 | 1065 | 617  | 22 | 30.45 | 6.98 | 51.29 |
| chr2 | 82897416 | 82899191 | 1776 | 1299 | 35 | 39.95 | 6.45 | 46.69 |
| chr2 | 83013906 | 83014672 | 767  | 232  | 23 | 54.17 | 4.93 | 53.2  |
| chr2 | 83116627 | 83117981 | 1355 | 550  | 33 | 39.61 | 4.36 | 46.64 |
| chr2 | 83138715 | 83139839 | 1125 | 735  | 32 | 62.03 | 5.89 | 53.75 |
| chr2 | 83160567 | 83161788 | 1222 | 617  | 24 | 30.53 | 8.22 | 51.25 |
| chr2 | 83571479 | 83573395 | 1917 | 1363 | 37 | 31.96 | 5.53 | 49.78 |
| chr2 | 83646575 | 83647437 | 863  | 290  | 20 | 34.53 | 6.62 | 47.72 |
| chr2 | 83735709 | 83736914 | 1206 | 490  | 31 | 50.89 | 4.37 | 51.69 |
| chr2 | 84062491 | 84063529 | 1039 | 581  | 21 | 31.73 | 4.93 | 49.74 |
| chr2 | 84064896 | 84066427 | 1532 | 1031 | 31 | 41.77 | 5.34 | 47.08 |
| chr2 | 84141533 | 84143060 | 1528 | 764  | 31 | 41.96 | 6.16 | 47.07 |
| chr2 | 84309267 | 84310436 | 1170 | 508  | 29 | 53.82 | 8.22 | 52.45 |
| chr2 | 84310690 | 84312645 | 1956 | 462  | 40 | 66.89 | 5.34 | 56.08 |
| chr2 | 84459097 | 84460688 | 1592 | 1318 | 30 | 35.48 | 4.93 | 47.43 |
| chr2 | 84481084 | 84482791 | 1708 | 753  | 42 | 31.04 | 3.69 | 50.54 |
| chr2 | 84540888 | 84542396 | 1509 | 181  | 40 | 47.44 | 3.65 | 48.56 |
| chr2 | 84559863 | 84561760 | 1898 | 545  | 37 | 31.93 | 3.95 | 49.74 |
| chr2 | 84645768 | 84647757 | 1990 | 407  | 46 | 31.65 | 3.93 | 49.87 |
| chr2 | 84732537 | 84734163 | 1627 | 1075 | 38 | 35.11 | 3.98 | 47.43 |
| chr2 | 84991289 | 84993173 | 1885 | 502  | 49 | 46.63 | 4.57 | 47.26 |
| chr2 | 85084309 | 85085841 | 1533 | 591  | 32 | 42.27 | 3.94 | 47.29 |
| chr2 | 85090824 | 85091940 | 1117 | 270  | 25 | 32.45 | 4.37 | 49.55 |
| chr2 | 85536642 | 85537764 | 1123 | 508  | 26 | 33.92 | 4.59 | 48.72 |
| chr2 | 85746397 | 85748014 | 1618 | 361  | 34 | 37.44 | 3.26 | 46.37 |
| chr2 | 86166686 | 86168166 | 1481 | 881  | 30 | 32.82 | 4.54 | 49.42 |
| chr2 | 86168181 | 86169064 | 884  | 599  | 23 | 37.45 | 4.33 | 46.38 |
| chr2 | 86731548 | 86733135 | 1588 | 923  | 44 | 34.79 | 4.96 | 47.57 |
| chr2 | 87130341 | 87131608 | 1268 | 595  | 32 | 31.69 | 4.21 | 49.78 |
| chr2 | 87409798 | 87413165 | 3368 | 1251 | 74 | 94.73 | 6.15 | 29.63 |
| chr2 | 87872502 | 87874275 | 1774 | 291  | 37 | 31.27 | 3.95 | 50.45 |
| chr2 | 87943275 | 87944484 | 1210 | 752  | 28 | 46.89 | 6.57 | 47.64 |
| chr2 | 88372310 | 88373360 | 1051 | 500  | 23 | 32.71 | 5.51 | 49.36 |
| chr2 | 88906662 | 88907845 | 1184 | 402  | 28 | 35.98 | 4.79 | 47.07 |
| chr2 | 88957005 | 88957960 | 956  | 582  | 20 | 32.05 | 4.52 | 49.81 |
| chr2 | 88958419 | 88959431 | 1013 | 722  | 21 | 33.06 | 6.98 | 49.12 |
| chr2 | 89043926 | 89045438 | 1513 | 1012 | 37 | 39.05 | 3.74 | 46.28 |
| chr2 | 89157307 | 89159821 | 2515 | 656  | 69 | 39.79 | 3.65 | 46.64 |
| chr2 | 89952072 | 89952998 | 927  | 652  | 21 | 37.87 | 4.93 | 46.67 |
| chr2 | 90282788 | 90283599 | 812  | 522  | 18 | 31.74 | 5.34 | 49.76 |
| chr2 | 90514545 | 90516514 | 1970 | 688  | 61 | 58.75 | 4.89 | 52.71 |

|      |           |           |      |      |     |       |      |       |
|------|-----------|-----------|------|------|-----|-------|------|-------|
| chr2 | 91644565  | 91645721  | 1157 | 478  | 36  | 32.76 | 4.11 | 49.42 |
| chr2 | 91711495  | 91713658  | 2164 | 637  | 63  | 36.38 | 4.02 | 47.2  |
| chr2 | 91971515  | 91975474  | 3960 | 3366 | 134 | 48.41 | 4.01 | 49.14 |
| chr2 | 92024038  | 92025959  | 1922 | 537  | 48  | 68.73 | 7.73 | 56.69 |
| chr2 | 92095791  | 92097315  | 1525 | 1092 | 37  | 35.66 | 3.91 | 47.2  |
| chr2 | 95335685  | 95336824  | 1140 | 524  | 24  | 34.4  | 5.34 | 47.75 |
| chr2 | 95410140  | 95410691  | 552  | 276  | 15  | 37.66 | 6.16 | 46.06 |
| chr2 | 95688173  | 95689145  | 973  | 726  | 21  | 35.21 | 4.11 | 47.21 |
| chr2 | 95732883  | 95733647  | 765  | 490  | 17  | 30.19 | 5.34 | 51.7  |
| chr2 | 95851586  | 95852872  | 1287 | 741  | 27  | 38.61 | 4.93 | 46.12 |
| chr2 | 96229050  | 96230114  | 1065 | 473  | 22  | 30.45 | 5.34 | 51.29 |
| chr2 | 96431945  | 96432850  | 906  | 221  | 19  | 30.68 | 4.93 | 51.01 |
| chr2 | 96581057  | 96581808  | 752  | 442  | 20  | 40.71 | 6.09 | 46.52 |
| chr2 | 97826658  | 97828538  | 1881 | 1083 | 49  | 34.91 | 4.53 | 47.64 |
| chr2 | 98407903  | 98409271  | 1369 | 488  | 32  | 44.18 | 4.33 | 47.96 |
| chr2 | 98499180  | 98500326  | 1147 | 735  | 23  | 30.31 | 4.93 | 51.55 |
| chr2 | 98501214  | 98502330  | 1117 | 453  | 23  | 31.72 | 5.75 | 49.72 |
| chr2 | 98504981  | 98506375  | 1395 | 479  | 32  | 53.07 | 4.11 | 51.41 |
| chr2 | 98576944  | 98578614  | 1671 | 543  | 32  | 39.03 | 4.52 | 46.21 |
| chr2 | 98729085  | 98730504  | 1420 | 935  | 31  | 47.49 | 4.93 | 48.59 |
| chr2 | 99086191  | 99087118  | 928  | 649  | 20  | 33.57 | 5.75 | 48.57 |
| chr2 | 99505588  | 99506945  | 1358 | 626  | 29  | 39.03 | 5.06 | 46.35 |
| chr2 | 99640886  | 99641795  | 910  | 269  | 19  | 30.47 | 4.11 | 51.26 |
| chr2 | 100096923 | 100098284 | 1362 | 743  | 31  | 30.73 | 4.67 | 51.04 |
| chr2 | 100166225 | 100167207 | 983  | 715  | 21  | 34.66 | 6.98 | 47.66 |
| chr2 | 100472196 | 100473058 | 863  | 594  | 21  | 31.92 | 3.77 | 49.82 |
| chr2 | 100649914 | 100651498 | 1585 | 1017 | 35  | 50.68 | 6.16 | 51.59 |
| chr2 | 100818718 | 100819736 | 1019 | 389  | 21  | 32.74 | 5.34 | 49.36 |
| chr2 | 101414849 | 101415533 | 685  | 401  | 16  | 30.61 | 4.52 | 51.15 |
| chr2 | 101478239 | 101479141 | 903  | 264  | 19  | 30.84 | 4.52 | 50.85 |
| chr2 | 101934301 | 101934991 | 691  | 288  | 17  | 34.8  | 5.75 | 47.53 |
| chr2 | 102201078 | 102201918 | 841  | 216  | 18  | 30.11 | 4.52 | 51.58 |
| chr2 | 102313350 | 102314312 | 963  | 313  | 20  | 31.69 | 4.11 | 49.8  |
| chr2 | 102534487 | 102535295 | 809  | 252  | 20  | 40.9  | 4.93 | 46.35 |
| chr2 | 103148653 | 103149715 | 1063 | 590  | 22  | 30.55 | 4.52 | 51.18 |
| chr2 | 103365357 | 103367406 | 2050 | 429  | 43  | 43.63 | 5.48 | 47.66 |
| chr2 | 103777315 | 103778357 | 1043 | 355  | 23  | 35.48 | 4.52 | 47.45 |
| chr2 | 104132973 | 104133936 | 964  | 527  | 24  | 41.12 | 5.84 | 46.35 |
| chr2 | 104733353 | 104734477 | 1125 | 285  | 24  | 35.16 | 4.52 | 47.08 |
| chr2 | 104777394 | 104778211 | 818  | 543  | 18  | 31.39 | 5.75 | 50.18 |
| chr2 | 105444921 | 105446119 | 1199 | 565  | 25  | 35.31 | 6.16 | 47.42 |
| chr2 | 105674740 | 105675787 | 1048 | 519  | 21  | 30.29 | 4.43 | 51.68 |
| chr2 | 105696493 | 105697481 | 989  | 520  | 20  | 30.36 | 6.16 | 51.62 |
| chr2 | 105985371 | 105986779 | 1409 | 694  | 31  | 42.3  | 7.23 | 47.4  |
| chr2 | 106780175 | 106781880 | 1706 | 635  | 33  | 35.36 | 3.81 | 47.52 |
| chr2 | 107042216 | 107043286 | 1071 | 584  | 21  | 30.16 | 5.75 | 51.62 |
| chr2 | 107772706 | 107773467 | 762  | 367  | 18  | 34.76 | 6.16 | 47.61 |
| chr2 | 107952711 | 107953545 | 835  | 601  | 20  | 39.16 | 4.52 | 46.21 |
| chr2 | 108039035 | 108039863 | 829  | 389  | 20  | 36.65 | 4.67 | 46.97 |
| chr2 | 108495326 | 108496065 | 740  | 368  | 18  | 30.19 | 5.07 | 51.69 |
| chr2 | 108507144 | 108508125 | 982  | 476  | 20  | 30.71 | 5.34 | 51.01 |
| chr2 | 108568530 | 108570101 | 1572 | 1106 | 35  | 51.38 | 5.34 | 51.77 |

|      |           |           |      |      |    |       |      |       |
|------|-----------|-----------|------|------|----|-------|------|-------|
| chr2 | 108676888 | 108677647 | 760  | 445  | 17 | 30.48 | 3.7  | 51.27 |
| chr2 | 108768747 | 108769665 | 919  | 459  | 21 | 38.35 | 5.75 | 46.36 |
| chr2 | 109177167 | 109178070 | 904  | 632  | 19 | 30.79 | 4.52 | 50.91 |
| chr2 | 109309833 | 109310594 | 762  | 515  | 17 | 30.36 | 5.34 | 51.65 |
| chr2 | 109501575 | 109502132 | 558  | 279  | 16 | 34.17 | 5.48 | 48.01 |
| chr2 | 109869852 | 109870590 | 739  | 303  | 18 | 30.19 | 4.34 | 51.69 |
| chr2 | 111911369 | 111912303 | 935  | 657  | 20 | 33.18 | 5.34 | 49.11 |
| chr2 | 111935297 | 111936033 | 737  | 248  | 19 | 41.17 | 4.52 | 46.48 |
| chr2 | 112512948 | 112513812 | 865  | 578  | 22 | 31.8  | 5.14 | 49.83 |
| chr2 | 112537205 | 112538242 | 1038 | 290  | 27 | 42.13 | 6.99 | 46.88 |
| chr2 | 112547021 | 112547967 | 947  | 371  | 24 | 34.61 | 4.79 | 47.76 |
| chr2 | 112579226 | 112580509 | 1284 | 637  | 25 | 31.34 | 6.57 | 50.2  |
| chr2 | 112630022 | 112631863 | 1842 | 494  | 37 | 48.61 | 4.89 | 49.95 |
| chr2 | 112705007 | 112705510 | 504  | 252  | 15 | 42.93 | 6.16 | 47.38 |
| chr2 | 113020846 | 113022191 | 1346 | 576  | 30 | 33.24 | 5.04 | 48.99 |
| chr2 | 113072910 | 113073780 | 871  | 511  | 19 | 32.23 | 5.71 | 50.01 |
| chr2 | 113551129 | 113552501 | 1373 | 656  | 34 | 43.73 | 5.82 | 47.86 |
| chr2 | 114448252 | 114449223 | 972  | 247  | 22 | 31.22 | 4.19 | 50.58 |
| chr2 | 114465641 | 114467296 | 1656 | 262  | 30 | 32.39 | 4.08 | 49.75 |
| chr2 | 114472069 | 114473012 | 944  | 408  | 25 | 35.82 | 5.22 | 47.19 |
| chr2 | 115665929 | 115667055 | 1127 | 835  | 28 | 52.08 | 5.75 | 51.12 |
| chr2 | 116017355 | 116018422 | 1068 | 419  | 23 | 34.16 | 6.16 | 48.02 |
| chr2 | 116362678 | 116363582 | 905  | 650  | 19 | 30.38 | 5.3  | 51.64 |
| chr2 | 116828050 | 116828874 | 825  | 580  | 25 | 48.73 | 6.64 | 50.32 |
| chr2 | 117618386 | 117620219 | 1834 | 696  | 38 | 43.06 | 4.19 | 47.31 |
| chr2 | 117873426 | 117874573 | 1148 | 757  | 23 | 30.26 | 4.93 | 51.68 |
| chr2 | 117898100 | 117898959 | 860  | 290  | 19 | 33.22 | 5.34 | 49.11 |
| chr2 | 118727356 | 118728137 | 782  | 273  | 18 | 33.52 | 4.52 | 48.58 |
| chr2 | 118813107 | 118814698 | 1592 | 1143 | 39 | 30.95 | 4.63 | 50.52 |
| chr2 | 119118581 | 119119348 | 768  | 232  | 17 | 30.01 | 3.7  | 51.49 |
| chr2 | 119206629 | 119207579 | 951  | 673  | 22 | 33.54 | 4.67 | 48.65 |
| chr2 | 120567977 | 120569187 | 1211 | 577  | 25 | 34.72 | 5.75 | 47.7  |
| chr2 | 122892689 | 122893456 | 768  | 526  | 17 | 30.01 | 4.93 | 51.49 |
| chr2 | 123166881 | 123168138 | 1258 | 547  | 25 | 32.51 | 5.34 | 49.42 |
| chr2 | 123953408 | 123954348 | 941  | 380  | 28 | 66.06 | 6.57 | 55.49 |
| chr2 | 124054615 | 124055566 | 952  | 233  | 22 | 32.3  | 4.57 | 50.08 |
| chr2 | 124100049 | 124100769 | 721  | 449  | 17 | 32.85 | 4.11 | 49.39 |
| chr2 | 124430449 | 124431436 | 988  | 740  | 21 | 34.39 | 4.52 | 47.77 |
| chr2 | 124615286 | 124615975 | 690  | 402  | 16 | 30.3  | 4.52 | 51.62 |
| chr2 | 124626398 | 124627290 | 893  | 563  | 20 | 35.57 | 5.75 | 47.15 |
| chr2 | 125711969 | 125713030 | 1062 | 695  | 25 | 42.79 | 5.75 | 47.35 |
| chr2 | 126098764 | 126099767 | 1004 | 440  | 21 | 33.53 | 4.11 | 48.64 |
| chr2 | 126307053 | 126307920 | 868  | 479  | 19 | 32.76 | 4.11 | 49.36 |
| chr2 | 126598331 | 126599225 | 895  | 264  | 21 | 39.84 | 5.75 | 46.65 |
| chr2 | 126619454 | 126620500 | 1047 | 433  | 23 | 35.26 | 4.93 | 47.33 |
| chr2 | 126642754 | 126643788 | 1035 | 567  | 21 | 31.93 | 5.34 | 49.77 |
| chr2 | 126921669 | 126922538 | 870  | 595  | 19 | 32.65 | 4.93 | 49.31 |
| chr2 | 126994465 | 126995578 | 1114 | 504  | 25 | 39.78 | 6.16 | 46.6  |
| chr2 | 127065676 | 127067457 | 1782 | 572  | 34 | 37.75 | 4.11 | 46.66 |
| chr2 | 127500802 | 127501417 | 616  | 260  | 16 | 31.88 | 5.33 | 49.84 |
| chr2 | 128245904 | 128247231 | 1328 | 633  | 29 | 32.09 | 4.45 | 49.72 |
| chr2 | 128264651 | 128266047 | 1397 | 661  | 30 | 31.47 | 4.07 | 49.98 |

|      |           |           |      |      |    |       |      |       |
|------|-----------|-----------|------|------|----|-------|------|-------|
| chr2 | 128266085 | 128267428 | 1344 | 788  | 33 | 31.75 | 4.47 | 49.77 |
| chr2 | 129411719 | 129413569 | 1851 | 1183 | 35 | 45.2  | 4.52 | 49.08 |
| chr2 | 129456050 | 129457166 | 1117 | 550  | 23 | 31.72 | 5.34 | 49.72 |
| chr2 | 129492172 | 129493096 | 925  | 483  | 20 | 33.35 | 5.3  | 48.71 |
| chr2 | 129650346 | 129651241 | 896  | 264  | 20 | 35.39 | 4.93 | 47.63 |
| chr2 | 130288517 | 130289761 | 1245 | 683  | 25 | 33.1  | 5.34 | 49.16 |
| chr2 | 130341988 | 130342865 | 878  | 671  | 19 | 32.2  | 4.11 | 49.92 |
| chr2 | 130855573 | 130856493 | 921  | 466  | 27 | 37.79 | 4.35 | 46.68 |
| chr2 | 130938688 | 130940530 | 1843 | 1069 | 55 | 48.08 | 5.38 | 49.27 |
| chr2 | 130992724 | 130993856 | 1133 | 601  | 31 | 66.05 | 6.57 | 55.15 |
| chr2 | 131215806 | 131216970 | 1165 | 538  | 25 | 32.53 | 7.23 | 49.41 |
| chr2 | 131464252 | 131465058 | 807  | 504  | 19 | 36.42 | 4.52 | 47.16 |
| chr2 | 131814478 | 131815274 | 797  | 390  | 19 | 34.89 | 6.3  | 47.61 |
| chr2 | 132782287 | 132783591 | 1305 | 716  | 34 | 32.8  | 6.46 | 49.43 |
| chr2 | 133711977 | 133713144 | 1168 | 439  | 25 | 36.88 | 5.34 | 46.69 |
| chr2 | 134030354 | 134031539 | 1186 | 546  | 26 | 39.92 | 5.75 | 46.66 |
| chr2 | 134161586 | 134162543 | 958  | 534  | 22 | 36.06 | 4.52 | 46.97 |
| chr2 | 134741143 | 134742197 | 1055 | 633  | 21 | 30.94 | 4.93 | 50.6  |
| chr2 | 135122071 | 135123044 | 974  | 547  | 22 | 31.11 | 5.33 | 50.7  |
| chr2 | 136107748 | 136108856 | 1109 | 541  | 24 | 35.99 | 4.52 | 47.09 |
| chr2 | 136166822 | 136167632 | 811  | 352  | 22 | 39.85 | 6.33 | 46.61 |
| chr2 | 136381082 | 136382292 | 1211 | 654  | 27 | 34.86 | 5.1  | 47.64 |
| chr2 | 137304495 | 137305780 | 1286 | 634  | 29 | 41.24 | 5.33 | 46.79 |
| chr2 | 137531815 | 137532746 | 932  | 537  | 22 | 37.57 | 5.34 | 45.87 |
| chr2 | 138599436 | 138600330 | 895  | 460  | 19 | 31.27 | 5.34 | 50.46 |
| chr2 | 138765514 | 138766419 | 906  | 285  | 21 | 34.93 | 5.33 | 47.64 |
| chr2 | 138916754 | 138917361 | 608  | 317  | 15 | 31    | 5.75 | 50.54 |
| chr2 | 139367925 | 139368758 | 834  | 623  | 18 | 30.49 | 4.52 | 51.26 |
| chr2 | 139611756 | 139612998 | 1243 | 631  | 25 | 33.2  | 5.75 | 49.09 |
| chr2 | 140087601 | 140088709 | 1109 | 485  | 24 | 35.99 | 4.93 | 47.09 |
| chr2 | 140681365 | 140682527 | 1163 | 840  | 26 | 41.18 | 5.75 | 46.56 |
| chr2 | 140697709 | 140698719 | 1011 | 614  | 21 | 33.16 | 4.52 | 49.1  |
| chr2 | 140767561 | 140768351 | 791  | 253  | 18 | 32.97 | 5.34 | 49.28 |
| chr2 | 141097804 | 141098619 | 816  | 271  | 18 | 31.51 | 4.11 | 49.84 |
| chr2 | 141294105 | 141294960 | 856  | 374  | 27 | 68.15 | 8.63 | 53.68 |
| chr2 | 141386613 | 141387571 | 959  | 692  | 21 | 36    | 6.16 | 47.07 |
| chr2 | 142510935 | 142511996 | 1062 | 461  | 22 | 30.6  | 6.16 | 51.21 |
| chr2 | 142873458 | 142874323 | 866  | 660  | 19 | 32.88 | 4.93 | 49.29 |
| chr2 | 142921196 | 142922263 | 1068 | 453  | 24 | 38.2  | 6.57 | 46.45 |
| chr2 | 143714311 | 143715411 | 1101 | 582  | 25 | 40.04 | 5.3  | 46.59 |
| chr2 | 144093476 | 144094620 | 1145 | 644  | 25 | 33.53 | 4.57 | 48.63 |
| chr2 | 144105293 | 144106366 | 1074 | 430  | 24 | 32.22 | 4.47 | 49.99 |
| chr2 | 144117119 | 144118611 | 1493 | 946  | 31 | 43.68 | 4.93 | 47.93 |
| chr2 | 144400666 | 144401633 | 968  | 676  | 20 | 31.43 | 4.93 | 50.12 |
| chr2 | 144406186 | 144407414 | 1229 | 636  | 28 | 45.78 | 5.75 | 50    |
| chr2 | 144408234 | 144408983 | 750  | 289  | 17 | 31.07 | 4.93 | 50.77 |
| chr2 | 144721345 | 144722337 | 993  | 708  | 20 | 30.16 | 4.93 | 51.68 |
| chr2 | 144928640 | 144929576 | 937  | 468  | 21 | 33.73 | 5.39 | 48.65 |
| chr2 | 145209072 | 145210686 | 1615 | 1133 | 37 | 43.1  | 4.19 | 47.27 |
| chr2 | 145341356 | 145342261 | 906  | 289  | 19 | 30.68 | 5.34 | 51.01 |
| chr2 | 145344860 | 145345722 | 863  | 505  | 20 | 37.38 | 6.16 | 46.58 |
| chr2 | 145402233 | 145403496 | 1264 | 586  | 28 | 35.75 | 5.1  | 47.07 |

|      |           |           |      |      |    |       |      |       |
|------|-----------|-----------|------|------|----|-------|------|-------|
| chr2 | 145584894 | 145585887 | 994  | 721  | 21 | 33.04 | 6.04 | 49.12 |
| chr2 | 145914202 | 145915226 | 1025 | 547  | 22 | 31.43 | 4.83 | 50.07 |
| chr2 | 146243802 | 146244786 | 985  | 329  | 21 | 34.55 | 4.11 | 47.78 |
| chr2 | 146282292 | 146283132 | 841  | 500  | 21 | 43.43 | 6.98 | 47.96 |
| chr2 | 146320939 | 146322823 | 1885 | 589  | 41 | 33.71 | 5.6  | 48.59 |
| chr2 | 146387879 | 146388787 | 909  | 284  | 19 | 30.16 | 5.3  | 51.68 |
| chr2 | 146493580 | 146494511 | 932  | 267  | 20 | 31.77 | 3.98 | 49.86 |
| chr2 | 146555115 | 146556075 | 961  | 597  | 21 | 35.89 | 5.34 | 46.97 |
| chr2 | 146568304 | 146569455 | 1152 | 646  | 23 | 30.08 | 4.93 | 51.53 |
| chr2 | 146627090 | 146628675 | 1586 | 279  | 31 | 42.91 | 4.52 | 47.39 |
| chr2 | 146726899 | 146727723 | 825  | 434  | 18 | 30.99 | 5.34 | 50.47 |
| chr2 | 147051967 | 147052896 | 930  | 479  | 20 | 33.46 | 4.52 | 48.63 |
| chr2 | 147202203 | 147203166 | 964  | 366  | 21 | 35.72 | 5.75 | 47.25 |
| chr2 | 147228867 | 147229699 | 833  | 281  | 19 | 34.81 | 5.75 | 47.51 |
| chr2 | 147395389 | 147396027 | 639  | 349  | 16 | 30.32 | 4.95 | 51.57 |
| chr2 | 147489097 | 147490257 | 1161 | 700  | 26 | 41.29 | 6.16 | 46.86 |
| chr2 | 147509073 | 147509874 | 802  | 397  | 21 | 30.78 | 5.29 | 50.98 |
| chr2 | 147613270 | 147614095 | 826  | 565  | 18 | 30.94 | 4.11 | 50.56 |
| chr2 | 148182290 | 148183091 | 802  | 547  | 18 | 32.32 | 3.7  | 50.01 |
| chr2 | 148269181 | 148270198 | 1018 | 449  | 21 | 32.8  | 5.34 | 49.43 |
| chr2 | 148627973 | 148628702 | 730  | 451  | 17 | 32.28 | 4.93 | 50.02 |
| chr2 | 148954439 | 148955248 | 810  | 341  | 19 | 36.23 | 5.34 | 46.97 |
| chr2 | 149378651 | 149379605 | 955  | 710  | 22 | 30.99 | 4.84 | 50.51 |
| chr2 | 149885101 | 149885898 | 798  | 520  | 20 | 36.31 | 5.58 | 47.01 |
| chr2 | 150332697 | 150333761 | 1065 | 286  | 21 | 30.45 | 4.52 | 51.29 |
| chr2 | 150487297 | 150488276 | 980  | 584  | 23 | 39.04 | 5.34 | 46.26 |
| chr2 | 151161973 | 151163031 | 1059 | 582  | 23 | 34.63 | 4.93 | 47.79 |
| chr2 | 151163414 | 151164082 | 669  | 366  | 16 | 31.62 | 5.34 | 49.88 |
| chr2 | 152222121 | 152223143 | 1023 | 425  | 24 | 40.79 | 6.16 | 46.36 |
| chr2 | 152538258 | 152539229 | 972  | 287  | 22 | 35.27 | 4.52 | 47.3  |
| chr2 | 152587784 | 152588493 | 710  | 444  | 18 | 38.25 | 5.34 | 46.33 |
| chr2 | 152622247 | 152623937 | 1691 | 997  | 37 | 53.02 | 7.39 | 50.99 |
| chr2 | 153539634 | 153540902 | 1269 | 893  | 31 | 31.32 | 4.1  | 50.32 |
| chr2 | 153688492 | 153689310 | 819  | 541  | 19 | 31.86 | 4.19 | 49.73 |
| chr2 | 153962888 | 153963712 | 825  | 291  | 18 | 30.99 | 5.34 | 50.47 |
| chr2 | 154113577 | 154114554 | 978  | 461  | 20 | 30.91 | 5.34 | 50.61 |
| chr2 | 154429423 | 154430400 | 978  | 628  | 24 | 43.57 | 6.57 | 47.99 |
| chr2 | 154695301 | 154696844 | 1544 | 1157 | 35 | 52.91 | 6.16 | 50.49 |
| chr2 | 154825132 | 154826592 | 1461 | 231  | 30 | 41.45 | 3.29 | 47.01 |
| chr2 | 155038732 | 155040304 | 1573 | 663  | 33 | 35.53 | 4.79 | 47.24 |
| chr2 | 155174652 | 155175700 | 1049 | 766  | 23 | 35.16 | 4.93 | 47.15 |
| chr2 | 155316835 | 155317659 | 825  | 247  | 19 | 35.3  | 5.75 | 47.33 |
| chr2 | 155433033 | 155434203 | 1171 | 755  | 31 | 63.2  | 11.5 | 54.46 |
| chr2 | 155997785 | 155998577 | 793  | 448  | 18 | 32.85 | 4.93 | 49.28 |
| chr2 | 156075172 | 156076348 | 1177 | 896  | 31 | 56.36 | 5.71 | 54.03 |
| chr2 | 156232501 | 156233335 | 835  | 471  | 22 | 43.85 | 4.93 | 47.92 |
| chr2 | 156413439 | 156414679 | 1241 | 698  | 30 | 53.76 | 6.57 | 52.33 |
| chr2 | 156768976 | 156769861 | 886  | 290  | 20 | 35.98 | 4.52 | 47.04 |
| chr2 | 156957361 | 156958424 | 1064 | 630  | 24 | 38.43 | 6.16 | 46.35 |
| chr2 | 157969725 | 157971013 | 1289 | 570  | 26 | 34.73 | 6.16 | 47.63 |
| chr2 | 158177902 | 158178910 | 1009 | 384  | 22 | 33.26 | 4.93 | 48.94 |
| chr2 | 158242832 | 158243751 | 920  | 481  | 20 | 34.02 | 5.75 | 48.52 |



|      |           |           |      |      |    |       |      |       |
|------|-----------|-----------|------|------|----|-------|------|-------|
| chr2 | 158243844 | 158245247 | 1404 | 812  | 28 | 31.88 | 5.71 | 49.8  |
| chr2 | 158279975 | 158282074 | 2100 | 480  | 44 | 35.08 | 4.94 | 47.37 |
| chr2 | 158282663 | 158284246 | 1584 | 1110 | 32 | 32.85 | 4.28 | 49.32 |
| chr2 | 158299640 | 158301679 | 2040 | 832  | 53 | 42.28 | 3.95 | 47.33 |
| chr2 | 158343241 | 158344143 | 903  | 627  | 19 | 30.84 | 4.93 | 50.85 |
| chr2 | 158393467 | 158394165 | 699  | 466  | 18 | 39.03 | 4.52 | 46.3  |
| chr2 | 158463223 | 158464178 | 956  | 593  | 26 | 54.55 | 5.34 | 54.56 |
| chr2 | 159059117 | 159059881 | 765  | 277  | 18 | 30.95 | 6.09 | 50.52 |
| chr2 | 159916901 | 159917726 | 826  | 287  | 19 | 35.24 | 5.34 | 47.26 |
| chr2 | 160627383 | 160628362 | 980  | 502  | 23 | 30.62 | 4.94 | 51.2  |
| chr2 | 160824659 | 160825696 | 1038 | 570  | 23 | 35.75 | 5.75 | 47.04 |
| chr2 | 161406706 | 161407738 | 1033 | 533  | 24 | 40.2  | 4.93 | 46.69 |
| chr2 | 161890461 | 161891948 | 1488 | 857  | 35 | 53.42 | 5.58 | 51.81 |
| chr2 | 161902839 | 161904099 | 1261 | 490  | 32 | 61.61 | 4.93 | 53.44 |
| chr2 | 162113420 | 162114973 | 1554 | 1285 | 37 | 60.76 | 4.11 | 55.02 |
| chr2 | 162294552 | 162295648 | 1097 | 355  | 24 | 32.26 | 5.71 | 50.06 |
| chr2 | 162445502 | 162446342 | 841  | 401  | 18 | 30.11 | 5.75 | 51.58 |
| chr2 | 162463249 | 162464411 | 1163 | 552  | 27 | 44.07 | 7.25 | 48.02 |
| chr2 | 162556165 | 162556948 | 784  | 500  | 18 | 33.39 | 5.75 | 48.71 |
| chr2 | 162955828 | 162956745 | 918  | 493  | 21 | 38.41 | 4.93 | 46.39 |
| chr2 | 163157667 | 163158656 | 990  | 337  | 20 | 30.31 | 4.11 | 51.56 |
| chr2 | 163202244 | 163203098 | 855  | 428  | 20 | 33.85 | 5.33 | 48.75 |
| chr2 | 163497310 | 163498906 | 1597 | 1022 | 34 | 46.15 | 6.57 | 49.06 |
| chr2 | 163626745 | 163627684 | 940  | 472  | 20 | 32.91 | 5.75 | 49.24 |
| chr2 | 163746152 | 163747800 | 1649 | 1425 | 37 | 35.46 | 4.05 | 47.41 |
| chr2 | 164038136 | 164039483 | 1348 | 722  | 28 | 39.41 | 6.98 | 47.05 |
| chr2 | 164053170 | 164054336 | 1167 | 589  | 24 | 33.08 | 4.93 | 49.14 |
| chr2 | 164065690 | 164067070 | 1381 | 278  | 31 | 49.66 | 4.52 | 51.35 |
| chr2 | 164491090 | 164492033 | 944  | 544  | 23 | 30.99 | 5.14 | 50.51 |
| chr2 | 164708568 | 164709444 | 877  | 389  | 20 | 36.52 | 5.34 | 46.89 |
| chr2 | 164871088 | 164872284 | 1197 | 485  | 25 | 35.41 | 5.75 | 47.53 |
| chr2 | 165252315 | 165253051 | 737  | 478  | 20 | 46.16 | 6.16 | 48.78 |
| chr2 | 165340496 | 165341196 | 701  | 428  | 18 | 38.89 | 5.75 | 46.25 |
| chr2 | 165522694 | 165523486 | 793  | 538  | 18 | 32.85 | 4.93 | 49.28 |
| chr2 | 165583589 | 165584710 | 1122 | 511  | 25 | 39.33 | 4.52 | 46.61 |
| chr2 | 165604765 | 165605594 | 830  | 573  | 18 | 30.71 | 4.11 | 50.99 |
| chr2 | 165759047 | 165759931 | 885  | 566  | 19 | 31.81 | 4.93 | 49.78 |
| chr2 | 165848742 | 165850560 | 1819 | 1290 | 42 | 66.39 | 4.93 | 54.66 |
| chr2 | 165885412 | 165886673 | 1262 | 636  | 25 | 32.32 | 6.16 | 50.02 |
| chr2 | 165960055 | 165961082 | 1028 | 553  | 21 | 32.28 | 4.93 | 50.03 |
| chr2 | 165975346 | 165976636 | 1291 | 702  | 32 | 37.64 | 5.6  | 45.89 |
| chr2 | 166180683 | 166181388 | 706  | 373  | 21 | 54.06 | 7.39 | 52.78 |
| chr2 | 166257939 | 166259773 | 1835 | 1357 | 37 | 45.93 | 4.93 | 49.61 |
| chr2 | 166415577 | 166416450 | 874  | 503  | 21 | 41.2  | 6.16 | 46.62 |
| chr2 | 166502563 | 166504110 | 1548 | 346  | 30 | 37.39 | 4.11 | 46.66 |
| chr2 | 166663774 | 166664704 | 931  | 636  | 22 | 37.63 | 5.34 | 45.83 |
| chr2 | 166842326 | 166843270 | 945  | 572  | 20 | 32.64 | 5.75 | 49.32 |
| chr2 | 167509789 | 167510459 | 671  | 344  | 17 | 36.18 | 5.75 | 46.87 |
| chr2 | 167604499 | 167605561 | 1063 | 435  | 21 | 30.55 | 4.52 | 51.18 |
| chr2 | 167679925 | 167680914 | 990  | 709  | 27 | 56.96 | 7.39 | 52.97 |
| chr2 | 167728051 | 167728737 | 687  | 282  | 18 | 39.91 | 5.75 | 46.63 |
| chr2 | 167869053 | 167870339 | 1287 | 805  | 28 | 30.15 | 5.09 | 51.65 |

|      |           |           |      |      |    |       |      |       |
|------|-----------|-----------|------|------|----|-------|------|-------|
| chr2 | 168194203 | 168195069 | 867  | 243  | 19 | 32.82 | 5.75 | 49.42 |
| chr2 | 168468380 | 168469434 | 1055 | 400  | 21 | 30.94 | 6.57 | 50.6  |
| chr2 | 168547335 | 168548310 | 976  | 355  | 22 | 31.01 | 4.57 | 50.5  |
| chr2 | 168610257 | 168611609 | 1353 | 688  | 26 | 31.85 | 5.34 | 49.79 |
| chr2 | 169190860 | 169192156 | 1297 | 606  | 31 | 54.68 | 6.57 | 54.03 |
| chr2 | 169907389 | 169908302 | 914  | 241  | 19 | 30.26 | 4.11 | 51.67 |
| chr2 | 169965684 | 169967159 | 1476 | 1050 | 30 | 40.72 | 4.52 | 46.52 |
| chr2 | 170252476 | 170253217 | 742  | 289  | 17 | 31.55 | 4.93 | 49.94 |
| chr2 | 170319503 | 170320310 | 808  | 454  | 18 | 31.97 | 5.34 | 49.79 |
| chr2 | 170327421 | 170328457 | 1037 | 361  | 24 | 39.97 | 5.34 | 46.76 |
| chr2 | 170367947 | 170369292 | 1346 | 684  | 29 | 31.88 | 5.53 | 49.81 |
| chr2 | 170388277 | 170389343 | 1067 | 450  | 22 | 30.35 | 4.11 | 51.61 |
| chr2 | 170417343 | 170418242 | 900  | 410  | 19 | 30.64 | 5.71 | 51.18 |
| chr2 | 170654948 | 170656295 | 1348 | 674  | 33 | 37.88 | 6.2  | 46.58 |
| chr2 | 170865466 | 170866994 | 1529 | 693  | 40 | 70.27 | 5.45 | 53.45 |
| chr2 | 170892462 | 170893845 | 1384 | 1096 | 31 | 36.04 | 3.42 | 46.95 |
| chr2 | 170925148 | 170926182 | 1035 | 554  | 25 | 31.58 | 4.32 | 49.98 |
| chr2 | 171140034 | 171141652 | 1619 | 867  | 41 | 55.7  | 4.45 | 53.56 |
| chr2 | 171239049 | 171240086 | 1038 | 485  | 29 | 62.72 | 6.52 | 55.16 |
| chr2 | 171481223 | 171482129 | 907  | 286  | 20 | 34.75 | 4.52 | 47.62 |
| chr2 | 171529680 | 171531073 | 1394 | 1106 | 32 | 53.13 | 6.57 | 51.51 |
| chr2 | 171847463 | 171848386 | 924  | 690  | 21 | 34.48 | 4.62 | 47.73 |
| chr2 | 171924348 | 171925031 | 684  | 399  | 16 | 30.67 | 4.93 | 50.97 |
| chr2 | 172605106 | 172606405 | 1300 | 1030 | 29 | 32.19 | 4.03 | 49.99 |
| chr2 | 172609671 | 172610657 | 987  | 279  | 22 | 30.43 | 5.33 | 51.29 |
| chr2 | 172793690 | 172794538 | 849  | 331  | 19 | 30.67 | 5    | 51.06 |
| chr2 | 172804487 | 172805729 | 1243 | 715  | 29 | 49.23 | 7.39 | 51.07 |
| chr2 | 173524107 | 173524817 | 711  | 396  | 18 | 38.18 | 5.34 | 46.28 |
| chr2 | 174783402 | 174784377 | 976  | 285  | 26 | 38.26 | 4.61 | 46.28 |
| chr2 | 174958823 | 174959844 | 1022 | 489  | 22 | 32.59 | 6.98 | 49.35 |
| chr2 | 174970753 | 174972171 | 1419 | 565  | 35 | 31.15 | 4    | 50.59 |
| chr2 | 175131887 | 175132955 | 1069 | 717  | 23 | 34.11 | 5.34 | 48.12 |
| chr2 | 175140243 | 175141069 | 827  | 244  | 20 | 38.01 | 4.38 | 46.49 |
| chr2 | 175286583 | 175287560 | 978  | 393  | 21 | 30.9  | 4.95 | 50.66 |
| chr2 | 175803809 | 175805059 | 1251 | 529  | 25 | 32.83 | 7.39 | 49.4  |
| chr2 | 175994095 | 175995517 | 1423 | 938  | 33 | 41.25 | 4.69 | 46.83 |
| chr2 | 176559530 | 176560785 | 1256 | 609  | 29 | 42.91 | 5.33 | 47.37 |
| chr2 | 176758619 | 176759609 | 991  | 524  | 23 | 38.39 | 5.75 | 46.31 |
| chr2 | 177083511 | 177084584 | 1074 | 547  | 21 | 30.02 | 5.75 | 51.49 |
| chr2 | 177495740 | 177496700 | 961  | 265  | 21 | 31.81 | 3.81 | 49.84 |
| chr2 | 177557001 | 177558951 | 1951 | 600  | 44 | 55.2  | 4.19 | 52.97 |
| chr2 | 177784180 | 177785095 | 916  | 653  | 19 | 30.15 | 4.93 | 51.66 |
| chr2 | 177885386 | 177886564 | 1179 | 431  | 26 | 40.3  | 5.75 | 46.9  |
| chr2 | 178086894 | 178089325 | 2432 | 290  | 62 | 30.01 | 3.88 | 51.46 |
| chr2 | 178335931 | 178336887 | 957  | 331  | 21 | 33.21 | 5.06 | 49.14 |
| chr2 | 178445800 | 178447073 | 1274 | 818  | 30 | 51.7  | 5.34 | 51.45 |
| chr2 | 179399627 | 179400796 | 1170 | 485  | 25 | 36.33 | 5.3  | 47    |
| chr2 | 179401597 | 179403609 | 2013 | 734  | 41 | 48.57 | 6.09 | 49.64 |
| chr2 | 179425016 | 179426388 | 1373 | 658  | 31 | 44.23 | 5.33 | 48.26 |
| chr2 | 179441877 | 179443231 | 1355 | 526  | 29 | 41.59 | 6.85 | 47.28 |
| chr2 | 179505684 | 179506535 | 852  | 537  | 19 | 33.68 | 4.52 | 48.55 |
| chr2 | 179524319 | 179525323 | 1005 | 279  | 21 | 33.48 | 4.52 | 48.6  |

|      |           |           |      |      |    |       |      |       |
|------|-----------|-----------|------|------|----|-------|------|-------|
| chr2 | 179585845 | 179586648 | 804  | 285  | 20 | 37.08 | 6.09 | 46.94 |
| chr2 | 179630797 | 179631749 | 953  | 380  | 20 | 32.21 | 4.93 | 49.97 |
| chr2 | 179787454 | 179788278 | 825  | 284  | 19 | 35.3  | 4.93 | 47.33 |
| chr2 | 179796384 | 179797692 | 1309 | 776  | 28 | 41.39 | 4.93 | 46.99 |
| chr2 | 180384578 | 180385481 | 904  | 650  | 19 | 30.79 | 5.34 | 50.91 |
| chr2 | 180590382 | 180591380 | 999  | 262  | 24 | 42.25 | 5.34 | 47.08 |
| chr2 | 180652695 | 180653374 | 680  | 396  | 16 | 30.92 | 5.34 | 50.56 |
| chr2 | 180785444 | 180787432 | 1989 | 529  | 42 | 42.8  | 3.53 | 47.45 |
| chr2 | 181004559 | 181005225 | 667  | 405  | 16 | 31.75 | 5.34 | 49.79 |
| chr2 | 181215642 | 181216670 | 1029 | 548  | 24 | 37.89 | 5.51 | 46.65 |
| chr2 | 181375854 | 181376892 | 1039 | 282  | 24 | 35.34 | 4.95 | 47.47 |
| chr2 | 181823280 | 181823917 | 638  | 347  | 18 | 39.78 | 6.47 | 46.65 |
| chr2 | 182202508 | 182204782 | 2275 | 1765 | 47 | 31.68 | 3.74 | 49.82 |
| chr2 | 182286859 | 182287664 | 806  | 538  | 20 | 30.5  | 4.03 | 51.28 |
| chr2 | 182381943 | 182384351 | 2409 | 1095 | 53 | 32.36 | 3.65 | 49.84 |
| chr2 | 182632112 | 182633176 | 1065 | 446  | 25 | 31.63 | 5.48 | 49.89 |
| chr2 | 182684830 | 182686406 | 1577 | 283  | 30 | 43.35 | 3.29 | 47.87 |
| chr2 | 182689237 | 182690022 | 786  | 522  | 18 | 33.27 | 4.52 | 48.88 |
| chr2 | 182874899 | 182875725 | 827  | 400  | 18 | 30.88 | 4.52 | 50.73 |
| chr2 | 182949803 | 182950960 | 1158 | 609  | 25 | 34.85 | 4.72 | 47.62 |
| chr2 | 182982097 | 182982945 | 849  | 568  | 20 | 38.26 | 4.52 | 46.3  |
| chr2 | 183413444 | 183414545 | 1102 | 813  | 24 | 36.36 | 4.52 | 47.17 |
| chr2 | 183467897 | 183469446 | 1550 | 268  | 33 | 48.56 | 4.52 | 49.59 |
| chr2 | 183665947 | 183667014 | 1068 | 789  | 25 | 37.67 | 5.71 | 46.36 |
| chr2 | 183815055 | 183816231 | 1177 | 593  | 28 | 48.89 | 7.39 | 50.48 |
| chr2 | 183925364 | 183926183 | 820  | 555  | 19 | 35.61 | 6.16 | 47.29 |
| chr2 | 184049309 | 184050215 | 907  | 637  | 20 | 34.37 | 4.89 | 47.85 |
| chr2 | 184134002 | 184135303 | 1302 | 607  | 28 | 41.76 | 5.75 | 47.1  |
| chr2 | 184501799 | 184502831 | 1033 | 405  | 21 | 32.03 | 5.34 | 49.77 |
| chr2 | 184949237 | 184950071 | 835  | 272  | 18 | 30.44 | 4.52 | 51.32 |
| chr2 | 185130581 | 185131450 | 870  | 588  | 20 | 36.95 | 5.34 | 46.89 |
| chr2 | 185181710 | 185183380 | 1671 | 604  | 33 | 38.48 | 4.89 | 46.4  |
| chr2 | 185322886 | 185324064 | 1179 | 675  | 25 | 36.31 | 5.34 | 47.01 |
| chr2 | 185486059 | 185487177 | 1119 | 595  | 25 | 33.58 | 4.47 | 48.72 |
| chr2 | 185634778 | 185636366 | 1589 | 1309 | 31 | 30.65 | 3.99 | 51.13 |
| chr2 | 185808242 | 185809499 | 1258 | 456  | 26 | 36.22 | 5.75 | 46.97 |
| chr2 | 185887254 | 185888244 | 991  | 389  | 25 | 47.28 | 6.16 | 48.1  |
| chr2 | 185898518 | 185900102 | 1585 | 267  | 34 | 46.76 | 5.34 | 47.39 |
| chr2 | 186526608 | 186528201 | 1594 | 942  | 35 | 50.21 | 6.16 | 51.44 |
| chr2 | 186654701 | 186655602 | 902  | 617  | 19 | 30.89 | 5.34 | 50.73 |
| chr2 | 186701764 | 186703270 | 1507 | 1109 | 42 | 87.38 | 7.39 | 44.44 |
| chr2 | 186832142 | 186832910 | 769  | 241  | 19 | 38.92 | 5.75 | 46.24 |
| chr2 | 186943799 | 186945071 | 1273 | 605  | 30 | 51.76 | 4.93 | 50.95 |
| chr2 | 187124928 | 187125928 | 1001 | 636  | 23 | 33.52 | 4.95 | 48.62 |
| chr2 | 187224676 | 187225295 | 620  | 335  | 16 | 34.96 | 6.16 | 47.71 |
| chr2 | 187274407 | 187275461 | 1055 | 290  | 21 | 30.94 | 4.52 | 50.6  |
| chr2 | 187597838 | 187598508 | 671  | 285  | 16 | 31.49 | 3.7  | 49.84 |
| chr2 | 187800912 | 187801833 | 922  | 682  | 21 | 33.99 | 4.95 | 48.55 |
| chr2 | 187925477 | 187926251 | 775  | 487  | 20 | 43.3  | 5.34 | 48.08 |
| chr2 | 188033899 | 188034852 | 954  | 255  | 20 | 32.16 | 4.52 | 49.86 |
| chr2 | 188071036 | 188072052 | 1017 | 614  | 23 | 36.9  | 6.98 | 46.75 |
| chr2 | 188360070 | 188360953 | 884  | 629  | 20 | 31.59 | 4.89 | 50.02 |

|      |           |           |      |      |    |       |      |       |
|------|-----------|-----------|------|------|----|-------|------|-------|
| chr2 | 188631693 | 188632811 | 1119 | 419  | 24 | 35.47 | 5.75 | 47.43 |
| chr2 | 188644827 | 188646052 | 1226 | 523  | 25 | 34    | 7.39 | 48.58 |
| chr2 | 189016860 | 189018456 | 1597 | 461  | 35 | 43.79 | 4.57 | 47.85 |
| chr2 | 189045646 | 189046382 | 737  | 477  | 17 | 31.85 | 4.52 | 49.71 |
| chr2 | 189572514 | 189573535 | 1022 | 626  | 21 | 32.59 | 4.52 | 49.35 |
| chr2 | 191066063 | 191067257 | 1195 | 543  | 28 | 32.9  | 4.94 | 49.33 |
| chr2 | 191096017 | 191097687 | 1671 | 1077 | 37 | 45.52 | 4.84 | 49.93 |
| chr2 | 191103268 | 191104173 | 906  | 463  | 19 | 30.68 | 5.75 | 51.01 |
| chr2 | 191258879 | 191260218 | 1340 | 759  | 27 | 34.1  | 6.77 | 48.18 |
| chr2 | 191281629 | 191282313 | 685  | 395  | 16 | 30.61 | 6.16 | 51.15 |
| chr2 | 191448010 | 191449731 | 1722 | 1150 | 33 | 36.85 | 5.34 | 46.81 |
| chr2 | 191472835 | 191473715 | 881  | 280  | 22 | 40.74 | 4.52 | 46.6  |
| chr2 | 191661294 | 191662195 | 902  | 528  | 20 | 35.04 | 5.75 | 47.43 |
| chr2 | 191807439 | 191808662 | 1224 | 780  | 26 | 30.1  | 3.97 | 51.54 |
| chr2 | 191944551 | 191945338 | 788  | 288  | 18 | 33.15 | 5.34 | 49.12 |
| chr2 | 192434728 | 192435480 | 753  | 465  | 19 | 37.2  | 4.67 | 46.96 |
| chr2 | 192454480 | 192455391 | 912  | 277  | 21 | 38.78 | 4.93 | 46.06 |
| chr2 | 192589683 | 192591309 | 1627 | 326  | 36 | 52.44 | 4.52 | 50.39 |
| chr2 | 192622254 | 192622814 | 561  | 280  | 18 | 34.23 | 5.6  | 47.91 |
| chr2 | 193125667 | 193126340 | 674  | 289  | 16 | 31.3  | 5.75 | 50.33 |
| chr2 | 193406684 | 193407629 | 946  | 657  | 23 | 41.11 | 5.75 | 46.37 |
| chr2 | 193414256 | 193415206 | 951  | 480  | 21 | 36.46 | 5.34 | 47.14 |
| chr2 | 193531492 | 193532124 | 633  | 348  | 16 | 34.04 | 6.16 | 48.54 |
| chr2 | 193550787 | 193551665 | 879  | 375  | 20 | 32.43 | 4.95 | 49.55 |
| chr2 | 193599586 | 193600445 | 860  | 634  | 19 | 33.22 | 4.11 | 49.11 |
| chr2 | 193655116 | 193656576 | 1461 | 559  | 30 | 36.88 | 4.23 | 46.72 |
| chr2 | 193948473 | 193949376 | 904  | 638  | 20 | 32.73 | 5.12 | 49.32 |
| chr2 | 194421458 | 194422224 | 767  | 494  | 19 | 39.05 | 5.34 | 46.26 |
| chr2 | 194560944 | 194561953 | 1010 | 480  | 21 | 33.21 | 4.52 | 49.14 |
| chr2 | 194632364 | 194633322 | 959  | 677  | 21 | 35.59 | 4.48 | 47.21 |
| chr2 | 194687301 | 194688138 | 838  | 289  | 21 | 43.64 | 4.93 | 47.72 |
| chr2 | 194810665 | 194811596 | 932  | 281  | 21 | 35.97 | 4.39 | 47.05 |
| chr2 | 195264952 | 195267428 | 2477 | 1775 | 57 | 82.86 | 8.63 | 48.94 |
| chr2 | 195361459 | 195363008 | 1550 | 890  | 36 | 56.73 | 5.34 | 53.4  |
| chr2 | 195492953 | 195493612 | 660  | 375  | 16 | 32.21 | 5.75 | 49.94 |
| chr2 | 195510114 | 195511207 | 1094 | 535  | 24 | 36.35 | 7.75 | 47.08 |
| chr2 | 195619737 | 195620499 | 763  | 479  | 17 | 30.3  | 5.34 | 51.54 |
| chr2 | 195632075 | 195632838 | 764  | 281  | 20 | 44.11 | 7.39 | 48.08 |
| chr2 | 195794872 | 195795857 | 986  | 239  | 23 | 38.68 | 4.52 | 46.15 |
| chr2 | 195888818 | 195889800 | 983  | 432  | 20 | 30.66 | 5.34 | 51.1  |
| chr2 | 195957453 | 195958567 | 1115 | 836  | 26 | 38.98 | 4.57 | 46.16 |
| chr2 | 196505246 | 196506413 | 1168 | 673  | 30 | 31.9  | 4    | 49.86 |
| chr2 | 196670534 | 196673007 | 2474 | 999  | 50 | 37.92 | 3.99 | 46.55 |
| chr2 | 196735600 | 196736362 | 763  | 385  | 19 | 39.33 | 6.57 | 46.6  |
| chr2 | 196750301 | 196751215 | 915  | 651  | 20 | 34.3  | 4.93 | 47.81 |
| chr2 | 196766466 | 196767439 | 974  | 264  | 20 | 31.12 | 4.93 | 50.72 |
| chr2 | 197201635 | 197202346 | 712  | 285  | 17 | 30.48 | 5.39 | 51.26 |
| chr2 | 197487772 | 197489299 | 1528 | 1256 | 34 | 49.73 | 4.93 | 51.85 |
| chr2 | 197498461 | 197499708 | 1248 | 672  | 31 | 41.31 | 4.32 | 46.91 |
| chr2 | 197669104 | 197670214 | 1111 | 397  | 27 | 48.58 | 5.75 | 49.69 |
| chr2 | 197672086 | 197673579 | 1494 | 793  | 33 | 46.03 | 6.04 | 49.57 |
| chr2 | 197790988 | 197793127 | 2140 | 578  | 51 | 53.78 | 5.22 | 52.34 |

|      |           |           |      |      |    |       |      |       |
|------|-----------|-----------|------|------|----|-------|------|-------|
| chr2 | 197901502 | 197903293 | 1792 | 392  | 37 | 33.42 | 3.81 | 48.65 |
| chr2 | 197932896 | 197934807 | 1912 | 1254 | 47 | 49.4  | 4.76 | 51.31 |
| chr2 | 198193087 | 198194996 | 1910 | 563  | 44 | 41.37 | 4.98 | 46.98 |
| chr2 | 198261499 | 198263583 | 2085 | 286  | 47 | 31.7  | 3.42 | 49.75 |
| chr2 | 199024394 | 199025266 | 873  | 252  | 19 | 32.48 | 4.52 | 49.44 |
| chr2 | 199054206 | 199054994 | 789  | 290  | 21 | 47.21 | 5.34 | 47.78 |
| chr2 | 199453517 | 199454798 | 1282 | 608  | 31 | 55.62 | 7.8  | 53.96 |
| chr2 | 200212554 | 200213335 | 782  | 497  | 19 | 38.04 | 5.75 | 46.37 |
| chr2 | 200444404 | 200445330 | 927  | 670  | 20 | 33.62 | 4.52 | 48.71 |
| chr2 | 200516894 | 200517644 | 751  | 341  | 19 | 38.54 | 6.37 | 46.24 |
| chr2 | 200805068 | 200805853 | 786  | 510  | 21 | 36.94 | 4.79 | 46.91 |
| chr2 | 201244109 | 201245007 | 899  | 677  | 21 | 35.35 | 5.71 | 47.46 |
| chr2 | 201380858 | 201382120 | 1263 | 734  | 29 | 42.51 | 6.47 | 47.3  |
| chr2 | 201620409 | 201621332 | 924  | 586  | 20 | 31.62 | 5.12 | 49.88 |
| chr2 | 201621875 | 201622764 | 890  | 582  | 24 | 32.73 | 4.36 | 49.36 |
| chr2 | 201828080 | 201829632 | 1553 | 716  | 39 | 36.37 | 4.85 | 47.16 |
| chr2 | 202289747 | 202290532 | 786  | 577  | 19 | 37.78 | 4.11 | 46.69 |
| chr2 | 202909008 | 202910459 | 1452 | 1078 | 31 | 45.78 | 5.34 | 49.96 |
| chr2 | 202968928 | 202969959 | 1032 | 477  | 22 | 32.08 | 5.34 | 49.81 |
| chr2 | 203265200 | 203266033 | 834  | 236  | 20 | 39.23 | 4.93 | 46.45 |
| chr2 | 203641299 | 203642732 | 1434 | 774  | 27 | 31.86 | 7.8  | 49.72 |
| chr2 | 203675056 | 203677125 | 2070 | 1492 | 39 | 46.09 | 6.16 | 49.34 |
| chr2 | 203682663 | 203684070 | 1408 | 831  | 30 | 44.13 | 6.98 | 47.98 |
| chr2 | 203849995 | 203851054 | 1060 | 540  | 23 | 30.44 | 4.95 | 51.3  |
| chr2 | 203913601 | 203916495 | 2895 | 577  | 68 | 62.19 | 4.48 | 54.24 |
| chr2 | 203955332 | 203956894 | 1563 | 360  | 32 | 43.46 | 3.67 | 48.04 |
| chr2 | 203962899 | 203963771 | 873  | 441  | 21 | 34.59 | 5.46 | 47.69 |
| chr2 | 204602954 | 204603935 | 982  | 430  | 27 | 57.57 | 5.75 | 53.97 |
| chr2 | 204894363 | 204895282 | 920  | 668  | 20 | 34.02 | 4.93 | 48.52 |
| chr2 | 205085459 | 205086284 | 826  | 287  | 19 | 35.24 | 6.98 | 47.26 |
| chr2 | 205275528 | 205276491 | 964  | 587  | 21 | 35.72 | 4.11 | 47.25 |
| chr2 | 205466653 | 205467726 | 1074 | 794  | 29 | 60.56 | 7.39 | 55.31 |
| chr2 | 205502859 | 205503739 | 881  | 276  | 20 | 36.28 | 4.11 | 46.9  |
| chr2 | 205513652 | 205514469 | 818  | 288  | 19 | 34.42 | 5.2  | 47.81 |
| chr2 | 205698152 | 205699115 | 964  | 305  | 20 | 31.63 | 6.16 | 49.87 |
| chr2 | 205821809 | 205822735 | 927  | 270  | 20 | 33.62 | 4.52 | 48.71 |
| chr2 | 205924383 | 205925226 | 844  | 345  | 21 | 43.22 | 5.34 | 47.65 |
| chr2 | 205945625 | 205946585 | 961  | 420  | 20 | 31.79 | 6.16 | 49.8  |
| chr2 | 206074440 | 206075610 | 1171 | 636  | 30 | 31.73 | 5.42 | 49.74 |
| chr2 | 206189082 | 206190408 | 1327 | 644  | 32 | 57.24 | 7.39 | 53.06 |
| chr2 | 206274021 | 206275418 | 1398 | 883  | 31 | 42.88 | 5.33 | 47.35 |
| chr2 | 206390233 | 206391222 | 990  | 659  | 21 | 33.25 | 4.03 | 48.92 |
| chr2 | 206460971 | 206461968 | 998  | 730  | 22 | 33.85 | 5.34 | 48.73 |
| chr2 | 206667377 | 206668311 | 935  | 492  | 21 | 37.39 | 5.75 | 46.67 |
| chr2 | 206890597 | 206892082 | 1486 | 911  | 30 | 34.98 | 4.95 | 47.61 |
| chr2 | 206937915 | 206938812 | 898  | 268  | 20 | 35.28 | 5.34 | 47.36 |
| chr2 | 207786637 | 207787553 | 917  | 649  | 19 | 30.1  | 4.11 | 51.55 |
| chr2 | 208339213 | 208340501 | 1289 | 660  | 29 | 34    | 4.79 | 48.57 |
| chr2 | 208432039 | 208434567 | 2529 | 1549 | 63 | 58.22 | 4.76 | 54.42 |
| chr2 | 208866200 | 208867113 | 914  | 709  | 19 | 30.26 | 4.52 | 51.67 |
| chr2 | 209114633 | 209116540 | 1908 | 790  | 51 | 52.64 | 3.74 | 50.48 |
| chr2 | 209490704 | 209491601 | 898  | 649  | 19 | 31.11 | 4.11 | 50.64 |

|      |           |           |      |      |    |       |      |       |
|------|-----------|-----------|------|------|----|-------|------|-------|
| chr2 | 209495941 | 209496989 | 1049 | 594  | 24 | 39.28 | 5.75 | 46.43 |
| chr2 | 209688283 | 209689172 | 890  | 469  | 24 | 49.1  | 7.75 | 50.61 |
| chr2 | 209987319 | 209988943 | 1625 | 1102 | 31 | 30.87 | 4.47 | 50.84 |
| chr2 | 210183697 | 210184634 | 938  | 724  | 26 | 48.97 | 4.09 | 50.54 |
| chr2 | 210326964 | 210328076 | 1113 | 402  | 27 | 48.45 | 5.34 | 49.34 |
| chr2 | 211057279 | 211058155 | 877  | 590  | 20 | 36.52 | 4.93 | 46.89 |
| chr2 | 211378853 | 211380381 | 1529 | 1171 | 36 | 52.16 | 5.39 | 51.21 |
| chr2 | 211455319 | 211456133 | 815  | 291  | 18 | 31.56 | 4.93 | 49.92 |
| chr2 | 211467578 | 211468560 | 983  | 647  | 21 | 34.66 | 4.52 | 47.66 |
| chr2 | 211487240 | 211488065 | 826  | 286  | 19 | 31.45 | 6.09 | 50.04 |
| chr2 | 211634414 | 211635202 | 789  | 580  | 18 | 33.09 | 4.11 | 49.16 |
| chr2 | 211871331 | 211872175 | 845  | 467  | 22 | 38.77 | 5.71 | 46.02 |
| chr2 | 211888268 | 211889071 | 804  | 272  | 20 | 41.24 | 4.11 | 46.72 |
| chr2 | 212154522 | 212155799 | 1278 | 584  | 26 | 35.25 | 5.34 | 47.32 |
| chr2 | 212794187 | 212794650 | 464  | 232  | 15 | 43.92 | 5.14 | 47.75 |
| chr2 | 212800628 | 212802225 | 1598 | 554  | 30 | 35.23 | 5.34 | 47.23 |
| chr2 | 212909511 | 212910176 | 666  | 351  | 16 | 31.82 | 4.11 | 49.84 |
| chr2 | 213320848 | 213322012 | 1165 | 710  | 24 | 33.17 | 4.93 | 49.13 |
| chr2 | 213923388 | 213924439 | 1052 | 282  | 24 | 37.95 | 4.43 | 46.49 |
| chr2 | 214099410 | 214100529 | 1120 | 789  | 26 | 43.64 | 6.57 | 47.88 |
| chr2 | 214141118 | 214141951 | 834  | 269  | 20 | 39.23 | 6.98 | 46.45 |
| chr2 | 214538271 | 214539310 | 1040 | 632  | 22 | 31.68 | 6.16 | 49.85 |
| chr2 | 214819521 | 214820838 | 1318 | 749  | 27 | 37.08 | 5.75 | 46.93 |
| chr2 | 214822947 | 214824141 | 1195 | 566  | 24 | 31.75 | 6.16 | 49.81 |
| chr2 | 215592785 | 215594261 | 1477 | 777  | 38 | 62.64 | 6.85 | 55.11 |
| chr2 | 215644686 | 215646467 | 1782 | 938  | 53 | 35.16 | 4.92 | 47.08 |
| chr2 | 215910194 | 215910936 | 743  | 375  | 19 | 40.73 | 5.75 | 46.57 |
| chr2 | 216009826 | 216010828 | 1003 | 521  | 21 | 33.58 | 6.16 | 48.66 |
| chr2 | 216440981 | 216442012 | 1032 | 562  | 23 | 36.07 | 5.34 | 46.98 |
| chr2 | 217276452 | 217277667 | 1216 | 666  | 31 | 32.46 | 4.57 | 49.46 |
| chr2 | 218132740 | 218133629 | 890  | 613  | 19 | 31.54 | 4.11 | 49.9  |
| chr2 | 218192449 | 218193719 | 1271 | 478  | 27 | 39.43 | 5.34 | 47.1  |
| chr2 | 219359185 | 219360318 | 1134 | 384  | 27 | 36.37 | 4.19 | 47.15 |
| chr2 | 219744453 | 219745317 | 865  | 542  | 20 | 37.26 | 4.93 | 46.48 |
| chr2 | 219817545 | 219818360 | 816  | 533  | 18 | 31.51 | 4.52 | 49.84 |
| chr2 | 219860288 | 219861406 | 1119 | 496  | 25 | 39.5  | 6.98 | 47    |
| chr2 | 220793206 | 220794038 | 833  | 514  | 19 | 34.81 | 6.98 | 47.51 |
| chr2 | 221464840 | 221465810 | 971  | 705  | 22 | 35.32 | 5.34 | 47.45 |
| chr2 | 222610258 | 222611226 | 969  | 464  | 20 | 31.37 | 6.16 | 50.25 |
| chr2 | 223439278 | 223440617 | 1340 | 641  | 27 | 36.03 | 6.57 | 46.98 |
| chr2 | 223457715 | 223458842 | 1128 | 527  | 23 | 31.19 | 6.57 | 50.51 |
| chr2 | 223861055 | 223861777 | 723  | 451  | 19 | 41.79 | 4.89 | 47.03 |
| chr2 | 223892517 | 223893197 | 681  | 411  | 17 | 35.48 | 4.52 | 47.41 |
| chr2 | 224158594 | 224159310 | 717  | 462  | 18 | 37.76 | 5.34 | 46.71 |
| chr2 | 224564578 | 224565302 | 725  | 436  | 18 | 37.2  | 4.93 | 46.93 |
| chr2 | 224853600 | 224854672 | 1073 | 396  | 26 | 46.51 | 5.75 | 48.05 |
| chr2 | 225163032 | 225163938 | 907  | 634  | 19 | 30.63 | 5.34 | 51.2  |
| chr2 | 225376152 | 225377632 | 1481 | 754  | 35 | 47.24 | 7    | 48.11 |
| chr2 | 226105326 | 226106554 | 1229 | 499  | 25 | 33.86 | 6.16 | 48.76 |
| chr2 | 226115834 | 226116739 | 906  | 622  | 19 | 30.68 | 4.52 | 51.01 |
| chr2 | 226841628 | 226842660 | 1033 | 397  | 21 | 32.03 | 4.93 | 49.77 |
| chr2 | 227066881 | 227067788 | 908  | 278  | 20 | 34.7  | 5.34 | 47.74 |

|       |           |           |      |      |    |       |      |       |
|-------|-----------|-----------|------|------|----|-------|------|-------|
| chr2  | 227344755 | 227345951 | 1197 | 402  | 27 | 43.42 | 5.34 | 47.88 |
| chr2  | 227606806 | 227607935 | 1130 | 574  | 24 | 30.63 | 5.33 | 51.2  |
| chr2  | 227633859 | 227635564 | 1706 | 271  | 32 | 35.32 | 3.58 | 47.44 |
| chr2  | 227660416 | 227661904 | 1489 | 715  | 42 | 34.95 | 4.58 | 47.68 |
| chr2  | 228097329 | 228098180 | 852  | 432  | 19 | 33.68 | 4.93 | 48.55 |
| chr2  | 228400933 | 228402224 | 1292 | 648  | 27 | 36.38 | 5.18 | 47.19 |
| chr2  | 228501113 | 228502075 | 963  | 700  | 21 | 31.7  | 4.95 | 49.76 |
| chr2  | 228660552 | 228661886 | 1335 | 703  | 29 | 31.76 | 5.82 | 49.85 |
| chr2  | 230269171 | 230270163 | 993  | 745  | 21 | 34.12 | 4.11 | 48.07 |
| chr2  | 230367633 | 230368418 | 786  | 249  | 18 | 33.27 | 4.52 | 48.88 |
| chr2  | 230438822 | 230439782 | 961  | 677  | 21 | 35.89 | 4.93 | 46.97 |
| chr2  | 230606481 | 230607385 | 905  | 583  | 19 | 30.73 | 4.11 | 50.98 |
| chr2  | 230623003 | 230624086 | 1084 | 329  | 25 | 41.49 | 5.34 | 47.06 |
| chr2  | 230902268 | 230902876 | 609  | 403  | 20 | 57.58 | 6.98 | 54.11 |
| chr2  | 231232696 | 231233775 | 1080 | 634  | 29 | 40.07 | 4.4  | 46.57 |
| chr2  | 231280648 | 231282810 | 2163 | 1576 | 57 | 39.33 | 3.42 | 46.56 |
| chr2  | 231335925 | 231336797 | 873  | 630  | 22 | 30.31 | 3.69 | 51.58 |
| chr2  | 231404098 | 231405085 | 988  | 715  | 20 | 30.41 | 4.52 | 51.4  |
| chr2  | 231627895 | 231629292 | 1398 | 760  | 32 | 38.78 | 4.45 | 46.02 |
| chr2  | 231767065 | 231768617 | 1553 | 1070 | 40 | 33.01 | 5.01 | 49.15 |
| chr2  | 231838494 | 231839524 | 1031 | 274  | 25 | 39.15 | 5.27 | 46.27 |
| chr2  | 231985616 | 231987793 | 2178 | 288  | 51 | 33.34 | 3.95 | 48.69 |
| chr2  | 232164730 | 232165613 | 884  | 379  | 20 | 36.1  | 4.93 | 47.01 |
| chr2  | 232463019 | 232463997 | 979  | 530  | 21 | 33.84 | 6.04 | 48.74 |
| chr2  | 232933671 | 232934647 | 977  | 384  | 21 | 34.99 | 4.93 | 47.61 |
| chr2  | 233557273 | 233558184 | 912  | 207  | 19 | 30.36 | 4.52 | 51.57 |
| chr2  | 233605014 | 233606404 | 1391 | 644  | 33 | 50.77 | 5.97 | 51.8  |
| chr2  | 233688753 | 233689546 | 794  | 279  | 19 | 31.78 | 4.42 | 49.87 |
| chr2  | 233851618 | 233852480 | 863  | 261  | 20 | 37.38 | 4.52 | 46.58 |
| chr2  | 234469915 | 234471388 | 1474 | 695  | 33 | 35    | 4.79 | 47.63 |
| chr2  | 234567167 | 234568052 | 886  | 549  | 19 | 31.76 | 4.93 | 49.79 |
| chr2  | 234575878 | 234577427 | 1550 | 233  | 31 | 30.65 | 3.54 | 51.14 |
| chr2  | 235663584 | 235664425 | 842  | 254  | 18 | 30.05 | 4.52 | 51.39 |
| chr2  | 237903369 | 237904122 | 754  | 259  | 19 | 35.98 | 4.95 | 47.05 |
| chr2  | 239297765 | 239298541 | 777  | 428  | 22 | 41.07 | 5.83 | 46.35 |
| chr2  | 239530331 | 239531858 | 1528 | 727  | 37 | 31.71 | 4.57 | 49.73 |
| chr2  | 239953891 | 239954658 | 768  | 481  | 18 | 34.38 | 6.16 | 47.81 |
| chr2  | 242315767 | 242316639 | 873  | 575  | 20 | 31.67 | 4.47 | 49.85 |
| chr2  | 242521146 | 242521956 | 811  | 357  | 18 | 31.79 | 4.52 | 49.76 |
| chr2  | 242855708 | 242856752 | 1045 | 448  | 24 | 39.5  | 4.93 | 47.08 |
| chr2  | 243028407 | 243030292 | 1886 | 1175 | 46 | 30.85 | 3.42 | 50.91 |
| chr2  | 243053900 | 243054783 | 884  | 286  | 21 | 40.55 | 6.57 | 46.93 |
| chr20 | 135736    | 136671    | 936  | 648  | 21 | 37.33 | 4.52 | 46.7  |
| chr20 | 146892    | 147618    | 727  | 479  | 18 | 37.07 | 4.93 | 46.97 |
| chr20 | 1437758   | 1438617   | 860  | 283  | 19 | 33.22 | 5.75 | 49.11 |
| chr20 | 1463335   | 1464138   | 804  | 215  | 18 | 32.2  | 4.93 | 49.96 |
| chr20 | 2708699   | 2710689   | 1991 | 754  | 44 | 43.15 | 5.82 | 47.36 |
| chr20 | 2760466   | 2761535   | 1070 | 631  | 26 | 46.7  | 5.75 | 47.49 |
| chr20 | 3024419   | 3025652   | 1234 | 485  | 30 | 38.45 | 3.99 | 46.38 |
| chr20 | 3155324   | 3157447   | 2124 | 1467 | 45 | 58.07 | 5.34 | 53.46 |
| chr20 | 3243561   | 3244118   | 558  | 279  | 15 | 34.22 | 5.71 | 47.93 |
| chr20 | 3451153   | 3452062   | 910  | 285  | 23 | 38.9  | 5.33 | 46.27 |

|       |          |          |      |      |    |       |      |       |
|-------|----------|----------|------|------|----|-------|------|-------|
| chr20 | 4364483  | 4365726  | 1244 | 604  | 27 | 40.84 | 6.16 | 46.36 |
| chr20 | 4758535  | 4759581  | 1047 | 701  | 26 | 41.61 | 4.84 | 47.2  |
| chr20 | 4958625  | 4960451  | 1827 | 272  | 39 | 42.21 | 4.33 | 46.95 |
| chr20 | 5120146  | 5121430  | 1285 | 590  | 26 | 34.92 | 5.34 | 47.58 |
| chr20 | 5431835  | 5432885  | 1051 | 439  | 21 | 31.13 | 7.39 | 50.63 |
| chr20 | 5548090  | 5549897  | 1808 | 656  | 38 | 40.34 | 4.03 | 46.91 |
| chr20 | 5637842  | 5638707  | 866  | 586  | 19 | 32.88 | 6.57 | 49.29 |
| chr20 | 5647096  | 5648228  | 1133 | 324  | 27 | 47.2  | 6.16 | 47.69 |
| chr20 | 5930461  | 5931723  | 1263 | 437  | 29 | 35.33 | 4.79 | 47.47 |
| chr20 | 6321546  | 6322367  | 822  | 557  | 21 | 44.77 | 4.93 | 48.85 |
| chr20 | 6664213  | 6664831  | 619  | 335  | 18 | 45.33 | 6.98 | 49.35 |
| chr20 | 7251841  | 7252651  | 811  | 257  | 18 | 31.79 | 5.34 | 49.76 |
| chr20 | 7960815  | 7961839  | 1025 | 329  | 26 | 44.45 | 6.47 | 48.51 |
| chr20 | 8024484  | 8025305  | 822  | 220  | 20 | 30.51 | 3.77 | 51.29 |
| chr20 | 8106420  | 8107060  | 641  | 278  | 16 | 33.48 | 4.93 | 48.68 |
| chr20 | 8553897  | 8554669  | 773  | 506  | 18 | 30.47 | 4.19 | 51.22 |
| chr20 | 9384514  | 9385255  | 742  | 257  | 17 | 31.55 | 6.16 | 49.94 |
| chr20 | 9545254  | 9547202  | 1949 | 710  | 39 | 47.92 | 6.16 | 49.19 |
| chr20 | 9560411  | 9561376  | 966  | 216  | 20 | 31.53 | 4.93 | 49.91 |
| chr20 | 9793485  | 9794702  | 1218 | 533  | 26 | 38.23 | 8.22 | 46.28 |
| chr20 | 10054253 | 10055737 | 1485 | 376  | 32 | 33.79 | 3.39 | 48.74 |
| chr20 | 10591144 | 10591985 | 842  | 573  | 18 | 30.05 | 4.93 | 51.39 |
| chr20 | 10933199 | 10934033 | 835  | 265  | 22 | 39.44 | 4.57 | 47.09 |
| chr20 | 12903135 | 12903880 | 746  | 217  | 17 | 31.31 | 6.57 | 50.36 |
| chr20 | 12919957 | 12920732 | 776  | 264  | 19 | 38.44 | 4.93 | 46.41 |
| chr20 | 13026736 | 13027762 | 1027 | 368  | 25 | 40.08 | 5.71 | 46.58 |
| chr20 | 13391496 | 13392239 | 744  | 371  | 18 | 35.93 | 5.34 | 47.06 |
| chr20 | 13433249 | 13434007 | 759  | 485  | 21 | 49.56 | 7.8  | 51.23 |
| chr20 | 13439073 | 13440031 | 959  | 356  | 20 | 31.9  | 4.93 | 49.83 |
| chr20 | 13558035 | 13559584 | 1550 | 938  | 31 | 40.92 | 4.93 | 46.44 |
| chr20 | 13666028 | 13667158 | 1131 | 503  | 24 | 34.86 | 5.75 | 47.63 |
| chr20 | 14019064 | 14019946 | 883  | 613  | 19 | 31.92 | 4.11 | 49.72 |
| chr20 | 14082246 | 14083207 | 962  | 631  | 21 | 34.15 | 5.18 | 47.99 |
| chr20 | 15853952 | 15854820 | 869  | 562  | 22 | 41.53 | 5.75 | 47.2  |
| chr20 | 16065562 | 16066795 | 1234 | 544  | 29 | 41.84 | 4.05 | 47.06 |
| chr20 | 16210218 | 16211047 | 830  | 266  | 20 | 35.4  | 4.95 | 47.55 |
| chr20 | 16433511 | 16435441 | 1931 | 1371 | 42 | 60.16 | 6.98 | 55.16 |
| chr20 | 17978388 | 17979583 | 1196 | 560  | 29 | 52.14 | 6.16 | 50.98 |
| chr20 | 18491375 | 18492741 | 1367 | 569  | 30 | 40.74 | 4.95 | 46.62 |
| chr20 | 19604620 | 19605919 | 1300 | 692  | 28 | 40.55 | 6.04 | 46.91 |
| chr20 | 19721318 | 19722645 | 1328 | 589  | 27 | 36.6  | 5.75 | 46.9  |
| chr20 | 20016034 | 20017203 | 1170 | 659  | 24 | 32.93 | 4.52 | 49.34 |
| chr20 | 20452137 | 20452971 | 835  | 274  | 18 | 30.44 | 4.52 | 51.32 |
| chr20 | 20962643 | 20963675 | 1033 | 653  | 26 | 49.11 | 5.75 | 50.72 |
| chr20 | 21044750 | 21046020 | 1271 | 807  | 28 | 43.42 | 6.57 | 47.88 |
| chr20 | 21306034 | 21307766 | 1733 | 1056 | 40 | 37.85 | 4.37 | 46.82 |
| chr20 | 21446471 | 21447539 | 1069 | 637  | 22 | 30.26 | 4.11 | 51.61 |
| chr20 | 21509502 | 21511181 | 1680 | 266  | 35 | 45.87 | 4.11 | 50.19 |
| chr20 | 21907436 | 21908177 | 742  | 488  | 17 | 31.55 | 6.16 | 49.94 |
| chr20 | 22172407 | 22173256 | 850  | 455  | 19 | 33.8  | 5.34 | 48.83 |
| chr20 | 22846316 | 22847485 | 1170 | 817  | 28 | 49.32 | 5.75 | 51.02 |
| chr20 | 23104330 | 23105228 | 899  | 226  | 19 | 31.05 | 4.52 | 50.69 |



|       |          |          |      |      |      |        |      |       |
|-------|----------|----------|------|------|------|--------|------|-------|
| chr20 | 23114998 | 23115987 | 990  | 733  | 20   | 30.31  | 4.93 | 51.56 |
| chr20 | 23750791 | 23751664 | 874  | 289  | 20   | 36.71  | 4.52 | 46.91 |
| chr20 | 24912641 | 24913647 | 1007 | 717  | 24   | 41.76  | 5.34 | 47.11 |
| chr20 | 25404207 | 25405074 | 868  | 489  | 19   | 30.69  | 3.94 | 51.04 |
| chr20 | 25646980 | 25647997 | 1018 | 476  | 23   | 36.85  | 5.75 | 46.82 |
| chr20 | 25880726 | 25882014 | 1289 | 635  | 30   | 34.82  | 4.28 | 47.5  |
| chr20 | 26122455 | 26125263 | 2809 | 2070 | 87   | 30.76  | 3.92 | 50.95 |
| chr20 | 26188079 | 26190496 | 2418 | 1953 | 1528 | 429.05 | 6.52 | 28.57 |
| chr20 | 29446570 | 29452612 | 6043 | 3304 | 193  | 36.82  | 3.27 | 46.84 |
| chr20 | 30433964 | 30435031 | 1068 | 546  | 21   | 30.31  | 4.52 | 51.54 |
| chr20 | 30470856 | 30472162 | 1307 | 721  | 27   | 37.62  | 5.34 | 45.82 |
| chr20 | 30865856 | 30866903 | 1048 | 276  | 26   | 31.12  | 4.4  | 50.7  |
| chr20 | 31012379 | 31013696 | 1318 | 602  | 26   | 33.4   | 5.34 | 48.7  |
| chr20 | 31022273 | 31023701 | 1429 | 667  | 32   | 39.4   | 6    | 46.94 |
| chr20 | 31031548 | 31032481 | 934  | 663  | 24   | 46.47  | 5.34 | 48.3  |
| chr20 | 31987609 | 31989322 | 1714 | 465  | 40   | 34.88  | 4.17 | 47.67 |
| chr20 | 32593671 | 32594438 | 768  | 372  | 19   | 38.99  | 5.34 | 46.16 |
| chr20 | 32856169 | 32857070 | 902  | 286  | 19   | 30.89  | 5.75 | 50.73 |
| chr20 | 33023119 | 33024878 | 1760 | 492  | 41   | 39.35  | 3.74 | 46.82 |
| chr20 | 33191252 | 33192686 | 1435 | 805  | 29   | 38.95  | 4.52 | 46.16 |
| chr20 | 33643395 | 33644479 | 1085 | 437  | 23   | 31.61  | 5.58 | 49.96 |
| chr20 | 33648565 | 33649745 | 1181 | 471  | 26   | 35.41  | 4.57 | 47.52 |
| chr20 | 33672049 | 33673599 | 1551 | 622  | 32   | 34.29  | 3.57 | 47.83 |
| chr20 | 34429855 | 34430749 | 895  | 283  | 24   | 49.22  | 5.34 | 51.01 |
| chr20 | 34658074 | 34660028 | 1955 | 1217 | 39   | 47.65  | 5.75 | 49.26 |
| chr20 | 35146967 | 35147796 | 830  | 555  | 18   | 30.71  | 4.93 | 50.99 |
| chr20 | 35935575 | 35936475 | 901  | 283  | 21   | 39.47  | 6.57 | 47    |
| chr20 | 36025773 | 36026709 | 937  | 404  | 21   | 33.14  | 6.09 | 49.17 |
| chr20 | 36378109 | 36379165 | 1057 | 313  | 21   | 30.84  | 4.11 | 50.83 |
| chr20 | 36755756 | 36756761 | 1006 | 674  | 22   | 33.42  | 5.34 | 48.69 |
| chr20 | 37213505 | 37214234 | 730  | 444  | 17   | 32.28  | 4.52 | 50.02 |
| chr20 | 37471877 | 37473012 | 1136 | 458  | 26   | 42.71  | 5.75 | 47.45 |
| chr20 | 37831645 | 37832526 | 882  | 461  | 20   | 36.22  | 5.75 | 46.99 |
| chr20 | 38695947 | 38696844 | 898  | 630  | 20   | 35.28  | 4.93 | 47.36 |
| chr20 | 39819420 | 39820590 | 1171 | 611  | 24   | 30.53  | 7.09 | 51.25 |
| chr20 | 39827020 | 39827918 | 899  | 246  | 20   | 35.22  | 4.52 | 47.23 |
| chr20 | 39861720 | 39862906 | 1187 | 717  | 26   | 39.87  | 4.52 | 46.65 |
| chr20 | 39887178 | 39888617 | 1440 | 630  | 30   | 42.49  | 6.16 | 47.36 |
| chr20 | 40410682 | 40411670 | 989  | 716  | 22   | 34.33  | 5.75 | 47.78 |
| chr20 | 40485839 | 40486590 | 752  | 547  | 18   | 35.4   | 5.34 | 47.5  |
| chr20 | 41166860 | 41168102 | 1243 | 704  | 26   | 35.77  | 4.83 | 47.12 |
| chr20 | 41829591 | 41830299 | 709  | 423  | 17   | 33.61  | 5.34 | 48.7  |
| chr20 | 42606142 | 42607378 | 1237 | 544  | 26   | 32.62  | 3.81 | 49.43 |
| chr20 | 43094731 | 43095784 | 1054 | 621  | 27   | 39.78  | 7.19 | 46.62 |
| chr20 | 43522644 | 43523961 | 1318 | 808  | 31   | 32.89  | 4.36 | 49.35 |
| chr20 | 43594817 | 43595999 | 1183 | 290  | 36   | 36.2   | 4.89 | 46.94 |
| chr20 | 43672407 | 43674290 | 1884 | 1441 | 33   | 34.46  | 3.42 | 47.78 |
| chr20 | 43823997 | 43825023 | 1027 | 739  | 21   | 31.94  | 4.08 | 49.76 |
| chr20 | 43894960 | 43896514 | 1555 | 1286 | 31   | 40.68  | 4.93 | 46.55 |
| chr20 | 44187116 | 44187978 | 863  | 598  | 20   | 37.38  | 4.93 | 46.58 |
| chr20 | 44212509 | 44213311 | 803  | 532  | 20   | 37.15  | 5.33 | 46.93 |
| chr20 | 44439021 | 44440187 | 1167 | 765  | 28   | 47.27  | 5.97 | 48.11 |

|       |          |          |      |      |      |         |      |       |
|-------|----------|----------|------|------|------|---------|------|-------|
| chr20 | 45091188 | 45092012 | 825  | 550  | 21   | 44.55   | 5.34 | 48.76 |
| chr20 | 45954869 | 45955918 | 1050 | 337  | 29   | 60.83   | 6.85 | 55.06 |
| chr20 | 46612970 | 46613820 | 851  | 240  | 21   | 42.74   | 5.34 | 47.45 |
| chr20 | 46903679 | 46904814 | 1136 | 667  | 24   | 34.6    | 5.75 | 47.74 |
| chr20 | 47862786 | 47863974 | 1189 | 720  | 34   | 71.79   | 7.8  | 57.14 |
| chr20 | 47873711 | 47874580 | 870  | 587  | 21   | 41.46   | 5.34 | 47    |
| chr20 | 48222894 | 48223915 | 1022 | 452  | 21   | 32.59   | 5.75 | 49.35 |
| chr20 | 48715784 | 48716647 | 864  | 434  | 20   | 33.89   | 6.54 | 48.6  |
| chr20 | 49550389 | 49552104 | 1716 | 372  | 40   | 31.49   | 3.71 | 49.91 |
| chr20 | 50100622 | 50101580 | 959  | 281  | 21   | 36      | 4.93 | 47.07 |
| chr20 | 50419489 | 50420365 | 877  | 282  | 19   | 32.26   | 5.75 | 49.99 |
| chr20 | 51729961 | 51730845 | 885  | 603  | 20   | 36.04   | 4.93 | 46.89 |
| chr20 | 51808074 | 51808809 | 736  | 191  | 18   | 36.46   | 4.93 | 47.14 |
| chr20 | 52609128 | 52609816 | 689  | 382  | 17   | 34.94   | 6.16 | 47.67 |
| chr20 | 52720554 | 52721386 | 833  | 455  | 19   | 31.04   | 4.19 | 50.55 |
| chr20 | 53510678 | 53511350 | 673  | 386  | 17   | 36.04   | 6.16 | 46.9  |
| chr20 | 53625306 | 53625958 | 653  | 366  | 21   | 59.04   | 7.39 | 52.34 |
| chr20 | 54213101 | 54213780 | 680  | 288  | 18   | 36.59   | 5.71 | 46.91 |
| chr20 | 55129568 | 55131456 | 1889 | 1335 | 35   | 32.04   | 4.23 | 49.77 |
| chr20 | 56048120 | 56049644 | 1525 | 836  | 39   | 33.98   | 3.53 | 48.58 |
| chr20 | 56641451 | 56642331 | 881  | 601  | 20   | 36.28   | 4.52 | 46.9  |
| chr20 | 56670594 | 56671582 | 989  | 471  | 20   | 30.36   | 5.34 | 51.62 |
| chr20 | 56985322 | 56986014 | 693  | 404  | 18   | 32.56   | 4.64 | 49.35 |
| chr20 | 57634410 | 57635823 | 1414 | 773  | 30   | 42.42   | 4.83 | 47.16 |
| chr20 | 57691297 | 57692246 | 950  | 623  | 20   | 32.37   | 5.75 | 49.78 |
| chr20 | 57833791 | 57834685 | 895  | 481  | 20   | 32.66   | 5.45 | 49.42 |
| chr20 | 58052258 | 58053210 | 953  | 276  | 21   | 36.34   | 6.16 | 47.04 |
| chr20 | 58504004 | 58504677 | 674  | 276  | 16   | 31.3    | 5.75 | 50.33 |
| chr20 | 58837571 | 58838616 | 1046 | 397  | 26   | 43.11   | 4.95 | 47.29 |
| chr20 | 61478961 | 61480371 | 1411 | 923  | 30   | 42.53   | 4.03 | 47.14 |
| chr20 | 61531602 | 61532699 | 1098 | 813  | 23   | 32.64   | 4.52 | 49.32 |
| chr20 | 62751141 | 62752096 | 956  | 689  | 21   | 36.17   | 4.93 | 46.95 |
| chr20 | 62917967 | 62919046 | 1080 | 565  | 25   | 36.99   | 8.37 | 46.95 |
| chr20 | 62925891 | 62927106 | 1216 | 433  | 27   | 42.36   | 4.93 | 47.06 |
| chr21 | 9770282  | 9772051  | 1770 | 1501 | 44   | 42.74   | 5.15 | 47.42 |
| chr21 | 9825309  | 9829569  | 4261 | 412  | 3518 | 1065.88 | 5.01 | 0     |
| chr21 | 9972324  | 9975068  | 2745 | 1531 | 102  | 47.21   | 4.18 | 47.74 |
| chr21 | 10413819 | 10417091 | 3273 | 1122 | 91   | 32.2    | 3.96 | 49.95 |
| chr21 | 10442199 | 10446397 | 4199 | 914  | 131  | 34.99   | 3.37 | 47.61 |
| chr21 | 10495181 | 10498103 | 2923 | 2208 | 93   | 38.43   | 5.05 | 46.35 |
| chr21 | 10501970 | 10505041 | 3072 | 1361 | 76   | 32.07   | 3.42 | 49.81 |
| chr21 | 10546134 | 10549263 | 3130 | 1756 | 90   | 51.33   | 4.86 | 51.54 |
| chr21 | 10946194 | 10947356 | 1163 | 541  | 30   | 38      | 4.36 | 46.5  |
| chr21 | 10965360 | 10966496 | 1137 | 824  | 27   | 42.48   | 5    | 47.26 |
| chr21 | 14405050 | 14406459 | 1410 | 688  | 38   | 70.58   | 6.69 | 54.95 |
| chr21 | 14469572 | 14470611 | 1040 | 537  | 24   | 39.79   | 8.63 | 46.64 |
| chr21 | 15132273 | 15133085 | 813  | 415  | 21   | 45.42   | 5.34 | 49.67 |
| chr21 | 15640234 | 15641286 | 1053 | 276  | 22   | 31.03   | 4.93 | 50.5  |
| chr21 | 15805493 | 15806645 | 1153 | 559  | 24   | 33.76   | 4.52 | 48.7  |
| chr21 | 16401599 | 16402284 | 686  | 265  | 16   | 30.55   | 4.11 | 51.28 |
| chr21 | 17251744 | 17252928 | 1185 | 734  | 29   | 44.72   | 5.16 | 48.86 |
| chr21 | 17570273 | 17571411 | 1139 | 577  | 24   | 34.45   | 5.75 | 47.75 |

|       |          |          |      |      |    |       |      |       |
|-------|----------|----------|------|------|----|-------|------|-------|
| chr21 | 17658294 | 17659105 | 812  | 289  | 19 | 32.28 | 5.71 | 50.06 |
| chr21 | 18120413 | 18121684 | 1272 | 598  | 27 | 39.38 | 7.39 | 46.86 |
| chr21 | 19229183 | 19230368 | 1186 | 599  | 28 | 35.87 | 5.48 | 47.03 |
| chr21 | 19308188 | 19309107 | 920  | 310  | 20 | 34.02 | 4.11 | 48.52 |
| chr21 | 19661922 | 19662769 | 848  | 245  | 19 | 33.92 | 4.93 | 48.7  |
| chr21 | 19743853 | 19745335 | 1483 | 1224 | 30 | 40.39 | 4.93 | 46.77 |
| chr21 | 20118698 | 20119602 | 905  | 559  | 19 | 30.73 | 4.52 | 50.98 |
| chr21 | 20804925 | 20806058 | 1134 | 614  | 25 | 38.68 | 5.75 | 46.16 |
| chr21 | 21094173 | 21095002 | 830  | 573  | 19 | 34.99 | 4.93 | 47.59 |
| chr21 | 21974475 | 21975356 | 882  | 490  | 20 | 36.22 | 4.93 | 46.99 |
| chr21 | 22086633 | 22087637 | 1005 | 485  | 21 | 33.48 | 5.34 | 48.6  |
| chr21 | 22354313 | 22355184 | 872  | 529  | 19 | 32.54 | 6.16 | 49.4  |
| chr21 | 22602644 | 22603315 | 672  | 382  | 17 | 36.11 | 5.75 | 46.95 |
| chr21 | 23039007 | 23039956 | 950  | 276  | 20 | 32.37 | 4.11 | 49.78 |
| chr21 | 23146568 | 23147717 | 1150 | 618  | 25 | 37.82 | 6.57 | 46.7  |
| chr21 | 23539833 | 23540667 | 835  | 490  | 19 | 34.69 | 4.93 | 47.81 |
| chr21 | 24160200 | 24161398 | 1199 | 561  | 32 | 50.59 | 5.48 | 51.78 |
| chr21 | 24546218 | 24546953 | 736  | 250  | 17 | 31.91 | 5.34 | 49.82 |
| chr21 | 24924903 | 24925734 | 832  | 614  | 18 | 30.19 | 4.07 | 51.69 |
| chr21 | 25447210 | 25448064 | 855  | 571  | 20 | 37.88 | 5.34 | 46.61 |
| chr21 | 25629611 | 25631070 | 1460 | 445  | 30 | 41.5  | 4.52 | 47.18 |
| chr21 | 25741022 | 25741885 | 864  | 280  | 21 | 41.86 | 6.16 | 47.09 |
| chr21 | 26524178 | 26525058 | 881  | 519  | 19 | 32.03 | 4.93 | 49.73 |
| chr21 | 27215686 | 27216554 | 869  | 451  | 20 | 37.01 | 6.57 | 46.95 |
| chr21 | 27264432 | 27265373 | 942  | 290  | 21 | 36.98 | 4.52 | 46.95 |
| chr21 | 28201684 | 28203054 | 1371 | 671  | 26 | 31.08 | 5.34 | 50.75 |
| chr21 | 28268107 | 28268906 | 800  | 296  | 18 | 32.44 | 4.11 | 49.55 |
| chr21 | 29217988 | 29218879 | 892  | 284  | 19 | 31.43 | 4.52 | 50    |
| chr21 | 29725999 | 29727030 | 1032 | 705  | 21 | 31.69 | 6.12 | 49.78 |
| chr21 | 29741591 | 29742408 | 818  | 404  | 18 | 31.39 | 4.93 | 50.18 |
| chr21 | 30064510 | 30065492 | 983  | 574  | 23 | 38.86 | 6.16 | 46.27 |
| chr21 | 30178060 | 30178888 | 829  | 289  | 20 | 30.09 | 4.79 | 51.54 |
| chr21 | 30324252 | 30325267 | 1016 | 347  | 28 | 37.99 | 4.55 | 46.46 |
| chr21 | 30333765 | 30334654 | 890  | 286  | 24 | 30.76 | 3.6  | 50.96 |
| chr21 | 30512078 | 30512906 | 829  | 326  | 19 | 30.22 | 5.21 | 51.75 |
| chr21 | 30590179 | 30591030 | 852  | 455  | 21 | 42.67 | 5.34 | 47.41 |
| chr21 | 31215791 | 31216863 | 1073 | 548  | 27 | 38.62 | 4.79 | 46.11 |
| chr21 | 31278793 | 31280357 | 1565 | 264  | 38 | 47.61 | 4.79 | 49.12 |
| chr21 | 31327767 | 31329546 | 1780 | 1190 | 35 | 41.27 | 5.34 | 46.93 |
| chr21 | 31426319 | 31427475 | 1157 | 703  | 24 | 33.56 | 6.57 | 48.56 |
| chr21 | 31833103 | 31834138 | 1036 | 450  | 22 | 31.88 | 6.16 | 49.76 |
| chr21 | 31855565 | 31856412 | 848  | 580  | 19 | 33.92 | 5.34 | 48.7  |
| chr21 | 33156993 | 33157975 | 983  | 288  | 36 | 49.72 | 8.18 | 51.72 |
| chr21 | 33185266 | 33186264 | 999  | 256  | 21 | 33.79 | 4.52 | 48.82 |
| chr21 | 33775676 | 33776725 | 1050 | 458  | 21 | 31.18 | 4.52 | 50.55 |
| chr21 | 33803733 | 33804610 | 878  | 355  | 19 | 32.2  | 4.93 | 49.92 |
| chr21 | 33929880 | 33930712 | 833  | 286  | 18 | 30.55 | 4.52 | 51.23 |
| chr21 | 34143475 | 34144827 | 1353 | 681  | 46 | 41.67 | 6.42 | 47.23 |
| chr21 | 35147479 | 35148361 | 883  | 244  | 21 | 30.74 | 3.77 | 50.98 |
| chr21 | 35197150 | 35198166 | 1017 | 337  | 21 | 30.05 | 4.28 | 51.47 |
| chr21 | 35422826 | 35423515 | 690  | 475  | 16 | 30.3  | 4.93 | 51.62 |
| chr21 | 36168390 | 36169388 | 999  | 285  | 22 | 33.79 | 4.52 | 48.82 |

|       |          |          |      |      |     |        |       |       |
|-------|----------|----------|------|------|-----|--------|-------|-------|
| chr21 | 36238749 | 36240013 | 1265 | 485  | 31  | 35.67  | 5.29  | 47.18 |
| chr21 | 36279901 | 36280789 | 889  | 272  | 20  | 35.81  | 4.52  | 47.08 |
| chr21 | 36613310 | 36614267 | 958  | 394  | 21  | 36.06  | 4.52  | 46.97 |
| chr21 | 37619728 | 37620683 | 956  | 520  | 20  | 32.05  | 5.75  | 49.81 |
| chr21 | 37743311 | 37744672 | 1362 | 715  | 30  | 46.59  | 6.57  | 47.63 |
| chr21 | 37884185 | 37885211 | 1027 | 674  | 23  | 32.12  | 4.19  | 49.74 |
| chr21 | 38301951 | 38302929 | 979  | 626  | 23  | 39.1   | 5.75  | 46.38 |
| chr21 | 38553260 | 38554765 | 1506 | 1095 | 35  | 46.75  | 4.84  | 47.35 |
| chr21 | 39786470 | 39787274 | 805  | 521  | 18  | 32.14  | 4.93  | 49.83 |
| chr21 | 39907962 | 39908939 | 978  | 513  | 22  | 34.93  | 4.93  | 47.58 |
| chr21 | 40113562 | 40115837 | 2276 | 1599 | 82  | 216.15 | 22.15 | 16.67 |
| chr21 | 40889483 | 40891122 | 1640 | 720  | 36  | 45.28  | 4.57  | 49.32 |
| chr21 | 41286647 | 41287701 | 1055 | 283  | 29  | 62     | 6.57  | 53.94 |
| chr21 | 41407334 | 41408558 | 1225 | 552  | 27  | 41.86  | 5.75  | 47.14 |
| chr21 | 41752656 | 41753477 | 822  | 539  | 22  | 44.77  | 6.98  | 48.85 |
| chr21 | 43160856 | 43162511 | 1656 | 266  | 36  | 50.91  | 5.34  | 51.76 |
| chr21 | 43299566 | 43300357 | 792  | 469  | 20  | 32.38  | 5.48  | 49.73 |
| chr21 | 44386329 | 44386826 | 498  | 249  | 16  | 54.21  | 6.57  | 53.5  |
| chr21 | 45449943 | 45450980 | 1038 | 670  | 21  | 31.78  | 5.75  | 49.85 |
| chr21 | 45659300 | 45660149 | 850  | 560  | 20  | 36.54  | 6.37  | 46.96 |
| chr21 | 45720184 | 45721874 | 1691 | 1202 | 36  | 49.12  | 4.93  | 50.72 |
| chr21 | 46305440 | 46306332 | 893  | 413  | 20  | 35.57  | 5.34  | 47.15 |
| chr21 | 47400317 | 47401442 | 1126 | 521  | 31  | 51.42  | 6.16  | 51.63 |
| chr21 | 47699352 | 47700194 | 843  | 255  | 20  | 33.45  | 3.72  | 48.62 |
| chr21 | 47981810 | 47982539 | 730  | 403  | 17  | 32.28  | 4.52  | 50.02 |
| chr21 | 48036646 | 48038114 | 1469 | 944  | 32  | 48.88  | 5.34  | 50.48 |
| chr22 | 16144258 | 16146699 | 2442 | 888  | 70  | 64.97  | 7.38  | 54.7  |
| chr22 | 16185396 | 16186889 | 1494 | 578  | 43  | 34.1   | 4.55  | 48.14 |
| chr22 | 16662779 | 16663500 | 722  | 446  | 19  | 41.23  | 6.45  | 46.77 |
| chr22 | 16684336 | 16685237 | 902  | 260  | 19  | 30.53  | 4.08  | 51.26 |
| chr22 | 16863437 | 16864776 | 1340 | 784  | 49  | 59.19  | 5.94  | 53.35 |
| chr22 | 16864866 | 16865851 | 986  | 275  | 24  | 34.64  | 4.64  | 47.73 |
| chr22 | 17013973 | 17015024 | 1052 | 714  | 27  | 52.49  | 6.57  | 50.71 |
| chr22 | 17019440 | 17020655 | 1216 | 569  | 24  | 30.8   | 5.75  | 51.01 |
| chr22 | 17371064 | 17372491 | 1428 | 646  | 50  | 38.69  | 4.64  | 46.21 |
| chr22 | 18439121 | 18439987 | 867  | 527  | 20  | 36.11  | 6.04  | 46.94 |
| chr22 | 19419116 | 19420408 | 1293 | 774  | 27  | 34.19  | 5     | 48    |
| chr22 | 20104318 | 20105175 | 858  | 349  | 27  | 36.14  | 5.53  | 46.98 |
| chr22 | 20325246 | 20326926 | 1681 | 1215 | 145 | 37.2   | 3.88  | 46.92 |
| chr22 | 21354962 | 21357743 | 2782 | 1253 | 67  | 31.88  | 3.91  | 49.76 |
| chr22 | 21368068 | 21368966 | 899  | 542  | 21  | 35.35  | 5.71  | 47.46 |
| chr22 | 21671463 | 21672440 | 978  | 267  | 21  | 32.07  | 5.84  | 49.81 |
| chr22 | 22539757 | 22540605 | 849  | 505  | 21  | 39.14  | 4.62  | 46.29 |
| chr22 | 22710385 | 22711738 | 1354 | 761  | 28  | 39.11  | 4.93  | 46.27 |
| chr22 | 22733731 | 22734863 | 1133 | 281  | 29  | 42.74  | 5.14  | 47.57 |
| chr22 | 22927403 | 22928454 | 1052 | 562  | 22  | 31.08  | 6.57  | 50.76 |
| chr22 | 23182176 | 23183466 | 1291 | 720  | 33  | 31.04  | 5.09  | 50.53 |
| chr22 | 23312991 | 23314275 | 1285 | 663  | 26  | 34.92  | 5.34  | 47.58 |
| chr22 | 24643672 | 24644375 | 704  | 452  | 19  | 43.64  | 6.98  | 47.86 |
| chr22 | 24763052 | 24764025 | 974  | 538  | 23  | 33.22  | 5.16  | 49.14 |
| chr22 | 25560001 | 25560989 | 989  | 436  | 21  | 34.33  | 6.16  | 47.78 |
| chr22 | 26527233 | 26528356 | 1124 | 384  | 28  | 52.28  | 6.16  | 51.15 |

|       |          |          |      |      |    |       |      |       |
|-------|----------|----------|------|------|----|-------|------|-------|
| chr22 | 26794261 | 26795505 | 1245 | 479  | 26 | 36.86 | 5.75 | 46.77 |
| chr22 | 26809643 | 26810489 | 847  | 571  | 19 | 33.6  | 4.08 | 48.69 |
| chr22 | 27329094 | 27330876 | 1783 | 290  | 31 | 34.4  | 4.11 | 47.75 |
| chr22 | 27757324 | 27758065 | 742  | 256  | 17 | 31.55 | 5.34 | 49.94 |
| chr22 | 28133363 | 28134241 | 879  | 278  | 19 | 32.14 | 5.75 | 49.88 |
| chr22 | 29034359 | 29035071 | 713  | 265  | 18 | 34.28 | 5.71 | 47.83 |
| chr22 | 29197128 | 29198590 | 1463 | 289  | 35 | 57.6  | 4.93 | 54.13 |
| chr22 | 29275161 | 29276075 | 915  | 687  | 23 | 43.1  | 4.93 | 47.16 |
| chr22 | 29646086 | 29646767 | 682  | 391  | 16 | 30.8  | 6.16 | 51    |
| chr22 | 30337144 | 30337972 | 829  | 599  | 19 | 35.05 | 6.16 | 47.49 |
| chr22 | 30404468 | 30405425 | 958  | 280  | 24 | 42.92 | 5.58 | 47.44 |
| chr22 | 30409627 | 30410574 | 948  | 288  | 21 | 36.63 | 5.34 | 46.89 |
| chr22 | 30489561 | 30490628 | 1068 | 540  | 23 | 33.75 | 7.75 | 48.68 |
| chr22 | 31829476 | 31830623 | 1148 | 489  | 23 | 30.26 | 6.16 | 51.68 |
| chr22 | 32024257 | 32025132 | 876  | 283  | 20 | 36.58 | 5.34 | 46.91 |
| chr22 | 32046872 | 32048004 | 1133 | 787  | 28 | 42.35 | 5.77 | 47.09 |
| chr22 | 33340000 | 33340427 | 428  | 214  | 17 | 72.06 | 6.33 | 56.84 |
| chr22 | 33588768 | 33589766 | 999  | 719  | 27 | 56.28 | 4.93 | 53.99 |
| chr22 | 34533613 | 34534388 | 776  | 288  | 21 | 48.22 | 6.98 | 49.56 |
| chr22 | 34954921 | 34955705 | 785  | 476  | 18 | 33.33 | 5.34 | 48.72 |
| chr22 | 34966897 | 34967892 | 996  | 586  | 21 | 33.95 | 6.98 | 48.63 |
| chr22 | 35427876 | 35428847 | 972  | 699  | 22 | 35.27 | 6.16 | 47.3  |
| chr22 | 36573952 | 36574718 | 767  | 477  | 17 | 30.07 | 5.75 | 51.5  |
| chr22 | 36644623 | 36646165 | 1543 | 1139 | 35 | 52.97 | 5.75 | 50.49 |
| chr22 | 36901036 | 36902665 | 1630 | 1046 | 32 | 40.86 | 4.93 | 46.35 |
| chr22 | 37233080 | 37233740 | 661  | 286  | 16 | 32.14 | 6.16 | 49.82 |
| chr22 | 37447390 | 37448346 | 957  | 580  | 22 | 36.11 | 4.52 | 46.95 |
| chr22 | 38240536 | 38241447 | 912  | 416  | 25 | 34.57 | 4.01 | 47.73 |
| chr22 | 38257808 | 38260063 | 2256 | 1677 | 46 | 37.93 | 5.48 | 46.59 |
| chr22 | 38492169 | 38492966 | 798  | 514  | 18 | 32.55 | 5.34 | 49.31 |
| chr22 | 38945437 | 38946219 | 783  | 361  | 21 | 47.67 | 6.16 | 49.25 |
| chr22 | 38992336 | 38993269 | 934  | 541  | 20 | 33.24 | 5.34 | 48.96 |
| chr22 | 39902729 | 39903312 | 584  | 314  | 21 | 66.39 | 8.22 | 55    |
| chr22 | 41809826 | 41811118 | 1293 | 748  | 30 | 32.14 | 5.07 | 49.84 |
| chr22 | 42295745 | 42297391 | 1647 | 266  | 33 | 40.09 | 4.11 | 46.58 |
| chr22 | 42486670 | 42487873 | 1204 | 709  | 29 | 51.63 | 7.39 | 51.3  |
| chr22 | 42611200 | 42612208 | 1009 | 269  | 26 | 50.74 | 5.75 | 51.46 |
| chr22 | 43175421 | 43177047 | 1627 | 510  | 34 | 31.31 | 4.79 | 50.32 |
| chr22 | 43428486 | 43429772 | 1287 | 550  | 26 | 34.83 | 5.34 | 47.53 |
| chr22 | 45441398 | 45442211 | 814  | 433  | 18 | 31.62 | 4.93 | 49.94 |
| chr22 | 45559051 | 45560457 | 1407 | 713  | 39 | 44.57 | 4.28 | 48.82 |
| chr22 | 45617136 | 45618543 | 1408 | 835  | 33 | 52.31 | 5.34 | 50.77 |
| chr22 | 45640254 | 45641079 | 826  | 540  | 18 | 30.94 | 4.11 | 50.56 |
| chr22 | 46105418 | 46106463 | 1046 | 417  | 23 | 34.9  | 5.71 | 47.61 |
| chr22 | 46205509 | 46206552 | 1044 | 439  | 21 | 31.48 | 4.93 | 49.97 |
| chr22 | 46518982 | 46519852 | 871  | 291  | 19 | 32.59 | 5.34 | 49.42 |
| chr22 | 47468902 | 47469494 | 593  | 326  | 15 | 32.02 | 5.75 | 49.77 |
| chr22 | 48264909 | 48265793 | 885  | 327  | 25 | 54.97 | 7.8  | 53.62 |
| chr22 | 48407372 | 48408207 | 836  | 462  | 18 | 30.38 | 4.11 | 51.65 |
| chr22 | 49163652 | 49164901 | 1250 | 610  | 31 | 57.71 | 5.75 | 53.89 |
| chr22 | 49359736 | 49360730 | 995  | 705  | 21 | 34.01 | 5.34 | 48.54 |
| chr22 | 50769717 | 50771317 | 1601 | 1137 | 36 | 45.45 | 5.58 | 49.74 |

|       |          |          |      |      |    |       |      |       |
|-------|----------|----------|------|------|----|-------|------|-------|
| chr22 | 50888082 | 50888942 | 861  | 630  | 19 | 33.16 | 4.52 | 49.11 |
| chr3  | 110820   | 111934   | 1115 | 433  | 25 | 39.72 | 5.34 | 46.55 |
| chr3  | 215295   | 216404   | 1110 | 609  | 25 | 40    | 5.34 | 46.57 |
| chr3  | 251695   | 253945   | 2251 | 1699 | 48 | 44.03 | 4.79 | 48.09 |
| chr3  | 496868   | 497656   | 789  | 502  | 20 | 37.5  | 5.27 | 46    |
| chr3  | 605514   | 606573   | 1060 | 486  | 22 | 30.69 | 5.34 | 51.01 |
| chr3  | 640103   | 642318   | 2216 | 619  | 55 | 36.69 | 3.42 | 46.96 |
| chr3  | 903957   | 904801   | 845  | 439  | 20 | 38.52 | 6.57 | 46.25 |
| chr3  | 931267   | 932218   | 952  | 289  | 24 | 34.31 | 4.79 | 47.83 |
| chr3  | 1189918  | 1190776  | 859  | 268  | 20 | 30.35 | 3.92 | 51.59 |
| chr3  | 1299919  | 1301460  | 1542 | 276  | 30 | 37.66 | 4.52 | 46.03 |
| chr3  | 1306713  | 1308061  | 1349 | 778  | 31 | 37.84 | 5.82 | 46.72 |
| chr3  | 1377045  | 1377779  | 735  | 450  | 18 | 36.53 | 6.16 | 46.94 |
| chr3  | 1913084  | 1913593  | 510  | 255  | 16 | 48.45 | 6.57 | 49.14 |
| chr3  | 2382394  | 2384005  | 1612 | 907  | 37 | 57.35 | 4.93 | 53.77 |
| chr3  | 2432259  | 2433127  | 869  | 291  | 19 | 32.71 | 5.75 | 49.41 |
| chr3  | 3185741  | 3187725  | 1985 | 268  | 44 | 43.43 | 4.11 | 47.94 |
| chr3  | 3459232  | 3459950  | 719  | 451  | 18 | 37.62 | 4.93 | 45.78 |
| chr3  | 4308277  | 4309693  | 1417 | 1142 | 35 | 60.45 | 4.52 | 55.84 |
| chr3  | 4496590  | 4497623  | 1034 | 758  | 23 | 35.97 | 5.75 | 47.03 |
| chr3  | 5180044  | 5182253  | 2210 | 591  | 44 | 34.47 | 4.82 | 47.77 |
| chr3  | 5336982  | 5337690  | 709  | 222  | 17 | 33.61 | 4.93 | 48.7  |
| chr3  | 5491620  | 5493128  | 1509 | 1223 | 32 | 35.49 | 4.24 | 47.44 |
| chr3  | 5919875  | 5920603  | 729  | 243  | 17 | 32.34 | 3.7  | 49.9  |
| chr3  | 7658456  | 7659526  | 1071 | 597  | 21 | 30.16 | 5.75 | 51.62 |
| chr3  | 8323234  | 8324175  | 942  | 270  | 23 | 41.36 | 5.75 | 46.92 |
| chr3  | 9544915  | 9546002  | 1088 | 617  | 24 | 37.11 | 5.34 | 47    |
| chr3  | 10197095 | 10197998 | 904  | 684  | 19 | 30.79 | 4.52 | 50.91 |
| chr3  | 10406430 | 10407254 | 825  | 355  | 18 | 30.99 | 4.52 | 50.47 |
| chr3  | 11129377 | 11130252 | 876  | 280  | 20 | 36.58 | 4.93 | 46.91 |
| chr3  | 11152639 | 11153683 | 1045 | 291  | 24 | 39.5  | 4.93 | 47.08 |
| chr3  | 11662888 | 11664223 | 1336 | 518  | 31 | 31.99 | 4.67 | 49.84 |
| chr3  | 11793334 | 11793991 | 658  | 385  | 16 | 32.34 | 6.16 | 49.93 |
| chr3  | 12401391 | 12403727 | 2337 | 953  | 59 | 45    | 3.53 | 48.96 |
| chr3  | 12405461 | 12408978 | 3518 | 603  | 83 | 54.6  | 3.08 | 53.89 |
| chr3  | 12432333 | 12433521 | 1189 | 505  | 28 | 35.71 | 4.79 | 47.24 |
| chr3  | 12923652 | 12924459 | 808  | 556  | 19 | 36.36 | 6.16 | 47.14 |
| chr3  | 13531320 | 13532031 | 712  | 433  | 18 | 38.11 | 5.75 | 46.4  |
| chr3  | 14070253 | 14071160 | 908  | 580  | 22 | 39.03 | 6.98 | 46.21 |
| chr3  | 14773823 | 14774781 | 959  | 252  | 22 | 36    | 4.52 | 47.07 |
| chr3  | 15371436 | 15373139 | 1704 | 234  | 34 | 41.1  | 4.93 | 46.34 |
| chr3  | 15641471 | 15643955 | 2485 | 562  | 64 | 47.98 | 4.21 | 49.42 |
| chr3  | 15675797 | 15676637 | 841  | 270  | 24 | 44.19 | 6.42 | 47.99 |
| chr3  | 15749506 | 15751853 | 2348 | 357  | 46 | 33.75 | 3.95 | 48.71 |
| chr3  | 15776172 | 15777706 | 1535 | 572  | 31 | 39.38 | 3.98 | 46.91 |
| chr3  | 16079757 | 16081998 | 2242 | 1532 | 50 | 70.55 | 6.93 | 54.46 |
| chr3  | 16327059 | 16327984 | 926  | 242  | 20 | 30.94 | 4.67 | 50.55 |
| chr3  | 16441696 | 16442445 | 750  | 291  | 17 | 30.21 | 6.45 | 51.7  |
| chr3  | 16859213 | 16859885 | 673  | 402  | 16 | 31.37 | 5.75 | 50.2  |
| chr3  | 16888563 | 16889620 | 1058 | 768  | 25 | 38.24 | 4.19 | 46.27 |
| chr3  | 16931441 | 16932756 | 1316 | 636  | 29 | 32.67 | 4.11 | 49.43 |
| chr3  | 17517548 | 17518505 | 958  | 642  | 21 | 33.15 | 4.28 | 49.17 |

|      |          |          |      |      |    |       |      |       |
|------|----------|----------|------|------|----|-------|------|-------|
| chr3 | 17802785 | 17804592 | 1808 | 1203 | 46 | 57.55 | 4.7  | 53.83 |
| chr3 | 18234898 | 18236367 | 1470 | 1203 | 36 | 38.02 | 5.29 | 46.41 |
| chr3 | 18389015 | 18389842 | 828  | 251  | 18 | 30.83 | 4.52 | 50.88 |
| chr3 | 18423809 | 18424647 | 839  | 533  | 18 | 30.22 | 5.34 | 51.69 |
| chr3 | 18889322 | 18890180 | 859  | 370  | 19 | 33.28 | 4.93 | 48.91 |
| chr3 | 18939332 | 18940421 | 1090 | 486  | 24 | 32.62 | 4.57 | 49.42 |
| chr3 | 19146236 | 19147408 | 1173 | 601  | 29 | 53.63 | 6.57 | 51.86 |
| chr3 | 19213423 | 19214567 | 1145 | 493  | 27 | 46.47 | 6.98 | 48.34 |
| chr3 | 19657566 | 19658226 | 661  | 265  | 16 | 32.14 | 5.34 | 49.82 |
| chr3 | 19985572 | 19986457 | 886  | 695  | 21 | 31.08 | 3.81 | 50.76 |
| chr3 | 19987664 | 19989182 | 1519 | 615  | 34 | 42.36 | 5.58 | 47.01 |
| chr3 | 20122618 | 20123467 | 850  | 562  | 19 | 30.07 | 4.57 | 51.53 |
| chr3 | 21163372 | 21165712 | 2341 | 1992 | 53 | 78.18 | 5.75 | 56.25 |
| chr3 | 21393537 | 21394443 | 907  | 378  | 22 | 39.09 | 4.93 | 46.3  |
| chr3 | 21829599 | 21831116 | 1518 | 1015 | 34 | 36.18 | 3.77 | 46.9  |
| chr3 | 21848723 | 21849659 | 937  | 283  | 22 | 37.27 | 4.52 | 46.57 |
| chr3 | 22699114 | 22699849 | 736  | 434  | 18 | 36.46 | 4.93 | 47.14 |
| chr3 | 22988025 | 22989640 | 1616 | 271  | 38 | 61.34 | 4.93 | 53.97 |
| chr3 | 23323245 | 23323884 | 640  | 349  | 19 | 39.01 | 5.82 | 46.12 |
| chr3 | 23475325 | 23476339 | 1015 | 450  | 21 | 32.95 | 5.34 | 49.29 |
| chr3 | 24660684 | 24661699 | 1016 | 639  | 21 | 32.9  | 4.93 | 49.32 |
| chr3 | 24669037 | 24669791 | 755  | 475  | 17 | 30.77 | 6.16 | 50.95 |
| chr3 | 25482903 | 25483765 | 863  | 597  | 21 | 41.93 | 4.93 | 46.96 |
| chr3 | 25708759 | 25709268 | 510  | 255  | 15 | 37.08 | 5.46 | 46.95 |
| chr3 | 25723199 | 25725018 | 1820 | 527  | 37 | 40.31 | 5.71 | 46.89 |
| chr3 | 25889286 | 25890079 | 794  | 392  | 20 | 41.94 | 4.52 | 46.99 |
| chr3 | 26090405 | 26091689 | 1285 | 564  | 29 | 46.77 | 5.75 | 47.38 |
| chr3 | 26172880 | 26174274 | 1395 | 559  | 29 | 40.9  | 5.75 | 46.35 |
| chr3 | 26753321 | 26754288 | 968  | 423  | 23 | 39.75 | 6.98 | 46.68 |
| chr3 | 27427030 | 27428431 | 1402 | 607  | 32 | 38.57 | 4.11 | 46.22 |
| chr3 | 27884875 | 27885648 | 774  | 509  | 18 | 34.01 | 4.93 | 48.55 |
| chr3 | 28168640 | 28169556 | 917  | 687  | 20 | 32.01 | 4.72 | 49.76 |
| chr3 | 28315226 | 28316074 | 849  | 246  | 20 | 36.6  | 4.38 | 46.87 |
| chr3 | 28404516 | 28405302 | 787  | 416  | 20 | 42.43 | 6.57 | 47.3  |
| chr3 | 28563526 | 28564530 | 1005 | 777  | 23 | 34.54 | 5.06 | 47.75 |
| chr3 | 28765690 | 28767068 | 1379 | 421  | 29 | 36.48 | 4.57 | 47.05 |
| chr3 | 29324682 | 29325438 | 757  | 423  | 17 | 30.65 | 4.11 | 51.07 |
| chr3 | 29933521 | 29934460 | 940  | 254  | 23 | 41.48 | 5.75 | 47.04 |
| chr3 | 30323593 | 30325052 | 1460 | 947  | 31 | 45.37 | 4.11 | 49.53 |
| chr3 | 30813343 | 30813927 | 585  | 288  | 15 | 32.59 | 5.34 | 49.35 |
| chr3 | 30815402 | 30816320 | 919  | 280  | 21 | 38.35 | 4.93 | 46.36 |
| chr3 | 30847885 | 30848782 | 898  | 277  | 20 | 35.28 | 4.52 | 47.36 |
| chr3 | 30896037 | 30896913 | 877  | 352  | 19 | 32.26 | 5.34 | 49.99 |
| chr3 | 31378713 | 31380614 | 1902 | 882  | 50 | 83.31 | 6.13 | 51.11 |
| chr3 | 32078938 | 32080487 | 1550 | 1042 | 36 | 56.73 | 5.75 | 53.4  |
| chr3 | 32815867 | 32816757 | 891  | 666  | 19 | 31.48 | 5.34 | 49.85 |
| chr3 | 33478930 | 33480066 | 1137 | 445  | 30 | 32.04 | 4.73 | 49.75 |
| chr3 | 33699531 | 33701096 | 1566 | 725  | 39 | 42.08 | 5.55 | 46.94 |
| chr3 | 34097959 | 34099297 | 1339 | 857  | 31 | 38.36 | 3.77 | 46.41 |
| chr3 | 34484870 | 34486100 | 1231 | 668  | 24 | 30.13 | 5.75 | 51.66 |
| chr3 | 34515658 | 34516651 | 994  | 562  | 20 | 30.11 | 5.34 | 51.59 |
| chr3 | 34600423 | 34601381 | 959  | 409  | 20 | 31.9  | 4.52 | 49.83 |

|      |          |          |      |      |     |       |      |       |
|------|----------|----------|------|------|-----|-------|------|-------|
| chr3 | 34718453 | 34719588 | 1136 | 573  | 25  | 34.64 | 5.39 | 47.65 |
| chr3 | 34853186 | 34854231 | 1046 | 806  | 21  | 31.38 | 4.52 | 50.17 |
| chr3 | 34856070 | 34856612 | 543  | 271  | 17  | 43.16 | 6.32 | 47.42 |
| chr3 | 35037391 | 35038671 | 1281 | 569  | 26  | 35.11 | 7.8  | 47.42 |
| chr3 | 35510681 | 35511710 | 1030 | 742  | 21  | 32.18 | 6.16 | 49.95 |
| chr3 | 35692774 | 35693808 | 1035 | 715  | 21  | 31.93 | 4.11 | 49.77 |
| chr3 | 35948957 | 35949969 | 1013 | 438  | 22  | 33.06 | 6.16 | 49.12 |
| chr3 | 36083273 | 36084219 | 947  | 698  | 20  | 32.53 | 4.52 | 49.43 |
| chr3 | 36256362 | 36257135 | 774  | 277  | 18  | 34.01 | 6.16 | 48.55 |
| chr3 | 36346980 | 36347793 | 814  | 270  | 20  | 40.56 | 4.93 | 46.89 |
| chr3 | 37375218 | 37376517 | 1300 | 1029 | 30  | 36.9  | 4.11 | 46.71 |
| chr3 | 37417124 | 37418755 | 1632 | 1020 | 38  | 30.97 | 4.06 | 50.45 |
| chr3 | 39059172 | 39060076 | 905  | 389  | 20  | 30.97 | 5.33 | 50.44 |
| chr3 | 39360594 | 39362705 | 2112 | 591  | 45  | 32.68 | 4.98 | 49.37 |
| chr3 | 39520282 | 39521111 | 830  | 593  | 18  | 30.71 | 4.52 | 50.99 |
| chr3 | 39817740 | 39818685 | 946  | 250  | 21  | 31.48 | 4.09 | 49.89 |
| chr3 | 40282360 | 40283265 | 906  | 527  | 20  | 32.62 | 5.9  | 49.44 |
| chr3 | 40517454 | 40518664 | 1211 | 717  | 26  | 33.89 | 4.95 | 48.58 |
| chr3 | 40977414 | 40978224 | 811  | 581  | 20  | 40.76 | 6.57 | 46.5  |
| chr3 | 41035805 | 41037233 | 1429 | 284  | 30  | 43.05 | 5.34 | 47.34 |
| chr3 | 41186746 | 41187471 | 726  | 243  | 17  | 32.53 | 4.93 | 49.39 |
| chr3 | 41405935 | 41406900 | 966  | 488  | 20  | 31.53 | 4.52 | 49.91 |
| chr3 | 41744475 | 41745569 | 1095 | 575  | 25  | 40.85 | 4.93 | 46.35 |
| chr3 | 41799212 | 41800124 | 913  | 652  | 20  | 34.41 | 4.52 | 47.76 |
| chr3 | 41841975 | 41842881 | 907  | 616  | 22  | 38.67 | 7.75 | 46.12 |
| chr3 | 42321605 | 42322359 | 755  | 382  | 17  | 30.77 | 5.75 | 50.95 |
| chr3 | 42412026 | 42412985 | 960  | 465  | 20  | 31.84 | 6.57 | 49.73 |
| chr3 | 42610237 | 42611194 | 958  | 703  | 21  | 36.06 | 4.11 | 46.97 |
| chr3 | 43309611 | 43310514 | 904  | 377  | 19  | 30.79 | 4.93 | 50.91 |
| chr3 | 43710503 | 43711422 | 920  | 574  | 20  | 34.02 | 5.34 | 48.52 |
| chr3 | 43975237 | 43976215 | 979  | 544  | 24  | 43.5  | 5.34 | 48.12 |
| chr3 | 44148661 | 44149643 | 983  | 746  | 21  | 30.64 | 4.19 | 51.16 |
| chr3 | 44348089 | 44349442 | 1354 | 1170 | 32  | 49.28 | 3.81 | 50.96 |
| chr3 | 44363589 | 44364513 | 925  | 466  | 21  | 37.99 | 4.93 | 46.41 |
| chr3 | 44841645 | 44843359 | 1715 | 861  | 41  | 68.32 | 5.75 | 54.48 |
| chr3 | 45268062 | 45269274 | 1213 | 611  | 25  | 34.62 | 6.57 | 47.82 |
| chr3 | 45323945 | 45324689 | 745  | 281  | 17  | 31.37 | 5.34 | 50.22 |
| chr3 | 45582998 | 45584004 | 1007 | 316  | 23  | 31.42 | 5.16 | 50.13 |
| chr3 | 45882299 | 45883411 | 1113 | 495  | 25  | 39.83 | 6.16 | 46.65 |
| chr3 | 45888187 | 45889134 | 948  | 616  | 20  | 32.48 | 6.57 | 49.47 |
| chr3 | 46110198 | 46111497 | 1300 | 523  | 26  | 34.22 | 4.93 | 47.93 |
| chr3 | 46382974 | 46384005 | 1032 | 476  | 24  | 40.26 | 6.98 | 46.78 |
| chr3 | 46419150 | 46420859 | 1710 | 1084 | 40  | 62.36 | 6.45 | 54.98 |
| chr3 | 46769844 | 46770607 | 764  | 421  | 18  | 34.64 | 5.34 | 47.73 |
| chr3 | 47078843 | 47079507 | 665  | 287  | 19  | 34.42 | 5.21 | 47.81 |
| chr3 | 47161540 | 47166279 | 4740 | 4114 | 122 | 35.98 | 3.54 | 47.07 |
| chr3 | 47338701 | 47339536 | 836  | 552  | 19  | 31.41 | 5    | 50.17 |
| chr3 | 48180037 | 48180767 | 731  | 313  | 17  | 32.22 | 5.75 | 49.98 |
| chr3 | 48214130 | 48215319 | 1190 | 631  | 27  | 41.73 | 5.18 | 47.23 |
| chr3 | 48565141 | 48566334 | 1194 | 529  | 24  | 31.8  | 5.75 | 49.8  |
| chr3 | 48790462 | 48791289 | 828  | 538  | 19  | 35.11 | 5.75 | 47.37 |
| chr3 | 48884461 | 48886076 | 1616 | 551  | 37  | 30.13 | 3.84 | 51.66 |



|      |          |          |      |      |    |       |      |       |
|------|----------|----------|------|------|----|-------|------|-------|
| chr3 | 49014343 | 49015572 | 1230 | 551  | 26 | 32.96 | 4.57 | 49.29 |
| chr3 | 49502865 | 49503754 | 890  | 534  | 23 | 44.32 | 6.12 | 48.25 |
| chr3 | 49877327 | 49878081 | 755  | 483  | 17 | 30.77 | 4.52 | 50.95 |
| chr3 | 50061326 | 50062351 | 1026 | 486  | 21 | 32.38 | 6.98 | 49.71 |
| chr3 | 50226027 | 50226826 | 800  | 461  | 18 | 32.44 | 5.75 | 49.55 |
| chr3 | 50328261 | 50330064 | 1804 | 1041 | 42 | 48.97 | 5.14 | 50.43 |
| chr3 | 50830459 | 50831298 | 840  | 266  | 21 | 43.5  | 4.52 | 48.04 |
| chr3 | 51434814 | 51435584 | 771  | 274  | 19 | 34.42 | 5.28 | 47.8  |
| chr3 | 51819079 | 51820251 | 1173 | 562  | 25 | 36.62 | 4.93 | 46.95 |
| chr3 | 51978915 | 51979654 | 740  | 450  | 18 | 35.25 | 6.04 | 47.28 |
| chr3 | 52001744 | 52002292 | 549  | 274  | 15 | 37.66 | 6.16 | 46.06 |
| chr3 | 52009535 | 52010940 | 1406 | 661  | 37 | 31.94 | 4.21 | 49.76 |
| chr3 | 52613879 | 52614780 | 902  | 243  | 22 | 33.99 | 4.47 | 48.55 |
| chr3 | 52662450 | 52663376 | 927  | 386  | 29 | 38.46 | 4.48 | 46.39 |
| chr3 | 52702282 | 52703822 | 1541 | 271  | 38 | 64.81 | 5.28 | 53.48 |
| chr3 | 53363176 | 53364392 | 1217 | 681  | 28 | 31.19 | 4.89 | 50.51 |
| chr3 | 53503718 | 53504773 | 1056 | 486  | 21 | 30.5  | 6.12 | 51.28 |
| chr3 | 53518624 | 53519605 | 982  | 291  | 20 | 30.71 | 4.11 | 51.01 |
| chr3 | 53564896 | 53565854 | 959  | 623  | 20 | 31.9  | 4.52 | 49.83 |
| chr3 | 53744125 | 53745027 | 903  | 627  | 21 | 39.34 | 6.16 | 46.61 |
| chr3 | 55107962 | 55108804 | 843  | 280  | 19 | 34.21 | 5.75 | 47.87 |
| chr3 | 55278202 | 55279031 | 830  | 286  | 20 | 39.49 | 4.52 | 47    |
| chr3 | 55433903 | 55434707 | 805  | 527  | 18 | 32.14 | 4.52 | 49.83 |
| chr3 | 55704861 | 55705714 | 854  | 576  | 19 | 33.57 | 7.39 | 48.6  |
| chr3 | 56093236 | 56093841 | 606  | 324  | 15 | 31.13 | 5.75 | 50.65 |
| chr3 | 56424608 | 56425899 | 1292 | 498  | 29 | 33.85 | 5.82 | 48.72 |
| chr3 | 56695775 | 56697738 | 1964 | 758  | 50 | 64.38 | 4.41 | 54.69 |
| chr3 | 57173961 | 57174894 | 934  | 647  | 22 | 37.45 | 6.57 | 46.33 |
| chr3 | 57575484 | 57577372 | 1889 | 699  | 44 | 34.09 | 3.81 | 48.18 |
| chr3 | 58124002 | 58124795 | 794  | 527  | 19 | 37.25 | 4.93 | 46.46 |
| chr3 | 58223316 | 58224524 | 1209 | 515  | 27 | 30.6  | 5.76 | 51.21 |
| chr3 | 58319114 | 58321618 | 2505 | 573  | 60 | 33.74 | 3.32 | 48.65 |
| chr3 | 58888963 | 58889812 | 850  | 382  | 20 | 34.15 | 4.95 | 47.99 |
| chr3 | 59277862 | 59278467 | 606  | 345  | 15 | 31.13 | 5.34 | 50.65 |
| chr3 | 59795754 | 59796618 | 865  | 577  | 19 | 32.93 | 5.34 | 49.39 |
| chr3 | 61921672 | 61922480 | 809  | 398  | 19 | 36.29 | 5.34 | 46.98 |
| chr3 | 62174110 | 62175256 | 1147 | 653  | 27 | 46.35 | 6.57 | 48.36 |
| chr3 | 62521461 | 62522327 | 867  | 285  | 19 | 32.82 | 4.93 | 49.42 |
| chr3 | 63364128 | 63365185 | 1058 | 519  | 21 | 30.79 | 5.34 | 50.99 |
| chr3 | 63367472 | 63368653 | 1182 | 568  | 24 | 32.36 | 6.16 | 49.81 |
| chr3 | 63540863 | 63542285 | 1423 | 721  | 28 | 31.05 | 7.99 | 50.75 |
| chr3 | 64103234 | 64104170 | 937  | 463  | 21 | 37.27 | 4.52 | 46.57 |
| chr3 | 64565981 | 64566638 | 658  | 341  | 16 | 32.34 | 5.34 | 49.93 |
| chr3 | 66653610 | 66654238 | 629  | 347  | 18 | 35.25 | 5.14 | 47.28 |
| chr3 | 66734645 | 66736706 | 2062 | 563  | 40 | 35.38 | 4.7  | 47.59 |
| chr3 | 66980488 | 66983113 | 2626 | 1831 | 60 | 31.35 | 3.66 | 50.23 |
| chr3 | 67151057 | 67153212 | 2156 | 1003 | 47 | 63.98 | 6.15 | 53.77 |
| chr3 | 67381366 | 67382877 | 1512 | 248  | 30 | 39.02 | 4.52 | 46.2  |
| chr3 | 67871875 | 67872828 | 954  | 447  | 20 | 32.16 | 5.34 | 49.86 |
| chr3 | 67873667 | 67875168 | 1502 | 1008 | 33 | 47.12 | 5.34 | 47.5  |
| chr3 | 68214271 | 68215284 | 1014 | 315  | 21 | 33    | 4.52 | 49.18 |
| chr3 | 68730328 | 68731621 | 1294 | 795  | 29 | 46.26 | 5.34 | 48.61 |

|      |          |          |      |      |    |       |      |       |
|------|----------|----------|------|------|----|-------|------|-------|
| chr3 | 69090213 | 69092128 | 1916 | 1299 | 38 | 32.84 | 4.54 | 49.38 |
| chr3 | 69780415 | 69781399 | 985  | 467  | 23 | 38.74 | 4.93 | 46.15 |
| chr3 | 69938168 | 69939162 | 995  | 748  | 21 | 34.01 | 4.93 | 48.54 |
| chr3 | 70086028 | 70086918 | 891  | 289  | 19 | 31.48 | 5.34 | 49.85 |
| chr3 | 70640607 | 70641541 | 935  | 288  | 22 | 37.39 | 6.16 | 46.67 |
| chr3 | 70669137 | 70671343 | 2207 | 1752 | 53 | 75.9  | 6.47 | 56.76 |
| chr3 | 70683744 | 70684542 | 799  | 515  | 21 | 41.96 | 4.95 | 47.05 |
| chr3 | 70798174 | 70799097 | 924  | 280  | 20 | 33.79 | 5.75 | 48.76 |
| chr3 | 71050890 | 71051996 | 1107 | 386  | 26 | 31.79 | 4.36 | 49.79 |
| chr3 | 71259369 | 71260251 | 883  | 413  | 23 | 33.53 | 5.37 | 48.67 |
| chr3 | 71288801 | 71290002 | 1202 | 697  | 33 | 31.02 | 3.69 | 50.52 |
| chr3 | 71392785 | 71393737 | 953  | 607  | 25 | 34.69 | 4.52 | 47.79 |
| chr3 | 71621041 | 71623124 | 2084 | 545  | 52 | 34.6  | 3.83 | 47.76 |
| chr3 | 71869581 | 71871004 | 1424 | 804  | 31 | 47.28 | 5.34 | 48.06 |
| chr3 | 72169740 | 72170514 | 775  | 500  | 20 | 43.3  | 5.75 | 48.08 |
| chr3 | 72313943 | 72314907 | 965  | 472  | 21 | 31.59 | 5.33 | 50.02 |
| chr3 | 72417732 | 72418855 | 1124 | 776  | 23 | 31.38 | 5.34 | 50.22 |
| chr3 | 72927004 | 72928296 | 1293 | 685  | 26 | 34.1  | 7.34 | 48.18 |
| chr3 | 72999452 | 73000485 | 1034 | 678  | 21 | 31.98 | 6.57 | 49.84 |
| chr3 | 73067935 | 73069271 | 1337 | 651  | 34 | 32.27 | 4    | 50.06 |
| chr3 | 73133851 | 73134750 | 900  | 588  | 19 | 31    | 4.93 | 50.47 |
| chr3 | 73426945 | 73427707 | 763  | 472  | 22 | 44.65 | 4.95 | 48.91 |
| chr3 | 73487708 | 73488328 | 621  | 290  | 15 | 30.14 | 5.34 | 51.64 |
| chr3 | 73533569 | 73535285 | 1717 | 976  | 40 | 32.08 | 3.74 | 49.7  |
| chr3 | 73740809 | 73741641 | 833  | 464  | 20 | 39.29 | 5.75 | 46.52 |
| chr3 | 73785422 | 73786114 | 693  | 285  | 16 | 30.12 | 5.75 | 51.63 |
| chr3 | 73812183 | 73813082 | 900  | 291  | 19 | 31    | 4.93 | 50.47 |
| chr3 | 74490155 | 74490790 | 636  | 348  | 16 | 30.51 | 4.57 | 51.3  |
| chr3 | 74747705 | 74748689 | 985  | 708  | 22 | 34.55 | 4.52 | 47.78 |
| chr3 | 75085698 | 75087107 | 1410 | 697  | 30 | 31.51 | 5.48 | 49.89 |
| chr3 | 75152334 | 75153228 | 895  | 613  | 19 | 31.27 | 3.7  | 50.46 |
| chr3 | 76047253 | 76048750 | 1498 | 280  | 32 | 47.33 | 4.52 | 48.18 |
| chr3 | 76090212 | 76092169 | 1958 | 628  | 48 | 32.77 | 3.95 | 49.44 |
| chr3 | 76348687 | 76349379 | 693  | 273  | 16 | 30.12 | 6.16 | 51.63 |
| chr3 | 76566000 | 76567726 | 1727 | 289  | 32 | 36.65 | 3.7  | 46.98 |
| chr3 | 77709149 | 77709916 | 768  | 437  | 17 | 30.01 | 4.93 | 51.49 |
| chr3 | 78010701 | 78011940 | 1240 | 630  | 25 | 30.91 | 5.9  | 50.65 |
| chr3 | 78039355 | 78040189 | 835  | 488  | 22 | 33.66 | 5.48 | 48.64 |
| chr3 | 78083592 | 78085177 | 1586 | 587  | 45 | 45.95 | 4.35 | 49.61 |
| chr3 | 78096507 | 78098159 | 1653 | 1171 | 46 | 50.07 | 5.71 | 51.72 |
| chr3 | 78126586 | 78127533 | 948  | 664  | 21 | 34.32 | 4.72 | 47.8  |
| chr3 | 78235531 | 78236161 | 631  | 283  | 17 | 38.19 | 6.04 | 46.3  |
| chr3 | 78589035 | 78589652 | 618  | 286  | 17 | 40.13 | 6.57 | 46.71 |
| chr3 | 79256530 | 79257527 | 998  | 495  | 23 | 37.98 | 4.52 | 46.41 |
| chr3 | 79751687 | 79752579 | 893  | 633  | 19 | 31.38 | 4.11 | 50.16 |
| chr3 | 79846586 | 79847564 | 979  | 268  | 20 | 30.86 | 4.93 | 50.91 |
| chr3 | 79945498 | 79947778 | 2281 | 658  | 44 | 30.75 | 4.07 | 50.97 |
| chr3 | 79982685 | 79983976 | 1292 | 609  | 28 | 42.29 | 6.98 | 47.33 |
| chr3 | 80036605 | 80038350 | 1746 | 1464 | 35 | 30.12 | 4.84 | 51.64 |
| chr3 | 80183199 | 80184921 | 1723 | 513  | 39 | 54.24 | 4.28 | 54.32 |
| chr3 | 80381538 | 80382911 | 1374 | 713  | 29 | 41.96 | 6.16 | 47.1  |
| chr3 | 80401745 | 80402733 | 989  | 366  | 20 | 30.36 | 5.75 | 51.62 |

|      |          |          |      |      |    |       |      |       |
|------|----------|----------|------|------|----|-------|------|-------|
| chr3 | 80535333 | 80536206 | 874  | 264  | 22 | 41.2  | 4.93 | 46.62 |
| chr3 | 80781372 | 80783176 | 1805 | 1126 | 43 | 41.07 | 4.4  | 46.37 |
| chr3 | 80871008 | 80872284 | 1277 | 632  | 29 | 35.93 | 4.19 | 47.08 |
| chr3 | 80983954 | 80985660 | 1707 | 1118 | 35 | 44.58 | 4.11 | 48.95 |
| chr3 | 81131543 | 81133368 | 1826 | 1201 | 42 | 65.98 | 6.98 | 54.17 |
| chr3 | 81133531 | 81134289 | 759  | 303  | 18 | 34.95 | 6.57 | 47.68 |
| chr3 | 81154119 | 81155092 | 974  | 685  | 22 | 35.16 | 5.34 | 47.17 |
| chr3 | 81187245 | 81188158 | 914  | 244  | 22 | 34.46 | 4.57 | 47.78 |
| chr3 | 81335613 | 81336342 | 730  | 306  | 19 | 41.68 | 5.75 | 47.15 |
| chr3 | 81631389 | 81632982 | 1594 | 932  | 36 | 33.35 | 3.81 | 48.67 |
| chr3 | 81664713 | 81665741 | 1029 | 752  | 26 | 44.19 | 4.95 | 48.05 |
| chr3 | 81901513 | 81902389 | 877  | 639  | 19 | 32.26 | 4.11 | 49.99 |
| chr3 | 82068304 | 82069298 | 995  | 342  | 20 | 30.06 | 4.11 | 51.48 |
| chr3 | 82318504 | 82319333 | 830  | 426  | 18 | 30.71 | 5.34 | 50.99 |
| chr3 | 82756843 | 82758098 | 1256 | 508  | 26 | 36.32 | 5.75 | 47.01 |
| chr3 | 82774424 | 82775277 | 854  | 575  | 21 | 32.47 | 4.45 | 49.49 |
| chr3 | 82927815 | 82928565 | 751  | 243  | 21 | 50.21 | 5.75 | 51.57 |
| chr3 | 83033730 | 83035061 | 1332 | 647  | 26 | 32.77 | 6.57 | 49.42 |
| chr3 | 83085420 | 83086377 | 958  | 310  | 21 | 36.06 | 6.57 | 46.97 |
| chr3 | 83118067 | 83118954 | 888  | 451  | 22 | 40.29 | 5.75 | 46.88 |
| chr3 | 83252974 | 83253640 | 667  | 276  | 16 | 31.75 | 4.52 | 49.79 |
| chr3 | 84718254 | 84719323 | 1070 | 450  | 25 | 42.31 | 4.11 | 47.42 |
| chr3 | 84816656 | 84817573 | 918  | 512  | 24 | 47.58 | 6.57 | 48.99 |
| chr3 | 84820272 | 84821236 | 965  | 365  | 20 | 31.58 | 4.52 | 50    |
| chr3 | 85666663 | 85667406 | 744  | 391  | 18 | 35.93 | 6.16 | 47.06 |
| chr3 | 85959494 | 85960615 | 1122 | 607  | 23 | 31.48 | 4.93 | 49.91 |
| chr3 | 86060210 | 86061139 | 930  | 639  | 22 | 37.69 | 4.93 | 46.43 |
| chr3 | 86362813 | 86363509 | 697  | 416  | 18 | 39.18 | 4.93 | 46.27 |
| chr3 | 86950313 | 86951249 | 937  | 654  | 21 | 37.27 | 4.93 | 46.57 |
| chr3 | 87346961 | 87348184 | 1224 | 665  | 31 | 32.02 | 3.42 | 49.79 |
| chr3 | 87719289 | 87720331 | 1043 | 268  | 22 | 31.53 | 4.93 | 49.89 |
| chr3 | 87803618 | 87804399 | 782  | 401  | 18 | 33.52 | 5.34 | 48.58 |
| chr3 | 87830753 | 87831933 | 1181 | 514  | 28 | 48.64 | 5.75 | 50    |
| chr3 | 87897297 | 87898513 | 1217 | 775  | 29 | 47.64 | 5.9  | 49.16 |
| chr3 | 87899268 | 87900584 | 1317 | 680  | 28 | 40.47 | 5.3  | 46.98 |
| chr3 | 88119525 | 88120741 | 1217 | 509  | 30 | 49.33 | 4.95 | 51.25 |
| chr3 | 88335921 | 88336748 | 828  | 184  | 18 | 30.83 | 4.11 | 50.88 |
| chr3 | 88702977 | 88703788 | 812  | 527  | 18 | 31.74 | 6.16 | 49.76 |
| chr3 | 89382788 | 89383745 | 958  | 433  | 21 | 36.06 | 5.34 | 46.97 |
| chr3 | 89607038 | 89608035 | 998  | 710  | 22 | 33.85 | 6.16 | 48.73 |
| chr3 | 90061881 | 90062716 | 836  | 298  | 18 | 30.38 | 4.52 | 51.65 |
| chr3 | 90181316 | 90182292 | 977  | 563  | 22 | 30.95 | 6.09 | 50.54 |
| chr3 | 93512658 | 93513786 | 1129 | 690  | 26 | 31.8  | 4.11 | 49.81 |
| chr3 | 93693212 | 93694243 | 1032 | 539  | 25 | 34.03 | 4.84 | 48.58 |
| chr3 | 93729519 | 93730802 | 1284 | 621  | 27 | 30.67 | 3.97 | 51.07 |
| chr3 | 93771036 | 93772509 | 1474 | 527  | 32 | 31.02 | 4.52 | 50.48 |
| chr3 | 93780961 | 93782651 | 1691 | 848  | 45 | 41.41 | 4.41 | 47.02 |
| chr3 | 94148397 | 94149164 | 768  | 284  | 20 | 43.81 | 6.57 | 47.85 |
| chr3 | 94821836 | 94822932 | 1097 | 534  | 24 | 36.62 | 6.16 | 46.95 |
| chr3 | 94850893 | 94852161 | 1269 | 648  | 26 | 35.69 | 6.98 | 47.21 |
| chr3 | 94907027 | 94907886 | 860  | 267  | 22 | 42.13 | 6.57 | 46.79 |
| chr3 | 95096335 | 95097099 | 765  | 475  | 17 | 30.19 | 5.75 | 51.7  |

|      |           |           |      |      |    |       |      |       |
|------|-----------|-----------|------|------|----|-------|------|-------|
| chr3 | 95148754  | 95149657  | 904  | 340  | 19 | 30.79 | 4.11 | 50.91 |
| chr3 | 95363491  | 95364387  | 897  | 506  | 21 | 39.72 | 5.34 | 46.59 |
| chr3 | 95615110  | 95616181  | 1072 | 430  | 21 | 30.12 | 4.52 | 51.63 |
| chr3 | 96068420  | 96069736  | 1317 | 778  | 26 | 33.44 | 4.93 | 48.6  |
| chr3 | 96463942  | 96465421  | 1480 | 1001 | 30 | 40.53 | 4.11 | 46.86 |
| chr3 | 96653090  | 96653905  | 816  | 476  | 18 | 31.51 | 4.52 | 49.84 |
| chr3 | 96690005  | 96690789  | 785  | 521  | 18 | 33.33 | 4.52 | 48.72 |
| chr3 | 96944875  | 96946159  | 1285 | 531  | 33 | 59.98 | 6.16 | 55.99 |
| chr3 | 97463153  | 97464575  | 1423 | 879  | 33 | 51.44 | 5.75 | 51.78 |
| chr3 | 97664422  | 97665035  | 614  | 341  | 15 | 30.6  | 5.34 | 51.25 |
| chr3 | 98291295  | 98292153  | 859  | 285  | 23 | 46.96 | 5.34 | 47.57 |
| chr3 | 99799978  | 99800724  | 747  | 477  | 17 | 30.39 | 4.83 | 51.62 |
| chr3 | 100162539 | 100163399 | 861  | 255  | 19 | 31.64 | 4.78 | 49.9  |
| chr3 | 100283900 | 100285039 | 1140 | 597  | 23 | 30.63 | 4.93 | 51.19 |
| chr3 | 100316807 | 100317698 | 892  | 254  | 21 | 30.22 | 4.11 | 51.75 |
| chr3 | 100557493 | 100558538 | 1046 | 385  | 23 | 31.14 | 5.33 | 50.63 |
| chr3 | 101545445 | 101547097 | 1653 | 663  | 35 | 41.95 | 4.23 | 47.08 |
| chr3 | 102066194 | 102066963 | 770  | 478  | 18 | 34.26 | 5.34 | 47.87 |
| chr3 | 102166808 | 102168067 | 1260 | 653  | 30 | 52.56 | 5.75 | 50.32 |
| chr3 | 102585172 | 102586053 | 882  | 610  | 20 | 35.21 | 5.24 | 47.17 |
| chr3 | 102598399 | 102599353 | 955  | 678  | 20 | 32.11 | 4.93 | 49.7  |
| chr3 | 102818389 | 102819128 | 740  | 256  | 17 | 31.67 | 5.75 | 49.82 |
| chr3 | 103220473 | 103221708 | 1236 | 749  | 25 | 30.45 | 5.84 | 51.29 |
| chr3 | 103229396 | 103231169 | 1774 | 1323 | 38 | 52.64 | 4.93 | 50.4  |
| chr3 | 103517139 | 103518204 | 1066 | 512  | 24 | 33.87 | 5.33 | 48.64 |
| chr3 | 104283983 | 104285264 | 1282 | 742  | 27 | 37.62 | 5.24 | 45.83 |
| chr3 | 104475774 | 104476985 | 1212 | 531  | 27 | 42.58 | 6.57 | 47.11 |
| chr3 | 104601234 | 104602150 | 917  | 279  | 23 | 42.97 | 5.34 | 47.47 |
| chr3 | 104932815 | 104933535 | 721  | 357  | 20 | 47.44 | 6.98 | 48.56 |
| chr3 | 104985571 | 104986371 | 801  | 514  | 20 | 41.45 | 5.34 | 47.03 |
| chr3 | 105139509 | 105140083 | 575  | 287  | 15 | 32.66 | 6.16 | 49.32 |
| chr3 | 105160325 | 105161397 | 1073 | 291  | 21 | 30.07 | 6.16 | 51.46 |
| chr3 | 105237758 | 105238754 | 997  | 578  | 26 | 39.39 | 4.79 | 46.93 |
| chr3 | 105253781 | 105254666 | 886  | 478  | 19 | 31.76 | 4.52 | 49.79 |
| chr3 | 105425425 | 105426502 | 1078 | 552  | 25 | 37.1  | 4.57 | 46.98 |
| chr3 | 105644560 | 105645435 | 876  | 380  | 20 | 36.58 | 6.16 | 46.91 |
| chr3 | 105722363 | 105723674 | 1312 | 505  | 28 | 35.12 | 5.24 | 47.38 |
| chr3 | 105841887 | 105842590 | 704  | 334  | 18 | 38.67 | 6.57 | 46.15 |
| chr3 | 105899800 | 105900978 | 1179 | 313  | 27 | 44.45 | 4.52 | 48.55 |
| chr3 | 106396357 | 106397912 | 1556 | 1267 | 34 | 44.84 | 5.12 | 48.81 |
| chr3 | 106751093 | 106752360 | 1268 | 417  | 26 | 35.73 | 4.52 | 47.18 |
| chr3 | 107024592 | 107026197 | 1606 | 1320 | 34 | 45.71 | 5.34 | 49.81 |
| chr3 | 107139583 | 107141877 | 2295 | 420  | 56 | 37.31 | 3.75 | 46.7  |
| chr3 | 107203073 | 107204199 | 1127 | 626  | 24 | 35.06 | 6.16 | 47.45 |
| chr3 | 107336468 | 107338782 | 2315 | 1819 | 67 | 60.95 | 4.93 | 54.51 |
| chr3 | 107539721 | 107540568 | 848  | 243  | 19 | 33.92 | 4.11 | 48.7  |
| chr3 | 107793054 | 107794428 | 1375 | 822  | 35 | 53.48 | 7.36 | 52    |
| chr3 | 108000928 | 108001616 | 689  | 351  | 17 | 30.46 | 5.21 | 51.29 |
| chr3 | 108069205 | 108070498 | 1294 | 587  | 29 | 46.26 | 6.16 | 48.61 |
| chr3 | 108268406 | 108269091 | 686  | 398  | 18 | 36.71 | 6.16 | 46.97 |
| chr3 | 108335115 | 108336151 | 1037 | 577  | 24 | 39.97 | 6.98 | 46.76 |
| chr3 | 108351381 | 108352487 | 1107 | 407  | 23 | 31.17 | 5.64 | 50.55 |

|      |           |           |      |      |    |       |      |       |
|------|-----------|-----------|------|------|----|-------|------|-------|
| chr3 | 108506488 | 108507510 | 1023 | 592  | 21 | 32.54 | 4.93 | 49.37 |
| chr3 | 108576686 | 108577564 | 879  | 597  | 21 | 40.87 | 4.93 | 46.32 |
| chr3 | 109863852 | 109864807 | 956  | 568  | 20 | 32.05 | 4.93 | 49.81 |
| chr3 | 110417341 | 110418147 | 807  | 258  | 18 | 32.02 | 4.52 | 49.75 |
| chr3 | 110518195 | 110519142 | 948  | 727  | 22 | 32.52 | 4.95 | 49.4  |
| chr3 | 111272656 | 111275084 | 2429 | 1489 | 59 | 64.74 | 5.66 | 53.19 |
| chr3 | 111284350 | 111285165 | 816  | 273  | 20 | 40.42 | 4.93 | 46.89 |
| chr3 | 111409099 | 111410326 | 1228 | 836  | 28 | 33.65 | 4.45 | 48.63 |
| chr3 | 111922171 | 111923151 | 981  | 697  | 23 | 38.98 | 4.93 | 46.13 |
| chr3 | 111958966 | 111959757 | 792  | 256  | 19 | 37.38 | 4.93 | 46.63 |
| chr3 | 112029766 | 112030860 | 1095 | 481  | 24 | 32.36 | 5.33 | 49.82 |
| chr3 | 112531909 | 112534511 | 2603 | 1229 | 61 | 31.87 | 5.35 | 49.74 |
| chr3 | 112784956 | 112785819 | 864  | 281  | 19 | 31.47 | 5.97 | 49.98 |
| chr3 | 112838570 | 112839402 | 833  | 599  | 18 | 30.55 | 4.52 | 51.23 |
| chr3 | 113121959 | 113123170 | 1212 | 599  | 27 | 42.58 | 5.75 | 47.11 |
| chr3 | 114028267 | 114029281 | 1015 | 736  | 25 | 45.71 | 5.75 | 49.85 |
| chr3 | 114154096 | 114155136 | 1041 | 440  | 21 | 31.63 | 5.75 | 49.91 |
| chr3 | 114330198 | 114331491 | 1294 | 629  | 26 | 34.5  | 6.16 | 47.65 |
| chr3 | 114454449 | 114455677 | 1229 | 637  | 25 | 32.74 | 4.43 | 49.37 |
| chr3 | 114698593 | 114699603 | 1011 | 583  | 23 | 37.24 | 5.34 | 46.69 |
| chr3 | 114858918 | 114859714 | 797  | 334  | 19 | 37.06 | 6.16 | 46.98 |
| chr3 | 115929541 | 115930485 | 945  | 469  | 20 | 32.64 | 4.93 | 49.32 |
| chr3 | 116351344 | 116352370 | 1027 | 644  | 25 | 44.94 | 5.75 | 48.76 |
| chr3 | 116476110 | 116477855 | 1746 | 276  | 31 | 35.87 | 4.52 | 47.04 |
| chr3 | 116599576 | 116600640 | 1065 | 266  | 23 | 30.19 | 4.57 | 51.73 |
| chr3 | 117673161 | 117674119 | 959  | 329  | 27 | 53.66 | 7.99 | 52.04 |
| chr3 | 117734063 | 117735092 | 1030 | 644  | 21 | 32.18 | 5.34 | 49.95 |
| chr3 | 118144082 | 118145538 | 1457 | 661  | 33 | 40.28 | 5.1  | 46.87 |
| chr3 | 118697792 | 118698579 | 788  | 517  | 19 | 37.65 | 4.52 | 45.95 |
| chr3 | 119170181 | 119171295 | 1115 | 347  | 28 | 49.73 | 5.51 | 51.91 |
| chr3 | 119696433 | 119697485 | 1053 | 327  | 26 | 42.67 | 7.23 | 47.43 |
| chr3 | 119755821 | 119756905 | 1085 | 603  | 23 | 30.39 | 5.06 | 51.62 |
| chr3 | 119835994 | 119836874 | 881  | 478  | 20 | 35.89 | 5.3  | 46.98 |
| chr3 | 119928057 | 119929542 | 1486 | 246  | 31 | 44.03 | 4.52 | 48.12 |
| chr3 | 119930064 | 119930704 | 641  | 289  | 18 | 30.19 | 5.33 | 51.69 |
| chr3 | 119970836 | 119972481 | 1646 | 637  | 38 | 59.59 | 4.93 | 55.59 |
| chr3 | 120034062 | 120034977 | 916  | 267  | 19 | 30.15 | 4.93 | 51.66 |
| chr3 | 120324377 | 120325310 | 934  | 474  | 20 | 33.24 | 4.52 | 48.96 |
| chr3 | 120679236 | 120680082 | 847  | 320  | 20 | 34.34 | 4.57 | 47.88 |
| chr3 | 120771483 | 120772632 | 1150 | 678  | 30 | 51.17 | 5.52 | 51.59 |
| chr3 | 120896682 | 120897686 | 1005 | 433  | 21 | 33.48 | 4.93 | 48.6  |
| chr3 | 120915007 | 120916620 | 1614 | 954  | 36 | 46.61 | 6.09 | 47.51 |
| chr3 | 120937419 | 120938067 | 649  | 281  | 16 | 32.94 | 5.34 | 49.39 |
| chr3 | 121148278 | 121149581 | 1304 | 702  | 32 | 30.92 | 4.28 | 50.58 |
| chr3 | 121187928 | 121189301 | 1374 | 416  | 32 | 48.12 | 4.95 | 49.37 |
| chr3 | 121454776 | 121455762 | 987  | 305  | 26 | 36.38 | 5.49 | 47.17 |
| chr3 | 121785678 | 121787121 | 1444 | 695  | 39 | 42.35 | 5.42 | 47.06 |
| chr3 | 121790972 | 121791729 | 758  | 284  | 20 | 33.11 | 4.32 | 49.19 |
| chr3 | 121923629 | 121924688 | 1060 | 423  | 23 | 30.44 | 4.57 | 51.3  |
| chr3 | 121924692 | 121925909 | 1218 | 543  | 25 | 30.01 | 4.95 | 51.47 |
| chr3 | 121971397 | 121972378 | 982  | 258  | 24 | 32.56 | 4.45 | 49.35 |
| chr3 | 122082339 | 122083402 | 1064 | 680  | 26 | 47.08 | 5.75 | 47.5  |

|      |           |           |      |      |    |       |      |       |
|------|-----------|-----------|------|------|----|-------|------|-------|
| chr3 | 122390420 | 122391954 | 1535 | 1123 | 31 | 31.81 | 3.57 | 49.84 |
| chr3 | 122431121 | 122432429 | 1309 | 782  | 30 | 39.98 | 5.41 | 46.85 |
| chr3 | 122539574 | 122540321 | 748  | 531  | 18 | 30.19 | 4.03 | 51.73 |
| chr3 | 122924606 | 122925776 | 1171 | 786  | 28 | 35.42 | 6.04 | 47.49 |
| chr3 | 122937599 | 122938620 | 1022 | 291  | 23 | 34.24 | 5.12 | 47.92 |
| chr3 | 124070320 | 124071023 | 704  | 394  | 19 | 39.54 | 6.09 | 46.86 |
| chr3 | 124647618 | 124648810 | 1193 | 560  | 26 | 34.79 | 4.57 | 47.56 |
| chr3 | 124812947 | 124814111 | 1165 | 635  | 31 | 54.52 | 6.26 | 54.35 |
| chr3 | 125690996 | 125691667 | 672  | 385  | 16 | 31.43 | 4.93 | 50.09 |
| chr3 | 126341910 | 126342838 | 929  | 288  | 24 | 46.81 | 6.98 | 47.33 |
| chr3 | 126528835 | 126529496 | 662  | 415  | 16 | 32.08 | 4.93 | 49.79 |
| chr3 | 127007925 | 127008734 | 810  | 363  | 19 | 36.23 | 4.93 | 46.97 |
| chr3 | 127659539 | 127660634 | 1096 | 385  | 26 | 38    | 5.16 | 46.49 |
| chr3 | 127661169 | 127662309 | 1141 | 655  | 24 | 34.35 | 5.34 | 47.85 |
| chr3 | 127754867 | 127755747 | 881  | 594  | 20 | 36.28 | 4.11 | 46.9  |
| chr3 | 127837921 | 127839147 | 1227 | 557  | 30 | 51.31 | 6.3  | 51.4  |
| chr3 | 128160818 | 128162135 | 1318 | 685  | 26 | 33.4  | 6.16 | 48.7  |
| chr3 | 128263917 | 128264798 | 882  | 638  | 21 | 40.68 | 4.93 | 46.47 |
| chr3 | 128470871 | 128472047 | 1177 | 494  | 29 | 39.39 | 6.1  | 46.91 |
| chr3 | 129500427 | 129501719 | 1293 | 665  | 27 | 33.5  | 6.47 | 48.65 |
| chr3 | 129808004 | 129808934 | 931  | 461  | 22 | 34.68 | 6.23 | 47.78 |
| chr3 | 130435392 | 130436231 | 840  | 251  | 22 | 33.34 | 4.79 | 48.68 |
| chr3 | 130611734 | 130613987 | 2254 | 826  | 54 | 32.63 | 4.48 | 49.38 |
| chr3 | 130837648 | 130838863 | 1216 | 740  | 25 | 34.48 | 4.93 | 47.74 |
| chr3 | 130911154 | 130911956 | 803  | 540  | 19 | 36.67 | 4.93 | 47.02 |
| chr3 | 131139655 | 131140647 | 993  | 314  | 23 | 38.27 | 6.57 | 46.26 |
| chr3 | 131198378 | 131199029 | 652  | 274  | 16 | 30.9  | 5.9  | 50.67 |
| chr3 | 131206519 | 131208127 | 1609 | 670  | 38 | 40.36 | 4.85 | 46.92 |
| chr3 | 131472506 | 131473980 | 1475 | 544  | 32 | 48.56 | 4.93 | 49.54 |
| chr3 | 132260447 | 132261305 | 859  | 243  | 20 | 31.94 | 4.05 | 49.75 |
| chr3 | 132820106 | 132821020 | 915  | 336  | 19 | 30.21 | 3.7  | 51.69 |
| chr3 | 132868902 | 132869657 | 756  | 476  | 18 | 30.99 | 5.27 | 50.48 |
| chr3 | 132874074 | 132875224 | 1151 | 638  | 31 | 49.69 | 5.14 | 51.42 |
| chr3 | 133001238 | 133002712 | 1475 | 1004 | 33 | 34.95 | 4.11 | 47.67 |
| chr3 | 133052048 | 133053239 | 1192 | 522  | 28 | 47.97 | 5.75 | 49.38 |
| chr3 | 133105195 | 133105880 | 686  | 279  | 17 | 30.18 | 4.79 | 51.65 |
| chr3 | 133127796 | 133129006 | 1211 | 678  | 29 | 51.19 | 5.75 | 51.8  |
| chr3 | 133309075 | 133310481 | 1407 | 603  | 39 | 32.09 | 3.91 | 49.72 |
| chr3 | 133317061 | 133318216 | 1156 | 576  | 24 | 30.61 | 5.06 | 51.19 |
| chr3 | 133342841 | 133343611 | 771  | 280  | 23 | 45.57 | 6.49 | 50.11 |
| chr3 | 135158433 | 135159278 | 846  | 573  | 19 | 34.03 | 4.93 | 48.53 |
| chr3 | 135325116 | 135325897 | 782  | 271  | 18 | 33.52 | 5.75 | 48.58 |
| chr3 | 135622428 | 135623557 | 1130 | 642  | 29 | 56.53 | 6.98 | 53.46 |
| chr3 | 135670259 | 135671162 | 904  | 472  | 22 | 39.28 | 6.57 | 46.47 |
| chr3 | 136522869 | 136523978 | 1110 | 629  | 24 | 35.94 | 6.16 | 47.08 |
| chr3 | 136588427 | 136589241 | 815  | 428  | 22 | 45.28 | 5.75 | 49.18 |
| chr3 | 136594741 | 136595923 | 1183 | 638  | 28 | 30.09 | 4.98 | 51.55 |
| chr3 | 136677787 | 136678629 | 843  | 477  | 20 | 34.58 | 5.71 | 47.72 |
| chr3 | 136679188 | 136680421 | 1234 | 608  | 28 | 44.97 | 5.3  | 48.89 |
| chr3 | 136720280 | 136722102 | 1823 | 505  | 38 | 30.72 | 4.2  | 51.03 |
| chr3 | 137346631 | 137348207 | 1577 | 1031 | 30 | 36.12 | 4.52 | 46.98 |
| chr3 | 137354583 | 137355655 | 1073 | 324  | 23 | 33.9  | 5.34 | 48.62 |

|      |           |           |      |     |    |       |      |       |
|------|-----------|-----------|------|-----|----|-------|------|-------|
| chr3 | 137363403 | 137364763 | 1361 | 745 | 28 | 38.77 | 5.75 | 46    |
| chr3 | 137920653 | 137921608 | 956  | 315 | 22 | 36.17 | 5.34 | 46.95 |
| chr3 | 138197898 | 138198995 | 1098 | 481 | 24 | 32.21 | 5.71 | 49.95 |
| chr3 | 138264108 | 138265094 | 987  | 463 | 21 | 31.59 | 5.06 | 49.99 |
| chr3 | 138477346 | 138478598 | 1253 | 686 | 26 | 31.22 | 4.89 | 50.53 |
| chr3 | 138500832 | 138502552 | 1721 | 637 | 37 | 36.44 | 3.77 | 47.18 |
| chr3 | 139315038 | 139315738 | 701  | 428 | 17 | 34.14 | 5.34 | 48.03 |
| chr3 | 140571675 | 140572660 | 986  | 696 | 23 | 38.68 | 5.75 | 46.15 |
| chr3 | 141435345 | 141436546 | 1202 | 638 | 24 | 30.38 | 4.83 | 51.65 |
| chr3 | 141682007 | 141683292 | 1286 | 641 | 28 | 42.61 | 6.98 | 47.35 |
| chr3 | 141760718 | 141761616 | 899  | 579 | 19 | 31.05 | 4.11 | 50.69 |
| chr3 | 142127114 | 142128642 | 1529 | 978 | 32 | 32.48 | 4.11 | 49.49 |
| chr3 | 142231549 | 142233069 | 1521 | 734 | 37 | 35.86 | 5.11 | 47.03 |
| chr3 | 142237520 | 142238461 | 942  | 324 | 23 | 31.64 | 4.5  | 49.91 |
| chr3 | 142260804 | 142262022 | 1219 | 739 | 31 | 43.04 | 4.32 | 47.48 |
| chr3 | 142312946 | 142314980 | 2035 | 543 | 42 | 54.16 | 5.3  | 53.18 |
| chr3 | 142431600 | 142432836 | 1237 | 514 | 30 | 54.01 | 6.57 | 52.76 |
| chr3 | 142545734 | 142546842 | 1109 | 570 | 33 | 31.45 | 5.38 | 50    |
| chr3 | 142687775 | 142688630 | 856  | 593 | 19 | 33.45 | 4.11 | 48.63 |
| chr3 | 143066689 | 143067840 | 1152 | 376 | 26 | 32.4  | 4.24 | 49.68 |
| chr3 | 143127165 | 143127951 | 787  | 350 | 20 | 33.21 | 4.5  | 49.14 |
| chr3 | 143219056 | 143220282 | 1227 | 623 | 25 | 33.95 | 5.75 | 48.63 |
| chr3 | 143709599 | 143711584 | 1986 | 774 | 46 | 49.95 | 4.79 | 51.76 |
| chr3 | 143807174 | 143808571 | 1398 | 709 | 32 | 52.89 | 5.34 | 50.49 |
| chr3 | 144305970 | 144306686 | 717  | 335 | 19 | 42.65 | 6.57 | 47.36 |
| chr3 | 144843695 | 144844631 | 937  | 684 | 20 | 33.07 | 5.34 | 49.17 |
| chr3 | 144920390 | 144921444 | 1055 | 735 | 23 | 34.84 | 6.98 | 47.54 |
| chr3 | 144999749 | 145000607 | 859  | 251 | 21 | 42.2  | 4.93 | 47.07 |
| chr3 | 145149473 | 145150384 | 912  | 528 | 20 | 30.58 | 5.33 | 51.23 |
| chr3 | 145242749 | 145243875 | 1127 | 805 | 23 | 31.24 | 5.34 | 50.47 |
| chr3 | 145451740 | 145452906 | 1167 | 604 | 24 | 33.08 | 4.93 | 49.14 |
| chr3 | 145556430 | 145557328 | 899  | 275 | 21 | 39.59 | 5.34 | 46.6  |
| chr3 | 145560775 | 145561458 | 684  | 216 | 17 | 35.28 | 4.93 | 47.37 |
| chr3 | 145928646 | 145929556 | 911  | 418 | 20 | 34.53 | 5.34 | 47.68 |
| chr3 | 146108798 | 146109459 | 662  | 388 | 17 | 36.82 | 4.93 | 46.81 |
| chr3 | 146116046 | 146116968 | 923  | 288 | 22 | 34.54 | 4.62 | 47.73 |
| chr3 | 146456194 | 146457039 | 846  | 272 | 20 | 38.45 | 5.75 | 46.34 |
| chr3 | 146714043 | 146715030 | 988  | 513 | 22 | 34.39 | 4.52 | 47.77 |
| chr3 | 147670844 | 147671666 | 823  | 539 | 18 | 31.11 | 4.52 | 50.68 |
| chr3 | 147782471 | 147783439 | 969  | 560 | 23 | 39.69 | 7.39 | 46.52 |
| chr3 | 147809257 | 147810277 | 1021 | 775 | 21 | 32.64 | 4.93 | 49.3  |
| chr3 | 147988077 | 147989044 | 968  | 527 | 24 | 44.21 | 5.34 | 48.05 |
| chr3 | 148404287 | 148404944 | 658  | 375 | 16 | 32.34 | 6.16 | 49.93 |
| chr3 | 148509773 | 148510650 | 878  | 605 | 19 | 32.2  | 4.93 | 49.92 |
| chr3 | 148553412 | 148554182 | 771  | 262 | 19 | 38.78 | 4.93 | 46.03 |
| chr3 | 148880201 | 148881485 | 1285 | 863 | 34 | 57.89 | 4.57 | 53.26 |
| chr3 | 149017107 | 149017765 | 659  | 234 | 16 | 32.27 | 4.93 | 50.06 |
| chr3 | 149028750 | 149029667 | 918  | 229 | 20 | 34.13 | 6.16 | 48.07 |
| chr3 | 149644137 | 149645134 | 998  | 254 | 23 | 33.68 | 4.57 | 48.6  |
| chr3 | 149713080 | 149713954 | 875  | 633 | 21 | 31.21 | 4.11 | 50.56 |
| chr3 | 149831277 | 149832565 | 1289 | 838 | 26 | 34.73 | 5.75 | 47.63 |
| chr3 | 149943636 | 149944472 | 837  | 567 | 19 | 31.9  | 5.45 | 49.86 |

|      |           |           |      |      |    |       |      |       |
|------|-----------|-----------|------|------|----|-------|------|-------|
| chr3 | 150250857 | 150252509 | 1653 | 281  | 38 | 51.12 | 6.02 | 51.71 |
| chr3 | 150298291 | 150299950 | 1660 | 1139 | 35 | 41.62 | 4.62 | 47.11 |
| chr3 | 150647996 | 150649056 | 1061 | 446  | 23 | 34.52 | 6.16 | 47.75 |
| chr3 | 150784087 | 150784860 | 774  | 260  | 19 | 38.58 | 4.93 | 46.14 |
| chr3 | 150983959 | 150984852 | 894  | 605  | 21 | 31.67 | 4.59 | 49.85 |
| chr3 | 151170951 | 151172005 | 1055 | 402  | 22 | 30.94 | 5.34 | 50.6  |
| chr3 | 151386911 | 151387813 | 903  | 288  | 19 | 30.84 | 4.52 | 50.85 |
| chr3 | 151708662 | 151709669 | 1008 | 378  | 21 | 33.32 | 6.16 | 48.74 |
| chr3 | 151793821 | 151794560 | 740  | 260  | 18 | 31.99 | 4.89 | 49.86 |
| chr3 | 151939458 | 151941078 | 1621 | 701  | 38 | 42.11 | 6.98 | 46.94 |
| chr3 | 152017044 | 152019019 | 1976 | 1688 | 47 | 40.96 | 3.91 | 46.3  |
| chr3 | 152140993 | 152141989 | 997  | 432  | 22 | 30.49 | 4.62 | 51.28 |
| chr3 | 152604803 | 152605807 | 1005 | 388  | 21 | 33.48 | 6.57 | 48.6  |
| chr3 | 152744099 | 152745246 | 1148 | 473  | 24 | 34    | 5.75 | 48.56 |
| chr3 | 153453771 | 153455297 | 1527 | 355  | 31 | 42.01 | 4.93 | 47.05 |
| chr3 | 153497453 | 153498758 | 1306 | 552  | 26 | 33.94 | 6.98 | 48.68 |
| chr3 | 153776517 | 153777519 | 1003 | 490  | 21 | 33.58 | 4.52 | 48.66 |
| chr3 | 154272321 | 154273214 | 894  | 607  | 20 | 35.51 | 4.52 | 47.23 |
| chr3 | 154745096 | 154745932 | 837  | 343  | 18 | 30.33 | 4.93 | 51.59 |
| chr3 | 155213054 | 155214348 | 1295 | 855  | 30 | 50.43 | 4.93 | 52    |
| chr3 | 156806001 | 156808062 | 2062 | 1401 | 44 | 52.15 | 3.95 | 51.13 |
| chr3 | 156955961 | 156957469 | 1509 | 380  | 31 | 42.89 | 4.11 | 47.37 |
| chr3 | 158043654 | 158045046 | 1393 | 714  | 30 | 40.2  | 7.7  | 46.65 |
| chr3 | 158161491 | 158162344 | 854  | 589  | 19 | 33.57 | 4.52 | 48.6  |
| chr3 | 158241118 | 158242571 | 1454 | 764  | 30 | 36.45 | 5.33 | 47.16 |
| chr3 | 158832937 | 158834093 | 1157 | 632  | 24 | 33.56 | 5.34 | 48.56 |
| chr3 | 159213829 | 159214546 | 718  | 332  | 17 | 33.04 | 4.93 | 49.11 |
| chr3 | 159772555 | 159773486 | 932  | 643  | 21 | 37.57 | 4.93 | 45.87 |
| chr3 | 160124692 | 160126202 | 1511 | 1007 | 40 | 37.04 | 3.78 | 46.98 |
| chr3 | 160179549 | 160180588 | 1040 | 466  | 24 | 37.26 | 5.9  | 46.47 |
| chr3 | 160404035 | 160405990 | 1956 | 1208 | 45 | 48.08 | 4.79 | 49.32 |
| chr3 | 160497451 | 160498182 | 732  | 272  | 21 | 51.8  | 4.93 | 50.95 |
| chr3 | 161107390 | 161108398 | 1009 | 492  | 21 | 33.26 | 5.34 | 48.94 |
| chr3 | 161146644 | 161147879 | 1236 | 591  | 40 | 79.34 | 9.93 | 61.4  |
| chr3 | 161219094 | 161220332 | 1239 | 574  | 25 | 33.38 | 5.75 | 48.69 |
| chr3 | 161646885 | 161647685 | 801  | 532  | 18 | 32.38 | 4.93 | 49.75 |
| chr3 | 162017865 | 162018837 | 973  | 271  | 23 | 35.09 | 6.09 | 47.33 |
| chr3 | 162217650 | 162218941 | 1292 | 1004 | 34 | 64.17 | 6.16 | 53.85 |
| chr3 | 162741641 | 162742607 | 967  | 452  | 20 | 31.48 | 4.11 | 50    |
| chr3 | 162807714 | 162808644 | 931  | 477  | 22 | 33.48 | 5.33 | 48.65 |
| chr3 | 162929159 | 162929983 | 825  | 414  | 21 | 44.55 | 7.39 | 48.76 |
| chr3 | 163173453 | 163174437 | 985  | 390  | 20 | 30.56 | 5.75 | 51.26 |
| chr3 | 163431177 | 163432278 | 1102 | 411  | 27 | 39.54 | 5.71 | 46.84 |
| chr3 | 163492690 | 163493556 | 867  | 668  | 20 | 37.13 | 4.52 | 46.94 |
| chr3 | 164698326 | 164699162 | 837  | 495  | 18 | 30.33 | 4.52 | 51.59 |
| chr3 | 164817551 | 164818436 | 886  | 208  | 19 | 31.76 | 4.93 | 49.79 |
| chr3 | 165253850 | 165254530 | 681  | 367  | 19 | 45.46 | 4.93 | 49.78 |
| chr3 | 165867358 | 165868526 | 1169 | 689  | 24 | 32.98 | 5.75 | 49.22 |
| chr3 | 166398832 | 166399861 | 1030 | 393  | 23 | 36.18 | 5.34 | 46.84 |
| chr3 | 166467683 | 166469335 | 1653 | 1380 | 32 | 30.24 | 4.11 | 51.75 |
| chr3 | 166551591 | 166552384 | 794  | 505  | 18 | 32.79 | 5.34 | 49.41 |
| chr3 | 166824466 | 166825320 | 855  | 592  | 21 | 38.12 | 5.71 | 46.33 |



|      |           |           |      |      |    |       |      |       |
|------|-----------|-----------|------|------|----|-------|------|-------|
| chr3 | 166828289 | 166828982 | 694  | 246  | 16 | 30.06 | 4.93 | 51.46 |
| chr3 | 167601679 | 167602890 | 1212 | 494  | 24 | 30.98 | 4.93 | 50.44 |
| chr3 | 167621733 | 167622689 | 957  | 577  | 21 | 36.11 | 6.16 | 46.95 |
| chr3 | 167677889 | 167679441 | 1553 | 304  | 32 | 48.4  | 4.52 | 49.2  |
| chr3 | 167699603 | 167700424 | 822  | 286  | 18 | 31.16 | 5.75 | 50.58 |
| chr3 | 167886429 | 167887099 | 671  | 472  | 16 | 31.49 | 4.52 | 49.84 |
| chr3 | 167936146 | 167937230 | 1085 | 421  | 23 | 33.29 | 5.34 | 48.83 |
| chr3 | 168021791 | 168023372 | 1582 | 264  | 32 | 43.11 | 4.52 | 47.32 |
| chr3 | 168136635 | 168137690 | 1056 | 288  | 21 | 30.89 | 4.52 | 50.76 |
| chr3 | 168172017 | 168172777 | 761  | 551  | 17 | 30.42 | 3.7  | 51.28 |
| chr3 | 168240232 | 168241026 | 795  | 284  | 19 | 33.32 | 5.71 | 48.7  |
| chr3 | 168393270 | 168394236 | 967  | 536  | 22 | 35.55 | 6.57 | 47.19 |
| chr3 | 169053564 | 169054666 | 1103 | 629  | 24 | 36.31 | 4.93 | 46.95 |
| chr3 | 169063123 | 169064071 | 949  | 713  | 21 | 36.57 | 4.93 | 46.89 |
| chr3 | 169917259 | 169918927 | 1669 | 1060 | 34 | 39.45 | 5.51 | 47.1  |
| chr3 | 169965690 | 169966602 | 913  | 291  | 19 | 30.31 | 4.52 | 51.54 |
| chr3 | 170097965 | 170098839 | 875  | 330  | 19 | 32    | 6.12 | 49.77 |
| chr3 | 171282191 | 171283029 | 839  | 427  | 18 | 30.22 | 5.34 | 51.69 |
| chr3 | 171375160 | 171377257 | 2098 | 1832 | 48 | 71.26 | 5.34 | 52.34 |
| chr3 | 171388259 | 171389556 | 1298 | 693  | 27 | 38.06 | 6.16 | 46.43 |
| chr3 | 171577629 | 171578661 | 1033 | 469  | 21 | 32.03 | 6.98 | 49.77 |
| chr3 | 172016019 | 172017104 | 1086 | 818  | 29 | 59.67 | 6.57 | 56.01 |
| chr3 | 172156429 | 172157359 | 931  | 666  | 21 | 37.63 | 4.93 | 45.83 |
| chr3 | 172195080 | 172195949 | 870  | 286  | 20 | 32.96 | 5.71 | 49.28 |
| chr3 | 172217413 | 172218245 | 833  | 544  | 19 | 34.81 | 5.34 | 47.51 |
| chr3 | 172450680 | 172451683 | 1004 | 512  | 23 | 33.35 | 4.95 | 48.68 |
| chr3 | 172499679 | 172500614 | 936  | 710  | 21 | 33.19 | 3.81 | 49.08 |
| chr3 | 172813470 | 172814606 | 1137 | 699  | 25 | 38.51 | 4.93 | 46.22 |
| chr3 | 172921125 | 172922009 | 885  | 633  | 20 | 36.04 | 4.93 | 46.89 |
| chr3 | 173050995 | 173052320 | 1326 | 641  | 31 | 50.42 | 5.97 | 51.93 |
| chr3 | 173640257 | 173641391 | 1135 | 647  | 24 | 34.65 | 6.16 | 47.66 |
| chr3 | 174037277 | 174038029 | 753  | 495  | 17 | 30.89 | 5.34 | 50.71 |
| chr3 | 174071226 | 174072109 | 884  | 452  | 19 | 31.87 | 6.16 | 49.75 |
| chr3 | 174095390 | 174096176 | 787  | 201  | 19 | 37.71 | 5.75 | 46.52 |
| chr3 | 174138345 | 174139131 | 787  | 505  | 18 | 33.21 | 4.52 | 49.15 |
| chr3 | 174494467 | 174495677 | 1211 | 738  | 26 | 38.59 | 8.63 | 46.1  |
| chr3 | 174896009 | 174897075 | 1067 | 643  | 25 | 42.49 | 5.75 | 47.34 |
| chr3 | 175369605 | 175370271 | 667  | 290  | 16 | 31.75 | 4.52 | 49.79 |
| chr3 | 175554714 | 175555770 | 1057 | 397  | 24 | 38.82 | 5.75 | 46.2  |
| chr3 | 175565725 | 175566481 | 757  | 319  | 17 | 30.65 | 5.34 | 51.07 |
| chr3 | 175784479 | 175785182 | 704  | 437  | 18 | 38.67 | 6.98 | 46.15 |
| chr3 | 175817781 | 175818642 | 862  | 605  | 21 | 41.99 | 5.34 | 47.06 |
| chr3 | 175924764 | 175926056 | 1293 | 634  | 32 | 59.44 | 6.57 | 54.97 |
| chr3 | 176003009 | 176004060 | 1052 | 539  | 22 | 31.08 | 4.93 | 50.76 |
| chr3 | 176081091 | 176082134 | 1044 | 434  | 21 | 31.48 | 5.75 | 49.97 |
| chr3 | 176519642 | 176520504 | 863  | 614  | 19 | 33.05 | 4.93 | 49.1  |
| chr3 | 176719068 | 176720547 | 1480 | 1226 | 34 | 52.37 | 4.11 | 50.85 |
| chr3 | 176759752 | 176761200 | 1449 | 639  | 32 | 43.13 | 4.89 | 47.31 |
| chr3 | 176785782 | 176787000 | 1219 | 688  | 27 | 35.12 | 4.79 | 47.37 |
| chr3 | 176795240 | 176796112 | 873  | 269  | 24 | 50.85 | 6.16 | 51.61 |
| chr3 | 176832172 | 176833707 | 1536 | 301  | 39 | 50.33 | 4.65 | 51.85 |
| chr3 | 176840697 | 176842922 | 2226 | 587  | 48 | 58.41 | 3.5  | 54.23 |

|      |           |           |      |      |     |       |      |       |
|------|-----------|-----------|------|------|-----|-------|------|-------|
| chr3 | 176913614 | 176914708 | 1095 | 638  | 30  | 42.26 | 4.98 | 47.27 |
| chr3 | 177221659 | 177222901 | 1243 | 591  | 25  | 33.2  | 4.93 | 49.09 |
| chr3 | 177507149 | 177508129 | 981  | 725  | 20  | 30.76 | 4.93 | 50.95 |
| chr3 | 178915308 | 178916486 | 1179 | 271  | 30  | 37.06 | 4.36 | 47.02 |
| chr3 | 179400640 | 179401555 | 916  | 291  | 24  | 33.19 | 4.85 | 49.1  |
| chr3 | 179430596 | 179432056 | 1461 | 857  | 33  | 30.99 | 3.2  | 50.49 |
| chr3 | 179480905 | 179482023 | 1119 | 482  | 25  | 39.5  | 5.34 | 47    |
| chr3 | 179517758 | 179519156 | 1399 | 629  | 27  | 32.9  | 5.3  | 49.35 |
| chr3 | 179720680 | 179721626 | 947  | 344  | 21  | 35    | 5.18 | 47.59 |
| chr3 | 179729376 | 179730778 | 1403 | 637  | 29  | 30.56 | 4.59 | 51.25 |
| chr3 | 179892673 | 179893891 | 1219 | 530  | 26  | 33.49 | 5.33 | 48.69 |
| chr3 | 180214412 | 180215245 | 834  | 289  | 19  | 34.75 | 4.93 | 47.59 |
| chr3 | 180581697 | 180583284 | 1588 | 1023 | 35  | 50.52 | 5.75 | 51.37 |
| chr3 | 180862361 | 180863311 | 951  | 555  | 22  | 36.46 | 4.52 | 47.14 |
| chr3 | 180878410 | 180879141 | 732  | 456  | 17  | 32.16 | 4.93 | 49.88 |
| chr3 | 181072208 | 181073101 | 894  | 237  | 19  | 31.32 | 4.11 | 50.32 |
| chr3 | 181090222 | 181091058 | 837  | 558  | 19  | 31.9  | 5.06 | 49.86 |
| chr3 | 181135899 | 181137226 | 1328 | 1057 | 30  | 43.63 | 5.39 | 47.69 |
| chr3 | 181498204 | 181500042 | 1839 | 1249 | 36  | 36.25 | 4.57 | 46.96 |
| chr3 | 182636246 | 182639208 | 2963 | 1313 | 69  | 31.51 | 2.69 | 49.89 |
| chr3 | 183072580 | 183074232 | 1653 | 775  | 44  | 43.49 | 3.14 | 48.01 |
| chr3 | 183233533 | 183235465 | 1933 | 1317 | 51  | 34.97 | 3.18 | 47.6  |
| chr3 | 183345699 | 183346910 | 1212 | 775  | 30  | 31.7  | 6.5  | 49.75 |
| chr3 | 184420864 | 184422339 | 1476 | 737  | 37  | 45.65 | 3.95 | 49.85 |
| chr3 | 184572039 | 184575171 | 3133 | 523  | 71  | 34.34 | 3.07 | 47.87 |
| chr3 | 184606832 | 184609665 | 2834 | 2117 | 67  | 34.51 | 3.58 | 47.7  |
| chr3 | 184799225 | 184800178 | 954  | 376  | 21  | 32.19 | 5.33 | 49.99 |
| chr3 | 184823169 | 184824111 | 943  | 669  | 23  | 31.05 | 4.11 | 50.6  |
| chr3 | 184868624 | 184869504 | 881  | 280  | 20  | 34.66 | 4.38 | 47.69 |
| chr3 | 185018757 | 185020696 | 1940 | 1061 | 53  | 54.57 | 5.61 | 53.98 |
| chr3 | 185025350 | 185027860 | 2511 | 1048 | 61  | 55.18 | 5.15 | 53.07 |
| chr3 | 185134885 | 185136814 | 1930 | 730  | 59  | 55    | 5.38 | 53.64 |
| chr3 | 185229638 | 185230707 | 1070 | 412  | 28  | 41.39 | 7.39 | 46.97 |
| chr3 | 185538246 | 185539921 | 1676 | 1013 | 36  | 36.07 | 4.5  | 47.04 |
| chr3 | 185705553 | 185706858 | 1306 | 680  | 32  | 36.81 | 4.98 | 46.8  |
| chr3 | 186062675 | 186064124 | 1450 | 575  | 33  | 33.42 | 4.61 | 48.69 |
| chr3 | 186156869 | 186158490 | 1622 | 1122 | 40  | 37.95 | 4.1  | 46.47 |
| chr3 | 186628875 | 186629818 | 944  | 558  | 21  | 35.81 | 4.83 | 47.13 |
| chr3 | 186760239 | 186764581 | 4343 | 533  | 105 | 36.88 | 3.65 | 46.73 |
| chr3 | 187199167 | 187200924 | 1758 | 1001 | 36  | 30.44 | 3.69 | 51.26 |
| chr3 | 187308546 | 187309994 | 1449 | 675  | 37  | 32.02 | 3.53 | 49.77 |
| chr3 | 187892440 | 187895139 | 2700 | 774  | 74  | 35.31 | 3.21 | 47.41 |
| chr3 | 188758542 | 188760375 | 1834 | 1271 | 43  | 31.73 | 4.28 | 49.76 |
| chr3 | 188840311 | 188841835 | 1525 | 421  | 32  | 33.78 | 3.48 | 48.67 |
| chr3 | 188846814 | 188848692 | 1879 | 569  | 50  | 41.98 | 5.27 | 47.11 |
| chr3 | 189189130 | 189190899 | 1770 | 1437 | 43  | 47.08 | 3.95 | 47.46 |
| chr3 | 189238744 | 189240743 | 2000 | 1229 | 49  | 44.96 | 3.57 | 48.79 |
| chr3 | 189294220 | 189295574 | 1355 | 930  | 30  | 46.98 | 4.52 | 47.65 |
| chr3 | 189324585 | 189326018 | 1434 | 805  | 35  | 36.64 | 4.67 | 47.01 |
| chr3 | 189568823 | 189569867 | 1045 | 410  | 28  | 44.4  | 5.14 | 48.59 |
| chr3 | 189615766 | 189617153 | 1388 | 790  | 36  | 56.83 | 5.89 | 52.7  |
| chr3 | 189712701 | 189713856 | 1156 | 603  | 29  | 44.97 | 5.77 | 48.92 |

|      |           |           |      |      |     |       |      |       |
|------|-----------|-----------|------|------|-----|-------|------|-------|
| chr3 | 189829962 | 189830835 | 874  | 339  | 20  | 32.72 | 4.95 | 49.38 |
| chr3 | 190429211 | 190430824 | 1614 | 576  | 35  | 45.66 | 4.33 | 49.81 |
| chr3 | 190587643 | 190588847 | 1205 | 407  | 28  | 41.07 | 4.52 | 46.41 |
| chr3 | 190608427 | 190609932 | 1506 | 589  | 34  | 34.63 | 3.66 | 47.73 |
| chr3 | 190618268 | 190619436 | 1169 | 590  | 27  | 39.9  | 6.85 | 46.58 |
| chr3 | 190692006 | 190693348 | 1343 | 684  | 34  | 50.48 | 5.83 | 51.89 |
| chr3 | 191282317 | 191283852 | 1536 | 1254 | 32  | 30.84 | 4.03 | 50.89 |
| chr3 | 191373485 | 191374652 | 1168 | 880  | 31  | 41.34 | 4.36 | 46.88 |
| chr3 | 191395046 | 191396038 | 993  | 702  | 24  | 36.69 | 5.96 | 46.95 |
| chr3 | 191415533 | 191416938 | 1406 | 593  | 32  | 46.3  | 5.33 | 48.48 |
| chr3 | 191434298 | 191435587 | 1290 | 761  | 26  | 34.24 | 4.08 | 47.9  |
| chr3 | 191722078 | 191723771 | 1694 | 1118 | 38  | 40.1  | 5.43 | 46.65 |
| chr3 | 191878469 | 191880572 | 2104 | 452  | 53  | 60.38 | 5.12 | 55.43 |
| chr3 | 191915064 | 191916241 | 1178 | 899  | 29  | 39.33 | 4.41 | 46.58 |
| chr3 | 191927385 | 191929128 | 1744 | 1067 | 35  | 33.07 | 5.05 | 49.21 |
| chr3 | 192081467 | 192082998 | 1532 | 630  | 38  | 51.37 | 4.9  | 51.62 |
| chr3 | 192183641 | 192185243 | 1603 | 254  | 42  | 36.79 | 4.51 | 46.82 |
| chr3 | 192219482 | 192220648 | 1167 | 769  | 26  | 33.5  | 4.74 | 48.66 |
| chr3 | 192520501 | 192522109 | 1609 | 859  | 39  | 41.33 | 4.71 | 46.89 |
| chr3 | 192601536 | 192602451 | 916  | 271  | 19  | 30.15 | 4.52 | 51.66 |
| chr3 | 192608543 | 192609804 | 1262 | 678  | 30  | 41.84 | 6.42 | 47.08 |
| chr3 | 192871114 | 192872200 | 1087 | 581  | 23  | 33.19 | 5.75 | 49.07 |
| chr3 | 192914747 | 192916747 | 2001 | 582  | 44  | 59.66 | 5.71 | 55.63 |
| chr3 | 193205788 | 193207756 | 1969 | 680  | 42  | 37.62 | 4.94 | 45.79 |
| chr3 | 194177439 | 194179973 | 2535 | 976  | 66  | 31.55 | 4.54 | 49.99 |
| chr3 | 194579197 | 194580572 | 1376 | 759  | 32  | 33.16 | 4.67 | 49.15 |
| chr3 | 195226414 | 195227996 | 1583 | 395  | 46  | 44.27 | 4.89 | 48.22 |
| chr3 | 195708150 | 195709304 | 1155 | 805  | 39  | 35.09 | 4.59 | 47.35 |
| chr3 | 196136237 | 196139273 | 3037 | 1806 | 76  | 37.98 | 3.87 | 46.39 |
| chr3 | 196244463 | 196246899 | 2437 | 532  | 56  | 30.17 | 4.21 | 51.65 |
| chr3 | 196484908 | 196486763 | 1856 | 586  | 50  | 40.23 | 3.83 | 46.74 |
| chr3 | 196538788 | 196540460 | 1673 | 311  | 39  | 34.55 | 3.3  | 47.8  |
| chr3 | 196553868 | 196556398 | 2531 | 1188 | 69  | 39.06 | 3.88 | 46.29 |
| chr3 | 196837659 | 196841612 | 3954 | 3492 | 103 | 38.42 | 3.57 | 46.34 |
| chr3 | 197236746 | 197237870 | 1125 | 509  | 30  | 42.99 | 4.85 | 47.36 |
| chr3 | 197411653 | 197413724 | 2072 | 1648 | 52  | 40.29 | 3.78 | 46.88 |
| chr3 | 197501102 | 197503327 | 2226 | 1197 | 62  | 32.34 | 3.85 | 49.9  |
| chr4 | 190712    | 191559    | 848  | 457  | 19  | 33.92 | 6.16 | 48.7  |
| chr4 | 590240    | 591120    | 881  | 286  | 21  | 36.46 | 4.57 | 47.11 |
| chr4 | 703364    | 704090    | 727  | 507  | 18  | 30.81 | 5.05 | 51.03 |
| chr4 | 966594    | 967494    | 901  | 599  | 19  | 30.95 | 3.7  | 50.5  |
| chr4 | 1180476   | 1182094   | 1619 | 480  | 32  | 33.78 | 4.44 | 48.7  |
| chr4 | 1381379   | 1382134   | 756  | 257  | 18  | 35.15 | 4.93 | 47.26 |
| chr4 | 1807100   | 1809210   | 2111 | 1701 | 60  | 33.12 | 4.07 | 49.16 |
| chr4 | 3580674   | 3581678   | 1005 | 280  | 24  | 41.88 | 6.57 | 47    |
| chr4 | 4188981   | 4190170   | 1190 | 501  | 25  | 35.76 | 5.34 | 47.09 |
| chr4 | 4931495   | 4932414   | 920  | 259  | 21  | 38.29 | 5.75 | 46.31 |
| chr4 | 5737182   | 5737773   | 592  | 314  | 17  | 42.25 | 6.57 | 47.17 |
| chr4 | 5915962   | 5917487   | 1526 | 262  | 31  | 35.81 | 4.14 | 47.18 |
| chr4 | 6792519   | 6793973   | 1455 | 479  | 33  | 41.99 | 4.84 | 47.04 |
| chr4 | 8447308   | 8448183   | 876  | 603  | 19  | 32.31 | 5.34 | 50.09 |
| chr4 | 10651805  | 10652581  | 777  | 491  | 18  | 33.82 | 4.93 | 48.82 |

|      |          |          |      |      |    |       |      |       |
|------|----------|----------|------|------|----|-------|------|-------|
| chr4 | 11437672 | 11438579 | 908  | 504  | 22 | 39.03 | 5.34 | 46.21 |
| chr4 | 11854592 | 11855471 | 880  | 544  | 19 | 32.09 | 5.34 | 49.72 |
| chr4 | 12704631 | 12705594 | 964  | 256  | 21 | 35.72 | 5.34 | 47.25 |
| chr4 | 12892617 | 12893506 | 890  | 674  | 20 | 35.75 | 4.52 | 47.03 |
| chr4 | 13016085 | 13017004 | 920  | 654  | 22 | 38.29 | 4.52 | 46.31 |
| chr4 | 13661754 | 13662737 | 984  | 271  | 22 | 34.6  | 4.11 | 47.68 |
| chr4 | 14940203 | 14941134 | 932  | 683  | 21 | 37.57 | 6.16 | 45.87 |
| chr4 | 15100385 | 15101215 | 831  | 607  | 20 | 39.42 | 5.34 | 47.03 |
| chr4 | 15640030 | 15640933 | 904  | 642  | 20 | 34.93 | 4.11 | 47.57 |
| chr4 | 16219233 | 16220034 | 802  | 496  | 18 | 32.32 | 4.52 | 50.01 |
| chr4 | 16223634 | 16224320 | 687  | 287  | 19 | 40.84 | 4.95 | 46.34 |
| chr4 | 16529777 | 16530695 | 919  | 637  | 20 | 34.07 | 4.93 | 48.23 |
| chr4 | 16614609 | 16615421 | 813  | 521  | 18 | 31.68 | 4.11 | 49.84 |
| chr4 | 17178140 | 17179059 | 920  | 635  | 26 | 33.12 | 5.42 | 49.17 |
| chr4 | 17533492 | 17534498 | 1007 | 389  | 22 | 33.37 | 6.16 | 48.68 |
| chr4 | 17699683 | 17700506 | 824  | 539  | 19 | 31.57 | 6.09 | 49.95 |
| chr4 | 17909140 | 17910490 | 1351 | 591  | 29 | 31.02 | 5.82 | 50.52 |
| chr4 | 18016111 | 18017297 | 1187 | 363  | 35 | 48.7  | 5.11 | 50.37 |
| chr4 | 18047926 | 18049731 | 1806 | 505  | 37 | 47.28 | 5.34 | 48.06 |
| chr4 | 18082365 | 18083198 | 834  | 336  | 18 | 30.49 | 5.34 | 51.26 |
| chr4 | 18114354 | 18115797 | 1444 | 1098 | 32 | 50.26 | 4.11 | 51.58 |
| chr4 | 18587207 | 18588309 | 1103 | 711  | 23 | 32.4  | 4.93 | 49.71 |
| chr4 | 18625991 | 18626895 | 905  | 627  | 19 | 30.73 | 4.11 | 50.98 |
| chr4 | 19586884 | 19587679 | 796  | 330  | 22 | 46.68 | 6.57 | 47.45 |
| chr4 | 19759790 | 19760612 | 823  | 617  | 18 | 31.11 | 4.52 | 50.68 |
| chr4 | 19819897 | 19820852 | 956  | 327  | 21 | 36.17 | 4.52 | 46.95 |
| chr4 | 19998187 | 19999147 | 961  | 717  | 22 | 35.89 | 4.93 | 46.97 |
| chr4 | 20319889 | 20321385 | 1497 | 1249 | 33 | 41.5  | 4.19 | 47.2  |
| chr4 | 20681548 | 20682919 | 1372 | 671  | 29 | 42.07 | 7.8  | 47.08 |
| chr4 | 20768775 | 20769506 | 732  | 291  | 17 | 32.16 | 6.16 | 49.88 |
| chr4 | 20871016 | 20872226 | 1211 | 556  | 26 | 38.59 | 6.16 | 46.1  |
| chr4 | 20995247 | 20996055 | 809  | 538  | 18 | 31.91 | 4.52 | 49.82 |
| chr4 | 21583977 | 21584530 | 554  | 277  | 15 | 34.09 | 5.69 | 48.19 |
| chr4 | 21832202 | 21833299 | 1098 | 715  | 26 | 44.96 | 6.57 | 48.79 |
| chr4 | 22655029 | 22655872 | 844  | 597  | 20 | 38.58 | 4.93 | 46.15 |
| chr4 | 22776559 | 22777500 | 942  | 664  | 20 | 32.8  | 4.11 | 49.45 |
| chr4 | 23244149 | 23245501 | 1353 | 671  | 28 | 36.36 | 6.69 | 47.19 |
| chr4 | 23278053 | 23278835 | 783  | 412  | 18 | 33.46 | 5.34 | 48.67 |
| chr4 | 23301355 | 23303090 | 1736 | 419  | 32 | 34.12 | 4.57 | 48.09 |
| chr4 | 23401544 | 23402270 | 727  | 521  | 19 | 38.44 | 5.39 | 46.41 |
| chr4 | 23640205 | 23641060 | 856  | 255  | 19 | 33.45 | 6.16 | 48.63 |
| chr4 | 23736922 | 23737782 | 861  | 250  | 19 | 33.16 | 4.93 | 49.11 |
| chr4 | 24682431 | 24683311 | 881  | 291  | 19 | 32.03 | 5.34 | 49.73 |
| chr4 | 24981273 | 24982309 | 1037 | 785  | 24 | 39.97 | 4.93 | 46.76 |
| chr4 | 25253544 | 25254402 | 859  | 598  | 19 | 33.28 | 4.93 | 48.91 |
| chr4 | 25666192 | 25668269 | 2078 | 495  | 51 | 35.13 | 3.16 | 47.34 |
| chr4 | 25677521 | 25678673 | 1153 | 400  | 29 | 33.45 | 5.47 | 48.61 |
| chr4 | 25818998 | 25820125 | 1128 | 646  | 24 | 34.58 | 5.71 | 47.73 |
| chr4 | 27226183 | 27226991 | 809  | 348  | 19 | 36.29 | 4.52 | 46.98 |
| chr4 | 28327512 | 28328183 | 672  | 249  | 16 | 31.43 | 4.93 | 50.09 |
| chr4 | 28550604 | 28551831 | 1228 | 582  | 26 | 37.72 | 6.16 | 46.53 |
| chr4 | 28811683 | 28812382 | 700  | 287  | 17 | 34.2  | 6.16 | 47.93 |

|      |          |          |      |      |    |       |      |       |
|------|----------|----------|------|------|----|-------|------|-------|
| chr4 | 29197646 | 29199075 | 1430 | 1034 | 31 | 35.25 | 4.2  | 47.3  |
| chr4 | 29352967 | 29354027 | 1061 | 285  | 21 | 30.64 | 4.93 | 51.13 |
| chr4 | 29432079 | 29432995 | 917  | 277  | 19 | 30.1  | 4.93 | 51.55 |
| chr4 | 29506777 | 29507626 | 850  | 332  | 21 | 42.81 | 6.57 | 47.45 |
| chr4 | 29638628 | 29639537 | 910  | 587  | 22 | 38.49 | 4.89 | 46.4  |
| chr4 | 30293141 | 30294366 | 1226 | 626  | 29 | 37.3  | 5.14 | 46.73 |
| chr4 | 30326162 | 30326916 | 755  | 226  | 17 | 30.77 | 4.93 | 50.95 |
| chr4 | 30451066 | 30451762 | 697  | 279  | 19 | 44.19 | 6.16 | 48.06 |
| chr4 | 31045486 | 31046452 | 967  | 289  | 20 | 31.48 | 4.52 | 50    |
| chr4 | 31656388 | 31658415 | 2028 | 416  | 43 | 62.96 | 4.93 | 53.39 |
| chr4 | 31841195 | 31842791 | 1597 | 979  | 37 | 58.21 | 4.93 | 54.11 |
| chr4 | 31896244 | 31897166 | 923  | 561  | 20 | 33.85 | 5.34 | 48.75 |
| chr4 | 32113061 | 32113963 | 903  | 578  | 20 | 34.99 | 5.75 | 47.57 |
| chr4 | 32339848 | 32341284 | 1437 | 962  | 32 | 50.65 | 5.34 | 51.45 |
| chr4 | 33565095 | 33566671 | 1577 | 819  | 39 | 68.14 | 6.16 | 53.28 |
| chr4 | 33836457 | 33837712 | 1256 | 728  | 28 | 44.25 | 6.57 | 48.35 |
| chr4 | 34345283 | 34346063 | 781  | 507  | 21 | 47.83 | 4.52 | 49.34 |
| chr4 | 35178964 | 35179947 | 984  | 410  | 23 | 34.46 | 5.71 | 47.79 |
| chr4 | 35320815 | 35321815 | 1001 | 341  | 21 | 33.69 | 4.93 | 48.59 |
| chr4 | 35622569 | 35623458 | 890  | 415  | 19 | 31.54 | 4.11 | 49.9  |
| chr4 | 35932993 | 35933772 | 780  | 378  | 18 | 32.72 | 5.64 | 49.38 |
| chr4 | 36175338 | 36176175 | 838  | 563  | 18 | 30.27 | 3.7  | 51.68 |
| chr4 | 36225186 | 36226513 | 1328 | 1075 | 30 | 48.5  | 4.11 | 49.59 |
| chr4 | 36744079 | 36744961 | 883  | 507  | 19 | 31.92 | 4.52 | 49.72 |
| chr4 | 36796359 | 36797193 | 835  | 273  | 18 | 30.44 | 5.75 | 51.32 |
| chr4 | 36891571 | 36892473 | 903  | 360  | 22 | 39.34 | 6.16 | 46.61 |
| chr4 | 37280437 | 37281391 | 955  | 425  | 21 | 33.32 | 5.06 | 48.75 |
| chr4 | 37432907 | 37433786 | 880  | 655  | 19 | 32.09 | 4.52 | 49.72 |
| chr4 | 37459667 | 37460580 | 914  | 480  | 20 | 33.36 | 4.43 | 48.69 |
| chr4 | 37557455 | 37558338 | 884  | 285  | 19 | 31.87 | 4.93 | 49.75 |
| chr4 | 38497396 | 38498971 | 1576 | 578  | 32 | 43.4  | 4.52 | 47.8  |
| chr4 | 38848537 | 38850130 | 1594 | 288  | 32 | 38.53 | 5.06 | 46.21 |
| chr4 | 39152320 | 39153499 | 1180 | 788  | 28 | 39.58 | 5.41 | 46.62 |
| chr4 | 39451712 | 39452593 | 882  | 290  | 20 | 34    | 4.33 | 48.55 |
| chr4 | 39651144 | 39652322 | 1179 | 433  | 24 | 32.5  | 5.75 | 49.39 |
| chr4 | 39831959 | 39832874 | 916  | 605  | 19 | 30.15 | 4.52 | 51.66 |
| chr4 | 39883010 | 39883955 | 946  | 485  | 24 | 38.28 | 4.74 | 46.31 |
| chr4 | 39973200 | 39975738 | 2539 | 2249 | 53 | 46.83 | 3.77 | 47.21 |
| chr4 | 40171821 | 40172698 | 878  | 271  | 20 | 31.87 | 5.64 | 49.75 |
| chr4 | 40195343 | 40197296 | 1954 | 845  | 58 | 42.07 | 5.9  | 47.12 |
| chr4 | 40390539 | 40391445 | 907  | 231  | 19 | 30.63 | 4.52 | 51.2  |
| chr4 | 40437653 | 40439017 | 1365 | 674  | 27 | 34.87 | 5.75 | 47.6  |
| chr4 | 40500646 | 40501263 | 618  | 327  | 16 | 30.8  | 4.84 | 51.01 |
| chr4 | 42079583 | 42080450 | 868  | 472  | 25 | 50.29 | 6.77 | 51.65 |
| chr4 | 42645793 | 42647225 | 1433 | 1026 | 39 | 34.85 | 3.1  | 47.61 |
| chr4 | 42757519 | 42758676 | 1158 | 558  | 25 | 37.4  | 5.34 | 46.73 |
| chr4 | 42949154 | 42950224 | 1071 | 335  | 23 | 34.01 | 6.16 | 48.53 |
| chr4 | 42969669 | 42970615 | 947  | 388  | 20 | 32.53 | 4.52 | 49.43 |
| chr4 | 43046244 | 43047315 | 1072 | 500  | 22 | 30.12 | 5.34 | 51.63 |
| chr4 | 43174778 | 43175603 | 826  | 543  | 18 | 30.94 | 4.52 | 50.56 |
| chr4 | 43222566 | 43223599 | 1034 | 634  | 23 | 31.76 | 4.57 | 49.86 |
| chr4 | 43715215 | 43715967 | 753  | 438  | 18 | 35.34 | 5.34 | 47.46 |

|      |          |          |      |      |    |       |      |       |
|------|----------|----------|------|------|----|-------|------|-------|
| chr4 | 44340737 | 44341675 | 939  | 321  | 21 | 37.16 | 4.52 | 46.85 |
| chr4 | 44592197 | 44593261 | 1065 | 563  | 21 | 30.45 | 4.11 | 51.29 |
| chr4 | 44970933 | 44971755 | 823  | 533  | 18 | 31.11 | 3.7  | 50.68 |
| chr4 | 45336543 | 45337371 | 829  | 510  | 18 | 30.77 | 4.52 | 50.95 |
| chr4 | 45376213 | 45377223 | 1011 | 613  | 21 | 31.54 | 4.38 | 49.95 |
| chr4 | 45772133 | 45773396 | 1264 | 523  | 25 | 32.23 | 6.16 | 50.03 |
| chr4 | 46068025 | 46069739 | 1715 | 1381 | 35 | 44.2  | 4.52 | 48.02 |
| chr4 | 46741899 | 46743086 | 1188 | 540  | 26 | 39.81 | 5.34 | 46.65 |
| chr4 | 46808300 | 46810156 | 1857 | 1297 | 33 | 31.63 | 4.93 | 49.9  |
| chr4 | 46900603 | 46901385 | 783  | 505  | 19 | 37.98 | 4.93 | 46.38 |
| chr4 | 46986496 | 46987412 | 917  | 637  | 20 | 34.18 | 5.34 | 47.96 |
| chr4 | 47311669 | 47312565 | 897  | 622  | 20 | 35.33 | 4.93 | 47.42 |
| chr4 | 47342877 | 47343739 | 863  | 573  | 19 | 33.05 | 4.11 | 49.1  |
| chr4 | 47355846 | 47356755 | 910  | 381  | 22 | 38.91 | 4.93 | 46.27 |
| chr4 | 47414883 | 47415803 | 921  | 571  | 20 | 30.1  | 4.19 | 51.56 |
| chr4 | 47554962 | 47556257 | 1296 | 635  | 28 | 41.57 | 5.71 | 47.21 |
| chr4 | 47638167 | 47639296 | 1130 | 445  | 27 | 35.32 | 5.14 | 47.42 |
| chr4 | 48089545 | 48090731 | 1187 | 560  | 27 | 43.99 | 5.34 | 47.98 |
| chr4 | 48111252 | 48112609 | 1358 | 656  | 30 | 38.15 | 4.01 | 46.28 |
| chr4 | 48123175 | 48124368 | 1194 | 809  | 27 | 43.59 | 6.57 | 47.67 |
| chr4 | 48321334 | 48322153 | 820  | 233  | 18 | 31.28 | 4.11 | 50.36 |
| chr4 | 48430566 | 48431888 | 1323 | 617  | 26 | 31.35 | 4.78 | 50.22 |
| chr4 | 48666234 | 48667140 | 907  | 377  | 20 | 30.86 | 4.19 | 50.94 |
| chr4 | 48765705 | 48766591 | 887  | 234  | 23 | 30.22 | 3.81 | 51.74 |
| chr4 | 48804980 | 48805874 | 895  | 283  | 19 | 31.27 | 4.52 | 50.46 |
| chr4 | 49036126 | 49037374 | 1249 | 618  | 31 | 57.77 | 9.04 | 53.23 |
| chr4 | 52705234 | 52707068 | 1835 | 513  | 40 | 30.97 | 4.24 | 50.44 |
| chr4 | 53171263 | 53172255 | 993  | 750  | 20 | 30.16 | 4.93 | 51.68 |
| chr4 | 53576963 | 53579168 | 2206 | 1710 | 46 | 31.69 | 4.05 | 49.74 |
| chr4 | 53600063 | 53600883 | 821  | 486  | 19 | 31.75 | 5.71 | 49.78 |
| chr4 | 54243181 | 54246582 | 3402 | 1289 | 95 | 45.37 | 4.49 | 49.56 |
| chr4 | 54265478 | 54267402 | 1925 | 644  | 40 | 30.08 | 4.71 | 51.54 |
| chr4 | 54307731 | 54308985 | 1255 | 657  | 30 | 32.88 | 5.6  | 49.33 |
| chr4 | 54312888 | 54313808 | 921  | 446  | 22 | 33.46 | 4.89 | 48.59 |
| chr4 | 54422870 | 54423701 | 832  | 599  | 18 | 30.6  | 5.34 | 51.25 |
| chr4 | 54610916 | 54612264 | 1349 | 682  | 29 | 33.7  | 4.99 | 48.59 |
| chr4 | 54638671 | 54639592 | 922  | 636  | 22 | 37.76 | 4.48 | 46.74 |
| chr4 | 54818050 | 54818889 | 840  | 365  | 19 | 34.39 | 5.34 | 47.73 |
| chr4 | 54840417 | 54841305 | 889  | 275  | 20 | 35.81 | 4.93 | 47.08 |
| chr4 | 55050493 | 55051729 | 1237 | 957  | 31 | 44.15 | 4.45 | 48.09 |
| chr4 | 55138341 | 55139004 | 664  | 266  | 16 | 31.95 | 4.93 | 49.78 |
| chr4 | 55177045 | 55177672 | 628  | 285  | 18 | 44.56 | 6.98 | 48.79 |
| chr4 | 55368489 | 55369621 | 1133 | 653  | 23 | 30.96 | 5.75 | 50.53 |
| chr4 | 55497005 | 55497830 | 826  | 500  | 19 | 31.45 | 6.47 | 50.04 |
| chr4 | 55591870 | 55592505 | 636  | 350  | 18 | 40.51 | 5.77 | 46.96 |
| chr4 | 55592638 | 55594463 | 1826 | 1535 | 47 | 58.06 | 4.94 | 53.17 |
| chr4 | 55600669 | 55601387 | 719  | 289  | 21 | 48.88 | 6.93 | 50.54 |
| chr4 | 55856110 | 55857678 | 1569 | 549  | 32 | 43.74 | 4.93 | 47.89 |
| chr4 | 55970677 | 55971377 | 701  | 288  | 17 | 30.67 | 4.57 | 51.06 |
| chr4 | 56628538 | 56629642 | 1105 | 719  | 24 | 36.2  | 6.98 | 46.93 |
| chr4 | 56709262 | 56710533 | 1272 | 921  | 28 | 43.37 | 4.93 | 47.92 |
| chr4 | 56743415 | 56744533 | 1119 | 605  | 25 | 35.53 | 5.77 | 47.19 |

|      |          |          |      |      |    |       |      |       |
|------|----------|----------|------|------|----|-------|------|-------|
| chr4 | 57333048 | 57334089 | 1042 | 395  | 25 | 30.65 | 5.6  | 51.1  |
| chr4 | 57444349 | 57445644 | 1296 | 618  | 31 | 50.41 | 5.45 | 51.86 |
| chr4 | 57496186 | 57497132 | 947  | 448  | 20 | 32.53 | 4.52 | 49.43 |
| chr4 | 57607480 | 57608361 | 882  | 246  | 20 | 36.22 | 4.11 | 46.99 |
| chr4 | 57790825 | 57791652 | 828  | 393  | 20 | 39.62 | 5.34 | 46.59 |
| chr4 | 58788647 | 58789510 | 864  | 602  | 19 | 32.99 | 4.52 | 49.23 |
| chr4 | 59238784 | 59239660 | 877  | 475  | 20 | 36.52 | 4.93 | 46.89 |
| chr4 | 59618970 | 59619861 | 892  | 601  | 20 | 35.63 | 5.34 | 47.33 |
| chr4 | 60190672 | 60191377 | 706  | 285  | 18 | 38.53 | 6.16 | 46.17 |
| chr4 | 60837375 | 60838414 | 1040 | 494  | 22 | 31.68 | 4.93 | 49.85 |
| chr4 | 60995117 | 60995893 | 777  | 290  | 20 | 38.92 | 4.19 | 46.25 |
| chr4 | 61190704 | 61191316 | 613  | 335  | 15 | 30.66 | 4.93 | 51.05 |
| chr4 | 61988180 | 61989013 | 834  | 255  | 18 | 30.49 | 3.7  | 51.26 |
| chr4 | 62654710 | 62655472 | 763  | 348  | 19 | 39.33 | 5.34 | 46.6  |
| chr4 | 62874116 | 62875147 | 1032 | 289  | 23 | 36.07 | 5.34 | 46.98 |
| chr4 | 62910329 | 62911319 | 991  | 735  | 23 | 38.39 | 4.93 | 46.31 |
| chr4 | 63679180 | 63680052 | 873  | 328  | 21 | 41.26 | 5.75 | 46.87 |
| chr4 | 64008364 | 64010005 | 1642 | 1382 | 33 | 43.96 | 4.11 | 47.77 |
| chr4 | 64102797 | 64104068 | 1272 | 552  | 26 | 35.54 | 5.34 | 47.21 |
| chr4 | 64164635 | 64165936 | 1302 | 405  | 32 | 58.85 | 5.34 | 52.76 |
| chr4 | 64470395 | 64471324 | 930  | 323  | 20 | 33.46 | 4.93 | 48.63 |
| chr4 | 64715893 | 64716917 | 1025 | 337  | 23 | 36.46 | 4.93 | 47.18 |
| chr4 | 64772776 | 64773673 | 898  | 289  | 21 | 35.41 | 4.57 | 47.52 |
| chr4 | 64789732 | 64790394 | 663  | 386  | 16 | 32.01 | 5.34 | 49.76 |
| chr4 | 64970461 | 64971101 | 641  | 381  | 17 | 38.36 | 6.16 | 46.4  |
| chr4 | 65013287 | 65014271 | 985  | 702  | 26 | 52.43 | 5.34 | 50.46 |
| chr4 | 66071318 | 66072364 | 1047 | 443  | 21 | 31.33 | 4.11 | 50.27 |
| chr4 | 66243056 | 66244101 | 1046 | 602  | 22 | 31.38 | 5.34 | 50.17 |
| chr4 | 66325151 | 66325934 | 784  | 376  | 21 | 47.6  | 6.57 | 48.99 |
| chr4 | 66370414 | 66371293 | 880  | 561  | 21 | 40.81 | 4.93 | 46.37 |
| chr4 | 66449930 | 66450839 | 910  | 550  | 21 | 34.7  | 4.57 | 47.79 |
| chr4 | 66452649 | 66453526 | 878  | 562  | 19 | 32.2  | 4.11 | 49.92 |
| chr4 | 66496899 | 66497684 | 786  | 401  | 18 | 32.36 | 5.24 | 49.87 |
| chr4 | 66617056 | 66617674 | 619  | 284  | 16 | 35.03 | 5.34 | 47.47 |
| chr4 | 67038840 | 67040249 | 1410 | 739  | 30 | 44.03 | 6.57 | 48.06 |
| chr4 | 67042134 | 67042900 | 767  | 262  | 17 | 30.07 | 5.75 | 51.5  |
| chr4 | 67319737 | 67320494 | 758  | 426  | 17 | 30.59 | 5.75 | 51.24 |
| chr4 | 67489071 | 67489803 | 733  | 446  | 17 | 32.1  | 4.93 | 49.7  |
| chr4 | 67512106 | 67513803 | 1698 | 1133 | 32 | 37.86 | 4.93 | 46.76 |
| chr4 | 67618188 | 67620153 | 1966 | 585  | 34 | 40.26 | 5.75 | 46.75 |
| chr4 | 67653536 | 67654035 | 500  | 250  | 16 | 48.45 | 6.57 | 49.14 |
| chr4 | 67696598 | 67697505 | 908  | 288  | 19 | 30.57 | 4.93 | 51.17 |
| chr4 | 67917711 | 67918656 | 946  | 273  | 20 | 32.59 | 4.11 | 49.31 |
| chr4 | 67941051 | 67941894 | 844  | 563  | 21 | 38.84 | 4.95 | 46.22 |
| chr4 | 68242845 | 68243990 | 1146 | 442  | 25 | 38.03 | 4.93 | 46.43 |
| chr4 | 68257905 | 68259433 | 1529 | 530  | 30 | 38.24 | 4.52 | 46.31 |
| chr4 | 68290792 | 68292226 | 1435 | 647  | 29 | 38.95 | 6.98 | 46.16 |
| chr4 | 69555157 | 69556995 | 1839 | 855  | 36 | 42.19 | 4.52 | 47.1  |
| chr4 | 69973283 | 69974937 | 1655 | 1374 | 33 | 39.73 | 4.52 | 46.58 |
| chr4 | 70079858 | 70080840 | 983  | 715  | 23 | 38.86 | 4.52 | 46.27 |
| chr4 | 70229967 | 70231049 | 1083 | 261  | 24 | 37.38 | 4.52 | 46.61 |
| chr4 | 70333439 | 70334204 | 766  | 214  | 18 | 34.51 | 4.93 | 47.68 |

|      |          |          |      |     |    |       |      |       |
|------|----------|----------|------|-----|----|-------|------|-------|
| chr4 | 70370796 | 70371684 | 889  | 599 | 21 | 35.96 | 5.33 | 47    |
| chr4 | 70436358 | 70437262 | 905  | 658 | 20 | 34.87 | 4.93 | 47.62 |
| chr4 | 70547613 | 70548376 | 764  | 434 | 18 | 34.64 | 4.93 | 47.73 |
| chr4 | 70746602 | 70747834 | 1233 | 960 | 30 | 48.33 | 4.19 | 49.25 |
| chr4 | 70755477 | 70756228 | 752  | 451 | 17 | 30.95 | 4.52 | 50.53 |
| chr4 | 70967905 | 70969199 | 1295 | 687 | 30 | 50.43 | 5.34 | 52    |
| chr4 | 71111658 | 71112834 | 1177 | 348 | 31 | 62.13 | 5.71 | 54.2  |
| chr4 | 71553333 | 71554787 | 1455 | 871 | 34 | 30.01 | 4.51 | 51.48 |
| chr4 | 71860348 | 71861506 | 1159 | 554 | 30 | 38.88 | 4.71 | 46.25 |
| chr4 | 71914838 | 71915576 | 739  | 506 | 17 | 30.86 | 4.83 | 50.85 |
| chr4 | 72108707 | 72109745 | 1039 | 488 | 22 | 31.73 | 5.34 | 49.74 |
| chr4 | 72113291 | 72114141 | 851  | 285 | 21 | 42.74 | 4.93 | 47.45 |
| chr4 | 72905701 | 72906320 | 620  | 335 | 19 | 50.74 | 7.39 | 51.53 |
| chr4 | 73058704 | 73059640 | 937  | 670 | 21 | 37.27 | 4.52 | 46.57 |
| chr4 | 73604922 | 73606176 | 1255 | 514 | 25 | 32.64 | 6.16 | 49.33 |
| chr4 | 73724126 | 73724887 | 762  | 438 | 17 | 30.36 | 4.11 | 51.65 |
| chr4 | 73946396 | 73947817 | 1422 | 761 | 31 | 44.14 | 5.12 | 48.13 |
| chr4 | 73984689 | 73985592 | 904  | 697 | 20 | 33.93 | 4.03 | 48.74 |
| chr4 | 74005186 | 74006127 | 942  | 456 | 24 | 36.08 | 5.59 | 46.94 |
| chr4 | 74372077 | 74373122 | 1046 | 508 | 21 | 31.38 | 5.75 | 50.17 |
| chr4 | 74680913 | 74681655 | 743  | 493 | 19 | 40.73 | 4.93 | 46.57 |
| chr4 | 74802610 | 74803632 | 1023 | 611 | 24 | 40.79 | 7.39 | 46.36 |
| chr4 | 75006013 | 75006779 | 767  | 287 | 18 | 34.45 | 6.16 | 47.77 |
| chr4 | 75741049 | 75741876 | 828  | 289 | 18 | 30.83 | 5.75 | 50.88 |
| chr4 | 75811231 | 75812125 | 895  | 622 | 24 | 42.29 | 4.79 | 47.31 |
| chr4 | 76041288 | 76042389 | 1102 | 283 | 24 | 32.01 | 4.57 | 49.78 |
| chr4 | 76584222 | 76586381 | 2160 | 441 | 51 | 39.02 | 4.28 | 46.18 |
| chr4 | 81413165 | 81414166 | 1002 | 511 | 21 | 33.63 | 5.75 | 48.79 |
| chr4 | 84695329 | 84696036 | 708  | 442 | 17 | 30.23 | 5.33 | 51.73 |
| chr4 | 85225998 | 85226840 | 843  | 576 | 19 | 33.84 | 4.08 | 48.74 |
| chr4 | 86036119 | 86036824 | 706  | 303 | 17 | 33.81 | 5.34 | 48.84 |
| chr4 | 86327066 | 86328269 | 1204 | 634 | 25 | 35.06 | 7.39 | 47.4  |
| chr4 | 86663190 | 86664248 | 1059 | 669 | 25 | 35.56 | 4.37 | 47.16 |
| chr4 | 86792702 | 86793589 | 888  | 611 | 20 | 35.86 | 5.34 | 47.02 |
| chr4 | 86859141 | 86860374 | 1234 | 654 | 28 | 40.97 | 5.77 | 46.2  |
| chr4 | 87403623 | 87404442 | 820  | 288 | 18 | 31.28 | 6.98 | 50.36 |
| chr4 | 87875373 | 87876090 | 718  | 270 | 18 | 37.69 | 4.52 | 46.44 |
| chr4 | 87973320 | 87974871 | 1552 | 274 | 35 | 52.47 | 5.34 | 50.47 |
| chr4 | 88071020 | 88072595 | 1576 | 782 | 36 | 52.51 | 4.78 | 50.47 |
| chr4 | 88142793 | 88144112 | 1320 | 593 | 29 | 32.47 | 4.79 | 49.48 |
| chr4 | 88257219 | 88258080 | 862  | 586 | 19 | 33.1  | 4.11 | 49.14 |
| chr4 | 88855129 | 88856524 | 1396 | 561 | 31 | 38.3  | 3.57 | 46.41 |
| chr4 | 88983385 | 88984118 | 734  | 464 | 18 | 36.59 | 5.34 | 46.9  |
| chr4 | 89287147 | 89288150 | 1004 | 284 | 24 | 31.33 | 5.14 | 50.26 |
| chr4 | 89554456 | 89555347 | 892  | 409 | 20 | 35.63 | 5.34 | 47.33 |
| chr4 | 90299379 | 90300793 | 1415 | 253 | 31 | 34.52 | 3.77 | 47.74 |
| chr4 | 90493586 | 90494275 | 690  | 411 | 17 | 34.87 | 5.75 | 47.63 |
| chr4 | 90659720 | 90660887 | 1168 | 508 | 25 | 36.88 | 6.57 | 46.69 |
| chr4 | 90837630 | 90838545 | 916  | 379 | 22 | 38.54 | 6.57 | 46.22 |
| chr4 | 90850514 | 90851571 | 1058 | 558 | 23 | 34.68 | 4.52 | 47.77 |
| chr4 | 91030826 | 91031943 | 1118 | 452 | 27 | 42.12 | 7.53 | 46.84 |
| chr4 | 91441096 | 91442012 | 917  | 255 | 20 | 30.31 | 5.71 | 51.55 |



|      |           |           |      |      |    |       |      |       |
|------|-----------|-----------|------|------|----|-------|------|-------|
| chr4 | 91769769  | 91770664  | 896  | 281  | 19 | 31.21 | 4.11 | 50.51 |
| chr4 | 91799200  | 91800040  | 841  | 227  | 18 | 30.11 | 4.93 | 51.58 |
| chr4 | 91858543  | 91859483  | 941  | 565  | 20 | 32.86 | 5.34 | 49.3  |
| chr4 | 91873746  | 91874775  | 1030 | 778  | 22 | 32.18 | 4.93 | 49.95 |
| chr4 | 92006966  | 92008086  | 1121 | 337  | 31 | 41.1  | 5.66 | 46.32 |
| chr4 | 92076610  | 92077842  | 1233 | 442  | 30 | 36.53 | 4.2  | 46.92 |
| chr4 | 92430301  | 92431260  | 960  | 538  | 28 | 34.61 | 4.62 | 47.74 |
| chr4 | 92538213  | 92540006  | 1794 | 1202 | 47 | 71.4  | 7.29 | 52.83 |
| chr4 | 92677829  | 92678868  | 1040 | 654  | 21 | 31.68 | 5.34 | 49.85 |
| chr4 | 93108063  | 93109144  | 1082 | 633  | 23 | 33.44 | 5.34 | 48.62 |
| chr4 | 93485581  | 93486566  | 986  | 554  | 21 | 30.48 | 4.57 | 51.28 |
| chr4 | 93808104  | 93809118  | 1015 | 545  | 23 | 37.02 | 4.52 | 46.97 |
| chr4 | 93956882  | 93957872  | 991  | 589  | 20 | 30.26 | 5.75 | 51.67 |
| chr4 | 94247982  | 94248987  | 1006 | 288  | 22 | 33.42 | 4.93 | 48.69 |
| chr4 | 94410432  | 94411307  | 876  | 628  | 19 | 32.31 | 4.52 | 50.09 |
| chr4 | 94780730  | 94781621  | 892  | 286  | 19 | 31.43 | 4.93 | 50    |
| chr4 | 95271620  | 95272445  | 826  | 253  | 20 | 35.65 | 4.19 | 47.29 |
| chr4 | 95557675  | 95558659  | 985  | 362  | 20 | 30.56 | 4.93 | 51.26 |
| chr4 | 95775685  | 95777231  | 1547 | 527  | 31 | 37.19 | 3.89 | 46.88 |
| chr4 | 95792728  | 95794054  | 1327 | 691  | 27 | 36.65 | 4.93 | 46.99 |
| chr4 | 95841742  | 95842632  | 891  | 613  | 21 | 40.1  | 5.75 | 46.56 |
| chr4 | 96478969  | 96479909  | 941  | 442  | 23 | 41.42 | 6.57 | 47.09 |
| chr4 | 97154124  | 97155726  | 1603 | 427  | 35 | 49.73 | 4.52 | 51.97 |
| chr4 | 97354592  | 97355628  | 1037 | 357  | 21 | 31.83 | 5.34 | 49.81 |
| chr4 | 97504531  | 97505387  | 857  | 599  | 19 | 33.39 | 4.52 | 48.72 |
| chr4 | 97894348  | 97895705  | 1358 | 663  | 27 | 35.19 | 5.75 | 47.18 |
| chr4 | 98449593  | 98450500  | 908  | 580  | 19 | 30.57 | 6.16 | 51.17 |
| chr4 | 98759226  | 98760250  | 1025 | 656  | 24 | 30.2  | 4.79 | 51.76 |
| chr4 | 98761865  | 98762802  | 938  | 557  | 20 | 33.02 | 5.34 | 49.11 |
| chr4 | 99481783  | 99482805  | 1023 | 289  | 23 | 36.57 | 5.34 | 46.9  |
| chr4 | 99549884  | 99550709  | 826  | 539  | 19 | 35.24 | 4.52 | 47.26 |
| chr4 | 99614260  | 99615160  | 901  | 699  | 20 | 35.1  | 4.11 | 47.35 |
| chr4 | 99661133  | 99662145  | 1013 | 724  | 21 | 33.06 | 4.93 | 49.12 |
| chr4 | 99761805  | 99763482  | 1678 | 1399 | 32 | 38.72 | 4.93 | 46.26 |
| chr4 | 100299241 | 100300282 | 1042 | 645  | 21 | 30.58 | 3.63 | 51.21 |
| chr4 | 100808149 | 100809190 | 1042 | 374  | 25 | 32.88 | 5.48 | 49.34 |
| chr4 | 100842892 | 100843828 | 937  | 285  | 21 | 36.21 | 4.43 | 46.94 |
| chr4 | 100863875 | 100865459 | 1585 | 466  | 40 | 31.44 | 3.42 | 49.99 |
| chr4 | 100868005 | 100870293 | 2289 | 655  | 51 | 32.14 | 3.37 | 49.89 |
| chr4 | 101395306 | 101396319 | 1014 | 397  | 22 | 33    | 5.75 | 49.18 |
| chr4 | 101401774 | 101402968 | 1195 | 754  | 24 | 31.75 | 5.75 | 49.81 |
| chr4 | 101689848 | 101690697 | 850  | 449  | 19 | 33.8  | 4.93 | 48.83 |
| chr4 | 101901147 | 101901729 | 583  | 291  | 15 | 32.66 | 6.16 | 49.32 |
| chr4 | 102056428 | 102057374 | 947  | 617  | 23 | 41.04 | 5.34 | 46.42 |
| chr4 | 102320671 | 102321893 | 1223 | 624  | 25 | 34.14 | 5.75 | 47.98 |
| chr4 | 102909325 | 102910518 | 1194 | 534  | 24 | 31.8  | 5.34 | 49.8  |
| chr4 | 103121797 | 103122473 | 677  | 356  | 16 | 31.11 | 4.52 | 50.68 |
| chr4 | 103314113 | 103315135 | 1023 | 259  | 21 | 32.15 | 4.48 | 49.95 |
| chr4 | 103683840 | 103684821 | 982  | 339  | 25 | 30.83 | 4.67 | 50.86 |
| chr4 | 104273842 | 104275553 | 1712 | 1305 | 34 | 35.91 | 4.23 | 47.04 |
| chr4 | 104471599 | 104473253 | 1655 | 1297 | 33 | 39.73 | 4.93 | 46.58 |
| chr4 | 104528409 | 104530340 | 1932 | 1389 | 36 | 38.32 | 6.57 | 46.46 |

|      |           |           |      |     |    |       |      |       |
|------|-----------|-----------|------|-----|----|-------|------|-------|
| chr4 | 104624259 | 104625285 | 1027 | 604 | 23 | 36.35 | 5.75 | 47.09 |
| chr4 | 104818387 | 104819457 | 1071 | 681 | 21 | 30.16 | 4.11 | 51.62 |
| chr4 | 105152423 | 105153279 | 857  | 589 | 20 | 37.76 | 4.93 | 46.7  |
| chr4 | 105191564 | 105192499 | 936  | 449 | 21 | 33.19 | 4.57 | 49.08 |
| chr4 | 105236796 | 105237480 | 685  | 404 | 16 | 30.61 | 5.34 | 51.15 |
| chr4 | 105777234 | 105778638 | 1405 | 679 | 32 | 52.48 | 4.52 | 50.62 |
| chr4 | 105975115 | 105976004 | 890  | 630 | 27 | 59.22 | 6.47 | 53.72 |
| chr4 | 106082923 | 106084503 | 1581 | 764 | 36 | 32.61 | 5.92 | 49.39 |
| chr4 | 106155355 | 106156503 | 1149 | 418 | 25 | 31.44 | 4.42 | 50    |
| chr4 | 106340596 | 106341861 | 1266 | 735 | 25 | 31.72 | 6.12 | 49.73 |
| chr4 | 106644550 | 106645176 | 627  | 316 | 16 | 31.12 | 4.95 | 50.68 |
| chr4 | 107088981 | 107090270 | 1290 | 574 | 29 | 32.68 | 4.36 | 49.38 |
| chr4 | 107143242 | 107144310 | 1069 | 710 | 26 | 46.76 | 5.34 | 47.51 |
| chr4 | 107435294 | 107436516 | 1223 | 697 | 24 | 30.48 | 6.57 | 51.3  |
| chr4 | 107501849 | 107502577 | 729  | 440 | 17 | 32.34 | 4.93 | 49.9  |
| chr4 | 107503970 | 107504904 | 935  | 549 | 21 | 36.98 | 6.12 | 46.97 |
| chr4 | 107851891 | 107853398 | 1508 | 745 | 36 | 59.21 | 6.57 | 53.87 |
| chr4 | 108280083 | 108281184 | 1102 | 823 | 24 | 36.36 | 4.52 | 47.17 |
| chr4 | 108372493 | 108373679 | 1187 | 794 | 29 | 52.72 | 5.34 | 50.65 |
| chr4 | 108875414 | 108876158 | 745  | 484 | 17 | 31.37 | 5.75 | 50.22 |
| chr4 | 109530494 | 109531483 | 990  | 504 | 20 | 30.31 | 5.34 | 51.56 |
| chr4 | 110166527 | 110167397 | 871  | 278 | 20 | 36.89 | 5.34 | 46.68 |
| chr4 | 110215592 | 110216451 | 860  | 580 | 20 | 37.57 | 4.52 | 45.96 |
| chr4 | 111799775 | 111800495 | 721  | 276 | 19 | 42.35 | 5.75 | 47.04 |
| chr4 | 111872059 | 111873155 | 1097 | 561 | 25 | 38.81 | 5.58 | 46.13 |
| chr4 | 111943600 | 111944251 | 652  | 402 | 17 | 33.95 | 4.95 | 48.66 |
| chr4 | 111973942 | 111974877 | 936  | 490 | 20 | 33.13 | 5.34 | 49.14 |
| chr4 | 112380753 | 112381921 | 1169 | 654 | 26 | 40.85 | 4.93 | 46.35 |
| chr4 | 112462591 | 112463772 | 1182 | 496 | 24 | 32.36 | 6.16 | 49.81 |
| chr4 | 112523581 | 112524206 | 626  | 374 | 16 | 34.2  | 6.12 | 47.9  |
| chr4 | 112649935 | 112650949 | 1015 | 728 | 23 | 37.02 | 4.93 | 46.97 |
| chr4 | 112682826 | 112683663 | 838  | 581 | 18 | 30.27 | 4.93 | 51.68 |
| chr4 | 112806087 | 112806847 | 761  | 539 | 19 | 35.51 | 3.81 | 47.26 |
| chr4 | 112936129 | 112937194 | 1066 | 427 | 25 | 42.55 | 4.93 | 47.12 |
| chr4 | 113713860 | 113714872 | 1013 | 734 | 26 | 50.46 | 5.34 | 51.81 |
| chr4 | 113927953 | 113928685 | 733  | 451 | 17 | 31.76 | 6.12 | 49.85 |
| chr4 | 114209790 | 114211336 | 1547 | 760 | 36 | 51.15 | 7.31 | 51.72 |
| chr4 | 114380081 | 114381583 | 1503 | 655 | 35 | 46.92 | 5.58 | 47.8  |
| chr4 | 114711643 | 114712412 | 770  | 243 | 19 | 37.84 | 4.83 | 46.74 |
| chr4 | 115227682 | 115228423 | 742  | 282 | 17 | 31.55 | 4.52 | 49.94 |
| chr4 | 115358698 | 115360011 | 1314 | 778 | 27 | 37.28 | 5.75 | 46.67 |
| chr4 | 115424592 | 115427242 | 2651 | 446 | 49 | 52.26 | 4.52 | 51.14 |
| chr4 | 115496945 | 115497718 | 774  | 495 | 21 | 48.37 | 6.98 | 49.1  |
| chr4 | 115819628 | 115820380 | 753  | 266 | 17 | 30.03 | 4.43 | 51.48 |
| chr4 | 115842708 | 115843509 | 802  | 547 | 18 | 32.32 | 4.52 | 50.01 |
| chr4 | 116048305 | 116049519 | 1215 | 576 | 26 | 33.69 | 4.95 | 48.6  |
| chr4 | 116244013 | 116245277 | 1265 | 603 | 29 | 47.93 | 8.22 | 49.24 |
| chr4 | 116323614 | 116324682 | 1069 | 783 | 25 | 37.61 | 5.33 | 45.73 |
| chr4 | 116403515 | 116404536 | 1022 | 732 | 26 | 43.91 | 4.89 | 47.72 |
| chr4 | 116655009 | 116656071 | 1063 | 404 | 24 | 38.48 | 5.34 | 46.39 |
| chr4 | 116660159 | 116660968 | 810  | 598 | 19 | 36.23 | 4.52 | 46.97 |
| chr4 | 116661454 | 116662427 | 974  | 406 | 23 | 39.39 | 5.34 | 46.94 |

|      |           |           |      |      |    |       |      |       |
|------|-----------|-----------|------|------|----|-------|------|-------|
| chr4 | 116701087 | 116702595 | 1509 | 505  | 30 | 34.7  | 5    | 47.8  |
| chr4 | 116834960 | 116835974 | 1015 | 283  | 23 | 37.02 | 5.34 | 46.97 |
| chr4 | 116847721 | 116848656 | 936  | 270  | 20 | 33.13 | 5.75 | 49.14 |
| chr4 | 116930989 | 116932189 | 1201 | 397  | 24 | 31.48 | 4.52 | 50.01 |
| chr4 | 116975323 | 116976127 | 805  | 518  | 18 | 32.14 | 6.16 | 49.83 |
| chr4 | 117005238 | 117006165 | 928  | 649  | 23 | 39.73 | 5.12 | 46.63 |
| chr4 | 117329781 | 117330934 | 1154 | 527  | 24 | 33.71 | 5.75 | 48.61 |
| chr4 | 117896233 | 117897352 | 1120 | 401  | 25 | 39.44 | 5.75 | 47.06 |
| chr4 | 118006930 | 118007727 | 798  | 374  | 18 | 32.55 | 5.34 | 49.31 |
| chr4 | 118339291 | 118340241 | 951  | 258  | 21 | 36.46 | 4.11 | 47.14 |
| chr4 | 118634740 | 118635905 | 1166 | 489  | 26 | 41.01 | 6.16 | 46.25 |
| chr4 | 118961219 | 118962651 | 1433 | 469  | 34 | 40.45 | 5.82 | 46.87 |
| chr4 | 119068723 | 119070458 | 1736 | 628  | 31 | 33    | 4.52 | 49.18 |
| chr4 | 119140246 | 119141045 | 800  | 224  | 18 | 32.44 | 4.93 | 49.55 |
| chr4 | 119512260 | 119513040 | 781  | 517  | 21 | 37.29 | 4.45 | 46.72 |
| chr4 | 119796361 | 119798009 | 1649 | 550  | 51 | 43.64 | 4.57 | 47.74 |
| chr4 | 120092405 | 120093376 | 972  | 393  | 21 | 31.22 | 5.33 | 50.58 |
| chr4 | 120599027 | 120599926 | 900  | 335  | 20 | 35.16 | 4.52 | 47.05 |
| chr4 | 120661759 | 120662857 | 1099 | 536  | 27 | 49.35 | 4.93 | 51.31 |
| chr4 | 120965052 | 120965953 | 902  | 575  | 21 | 34.58 | 4.52 | 47.7  |
| chr4 | 121085186 | 121086056 | 871  | 362  | 19 | 32.59 | 4.52 | 49.42 |
| chr4 | 121103993 | 121105786 | 1794 | 355  | 39 | 55.51 | 5.75 | 54.13 |
| chr4 | 121156390 | 121157197 | 808  | 230  | 20 | 40.97 | 4.93 | 46.22 |
| chr4 | 121320765 | 121322159 | 1395 | 727  | 32 | 53.07 | 5.75 | 51.41 |
| chr4 | 122146200 | 122148583 | 2384 | 1694 | 52 | 33.47 | 3.84 | 48.6  |
| chr4 | 122274793 | 122278054 | 3262 | 610  | 83 | 67.94 | 3.96 | 54.35 |
| chr4 | 122427860 | 122429159 | 1300 | 611  | 29 | 34.76 | 4.54 | 47.6  |
| chr4 | 122473539 | 122474761 | 1223 | 590  | 28 | 40.07 | 6.02 | 46.55 |
| chr4 | 122891725 | 122893314 | 1590 | 471  | 32 | 45.7  | 3.4  | 49.7  |
| chr4 | 123014620 | 123015629 | 1010 | 739  | 21 | 33.21 | 5.75 | 49.14 |
| chr4 | 123177255 | 123178905 | 1651 | 655  | 32 | 34.6  | 3.28 | 47.72 |
| chr4 | 123288504 | 123289395 | 892  | 262  | 19 | 31.43 | 6.98 | 50    |
| chr4 | 123516963 | 123517867 | 905  | 281  | 21 | 39.22 | 4.93 | 46.37 |
| chr4 | 123566482 | 123567242 | 761  | 306  | 17 | 30.42 | 5.34 | 51.28 |
| chr4 | 123900691 | 123901775 | 1085 | 549  | 23 | 33.29 | 4.93 | 48.83 |
| chr4 | 124062776 | 124064150 | 1375 | 933  | 33 | 48.06 | 5.71 | 49.18 |
| chr4 | 124177693 | 124178587 | 895  | 215  | 20 | 35.45 | 4.52 | 47.41 |
| chr4 | 124438460 | 124440199 | 1740 | 1468 | 31 | 36.12 | 4.52 | 47.01 |
| chr4 | 124451875 | 124452511 | 637  | 358  | 17 | 38.66 | 5.75 | 46.06 |
| chr4 | 124683620 | 124684839 | 1220 | 733  | 27 | 42.14 | 5.34 | 46.95 |
| chr4 | 124816597 | 124817430 | 834  | 368  | 18 | 30.49 | 4.93 | 51.26 |
| chr4 | 124872785 | 124873942 | 1158 | 492  | 24 | 33.51 | 6.98 | 48.65 |
| chr4 | 125021336 | 125023140 | 1805 | 591  | 35 | 40.19 | 5.34 | 46.65 |
| chr4 | 125106350 | 125107353 | 1004 | 640  | 24 | 41.94 | 5.34 | 47.01 |
| chr4 | 125324011 | 125325397 | 1387 | 526  | 31 | 46.92 | 5.18 | 47.76 |
| chr4 | 125604342 | 125605874 | 1533 | 966  | 33 | 45.52 | 5.34 | 49.96 |
| chr4 | 125777221 | 125777810 | 590  | 285  | 16 | 37.19 | 5.34 | 46.9  |
| chr4 | 126148867 | 126149861 | 995  | 720  | 20 | 30.06 | 4.52 | 51.48 |
| chr4 | 126186437 | 126187492 | 1056 | 663  | 21 | 30.89 | 4.93 | 50.76 |
| chr4 | 126209569 | 126210739 | 1171 | 455  | 29 | 34.04 | 4.67 | 48.52 |
| chr4 | 126252363 | 126254058 | 1696 | 286  | 34 | 37.05 | 6.2  | 47.05 |
| chr4 | 126341672 | 126343959 | 2288 | 612  | 50 | 30.5  | 4.25 | 51.28 |

|      |           |           |      |      |     |       |      |       |
|------|-----------|-----------|------|------|-----|-------|------|-------|
| chr4 | 126378744 | 126380989 | 2246 | 628  | 53  | 40.64 | 4    | 46.64 |
| chr4 | 126496659 | 126498088 | 1430 | 627  | 34  | 39.85 | 4.07 | 46.64 |
| chr4 | 126525246 | 126526820 | 1575 | 285  | 41  | 57.43 | 4.41 | 53.91 |
| chr4 | 126723336 | 126725105 | 1770 | 1309 | 36  | 31.36 | 4.11 | 50.23 |
| chr4 | 126737803 | 126739059 | 1257 | 628  | 27  | 30.69 | 5.3  | 51    |
| chr4 | 126750884 | 126753245 | 2362 | 893  | 57  | 58.97 | 4.89 | 52.63 |
| chr4 | 127024980 | 127025930 | 951  | 251  | 20  | 32.32 | 4.11 | 50.02 |
| chr4 | 127243085 | 127244074 | 990  | 747  | 21  | 34.28 | 4.93 | 47.79 |
| chr4 | 127650464 | 127651682 | 1219 | 600  | 25  | 34.33 | 5.75 | 47.83 |
| chr4 | 128056393 | 128057534 | 1142 | 678  | 24  | 30.05 | 5.33 | 51.45 |
| chr4 | 128476087 | 128477206 | 1120 | 318  | 28  | 52.54 | 5.34 | 50.16 |
| chr4 | 128569332 | 128570772 | 1441 | 593  | 32  | 41.9  | 4.79 | 47.01 |
| chr4 | 129094482 | 129097438 | 2957 | 1064 | 85  | 43.12 | 3.78 | 47.34 |
| chr4 | 129331947 | 129334107 | 2161 | 1872 | 50  | 32.63 | 3.56 | 49.43 |
| chr4 | 129602092 | 129604674 | 2583 | 396  | 57  | 39.45 | 4    | 47.12 |
| chr4 | 129958647 | 129963244 | 4598 | 970  | 118 | 38.03 | 3.81 | 46.41 |
| chr4 | 130040818 | 130042638 | 1821 | 603  | 41  | 36.51 | 4.05 | 47    |
| chr4 | 130192449 | 130194451 | 2003 | 1622 | 50  | 35.92 | 3.95 | 47.1  |
| chr4 | 130297577 | 130299437 | 1861 | 1134 | 48  | 51.78 | 4.59 | 51.02 |
| chr4 | 130329687 | 130331403 | 1717 | 901  | 48  | 63.47 | 5.34 | 55.29 |
| chr4 | 130492496 | 130494074 | 1579 | 1114 | 35  | 31.05 | 3.81 | 50.59 |
| chr4 | 130526021 | 130528377 | 2357 | 1012 | 55  | 58.38 | 4.45 | 53.76 |
| chr4 | 130587085 | 130588458 | 1374 | 460  | 31  | 31.96 | 4.16 | 49.79 |
| chr4 | 130761076 | 130763085 | 2010 | 739  | 54  | 43.01 | 5.49 | 47.51 |
| chr4 | 131596552 | 131597644 | 1093 | 713  | 24  | 31.25 | 4.09 | 50.5  |
| chr4 | 131687383 | 131688631 | 1249 | 560  | 30  | 42.59 | 4.64 | 47.26 |
| chr4 | 131695350 | 131696496 | 1147 | 545  | 27  | 36.95 | 4.99 | 46.97 |
| chr4 | 131962215 | 131962989 | 775  | 487  | 22  | 30.71 | 4.81 | 51    |
| chr4 | 131990425 | 131991705 | 1281 | 680  | 31  | 39.41 | 5.98 | 47.07 |
| chr4 | 132187915 | 132190479 | 2565 | 640  | 59  | 67.49 | 4.89 | 54.17 |
| chr4 | 132224733 | 132226777 | 2045 | 1446 | 47  | 43.71 | 4.48 | 47.87 |
| chr4 | 132238749 | 132241090 | 2342 | 283  | 59  | 50.32 | 4    | 51.72 |
| chr4 | 132370680 | 132371873 | 1194 | 631  | 29  | 31.1  | 4.55 | 50.63 |
| chr4 | 132387290 | 132388881 | 1592 | 993  | 38  | 38.23 | 3.74 | 46.34 |
| chr4 | 132403439 | 132406024 | 2586 | 1868 | 66  | 55.87 | 4.57 | 53.38 |
| chr4 | 132526045 | 132528998 | 2954 | 2419 | 67  | 57.67 | 4.85 | 54.01 |
| chr4 | 132721239 | 132722401 | 1163 | 434  | 28  | 31.12 | 4.05 | 50.71 |
| chr4 | 132744069 | 132745204 | 1136 | 482  | 31  | 37.1  | 4.57 | 46.96 |
| chr4 | 132867447 | 132868920 | 1474 | 864  | 35  | 33.97 | 4.01 | 48.61 |
| chr4 | 133045096 | 133046760 | 1665 | 1214 | 37  | 39.81 | 4.15 | 46.64 |
| chr4 | 133456858 | 133457689 | 832  | 286  | 18  | 30.6  | 4.52 | 51.25 |
| chr4 | 133534891 | 133536602 | 1712 | 429  | 35  | 38.39 | 4.57 | 46.35 |
| chr4 | 133635807 | 133636632 | 826  | 545  | 19  | 31.45 | 4.95 | 50.04 |
| chr4 | 133724396 | 133726438 | 2043 | 564  | 41  | 50.83 | 5.34 | 51.81 |
| chr4 | 133736889 | 133737569 | 681  | 379  | 19  | 45.46 | 6.57 | 49.78 |
| chr4 | 133841262 | 133842681 | 1420 | 704  | 30  | 43.51 | 6.57 | 48.09 |
| chr4 | 134080654 | 134081721 | 1068 | 487  | 23  | 34.16 | 5.75 | 48.02 |
| chr4 | 134167616 | 134168826 | 1211 | 631  | 26  | 38.59 | 6.16 | 46.1  |
| chr4 | 134180883 | 134182372 | 1490 | 1268 | 30  | 40.05 | 4.11 | 46.59 |
| chr4 | 134468618 | 134469594 | 977  | 384  | 23  | 39.21 | 5.75 | 46.37 |
| chr4 | 134572744 | 134573891 | 1148 | 904  | 33  | 63.12 | 5.71 | 53.46 |
| chr4 | 134574027 | 134575053 | 1027 | 263  | 22  | 32.33 | 4.52 | 49.98 |

|      |           |           |      |      |    |       |      |       |
|------|-----------|-----------|------|------|----|-------|------|-------|
| chr4 | 134860233 | 134861710 | 1478 | 698  | 33 | 34.81 | 4.79 | 47.54 |
| chr4 | 134918670 | 134919869 | 1200 | 363  | 30 | 56.43 | 6.98 | 53.68 |
| chr4 | 134967189 | 134968141 | 953  | 415  | 20 | 32.21 | 5.75 | 49.97 |
| chr4 | 135186099 | 135187214 | 1116 | 570  | 26 | 43.88 | 5.75 | 48    |
| chr4 | 135671003 | 135671930 | 928  | 617  | 28 | 40.03 | 4.85 | 46.58 |
| chr4 | 135783402 | 135784300 | 899  | 287  | 19 | 31.05 | 4.93 | 50.69 |
| chr4 | 136032719 | 136033628 | 910  | 374  | 20 | 34.58 | 4.93 | 47.72 |
| chr4 | 136095184 | 136096040 | 857  | 257  | 19 | 33.39 | 4.52 | 48.72 |
| chr4 | 136281455 | 136282599 | 1145 | 391  | 25 | 38.09 | 5.34 | 46.46 |
| chr4 | 136367556 | 136368273 | 718  | 470  | 17 | 32.7  | 4.48 | 49.44 |
| chr4 | 136434845 | 136436492 | 1648 | 1341 | 38 | 37.68 | 4.16 | 46.38 |
| chr4 | 137028439 | 137029641 | 1203 | 411  | 25 | 35.11 | 4.93 | 47.43 |
| chr4 | 138152473 | 138153593 | 1121 | 614  | 24 | 35.37 | 5.75 | 47.53 |
| chr4 | 138555263 | 138555866 | 604  | 267  | 16 | 36.13 | 6.16 | 46.98 |
| chr4 | 138741064 | 138741885 | 822  | 554  | 19 | 35.48 | 4.52 | 47.39 |
| chr4 | 138804775 | 138806269 | 1495 | 682  | 34 | 45.32 | 6.47 | 49.32 |
| chr4 | 139282126 | 139283460 | 1335 | 600  | 29 | 44.01 | 7.39 | 48.03 |
| chr4 | 139350341 | 139351458 | 1118 | 674  | 25 | 39.55 | 6.16 | 46.77 |
| chr4 | 139435013 | 139436186 | 1174 | 785  | 30 | 47.95 | 5.05 | 49.42 |
| chr4 | 139911448 | 139912235 | 788  | 374  | 18 | 33.15 | 5.34 | 49.12 |
| chr4 | 140122141 | 140123374 | 1234 | 533  | 32 | 48.28 | 5.14 | 49.31 |
| chr4 | 140620642 | 140621813 | 1172 | 747  | 27 | 44.86 | 5.75 | 48.94 |
| chr4 | 140671121 | 140671941 | 821  | 270  | 18 | 31.22 | 4.93 | 50.51 |
| chr4 | 140792223 | 140793762 | 1540 | 486  | 34 | 32.46 | 3.96 | 49.45 |
| chr4 | 141195610 | 141197520 | 1911 | 1415 | 41 | 57.27 | 5.34 | 53.33 |
| chr4 | 141632958 | 141633811 | 854  | 351  | 23 | 31.25 | 4.67 | 50.51 |
| chr4 | 141778122 | 141779070 | 949  | 482  | 20 | 32.43 | 6.16 | 49.57 |
| chr4 | 142335165 | 142336089 | 925  | 655  | 20 | 33.74 | 5.34 | 48.66 |
| chr4 | 142630204 | 142630931 | 728  | 281  | 17 | 32.41 | 4.93 | 49.69 |
| chr4 | 143272049 | 143273471 | 1423 | 240  | 31 | 38.44 | 4.37 | 46.34 |
| chr4 | 144432882 | 144435718 | 2837 | 2200 | 80 | 32.73 | 3.02 | 49.34 |
| chr4 | 144479223 | 144481399 | 2177 | 448  | 59 | 36.86 | 4.46 | 46.82 |
| chr4 | 144587655 | 144589339 | 1685 | 757  | 42 | 42.41 | 4.47 | 47.14 |
| chr4 | 144675440 | 144677447 | 2008 | 700  | 44 | 52.33 | 4.19 | 50.84 |
| chr4 | 144968117 | 144969148 | 1032 | 624  | 28 | 33.13 | 4.28 | 49.17 |
| chr4 | 145012152 | 145013912 | 1761 | 416  | 41 | 50.57 | 5.3  | 51.44 |
| chr4 | 145135415 | 145137607 | 2193 | 709  | 50 | 43.21 | 5.29 | 47.62 |
| chr4 | 145328423 | 145330264 | 1842 | 388  | 36 | 33.53 | 5.43 | 48.67 |
| chr4 | 145550960 | 145552252 | 1293 | 467  | 29 | 30.13 | 4.2  | 51.63 |
| chr4 | 145618574 | 145620421 | 1848 | 1053 | 52 | 53.13 | 4.08 | 51.59 |
| chr4 | 145751122 | 145752604 | 1483 | 659  | 39 | 47.58 | 5.29 | 49.03 |
| chr4 | 145895035 | 145897596 | 2562 | 1403 | 58 | 36.94 | 3.11 | 46.87 |
| chr4 | 146079424 | 146082944 | 3521 | 738  | 90 | 36.31 | 3.57 | 47    |
| chr4 | 146252139 | 146253189 | 1051 | 463  | 21 | 31.13 | 5.75 | 50.63 |
| chr4 | 146635542 | 146636448 | 907  | 548  | 20 | 33.15 | 4.78 | 49.19 |
| chr4 | 146830436 | 146833431 | 2996 | 2198 | 79 | 31.36 | 3.63 | 50.21 |
| chr4 | 147125943 | 147127514 | 1572 | 1044 | 37 | 31.49 | 3.81 | 49.9  |
| chr4 | 147175400 | 147177084 | 1685 | 1429 | 48 | 46.72 | 3.69 | 47.56 |
| chr4 | 147200341 | 147202380 | 2040 | 1229 | 49 | 55.38 | 5.37 | 53.53 |
| chr4 | 147380727 | 147381990 | 1264 | 740  | 30 | 35.49 | 3.59 | 47.36 |
| chr4 | 147428646 | 147430136 | 1491 | 924  | 37 | 38.08 | 4.85 | 46.45 |
| chr4 | 147508072 | 147509416 | 1345 | 846  | 29 | 31.29 | 5.14 | 50.33 |

|      |           |           |      |      |     |       |      |       |
|------|-----------|-----------|------|------|-----|-------|------|-------|
| chr4 | 147512923 | 147514179 | 1257 | 779  | 25  | 32.12 | 4.48 | 49.78 |
| chr4 | 147554950 | 147556028 | 1079 | 645  | 25  | 37.05 | 5.33 | 47.04 |
| chr4 | 147560276 | 147561378 | 1103 | 585  | 24  | 30.75 | 5.58 | 50.96 |
| chr4 | 147754731 | 147756897 | 2167 | 1376 | 50  | 48.05 | 4.52 | 49.13 |
| chr4 | 147792320 | 147793403 | 1084 | 281  | 30  | 33.06 | 4.85 | 49.17 |
| chr4 | 147823661 | 147825105 | 1445 | 611  | 33  | 44.18 | 4.57 | 48.03 |
| chr4 | 147825110 | 147827676 | 2567 | 661  | 55  | 47.55 | 4.41 | 48.95 |
| chr4 | 147883650 | 147885021 | 1372 | 798  | 29  | 36.09 | 4.89 | 46.96 |
| chr4 | 148115081 | 148116095 | 1015 | 595  | 26  | 38.9  | 4.84 | 46.24 |
| chr4 | 148289432 | 148290772 | 1341 | 760  | 32  | 41.86 | 4.11 | 47.17 |
| chr4 | 148337615 | 148339295 | 1681 | 1098 | 35  | 30.01 | 4.32 | 51.47 |
| chr4 | 148549131 | 148551761 | 2631 | 913  | 87  | 56.33 | 3.63 | 53.88 |
| chr4 | 148767431 | 148768802 | 1372 | 731  | 32  | 48.23 | 5.71 | 49.56 |
| chr4 | 149058205 | 149059157 | 953  | 336  | 20  | 32.21 | 6.57 | 49.97 |
| chr4 | 149162512 | 149163458 | 947  | 348  | 22  | 30.32 | 4.74 | 51.58 |
| chr4 | 149232982 | 149234184 | 1203 | 405  | 30  | 56.23 | 6.98 | 53.97 |
| chr4 | 149547366 | 149549445 | 2080 | 1451 | 52  | 62.7  | 5.98 | 54.91 |
| chr4 | 149585420 | 149586340 | 921  | 497  | 21  | 38.23 | 5.75 | 46.31 |
| chr4 | 149711845 | 149713127 | 1283 | 769  | 28  | 30.95 | 4.79 | 50.56 |
| chr4 | 149798902 | 149800890 | 1989 | 492  | 49  | 79.64 | 6.56 | 59.26 |
| chr4 | 150253214 | 150254695 | 1482 | 544  | 33  | 31.94 | 3.62 | 49.74 |
| chr4 | 150267114 | 150268231 | 1118 | 497  | 24  | 35.52 | 5.75 | 47.23 |
| chr4 | 150327683 | 150330089 | 2407 | 1004 | 45  | 32.36 | 4.11 | 49.83 |
| chr4 | 150448245 | 150449490 | 1246 | 817  | 27  | 30.6  | 4.54 | 51.22 |
| chr4 | 150493397 | 150495563 | 2167 | 1176 | 62  | 59.21 | 4.74 | 53.7  |
| chr4 | 150694841 | 150695996 | 1156 | 627  | 27  | 32.11 | 4.99 | 49.72 |
| chr4 | 150814205 | 150816494 | 2290 | 1677 | 48  | 36.95 | 3.55 | 46.91 |
| chr4 | 150919842 | 150921350 | 1509 | 799  | 41  | 32.24 | 4.4  | 50.04 |
| chr4 | 150930313 | 150932846 | 2534 | 1729 | 65  | 30.17 | 3.65 | 51.65 |
| chr4 | 151226828 | 151228519 | 1692 | 988  | 49  | 30.02 | 4.07 | 51.5  |
| chr4 | 151345213 | 151347552 | 2340 | 1617 | 66  | 44.53 | 3.77 | 48.7  |
| chr4 | 151426667 | 151427999 | 1333 | 711  | 38  | 43.62 | 4.73 | 47.61 |
| chr4 | 151449485 | 151450815 | 1331 | 736  | 30  | 30.88 | 4.48 | 50.81 |
| chr4 | 151561831 | 151564161 | 2331 | 1215 | 64  | 54.01 | 3.89 | 52.66 |
| chr4 | 151953057 | 151955304 | 2248 | 1710 | 51  | 33.58 | 3.72 | 48.73 |
| chr4 | 152081700 | 152082915 | 1216 | 436  | 31  | 38.44 | 3.74 | 46.36 |
| chr4 | 152288458 | 152289866 | 1409 | 923  | 32  | 39.68 | 4.54 | 46.51 |
| chr4 | 152436136 | 152437302 | 1167 | 514  | 28  | 49.51 | 4.93 | 51.4  |
| chr4 | 152500628 | 152501568 | 941  | 604  | 22  | 31.2  | 4.42 | 50.53 |
| chr4 | 152633955 | 152635427 | 1473 | 1196 | 32  | 40.27 | 4.42 | 46.85 |
| chr4 | 152823428 | 152824775 | 1348 | 882  | 30  | 33.14 | 4.03 | 49.14 |
| chr4 | 153000906 | 153001651 | 746  | 489  | 22  | 39.86 | 4.45 | 46.61 |
| chr4 | 153054733 | 153055611 | 879  | 597  | 21  | 30.97 | 4.45 | 50.44 |
| chr4 | 153333449 | 153334933 | 1485 | 722  | 39  | 50.79 | 4.85 | 51.87 |
| chr4 | 153419528 | 153425957 | 6430 | 5796 | 156 | 30.9  | 4.84 | 50.68 |
| chr4 | 153589651 | 153590863 | 1213 | 496  | 28  | 42.14 | 4.23 | 46.97 |
| chr4 | 153803851 | 153805416 | 1566 | 833  | 41  | 35.19 | 4.48 | 47.12 |
| chr4 | 154040927 | 154042793 | 1867 | 1087 | 40  | 30.34 | 4.59 | 51.65 |
| chr4 | 154264984 | 154268077 | 3094 | 555  | 87  | 33.89 | 3.83 | 48.62 |
| chr4 | 154274854 | 154277471 | 2618 | 855  | 75  | 41.17 | 4.07 | 46.46 |
| chr4 | 154369042 | 154370568 | 1527 | 286  | 41  | 44.14 | 5.14 | 48.04 |
| chr4 | 154461753 | 154463576 | 1824 | 633  | 39  | 30.05 | 3.7  | 51.46 |

|      |           |           |      |      |     |       |      |       |
|------|-----------|-----------|------|------|-----|-------|------|-------|
| chr4 | 154611620 | 154612760 | 1141 | 340  | 26  | 31.18 | 4.45 | 50.55 |
| chr4 | 154739432 | 154741603 | 2172 | 1392 | 46  | 36.14 | 4.85 | 46.99 |
| chr4 | 154749342 | 154750368 | 1027 | 494  | 26  | 36.91 | 5.43 | 46.78 |
| chr4 | 154840922 | 154842973 | 2052 | 1651 | 54  | 96.07 | 7.39 | 32    |
| chr4 | 154882833 | 154884148 | 1316 | 731  | 32  | 40.33 | 4.94 | 46.87 |
| chr4 | 154901691 | 154903926 | 2236 | 941  | 55  | 61.3  | 4.33 | 54.94 |
| chr4 | 154964396 | 154965586 | 1191 | 555  | 28  | 33.72 | 4.65 | 48.62 |
| chr4 | 155171580 | 155173318 | 1739 | 635  | 40  | 41.99 | 4.28 | 47.15 |
| chr4 | 155328285 | 155330457 | 2173 | 720  | 49  | 33.22 | 5.42 | 49.17 |
| chr4 | 155357546 | 155359004 | 1459 | 609  | 36  | 32.13 | 3.71 | 49.82 |
| chr4 | 155378692 | 155379714 | 1023 | 525  | 26  | 37.77 | 4.45 | 46.66 |
| chr4 | 155384655 | 155386341 | 1687 | 530  | 35  | 34.83 | 3.77 | 47.55 |
| chr4 | 155530534 | 155531486 | 953  | 272  | 30  | 39.71 | 4.44 | 46.61 |
| chr4 | 155631913 | 155633219 | 1307 | 635  | 32  | 35.48 | 5.2  | 47.4  |
| chr4 | 155727465 | 155730646 | 3182 | 1483 | 71  | 33.87 | 2.9  | 48.63 |
| chr4 | 156007638 | 156008909 | 1272 | 786  | 33  | 34.33 | 4.68 | 47.8  |
| chr4 | 156264644 | 156267752 | 3109 | 1384 | 79  | 66.45 | 4.89 | 54.43 |
| chr4 | 156370178 | 156372391 | 2214 | 509  | 53  | 32.19 | 3.35 | 49.98 |
| chr4 | 156576862 | 156580942 | 4081 | 1241 | 110 | 34.92 | 3.83 | 47.59 |
| chr4 | 156834465 | 156836095 | 1631 | 1031 | 45  | 40.54 | 4.48 | 46.91 |
| chr4 | 156925209 | 156927472 | 2264 | 509  | 56  | 30.13 | 3.42 | 51.66 |
| chr4 | 156985476 | 156986780 | 1305 | 1051 | 38  | 61.57 | 4.99 | 53.23 |
| chr4 | 157258058 | 157259807 | 1750 | 1460 | 40  | 30.64 | 3.17 | 51.19 |
| chr4 | 157276150 | 157278210 | 2061 | 280  | 52  | 47.5  | 4.89 | 48.68 |
| chr4 | 157315156 | 157317920 | 2765 | 2209 | 65  | 53.06 | 4.58 | 51.24 |
| chr4 | 157339224 | 157340053 | 830  | 262  | 20  | 33.69 | 4.42 | 48.59 |
| chr4 | 157444903 | 157446388 | 1486 | 777  | 38  | 40.91 | 4.51 | 46.43 |
| chr4 | 157451277 | 157452875 | 1599 | 1126 | 40  | 30.78 | 4.48 | 50.97 |
| chr4 | 157532936 | 157534617 | 1682 | 1155 | 38  | 33.27 | 3.7  | 48.96 |
| chr4 | 157704851 | 157706423 | 1573 | 1029 | 33  | 30.58 | 4.45 | 51.2  |
| chr4 | 157826808 | 157828396 | 1589 | 1352 | 33  | 32.94 | 4.11 | 49.38 |
| chr4 | 157903417 | 157904812 | 1396 | 620  | 34  | 44.82 | 5.3  | 48.88 |
| chr4 | 157922164 | 157923616 | 1453 | 858  | 34  | 31.3  | 3.36 | 50.33 |
| chr4 | 158064695 | 158066145 | 1451 | 285  | 30  | 37.35 | 4.23 | 46.84 |
| chr4 | 158352741 | 158354297 | 1557 | 1266 | 35  | 35.42 | 3.99 | 47.53 |
| chr4 | 158371974 | 158373196 | 1223 | 601  | 25  | 34.14 | 5.75 | 47.98 |
| chr4 | 158373427 | 158374489 | 1063 | 679  | 21  | 30.55 | 4.11 | 51.18 |
| chr4 | 158385746 | 158387620 | 1875 | 583  | 36  | 51.42 | 5.75 | 51.56 |
| chr4 | 158514492 | 158516224 | 1733 | 754  | 36  | 34.34 | 3.84 | 47.88 |
| chr4 | 158909189 | 158911757 | 2569 | 1959 | 59  | 34.24 | 3.16 | 47.91 |
| chr4 | 158960606 | 158961617 | 1012 | 378  | 25  | 42.42 | 5.45 | 47.18 |
| chr4 | 158987649 | 158988583 | 935  | 549  | 25  | 33.64 | 4.67 | 48.78 |
| chr4 | 159095977 | 159097071 | 1095 | 509  | 32  | 43.4  | 4.28 | 47.78 |
| chr4 | 159232727 | 159233430 | 704  | 271  | 20  | 37.49 | 6.04 | 46.01 |
| chr4 | 159252578 | 159253618 | 1041 | 612  | 26  | 33.71 | 3.91 | 48.58 |
| chr4 | 159358788 | 159359837 | 1050 | 356  | 25  | 40.81 | 4.72 | 46.33 |
| chr4 | 159391253 | 159392606 | 1354 | 564  | 29  | 30.88 | 4.79 | 50.82 |
| chr4 | 159439750 | 159441902 | 2153 | 808  | 48  | 30.81 | 3.96 | 50.97 |
| chr4 | 159488409 | 159489941 | 1533 | 895  | 39  | 58.05 | 5.05 | 53.02 |
| chr4 | 159537596 | 159539160 | 1565 | 1186 | 38  | 44.24 | 4.61 | 48.32 |
| chr4 | 159588850 | 159591199 | 2350 | 1695 | 65  | 31.87 | 3.23 | 49.78 |
| chr4 | 159597471 | 159599869 | 2399 | 1076 | 57  | 33.2  | 3.14 | 49.11 |

|      |           |           |      |      |    |       |      |       |
|------|-----------|-----------|------|------|----|-------|------|-------|
| chr4 | 159696363 | 159698548 | 2186 | 930  | 49 | 38.92 | 3.36 | 46.27 |
| chr4 | 159865149 | 159865882 | 734  | 378  | 19 | 30.64 | 4.32 | 51.17 |
| chr4 | 159952324 | 159953957 | 1634 | 363  | 40 | 47.48 | 3.62 | 48.64 |
| chr4 | 160219975 | 160221423 | 1449 | 856  | 36 | 34.47 | 5.27 | 47.77 |
| chr4 | 160263799 | 160264976 | 1178 | 747  | 28 | 33.8  | 5.93 | 48.84 |
| chr4 | 160576704 | 160577923 | 1220 | 676  | 36 | 79.6  | 8.22 | 58.93 |
| chr4 | 160587085 | 160588200 | 1116 | 496  | 27 | 48.26 | 6.16 | 49.31 |
| chr4 | 160603407 | 160604457 | 1051 | 283  | 25 | 34.76 | 5.35 | 47.62 |
| chr4 | 160611730 | 160613328 | 1599 | 697  | 39 | 59.2  | 6.85 | 53.53 |
| chr4 | 160683811 | 160685389 | 1579 | 911  | 41 | 41.2  | 4.57 | 46.6  |
| chr4 | 160945014 | 160945860 | 847  | 289  | 20 | 38.39 | 6.98 | 46.28 |
| chr4 | 161021833 | 161022962 | 1130 | 495  | 26 | 31.75 | 4.45 | 49.78 |
| chr4 | 161101878 | 161102828 | 951  | 365  | 21 | 31.78 | 5.65 | 49.88 |
| chr4 | 161117784 | 161119076 | 1293 | 509  | 28 | 30.48 | 4.45 | 51.25 |
| chr4 | 161132424 | 161133596 | 1173 | 626  | 28 | 32.29 | 4.48 | 50.11 |
| chr4 | 161235107 | 161236378 | 1272 | 827  | 27 | 39.38 | 6.16 | 46.86 |
| chr4 | 161352465 | 161354424 | 1960 | 1289 | 45 | 49.85 | 4.54 | 51.74 |
| chr4 | 161387581 | 161389535 | 1955 | 1255 | 44 | 44.83 | 4.45 | 48.88 |
| chr4 | 161626593 | 161629524 | 2932 | 2657 | 72 | 77.62 | 5.93 | 56.72 |
| chr4 | 161698393 | 161699597 | 1205 | 504  | 32 | 30.85 | 3.16 | 50.92 |
| chr4 | 161874013 | 161875623 | 1611 | 565  | 33 | 31.99 | 4.11 | 49.83 |
| chr4 | 162206342 | 162208108 | 1767 | 463  | 45 | 68.44 | 6.02 | 56.15 |
| chr4 | 162342890 | 162344172 | 1283 | 666  | 28 | 30.95 | 6.16 | 50.56 |
| chr4 | 162382812 | 162384509 | 1698 | 1426 | 41 | 42.45 | 3.74 | 47.35 |
| chr4 | 162403305 | 162404564 | 1260 | 640  | 28 | 38.81 | 5.33 | 46.11 |
| chr4 | 162409926 | 162410800 | 875  | 323  | 20 | 30.48 | 4.01 | 51.27 |
| chr4 | 162484282 | 162486141 | 1860 | 679  | 40 | 36.39 | 3.95 | 47.2  |
| chr4 | 162582049 | 162583556 | 1508 | 900  | 34 | 36.66 | 5.14 | 47.03 |
| chr4 | 162616357 | 162617589 | 1233 | 447  | 30 | 31.97 | 4.52 | 49.83 |
| chr4 | 162688685 | 162690980 | 2296 | 1416 | 53 | 59.24 | 4.15 | 54.07 |
| chr4 | 162770313 | 162771598 | 1286 | 425  | 29 | 42.83 | 4.67 | 47.34 |
| chr4 | 162915030 | 162916315 | 1286 | 599  | 32 | 45.05 | 5.48 | 49.16 |
| chr4 | 163089100 | 163091025 | 1926 | 1325 | 44 | 32.51 | 4.1  | 49.37 |
| chr4 | 163200397 | 163201998 | 1602 | 277  | 37 | 40.51 | 3.69 | 46.96 |
| chr4 | 163242183 | 163243559 | 1377 | 518  | 33 | 46.21 | 4.47 | 48.58 |
| chr4 | 163247668 | 163249412 | 1745 | 1078 | 37 | 44.67 | 4.62 | 48.8  |
| chr4 | 163279853 | 163282132 | 2280 | 1240 | 51 | 42.25 | 4.05 | 47.06 |
| chr4 | 163326340 | 163327572 | 1233 | 703  | 31 | 58.84 | 7.39 | 52.6  |
| chr4 | 163445549 | 163447002 | 1454 | 1233 | 33 | 37.4  | 3.49 | 46.72 |
| chr4 | 163719348 | 163721532 | 2185 | 786  | 52 | 54.51 | 5.86 | 54.24 |
| chr4 | 163849175 | 163852051 | 2877 | 729  | 67 | 78.49 | 5.46 | 59.02 |
| chr4 | 164009122 | 164010929 | 1808 | 1195 | 43 | 34.91 | 4.68 | 47.61 |
| chr4 | 164043637 | 164045006 | 1370 | 780  | 32 | 35.38 | 6.4  | 47.58 |
| chr4 | 164049073 | 164051455 | 2383 | 799  | 55 | 44.44 | 3.98 | 48.52 |
| chr4 | 164241562 | 164242989 | 1428 | 442  | 31 | 31.93 | 3.99 | 49.74 |
| chr4 | 164271974 | 164273715 | 1742 | 255  | 40 | 37.9  | 4.08 | 46.6  |
| chr4 | 164311512 | 164314086 | 2575 | 1916 | 63 | 31.2  | 4.31 | 50.55 |
| chr4 | 164568672 | 164571235 | 2564 | 1357 | 64 | 32.86 | 4.03 | 49.3  |
| chr4 | 164601561 | 164603619 | 2059 | 644  | 55 | 36.63 | 4.65 | 46.97 |
| chr4 | 164720566 | 164721668 | 1103 | 594  | 27 | 34.38 | 4.61 | 47.8  |
| chr4 | 164812908 | 164814146 | 1239 | 658  | 29 | 36.59 | 6.51 | 46.91 |
| chr4 | 164881765 | 164883081 | 1317 | 738  | 32 | 36.21 | 4.36 | 46.97 |



|      |           |           |      |      |      |         |      |       |
|------|-----------|-----------|------|------|------|---------|------|-------|
| chr4 | 165011314 | 165012685 | 1372 | 498  | 33   | 44.01   | 3.97 | 48.09 |
| chr4 | 165044099 | 165046161 | 2063 | 568  | 49   | 30.8    | 3.16 | 51.02 |
| chr4 | 165095344 | 165097615 | 2272 | 1243 | 50   | 31.82   | 3.42 | 49.82 |
| chr4 | 165129376 | 165130606 | 1231 | 782  | 30   | 40.7    | 4.79 | 46.52 |
| chr4 | 165286900 | 165289038 | 2139 | 710  | 51   | 39.16   | 4.25 | 46.23 |
| chr4 | 165471288 | 165472182 | 895  | 606  | 19   | 31.27   | 5.75 | 50.46 |
| chr4 | 165510202 | 165511561 | 1360 | 820  | 37   | 71.79   | 8.06 | 56.57 |
| chr4 | 165513070 | 165514328 | 1259 | 641  | 30   | 52.62   | 6.57 | 50.32 |
| chr4 | 165526791 | 165528385 | 1595 | 911  | 42   | 54.32   | 5.44 | 54.55 |
| chr4 | 165569227 | 165570454 | 1228 | 388  | 27   | 35.33   | 4.47 | 47.49 |
| chr4 | 165697781 | 165699088 | 1308 | 653  | 31   | 30.47   | 4.47 | 51.23 |
| chr4 | 165926665 | 165927892 | 1228 | 617  | 29   | 42.18   | 5.16 | 47.13 |
| chr4 | 166181854 | 166183682 | 1829 | 1011 | 50   | 32.44   | 4.17 | 49.57 |
| chr4 | 166346403 | 166347453 | 1051 | 361  | 23   | 33.34   | 5.18 | 48.72 |
| chr4 | 166399015 | 166400099 | 1085 | 640  | 25   | 31.15   | 4.84 | 50.61 |
| chr4 | 166502852 | 166503903 | 1052 | 541  | 22   | 31.08   | 6.57 | 50.76 |
| chr4 | 166605897 | 166607968 | 2072 | 366  | 50   | 49      | 4.67 | 50.6  |
| chr4 | 166743856 | 166745182 | 1327 | 592  | 26   | 32.99   | 6.57 | 49.21 |
| chr4 | 166833770 | 166834621 | 852  | 269  | 19   | 33.68   | 5.34 | 48.55 |
| chr4 | 166934979 | 166936030 | 1052 | 641  | 23   | 33.29   | 5.18 | 48.87 |
| chr4 | 166943722 | 166944912 | 1191 | 670  | 34   | 49.7    | 5.12 | 51.54 |
| chr4 | 166945647 | 166947064 | 1418 | 951  | 35   | 36.8    | 4.01 | 46.82 |
| chr4 | 166970827 | 166972140 | 1314 | 726  | 29   | 32.76   | 4.79 | 49.39 |
| chr4 | 167200314 | 167201877 | 1564 | 1043 | 38   | 39.65   | 4.67 | 46.46 |
| chr4 | 167218146 | 167219399 | 1254 | 677  | 29   | 43.02   | 5.33 | 47.54 |
| chr4 | 167248882 | 167250163 | 1282 | 679  | 30   | 31.5    | 4.36 | 49.88 |
| chr4 | 167277336 | 167279429 | 2094 | 1516 | 50   | 31.95   | 3.16 | 49.8  |
| chr4 | 167500498 | 167502257 | 1760 | 956  | 272  | 48.59   | 6.2  | 49.79 |
| chr4 | 167599377 | 167600981 | 1605 | 723  | 46   | 64.22   | 6.02 | 54.4  |
| chr4 | 173948208 | 173948860 | 653  | 261  | 16   | 32.67   | 4.93 | 49.42 |
| chr4 | 174088126 | 174089008 | 883  | 257  | 19   | 31.92   | 6.16 | 49.72 |
| chr4 | 181502764 | 181503578 | 815  | 305  | 19   | 35.92   | 4.93 | 47.05 |
| chr4 | 187539149 | 187540871 | 1723 | 1126 | 39   | 55.25   | 5.11 | 53.3  |
| chr4 | 187628839 | 187630809 | 1971 | 826  | 53   | 54.65   | 4.28 | 54.12 |
| chr4 | 189859098 | 189859775 | 678  | 457  | 17   | 35.69   | 4.93 | 47.24 |
| chr4 | 190517489 | 190520564 | 3076 | 624  | 83   | 36.22   | 3.42 | 46.96 |
| chr4 | 190551098 | 190552920 | 1823 | 1064 | 52   | 30.14   | 4.04 | 51.63 |
| chr4 | 190560545 | 190562804 | 2260 | 1623 | 76   | 32.25   | 3.6  | 50.02 |
| chr4 | 190878958 | 190880421 | 1464 | 665  | 44   | 34.62   | 5.25 | 47.8  |
| chr4 | 190893478 | 190894594 | 1117 | 608  | 50   | 55.53   | 4.99 | 53.93 |
| chr4 | 190916900 | 190917887 | 988  | 602  | 25   | 32.59   | 5.49 | 49.43 |
| chr5 | 9832      | 12463     | 2632 | 1456 | 4894 | 1376.04 | 2.9  | 0     |
| chr5 | 302636    | 303519    | 884  | 279  | 21   | 40.55   | 4.52 | 46.93 |
| chr5 | 789531    | 790426    | 896  | 272  | 19   | 31.21   | 6.16 | 50.51 |
| chr5 | 974511    | 975370    | 860  | 291  | 20   | 37.57   | 7.39 | 45.96 |
| chr5 | 1010480   | 1011313   | 834  | 510  | 18   | 30.49   | 5.34 | 51.26 |
| chr5 | 1293811   | 1295477   | 1667 | 1131 | 35   | 46.5    | 5.34 | 47.97 |
| chr5 | 1315222   | 1316438   | 1217 | 645  | 24   | 30.75   | 6.57 | 50.97 |
| chr5 | 2563727   | 2564404   | 678  | 199  | 16   | 31.05   | 4.52 | 50.56 |
| chr5 | 6588812   | 6590167   | 1356 | 900  | 38   | 78.97   | 7.39 | 58.33 |
| chr5 | 7886866   | 7888125   | 1260 | 623  | 25   | 32.42   | 5.34 | 49.61 |
| chr5 | 8106705   | 8107411   | 707  | 415  | 17   | 30.29   | 5.71 | 51.68 |

|      |          |          |      |      |    |       |      |       |
|------|----------|----------|------|------|----|-------|------|-------|
| chr5 | 9032065  | 9032828  | 764  | 251  | 17 | 30.24 | 5.75 | 51.77 |
| chr5 | 9311732  | 9312513  | 782  | 311  | 18 | 33.52 | 6.16 | 48.58 |
| chr5 | 10381417 | 10382939 | 1523 | 1314 | 36 | 35.35 | 3.42 | 47.47 |
| chr5 | 10912476 | 10913076 | 601  | 303  | 15 | 31.47 | 4.93 | 49.96 |
| chr5 | 11351752 | 11352554 | 803  | 521  | 23 | 46.4  | 5.33 | 48.43 |
| chr5 | 11357716 | 11358625 | 910  | 461  | 19 | 30.47 | 4.52 | 51.26 |
| chr5 | 11485798 | 11486721 | 924  | 279  | 24 | 47.16 | 5.34 | 47.49 |
| chr5 | 11725964 | 11726854 | 891  | 344  | 19 | 31.48 | 4.52 | 49.85 |
| chr5 | 12224400 | 12225219 | 820  | 533  | 18 | 31.28 | 4.11 | 50.36 |
| chr5 | 12364798 | 12365518 | 721  | 478  | 17 | 32.85 | 5.34 | 49.39 |
| chr5 | 12689565 | 12690337 | 773  | 257  | 18 | 30.19 | 4.92 | 51.73 |
| chr5 | 13033468 | 13034402 | 935  | 704  | 21 | 37.39 | 4.52 | 46.67 |
| chr5 | 13083990 | 13085091 | 1102 | 814  | 23 | 32.45 | 6.16 | 49.54 |
| chr5 | 13149774 | 13150531 | 758  | 263  | 17 | 30.59 | 4.93 | 51.24 |
| chr5 | 13154414 | 13155376 | 963  | 285  | 20 | 31.69 | 4.93 | 49.8  |
| chr5 | 15703228 | 15704210 | 983  | 589  | 20 | 30.66 | 4.52 | 51.1  |
| chr5 | 16162806 | 16163590 | 785  | 365  | 19 | 37.84 | 6.16 | 46.76 |
| chr5 | 17165186 | 17166079 | 894  | 628  | 23 | 44.5  | 4.93 | 48.63 |
| chr5 | 17953654 | 17954569 | 916  | 682  | 19 | 30.15 | 4.93 | 51.66 |
| chr5 | 18055216 | 18055750 | 535  | 267  | 18 | 54.21 | 7.39 | 53.5  |
| chr5 | 18347013 | 18347849 | 837  | 291  | 18 | 30.33 | 4.11 | 51.59 |
| chr5 | 18757021 | 18757569 | 549  | 274  | 15 | 37.66 | 6.16 | 46.06 |
| chr5 | 19225641 | 19226883 | 1243 | 466  | 31 | 31.02 | 5.14 | 50.51 |
| chr5 | 19334436 | 19335253 | 818  | 499  | 21 | 44.62 | 5.71 | 48.88 |
| chr5 | 19779187 | 19780065 | 879  | 606  | 19 | 32.14 | 5.34 | 49.88 |
| chr5 | 20187289 | 20188224 | 936  | 386  | 21 | 37.33 | 5.75 | 46.7  |
| chr5 | 20498264 | 20499330 | 1067 | 456  | 29 | 47.07 | 6.16 | 47.51 |
| chr5 | 20538791 | 20539732 | 942  | 661  | 20 | 32.8  | 5.34 | 49.45 |
| chr5 | 20583718 | 20585239 | 1522 | 1124 | 31 | 41.7  | 5.3  | 47.22 |
| chr5 | 20929000 | 20930319 | 1320 | 559  | 31 | 47.23 | 4.57 | 47.99 |
| chr5 | 20972188 | 20972985 | 798  | 540  | 19 | 37    | 4.52 | 46.97 |
| chr5 | 21368526 | 21369796 | 1271 | 760  | 26 | 35.59 | 5.75 | 47.16 |
| chr5 | 21453711 | 21454608 | 898  | 623  | 21 | 39.65 | 4.52 | 46.42 |
| chr5 | 21613062 | 21614155 | 1094 | 536  | 25 | 40.91 | 5.34 | 46.35 |
| chr5 | 21642818 | 21643719 | 902  | 434  | 21 | 39.4  | 5.34 | 46.96 |
| chr5 | 21751599 | 21752481 | 883  | 495  | 19 | 31.92 | 4.93 | 49.72 |
| chr5 | 22055366 | 22056389 | 1024 | 546  | 21 | 32.49 | 4.93 | 49.45 |
| chr5 | 22172637 | 22174059 | 1423 | 803  | 27 | 32.32 | 5.75 | 50.01 |
| chr5 | 22310980 | 22311799 | 820  | 457  | 19 | 31.8  | 5.33 | 49.83 |
| chr5 | 22689513 | 22690273 | 761  | 290  | 17 | 30.42 | 4.93 | 51.28 |
| chr5 | 22745004 | 22746545 | 1542 | 732  | 38 | 48.91 | 6.51 | 50.32 |
| chr5 | 22829915 | 22830785 | 871  | 587  | 19 | 32.59 | 4.93 | 49.42 |
| chr5 | 23065521 | 23066394 | 874  | 282  | 23 | 30.03 | 5.92 | 51.48 |
| chr5 | 23130263 | 23132205 | 1943 | 605  | 41 | 55.65 | 4.93 | 53.86 |
| chr5 | 23535667 | 23537061 | 1395 | 738  | 27 | 33.53 | 6.16 | 48.67 |
| chr5 | 23590250 | 23591023 | 774  | 510  | 18 | 30.41 | 4.95 | 51.4  |
| chr5 | 23618623 | 23619438 | 816  | 477  | 19 | 35.85 | 5.75 | 46.94 |
| chr5 | 24732558 | 24733868 | 1311 | 802  | 30 | 49.49 | 4.93 | 51.57 |
| chr5 | 25181972 | 25182964 | 993  | 291  | 21 | 33.09 | 4.83 | 49.14 |
| chr5 | 25352342 | 25354304 | 1963 | 1354 | 37 | 40.38 | 5.34 | 46.8  |
| chr5 | 25954557 | 25955797 | 1241 | 574  | 30 | 43.82 | 7.21 | 47.96 |
| chr5 | 26166545 | 26167461 | 917  | 281  | 19 | 30.1  | 4.11 | 51.55 |

|      |          |          |      |      |    |       |      |       |
|------|----------|----------|------|------|----|-------|------|-------|
| chr5 | 26175622 | 26176387 | 766  | 273  | 19 | 39.12 | 5.34 | 46.31 |
| chr5 | 26412391 | 26413961 | 1571 | 631  | 36 | 33.07 | 4.05 | 49.2  |
| chr5 | 26592307 | 26593020 | 714  | 455  | 18 | 37.97 | 5.34 | 46.38 |
| chr5 | 27871274 | 27871961 | 688  | 424  | 16 | 30.42 | 5.34 | 51.34 |
| chr5 | 28362911 | 28363653 | 743  | 264  | 17 | 31.49 | 5.75 | 49.89 |
| chr5 | 28414944 | 28416012 | 1069 | 624  | 24 | 38.15 | 5.34 | 46.25 |
| chr5 | 29131944 | 29132614 | 671  | 285  | 17 | 36.18 | 4.52 | 46.87 |
| chr5 | 29349842 | 29350966 | 1125 | 845  | 24 | 35.16 | 5.34 | 47.08 |
| chr5 | 29668597 | 29669397 | 801  | 289  | 22 | 45.86 | 6.12 | 50.15 |
| chr5 | 30064671 | 30065675 | 1005 | 284  | 22 | 33.48 | 4.93 | 48.6  |
| chr5 | 30492464 | 30493663 | 1200 | 563  | 25 | 30.84 | 5.33 | 50.9  |
| chr5 | 30568005 | 30569151 | 1147 | 506  | 26 | 42.08 | 7.39 | 47    |
| chr5 | 30719243 | 30720618 | 1376 | 583  | 30 | 45.83 | 6.16 | 50    |
| chr5 | 30791611 | 30792854 | 1244 | 672  | 26 | 32.29 | 4.19 | 50.08 |
| chr5 | 30900762 | 30901652 | 891  | 664  | 20 | 35.69 | 4.52 | 47.24 |
| chr5 | 32118410 | 32120053 | 1644 | 1065 | 34 | 37.24 | 4.52 | 46.73 |
| chr5 | 32150310 | 32151402 | 1093 | 642  | 28 | 35    | 3.74 | 47.62 |
| chr5 | 32225904 | 32226791 | 888  | 601  | 23 | 44.92 | 5.75 | 48.8  |
| chr5 | 32255877 | 32257210 | 1334 | 564  | 30 | 41.7  | 5.65 | 47.19 |
| chr5 | 32274642 | 32275768 | 1127 | 684  | 28 | 39.22 | 6.16 | 46.43 |
| chr5 | 33151444 | 33152434 | 991  | 264  | 22 | 32.58 | 4.38 | 49.32 |
| chr5 | 33372563 | 33373493 | 931  | 455  | 22 | 33.48 | 5.71 | 48.65 |
| chr5 | 33453035 | 33453996 | 962  | 290  | 23 | 40.12 | 4.93 | 46.66 |
| chr5 | 33819591 | 33820659 | 1069 | 472  | 22 | 30.26 | 5.75 | 51.61 |
| chr5 | 34235553 | 34236445 | 893  | 373  | 21 | 31.73 | 4.94 | 49.76 |
| chr5 | 34363938 | 34365336 | 1399 | 760  | 28 | 36.95 | 6.98 | 46.95 |
| chr5 | 35047065 | 35047904 | 840  | 415  | 22 | 43.5  | 6.57 | 48.04 |
| chr5 | 35241567 | 35242467 | 901  | 645  | 20 | 35.1  | 4.93 | 47.35 |
| chr5 | 35479534 | 35480599 | 1066 | 439  | 22 | 30.4  | 5.34 | 51.46 |
| chr5 | 35705819 | 35707038 | 1220 | 517  | 28 | 46.31 | 6.16 | 48.52 |
| chr5 | 36537919 | 36538644 | 726  | 274  | 17 | 32.53 | 4.52 | 49.39 |
| chr5 | 36550271 | 36551354 | 1084 | 500  | 24 | 37.32 | 6.16 | 46.68 |
| chr5 | 36944908 | 36946372 | 1465 | 942  | 37 | 39.47 | 5.76 | 47.08 |
| chr5 | 37004314 | 37005860 | 1547 | 1287 | 31 | 34.87 | 4.52 | 47.59 |
| chr5 | 37076667 | 37077546 | 880  | 331  | 22 | 40.38 | 5.3  | 46.82 |
| chr5 | 37185030 | 37185743 | 714  | 224  | 18 | 34.21 | 4.95 | 47.93 |
| chr5 | 37675840 | 37676881 | 1042 | 440  | 24 | 38.52 | 4.83 | 46.23 |
| chr5 | 38479053 | 38480227 | 1175 | 492  | 24 | 30.98 | 7.57 | 50.45 |
| chr5 | 38502536 | 38503541 | 1006 | 365  | 21 | 33.42 | 4.93 | 48.69 |
| chr5 | 38717408 | 38718230 | 823  | 337  | 18 | 31.11 | 5.75 | 50.68 |
| chr5 | 39031817 | 39032853 | 1037 | 459  | 26 | 31.2  | 5.6  | 50.52 |
| chr5 | 39104215 | 39104973 | 759  | 291  | 17 | 30.54 | 4.93 | 51.22 |
| chr5 | 39295381 | 39297379 | 1999 | 1405 | 35 | 30.99 | 4.11 | 50.48 |
| chr5 | 39963401 | 39964261 | 861  | 209  | 20 | 37.11 | 4.48 | 46.97 |
| chr5 | 40015030 | 40016492 | 1463 | 486  | 32 | 49.21 | 4.93 | 50.84 |
| chr5 | 40394029 | 40394784 | 756  | 271  | 20 | 44.7  | 4.93 | 48.8  |
| chr5 | 40554066 | 40554904 | 839  | 616  | 18 | 30.22 | 6.16 | 51.69 |
| chr5 | 41065709 | 41067057 | 1349 | 714  | 27 | 35.61 | 6.98 | 47.3  |
| chr5 | 41499826 | 41500768 | 943  | 503  | 20 | 32.75 | 5.75 | 49.37 |
| chr5 | 42070233 | 42071178 | 946  | 626  | 22 | 36.75 | 5.34 | 46.92 |
| chr5 | 42261837 | 42262674 | 838  | 254  | 19 | 34.51 | 4.52 | 47.68 |
| chr5 | 42413559 | 42414651 | 1093 | 557  | 23 | 32.89 | 5.75 | 49.36 |

|      |          |          |      |      |    |       |      |       |
|------|----------|----------|------|------|----|-------|------|-------|
| chr5 | 42527901 | 42528903 | 1003 | 741  | 25 | 46.49 | 6.16 | 48.01 |
| chr5 | 42748076 | 42749190 | 1115 | 529  | 23 | 31.81 | 4.93 | 49.81 |
| chr5 | 42854637 | 42855538 | 902  | 684  | 21 | 35.17 | 4.95 | 47.1  |
| chr5 | 42945382 | 42946663 | 1282 | 695  | 34 | 58.1  | 4.95 | 53.76 |
| chr5 | 42981014 | 42981629 | 616  | 333  | 18 | 45.58 | 6.98 | 50.22 |
| chr5 | 43017266 | 43018838 | 1573 | 991  | 47 | 36.75 | 4.34 | 46.97 |
| chr5 | 43120201 | 43122236 | 2036 | 1228 | 51 | 37.03 | 3.69 | 46.98 |
| chr5 | 43195516 | 43196586 | 1071 | 477  | 23 | 31.08 | 3.89 | 50.76 |
| chr5 | 43196823 | 43198170 | 1348 | 651  | 30 | 34.45 | 6.16 | 47.75 |
| chr5 | 44327835 | 44328662 | 828  | 275  | 20 | 39.62 | 5.34 | 46.59 |
| chr5 | 44458766 | 44459705 | 940  | 665  | 21 | 37.1  | 4.52 | 46.88 |
| chr5 | 44916042 | 44917546 | 1505 | 704  | 34 | 30.14 | 5.29 | 51.63 |
| chr5 | 45328097 | 45329143 | 1047 | 608  | 23 | 31.09 | 6.47 | 50.7  |
| chr5 | 45860330 | 45861612 | 1283 | 590  | 29 | 41.41 | 4.95 | 46.96 |
| chr5 | 49510927 | 49511827 | 901  | 472  | 20 | 30.1  | 5.21 | 51.55 |
| chr5 | 49704188 | 49705866 | 1679 | 928  | 38 | 43.33 | 3.84 | 47.87 |
| chr5 | 50022018 | 50022842 | 825  | 243  | 19 | 35.3  | 4.11 | 47.33 |
| chr5 | 50111238 | 50112631 | 1394 | 870  | 30 | 44.87 | 5.75 | 48.87 |
| chr5 | 50362191 | 50363139 | 949  | 681  | 21 | 36.57 | 4.52 | 46.89 |
| chr5 | 50443184 | 50444564 | 1381 | 622  | 28 | 37.8  | 5.75 | 46.67 |
| chr5 | 50485135 | 50486659 | 1525 | 829  | 36 | 58.19 | 6.98 | 54.08 |
| chr5 | 50559434 | 50560345 | 912  | 636  | 21 | 38.78 | 4.52 | 46.06 |
| chr5 | 50570352 | 50571349 | 998  | 367  | 22 | 33.85 | 4.52 | 48.73 |
| chr5 | 50749131 | 50749953 | 823  | 567  | 18 | 31.11 | 5.34 | 50.68 |
| chr5 | 50894640 | 50895638 | 999  | 419  | 21 | 33.79 | 4.52 | 48.82 |
| chr5 | 51017973 | 51018987 | 1015 | 527  | 24 | 41.27 | 4.93 | 46.9  |
| chr5 | 51477420 | 51478167 | 748  | 282  | 17 | 31.19 | 4.93 | 50.55 |
| chr5 | 51726421 | 51727175 | 755  | 560  | 18 | 35.21 | 4.93 | 47.17 |
| chr5 | 52081207 | 52082232 | 1026 | 520  | 25 | 45.01 | 5.34 | 49.03 |
| chr5 | 52226355 | 52227266 | 912  | 636  | 20 | 34.47 | 4.52 | 47.74 |
| chr5 | 52515590 | 52516182 | 593  | 277  | 15 | 32.02 | 5.75 | 49.77 |
| chr5 | 52558528 | 52559598 | 1071 | 272  | 22 | 30.16 | 4.11 | 51.62 |
| chr5 | 52985429 | 52986102 | 674  | 271  | 16 | 31.3  | 5.75 | 50.33 |
| chr5 | 53069796 | 53071107 | 1312 | 538  | 29 | 45.26 | 6.57 | 49.25 |
| chr5 | 53513134 | 53514160 | 1027 | 270  | 23 | 32.12 | 4.95 | 49.74 |
| chr5 | 53538940 | 53539996 | 1057 | 800  | 25 | 38.3  | 6.09 | 46.39 |
| chr5 | 53713885 | 53714940 | 1056 | 722  | 28 | 37.22 | 4.98 | 46.81 |
| chr5 | 53749741 | 53750614 | 874  | 654  | 20 | 36.71 | 5.75 | 46.91 |
| chr5 | 53812705 | 53813869 | 1165 | 591  | 26 | 41.07 | 5.34 | 46.37 |
| chr5 | 54288978 | 54289807 | 830  | 573  | 18 | 30.71 | 4.52 | 50.99 |
| chr5 | 54572107 | 54573081 | 975  | 689  | 24 | 39.08 | 4.57 | 46.3  |
| chr5 | 54644756 | 54645894 | 1139 | 705  | 27 | 31.28 | 5.82 | 50.45 |
| chr5 | 54982251 | 54983114 | 864  | 256  | 21 | 37.53 | 4.95 | 45.97 |
| chr5 | 55016518 | 55017261 | 744  | 287  | 18 | 35.93 | 6.98 | 47.06 |
| chr5 | 55153481 | 55154394 | 914  | 221  | 23 | 33.57 | 4.17 | 48.64 |
| chr5 | 55234300 | 55236093 | 1794 | 437  | 39 | 31.95 | 4.36 | 49.8  |
| chr5 | 55302274 | 55303192 | 919  | 570  | 23 | 42.83 | 6.57 | 47.28 |
| chr5 | 55657693 | 55658798 | 1106 | 553  | 23 | 32.25 | 5.34 | 50.03 |
| chr5 | 55675350 | 55676492 | 1143 | 636  | 24 | 33.16 | 6.45 | 49.17 |
| chr5 | 55737673 | 55738835 | 1163 | 770  | 27 | 33.54 | 4.79 | 48.67 |
| chr5 | 55766997 | 55768332 | 1336 | 619  | 28 | 34.99 | 5.33 | 47.59 |
| chr5 | 56085631 | 56086325 | 695  | 282  | 19 | 44.34 | 5.75 | 48.43 |

|      |          |          |      |      |    |       |      |       |
|------|----------|----------|------|------|----|-------|------|-------|
| chr5 | 56167021 | 56168368 | 1348 | 834  | 39 | 66.64 | 6.92 | 55.26 |
| chr5 | 56207493 | 56209257 | 1765 | 1245 | 38 | 36.05 | 5.04 | 46.93 |
| chr5 | 56594863 | 56596019 | 1157 | 570  | 26 | 30.38 | 5.48 | 51.64 |
| chr5 | 56827916 | 56828901 | 986  | 639  | 20 | 30.51 | 4.93 | 51.28 |
| chr5 | 57023852 | 57024844 | 993  | 748  | 23 | 33.35 | 4.52 | 48.69 |
| chr5 | 57278911 | 57280086 | 1176 | 595  | 26 | 40.46 | 6.16 | 46.92 |
| chr5 | 57694698 | 57695816 | 1119 | 608  | 25 | 39.5  | 6.57 | 47    |
| chr5 | 57726143 | 57727280 | 1138 | 629  | 25 | 38.46 | 5.34 | 46.38 |
| chr5 | 57731265 | 57732433 | 1169 | 749  | 29 | 53.89 | 6.16 | 52.64 |
| chr5 | 57772445 | 57773232 | 788  | 285  | 20 | 42.36 | 5.75 | 46.98 |
| chr5 | 58000676 | 58001510 | 835  | 380  | 19 | 32.58 | 5.51 | 49.33 |
| chr5 | 58138128 | 58139134 | 1007 | 533  | 22 | 33.37 | 5.75 | 48.68 |
| chr5 | 58256637 | 58257526 | 890  | 632  | 20 | 35.75 | 4.93 | 47.03 |
| chr5 | 58747180 | 58747960 | 781  | 507  | 20 | 42.86 | 6.16 | 47.25 |
| chr5 | 58876297 | 58877350 | 1054 | 574  | 23 | 34.89 | 5.34 | 47.58 |
| chr5 | 59091884 | 59093203 | 1320 | 736  | 30 | 43.26 | 5.71 | 47.81 |
| chr5 | 59402725 | 59403671 | 947  | 664  | 24 | 45.59 | 6.16 | 50.3  |
| chr5 | 59420270 | 59422142 | 1873 | 1295 | 38 | 36.06 | 4.63 | 47.04 |
| chr5 | 59456183 | 59457353 | 1171 | 489  | 24 | 30.53 | 5.12 | 51.25 |
| chr5 | 59565403 | 59567023 | 1621 | 612  | 31 | 37.71 | 4.93 | 46.48 |
| chr5 | 59708938 | 59709855 | 918  | 644  | 23 | 42.9  | 6.16 | 47.37 |
| chr5 | 59853292 | 59854324 | 1033 | 468  | 22 | 32.03 | 4.93 | 49.77 |
| chr5 | 59921517 | 59922510 | 994  | 254  | 22 | 31.22 | 4.28 | 50.53 |
| chr5 | 60378248 | 60379765 | 1518 | 1099 | 37 | 38.79 | 4.36 | 46.08 |
| chr5 | 60412051 | 60413090 | 1040 | 704  | 25 | 44.13 | 4.93 | 47.92 |
| chr5 | 60457721 | 60458540 | 820  | 431  | 19 | 31.8  | 6.09 | 49.83 |
| chr5 | 60900750 | 60901802 | 1053 | 540  | 23 | 34.95 | 5.75 | 47.67 |
| chr5 | 61534911 | 61535792 | 882  | 590  | 19 | 31.98 | 5.34 | 49.78 |
| chr5 | 61653507 | 61654452 | 946  | 366  | 24 | 38.92 | 5.52 | 46.29 |
| chr5 | 62052355 | 62053705 | 1351 | 643  | 32 | 55.73 | 5.75 | 53.79 |
| chr5 | 62188969 | 62189913 | 945  | 690  | 20 | 32.64 | 4.11 | 49.32 |
| chr5 | 62447382 | 62448392 | 1011 | 509  | 24 | 38.94 | 5.12 | 46.21 |
| chr5 | 62905003 | 62907041 | 2039 | 1340 | 43 | 47.37 | 5.71 | 48.48 |
| chr5 | 63647392 | 63648162 | 771  | 555  | 18 | 30.59 | 4.19 | 51.24 |
| chr5 | 63664681 | 63665394 | 714  | 503  | 17 | 33.29 | 3.7  | 48.83 |
| chr5 | 63680529 | 63681305 | 777  | 281  | 20 | 33.35 | 3.42 | 48.7  |
| chr5 | 64024655 | 64026044 | 1390 | 583  | 26 | 30.29 | 6.57 | 51.69 |
| chr5 | 64040532 | 64041823 | 1292 | 478  | 28 | 31.13 | 5.19 | 50.64 |
| chr5 | 64472457 | 64473364 | 908  | 621  | 19 | 30.57 | 4.93 | 51.17 |
| chr5 | 64595056 | 64595963 | 908  | 265  | 20 | 34.7  | 4.52 | 47.74 |
| chr5 | 64614655 | 64615496 | 842  | 473  | 18 | 30.05 | 4.52 | 51.39 |
| chr5 | 64735882 | 64737135 | 1254 | 481  | 30 | 39.39 | 4.79 | 46.93 |
| chr5 | 64737507 | 64738104 | 598  | 287  | 16 | 36.58 | 6.16 | 46.88 |
| chr5 | 65232311 | 65233613 | 1303 | 566  | 29 | 43.53 | 5.58 | 48.12 |
| chr5 | 65331971 | 65333653 | 1683 | 463  | 47 | 63.93 | 4.8  | 53.73 |
| chr5 | 65339430 | 65340668 | 1239 | 305  | 34 | 37.7  | 3.42 | 46.55 |
| chr5 | 65346481 | 65348159 | 1679 | 1311 | 37 | 39.95 | 4.19 | 46.71 |
| chr5 | 65421603 | 65422367 | 765  | 401  | 18 | 34.57 | 5.34 | 47.72 |
| chr5 | 66325728 | 66326642 | 915  | 272  | 23 | 43.1  | 5.75 | 47.16 |
| chr5 | 66970194 | 66971189 | 996  | 383  | 21 | 33.95 | 5.75 | 48.63 |
| chr5 | 67556426 | 67557551 | 1126 | 706  | 26 | 43.29 | 5.34 | 48    |
| chr5 | 67641607 | 67642411 | 805  | 550  | 18 | 32.14 | 4.11 | 49.83 |

|      |          |          |      |      |    |       |      |       |
|------|----------|----------|------|------|----|-------|------|-------|
| chr5 | 68273517 | 68274893 | 1377 | 633  | 28 | 37.99 | 4.93 | 46.47 |
| chr5 | 68389851 | 68390875 | 1025 | 554  | 26 | 31.88 | 4.67 | 49.82 |
| chr5 | 68614254 | 68615020 | 767  | 395  | 19 | 39.05 | 6.16 | 46.26 |
| chr5 | 68798743 | 68799610 | 868  | 617  | 21 | 36.67 | 5.27 | 47.01 |
| chr5 | 68866780 | 68869930 | 3151 | 1627 | 73 | 68.58 | 4.8  | 55.81 |
| chr5 | 69087476 | 69088361 | 886  | 602  | 25 | 36.83 | 4.05 | 46.9  |
| chr5 | 69262774 | 69264640 | 1867 | 1211 | 42 | 32.32 | 4.39 | 50.01 |
| chr5 | 69593324 | 69596601 | 3278 | 912  | 80 | 43.31 | 3.55 | 48.07 |
| chr5 | 69800478 | 69801455 | 978  | 700  | 22 | 34.93 | 5.34 | 47.58 |
| chr5 | 70008621 | 70010673 | 2053 | 1474 | 54 | 34.41 | 3.91 | 47.75 |
| chr5 | 70161473 | 70162941 | 1469 | 1218 | 31 | 36.95 | 3.68 | 46.92 |
| chr5 | 70238454 | 70240686 | 2233 | 936  | 49 | 55.6  | 3.68 | 53.95 |
| chr5 | 70381855 | 70383006 | 1152 | 781  | 28 | 42.67 | 5.89 | 47.38 |
| chr5 | 70455745 | 70457444 | 1700 | 527  | 41 | 31.18 | 3.81 | 50.57 |
| chr5 | 70687419 | 70688642 | 1224 | 488  | 29 | 44.75 | 5.33 | 48.92 |
| chr5 | 71065790 | 71067617 | 1828 | 1405 | 33 | 35.89 | 4.93 | 46.94 |
| chr5 | 71306350 | 71307417 | 1068 | 684  | 23 | 34.16 | 5.75 | 48.02 |
| chr5 | 71347135 | 71348328 | 1194 | 610  | 26 | 39.49 | 4.93 | 46.95 |
| chr5 | 71940524 | 71941044 | 521  | 260  | 15 | 42.93 | 6.16 | 47.38 |
| chr5 | 72111479 | 72112918 | 1440 | 943  | 41 | 30.54 | 4.34 | 51.26 |
| chr5 | 73638160 | 73639513 | 1354 | 741  | 26 | 31.81 | 6.57 | 49.83 |
| chr5 | 73897256 | 73898175 | 920  | 566  | 21 | 38.29 | 5.34 | 46.31 |
| chr5 | 74098624 | 74099563 | 940  | 685  | 22 | 34.16 | 4.67 | 48.03 |
| chr5 | 74119841 | 74120818 | 978  | 386  | 20 | 30.91 | 4.11 | 50.61 |
| chr5 | 74517885 | 74518801 | 917  | 574  | 19 | 30.1  | 4.52 | 51.55 |
| chr5 | 74837258 | 74838139 | 882  | 463  | 20 | 34    | 5.12 | 48.55 |
| chr5 | 75374275 | 75374962 | 688  | 404  | 17 | 35.01 | 5.75 | 47.55 |
| chr5 | 75647824 | 75648924 | 1101 | 417  | 27 | 49.22 | 6.16 | 50.95 |
| chr5 | 75915370 | 75916352 | 983  | 702  | 26 | 52.57 | 6.57 | 50.24 |
| chr5 | 76548061 | 76549653 | 1593 | 1050 | 30 | 38.94 | 4.11 | 46.13 |
| chr5 | 76636593 | 76637337 | 745  | 248  | 17 | 31.37 | 4.11 | 50.22 |
| chr5 | 76885385 | 76886006 | 622  | 290  | 16 | 30.99 | 5.65 | 50.5  |
| chr5 | 76991764 | 76993108 | 1345 | 653  | 31 | 45.79 | 6.47 | 50    |
| chr5 | 77080147 | 77082277 | 2131 | 692  | 51 | 40.33 | 4.28 | 46.85 |
| chr5 | 77583679 | 77584768 | 1090 | 321  | 27 | 49.93 | 5.34 | 51.63 |
| chr5 | 77990301 | 77991281 | 981  | 654  | 23 | 38.98 | 5.34 | 46.13 |
| chr5 | 78221730 | 78222733 | 1004 | 535  | 21 | 33.53 | 6.16 | 48.64 |
| chr5 | 78679291 | 78680861 | 1571 | 534  | 36 | 48.88 | 5.33 | 50.37 |
| chr5 | 78737413 | 78738074 | 662  | 290  | 17 | 36.82 | 5.34 | 46.81 |
| chr5 | 79574827 | 79575614 | 788  | 279  | 18 | 33.15 | 4.52 | 49.12 |
| chr5 | 79819340 | 79820143 | 804  | 427  | 20 | 38.29 | 4.67 | 46.34 |
| chr5 | 79899231 | 79900390 | 1160 | 621  | 25 | 37.29 | 6.16 | 46.71 |
| chr5 | 79934595 | 79935602 | 1008 | 719  | 21 | 31.09 | 4.72 | 50.71 |
| chr5 | 80061350 | 80062710 | 1361 | 951  | 31 | 30.78 | 4.36 | 50.99 |
| chr5 | 80410474 | 80411696 | 1223 | 458  | 31 | 32.08 | 4.57 | 49.8  |
| chr5 | 80814065 | 80816872 | 2808 | 1415 | 59 | 31.12 | 3.42 | 50.69 |
| chr5 | 81162470 | 81163454 | 985  | 714  | 23 | 34.41 | 6.09 | 47.76 |
| chr5 | 81193209 | 81194994 | 1786 | 337  | 33 | 32.14 | 4.19 | 49.9  |
| chr5 | 81386115 | 81386827 | 713  | 440  | 18 | 34.28 | 5.71 | 47.83 |
| chr5 | 81389820 | 81391073 | 1254 | 627  | 26 | 36.42 | 7.39 | 47.14 |
| chr5 | 81393523 | 81394493 | 971  | 290  | 20 | 31.27 | 4.52 | 50.48 |
| chr5 | 81550262 | 81551908 | 1647 | 1006 | 42 | 77.22 | 6.16 | 55.07 |

|      |          |          |      |      |    |       |      |       |
|------|----------|----------|------|------|----|-------|------|-------|
| chr5 | 81849639 | 81850818 | 1180 | 629  | 24 | 32.46 | 6.16 | 49.44 |
| chr5 | 81930004 | 81930978 | 975  | 688  | 21 | 35.1  | 4.11 | 47.34 |
| chr5 | 82085815 | 82086874 | 1060 | 516  | 22 | 30.69 | 4.52 | 51.01 |
| chr5 | 82357638 | 82358691 | 1054 | 475  | 22 | 30.98 | 6.16 | 50.46 |
| chr5 | 82442499 | 82443369 | 871  | 464  | 20 | 36.89 | 6.16 | 46.68 |
| chr5 | 82634003 | 82635466 | 1464 | 890  | 31 | 45.16 | 4.93 | 48.94 |
| chr5 | 82683373 | 82684127 | 755  | 477  | 17 | 30.77 | 5.34 | 50.95 |
| chr5 | 82702944 | 82704438 | 1495 | 274  | 32 | 41.6  | 4.19 | 47.18 |
| chr5 | 82875664 | 82876718 | 1055 | 786  | 23 | 34.84 | 5.34 | 47.54 |
| chr5 | 83127950 | 83129155 | 1206 | 531  | 25 | 30.56 | 6.09 | 51.26 |
| chr5 | 84410093 | 84411646 | 1554 | 210  | 39 | 47.56 | 3.59 | 49.04 |
| chr5 | 84485720 | 84487522 | 1803 | 1122 | 35 | 43.79 | 4.93 | 47.82 |
| chr5 | 84662188 | 84663197 | 1010 | 395  | 24 | 41.57 | 8.22 | 47.23 |
| chr5 | 84966543 | 84967260 | 718  | 380  | 17 | 33.04 | 5.75 | 49.11 |
| chr5 | 85030068 | 85030818 | 751  | 276  | 20 | 45.08 | 7.39 | 48.88 |
| chr5 | 85070461 | 85071144 | 684  | 400  | 16 | 30.67 | 4.93 | 50.97 |
| chr5 | 85449947 | 85451208 | 1262 | 593  | 27 | 39.89 | 6.98 | 46.59 |
| chr5 | 85775947 | 85776549 | 603  | 312  | 20 | 58.19 | 6.98 | 54.24 |
| chr5 | 85932037 | 85933012 | 976  | 238  | 25 | 48.3  | 5.34 | 49.55 |
| chr5 | 86610088 | 86611074 | 987  | 616  | 20 | 30.46 | 3.7  | 51.3  |
| chr5 | 86611611 | 86612522 | 912  | 640  | 19 | 30.36 | 4.52 | 51.57 |
| chr5 | 86678949 | 86680592 | 1644 | 1387 | 32 | 32.48 | 3.31 | 49.47 |
| chr5 | 87170587 | 87171739 | 1153 | 586  | 25 | 37.66 | 5.75 | 46.07 |
| chr5 | 87336364 | 87337959 | 1596 | 447  | 31 | 35.25 | 4.29 | 47.3  |
| chr5 | 87548492 | 87550508 | 2017 | 482  | 42 | 31.1  | 3.74 | 50.62 |
| chr5 | 87935204 | 87936127 | 924  | 345  | 22 | 33.88 | 4.19 | 48.6  |
| chr5 | 88176032 | 88177351 | 1320 | 528  | 40 | 42    | 4.25 | 47.15 |
| chr5 | 88624925 | 88626092 | 1168 | 348  | 25 | 36.88 | 4.93 | 46.69 |
| chr5 | 88820056 | 88820813 | 758  | 380  | 19 | 39.68 | 6.16 | 46.53 |
| chr5 | 89644158 | 89645179 | 1022 | 290  | 26 | 32.05 | 5.6  | 49.8  |
| chr5 | 89658000 | 89659338 | 1339 | 597  | 30 | 47.88 | 6.16 | 49.14 |
| chr5 | 89832218 | 89833045 | 828  | 264  | 18 | 30.83 | 6.16 | 50.88 |
| chr5 | 89991079 | 89991997 | 919  | 289  | 20 | 34.07 | 5.34 | 48.23 |
| chr5 | 90173055 | 90174903 | 1849 | 1098 | 39 | 45.83 | 4.57 | 49.89 |
| chr5 | 90396221 | 90397221 | 1001 | 749  | 24 | 37.51 | 4.57 | 46.05 |
| chr5 | 91237044 | 91237942 | 899  | 435  | 19 | 31.05 | 4.52 | 50.69 |
| chr5 | 91417403 | 91418427 | 1025 | 599  | 23 | 36.46 | 5.75 | 47.18 |
| chr5 | 91610371 | 91611393 | 1023 | 473  | 24 | 40.79 | 5.75 | 46.36 |
| chr5 | 91780759 | 91781516 | 758  | 227  | 18 | 35.02 | 4.52 | 47.53 |
| chr5 | 92488923 | 92489911 | 989  | 329  | 21 | 34.33 | 6.57 | 47.78 |
| chr5 | 92626165 | 92627009 | 845  | 383  | 19 | 34.09 | 4.52 | 48.17 |
| chr5 | 93245650 | 93246568 | 919  | 604  | 21 | 35.38 | 5.45 | 47.59 |
| chr5 | 93949226 | 93950147 | 922  | 278  | 23 | 39.44 | 5.06 | 47.11 |
| chr5 | 94039088 | 94040519 | 1432 | 784  | 33 | 48.44 | 5.58 | 49.14 |
| chr5 | 94200225 | 94201141 | 917  | 634  | 19 | 30.1  | 4.93 | 51.55 |
| chr5 | 94829182 | 94830663 | 1482 | 976  | 39 | 51.84 | 4.89 | 51.1  |
| chr5 | 94916412 | 94917359 | 948  | 616  | 23 | 31.85 | 4.54 | 49.79 |
| chr5 | 94971327 | 94972414 | 1088 | 434  | 23 | 33.14 | 5.75 | 49.16 |
| chr5 | 94995713 | 94996927 | 1215 | 817  | 28 | 34.33 | 6.51 | 47.79 |
| chr5 | 95288051 | 95288755 | 705  | 285  | 18 | 38.6  | 4.93 | 46.11 |
| chr5 | 95376543 | 95377087 | 545  | 272  | 16 | 42.93 | 6.57 | 47.38 |
| chr5 | 95402163 | 95403382 | 1220 | 809  | 27 | 42.14 | 6.57 | 46.95 |

|      |           |           |      |      |    |       |      |       |
|------|-----------|-----------|------|------|----|-------|------|-------|
| chr5 | 95840288  | 95841540  | 1253 | 388  | 29 | 48.63 | 4.93 | 49.9  |
| chr5 | 95988832  | 95991016  | 2185 | 643  | 50 | 52.42 | 4.41 | 50.54 |
| chr5 | 96478481  | 96479446  | 966  | 500  | 24 | 34.05 | 4.84 | 48.52 |
| chr5 | 96502617  | 96503984  | 1368 | 833  | 31 | 34.15 | 4.94 | 48.02 |
| chr5 | 96917013  | 96917839  | 827  | 537  | 18 | 30.88 | 4.11 | 50.73 |
| chr5 | 96993225  | 96994114  | 890  | 239  | 20 | 31.81 | 4.95 | 49.81 |
| chr5 | 97464693  | 97465527  | 835  | 242  | 18 | 30.44 | 5.75 | 51.32 |
| chr5 | 98803689  | 98804522  | 834  | 580  | 18 | 30.49 | 5.34 | 51.26 |
| chr5 | 98848381  | 98849553  | 1173 | 662  | 27 | 39.67 | 6.47 | 46.51 |
| chr5 | 98912661  | 98913518  | 858  | 441  | 19 | 33.33 | 6.16 | 48.66 |
| chr5 | 99152588  | 99153694  | 1107 | 493  | 28 | 53.41 | 6.57 | 51.64 |
| chr5 | 99181703  | 99182680  | 978  | 690  | 21 | 30.9  | 4.95 | 50.66 |
| chr5 | 99527185  | 99528024  | 840  | 266  | 18 | 30.16 | 5.75 | 51.72 |
| chr5 | 99589965  | 99591417  | 1453 | 672  | 33 | 49.76 | 5.34 | 51.98 |
| chr5 | 99904459  | 99905615  | 1157 | 618  | 24 | 33.56 | 6.57 | 48.56 |
| chr5 | 100260720 | 100262349 | 1630 | 885  | 37 | 40.71 | 5.14 | 46.54 |
| chr5 | 100538495 | 100539012 | 518  | 259  | 19 | 66.39 | 7.8  | 55    |
| chr5 | 100626634 | 100627607 | 974  | 441  | 20 | 30.16 | 4.83 | 51.7  |
| chr5 | 100855099 | 100856048 | 950  | 658  | 20 | 32.37 | 4.93 | 49.78 |
| chr5 | 101638964 | 101639826 | 863  | 579  | 19 | 33.05 | 4.93 | 49.1  |
| chr5 | 101641938 | 101642972 | 1035 | 696  | 23 | 35.91 | 4.52 | 47.04 |
| chr5 | 101646158 | 101647056 | 899  | 257  | 19 | 31.05 | 4.93 | 50.69 |
| chr5 | 101726859 | 101727865 | 1007 | 423  | 24 | 41.76 | 4.93 | 47.11 |
| chr5 | 101863716 | 101864565 | 850  | 345  | 19 | 33.8  | 4.52 | 48.83 |
| chr5 | 101890310 | 101891123 | 814  | 526  | 19 | 30.06 | 4.74 | 51.47 |
| chr5 | 102398883 | 102399762 | 880  | 625  | 19 | 32.09 | 4.93 | 49.72 |
| chr5 | 102551218 | 102552194 | 977  | 688  | 20 | 30.96 | 5.34 | 50.47 |
| chr5 | 103796034 | 103796969 | 936  | 524  | 20 | 33.13 | 5.75 | 49.14 |
| chr5 | 103916226 | 103917262 | 1037 | 631  | 22 | 31.83 | 4.52 | 49.81 |
| chr5 | 104148648 | 104149561 | 914  | 279  | 19 | 30.26 | 5.34 | 51.67 |
| chr5 | 104620397 | 104621260 | 864  | 637  | 19 | 32.99 | 4.93 | 49.23 |
| chr5 | 104868639 | 104869618 | 980  | 272  | 22 | 30.23 | 4.52 | 51.73 |
| chr5 | 104881735 | 104882448 | 714  | 459  | 17 | 33.29 | 6.16 | 48.83 |
| chr5 | 104972686 | 104973658 | 973  | 289  | 20 | 31.17 | 5.34 | 50.55 |
| chr5 | 104990966 | 104992038 | 1073 | 354  | 24 | 37.93 | 5.75 | 46.54 |
| chr5 | 105105165 | 105105904 | 740  | 270  | 18 | 36.19 | 4.93 | 46.9  |
| chr5 | 105110262 | 105111203 | 942  | 309  | 21 | 36.98 | 4.93 | 46.95 |
| chr5 | 105154728 | 105155774 | 1047 | 364  | 21 | 31.33 | 4.11 | 50.27 |
| chr5 | 105636042 | 105636897 | 856  | 571  | 19 | 33.45 | 5.34 | 48.63 |
| chr5 | 105787088 | 105787916 | 829  | 540  | 19 | 35.05 | 5.75 | 47.49 |
| chr5 | 105946055 | 105946650 | 596  | 306  | 15 | 31.82 | 5.75 | 49.82 |
| chr5 | 106375177 | 106375970 | 794  | 372  | 18 | 32.79 | 5.34 | 49.41 |
| chr5 | 106510764 | 106511474 | 711  | 285  | 17 | 33.48 | 5.75 | 48.67 |
| chr5 | 106566208 | 106567120 | 913  | 257  | 21 | 38.72 | 4.93 | 46.27 |
| chr5 | 106569544 | 106570676 | 1133 | 344  | 23 | 30.96 | 5.75 | 50.53 |
| chr5 | 107466894 | 107467516 | 623  | 220  | 16 | 31.4  | 5.33 | 50.21 |
| chr5 | 107596057 | 107597278 | 1222 | 587  | 29 | 33.08 | 4.48 | 49.16 |
| chr5 | 107756183 | 107757099 | 917  | 291  | 22 | 36.12 | 5.12 | 46.98 |
| chr5 | 107981413 | 107982219 | 807  | 262  | 23 | 46.09 | 5.71 | 49.41 |
| chr5 | 109544911 | 109545588 | 678  | 229  | 19 | 45.71 | 6.16 | 49.85 |
| chr5 | 109628529 | 109629574 | 1046 | 559  | 21 | 31.38 | 4.93 | 50.17 |
| chr5 | 109655550 | 109657042 | 1493 | 1100 | 33 | 44.21 | 4.33 | 48.14 |



|      |           |           |      |      |     |       |      |       |
|------|-----------|-----------|------|------|-----|-------|------|-------|
| chr5 | 110044490 | 110045347 | 858  | 456  | 22  | 32.23 | 5.14 | 50    |
| chr5 | 110103188 | 110104349 | 1162 | 642  | 24  | 33.32 | 6.16 | 48.76 |
| chr5 | 110231968 | 110233578 | 1611 | 502  | 35  | 43.1  | 5.33 | 47.21 |
| chr5 | 110374812 | 110375475 | 664  | 268  | 18  | 41.65 | 6.16 | 47.1  |
| chr5 | 110385142 | 110385896 | 755  | 480  | 19  | 39.88 | 5.75 | 46.64 |
| chr5 | 110734533 | 110735271 | 739  | 268  | 19  | 41.02 | 6.16 | 46.25 |
| chr5 | 111044927 | 111045986 | 1060 | 671  | 21  | 30.69 | 5.34 | 51.01 |
| chr5 | 111203540 | 111204258 | 719  | 508  | 18  | 35.52 | 5.12 | 47.27 |
| chr5 | 111514273 | 111515500 | 1228 | 584  | 25  | 31.46 | 7.48 | 50.04 |
| chr5 | 111669557 | 111670497 | 941  | 705  | 23  | 41.42 | 5.75 | 47.09 |
| chr5 | 111994945 | 111996440 | 1496 | 911  | 33  | 36.1  | 3.88 | 46.98 |
| chr5 | 112061006 | 112062695 | 1690 | 914  | 40  | 39.66 | 4.05 | 46.5  |
| chr5 | 112173319 | 112180308 | 6990 | 4815 | 187 | 72.19 | 4.58 | 58.06 |
| chr5 | 112215769 | 112216984 | 1216 | 582  | 27  | 38.06 | 4.62 | 46.41 |
| chr5 | 112437118 | 112438452 | 1335 | 557  | 33  | 48.66 | 4.84 | 50.16 |
| chr5 | 112640005 | 112640964 | 960  | 440  | 24  | 44.73 | 6.16 | 48.83 |
| chr5 | 112799884 | 112801034 | 1151 | 695  | 25  | 37.77 | 6.98 | 46.62 |
| chr5 | 112915093 | 112916165 | 1073 | 581  | 24  | 35.44 | 6.69 | 47.41 |
| chr5 | 112931599 | 112932663 | 1065 | 371  | 29  | 34.55 | 5.14 | 47.81 |
| chr5 | 112945838 | 112946766 | 929  | 640  | 20  | 32.53 | 5.64 | 49.4  |
| chr5 | 113676461 | 113677735 | 1275 | 801  | 25  | 31.74 | 5.75 | 49.76 |
| chr5 | 113685433 | 113686460 | 1028 | 752  | 22  | 32.28 | 4.52 | 50.03 |
| chr5 | 113704833 | 113705702 | 870  | 618  | 20  | 36.95 | 4.52 | 46.89 |
| chr5 | 114225878 | 114227447 | 1570 | 288  | 38  | 47.34 | 3.77 | 48.26 |
| chr5 | 114238239 | 114239452 | 1214 | 620  | 24  | 30.89 | 6.98 | 50.79 |
| chr5 | 114402324 | 114403914 | 1591 | 343  | 32  | 37.05 | 4.95 | 47.05 |
| chr5 | 114467593 | 114468708 | 1116 | 567  | 24  | 35.62 | 5.75 | 47.31 |
| chr5 | 114745132 | 114746710 | 1579 | 262  | 33  | 43.25 | 3.7  | 47.78 |
| chr5 | 114833728 | 114834924 | 1197 | 470  | 24  | 31.66 | 5.75 | 49.84 |
| chr5 | 114850032 | 114850909 | 878  | 277  | 19  | 31.84 | 5.3  | 49.77 |
| chr5 | 115204770 | 115205905 | 1136 | 328  | 31  | 56.58 | 4.79 | 53.48 |
| chr5 | 115235648 | 115236912 | 1265 | 575  | 31  | 42.49 | 3.77 | 47.31 |
| chr5 | 115270309 | 115271113 | 805  | 538  | 18  | 32.14 | 5.34 | 49.83 |
| chr5 | 115273425 | 115274480 | 1056 | 636  | 21  | 30.89 | 4.52 | 50.76 |
| chr5 | 115309963 | 115310651 | 689  | 354  | 18  | 39.76 | 6.16 | 46.71 |
| chr5 | 115478126 | 115479478 | 1353 | 687  | 37  | 48.28 | 6.85 | 49.36 |
| chr5 | 115608608 | 115609588 | 981  | 577  | 23  | 32.83 | 4.79 | 49.43 |
| chr5 | 115667064 | 115668590 | 1527 | 237  | 33  | 45.83 | 4.11 | 49.92 |
| chr5 | 116048423 | 116049309 | 887  | 671  | 19  | 31.7  | 4.52 | 49.74 |
| chr5 | 116128053 | 116129180 | 1128 | 489  | 24  | 35.01 | 5.34 | 47.55 |
| chr5 | 116446291 | 116447122 | 832  | 548  | 19  | 34.87 | 5.75 | 47.65 |
| chr5 | 116586361 | 116587530 | 1170 | 427  | 24  | 32.93 | 4.52 | 49.34 |
| chr5 | 116660628 | 116661439 | 812  | 264  | 19  | 32.28 | 4.19 | 50.06 |
| chr5 | 116885450 | 116886347 | 898  | 607  | 19  | 31.11 | 4.52 | 50.64 |
| chr5 | 117571961 | 117572620 | 660  | 468  | 16  | 32.21 | 5.34 | 49.94 |
| chr5 | 117840502 | 117841326 | 825  | 549  | 18  | 30.99 | 4.11 | 50.47 |
| chr5 | 118200613 | 118201856 | 1244 | 449  | 28  | 39.67 | 4.95 | 46.5  |
| chr5 | 118234682 | 118236312 | 1631 | 1255 | 30  | 37.27 | 4.52 | 46.55 |
| chr5 | 118329428 | 118330449 | 1022 | 690  | 23  | 30.07 | 4.37 | 51.47 |
| chr5 | 118609370 | 118611548 | 2179 | 1588 | 49  | 30.23 | 4.18 | 51.74 |
| chr5 | 118974575 | 118975414 | 840  | 523  | 18  | 30.16 | 4.52 | 51.72 |
| chr5 | 118997716 | 118999293 | 1578 | 1060 | 30  | 36.08 | 4.52 | 46.95 |

|      |           |           |      |      |    |       |      |       |
|------|-----------|-----------|------|------|----|-------|------|-------|
| chr5 | 119092550 | 119094423 | 1874 | 422  | 40 | 55.28 | 5.34 | 53.42 |
| chr5 | 119271782 | 119272654 | 873  | 607  | 20 | 36.77 | 5.75 | 46.92 |
| chr5 | 119567334 | 119568089 | 756  | 539  | 17 | 30.71 | 4.11 | 51.03 |
| chr5 | 119583301 | 119584119 | 819  | 500  | 20 | 40.22 | 6.98 | 46.76 |
| chr5 | 119798287 | 119799227 | 941  | 559  | 21 | 35.98 | 4.83 | 47.09 |
| chr5 | 120839561 | 120840464 | 904  | 435  | 19 | 30.79 | 5.34 | 50.91 |
| chr5 | 121090086 | 121090889 | 804  | 495  | 19 | 32.77 | 5.33 | 49.41 |
| chr5 | 121238772 | 121240525 | 1754 | 507  | 37 | 34.99 | 4.11 | 47.62 |
| chr5 | 121780300 | 121781249 | 950  | 468  | 20 | 32.37 | 5.34 | 49.78 |
| chr5 | 121865721 | 121866511 | 791  | 219  | 18 | 32.62 | 6.12 | 49.43 |
| chr5 | 122161599 | 122162454 | 856  | 278  | 21 | 42.4  | 6.16 | 47.09 |
| chr5 | 122958336 | 122959492 | 1157 | 516  | 28 | 50.14 | 6.57 | 51.5  |
| chr5 | 123311805 | 123313137 | 1333 | 635  | 26 | 32.72 | 5.75 | 49.39 |
| chr5 | 123527136 | 123528052 | 917  | 633  | 19 | 30.1  | 4.52 | 51.55 |
| chr5 | 123741719 | 123742284 | 566  | 283  | 15 | 37.66 | 6.16 | 46.06 |
| chr5 | 123957027 | 123957916 | 890  | 621  | 19 | 31.54 | 5.34 | 49.9  |
| chr5 | 124023465 | 124025264 | 1800 | 702  | 32 | 37.01 | 4.93 | 46.96 |
| chr5 | 124429659 | 124430255 | 597  | 319  | 15 | 31.75 | 4.93 | 49.78 |
| chr5 | 125143254 | 125144729 | 1476 | 606  | 32 | 48.5  | 4.52 | 49.54 |
| chr5 | 125317000 | 125317948 | 949  | 688  | 20 | 32.43 | 5.34 | 49.57 |
| chr5 | 125345367 | 125346215 | 849  | 227  | 20 | 38.26 | 5.75 | 46.3  |
| chr5 | 125944075 | 125944842 | 768  | 501  | 19 | 37.98 | 5.24 | 46.4  |
| chr5 | 126234333 | 126235174 | 842  | 239  | 18 | 30.05 | 4.11 | 51.39 |
| chr5 | 126308503 | 126309178 | 676  | 393  | 17 | 33.85 | 5.51 | 48.76 |
| chr5 | 126408274 | 126409752 | 1479 | 905  | 32 | 48.34 | 5.34 | 49.3  |
| chr5 | 126717868 | 126720417 | 2550 | 593  | 54 | 36.72 | 3.74 | 47    |
| chr5 | 126873693 | 126876106 | 2414 | 628  | 62 | 46.87 | 3.72 | 47.4  |
| chr5 | 126908826 | 126909980 | 1155 | 450  | 26 | 41.63 | 4.52 | 47.13 |
| chr5 | 127046499 | 127047447 | 949  | 470  | 22 | 34.26 | 4.72 | 47.89 |
| chr5 | 127065006 | 127067300 | 2295 | 583  | 42 | 43.54 | 5.34 | 48.03 |
| chr5 | 127270611 | 127271414 | 804  | 250  | 20 | 37.08 | 4.19 | 46.94 |
| chr5 | 127371397 | 127374258 | 2862 | 456  | 70 | 59.86 | 4.76 | 56.64 |
| chr5 | 127464542 | 127465720 | 1179 | 467  | 34 | 41.42 | 5.71 | 47.05 |
| chr5 | 127483041 | 127484681 | 1641 | 928  | 43 | 44.79 | 5.06 | 48.99 |
| chr5 | 127793155 | 127794602 | 1448 | 267  | 32 | 50.03 | 5.34 | 51.84 |
| chr5 | 127857600 | 127858622 | 1023 | 576  | 21 | 32.54 | 5.34 | 49.37 |
| chr5 | 128007732 | 128008520 | 789  | 515  | 18 | 33.09 | 4.11 | 49.16 |
| chr5 | 128312686 | 128313258 | 573  | 286  | 15 | 32.66 | 6.16 | 49.32 |
| chr5 | 128408332 | 128409324 | 993  | 356  | 21 | 34.12 | 4.93 | 48.07 |
| chr5 | 128816671 | 128817617 | 947  | 571  | 23 | 41.04 | 6.16 | 46.42 |
| chr5 | 129044601 | 129045554 | 954  | 724  | 20 | 32.16 | 4.11 | 49.86 |
| chr5 | 129611734 | 129612690 | 957  | 564  | 20 | 32    | 4.52 | 49.74 |
| chr5 | 129680586 | 129681915 | 1330 | 495  | 28 | 34.57 | 5.27 | 47.74 |
| chr5 | 129774899 | 129776417 | 1519 | 1001 | 34 | 50.21 | 5.75 | 51.51 |
| chr5 | 129797279 | 129798204 | 926  | 541  | 20 | 33.68 | 5.75 | 48.64 |
| chr5 | 129822809 | 129823623 | 815  | 478  | 19 | 35.92 | 5.34 | 47.05 |
| chr5 | 129904421 | 129905214 | 794  | 482  | 19 | 37.25 | 4.93 | 46.46 |
| chr5 | 130600806 | 130602303 | 1498 | 1183 | 34 | 31.7  | 3.49 | 49.76 |
| chr5 | 130744808 | 130746257 | 1450 | 493  | 31 | 43.55 | 5.18 | 47.97 |
| chr5 | 130764571 | 130765824 | 1254 | 504  | 29 | 43.02 | 5.33 | 47.54 |
| chr5 | 131823475 | 131824489 | 1015 | 275  | 23 | 30.43 | 4.37 | 51.29 |
| chr5 | 131974309 | 131975043 | 735  | 450  | 18 | 36.53 | 6.57 | 46.94 |

|      |           |           |      |      |    |       |      |       |
|------|-----------|-----------|------|------|----|-------|------|-------|
| chr5 | 132958114 | 132958988 | 875  | 627  | 19 | 32.37 | 4.52 | 49.85 |
| chr5 | 133713791 | 133715146 | 1356 | 651  | 28 | 39.01 | 6.57 | 46.14 |
| chr5 | 134223200 | 134224184 | 985  | 417  | 21 | 32.29 | 4.33 | 50.09 |
| chr5 | 134291229 | 134291994 | 766  | 276  | 18 | 31.94 | 4.28 | 49.76 |
| chr5 | 134730298 | 134731303 | 1006 | 578  | 24 | 34.09 | 5.41 | 48.17 |
| chr5 | 134993083 | 134993814 | 732  | 346  | 17 | 32.16 | 5.34 | 49.88 |
| chr5 | 135283589 | 135284412 | 824  | 352  | 18 | 31.05 | 4.93 | 50.62 |
| chr5 | 136578936 | 136579927 | 992  | 278  | 20 | 30.21 | 5.75 | 51.73 |
| chr5 | 136911895 | 136912646 | 752  | 268  | 19 | 36.12 | 6.09 | 46.97 |
| chr5 | 137158057 | 137158851 | 795  | 242  | 19 | 37.19 | 6.16 | 46.82 |
| chr5 | 137889191 | 137891075 | 1885 | 1342 | 47 | 40.58 | 3.71 | 46.88 |
| chr5 | 138175499 | 138176392 | 894  | 288  | 19 | 31.32 | 4.11 | 50.32 |
| chr5 | 138549636 | 138550765 | 1130 | 558  | 24 | 34.91 | 5.34 | 47.61 |
| chr5 | 139255084 | 139255901 | 818  | 558  | 19 | 35.73 | 5.75 | 47.2  |
| chr5 | 139813372 | 139814151 | 780  | 410  | 20 | 37.53 | 4.84 | 45.95 |
| chr5 | 139862527 | 139863900 | 1374 | 934  | 32 | 35.18 | 3.52 | 47.09 |
| chr5 | 140043649 | 140045152 | 1504 | 285  | 37 | 47.61 | 4.81 | 48.94 |
| chr5 | 140086929 | 140087812 | 884  | 606  | 19 | 31.87 | 5.75 | 49.75 |
| chr5 | 140224626 | 140225753 | 1128 | 665  | 23 | 30.17 | 4.83 | 51.66 |
| chr5 | 140326923 | 140328768 | 1846 | 1565 | 39 | 40.46 | 3.92 | 46.9  |
| chr5 | 140653155 | 140653996 | 842  | 217  | 19 | 34.27 | 4.11 | 47.84 |
| chr5 | 140822716 | 140823634 | 919  | 655  | 22 | 38.35 | 4.52 | 46.36 |
| chr5 | 141118294 | 141119196 | 903  | 285  | 21 | 39.34 | 5.34 | 46.61 |
| chr5 | 141119985 | 141120895 | 911  | 621  | 21 | 38.84 | 6.57 | 46.22 |
| chr5 | 141302849 | 141304324 | 1476 | 760  | 42 | 43.29 | 6.06 | 47.97 |
| chr5 | 141432102 | 141432746 | 645  | 370  | 20 | 54.06 | 7.8  | 52.88 |
| chr5 | 141487732 | 141488916 | 1185 | 870  | 30 | 36.71 | 3.74 | 46.98 |
| chr5 | 141527046 | 141527895 | 850  | 429  | 21 | 35.46 | 4.69 | 47.4  |
| chr5 | 142098709 | 142099614 | 906  | 236  | 19 | 30.68 | 5.34 | 51.01 |
| chr5 | 143409795 | 143410622 | 828  | 509  | 23 | 49.26 | 6.57 | 51.13 |
| chr5 | 143473784 | 143474755 | 972  | 470  | 20 | 31.22 | 4.93 | 50.59 |
| chr5 | 143573648 | 143574322 | 675  | 263  | 20 | 38.71 | 5.27 | 46.25 |
| chr5 | 143635766 | 143636454 | 689  | 399  | 20 | 50.1  | 7.8  | 51.74 |
| chr5 | 143639353 | 143640278 | 926  | 246  | 20 | 33.68 | 4.11 | 48.64 |
| chr5 | 143829491 | 143830381 | 891  | 271  | 21 | 40.1  | 5.75 | 46.56 |
| chr5 | 144126782 | 144127617 | 836  | 279  | 20 | 39.1  | 5.34 | 46.36 |
| chr5 | 145385889 | 145387247 | 1359 | 772  | 26 | 31.59 | 6.16 | 50.03 |
| chr5 | 145468413 | 145469210 | 798  | 539  | 19 | 37    | 6.16 | 46.97 |
| chr5 | 145707293 | 145708227 | 935  | 451  | 21 | 33.25 | 5.33 | 48.93 |
| chr5 | 146747018 | 146748081 | 1064 | 416  | 22 | 30.5  | 4.52 | 51.32 |
| chr5 | 146975538 | 146976485 | 948  | 699  | 21 | 31.37 | 4.84 | 50.24 |
| chr5 | 147047181 | 147048014 | 834  | 576  | 19 | 33.78 | 4.43 | 48.73 |
| chr5 | 147061458 | 147062324 | 867  | 654  | 19 | 30.2  | 3.89 | 51.76 |
| chr5 | 147076619 | 147078681 | 2063 | 707  | 43 | 36.99 | 4.79 | 46.93 |
| chr5 | 147094347 | 147095699 | 1353 | 714  | 29 | 30.92 | 4.11 | 50.58 |
| chr5 | 147145404 | 147147829 | 2426 | 1087 | 59 | 43.54 | 3.62 | 48.06 |
| chr5 | 147459154 | 147459794 | 641  | 268  | 17 | 35.79 | 5.84 | 47.13 |
| chr5 | 147627425 | 147628285 | 861  | 263  | 20 | 37.51 | 5.75 | 46.02 |
| chr5 | 147792114 | 147793454 | 1341 | 671  | 26 | 32.37 | 6.98 | 49.77 |
| chr5 | 147835542 | 147836423 | 882  | 595  | 19 | 31.98 | 6.16 | 49.78 |
| chr5 | 148023645 | 148024406 | 762  | 505  | 21 | 49.32 | 5.34 | 51.08 |
| chr5 | 148746475 | 148747348 | 874  | 462  | 20 | 36.71 | 5.34 | 46.91 |

|      |           |           |      |      |    |        |      |       |
|------|-----------|-----------|------|------|----|--------|------|-------|
| chr5 | 148821860 | 148822802 | 943  | 581  | 21 | 36.92  | 4.11 | 46.83 |
| chr5 | 148919697 | 148920571 | 875  | 286  | 20 | 31.01  | 4.42 | 50.49 |
| chr5 | 149500302 | 149501806 | 1505 | 725  | 34 | 30.14  | 3.74 | 51.63 |
| chr5 | 149791311 | 149793180 | 1870 | 850  | 65 | 114.14 | 6.23 | 26.32 |
| chr5 | 150268282 | 150269047 | 766  | 271  | 17 | 30.13  | 4.52 | 51.65 |
| chr5 | 150348447 | 150349558 | 1112 | 634  | 25 | 35.24  | 5.33 | 47.29 |
| chr5 | 150359399 | 150360723 | 1325 | 562  | 28 | 40.57  | 4.93 | 46.84 |
| chr5 | 150437176 | 150439403 | 2228 | 478  | 57 | 43.84  | 4.58 | 47.89 |
| chr5 | 150814918 | 150815752 | 835  | 470  | 19 | 34.69  | 6.16 | 47.81 |
| chr5 | 151249208 | 151250233 | 1026 | 377  | 24 | 40.61  | 5.34 | 46.71 |
| chr5 | 151356570 | 151358190 | 1621 | 261  | 35 | 48.8   | 4.93 | 50.74 |
| chr5 | 151401511 | 151403075 | 1565 | 1327 | 34 | 41.76  | 4.19 | 47.06 |
| chr5 | 151652981 | 151654544 | 1564 | 1026 | 33 | 43.98  | 5.34 | 47.95 |
| chr5 | 152383620 | 152384652 | 1033 | 340  | 21 | 32.03  | 5.34 | 49.77 |
| chr5 | 152674127 | 152674963 | 837  | 263  | 18 | 30.33  | 5.34 | 51.59 |
| chr5 | 153403421 | 153405015 | 1595 | 485  | 39 | 66.99  | 6.16 | 55.78 |
| chr5 | 154366347 | 154367517 | 1171 | 507  | 24 | 32.88  | 6.98 | 49.32 |
| chr5 | 154564790 | 154566111 | 1322 | 620  | 27 | 36.89  | 6.16 | 46.7  |
| chr5 | 154617926 | 154618549 | 624  | 266  | 18 | 44.9   | 6.98 | 48.9  |
| chr5 | 154753255 | 154754183 | 929  | 255  | 22 | 33.59  | 5.33 | 48.7  |
| chr5 | 156025089 | 156026542 | 1454 | 1003 | 36 | 62.57  | 6.16 | 55.75 |
| chr5 | 156195895 | 156196886 | 992  | 235  | 25 | 43.7   | 5.84 | 48.02 |
| chr5 | 156261892 | 156262872 | 981  | 567  | 20 | 30.76  | 5.34 | 50.95 |
| chr5 | 156957359 | 156958350 | 992  | 523  | 20 | 30.21  | 5.75 | 51.73 |
| chr5 | 157339742 | 157341106 | 1365 | 735  | 28 | 38.57  | 5.75 | 46.12 |
| chr5 | 158147035 | 158148182 | 1148 | 534  | 27 | 30.81  | 5.17 | 51    |
| chr5 | 158466431 | 158468363 | 1933 | 590  | 40 | 42.51  | 5.52 | 47.33 |
| chr5 | 158856689 | 158857824 | 1136 | 594  | 25 | 38.57  | 6.57 | 46.2  |
| chr5 | 159487991 | 159488833 | 843  | 610  | 23 | 48.13  | 5.75 | 49.46 |
| chr5 | 159561278 | 159561831 | 554  | 277  | 16 | 42.93  | 6.57 | 47.38 |
| chr5 | 159766544 | 159767332 | 789  | 530  | 18 | 33.09  | 4.93 | 49.16 |
| chr5 | 160641376 | 160642247 | 872  | 593  | 21 | 37.02  | 5.71 | 46.96 |
| chr5 | 161104213 | 161105223 | 1011 | 369  | 21 | 33.16  | 6.16 | 49.1  |
| chr5 | 161164899 | 161165812 | 914  | 258  | 20 | 33.36  | 4.83 | 48.69 |
| chr5 | 161264770 | 161265630 | 861  | 233  | 19 | 33.16  | 4.52 | 49.11 |
| chr5 | 161836908 | 161837775 | 868  | 588  | 19 | 32.76  | 4.93 | 49.36 |
| chr5 | 161987344 | 161988287 | 944  | 276  | 22 | 36.86  | 6.16 | 46.73 |
| chr5 | 162265793 | 162266632 | 840  | 310  | 19 | 34.39  | 4.52 | 47.73 |
| chr5 | 162701291 | 162702438 | 1148 | 634  | 24 | 34     | 4.93 | 48.56 |
| chr5 | 162738034 | 162738799 | 766  | 288  | 18 | 34.51  | 4.93 | 47.68 |
| chr5 | 162804615 | 162805466 | 852  | 529  | 20 | 37.67  | 5.3  | 46.37 |
| chr5 | 162938226 | 162938895 | 670  | 410  | 19 | 40.42  | 5.52 | 46.97 |
| chr5 | 163834538 | 163835677 | 1140 | 517  | 23 | 30.63  | 4.93 | 51.19 |
| chr5 | 164039350 | 164040491 | 1142 | 586  | 26 | 42.36  | 6.98 | 47.03 |
| chr5 | 164346283 | 164347204 | 922  | 638  | 20 | 33.9   | 4.52 | 48.66 |
| chr5 | 164673498 | 164674226 | 729  | 400  | 19 | 41.75  | 5.75 | 47.11 |
| chr5 | 166434791 | 166436051 | 1261 | 485  | 29 | 48.16  | 6.98 | 49.56 |
| chr5 | 166646548 | 166647450 | 903  | 667  | 19 | 30.84  | 5.34 | 50.85 |
| chr5 | 168158678 | 168159877 | 1200 | 632  | 27 | 38.19  | 5.33 | 46.34 |
| chr5 | 170227986 | 170228862 | 877  | 475  | 19 | 32.26  | 4.52 | 49.99 |
| chr5 | 170399667 | 170400634 | 968  | 406  | 20 | 31.43  | 4.52 | 50.12 |
| chr5 | 170426462 | 170427413 | 952  | 361  | 20 | 32.27  | 4.93 | 50.07 |

|      |           |           |      |      |    |       |       |       |
|------|-----------|-----------|------|------|----|-------|-------|-------|
| chr5 | 170621090 | 170622235 | 1146 | 644  | 23 | 30.35 | 4.11  | 51.6  |
| chr5 | 171033490 | 171034420 | 931  | 641  | 20 | 33.4  | 4.52  | 48.71 |
| chr5 | 171184328 | 171186104 | 1777 | 1231 | 37 | 34.01 | 5.14  | 48.53 |
| chr5 | 171197935 | 171198766 | 832  | 484  | 18 | 30.6  | 5.34  | 51.25 |
| chr5 | 171415909 | 171416785 | 877  | 234  | 19 | 32.26 | 4.11  | 49.99 |
| chr5 | 171512068 | 171512788 | 721  | 291  | 18 | 33.74 | 3.42  | 48.67 |
| chr5 | 171524963 | 171525864 | 902  | 507  | 21 | 39.4  | 6.57  | 46.96 |
| chr5 | 171682898 | 171684028 | 1131 | 762  | 25 | 32.97 | 5.21  | 49.3  |
| chr5 | 172517017 | 172519252 | 2236 | 1229 | 50 | 41.31 | 4.05  | 46.94 |
| chr5 | 172532003 | 172533288 | 1286 | 778  | 26 | 34.87 | 5.34  | 47.61 |
| chr5 | 172560625 | 172562242 | 1618 | 282  | 30 | 32.59 | 3.04  | 49.42 |
| chr5 | 173165724 | 173166675 | 952  | 457  | 20 | 32.27 | 5.34  | 50.07 |
| chr5 | 173312498 | 173314021 | 1524 | 1121 | 35 | 31.61 | 4.63  | 49.94 |
| chr5 | 173331086 | 173331873 | 788  | 354  | 21 | 42.12 | 4.89  | 46.86 |
| chr5 | 173377472 | 173378382 | 911  | 634  | 20 | 34.53 | 6.16  | 47.68 |
| chr5 | 173472189 | 173473380 | 1192 | 767  | 30 | 56.97 | 6.98  | 52.85 |
| chr5 | 173540315 | 173541405 | 1091 | 606  | 25 | 41.08 | 4.93  | 46.43 |
| chr5 | 173875952 | 173877540 | 1589 | 244  | 33 | 42.77 | 5.34  | 47.54 |
| chr5 | 173902519 | 173903697 | 1179 | 505  | 28 | 48.76 | 5.34  | 50.63 |
| chr5 | 175577588 | 175578302 | 715  | 428  | 19 | 42.8  | 5.34  | 47.43 |
| chr5 | 176351857 | 176352996 | 1140 | 660  | 25 | 38.35 | 4.93  | 46.33 |
| chr5 | 176465876 | 176466709 | 834  | 610  | 19 | 34.75 | 4.93  | 47.59 |
| chr5 | 176549455 | 176550317 | 863  | 401  | 20 | 36.98 | 5.3   | 46.95 |
| chr5 | 176636920 | 176638186 | 1267 | 793  | 29 | 30.23 | 4.44  | 51.73 |
| chr5 | 176670228 | 176671046 | 819  | 373  | 21 | 30.18 | 4.4   | 51.66 |
| chr5 | 176713863 | 176714900 | 1038 | 534  | 27 | 34.67 | 4.98  | 47.76 |
| chr5 | 177878255 | 177879149 | 895  | 242  | 19 | 31.27 | 4.11  | 50.46 |
| chr5 | 178431700 | 178432956 | 1257 | 503  | 27 | 40.15 | 6.57  | 46.72 |
| chr5 | 178439951 | 178441095 | 1145 | 469  | 24 | 34.15 | 7.8   | 48    |
| chr5 | 179049532 | 179052070 | 2539 | 760  | 71 | 59.24 | 4.38  | 53.9  |
| chr5 | 179124487 | 179126725 | 2239 | 789  | 44 | 45.24 | 6.85  | 49.22 |
| chr5 | 179237639 | 179238543 | 905  | 349  | 19 | 30.73 | 5.75  | 50.98 |
| chr5 | 179380963 | 179381814 | 852  | 357  | 23 | 47.47 | 5.75  | 48.55 |
| chr5 | 179417658 | 179419058 | 1401 | 1027 | 30 | 41.41 | 4.33  | 46.98 |
| chr5 | 179438235 | 179439047 | 813  | 230  | 20 | 38.3  | 5.51  | 46.42 |
| chr5 | 180157367 | 180158338 | 972  | 271  | 20 | 31.22 | 5.75  | 50.59 |
| chr5 | 180570693 | 180571518 | 826  | 428  | 21 | 44.48 | 7.39  | 48.48 |
| chr6 | 354180    | 355195    | 1016 | 656  | 21 | 32.51 | 6.52  | 49.39 |
| chr6 | 395592    | 396216    | 625  | 341  | 19 | 50.29 | 6.16  | 51.58 |
| chr6 | 468316    | 469843    | 1528 | 789  | 50 | 123   | 16.02 | 22.22 |
| chr6 | 478419    | 479360    | 942  | 412  | 23 | 38.2  | 5.45  | 46.4  |
| chr6 | 584819    | 585841    | 1023 | 747  | 23 | 36.57 | 5.75  | 46.9  |
| chr6 | 1918952   | 1919706   | 755  | 288  | 17 | 30.77 | 4.52  | 50.95 |
| chr6 | 2513205   | 2514045   | 841  | 510  | 19 | 34.33 | 4.52  | 47.74 |
| chr6 | 2703419   | 2704555   | 1137 | 402  | 27 | 31.64 | 5.52  | 49.88 |
| chr6 | 2771292   | 2772552   | 1261 | 482  | 29 | 31.68 | 3.88  | 49.83 |
| chr6 | 2833970   | 2834954   | 985  | 391  | 22 | 32.29 | 5.12  | 50.09 |
| chr6 | 2924639   | 2925513   | 875  | 629  | 19 | 32.37 | 4.93  | 49.85 |
| chr6 | 3334272   | 3335083   | 812  | 539  | 19 | 36.1  | 4.93  | 46.97 |
| chr6 | 3748244   | 3749611   | 1368 | 670  | 30 | 33.48 | 6.16  | 48.64 |
| chr6 | 3956325   | 3957480   | 1156 | 667  | 25 | 37.5  | 5.75  | 45.98 |
| chr6 | 4009781   | 4010952   | 1172 | 754  | 27 | 39.73 | 4.95  | 46.56 |

|      |          |          |      |      |    |       |      |       |
|------|----------|----------|------|------|----|-------|------|-------|
| chr6 | 5547794  | 5548505  | 712  | 357  | 17 | 33.42 | 5.34 | 48.71 |
| chr6 | 5739299  | 5740658  | 1360 | 265  | 30 | 46.7  | 4.93 | 47.44 |
| chr6 | 6484241  | 6485226  | 986  | 418  | 20 | 30.51 | 5.75 | 51.28 |
| chr6 | 6531483  | 6532090  | 608  | 334  | 15 | 31    | 4.93 | 50.54 |
| chr6 | 6964794  | 6965709  | 916  | 631  | 21 | 38.54 | 4.52 | 46.22 |
| chr6 | 7398496  | 7399170  | 675  | 395  | 17 | 30.42 | 4.74 | 51.33 |
| chr6 | 7516726  | 7517908  | 1183 | 577  | 33 | 37.66 | 4.28 | 46.36 |
| chr6 | 8315813  | 8316907  | 1095 | 462  | 24 | 36.73 | 5.75 | 47.01 |
| chr6 | 8476757  | 8477656  | 900  | 415  | 21 | 33.53 | 4.42 | 48.68 |
| chr6 | 8514106  | 8515582  | 1477 | 632  | 35 | 34.47 | 4.05 | 47.76 |
| chr6 | 8529007  | 8530074  | 1068 | 368  | 25 | 37.67 | 6.09 | 46.36 |
| chr6 | 8757134  | 8758041  | 908  | 244  | 19 | 30.57 | 4.52 | 51.17 |
| chr6 | 8821019  | 8821981  | 963  | 622  | 20 | 31.69 | 5.75 | 49.8  |
| chr6 | 8981509  | 8982792  | 1284 | 550  | 29 | 46.83 | 6.57 | 47.25 |
| chr6 | 9476846  | 9477953  | 1108 | 511  | 25 | 40.11 | 7.39 | 46.61 |
| chr6 | 10053632 | 10054463 | 832  | 290  | 18 | 30.6  | 5.34 | 51.25 |
| chr6 | 10232726 | 10233523 | 798  | 512  | 20 | 41.66 | 4.93 | 47.21 |
| chr6 | 10473059 | 10474262 | 1204 | 527  | 24 | 31.34 | 5.75 | 50.18 |
| chr6 | 10479903 | 10480841 | 939  | 659  | 21 | 33.02 | 4.57 | 49.13 |
| chr6 | 10618791 | 10619705 | 915  | 332  | 19 | 30.21 | 4.11 | 51.69 |
| chr6 | 10627632 | 10628547 | 916  | 418  | 21 | 34.34 | 5.33 | 47.85 |
| chr6 | 10644992 | 10646260 | 1269 | 672  | 26 | 35.69 | 5.75 | 47.21 |
| chr6 | 10800840 | 10802347 | 1508 | 703  | 39 | 64.95 | 7.99 | 54.4  |
| chr6 | 10817121 | 10818467 | 1347 | 650  | 29 | 31.2  | 4.45 | 50.54 |
| chr6 | 10868744 | 10869769 | 1026 | 358  | 25 | 45.01 | 6.16 | 49.03 |
| chr6 | 12171914 | 12172742 | 829  | 373  | 18 | 30.43 | 5.3  | 51.28 |
| chr6 | 12317185 | 12318171 | 987  | 730  | 25 | 47.55 | 6.98 | 48.9  |
| chr6 | 12365554 | 12366654 | 1101 | 488  | 25 | 40.51 | 4.93 | 46.98 |
| chr6 | 12477133 | 12478536 | 1404 | 283  | 30 | 44.34 | 4.93 | 48.4  |
| chr6 | 12588814 | 12590676 | 1863 | 592  | 35 | 37.79 | 4.93 | 46.68 |
| chr6 | 13167269 | 13168175 | 907  | 616  | 20 | 34.75 | 4.11 | 47.62 |
| chr6 | 13650056 | 13651027 | 972  | 271  | 25 | 34.65 | 6.92 | 47.66 |
| chr6 | 13814203 | 13816327 | 2125 | 1484 | 59 | 30.28 | 4.49 | 51.66 |
| chr6 | 13915581 | 13916578 | 998  | 621  | 22 | 33.85 | 6.16 | 48.73 |
| chr6 | 14264560 | 14265794 | 1235 | 623  | 28 | 45.44 | 5.75 | 49.63 |
| chr6 | 15118098 | 15118843 | 746  | 249  | 17 | 31.31 | 4.93 | 50.36 |
| chr6 | 15584919 | 15585751 | 833  | 326  | 19 | 34.81 | 5.75 | 47.51 |
| chr6 | 15720191 | 15721180 | 990  | 588  | 21 | 32.03 | 5.12 | 49.77 |
| chr6 | 15831246 | 15832362 | 1117 | 620  | 24 | 35.57 | 5.34 | 47.21 |
| chr6 | 16547674 | 16548580 | 907  | 626  | 20 | 34.75 | 4.93 | 47.62 |
| chr6 | 16831869 | 16832485 | 617  | 337  | 15 | 30.4  | 5.75 | 51.47 |
| chr6 | 17980241 | 17981062 | 822  | 544  | 20 | 40.02 | 6.16 | 46.54 |
| chr6 | 18453992 | 18455180 | 1189 | 642  | 30 | 57.17 | 6.16 | 53.28 |
| chr6 | 18680231 | 18681097 | 867  | 253  | 20 | 37.13 | 4.52 | 46.94 |
| chr6 | 18820470 | 18821335 | 866  | 578  | 19 | 32.88 | 5.34 | 49.29 |
| chr6 | 19839901 | 19840792 | 892  | 481  | 19 | 31.43 | 4.93 | 50    |
| chr6 | 20029198 | 20030386 | 1189 | 376  | 25 | 35.81 | 5.34 | 47.14 |
| chr6 | 20390044 | 20390972 | 929  | 351  | 23 | 37.71 | 7.99 | 46.52 |
| chr6 | 20579873 | 20580674 | 802  | 387  | 24 | 45.24 | 5.88 | 49.25 |
| chr6 | 20805250 | 20806747 | 1498 | 942  | 30 | 32.29 | 3.68 | 50.08 |
| chr6 | 21014087 | 21014993 | 907  | 283  | 22 | 36.72 | 6.69 | 47.02 |
| chr6 | 21016755 | 21017902 | 1148 | 544  | 24 | 33.58 | 5.71 | 48.67 |

|      |          |          |      |      |     |       |      |       |
|------|----------|----------|------|------|-----|-------|------|-------|
| chr6 | 21144381 | 21145122 | 742  | 270  | 18  | 32.38 | 4.19 | 49.75 |
| chr6 | 21526385 | 21526988 | 604  | 280  | 15  | 31.27 | 4.93 | 50.46 |
| chr6 | 23945420 | 23946255 | 836  | 487  | 18  | 30.38 | 4.93 | 51.65 |
| chr6 | 23972924 | 23974869 | 1946 | 1361 | 36  | 37.76 | 5.34 | 46.62 |
| chr6 | 24252149 | 24252882 | 734  | 490  | 17  | 32.04 | 5.34 | 49.74 |
| chr6 | 24946603 | 24947882 | 1280 | 801  | 29  | 40.8  | 6.02 | 46.35 |
| chr6 | 24998535 | 24999528 | 994  | 618  | 22  | 31.82 | 5.12 | 49.82 |
| chr6 | 25198574 | 25199662 | 1089 | 449  | 23  | 33.09 | 4.93 | 49.15 |
| chr6 | 25685680 | 25686841 | 1162 | 504  | 25  | 37.19 | 6.57 | 46.86 |
| chr6 | 25878954 | 25879707 | 754  | 274  | 18  | 31.63 | 4.57 | 49.89 |
| chr6 | 26049198 | 26050859 | 1662 | 1046 | 37  | 31.27 | 3.7  | 50.45 |
| chr6 | 26060075 | 26061805 | 1731 | 255  | 40  | 52.45 | 5.16 | 50.54 |
| chr6 | 26205700 | 26206863 | 1164 | 708  | 29  | 40.85 | 3.77 | 46.33 |
| chr6 | 26292922 | 26293718 | 797  | 261  | 18  | 30.1  | 4.28 | 51.55 |
| chr6 | 26760794 | 26761734 | 941  | 272  | 23  | 41.42 | 5.34 | 47.09 |
| chr6 | 26799238 | 26799856 | 619  | 287  | 15  | 30.27 | 5.75 | 51.69 |
| chr6 | 26922887 | 26924702 | 1816 | 285  | 41  | 52.67 | 4.84 | 50.56 |
| chr6 | 27078655 | 27079246 | 592  | 230  | 15  | 32.09 | 5.75 | 49.72 |
| chr6 | 27804918 | 27806366 | 1449 | 606  | 42  | 31.76 | 3.61 | 49.86 |
| chr6 | 28137306 | 28138109 | 804  | 290  | 20  | 41.24 | 4.93 | 46.72 |
| chr6 | 28154029 | 28155120 | 1092 | 600  | 23  | 32.94 | 5.34 | 49.38 |
| chr6 | 28332986 | 28334088 | 1103 | 540  | 24  | 36.31 | 4.52 | 46.95 |
| chr6 | 28359048 | 28360130 | 1083 | 640  | 24  | 32.98 | 5.71 | 49.25 |
| chr6 | 28569704 | 28570611 | 908  | 657  | 19  | 30.57 | 4.11 | 51.17 |
| chr6 | 28671567 | 28672388 | 822  | 545  | 21  | 34.5  | 6.16 | 47.66 |
| chr6 | 28726215 | 28727084 | 870  | 287  | 19  | 31.71 | 4.43 | 49.75 |
| chr6 | 28889795 | 28891850 | 2056 | 1394 | 41  | 32.71 | 4.69 | 49.38 |
| chr6 | 28919592 | 28920803 | 1212 | 623  | 28  | 42.98 | 6.62 | 47.39 |
| chr6 | 29015003 | 29016554 | 1552 | 1173 | 36  | 48.97 | 5.27 | 50.49 |
| chr6 | 29084191 | 29085105 | 915  | 640  | 20  | 34.3  | 4.93 | 47.81 |
| chr6 | 29118845 | 29119885 | 1041 | 507  | 28  | 58.09 | 6.98 | 53.61 |
| chr6 | 29309333 | 29310350 | 1018 | 284  | 21  | 32.8  | 5.34 | 49.43 |
| chr6 | 29856660 | 29858349 | 1690 | 843  | 47  | 36.5  | 3.18 | 47.04 |
| chr6 | 29989850 | 29991349 | 1500 | 562  | 32  | 38.93 | 5.16 | 46.27 |
| chr6 | 30243506 | 30245162 | 1657 | 623  | 34  | 40.04 | 4.52 | 46.58 |
| chr6 | 30671752 | 30673913 | 2162 | 677  | 76  | 35.29 | 3.7  | 47.41 |
| chr6 | 30685124 | 30686740 | 1617 | 589  | 43  | 34.18 | 3.89 | 48.01 |
| chr6 | 31055454 | 31056371 | 918  | 485  | 21  | 33.64 | 4.52 | 48.79 |
| chr6 | 31235524 | 31240345 | 4822 | 693  | 151 | 32.57 | 3.08 | 49.31 |
| chr6 | 31320815 | 31326114 | 5300 | 999  | 184 | 73.07 | 4.24 | 56.82 |
| chr6 | 31399909 | 31400803 | 895  | 432  | 20  | 35.45 | 5.75 | 47.41 |
| chr6 | 31428018 | 31429119 | 1102 | 823  | 27  | 45.38 | 5.06 | 49.56 |
| chr6 | 32596215 | 32597595 | 1381 | 559  | 35  | 30.76 | 4.7  | 50.95 |
| chr6 | 33167100 | 33169234 | 2135 | 1704 | 52  | 60.2  | 5.66 | 55.2  |
| chr6 | 33175446 | 33177471 | 2026 | 473  | 47  | 39.04 | 5.73 | 46.26 |
| chr6 | 33286685 | 33289533 | 2849 | 704  | 72  | 32.39 | 4.34 | 49.75 |
| chr6 | 33311911 | 33312632 | 722  | 462  | 17  | 32.78 | 5.34 | 49.39 |
| chr6 | 34494334 | 34495662 | 1329 | 1069 | 31  | 32.34 | 4.36 | 49.97 |
| chr6 | 34928690 | 34929708 | 1019 | 255  | 21  | 32.74 | 4.93 | 49.36 |
| chr6 | 34932431 | 34933042 | 612  | 352  | 16  | 35.54 | 5.34 | 47.2  |
| chr6 | 34964152 | 34965360 | 1209 | 560  | 24  | 31.11 | 4.52 | 50.71 |
| chr6 | 34973435 | 34974426 | 992  | 285  | 20  | 30.21 | 4.52 | 51.73 |

|      |          |          |      |      |    |       |      |       |
|------|----------|----------|------|------|----|-------|------|-------|
| chr6 | 35402982 | 35403720 | 739  | 270  | 17 | 31.73 | 4.93 | 49.74 |
| chr6 | 36646055 | 36647363 | 1309 | 781  | 30 | 36.9  | 4.48 | 46.71 |
| chr6 | 36679247 | 36680171 | 925  | 340  | 22 | 37.99 | 4.52 | 46.41 |
| chr6 | 36953117 | 36954298 | 1182 | 654  | 29 | 51.57 | 6.04 | 51.65 |
| chr6 | 37239832 | 37240764 | 933  | 508  | 21 | 33.96 | 5.77 | 48.61 |
| chr6 | 37937017 | 37937829 | 813  | 523  | 19 | 36.04 | 4.11 | 46.87 |
| chr6 | 39081360 | 39083591 | 2232 | 1453 | 43 | 47.5  | 6.84 | 48.64 |
| chr6 | 39805570 | 39806271 | 702  | 389  | 17 | 32.93 | 6.01 | 49.36 |
| chr6 | 40568601 | 40569595 | 995  | 536  | 22 | 34.01 | 4.11 | 48.54 |
| chr6 | 41053725 | 41054491 | 767  | 277  | 18 | 34.45 | 4.93 | 47.77 |
| chr6 | 42244171 | 42244798 | 628  | 356  | 16 | 31.53 | 5.77 | 49.93 |
| chr6 | 43484206 | 43485949 | 1744 | 765  | 46 | 31.19 | 3.91 | 50.52 |
| chr6 | 44007242 | 44008097 | 856  | 256  | 23 | 47.18 | 8.22 | 47.74 |
| chr6 | 44374469 | 44375987 | 1519 | 883  | 34 | 36.13 | 3.42 | 46.97 |
| chr6 | 44418183 | 44419581 | 1399 | 714  | 31 | 35.3  | 5.82 | 47.42 |
| chr6 | 44898272 | 44899738 | 1467 | 491  | 30 | 41.16 | 3.7  | 46.47 |
| chr6 | 45075770 | 45076742 | 973  | 711  | 20 | 31.17 | 4.11 | 50.55 |
| chr6 | 45212323 | 45213126 | 804  | 555  | 18 | 32.2  | 4.52 | 49.96 |
| chr6 | 45373572 | 45374501 | 930  | 330  | 20 | 33.46 | 5.34 | 48.63 |
| chr6 | 45380154 | 45380932 | 779  | 284  | 18 | 30.11 | 4.57 | 51.64 |
| chr6 | 45383635 | 45384683 | 1049 | 765  | 22 | 31.23 | 4.52 | 50.5  |
| chr6 | 46117136 | 46118351 | 1216 | 576  | 29 | 50.88 | 6.16 | 51.55 |
| chr6 | 46313010 | 46314087 | 1078 | 276  | 25 | 41.84 | 6.16 | 47.01 |
| chr6 | 46462698 | 46463655 | 958  | 332  | 20 | 31.95 | 4.93 | 49.8  |
| chr6 | 46668592 | 46669456 | 865  | 513  | 19 | 32.93 | 4.52 | 49.39 |
| chr6 | 47518055 | 47518981 | 927  | 391  | 24 | 41.47 | 6.77 | 47.06 |
| chr6 | 47684164 | 47684984 | 821  | 249  | 18 | 31.22 | 4.93 | 50.51 |
| chr6 | 48331583 | 48333154 | 1572 | 320  | 32 | 43.59 | 4.11 | 47.64 |
| chr6 | 48476832 | 48477812 | 981  | 742  | 20 | 30.76 | 4.11 | 50.95 |
| chr6 | 49031634 | 49032511 | 878  | 588  | 20 | 36.46 | 4.93 | 47.12 |
| chr6 | 49157813 | 49158848 | 1036 | 569  | 22 | 31.88 | 5.34 | 49.76 |
| chr6 | 49446126 | 49447594 | 1469 | 887  | 30 | 31.97 | 4.67 | 49.83 |
| chr6 | 50068949 | 50069935 | 987  | 432  | 21 | 34.44 | 4.52 | 47.76 |
| chr6 | 50911005 | 50911745 | 741  | 282  | 19 | 40.88 | 5.75 | 46.38 |
| chr6 | 51899195 | 51900108 | 914  | 555  | 19 | 30.26 | 4.11 | 51.67 |
| chr6 | 52262905 | 52263977 | 1073 | 557  | 23 | 33.9  | 5.34 | 48.62 |
| chr6 | 52718609 | 52719533 | 925  | 267  | 22 | 37.99 | 6.16 | 46.41 |
| chr6 | 52859743 | 52861281 | 1539 | 805  | 95 | 85.58 | 9.3  | 52.63 |
| chr6 | 53299237 | 53300134 | 898  | 509  | 20 | 34.89 | 4.89 | 47.68 |
| chr6 | 53388170 | 53389484 | 1315 | 774  | 26 | 33.53 | 6.57 | 48.68 |
| chr6 | 53620522 | 53621500 | 979  | 249  | 21 | 34.88 | 4.11 | 47.64 |
| chr6 | 54462449 | 54463547 | 1099 | 815  | 27 | 49.35 | 4.93 | 51.31 |
| chr6 | 54840537 | 54841528 | 992  | 603  | 25 | 35.77 | 4.79 | 47.1  |
| chr6 | 54971629 | 54972659 | 1031 | 756  | 22 | 32.13 | 5.34 | 49.78 |
| chr6 | 55674341 | 55675327 | 987  | 369  | 23 | 38.62 | 5.75 | 46.1  |
| chr6 | 55723234 | 55724165 | 932  | 232  | 20 | 33.35 | 5.34 | 48.67 |
| chr6 | 55724349 | 55725384 | 1036 | 692  | 22 | 31.88 | 5.34 | 49.76 |
| chr6 | 55961128 | 55962036 | 909  | 503  | 19 | 30.52 | 5.34 | 51.32 |
| chr6 | 56436877 | 56437739 | 863  | 597  | 21 | 40.15 | 4.38 | 46.69 |
| chr6 | 56456713 | 56457850 | 1138 | 773  | 25 | 33.24 | 4.89 | 49    |
| chr6 | 56612763 | 56613689 | 927  | 428  | 20 | 33.62 | 5.34 | 48.71 |
| chr6 | 56966138 | 56967626 | 1489 | 1020 | 38 | 48.54 | 4.28 | 49.69 |



|      |          |          |      |      |     |       |      |       |
|------|----------|----------|------|------|-----|-------|------|-------|
| chr6 | 57018532 | 57019702 | 1171 | 505  | 27  | 36.97 | 5.1  | 46.99 |
| chr6 | 57033927 | 57035730 | 1804 | 1338 | 41  | 30.37 | 3.71 | 51.62 |
| chr6 | 57129675 | 57130460 | 786  | 417  | 18  | 31.81 | 4.38 | 49.84 |
| chr6 | 57205272 | 57207415 | 2144 | 1422 | 54  | 30.52 | 3.92 | 51.3  |
| chr6 | 57362723 | 57365585 | 2863 | 510  | 71  | 32.44 | 3.15 | 49.55 |
| chr6 | 57563546 | 57567051 | 3506 | 2461 | 102 | 47.32 | 3.4  | 48.27 |
| chr6 | 57654460 | 57655395 | 936  | 321  | 22  | 37.33 | 5.34 | 46.7  |
| chr6 | 57846525 | 57847473 | 949  | 288  | 20  | 32.43 | 5.34 | 49.57 |
| chr6 | 57961146 | 57962097 | 952  | 677  | 20  | 32.27 | 4.93 | 50.07 |
| chr6 | 62326020 | 62326964 | 945  | 656  | 22  | 36.81 | 5.34 | 46.82 |
| chr6 | 62528970 | 62530884 | 1915 | 498  | 48  | 67.92 | 6.56 | 54.68 |
| chr6 | 63183705 | 63184755 | 1051 | 492  | 21  | 31.13 | 5.34 | 50.63 |
| chr6 | 63981963 | 63983670 | 1708 | 1046 | 38  | 56.11 | 6.98 | 53.69 |
| chr6 | 64084506 | 64085515 | 1010 | 494  | 21  | 33.21 | 5.34 | 49.14 |
| chr6 | 64176689 | 64177527 | 839  | 588  | 19  | 34.45 | 4.52 | 47.73 |
| chr6 | 64511457 | 64512679 | 1223 | 583  | 27  | 41.97 | 5.34 | 47.11 |
| chr6 | 64767345 | 64768183 | 839  | 365  | 20  | 38.9  | 5.34 | 46.29 |
| chr6 | 64887651 | 64888439 | 789  | 263  | 18  | 33.09 | 4.11 | 49.16 |
| chr6 | 65134403 | 65135354 | 952  | 478  | 21  | 32.3  | 6.47 | 50.08 |
| chr6 | 65150395 | 65151291 | 897  | 476  | 21  | 39.3  | 5.71 | 46.52 |
| chr6 | 65500497 | 65501275 | 779  | 323  | 18  | 33.7  | 6.16 | 48.57 |
| chr6 | 66038177 | 66038865 | 689  | 403  | 16  | 30.36 | 6.16 | 51.66 |
| chr6 | 66083031 | 66083934 | 904  | 576  | 19  | 30.79 | 5.34 | 50.91 |
| chr6 | 66213018 | 66214120 | 1103 | 731  | 24  | 36.31 | 4.93 | 46.95 |
| chr6 | 66271130 | 66271721 | 592  | 363  | 15  | 32.09 | 4.93 | 49.72 |
| chr6 | 66466093 | 66466864 | 772  | 494  | 18  | 30.53 | 4.19 | 51.24 |
| chr6 | 66619473 | 66620336 | 864  | 284  | 19  | 32.99 | 4.93 | 49.23 |
| chr6 | 66884296 | 66885207 | 912  | 620  | 20  | 34.47 | 4.93 | 47.74 |
| chr6 | 67096735 | 67097779 | 1045 | 578  | 25  | 41.84 | 5.18 | 47.1  |
| chr6 | 67345658 | 67347528 | 1871 | 1383 | 35  | 35.8  | 4.62 | 47.1  |
| chr6 | 67357942 | 67359159 | 1218 | 408  | 26  | 33.34 | 6.07 | 48.7  |
| chr6 | 67598217 | 67599287 | 1071 | 442  | 21  | 30.16 | 4.52 | 51.62 |
| chr6 | 67602175 | 67603309 | 1135 | 557  | 23  | 30.86 | 5.75 | 50.88 |
| chr6 | 67640769 | 67642119 | 1351 | 723  | 29  | 43.16 | 5.34 | 47.39 |
| chr6 | 67680741 | 67681573 | 833  | 436  | 19  | 34.81 | 5.34 | 47.51 |
| chr6 | 67779967 | 67781283 | 1317 | 486  | 28  | 36.63 | 4.62 | 47    |
| chr6 | 67831145 | 67831794 | 650  | 303  | 19  | 42.04 | 5.89 | 47.02 |
| chr6 | 67899668 | 67900565 | 898  | 405  | 21  | 39.65 | 5.34 | 46.42 |
| chr6 | 68033205 | 68034879 | 1675 | 751  | 41  | 70.03 | 4.89 | 52.94 |
| chr6 | 68179522 | 68180393 | 872  | 277  | 21  | 41.33 | 4.93 | 46.82 |
| chr6 | 68304912 | 68305823 | 912  | 200  | 19  | 30.36 | 5.75 | 51.57 |
| chr6 | 68305906 | 68307371 | 1466 | 1197 | 30  | 41.21 | 4.93 | 46.74 |
| chr6 | 68446548 | 68448129 | 1582 | 459  | 36  | 49.72 | 5.42 | 51.72 |
| chr6 | 68659435 | 68660296 | 862  | 570  | 19  | 31.03 | 5.12 | 50.49 |
| chr6 | 69257278 | 69258274 | 997  | 322  | 22  | 33.9  | 5.75 | 48.58 |
| chr6 | 69582441 | 69583617 | 1177 | 554  | 26  | 40.41 | 6.16 | 46.79 |
| chr6 | 69808928 | 69810027 | 1100 | 719  | 24  | 32.11 | 5.71 | 49.72 |
| chr6 | 70466657 | 70467858 | 1202 | 740  | 27  | 43.14 | 6.16 | 47.34 |
| chr6 | 70760598 | 70761924 | 1327 | 1061 | 30  | 42.08 | 4.14 | 46.97 |
| chr6 | 71133881 | 71135487 | 1607 | 1317 | 36  | 44.26 | 5.89 | 48.19 |
| chr6 | 71415613 | 71417049 | 1437 | 860  | 32  | 30.26 | 4.36 | 51.69 |
| chr6 | 71566397 | 71567678 | 1282 | 282  | 29  | 44.86 | 4.39 | 48.91 |

|      |          |          |      |     |    |       |      |       |
|------|----------|----------|------|-----|----|-------|------|-------|
| chr6 | 71711223 | 71712083 | 861  | 586 | 19 | 33.16 | 4.93 | 49.11 |
| chr6 | 71716633 | 71717323 | 691  | 277 | 16 | 30.24 | 5.34 | 51.75 |
| chr6 | 71774385 | 71775072 | 688  | 289 | 19 | 44.9  | 6.98 | 48.87 |
| chr6 | 71854737 | 71855583 | 847  | 591 | 19 | 30.24 | 4.19 | 51.74 |
| chr6 | 71872124 | 71872815 | 692  | 245 | 16 | 30.18 | 6.16 | 51.67 |
| chr6 | 71900232 | 71901748 | 1517 | 232 | 35 | 50.79 | 4.72 | 51.94 |
| chr6 | 71915511 | 71916614 | 1104 | 375 | 27 | 49.03 | 5.34 | 50.6  |
| chr6 | 72201917 | 72202672 | 756  | 472 | 20 | 44.7  | 6.16 | 48.8  |
| chr6 | 72435939 | 72437180 | 1242 | 587 | 33 | 47.77 | 4.79 | 49.29 |
| chr6 | 72558451 | 72559615 | 1165 | 557 | 25 | 37.03 | 4.52 | 46.99 |
| chr6 | 72820098 | 72820993 | 896  | 274 | 19 | 31.21 | 4.11 | 50.51 |
| chr6 | 72925964 | 72926537 | 574  | 287 | 16 | 35.22 | 6.23 | 47.18 |
| chr6 | 72932069 | 72932941 | 873  | 585 | 20 | 36.77 | 4.52 | 46.92 |
| chr6 | 73006512 | 73008565 | 2054 | 558 | 44 | 50.12 | 4.95 | 51.87 |
| chr6 | 73009730 | 73011712 | 1983 | 649 | 38 | 38.08 | 5.58 | 46.43 |
| chr6 | 74082417 | 74083407 | 991  | 455 | 34 | 42.92 | 6.36 | 47.41 |
| chr6 | 74242371 | 74243115 | 745  | 449 | 17 | 31.37 | 6.16 | 50.22 |
| chr6 | 74354293 | 74355342 | 1050 | 334 | 24 | 36.7  | 5.51 | 46.98 |
| chr6 | 74531715 | 74532498 | 784  | 503 | 21 | 35.97 | 5.03 | 47.08 |
| chr6 | 74988023 | 74988933 | 911  | 529 | 19 | 30.42 | 4.52 | 51.31 |
| chr6 | 75007419 | 75008252 | 834  | 542 | 18 | 30.49 | 4.52 | 51.26 |
| chr6 | 75222962 | 75223831 | 870  | 252 | 20 | 36.95 | 6.16 | 46.89 |
| chr6 | 75337846 | 75338838 | 993  | 369 | 20 | 30.16 | 4.52 | 51.68 |
| chr6 | 75906309 | 75907026 | 718  | 351 | 18 | 37.69 | 6.16 | 46.44 |
| chr6 | 76074358 | 76075205 | 848  | 287 | 22 | 42.94 | 6.98 | 47.42 |
| chr6 | 76209248 | 76210182 | 935  | 463 | 20 | 33.18 | 5.34 | 49.11 |
| chr6 | 76398118 | 76398994 | 877  | 442 | 19 | 32.26 | 4.52 | 49.99 |
| chr6 | 76408531 | 76409901 | 1371 | 802 | 29 | 42.12 | 6.57 | 46.92 |
| chr6 | 76811860 | 76812746 | 887  | 580 | 20 | 35.92 | 5.75 | 47.03 |
| chr6 | 76996064 | 76997060 | 997  | 651 | 24 | 42.37 | 5.34 | 47.05 |
| chr6 | 77060182 | 77061361 | 1180 | 635 | 24 | 32.46 | 6.16 | 49.44 |
| chr6 | 77529593 | 77530507 | 915  | 230 | 19 | 30.21 | 4.52 | 51.69 |
| chr6 | 77852078 | 77853020 | 943  | 488 | 20 | 32.75 | 5.34 | 49.37 |
| chr6 | 78312651 | 78313523 | 873  | 363 | 19 | 32.48 | 4.93 | 49.44 |
| chr6 | 78681513 | 78682395 | 883  | 518 | 19 | 31.92 | 4.93 | 49.72 |
| chr6 | 78893135 | 78893980 | 846  | 252 | 21 | 43.08 | 6.98 | 47.19 |
| chr6 | 78905444 | 78906198 | 755  | 289 | 19 | 35.92 | 4.95 | 47.09 |
| chr6 | 78906279 | 78907367 | 1089 | 612 | 24 | 32.67 | 5.33 | 49.44 |
| chr6 | 79334437 | 79335372 | 936  | 647 | 22 | 37.33 | 6.16 | 46.7  |
| chr6 | 79735213 | 79736407 | 1195 | 789 | 28 | 39.45 | 6.56 | 47.12 |
| chr6 | 79785763 | 79787192 | 1430 | 921 | 37 | 30.72 | 3.42 | 51.03 |
| chr6 | 79922896 | 79924033 | 1138 | 401 | 25 | 30.79 | 3.97 | 51.01 |
| chr6 | 80010619 | 80011368 | 750  | 496 | 17 | 31.07 | 4.93 | 50.77 |
| chr6 | 80082515 | 80083396 | 882  | 608 | 21 | 40.68 | 4.52 | 46.47 |
| chr6 | 80166331 | 80167207 | 877  | 605 | 21 | 36.71 | 4.57 | 46.96 |
| chr6 | 80175756 | 80176616 | 861  | 499 | 21 | 42.06 | 4.93 | 46.99 |
| chr6 | 80258199 | 80259178 | 980  | 691 | 20 | 30.81 | 4.52 | 50.95 |
| chr6 | 80717051 | 80718403 | 1353 | 834 | 37 | 42.39 | 4.93 | 47.07 |
| chr6 | 80942367 | 80943156 | 790  | 541 | 19 | 33.64 | 4.95 | 48.8  |
| chr6 | 81011430 | 81012749 | 1320 | 712 | 28 | 40.82 | 6.57 | 46.34 |
| chr6 | 81047332 | 81048771 | 1440 | 439 | 31 | 46.42 | 4.11 | 48.47 |
| chr6 | 81322704 | 81323614 | 911  | 455 | 20 | 34.53 | 4.93 | 47.68 |

|      |          |          |      |      |    |       |      |       |
|------|----------|----------|------|------|----|-------|------|-------|
| chr6 | 81753942 | 81755081 | 1140 | 480  | 25 | 33.78 | 6.09 | 48.7  |
| chr6 | 82182197 | 82183001 | 805  | 427  | 20 | 41.17 | 6.98 | 46.48 |
| chr6 | 82940647 | 82941469 | 823  | 384  | 20 | 34.69 | 5.21 | 47.8  |
| chr6 | 83357395 | 83358465 | 1071 | 492  | 21 | 30.16 | 4.52 | 51.62 |
| chr6 | 83403008 | 83404070 | 1063 | 468  | 22 | 30.55 | 6.57 | 51.18 |
| chr6 | 83785325 | 83787149 | 1825 | 1297 | 39 | 38.87 | 5.53 | 46.22 |
| chr6 | 83954755 | 83956396 | 1642 | 1368 | 34 | 37.05 | 4.12 | 47.05 |
| chr6 | 84465615 | 84466812 | 1198 | 486  | 29 | 52.01 | 4.93 | 50.97 |
| chr6 | 84509493 | 84510565 | 1073 | 440  | 28 | 50.06 | 5.71 | 51.66 |
| chr6 | 84555854 | 84557393 | 1540 | 880  | 34 | 40.49 | 4.79 | 46.93 |
| chr6 | 84601471 | 84602296 | 826  | 586  | 18 | 30.94 | 4.11 | 50.56 |
| chr6 | 84612924 | 84614266 | 1343 | 690  | 31 | 42.64 | 5.1  | 47.39 |
| chr6 | 84787235 | 84788434 | 1200 | 546  | 24 | 31.52 | 5.34 | 49.89 |
| chr6 | 84867213 | 84869044 | 1832 | 725  | 39 | 53.55 | 4.93 | 52.03 |
| chr6 | 84919199 | 84920257 | 1059 | 572  | 23 | 34.22 | 4.89 | 47.92 |
| chr6 | 84934628 | 84935986 | 1359 | 539  | 31 | 39.48 | 5.3  | 47.06 |
| chr6 | 84961458 | 84963146 | 1689 | 1086 | 35 | 43.88 | 4.83 | 47.88 |
| chr6 | 85347508 | 85348517 | 1010 | 443  | 22 | 33.21 | 6.98 | 49.14 |
| chr6 | 85655851 | 85656876 | 1026 | 285  | 26 | 43.65 | 6.02 | 47.97 |
| chr6 | 86416466 | 86418102 | 1637 | 519  | 39 | 43.98 | 4.62 | 47.89 |
| chr6 | 87035274 | 87036142 | 869  | 274  | 19 | 32.71 | 4.52 | 49.41 |
| chr6 | 87364987 | 87366372 | 1386 | 827  | 28 | 31.32 | 4.84 | 50.33 |
| chr6 | 87534064 | 87535054 | 991  | 537  | 20 | 30.26 | 4.93 | 51.67 |
| chr6 | 87614146 | 87615259 | 1114 | 528  | 26 | 32.59 | 4.79 | 49.3  |
| chr6 | 87941929 | 87943750 | 1822 | 1414 | 43 | 57.19 | 4.89 | 53.16 |
| chr6 | 87971765 | 87974173 | 2409 | 662  | 54 | 52.57 | 4.11 | 50.32 |
| chr6 | 87996531 | 87997465 | 935  | 445  | 20 | 33.18 | 5.34 | 49.11 |
| chr6 | 88034008 | 88034999 | 992  | 526  | 25 | 42.26 | 5.33 | 47.24 |
| chr6 | 88600120 | 88601119 | 1000 | 421  | 21 | 31.5  | 5.51 | 49.88 |
| chr6 | 89091024 | 89091775 | 752  | 464  | 17 | 30.95 | 4.52 | 50.53 |
| chr6 | 89254986 | 89255855 | 870  | 587  | 19 | 32.65 | 4.93 | 49.31 |
| chr6 | 89312696 | 89313807 | 1112 | 613  | 23 | 31.96 | 5.34 | 49.77 |
| chr6 | 89644517 | 89645597 | 1081 | 655  | 23 | 30.59 | 5.84 | 51.24 |
| chr6 | 90105109 | 90105976 | 868  | 622  | 21 | 41.59 | 4.52 | 47.18 |
| chr6 | 90317433 | 90318463 | 1031 | 437  | 22 | 32.13 | 7.8  | 49.78 |
| chr6 | 90729659 | 90730612 | 954  | 592  | 20 | 31.19 | 4.43 | 50.51 |
| chr6 | 90852132 | 90853249 | 1118 | 458  | 23 | 31.67 | 4.93 | 49.85 |
| chr6 | 91790746 | 91791445 | 700  | 268  | 17 | 34.2  | 5.75 | 47.93 |
| chr6 | 91900619 | 91901967 | 1349 | 603  | 30 | 47.32 | 5.34 | 48.18 |
| chr6 | 91972899 | 91973757 | 859  | 453  | 19 | 33.28 | 6.16 | 48.91 |
| chr6 | 92089297 | 92090736 | 1440 | 770  | 32 | 50.48 | 5.34 | 51.82 |
| chr6 | 92211427 | 92212626 | 1200 | 534  | 24 | 31.52 | 5.34 | 49.89 |
| chr6 | 92676008 | 92676893 | 886  | 408  | 20 | 35.98 | 5.75 | 47.04 |
| chr6 | 93403442 | 93404675 | 1234 | 616  | 26 | 36.95 | 6.12 | 46.93 |
| chr6 | 93856195 | 93856843 | 649  | 358  | 17 | 34.17 | 5.33 | 48.04 |
| chr6 | 94522539 | 94523535 | 997  | 620  | 21 | 33.9  | 4.93 | 48.58 |
| chr6 | 94682129 | 94683032 | 904  | 655  | 19 | 30.79 | 4.93 | 50.91 |
| chr6 | 94705303 | 94706131 | 829  | 547  | 18 | 30.77 | 4.93 | 50.95 |
| chr6 | 94772821 | 94775029 | 2209 | 1037 | 50 | 34.3  | 3.42 | 47.83 |
| chr6 | 95280498 | 95281382 | 885  | 619  | 24 | 45.04 | 6.09 | 49.13 |
| chr6 | 95340280 | 95341307 | 1028 | 512  | 21 | 32.28 | 4.52 | 50.03 |
| chr6 | 95370563 | 95371545 | 983  | 341  | 22 | 34.66 | 4.52 | 47.66 |

|      |           |           |      |      |    |       |      |       |
|------|-----------|-----------|------|------|----|-------|------|-------|
| chr6 | 95483290  | 95484463  | 1174 | 585  | 24 | 32.74 | 4.93 | 49.37 |
| chr6 | 95606139  | 95607411  | 1273 | 593  | 30 | 51.18 | 6.12 | 51.66 |
| chr6 | 96176926  | 96178202  | 1277 | 746  | 31 | 55.94 | 5.34 | 53.41 |
| chr6 | 96306174  | 96307318  | 1145 | 538  | 25 | 38.09 | 5.34 | 46.46 |
| chr6 | 96491895  | 96493179  | 1285 | 642  | 27 | 38.71 | 7.8  | 46.26 |
| chr6 | 96751748  | 96752596  | 849  | 258  | 19 | 33.86 | 4.93 | 48.66 |
| chr6 | 96837706  | 96838747  | 1042 | 246  | 23 | 35.53 | 4.52 | 47.2  |
| chr6 | 96933617  | 96934289  | 673  | 281  | 16 | 31.37 | 4.52 | 50.2  |
| chr6 | 97001236  | 97002387  | 1152 | 543  | 26 | 41.8  | 6.16 | 47.05 |
| chr6 | 97035768  | 97036567  | 800  | 521  | 18 | 32.44 | 5.75 | 49.55 |
| chr6 | 97452380  | 97453255  | 876  | 611  | 20 | 36.58 | 4.93 | 46.91 |
| chr6 | 97470851  | 97471854  | 1004 | 395  | 22 | 33.53 | 6.98 | 48.64 |
| chr6 | 97531266  | 97532164  | 899  | 260  | 22 | 35.35 | 4.57 | 47.46 |
| chr6 | 97598933  | 97599728  | 796  | 574  | 19 | 37.12 | 5.34 | 46.93 |
| chr6 | 97882654  | 97884478  | 1825 | 614  | 34 | 32.99 | 5.51 | 49.2  |
| chr6 | 97940841  | 97941714  | 874  | 589  | 22 | 41.2  | 4.93 | 46.62 |
| chr6 | 98301824  | 98303003  | 1180 | 468  | 29 | 53.17 | 5.34 | 51.85 |
| chr6 | 98364330  | 98365167  | 838  | 251  | 18 | 30.27 | 3.7  | 51.68 |
| chr6 | 98599957  | 98601153  | 1197 | 582  | 29 | 52.07 | 5.75 | 51.2  |
| chr6 | 98959947  | 98960930  | 984  | 475  | 22 | 34.6  | 5.34 | 47.68 |
| chr6 | 99051432  | 99052331  | 900  | 617  | 21 | 39.53 | 6.16 | 46.86 |
| chr6 | 100035681 | 100036432 | 752  | 271  | 20 | 45.01 | 7.8  | 49.09 |
| chr6 | 100143517 | 100144272 | 756  | 478  | 17 | 30.71 | 4.93 | 51.03 |
| chr6 | 100273927 | 100274964 | 1038 | 580  | 21 | 31.78 | 6.16 | 49.85 |
| chr6 | 100304350 | 100305493 | 1144 | 491  | 23 | 30.45 | 5.75 | 51.27 |
| chr6 | 100324702 | 100325713 | 1012 | 667  | 21 | 33.11 | 4.52 | 49.16 |
| chr6 | 100389488 | 100390254 | 767  | 285  | 17 | 30.07 | 4.52 | 51.5  |
| chr6 | 100408764 | 100410173 | 1410 | 747  | 33 | 52.19 | 4.93 | 51.36 |
| chr6 | 100543295 | 100544228 | 934  | 358  | 26 | 56.23 | 6.57 | 53.72 |
| chr6 | 100643875 | 100644468 | 594  | 268  | 15 | 31.95 | 5.75 | 49.78 |
| chr6 | 100979098 | 100980061 | 964  | 405  | 28 | 55.61 | 8.1  | 54.07 |
| chr6 | 101163315 | 101164589 | 1275 | 1010 | 30 | 44.19 | 4.09 | 48.02 |
| chr6 | 101254545 | 101256101 | 1557 | 289  | 34 | 38.86 | 3.64 | 46.27 |
| chr6 | 101504388 | 101505938 | 1551 | 285  | 34 | 42.45 | 4.19 | 47.37 |
| chr6 | 101783884 | 101784895 | 1012 | 341  | 22 | 33.11 | 4.52 | 49.16 |
| chr6 | 101913613 | 101914721 | 1109 | 589  | 24 | 35.99 | 6.57 | 47.09 |
| chr6 | 102092594 | 102093511 | 918  | 224  | 20 | 30.26 | 4.19 | 51.67 |
| chr6 | 102195724 | 102196736 | 1013 | 731  | 24 | 41.39 | 7.39 | 46.95 |
| chr6 | 102262315 | 102263953 | 1639 | 525  | 32 | 34.94 | 4.19 | 47.71 |
| chr6 | 102329881 | 102330853 | 973  | 241  | 20 | 31.17 | 4.93 | 50.55 |
| chr6 | 102736722 | 102737634 | 913  | 261  | 21 | 34.52 | 4.95 | 47.72 |
| chr6 | 102780650 | 102781579 | 930  | 642  | 20 | 33.46 | 6.16 | 48.63 |
| chr6 | 102869372 | 102870849 | 1478 | 831  | 33 | 48.39 | 7.39 | 49.2  |
| chr6 | 102958696 | 102959739 | 1044 | 392  | 22 | 31.48 | 5.34 | 49.97 |
| chr6 | 103031254 | 103032296 | 1043 | 286  | 27 | 47.64 | 5.71 | 49.21 |
| chr6 | 103280190 | 103281081 | 892  | 282  | 20 | 35.63 | 5.75 | 47.33 |
| chr6 | 103608626 | 103609308 | 683  | 329  | 16 | 30.73 | 4.52 | 50.98 |
| chr6 | 103841070 | 103841902 | 833  | 285  | 18 | 30.55 | 4.93 | 51.23 |
| chr6 | 104889486 | 104890471 | 986  | 712  | 21 | 34.5  | 6.16 | 47.68 |
| chr6 | 104914366 | 104915009 | 644  | 254  | 18 | 43.24 | 5.75 | 47.7  |
| chr6 | 105080085 | 105080955 | 871  | 433  | 20 | 36.89 | 5.75 | 46.68 |
| chr6 | 105103203 | 105104228 | 1026 | 549  | 21 | 31.38 | 5.64 | 50.22 |

|      |           |           |      |      |     |       |      |       |
|------|-----------|-----------|------|------|-----|-------|------|-------|
| chr6 | 105482170 | 105484397 | 2228 | 587  | 46  | 39.68 | 3.77 | 46.54 |
| chr6 | 105695214 | 105696427 | 1214 | 520  | 26  | 38.44 | 5.75 | 46.38 |
| chr6 | 106042025 | 106042973 | 949  | 660  | 23  | 30.71 | 4.79 | 51.04 |
| chr6 | 106046631 | 106047567 | 937  | 655  | 20  | 33.07 | 4.52 | 49.17 |
| chr6 | 106360606 | 106361460 | 855  | 367  | 19  | 33.51 | 5.34 | 48.65 |
| chr6 | 106476564 | 106477574 | 1011 | 510  | 21  | 31.54 | 6.37 | 49.95 |
| chr6 | 106532722 | 106533593 | 872  | 598  | 21  | 30.36 | 4.7  | 51.61 |
| chr6 | 106568627 | 106569996 | 1370 | 1087 | 33  | 54.56 | 5.75 | 54.08 |
| chr6 | 106828992 | 106830257 | 1266 | 1002 | 33  | 54.77 | 6.09 | 54.18 |
| chr6 | 106886327 | 106887411 | 1085 | 399  | 26  | 34.16 | 4.45 | 48.01 |
| chr6 | 107045156 | 107046447 | 1292 | 563  | 35  | 36.09 | 5.85 | 46.97 |
| chr6 | 107075955 | 107077415 | 1461 | 810  | 37  | 35.03 | 4.85 | 47.47 |
| chr6 | 107147471 | 107148586 | 1116 | 331  | 31  | 32.84 | 3.42 | 49.37 |
| chr6 | 107397140 | 107398097 | 958  | 482  | 21  | 31.97 | 4.95 | 49.85 |
| chr6 | 107592465 | 107594119 | 1655 | 465  | 35  | 33.15 | 3.42 | 49.16 |
| chr6 | 107892678 | 107893949 | 1272 | 801  | 30  | 45.17 | 6.4  | 49.04 |
| chr6 | 107907898 | 107909084 | 1187 | 569  | 27  | 32.29 | 5.82 | 50.12 |
| chr6 | 108164575 | 108165675 | 1101 | 329  | 25  | 37.88 | 7.09 | 46.59 |
| chr6 | 108466604 | 108467417 | 814  | 545  | 18  | 31.62 | 4.93 | 49.94 |
| chr6 | 108547647 | 108549049 | 1403 | 457  | 31  | 30.6  | 3.52 | 51.26 |
| chr6 | 108552058 | 108553980 | 1923 | 482  | 45  | 36.08 | 5.02 | 46.95 |
| chr6 | 109155346 | 109157164 | 1819 | 798  | 39  | 47.26 | 4.19 | 48.07 |
| chr6 | 109505390 | 109506100 | 711  | 411  | 17  | 33.48 | 4.52 | 48.67 |
| chr6 | 109569460 | 109570072 | 613  | 275  | 15  | 30.66 | 4.52 | 51.05 |
| chr6 | 109883426 | 109884254 | 829  | 386  | 19  | 35.05 | 4.93 | 47.49 |
| chr6 | 110012223 | 110013118 | 896  | 624  | 21  | 36.76 | 5.06 | 46.93 |
| chr6 | 110435909 | 110437101 | 1193 | 603  | 24  | 31.85 | 5.75 | 49.77 |
| chr6 | 110612264 | 110613728 | 1465 | 716  | 34  | 53.22 | 6.16 | 51.6  |
| chr6 | 110849172 | 110850338 | 1167 | 578  | 24  | 33.08 | 6.98 | 49.14 |
| chr6 | 111468719 | 111469494 | 776  | 514  | 19  | 38.44 | 4.52 | 46.41 |
| chr6 | 111579908 | 111581145 | 1238 | 666  | 31  | 31.83 | 5.76 | 49.82 |
| chr6 | 111785097 | 111786174 | 1078 | 608  | 29  | 33.23 | 4.53 | 49.06 |
| chr6 | 113092046 | 113092994 | 949  | 542  | 21  | 36.57 | 4.93 | 46.89 |
| chr6 | 113479474 | 113480283 | 810  | 379  | 19  | 36.23 | 4.93 | 46.97 |
| chr6 | 113785917 | 113786847 | 931  | 285  | 21  | 37.63 | 6.98 | 45.83 |
| chr6 | 114107986 | 114108809 | 824  | 453  | 18  | 31.05 | 4.93 | 50.62 |
| chr6 | 114639565 | 114641522 | 1958 | 521  | 42  | 41.49 | 5.14 | 47.08 |
| chr6 | 114940920 | 114941981 | 1062 | 329  | 21  | 30.6  | 5.75 | 51.21 |
| chr6 | 115210111 | 115211167 | 1057 | 555  | 21  | 30.84 | 4.93 | 50.83 |
| chr6 | 115581180 | 115582261 | 1082 | 565  | 24  | 37.43 | 4.93 | 46.43 |
| chr6 | 115701243 | 115702896 | 1654 | 1047 | 30  | 32.95 | 3.7  | 49.3  |
| chr6 | 116584105 | 116585307 | 1203 | 618  | 24  | 31.39 | 5.75 | 50.21 |
| chr6 | 116648707 | 116649771 | 1065 | 815  | 21  | 30.45 | 4.11 | 51.29 |
| chr6 | 116684291 | 116685255 | 965  | 569  | 23  | 31.44 | 6    | 50.01 |
| chr6 | 116814138 | 116815066 | 929  | 252  | 21  | 36.04 | 4.38 | 46.88 |
| chr6 | 117134211 | 117135235 | 1025 | 761  | 28  | 45.76 | 4.79 | 49.96 |
| chr6 | 117437263 | 117438013 | 751  | 190  | 18  | 31.81 | 4.19 | 49.85 |
| chr6 | 117640859 | 117648332 | 7474 | 1566 | 214 | 80.91 | 4.23 | 54    |
| chr6 | 117656587 | 117658833 | 2247 | 653  | 50  | 69.48 | 6.08 | 54.03 |
| chr6 | 117674043 | 117674897 | 855  | 267  | 20  | 32.18 | 4.05 | 49.95 |
| chr6 | 117680312 | 117681414 | 1103 | 725  | 27  | 30.98 | 4.98 | 50.44 |
| chr6 | 117686272 | 117687774 | 1503 | 1152 | 35  | 40.29 | 4.45 | 46.86 |

|      |           |           |      |      |    |       |      |       |
|------|-----------|-----------|------|------|----|-------|------|-------|
| chr6 | 117784063 | 117784798 | 736  | 448  | 17 | 31.91 | 4.52 | 49.82 |
| chr6 | 117814340 | 117815363 | 1024 | 436  | 21 | 32.49 | 6.16 | 49.45 |
| chr6 | 117899060 | 117900451 | 1392 | 760  | 31 | 39.25 | 5.05 | 46.37 |
| chr6 | 117961583 | 117962597 | 1015 | 522  | 26 | 50.32 | 7.39 | 51.78 |
| chr6 | 118151321 | 118152408 | 1088 | 721  | 23 | 33.14 | 4.93 | 49.16 |
| chr6 | 118337256 | 118338382 | 1127 | 277  | 25 | 39.06 | 5.75 | 46.31 |
| chr6 | 118487561 | 118488319 | 759  | 204  | 18 | 34.95 | 4.93 | 47.68 |
| chr6 | 118579554 | 118580506 | 953  | 438  | 27 | 59.83 | 6.57 | 56.45 |
| chr6 | 118595807 | 118596622 | 816  | 533  | 19 | 35.85 | 4.52 | 46.94 |
| chr6 | 118841382 | 118842940 | 1559 | 855  | 37 | 58.66 | 5.64 | 52.66 |
| chr6 | 118972176 | 118974569 | 2394 | 1182 | 50 | 55.03 | 4.19 | 53.54 |
| chr6 | 119289331 | 119290781 | 1451 | 1018 | 31 | 42.64 | 3.94 | 47.42 |
| chr6 | 119748090 | 119748980 | 891  | 473  | 20 | 31.75 | 5.71 | 49.79 |
| chr6 | 119751651 | 119752723 | 1073 | 690  | 23 | 33.9  | 4.52 | 48.62 |
| chr6 | 119902056 | 119903714 | 1659 | 1164 | 36 | 49.1  | 5.24 | 50.66 |
| chr6 | 120084139 | 120084970 | 832  | 189  | 18 | 30.6  | 4.93 | 51.25 |
| chr6 | 120256185 | 120257062 | 878  | 517  | 21 | 36.65 | 4.57 | 47    |
| chr6 | 120497019 | 120498079 | 1061 | 583  | 21 | 30.64 | 5.34 | 51.13 |
| chr6 | 120521038 | 120521612 | 575  | 287  | 15 | 32.66 | 6.16 | 49.32 |
| chr6 | 120708178 | 120709293 | 1116 | 651  | 23 | 31.77 | 4.93 | 49.85 |
| chr6 | 120823436 | 120824266 | 831  | 286  | 20 | 39.42 | 4.93 | 47.03 |
| chr6 | 121006748 | 121007498 | 751  | 262  | 20 | 45.08 | 5.34 | 48.88 |
| chr6 | 121022371 | 121023326 | 956  | 256  | 20 | 32.05 | 6.16 | 49.81 |
| chr6 | 121035503 | 121036165 | 663  | 378  | 19 | 46.95 | 6.57 | 47.57 |
| chr6 | 121083363 | 121084216 | 854  | 529  | 19 | 33.57 | 4.52 | 48.6  |
| chr6 | 121263907 | 121265142 | 1236 | 514  | 30 | 40.41 | 7.88 | 46.84 |
| chr6 | 121447475 | 121449203 | 1729 | 309  | 34 | 34.41 | 4.57 | 47.76 |
| chr6 | 121657459 | 121658985 | 1527 | 1157 | 34 | 37.97 | 4.24 | 46.36 |
| chr6 | 121753696 | 121754406 | 711  | 448  | 19 | 43.1  | 5.34 | 47.29 |
| chr6 | 121778149 | 121779133 | 985  | 416  | 21 | 34.55 | 4.52 | 47.78 |
| chr6 | 121995566 | 121996346 | 781  | 502  | 20 | 42.86 | 4.93 | 47.25 |
| chr6 | 122209253 | 122209801 | 549  | 274  | 15 | 37.66 | 6.16 | 46.06 |
| chr6 | 122277005 | 122277895 | 891  | 228  | 19 | 31.48 | 4.11 | 49.85 |
| chr6 | 122429808 | 122430638 | 831  | 455  | 18 | 30.66 | 5.75 | 51.04 |
| chr6 | 122564103 | 122565130 | 1028 | 530  | 21 | 32.28 | 4.52 | 50.03 |
| chr6 | 122813539 | 122814359 | 821  | 350  | 19 | 30.68 | 4.84 | 51.02 |
| chr6 | 122958467 | 122959302 | 836  | 572  | 18 | 30.38 | 4.11 | 51.65 |
| chr6 | 123044973 | 123046005 | 1033 | 420  | 23 | 36.02 | 6.16 | 46.99 |
| chr6 | 123101200 | 123102371 | 1172 | 649  | 25 | 36.67 | 6.16 | 47    |
| chr6 | 123535376 | 123537256 | 1881 | 627  | 35 | 37.07 | 4.11 | 46.95 |
| chr6 | 123870492 | 123871158 | 667  | 275  | 17 | 36.46 | 5.34 | 47.13 |
| chr6 | 124004132 | 124005258 | 1127 | 514  | 26 | 43.23 | 7.39 | 47.62 |
| chr6 | 124079630 | 124080945 | 1316 | 726  | 26 | 33.49 | 4.93 | 48.68 |
| chr6 | 124087043 | 124088018 | 976  | 436  | 20 | 31.01 | 4.93 | 50.49 |
| chr6 | 124426800 | 124427660 | 861  | 578  | 21 | 42.06 | 6.16 | 46.99 |
| chr6 | 125326261 | 125327027 | 767  | 489  | 18 | 34.45 | 5.34 | 47.77 |
| chr6 | 125358682 | 125359487 | 806  | 218  | 22 | 43.42 | 6.69 | 47.85 |
| chr6 | 125551798 | 125552683 | 886  | 616  | 21 | 40.42 | 4.52 | 46.82 |
| chr6 | 125790134 | 125790986 | 853  | 286  | 19 | 33.62 | 4.93 | 48.69 |
| chr6 | 125805129 | 125805830 | 702  | 431  | 17 | 34.07 | 4.93 | 48.38 |
| chr6 | 125973039 | 125973916 | 878  | 288  | 20 | 36.46 | 5.34 | 47.12 |
| chr6 | 125978824 | 125979739 | 916  | 627  | 21 | 34.95 | 4.62 | 47.7  |

|      |           |           |      |      |    |       |      |       |
|------|-----------|-----------|------|------|----|-------|------|-------|
| chr6 | 126161948 | 126163227 | 1280 | 517  | 29 | 30.75 | 4.2  | 50.97 |
| chr6 | 126470625 | 126471687 | 1063 | 282  | 22 | 30.55 | 5.75 | 51.18 |
| chr6 | 126506894 | 126507788 | 895  | 270  | 21 | 35.6  | 4.19 | 47.17 |
| chr6 | 126550007 | 126550766 | 760  | 539  | 18 | 33.96 | 4.03 | 48.63 |
| chr6 | 126585440 | 126586577 | 1138 | 259  | 27 | 46.89 | 4.93 | 47.68 |
| chr6 | 127201445 | 127202364 | 920  | 553  | 21 | 38.29 | 4.93 | 46.31 |
| chr6 | 127707435 | 127708367 | 933  | 609  | 20 | 33.29 | 4.11 | 48.81 |
| chr6 | 127759330 | 127760208 | 879  | 285  | 20 | 36.4  | 4.93 | 47.15 |
| chr6 | 128593561 | 128594501 | 941  | 636  | 20 | 32.86 | 4.93 | 49.3  |
| chr6 | 129074657 | 129075656 | 1000 | 528  | 21 | 33.74 | 4.93 | 48.62 |
| chr6 | 129076415 | 129077638 | 1224 | 628  | 25 | 34.09 | 6.16 | 48.19 |
| chr6 | 129130847 | 129131654 | 808  | 417  | 18 | 31.97 | 4.93 | 49.79 |
| chr6 | 129138732 | 129140067 | 1336 | 662  | 30 | 35.05 | 4.45 | 47.53 |
| chr6 | 129655428 | 129656478 | 1051 | 538  | 25 | 43.45 | 6.16 | 47.99 |
| chr6 | 130053984 | 130054869 | 886  | 584  | 19 | 31.4  | 5.3  | 50.2  |
| chr6 | 130242887 | 130243843 | 957  | 271  | 21 | 36.11 | 5.34 | 46.95 |
| chr6 | 130738895 | 130739834 | 940  | 262  | 27 | 59.31 | 5.23 | 54.43 |
| chr6 | 130837532 | 130838277 | 746  | 472  | 17 | 31.31 | 4.93 | 50.36 |
| chr6 | 131218152 | 131219993 | 1842 | 482  | 43 | 65.06 | 5.75 | 54.19 |
| chr6 | 131538521 | 131539410 | 890  | 464  | 20 | 35.75 | 6.16 | 47.03 |
| chr6 | 132804146 | 132805554 | 1409 | 685  | 36 | 43.55 | 3.84 | 47.94 |
| chr6 | 132978718 | 132979573 | 856  | 337  | 19 | 33.08 | 4.89 | 49.18 |
| chr6 | 133135712 | 133138216 | 2505 | 1869 | 54 | 34.2  | 4.47 | 47.92 |
| chr6 | 133151294 | 133152184 | 891  | 288  | 19 | 31.48 | 4.52 | 49.85 |
| chr6 | 133557423 | 133558227 | 805  | 344  | 18 | 32.14 | 4.52 | 49.83 |
| chr6 | 134272748 | 134274183 | 1436 | 797  | 39 | 30.57 | 3.91 | 51.26 |
| chr6 | 134464199 | 134465405 | 1207 | 646  | 24 | 31.2  | 6.16 | 50.55 |
| chr6 | 134634306 | 134635555 | 1250 | 593  | 26 | 36.61 | 5.34 | 46.96 |
| chr6 | 134880007 | 134880913 | 907  | 580  | 22 | 39.09 | 4.52 | 46.3  |
| chr6 | 135155264 | 135155878 | 615  | 324  | 15 | 30.53 | 5.34 | 51.26 |
| chr6 | 135429360 | 135430745 | 1386 | 773  | 30 | 44.74 | 7.75 | 48.83 |
| chr6 | 135598453 | 135599898 | 1446 | 892  | 37 | 35.81 | 5.14 | 47.17 |
| chr6 | 135601760 | 135602653 | 894  | 371  | 19 | 31.32 | 4.93 | 50.32 |
| chr6 | 135772113 | 135773448 | 1336 | 932  | 41 | 42.33 | 4.16 | 47.2  |
| chr6 | 135798252 | 135799318 | 1067 | 483  | 25 | 33.88 | 5.71 | 48.59 |
| chr6 | 135852981 | 135853971 | 991  | 727  | 23 | 38.39 | 4.93 | 46.31 |
| chr6 | 136063860 | 136064845 | 986  | 355  | 21 | 34.5  | 5.34 | 47.68 |
| chr6 | 136171769 | 136172895 | 1127 | 364  | 23 | 31.24 | 4.11 | 50.47 |
| chr6 | 136267390 | 136268841 | 1452 | 1188 | 31 | 42.59 | 4.33 | 47.23 |
| chr6 | 136385509 | 136386527 | 1019 | 666  | 27 | 54.82 | 8.22 | 54.4  |
| chr6 | 136482384 | 136483358 | 975  | 440  | 22 | 35.1  | 5.34 | 47.34 |
| chr6 | 136562567 | 136563251 | 685  | 290  | 16 | 30.61 | 5.34 | 51.15 |
| chr6 | 136899158 | 136899789 | 632  | 390  | 17 | 30.59 | 5.14 | 51.24 |
| chr6 | 137911237 | 137912171 | 935  | 286  | 21 | 33.25 | 5.71 | 48.93 |
| chr6 | 138003652 | 138005540 | 1889 | 551  | 40 | 54.52 | 6.57 | 54.46 |
| chr6 | 138623903 | 138624935 | 1033 | 289  | 23 | 36.02 | 5.34 | 46.99 |
| chr6 | 138678738 | 138679579 | 842  | 582  | 18 | 30.05 | 4.93 | 51.39 |
| chr6 | 139107363 | 139108202 | 840  | 286  | 19 | 34.39 | 5.34 | 47.73 |
| chr6 | 139983764 | 139984587 | 824  | 287  | 18 | 31.05 | 5.75 | 50.62 |
| chr6 | 140002082 | 140003583 | 1502 | 247  | 31 | 43.23 | 4.11 | 47.65 |
| chr6 | 140087959 | 140088874 | 916  | 647  | 19 | 30.15 | 4.11 | 51.66 |
| chr6 | 140104518 | 140105804 | 1287 | 749  | 28 | 42.56 | 4.93 | 47.14 |

|      |           |           |      |      |    |       |      |       |
|------|-----------|-----------|------|------|----|-------|------|-------|
| chr6 | 140386951 | 140387752 | 802  | 287  | 18 | 32.32 | 5.34 | 50.01 |
| chr6 | 140694177 | 140694772 | 596  | 283  | 19 | 48.64 | 6.47 | 50.05 |
| chr6 | 140724593 | 140725377 | 785  | 363  | 20 | 32.83 | 4.79 | 49.42 |
| chr6 | 141136324 | 141137423 | 1100 | 632  | 23 | 32.54 | 5.75 | 49.35 |
| chr6 | 141188788 | 141189502 | 715  | 328  | 17 | 32.89 | 5.3  | 49.33 |
| chr6 | 141206684 | 141207306 | 623  | 282  | 19 | 50.47 | 6.98 | 51.95 |
| chr6 | 141295675 | 141296602 | 928  | 272  | 22 | 33.65 | 4.57 | 48.68 |
| chr6 | 141324505 | 141325716 | 1212 | 637  | 26 | 38.54 | 4.93 | 46.28 |
| chr6 | 142002363 | 142003601 | 1239 | 487  | 25 | 32.27 | 6.85 | 50.06 |
| chr6 | 142086997 | 142088653 | 1657 | 1094 | 35 | 33.06 | 3.77 | 49.18 |
| chr6 | 142222041 | 142223562 | 1522 | 277  | 35 | 40.88 | 5.24 | 46.4  |
| chr6 | 142388753 | 142389497 | 745  | 333  | 17 | 31.37 | 4.93 | 50.22 |
| chr6 | 142606263 | 142607237 | 975  | 423  | 20 | 31.07 | 4.93 | 50.75 |
| chr6 | 142638087 | 142639051 | 965  | 644  | 22 | 32.17 | 5    | 49.94 |
| chr6 | 142663840 | 142665419 | 1580 | 1107 | 32 | 33.74 | 3.97 | 48.65 |
| chr6 | 142698979 | 142699979 | 1001 | 621  | 21 | 33.69 | 5.34 | 48.59 |
| chr6 | 143221764 | 143222530 | 767  | 515  | 18 | 34.45 | 5.34 | 47.77 |
| chr6 | 143312890 | 143314463 | 1574 | 1240 | 37 | 47.61 | 5.39 | 48.94 |
| chr6 | 143452509 | 143453782 | 1274 | 612  | 26 | 30.9  | 4.95 | 50.69 |
| chr6 | 143541077 | 143542379 | 1303 | 595  | 25 | 30.51 | 5.75 | 51.29 |
| chr6 | 143783852 | 143785149 | 1298 | 620  | 28 | 36.85 | 6.47 | 46.78 |
| chr6 | 143908600 | 143909533 | 934  | 436  | 21 | 37.45 | 6.57 | 46.33 |
| chr6 | 143927191 | 143928175 | 985  | 578  | 21 | 34.55 | 4.93 | 47.78 |
| chr6 | 144537633 | 144538872 | 1240 | 513  | 29 | 35.88 | 5.76 | 47.02 |
| chr6 | 144585468 | 144587449 | 1982 | 1458 | 39 | 50.02 | 6.16 | 51.78 |
| chr6 | 144592267 | 144593027 | 761  | 471  | 19 | 39.47 | 4.52 | 47.04 |
| chr6 | 145076923 | 145077834 | 912  | 324  | 19 | 30.36 | 6.16 | 51.57 |
| chr6 | 145225351 | 145227014 | 1664 | 468  | 36 | 35.85 | 4.79 | 47    |
| chr6 | 145395274 | 145396191 | 918  | 272  | 20 | 34.13 | 4.93 | 48.07 |
| chr6 | 145534526 | 145536016 | 1491 | 909  | 33 | 37.82 | 3.97 | 46.65 |
| chr6 | 145790746 | 145791805 | 1060 | 326  | 21 | 30.69 | 4.11 | 51.01 |
| chr6 | 145981721 | 145982410 | 690  | 289  | 17 | 34.87 | 5.34 | 47.63 |
| chr6 | 146035133 | 146036669 | 1537 | 899  | 31 | 41.53 | 5.34 | 47.13 |
| chr6 | 146277413 | 146279001 | 1589 | 1131 | 35 | 33.25 | 4.28 | 48.95 |
| chr6 | 146343464 | 146344490 | 1027 | 716  | 21 | 32.33 | 5.34 | 49.98 |
| chr6 | 146928981 | 146929952 | 972  | 355  | 20 | 31.22 | 3.7  | 50.59 |
| chr6 | 147121880 | 147123292 | 1413 | 1139 | 32 | 52.02 | 4.93 | 51.04 |
| chr6 | 147562968 | 147563865 | 898  | 432  | 19 | 31.11 | 4.52 | 50.64 |
| chr6 | 147711704 | 147712626 | 923  | 638  | 20 | 30.54 | 5    | 51.17 |
| chr6 | 148071649 | 148072965 | 1317 | 712  | 28 | 40.98 | 4.11 | 46.21 |
| chr6 | 148363030 | 148363931 | 902  | 625  | 20 | 35.04 | 4.93 | 47.43 |
| chr6 | 149182102 | 149182841 | 740  | 455  | 17 | 31.67 | 5.34 | 49.82 |
| chr6 | 149297773 | 149298843 | 1071 | 477  | 21 | 30.16 | 6.57 | 51.62 |
| chr6 | 149601494 | 149602817 | 1324 | 722  | 29 | 44.6  | 6.98 | 48.91 |
| chr6 | 149664374 | 149665413 | 1040 | 460  | 22 | 30.08 | 6.37 | 51.55 |
| chr6 | 149783919 | 149785462 | 1544 | 795  | 31 | 32.11 | 5.77 | 49.72 |
| chr6 | 149805639 | 149807122 | 1484 | 665  | 40 | 36.61 | 3.95 | 46.95 |
| chr6 | 149996894 | 149998367 | 1474 | 270  | 32 | 37.15 | 3.88 | 46.92 |
| chr6 | 150389834 | 150390447 | 614  | 330  | 16 | 34.53 | 6.04 | 47.71 |
| chr6 | 150793129 | 150794268 | 1140 | 854  | 25 | 38.35 | 6.57 | 46.33 |
| chr6 | 150883321 | 150884755 | 1435 | 830  | 33 | 43.87 | 7.53 | 47.92 |
| chr6 | 151076722 | 151077929 | 1208 | 673  | 25 | 34.87 | 8.22 | 47.65 |



|      |           |           |      |      |    |        |       |       |
|------|-----------|-----------|------|------|----|--------|-------|-------|
| chr6 | 151979609 | 151980914 | 1306 | 663  | 31 | 42.38  | 5.3   | 47.1  |
| chr6 | 152165327 | 152166367 | 1041 | 524  | 24 | 39.74  | 5.75  | 46.65 |
| chr6 | 152198179 | 152199597 | 1419 | 638  | 30 | 38.9   | 4.62  | 46.26 |
| chr6 | 152858147 | 152859317 | 1171 | 564  | 24 | 32.88  | 4.93  | 49.32 |
| chr6 | 153088165 | 153089076 | 912  | 647  | 19 | 30.36  | 4.93  | 51.57 |
| chr6 | 153319414 | 153320602 | 1189 | 800  | 27 | 32.8   | 3.81  | 49.44 |
| chr6 | 153413266 | 153414261 | 996  | 544  | 22 | 31.12  | 5.84  | 50.7  |
| chr6 | 153505840 | 153506571 | 732  | 483  | 18 | 36.73  | 5.34  | 47.04 |
| chr6 | 153523284 | 153524683 | 1400 | 610  | 34 | 57.09  | 5.34  | 53.15 |
| chr6 | 153927249 | 153928268 | 1020 | 470  | 22 | 32.69  | 5.34  | 49.36 |
| chr6 | 154005036 | 154005939 | 904  | 389  | 23 | 43.83  | 6.57  | 47.96 |
| chr6 | 154392214 | 154393205 | 992  | 267  | 24 | 42.68  | 4.52  | 47.4  |
| chr6 | 154422888 | 154423943 | 1056 | 376  | 22 | 30.89  | 5.34  | 50.76 |
| chr6 | 155113318 | 155114794 | 1477 | 1269 | 31 | 35.1   | 3.97  | 47.35 |
| chr6 | 155605966 | 155607171 | 1206 | 570  | 27 | 42.91  | 4.52  | 47.36 |
| chr6 | 155619107 | 155619932 | 826  | 278  | 18 | 30.59  | 4.89  | 51.23 |
| chr6 | 155817617 | 155818663 | 1047 | 518  | 23 | 35.26  | 4.93  | 47.33 |
| chr6 | 155892733 | 155893564 | 832  | 566  | 19 | 31.64  | 4.23  | 49.89 |
| chr6 | 156048310 | 156049681 | 1372 | 856  | 29 | 42.07  | 6.16  | 47.08 |
| chr6 | 156720569 | 156721544 | 976  | 727  | 22 | 35.04  | 4.93  | 47.48 |
| chr6 | 156794240 | 156795084 | 845  | 285  | 19 | 34.09  | 5.75  | 48.17 |
| chr6 | 157070185 | 157070894 | 710  | 425  | 17 | 32.67  | 4.83  | 49.42 |
| chr6 | 157092660 | 157093586 | 927  | 640  | 25 | 46.64  | 4.95  | 47.37 |
| chr6 | 157506912 | 157508286 | 1375 | 894  | 30 | 45.33  | 4.89  | 49.39 |
| chr6 | 157525348 | 157526072 | 725  | 288  | 19 | 32.67  | 4.79  | 49.35 |
| chr6 | 158259331 | 158260312 | 982  | 693  | 21 | 34.71  | 4.93  | 47.7  |
| chr6 | 159190369 | 159191216 | 848  | 588  | 20 | 32.59  | 4.05  | 49.42 |
| chr6 | 159584082 | 159585000 | 919  | 642  | 20 | 30.21  | 3.81  | 51.75 |
| chr6 | 159861550 | 159862727 | 1178 | 568  | 25 | 36.36  | 5.75  | 47.16 |
| chr6 | 160102656 | 160104144 | 1489 | 507  | 32 | 36.43  | 3.53  | 47.17 |
| chr6 | 160291515 | 160292778 | 1264 | 668  | 26 | 35.93  | 5.75  | 47.07 |
| chr6 | 161411131 | 161412187 | 1057 | 543  | 29 | 35.05  | 4     | 47.52 |
| chr6 | 161807703 | 161808378 | 676  | 404  | 18 | 40.73  | 6.57  | 46.55 |
| chr6 | 162405538 | 162406440 | 903  | 702  | 19 | 30.84  | 4.11  | 50.85 |
| chr6 | 163163996 | 163164869 | 874  | 610  | 21 | 36.9   | 4.95  | 46.74 |
| chr6 | 165362053 | 165362672 | 620  | 339  | 17 | 39.97  | 6.57  | 46.81 |
| chr6 | 165852216 | 165852962 | 747  | 334  | 19 | 40.45  | 4.93  | 46.88 |
| chr6 | 166032512 | 166033420 | 909  | 323  | 19 | 30.52  | 4.93  | 51.32 |
| chr6 | 167067186 | 167067886 | 701  | 456  | 17 | 34.14  | 5.34  | 48.03 |
| chr6 | 167074344 | 167075349 | 1006 | 523  | 24 | 41.82  | 5.75  | 46.95 |
| chr6 | 168361653 | 168362500 | 848  | 447  | 20 | 38.32  | 5.34  | 46.5  |
| chr6 | 169421712 | 169422541 | 830  | 273  | 18 | 30.71  | 3.7   | 50.99 |
| chr6 | 169604777 | 169605594 | 818  | 242  | 18 | 31.39  | 4.52  | 50.18 |
| chr6 | 169702714 | 169703690 | 977  | 357  | 20 | 30.59  | 4.48  | 51.24 |
| chr6 | 169839166 | 169840205 | 1040 | 458  | 26 | 48.64  | 6.98  | 49.9  |
| chr6 | 170488875 | 170489980 | 1106 | 413  | 42 | 125.75 | 15.2  | 23.53 |
| chr6 | 170882633 | 170884649 | 2017 | 592  | 42 | 44.18  | 5.45  | 48.06 |
| chr7 | 9846      | 10682     | 837  | 285  | 57 | 184.31 | 14.07 | 14.29 |
| chr7 | 2223263   | 2224581   | 1319 | 669  | 29 | 44.87  | 6.57  | 48.84 |
| chr7 | 2303598   | 2304428   | 831  | 585  | 20 | 39.42  | 4.93  | 47.03 |
| chr7 | 2604204   | 2604969   | 766  | 489  | 17 | 30.13  | 5.75  | 51.65 |
| chr7 | 2793708   | 2794358   | 651  | 370  | 16 | 32.8   | 5.34  | 49.46 |

|      |          |          |      |      |    |       |      |       |
|------|----------|----------|------|------|----|-------|------|-------|
| chr7 | 3554342  | 3555471  | 1130 | 800  | 24 | 34.91 | 5.34 | 47.61 |
| chr7 | 3592691  | 3593655  | 965  | 252  | 21 | 35.66 | 5.34 | 47.29 |
| chr7 | 3801813  | 3802722  | 910  | 333  | 21 | 38.91 | 4.93 | 46.27 |
| chr7 | 3838460  | 3839103  | 644  | 352  | 16 | 33.28 | 4.93 | 48.94 |
| chr7 | 5129264  | 5130170  | 907  | 690  | 21 | 39.09 | 5.34 | 46.3  |
| chr7 | 5441073  | 5441807  | 735  | 245  | 17 | 30.59 | 4.78 | 51.24 |
| chr7 | 5789508  | 5791120  | 1613 | 578  | 31 | 32.8  | 4.19 | 49.45 |
| chr7 | 6279937  | 6280696  | 760  | 498  | 17 | 30.48 | 4.93 | 51.27 |
| chr7 | 7065782  | 7067135  | 1354 | 681  | 29 | 37.71 | 4.95 | 46.53 |
| chr7 | 7159994  | 7161169  | 1176 | 700  | 29 | 53.43 | 5.75 | 51.9  |
| chr7 | 7295950  | 7297588  | 1639 | 668  | 41 | 57.49 | 5.65 | 53.66 |
| chr7 | 7298291  | 7298900  | 610  | 273  | 18 | 39.85 | 6.19 | 46.62 |
| chr7 | 7602404  | 7604604  | 2201 | 963  | 45 | 54.4  | 5.34 | 53.89 |
| chr7 | 7617751  | 7618965  | 1215 | 460  | 28 | 33.7  | 4.07 | 48.58 |
| chr7 | 7665826  | 7666797  | 972  | 592  | 21 | 35.27 | 5.34 | 47.3  |
| chr7 | 7725990  | 7726927  | 938  | 536  | 24 | 35.16 | 4.45 | 47.07 |
| chr7 | 7750732  | 7751952  | 1221 | 540  | 40 | 70.45 | 5.92 | 53.98 |
| chr7 | 7987465  | 7988413  | 949  | 664  | 23 | 32.34 | 5.3  | 49.89 |
| chr7 | 8115651  | 8116850  | 1200 | 595  | 25 | 31.47 | 5.39 | 49.99 |
| chr7 | 8204759  | 8206468  | 1710 | 638  | 33 | 33.64 | 4.09 | 48.81 |
| chr7 | 8291473  | 8292381  | 909  | 682  | 22 | 38.97 | 4.52 | 46.04 |
| chr7 | 9444502  | 9445542  | 1041 | 765  | 23 | 35.59 | 7.39 | 47.17 |
| chr7 | 9459261  | 9460428  | 1168 | 761  | 24 | 30.67 | 5.12 | 51.05 |
| chr7 | 9522398  | 9523456  | 1059 | 769  | 21 | 30.74 | 6.98 | 50.97 |
| chr7 | 9558151  | 9559193  | 1043 | 579  | 28 | 44.53 | 6.85 | 48.73 |
| chr7 | 9686667  | 9688001  | 1335 | 732  | 26 | 32.64 | 5.75 | 49.39 |
| chr7 | 9933172  | 9935248  | 2077 | 1323 | 47 | 68.34 | 5.34 | 54.89 |
| chr7 | 10031621 | 10032521 | 901  | 419  | 23 | 44.03 | 5.75 | 48.09 |
| chr7 | 10056060 | 10057123 | 1064 | 639  | 24 | 38.43 | 5.75 | 46.35 |
| chr7 | 10169247 | 10170316 | 1070 | 479  | 22 | 30.21 | 4.52 | 51.72 |
| chr7 | 10191093 | 10192151 | 1059 | 473  | 21 | 30.74 | 4.93 | 50.97 |
| chr7 | 10561768 | 10562678 | 911  | 288  | 19 | 30.42 | 4.93 | 51.31 |
| chr7 | 11243642 | 11244398 | 757  | 267  | 17 | 30.65 | 4.93 | 51.07 |
| chr7 | 11369388 | 11370647 | 1260 | 814  | 29 | 31.73 | 4.85 | 49.75 |
| chr7 | 11512442 | 11514389 | 1948 | 634  | 39 | 41.36 | 3.81 | 46.94 |
| chr7 | 11732676 | 11733353 | 678  | 277  | 21 | 43.1  | 4.94 | 47.24 |
| chr7 | 11770480 | 11771804 | 1325 | 649  | 29 | 36.25 | 5.1  | 46.94 |
| chr7 | 11993958 | 11994910 | 953  | 518  | 20 | 32.21 | 4.93 | 49.97 |
| chr7 | 12042763 | 12043640 | 878  | 499  | 20 | 36.46 | 5.75 | 47.12 |
| chr7 | 12097547 | 12098364 | 818  | 607  | 19 | 33.59 | 4.33 | 48.72 |
| chr7 | 12212042 | 12213063 | 1022 | 272  | 22 | 32.59 | 4.93 | 49.35 |
| chr7 | 12235616 | 12236385 | 770  | 490  | 18 | 34.26 | 4.93 | 47.87 |
| chr7 | 12244972 | 12245857 | 886  | 507  | 20 | 35.98 | 4.52 | 47.04 |
| chr7 | 12375911 | 12376820 | 910  | 330  | 19 | 30.47 | 3.7  | 51.26 |
| chr7 | 12389338 | 12390313 | 976  | 615  | 20 | 30.06 | 4.83 | 51.49 |
| chr7 | 13058233 | 13059047 | 815  | 339  | 21 | 45.28 | 5.75 | 49.18 |
| chr7 | 13278490 | 13279335 | 846  | 282  | 25 | 45.73 | 5.14 | 49.96 |
| chr7 | 13666057 | 13667070 | 1014 | 425  | 21 | 33    | 6.16 | 49.18 |
| chr7 | 13931205 | 13931987 | 783  | 398  | 18 | 33.46 | 5.34 | 48.67 |
| chr7 | 14191192 | 14192200 | 1009 | 483  | 24 | 37.04 | 6.85 | 47.04 |
| chr7 | 14300789 | 14301525 | 737  | 284  | 20 | 46.16 | 4.93 | 48.78 |
| chr7 | 14453560 | 14454730 | 1171 | 705  | 25 | 36.72 | 6.16 | 47.04 |

|      |          |          |      |      |    |       |      |       |
|------|----------|----------|------|------|----|-------|------|-------|
| chr7 | 14823479 | 14824198 | 720  | 365  | 17 | 32.91 | 4.93 | 49.34 |
| chr7 | 14853019 | 14853752 | 734  | 249  | 19 | 41.38 | 4.93 | 46.91 |
| chr7 | 15757388 | 15758265 | 878  | 288  | 20 | 36.46 | 5.34 | 47.12 |
| chr7 | 15990182 | 15991236 | 1055 | 534  | 23 | 34.84 | 5.75 | 47.54 |
| chr7 | 16948590 | 16949422 | 833  | 239  | 18 | 30.55 | 5.34 | 51.23 |
| chr7 | 17519592 | 17520560 | 969  | 279  | 24 | 44.14 | 8.63 | 48.04 |
| chr7 | 17599771 | 17600449 | 679  | 325  | 16 | 30.99 | 4.52 | 50.47 |
| chr7 | 17666874 | 17667604 | 731  | 446  | 22 | 51.88 | 6.16 | 50.81 |
| chr7 | 17803699 | 17804746 | 1048 | 420  | 21 | 31.28 | 4.52 | 50.39 |
| chr7 | 18121280 | 18122878 | 1599 | 566  | 31 | 38.67 | 4.52 | 46.16 |
| chr7 | 18254437 | 18255546 | 1110 | 622  | 27 | 48.64 | 5.75 | 50.1  |
| chr7 | 18432285 | 18433180 | 896  | 630  | 23 | 33.82 | 4.11 | 48.82 |
| chr7 | 18660675 | 18661720 | 1046 | 763  | 27 | 38.98 | 4.36 | 46.14 |
| chr7 | 18771407 | 18772071 | 665  | 387  | 17 | 36.6  | 5.34 | 46.93 |
| chr7 | 18859545 | 18860498 | 954  | 267  | 20 | 32.16 | 4.93 | 49.86 |
| chr7 | 18918707 | 18919626 | 920  | 268  | 20 | 34.02 | 5.34 | 48.52 |
| chr7 | 19439873 | 19441111 | 1239 | 428  | 28 | 45.21 | 5.34 | 49.15 |
| chr7 | 19800733 | 19802192 | 1460 | 1179 | 34 | 53.51 | 5.34 | 52.1  |
| chr7 | 20081088 | 20081973 | 886  | 368  | 27 | 59.56 | 7.61 | 55.22 |
| chr7 | 20179874 | 20180662 | 789  | 280  | 18 | 32.18 | 5.24 | 49.95 |
| chr7 | 20384993 | 20385835 | 843  | 357  | 21 | 43.29 | 6.16 | 47.94 |
| chr7 | 20439111 | 20440027 | 917  | 537  | 20 | 33.19 | 4.83 | 49.06 |
| chr7 | 20592036 | 20593182 | 1147 | 508  | 33 | 54.22 | 5.48 | 53.9  |
| chr7 | 20924987 | 20925736 | 750  | 271  | 17 | 31.07 | 4.52 | 50.77 |
| chr7 | 21248107 | 21248832 | 726  | 490  | 17 | 32.53 | 5.34 | 49.39 |
| chr7 | 21325690 | 21326911 | 1222 | 709  | 26 | 38.03 | 5.75 | 46.42 |
| chr7 | 21396636 | 21397533 | 898  | 684  | 21 | 38.57 | 4.83 | 46.21 |
| chr7 | 21489474 | 21490451 | 978  | 605  | 21 | 30.9  | 5.33 | 50.66 |
| chr7 | 21734863 | 21735657 | 795  | 243  | 18 | 32.73 | 4.52 | 49.31 |
| chr7 | 22121655 | 22123315 | 1661 | 951  | 37 | 39.2  | 4.45 | 46.34 |
| chr7 | 22182324 | 22183185 | 862  | 594  | 20 | 37.44 | 4.52 | 46.3  |
| chr7 | 22268448 | 22269935 | 1488 | 270  | 30 | 38.79 | 4.43 | 46.1  |
| chr7 | 22399326 | 22400698 | 1373 | 585  | 31 | 42.59 | 4.84 | 47.31 |
| chr7 | 22709793 | 22711016 | 1224 | 672  | 27 | 30.46 | 4.79 | 51.29 |
| chr7 | 22767642 | 22768578 | 937  | 539  | 23 | 41.67 | 6.16 | 47.25 |
| chr7 | 23143416 | 23146011 | 2596 | 1789 | 61 | 30.36 | 4.16 | 51.62 |
| chr7 | 23343831 | 23346360 | 2530 | 632  | 58 | 83.99 | 6.16 | 46.51 |
| chr7 | 23358133 | 23359189 | 1057 | 473  | 30 | 52.08 | 5.48 | 51.2  |
| chr7 | 23416055 | 23417768 | 1714 | 1129 | 37 | 31.03 | 5.07 | 50.48 |
| chr7 | 23511813 | 23514584 | 2772 | 603  | 71 | 38.67 | 3.35 | 46.18 |
| chr7 | 23642130 | 23643118 | 989  | 527  | 24 | 42.87 | 6.16 | 47.25 |
| chr7 | 24035212 | 24035957 | 746  | 472  | 20 | 45.47 | 6.98 | 49.85 |
| chr7 | 24176234 | 24177454 | 1221 | 769  | 24 | 30.57 | 5.34 | 51.24 |
| chr7 | 24401736 | 24402579 | 844  | 580  | 19 | 34.15 | 4.11 | 48    |
| chr7 | 24432459 | 24433068 | 610  | 332  | 16 | 35.69 | 5.75 | 47.22 |
| chr7 | 24755504 | 24756406 | 903  | 626  | 20 | 34.99 | 4.11 | 47.57 |
| chr7 | 25122260 | 25122960 | 701  | 424  | 17 | 34.14 | 4.93 | 48.03 |
| chr7 | 25751280 | 25752175 | 896  | 246  | 19 | 31.21 | 4.52 | 50.51 |
| chr7 | 27701461 | 27702892 | 1432 | 730  | 31 | 44.49 | 5.58 | 48.51 |
| chr7 | 27725840 | 27726893 | 1054 | 291  | 24 | 38.54 | 6.52 | 46.26 |
| chr7 | 27809670 | 27810675 | 1006 | 619  | 28 | 33.18 | 3.62 | 49.11 |
| chr7 | 28004712 | 28005681 | 970  | 318  | 21 | 35.38 | 4.52 | 47.52 |

|      |          |          |      |      |    |       |      |       |
|------|----------|----------|------|------|----|-------|------|-------|
| chr7 | 28499286 | 28500051 | 766  | 495  | 18 | 33.58 | 5.64 | 48.72 |
| chr7 | 28635380 | 28636261 | 882  | 610  | 19 | 31.98 | 4.11 | 49.78 |
| chr7 | 28666242 | 28666864 | 623  | 280  | 16 | 34.74 | 5.34 | 47.63 |
| chr7 | 28708981 | 28709807 | 827  | 275  | 19 | 30.86 | 5.65 | 50.94 |
| chr7 | 29154917 | 29155706 | 790  | 435  | 18 | 33.03 | 4.93 | 49.16 |
| chr7 | 29460093 | 29461626 | 1534 | 507  | 30 | 32.88 | 4.95 | 49.31 |
| chr7 | 29491784 | 29492705 | 922  | 244  | 20 | 33.9  | 4.52 | 48.66 |
| chr7 | 29586357 | 29587223 | 867  | 506  | 22 | 41.66 | 6.16 | 47.25 |
| chr7 | 30045546 | 30047115 | 1570 | 466  | 33 | 30.71 | 3.77 | 50.99 |
| chr7 | 30325432 | 30327865 | 2434 | 1053 | 51 | 30.44 | 3.81 | 51.31 |
| chr7 | 30585494 | 30586295 | 802  | 513  | 18 | 31.41 | 5.24 | 50.16 |
| chr7 | 30711249 | 30711982 | 734  | 488  | 19 | 41.38 | 5.34 | 46.91 |
| chr7 | 30984251 | 30985961 | 1711 | 1228 | 34 | 40.79 | 5.34 | 46.36 |
| chr7 | 32177042 | 32178027 | 986  | 520  | 20 | 30.51 | 4.11 | 51.28 |
| chr7 | 32197613 | 32198431 | 819  | 530  | 18 | 31.33 | 4.93 | 50.21 |
| chr7 | 32234943 | 32236077 | 1135 | 535  | 23 | 30.86 | 6.16 | 50.88 |
| chr7 | 32250564 | 32251403 | 840  | 582  | 18 | 30.16 | 4.52 | 51.72 |
| chr7 | 32652996 | 32654666 | 1671 | 564  | 31 | 35.59 | 4.93 | 47.14 |
| chr7 | 33276521 | 33277569 | 1049 | 458  | 24 | 34.79 | 4.95 | 47.61 |
| chr7 | 34477898 | 34479377 | 1480 | 1070 | 32 | 48.29 | 5.34 | 49.41 |
| chr7 | 34554494 | 34555360 | 867  | 421  | 19 | 32.82 | 4.52 | 49.42 |
| chr7 | 34576579 | 34578044 | 1466 | 639  | 32 | 49.04 | 6.16 | 50.49 |
| chr7 | 34630005 | 34630918 | 914  | 362  | 20 | 30.48 | 5.71 | 51.26 |
| chr7 | 34945071 | 34945823 | 753  | 377  | 20 | 44.93 | 5.34 | 48.8  |
| chr7 | 36218346 | 36219364 | 1019 | 664  | 21 | 32.35 | 4.89 | 49.89 |
| chr7 | 36298067 | 36300265 | 2199 | 1530 | 58 | 57.78 | 5.27 | 53.1  |
| chr7 | 36302517 | 36304320 | 1804 | 481  | 39 | 31.53 | 4.36 | 49.93 |
| chr7 | 36379595 | 36380642 | 1048 | 434  | 23 | 35.21 | 6.57 | 47.2  |
| chr7 | 36874344 | 36875245 | 902  | 392  | 20 | 35.04 | 5.34 | 47.43 |
| chr7 | 36955812 | 36957023 | 1212 | 638  | 34 | 39.33 | 5.99 | 46.63 |
| chr7 | 36981028 | 36981895 | 868  | 579  | 20 | 33.08 | 6.47 | 49.17 |
| chr7 | 37177421 | 37178698 | 1278 | 488  | 34 | 65.15 | 6.16 | 54.8  |
| chr7 | 37692963 | 37693803 | 841  | 595  | 19 | 34.33 | 4.93 | 47.74 |
| chr7 | 37741378 | 37743097 | 1720 | 827  | 42 | 44.56 | 4.05 | 48.82 |
| chr7 | 37819288 | 37820384 | 1097 | 280  | 24 | 36.62 | 4.93 | 46.95 |
| chr7 | 38105265 | 38106393 | 1129 | 839  | 23 | 30.12 | 4.43 | 51.62 |
| chr7 | 38180782 | 38181726 | 945  | 678  | 24 | 35.9  | 4.54 | 46.99 |
| chr7 | 38893674 | 38894472 | 799  | 549  | 19 | 34.77 | 4.72 | 47.61 |
| chr7 | 38996647 | 38997544 | 898  | 575  | 19 | 31.11 | 4.52 | 50.64 |
| chr7 | 39079724 | 39080738 | 1015 | 321  | 21 | 32.95 | 5.75 | 49.29 |
| chr7 | 39086533 | 39087448 | 916  | 637  | 21 | 38.54 | 5.34 | 46.22 |
| chr7 | 40046747 | 40049102 | 2356 | 1384 | 49 | 63.93 | 4.57 | 54    |
| chr7 | 40159529 | 40160556 | 1028 | 619  | 22 | 30.08 | 4.72 | 51.56 |
| chr7 | 40856745 | 40857666 | 922  | 403  | 21 | 38.17 | 5.34 | 46.27 |
| chr7 | 41107552 | 41108522 | 971  | 702  | 20 | 31.27 | 4.52 | 50.48 |
| chr7 | 41917947 | 41918817 | 871  | 273  | 21 | 37.09 | 4.95 | 46.95 |
| chr7 | 42272684 | 42273561 | 878  | 647  | 19 | 32.2  | 4.52 | 49.92 |
| chr7 | 42465235 | 42466061 | 827  | 287  | 19 | 35.17 | 4.93 | 47.09 |
| chr7 | 42676602 | 42677939 | 1338 | 633  | 26 | 32.5  | 6.16 | 49.38 |
| chr7 | 42847759 | 42848632 | 874  | 604  | 19 | 32.42 | 5.34 | 49.55 |
| chr7 | 43177314 | 43178063 | 750  | 420  | 18 | 35.53 | 5.34 | 47.2  |
| chr7 | 43511530 | 43512394 | 865  | 592  | 19 | 32.93 | 4.93 | 49.39 |

|      |          |          |      |      |     |       |      |       |
|------|----------|----------|------|------|-----|-------|------|-------|
| chr7 | 43946781 | 43947841 | 1061 | 663  | 29  | 39.42 | 4.28 | 47.09 |
| chr7 | 44104186 | 44105023 | 838  | 290  | 20  | 38.97 | 5.34 | 46.1  |
| chr7 | 44852311 | 44853840 | 1530 | 1080 | 45  | 95.74 | 8.63 | 30.77 |
| chr7 | 44871239 | 44872306 | 1068 | 719  | 26  | 45.52 | 5.24 | 50    |
| chr7 | 46425286 | 46426186 | 901  | 313  | 19  | 30.95 | 4.93 | 50.5  |
| chr7 | 46438615 | 46439581 | 967  | 557  | 21  | 35.55 | 6.98 | 47.19 |
| chr7 | 46532505 | 46533866 | 1362 | 403  | 29  | 40.41 | 4.78 | 46.82 |
| chr7 | 46822550 | 46823339 | 790  | 280  | 18  | 33.03 | 6.57 | 49.16 |
| chr7 | 47621936 | 47622820 | 885  | 605  | 20  | 33.82 | 3.94 | 48.81 |
| chr7 | 47810449 | 47811388 | 940  | 635  | 25  | 33.33 | 5.92 | 48.71 |
| chr7 | 48149135 | 48150178 | 1044 | 421  | 22  | 31.09 | 4.89 | 50.71 |
| chr7 | 48248454 | 48249202 | 749  | 237  | 17  | 31.13 | 4.11 | 50.63 |
| chr7 | 48300448 | 48301683 | 1236 | 709  | 32  | 63.35 | 7.8  | 55.24 |
| chr7 | 48956901 | 48957882 | 982  | 621  | 21  | 34.71 | 5.34 | 47.7  |
| chr7 | 49307358 | 49308183 | 826  | 569  | 20  | 39.75 | 6.98 | 46.7  |
| chr7 | 49360724 | 49361470 | 747  | 487  | 18  | 32.06 | 4.57 | 49.81 |
| chr7 | 50061757 | 50063412 | 1656 | 1008 | 42  | 68.25 | 6.85 | 54.07 |
| chr7 | 50069136 | 50070382 | 1247 | 447  | 33  | 56.03 | 6.09 | 53.79 |
| chr7 | 51272796 | 51273486 | 691  | 270  | 17  | 34.8  | 6.16 | 47.53 |
| chr7 | 51310285 | 51311631 | 1347 | 1068 | 33  | 55.98 | 5.75 | 53.65 |
| chr7 | 51402152 | 51403224 | 1073 | 554  | 21  | 30.07 | 5.75 | 51.46 |
| chr7 | 51769114 | 51769953 | 840  | 345  | 21  | 43.5  | 6.57 | 48.04 |
| chr7 | 53654241 | 53655066 | 826  | 589  | 18  | 30.94 | 4.11 | 50.56 |
| chr7 | 53737658 | 53738547 | 890  | 269  | 20  | 35.75 | 5.75 | 47.03 |
| chr7 | 55867867 | 55868928 | 1062 | 319  | 21  | 30.6  | 4.93 | 51.21 |
| chr7 | 56447969 | 56448871 | 903  | 611  | 22  | 39.34 | 4.52 | 46.61 |
| chr7 | 56648701 | 56649469 | 769  | 275  | 18  | 34.32 | 5.75 | 47.81 |
| chr7 | 57606006 | 57610532 | 4527 | 996  | 130 | 58.26 | 3.98 | 54    |
| chr7 | 57766093 | 57771672 | 5580 | 995  | 162 | 73.72 | 3.99 | 57.14 |
| chr7 | 57925451 | 57926739 | 1289 | 797  | 36  | 41.49 | 4.57 | 47.1  |
| chr7 | 57957827 | 57960266 | 2440 | 1911 | 53  | 46.88 | 4.28 | 47.52 |
| chr7 | 58019550 | 58022288 | 2739 | 1314 | 73  | 33.75 | 4.14 | 48.69 |
| chr7 | 61513003 | 61514590 | 1588 | 1086 | 32  | 33.78 | 4.71 | 48.67 |
| chr7 | 61542850 | 61547387 | 4538 | 3084 | 110 | 35.57 | 3.11 | 47.2  |
| chr7 | 61565411 | 61566527 | 1117 | 622  | 23  | 31.72 | 4.93 | 49.72 |
| chr7 | 62637858 | 62638694 | 837  | 565  | 19  | 34.57 | 6.57 | 47.74 |
| chr7 | 62820845 | 62822004 | 1160 | 586  | 25  | 37.29 | 6.57 | 46.71 |
| chr7 | 63879646 | 63880791 | 1146 | 467  | 26  | 37.26 | 5.33 | 46.53 |
| chr7 | 63999175 | 64000188 | 1014 | 405  | 25  | 43.02 | 6.3  | 47.59 |
| chr7 | 64570445 | 64571304 | 860  | 289  | 29  | 47.71 | 6.4  | 49.25 |
| chr7 | 65036191 | 65037215 | 1025 | 643  | 22  | 30.23 | 5.12 | 51.74 |
| chr7 | 65044033 | 65045156 | 1124 | 553  | 28  | 33.23 | 4.36 | 49.09 |
| chr7 | 65079624 | 65080796 | 1173 | 668  | 26  | 35.82 | 5.71 | 47.16 |
| chr7 | 65097901 | 65099426 | 1526 | 805  | 36  | 42.57 | 7.88 | 47.11 |
| chr7 | 66234966 | 66235979 | 1014 | 477  | 24  | 41.33 | 5.75 | 46.91 |
| chr7 | 67373163 | 67374080 | 918  | 627  | 19  | 30.05 | 5.75 | 51.47 |
| chr7 | 68783679 | 68784421 | 743  | 513  | 17  | 31.49 | 4.52 | 49.89 |
| chr7 | 69179948 | 69181057 | 1110 | 631  | 27  | 48.12 | 6.12 | 49.42 |
| chr7 | 69506850 | 69507797 | 948  | 624  | 20  | 32.48 | 4.11 | 49.47 |
| chr7 | 70078726 | 70080093 | 1368 | 653  | 33  | 38.91 | 4.36 | 46.3  |
| chr7 | 71896819 | 71897584 | 766  | 494  | 17  | 30.13 | 4.93 | 51.65 |
| chr7 | 72092560 | 72093997 | 1438 | 765  | 27  | 31.69 | 5.34 | 49.76 |

|      |          |          |      |      |    |       |      |       |
|------|----------|----------|------|------|----|-------|------|-------|
| chr7 | 72245010 | 72246199 | 1190 | 715  | 24 | 31.99 | 4.93 | 49.85 |
| chr7 | 72722642 | 72723768 | 1127 | 701  | 23 | 31.24 | 5.34 | 50.47 |
| chr7 | 73338046 | 73338794 | 749  | 474  | 18 | 31.94 | 5.71 | 49.75 |
| chr7 | 74137781 | 74139332 | 1552 | 1309 | 31 | 36.18 | 3.85 | 46.89 |
| chr7 | 74145014 | 74146323 | 1310 | 539  | 34 | 62.26 | 6.12 | 54.7  |
| chr7 | 75257846 | 75258452 | 607  | 325  | 19 | 47.61 | 6.09 | 49.17 |
| chr7 | 75729358 | 75730788 | 1431 | 603  | 29 | 39.14 | 6.16 | 46.27 |
| chr7 | 76285276 | 76286375 | 1100 | 541  | 23 | 32.54 | 5.34 | 49.35 |
| chr7 | 76796433 | 76797731 | 1299 | 735  | 28 | 36.8  | 6.47 | 46.79 |
| chr7 | 76806895 | 76808544 | 1650 | 1239 | 36 | 51.22 | 5.34 | 51.25 |
| chr7 | 76946119 | 76947676 | 1558 | 1281 | 31 | 34.71 | 3.97 | 47.7  |
| chr7 | 77565900 | 77567478 | 1579 | 752  | 37 | 34.37 | 4.28 | 47.84 |
| chr7 | 77886997 | 77887915 | 919  | 278  | 20 | 34.07 | 7.39 | 48.23 |
| chr7 | 79173497 | 79174154 | 658  | 375  | 17 | 37.11 | 6.16 | 46.96 |
| chr7 | 79181345 | 79182183 | 839  | 221  | 18 | 30.22 | 4.11 | 51.69 |
| chr7 | 79362829 | 79363719 | 891  | 537  | 24 | 38.17 | 5.48 | 46.23 |
| chr7 | 80302006 | 80303023 | 1018 | 483  | 22 | 32.8  | 5.75 | 49.43 |
| chr7 | 80589483 | 80590450 | 968  | 544  | 20 | 31.43 | 4.52 | 50.12 |
| chr7 | 80873859 | 80874708 | 850  | 405  | 19 | 33.8  | 4.52 | 48.83 |
| chr7 | 80914582 | 80916230 | 1649 | 1127 | 36 | 51.27 | 4.52 | 51.47 |
| chr7 | 81466691 | 81467592 | 902  | 274  | 19 | 30.89 | 4.52 | 50.73 |
| chr7 | 81747466 | 81749015 | 1550 | 503  | 33 | 44.67 | 4.11 | 48.84 |
| chr7 | 83029679 | 83030609 | 931  | 264  | 21 | 37.63 | 4.93 | 45.83 |
| chr7 | 83109912 | 83110700 | 789  | 533  | 20 | 42.29 | 5.34 | 47.36 |
| chr7 | 83206705 | 83207610 | 906  | 655  | 19 | 30.68 | 5.34 | 51.01 |
| chr7 | 83356759 | 83358144 | 1386 | 809  | 29 | 36.15 | 6.47 | 46.99 |
| chr7 | 83467241 | 83468046 | 806  | 556  | 21 | 41.46 | 4.19 | 47.02 |
| chr7 | 84029043 | 84030348 | 1306 | 710  | 29 | 45.59 | 5.75 | 50.26 |
| chr7 | 84415833 | 84416870 | 1038 | 415  | 27 | 53.46 | 6.98 | 51.82 |
| chr7 | 84795476 | 84797075 | 1600 | 680  | 32 | 42.25 | 4.52 | 47.13 |
| chr7 | 84857942 | 84858747 | 806  | 544  | 20 | 41.1  | 5.75 | 46.38 |
| chr7 | 85167206 | 85168155 | 950  | 683  | 21 | 36.52 | 4.93 | 46.93 |
| chr7 | 85583387 | 85583969 | 583  | 291  | 15 | 32.66 | 6.16 | 49.32 |
| chr7 | 85652201 | 85652997 | 797  | 270  | 18 | 32.61 | 4.52 | 49.4  |
| chr7 | 85794253 | 85795125 | 873  | 604  | 25 | 55.92 | 6.16 | 53.17 |
| chr7 | 86235459 | 86236375 | 917  | 620  | 20 | 30.31 | 4.19 | 51.55 |
| chr7 | 86457569 | 86458390 | 822  | 358  | 20 | 40.02 | 6.98 | 46.54 |
| chr7 | 86780948 | 86784347 | 3400 | 2164 | 78 | 36.83 | 3.62 | 46.89 |
| chr7 | 86963880 | 86964711 | 832  | 288  | 18 | 30.6  | 4.52 | 51.25 |
| chr7 | 87134786 | 87136772 | 1987 | 1225 | 39 | 46.22 | 6.57 | 48.62 |
| chr7 | 87276124 | 87277090 | 967  | 377  | 22 | 35.55 | 5.75 | 47.19 |
| chr7 | 87360947 | 87361976 | 1030 | 644  | 26 | 49.31 | 6.98 | 51.02 |
| chr7 | 87508921 | 87510896 | 1976 | 1703 | 42 | 30.88 | 4.12 | 50.82 |
| chr7 | 87642506 | 87644042 | 1537 | 971  | 32 | 45.32 | 4.52 | 49.28 |
| chr7 | 87715993 | 87716647 | 655  | 370  | 16 | 32.54 | 5.34 | 49.34 |
| chr7 | 88057471 | 88058201 | 731  | 442  | 18 | 36.8  | 5.34 | 46.81 |
| chr7 | 88456265 | 88457126 | 862  | 542  | 21 | 41.99 | 6.16 | 47.06 |
| chr7 | 88566139 | 88567334 | 1196 | 517  | 25 | 35.46 | 4.93 | 47.4  |
| chr7 | 89127698 | 89128526 | 829  | 330  | 18 | 30.77 | 5.34 | 50.95 |
| chr7 | 89264603 | 89265370 | 768  | 362  | 21 | 33.04 | 4.67 | 49.1  |
| chr7 | 89414562 | 89415434 | 873  | 592  | 19 | 32.48 | 4.93 | 49.44 |
| chr7 | 89471930 | 89472698 | 769  | 510  | 18 | 34.32 | 5.75 | 47.81 |

|      |           |           |      |      |    |       |      |       |
|------|-----------|-----------|------|------|----|-------|------|-------|
| chr7 | 89486937  | 89488244  | 1308 | 592  | 28 | 41.45 | 6.16 | 46.99 |
| chr7 | 89529340  | 89530593  | 1254 | 685  | 27 | 40.31 | 4.93 | 46.87 |
| chr7 | 89754537  | 89755412  | 876  | 340  | 19 | 32.31 | 6.57 | 50.09 |
| chr7 | 89965181  | 89966143  | 963  | 396  | 21 | 35.77 | 4.52 | 47.11 |
| chr7 | 89986683  | 89988034  | 1352 | 695  | 32 | 41.24 | 5.14 | 46.77 |
| chr7 | 90004275  | 90006014  | 1740 | 551  | 34 | 46.09 | 4.48 | 49.38 |
| chr7 | 90504315  | 90506110  | 1796 | 1514 | 43 | 41.51 | 4.71 | 47.2  |
| chr7 | 90507724  | 90508424  | 701  | 285  | 18 | 33.01 | 5.83 | 49.15 |
| chr7 | 90855473  | 90856296  | 824  | 282  | 22 | 44.63 | 6.16 | 48.91 |
| chr7 | 91095845  | 91097221  | 1377 | 1095 | 32 | 33.78 | 5.34 | 48.7  |
| chr7 | 91354474  | 91355517  | 1044 | 752  | 21 | 31.48 | 4.11 | 49.97 |
| chr7 | 91501741  | 91503494  | 1754 | 1338 | 36 | 38.84 | 5.26 | 46.24 |
| chr7 | 91568662  | 91570254  | 1593 | 366  | 40 | 30.02 | 3.64 | 51.48 |
| chr7 | 91804594  | 91805429  | 836  | 255  | 18 | 30.38 | 4.52 | 51.65 |
| chr7 | 91941045  | 91942979  | 1935 | 452  | 44 | 56.03 | 4.57 | 53.67 |
| chr7 | 92014047  | 92016678  | 2632 | 670  | 64 | 61.96 | 4.98 | 54.55 |
| chr7 | 92312186  | 92313077  | 892  | 638  | 21 | 40.03 | 5.75 | 46.56 |
| chr7 | 92403528  | 92404464  | 937  | 594  | 24 | 31.93 | 5.17 | 49.73 |
| chr7 | 92436794  | 92437664  | 871  | 343  | 21 | 41.4  | 6.16 | 47.03 |
| chr7 | 92466973  | 92468640  | 1668 | 630  | 33 | 30.31 | 3.81 | 51.55 |
| chr7 | 92546046  | 92546773  | 728  | 390  | 18 | 33.28 | 5.33 | 48.86 |
| chr7 | 92925726  | 92927609  | 1884 | 1384 | 44 | 50.24 | 5.59 | 51.64 |
| chr7 | 93004098  | 93005534  | 1437 | 1116 | 31 | 46.58 | 4.52 | 47.76 |
| chr7 | 93029401  | 93030053  | 653  | 366  | 16 | 32.67 | 5.34 | 49.42 |
| chr7 | 93097002  | 93097990  | 989  | 718  | 20 | 30.36 | 5.34 | 51.62 |
| chr7 | 93375393  | 93376028  | 636  | 349  | 16 | 32.47 | 5.18 | 49.48 |
| chr7 | 93481662  | 93482585  | 924  | 280  | 20 | 33.79 | 4.11 | 48.76 |
| chr7 | 93507162  | 93508422  | 1261 | 604  | 27 | 39.94 | 4.93 | 46.68 |
| chr7 | 93681456  | 93682302  | 847  | 586  | 19 | 33.98 | 5.75 | 48.64 |
| chr7 | 93774729  | 93775614  | 886  | 432  | 21 | 40.42 | 4.93 | 46.82 |
| chr7 | 94161339  | 94162359  | 1021 | 348  | 25 | 45.33 | 5.75 | 49.31 |
| chr7 | 94338955  | 94339882  | 928  | 281  | 20 | 33.57 | 4.52 | 48.57 |
| chr7 | 95468274  | 95469139  | 866  | 381  | 19 | 31.36 | 4.38 | 50.2  |
| chr7 | 95500230  | 95501405  | 1176 | 578  | 24 | 32.65 | 6.98 | 49.35 |
| chr7 | 95949725  | 95951758  | 2034 | 1529 | 49 | 39.21 | 4    | 46.32 |
| chr7 | 96097470  | 96098535  | 1066 | 501  | 22 | 30.4  | 6.16 | 51.46 |
| chr7 | 96611463  | 96612336  | 874  | 526  | 20 | 36.71 | 4.93 | 46.91 |
| chr7 | 96952587  | 96953608  | 1022 | 571  | 21 | 32.59 | 5.34 | 49.35 |
| chr7 | 97174320  | 97175154  | 835  | 463  | 18 | 30.44 | 4.52 | 51.32 |
| chr7 | 97294618  | 97296363  | 1746 | 265  | 36 | 46.43 | 4.93 | 48.35 |
| chr7 | 97680223  | 97681171  | 949  | 672  | 21 | 32.47 | 6.47 | 49.48 |
| chr7 | 98252141  | 98253999  | 1859 | 463  | 32 | 34.69 | 5.34 | 47.79 |
| chr7 | 99158140  | 99159346  | 1207 | 763  | 30 | 33.67 | 4.55 | 48.67 |
| chr7 | 99214226  | 99215342  | 1117 | 635  | 23 | 31.72 | 5.75 | 49.72 |
| chr7 | 99676565  | 99678171  | 1607 | 801  | 35 | 39.9  | 5.83 | 46.6  |
| chr7 | 99678558  | 99680504  | 1947 | 1491 | 50 | 38.56 | 3.42 | 46.27 |
| chr7 | 100035015 | 100036405 | 1391 | 758  | 31 | 35.7  | 4.79 | 47.2  |
| chr7 | 100701655 | 100702247 | 593  | 274  | 17 | 42.17 | 6.16 | 47.04 |
| chr7 | 100878575 | 100879498 | 924  | 256  | 21 | 38.05 | 6.16 | 46.4  |
| chr7 | 101523342 | 101525356 | 2015 | 1387 | 41 | 30.68 | 4.16 | 50.97 |
| chr7 | 102352678 | 102353653 | 976  | 378  | 22 | 32.77 | 5.12 | 49.44 |
| chr7 | 102741230 | 102741939 | 710  | 434  | 19 | 39.09 | 4.57 | 46.36 |

|      |           |           |      |      |    |       |      |       |
|------|-----------|-----------|------|------|----|-------|------|-------|
| chr7 | 103181993 | 103183147 | 1155 | 493  | 24 | 33.66 | 5.75 | 48.63 |
| chr7 | 103821404 | 103822485 | 1082 | 406  | 24 | 33.03 | 4.19 | 49.16 |
| chr7 | 103837035 | 103838435 | 1401 | 981  | 33 | 46.58 | 5.33 | 47.8  |
| chr7 | 104132261 | 104133046 | 786  | 244  | 18 | 33.27 | 4.11 | 48.88 |
| chr7 | 104192343 | 104192982 | 640  | 414  | 16 | 33.55 | 5.75 | 48.55 |
| chr7 | 105198509 | 105199499 | 991  | 536  | 22 | 34.22 | 6.98 | 47.93 |
| chr7 | 105720381 | 105721694 | 1314 | 563  | 33 | 33.28 | 3.57 | 48.93 |
| chr7 | 105843013 | 105844650 | 1638 | 239  | 31 | 36.97 | 3.7  | 46.98 |
| chr7 | 106112409 | 106113706 | 1298 | 623  | 28 | 41.46 | 5.71 | 47.02 |
| chr7 | 106234993 | 106235996 | 1004 | 432  | 23 | 37.64 | 4.93 | 45.87 |
| chr7 | 106351201 | 106352051 | 851  | 264  | 19 | 30.02 | 4.95 | 51.51 |
| chr7 | 106407748 | 106408700 | 953  | 279  | 20 | 32.21 | 4.93 | 49.97 |
| chr7 | 106476651 | 106477668 | 1018 | 731  | 25 | 32.52 | 5.32 | 49.39 |
| chr7 | 106723846 | 106724792 | 947  | 596  | 22 | 36.69 | 6.98 | 46.9  |
| chr7 | 106825176 | 106826202 | 1027 | 328  | 26 | 35.11 | 4.61 | 47.41 |
| chr7 | 107365250 | 107366152 | 903  | 301  | 19 | 30.84 | 4.93 | 50.85 |
| chr7 | 108253229 | 108254634 | 1406 | 547  | 30 | 41.15 | 5.51 | 46.41 |
| chr7 | 108288511 | 108290076 | 1566 | 1033 | 33 | 47.73 | 4.93 | 49.16 |
| chr7 | 108299654 | 108300393 | 740  | 359  | 19 | 39.31 | 5.18 | 46.54 |
| chr7 | 108373669 | 108374526 | 858  | 571  | 20 | 37.69 | 4.11 | 46.5  |
| chr7 | 108757190 | 108757710 | 521  | 260  | 16 | 48.45 | 6.57 | 49.14 |
| chr7 | 108988329 | 108989231 | 903  | 285  | 21 | 39.34 | 4.52 | 46.61 |
| chr7 | 109707705 | 109709188 | 1484 | 291  | 31 | 44.14 | 4.93 | 48.01 |
| chr7 | 109737977 | 109739273 | 1297 | 603  | 25 | 30.77 | 6.57 | 50.99 |
| chr7 | 110104568 | 110106355 | 1788 | 464  | 35 | 40.92 | 4.52 | 46.46 |
| chr7 | 110759431 | 110760350 | 920  | 522  | 23 | 41.62 | 4.83 | 47.13 |
| chr7 | 110869226 | 110870036 | 811  | 287  | 18 | 31.79 | 5.34 | 49.76 |
| chr7 | 110934828 | 110935900 | 1073 | 730  | 22 | 30.07 | 5.34 | 51.46 |
| chr7 | 111069746 | 111070696 | 951  | 378  | 24 | 44.76 | 5.29 | 48.86 |
| chr7 | 111137885 | 111138696 | 812  | 540  | 21 | 45.5  | 4.93 | 49.85 |
| chr7 | 111215101 | 111216335 | 1235 | 495  | 28 | 33.3  | 4.45 | 48.83 |
| chr7 | 111633709 | 111634582 | 874  | 288  | 20 | 36.71 | 5.75 | 46.91 |
| chr7 | 111666287 | 111666979 | 693  | 248  | 17 | 34.67 | 4.52 | 47.75 |
| chr7 | 111851409 | 111852471 | 1063 | 776  | 21 | 30.55 | 4.52 | 51.18 |
| chr7 | 112415050 | 112416346 | 1297 | 668  | 26 | 34.36 | 5.75 | 47.85 |
| chr7 | 112417967 | 112418664 | 698  | 430  | 17 | 34.34 | 6.16 | 47.84 |
| chr7 | 112435198 | 112436189 | 992  | 605  | 20 | 30.21 | 5.34 | 51.73 |
| chr7 | 112486683 | 112488169 | 1487 | 1206 | 32 | 36.52 | 3.88 | 46.93 |
| chr7 | 112579367 | 112582537 | 3171 | 2401 | 81 | 52.91 | 4.14 | 50.57 |
| chr7 | 112734093 | 112735995 | 1903 | 1444 | 44 | 64.85 | 6.92 | 53.76 |
| chr7 | 113260531 | 113262303 | 1773 | 1485 | 36 | 47.61 | 4.86 | 48.94 |
| chr7 | 113775089 | 113775988 | 900  | 447  | 19 | 31    | 5.34 | 50.47 |
| chr7 | 113991048 | 113992101 | 1054 | 385  | 21 | 30.98 | 5.75 | 50.46 |
| chr7 | 114575905 | 114576725 | 821  | 563  | 20 | 35.97 | 5.33 | 47.04 |
| chr7 | 115039315 | 115040150 | 836  | 577  | 20 | 35.02 | 4.57 | 47.52 |
| chr7 | 115404741 | 115405560 | 820  | 283  | 19 | 35.61 | 4.93 | 47.29 |
| chr7 | 115447981 | 115449316 | 1336 | 589  | 27 | 36.22 | 5.75 | 46.98 |
| chr7 | 115943331 | 115944858 | 1528 | 554  | 32 | 32.52 | 3.77 | 49.39 |
| chr7 | 116205910 | 116207720 | 1811 | 1101 | 42 | 62.39 | 6.69 | 55.22 |
| chr7 | 116245535 | 116246788 | 1254 | 596  | 29 | 30.86 | 4.76 | 50.87 |
| chr7 | 116443789 | 116445015 | 1227 | 509  | 28 | 33.71 | 5.48 | 48.62 |
| chr7 | 116641369 | 116642575 | 1207 | 666  | 30 | 55.96 | 6.98 | 53.53 |



|      |           |           |      |      |    |       |      |       |
|------|-----------|-----------|------|------|----|-------|------|-------|
| chr7 | 116803234 | 116803850 | 617  | 331  | 17 | 40.21 | 6.57 | 46.7  |
| chr7 | 116991995 | 116992860 | 866  | 275  | 19 | 32.88 | 5.75 | 49.29 |
| chr7 | 117001725 | 117002689 | 965  | 579  | 21 | 31.02 | 7.15 | 50.51 |
| chr7 | 117133492 | 117134965 | 1474 | 595  | 30 | 35.52 | 3.81 | 47.24 |
| chr7 | 117243320 | 117244496 | 1177 | 617  | 27 | 44.57 | 4.93 | 48.85 |
| chr7 | 117694864 | 117695689 | 826  | 563  | 22 | 34.24 | 4.11 | 47.89 |
| chr7 | 117871363 | 117872341 | 979  | 290  | 21 | 34.88 | 4.93 | 47.64 |
| chr7 | 118118679 | 118119638 | 960  | 488  | 25 | 49.4  | 6.98 | 51.43 |
| chr7 | 118307745 | 118308758 | 1014 | 270  | 24 | 38.08 | 5.06 | 46.41 |
| chr7 | 118446053 | 118447232 | 1180 | 786  | 32 | 44.33 | 5.6  | 48.28 |
| chr7 | 118803856 | 118805068 | 1213 | 555  | 25 | 34.62 | 6.57 | 47.82 |
| chr7 | 118847528 | 118848211 | 684  | 271  | 18 | 40.13 | 5.75 | 46.69 |
| chr7 | 119079927 | 119080612 | 686  | 266  | 17 | 34.24 | 6.04 | 47.89 |
| chr7 | 119157946 | 119158985 | 1040 | 482  | 25 | 44.13 | 5.75 | 47.92 |
| chr7 | 119311745 | 119312825 | 1081 | 384  | 24 | 33.08 | 5.71 | 49.19 |
| chr7 | 119553598 | 119554356 | 759  | 427  | 21 | 49.56 | 5.34 | 51.23 |
| chr7 | 119933985 | 119935057 | 1073 | 783  | 23 | 33.9  | 5.75 | 48.62 |
| chr7 | 120161848 | 120162764 | 917  | 284  | 19 | 30.1  | 5.34 | 51.55 |
| chr7 | 120548482 | 120549404 | 923  | 463  | 20 | 33.85 | 4.52 | 48.75 |
| chr7 | 120581384 | 120582773 | 1390 | 888  | 31 | 41.69 | 4.47 | 47.22 |
| chr7 | 120679701 | 120680476 | 776  | 195  | 19 | 38.44 | 4.93 | 46.41 |
| chr7 | 120685401 | 120686373 | 973  | 404  | 20 | 31.17 | 4.11 | 50.55 |
| chr7 | 121651369 | 121653038 | 1670 | 1105 | 38 | 58.22 | 5.34 | 54.26 |
| chr7 | 122820095 | 122821107 | 1013 | 275  | 25 | 45.84 | 6.98 | 50.04 |
| chr7 | 123041103 | 123041904 | 802  | 528  | 19 | 36.74 | 5.34 | 46.95 |
| chr7 | 123072453 | 123073365 | 913  | 657  | 19 | 30.31 | 4.11 | 51.54 |
| chr7 | 123217687 | 123218568 | 882  | 256  | 19 | 31.98 | 5.34 | 49.78 |
| chr7 | 123841629 | 123842376 | 748  | 432  | 17 | 31.19 | 4.11 | 50.55 |
| chr7 | 124449222 | 124450305 | 1084 | 291  | 24 | 32.93 | 4.57 | 49.33 |
| chr7 | 125101657 | 125102617 | 961  | 609  | 20 | 31.79 | 4.93 | 49.8  |
| chr7 | 125150872 | 125152110 | 1239 | 530  | 25 | 33.38 | 4.52 | 48.69 |
| chr7 | 125186585 | 125187810 | 1226 | 569  | 33 | 64.06 | 8.63 | 54.08 |
| chr7 | 125218355 | 125219170 | 816  | 537  | 20 | 40.42 | 6.98 | 46.89 |
| chr7 | 125424065 | 125425023 | 959  | 286  | 20 | 31.9  | 4.93 | 49.83 |
| chr7 | 125600407 | 125601628 | 1222 | 641  | 24 | 30.53 | 5.34 | 51.25 |
| chr7 | 125761693 | 125763455 | 1763 | 1335 | 34 | 36.27 | 4.78 | 46.91 |
| chr7 | 125901934 | 125903536 | 1603 | 289  | 39 | 66.49 | 5.34 | 55.13 |
| chr7 | 126445320 | 126446225 | 906  | 510  | 24 | 48.43 | 5.75 | 49.19 |
| chr7 | 126590923 | 126591798 | 876  | 254  | 20 | 36.58 | 6.16 | 46.91 |
| chr7 | 126704897 | 126705701 | 805  | 518  | 20 | 41.17 | 5.34 | 46.48 |
| chr7 | 126713673 | 126714451 | 779  | 367  | 18 | 33.7  | 5.75 | 48.57 |
| chr7 | 127225208 | 127226612 | 1405 | 728  | 38 | 41.3  | 4.85 | 46.96 |
| chr7 | 127862552 | 127864399 | 1848 | 461  | 38 | 36.38 | 5.3  | 47.21 |
| chr7 | 128621410 | 128623488 | 2079 | 1088 | 45 | 37.96 | 4.24 | 46.51 |
| chr7 | 128714277 | 128715659 | 1383 | 978  | 36 | 50.76 | 5.14 | 51.73 |
| chr7 | 128723267 | 128724208 | 942  | 401  | 20 | 32.8  | 6.57 | 49.45 |
| chr7 | 128845891 | 128846574 | 684  | 262  | 18 | 35.23 | 4.84 | 47.22 |
| chr7 | 128959538 | 128960353 | 816  | 280  | 18 | 31.51 | 5.34 | 49.84 |
| chr7 | 129057375 | 129057989 | 615  | 272  | 16 | 35.32 | 6.16 | 47.43 |
| chr7 | 129585089 | 129586279 | 1191 | 742  | 29 | 34.13 | 4.44 | 48.07 |
| chr7 | 130269536 | 130270361 | 826  | 537  | 20 | 39.75 | 6.16 | 46.7  |
| chr7 | 130723780 | 130725072 | 1293 | 734  | 27 | 35.6  | 5.12 | 47.19 |

|      |           |           |      |      |    |       |      |       |
|------|-----------|-----------|------|------|----|-------|------|-------|
| chr7 | 131057596 | 131059030 | 1435 | 1030 | 33 | 50.76 | 5.75 | 51.6  |
| chr7 | 131086738 | 131087661 | 924  | 657  | 23 | 33.24 | 6.29 | 49.06 |
| chr7 | 131169645 | 131171142 | 1498 | 1157 | 33 | 31.86 | 4.65 | 49.73 |
| chr7 | 131706250 | 131707241 | 992  | 532  | 24 | 42.68 | 6.16 | 47.4  |
| chr7 | 132437231 | 132437910 | 680  | 391  | 16 | 30.92 | 5.34 | 50.56 |
| chr7 | 132515174 | 132515971 | 798  | 552  | 18 | 30.56 | 3.94 | 51.25 |
| chr7 | 132956935 | 132958516 | 1582 | 994  | 35 | 34.26 | 3.99 | 47.88 |
| chr7 | 133441550 | 133442421 | 872  | 597  | 21 | 41.33 | 4.52 | 46.82 |
| chr7 | 133498427 | 133499209 | 783  | 259  | 18 | 33.46 | 5.75 | 48.67 |
| chr7 | 133856509 | 133857373 | 865  | 580  | 19 | 32.93 | 4.93 | 49.39 |
| chr7 | 133873583 | 133874495 | 913  | 692  | 20 | 34.41 | 4.93 | 47.76 |
| chr7 | 134308253 | 134309166 | 914  | 677  | 19 | 30.26 | 4.52 | 51.67 |
| chr7 | 134584764 | 134585650 | 887  | 374  | 22 | 40.35 | 5.34 | 46.88 |
| chr7 | 134730033 | 134731279 | 1247 | 541  | 26 | 32.81 | 7.7  | 49.4  |
| chr7 | 135093601 | 135095054 | 1454 | 748  | 33 | 43.71 | 6.09 | 47.9  |
| chr7 | 135195457 | 135197876 | 2420 | 1297 | 65 | 74.97 | 4.71 | 57.69 |
| chr7 | 135739423 | 135741005 | 1583 | 1252 | 34 | 46.86 | 4.11 | 47.2  |
| chr7 | 135910815 | 135911789 | 975  | 326  | 21 | 35.1  | 4.52 | 47.34 |
| chr7 | 136742330 | 136743266 | 937  | 289  | 21 | 37.27 | 5.34 | 46.57 |
| chr7 | 136969324 | 136970521 | 1198 | 547  | 25 | 35.36 | 5.75 | 47.48 |
| chr7 | 136979976 | 136980627 | 652  | 287  | 16 | 32.74 | 4.93 | 49.34 |
| chr7 | 137481985 | 137482826 | 842  | 257  | 20 | 38.71 | 4.93 | 46.22 |
| chr7 | 137554684 | 137555602 | 919  | 279  | 20 | 30.21 | 4.57 | 51.75 |
| chr7 | 137849581 | 137850777 | 1197 | 564  | 24 | 31.66 | 5.34 | 49.84 |
| chr7 | 138155806 | 138156797 | 992  | 434  | 20 | 30.21 | 5.75 | 51.73 |
| chr7 | 138852747 | 138854175 | 1429 | 290  | 31 | 43.78 | 4.33 | 47.79 |
| chr7 | 140097661 | 140098582 | 922  | 400  | 22 | 32.83 | 4.47 | 49.41 |
| chr7 | 140490900 | 140493184 | 2285 | 1785 | 59 | 32.73 | 3.31 | 49.33 |
| chr7 | 141062892 | 141064379 | 1488 | 729  | 33 | 47.86 | 6.16 | 49.19 |
| chr7 | 141430893 | 141432141 | 1249 | 712  | 25 | 32.92 | 6.98 | 49.3  |
| chr7 | 141495928 | 141497131 | 1204 | 484  | 24 | 31.34 | 5.34 | 50.18 |
| chr7 | 141593530 | 141594184 | 655  | 251  | 17 | 37.32 | 5.75 | 46.67 |
| chr7 | 141844896 | 141846477 | 1582 | 1028 | 31 | 39.44 | 4.93 | 47.06 |
| chr7 | 142172010 | 142172830 | 821  | 401  | 20 | 40.09 | 6.16 | 46.58 |
| chr7 | 142200656 | 142202075 | 1420 | 667  | 28 | 35.98 | 5.34 | 47.06 |
| chr7 | 142420050 | 142421679 | 1630 | 1042 | 33 | 35.33 | 5.71 | 47.48 |
| chr7 | 142525096 | 142526538 | 1443 | 927  | 31 | 33.2  | 4.11 | 49.14 |
| chr7 | 142622120 | 142623240 | 1121 | 290  | 24 | 35.37 | 4.93 | 47.53 |
| chr7 | 143220601 | 143222471 | 1871 | 1327 | 52 | 40.74 | 4.16 | 46.63 |
| chr7 | 143282183 | 143283822 | 1640 | 990  | 34 | 30.78 | 3.77 | 50.99 |
| chr7 | 143290145 | 143291535 | 1391 | 736  | 42 | 48.75 | 4.48 | 50.47 |
| chr7 | 143476456 | 143478866 | 2411 | 1221 | 49 | 31.75 | 3.42 | 49.83 |
| chr7 | 143883452 | 143884184 | 733  | 392  | 18 | 32.96 | 5.33 | 49.27 |
| chr7 | 144133166 | 144134143 | 978  | 284  | 20 | 30.91 | 4.11 | 50.61 |
| chr7 | 144179824 | 144180983 | 1160 | 711  | 24 | 33.41 | 4.93 | 48.7  |
| chr7 | 145014662 | 145015565 | 904  | 587  | 19 | 30.79 | 4.52 | 50.91 |
| chr7 | 145746067 | 145746726 | 660  | 349  | 16 | 32.21 | 5.75 | 49.94 |
| chr7 | 146285523 | 146286462 | 940  | 284  | 21 | 37.1  | 4.52 | 46.88 |
| chr7 | 146322745 | 146323939 | 1195 | 541  | 24 | 31.75 | 6.16 | 49.81 |
| chr7 | 146468202 | 146469243 | 1042 | 379  | 21 | 31.58 | 6.57 | 49.97 |
| chr7 | 147062632 | 147063621 | 990  | 717  | 21 | 34.28 | 4.93 | 47.79 |
| chr7 | 147276203 | 147277242 | 1040 | 783  | 24 | 39.79 | 5.34 | 46.64 |

|      |           |           |      |      |     |       |        |       |
|------|-----------|-----------|------|------|-----|-------|--------|-------|
| chr7 | 147705869 | 147708066 | 2198 | 1704 | 46  | 40.27 | 4.11   | 46.85 |
| chr7 | 148000281 | 148001660 | 1380 | 1031 | 32  | 44.21 | 5.82   | 48.17 |
| chr7 | 148379747 | 148381311 | 1565 | 1299 | 32  | 30.92 | 4.11   | 50.59 |
| chr7 | 148577572 | 148578934 | 1363 | 703  | 33  | 30.81 | 5.06   | 50.96 |
| chr7 | 148716924 | 148717948 | 1025 | 398  | 21  | 31.43 | 5.24   | 50.07 |
| chr7 | 148971461 | 148972370 | 910  | 244  | 22  | 38.91 | 4.93   | 46.27 |
| chr7 | 149366801 | 149367959 | 1159 | 525  | 26  | 30.28 | 4.79   | 51.67 |
| chr7 | 150262979 | 150264048 | 1070 | 513  | 27  | 51.26 | 5.75   | 51.32 |
| chr7 | 150353306 | 150354258 | 953  | 385  | 21  | 36.34 | 5.34   | 47.04 |
| chr7 | 151022761 | 151023729 | 969  | 555  | 20  | 31.37 | 4.52   | 50.25 |
| chr7 | 151179626 | 151180581 | 956  | 559  | 20  | 32.05 | 5.34   | 49.81 |
| chr7 | 151317012 | 151317736 | 725  | 289  | 17  | 32.26 | 6.12   | 50.03 |
| chr7 | 151820098 | 151821076 | 979  | 282  | 22  | 34.88 | 5.34   | 47.64 |
| chr7 | 151955479 | 151956285 | 807  | 555  | 19  | 34.85 | 5.58   | 47.58 |
| chr7 | 153258425 | 153259303 | 879  | 527  | 19  | 32.14 | 4.52   | 49.88 |
| chr7 | 153929272 | 153930315 | 1044 | 451  | 21  | 31.48 | 5.34   | 49.97 |
| chr7 | 154458232 | 154459062 | 831  | 571  | 18  | 30.66 | 4.93   | 51.04 |
| chr7 | 155034163 | 155035297 | 1135 | 289  | 24  | 34.65 | 4.52   | 47.66 |
| chr7 | 156357555 | 156358549 | 995  | 574  | 22  | 34.01 | 4.93   | 48.54 |
| chr7 | 156387814 | 156388781 | 968  | 550  | 20  | 31.43 | 6.16   | 50.12 |
| chr7 | 156972120 | 156973217 | 1098 | 549  | 24  | 36.57 | 6.57   | 46.88 |
| chr7 | 157173804 | 157174657 | 854  | 504  | 19  | 32.04 | 3.98   | 49.76 |
| chr7 | 157253439 | 157254646 | 1208 | 683  | 436 | 3100  | 166.35 | 0     |
| chr7 | 157416289 | 157416905 | 617  | 283  | 17  | 40.21 | 6.16   | 46.7  |
| chr7 | 158678343 | 158679349 | 1007 | 645  | 22  | 33.37 | 6.57   | 48.68 |
| chr7 | 159124352 | 159125431 | 1080 | 689  | 23  | 33.55 | 4.93   | 48.64 |
| chr8 | 161142    | 162168    | 1027 | 428  | 21  | 32.33 | 4.93   | 49.98 |
| chr8 | 166203    | 167410    | 1208 | 574  | 28  | 41.66 | 6.47   | 47.19 |
| chr8 | 181189    | 182458    | 1270 | 748  | 28  | 35.12 | 6.16   | 47.38 |
| chr8 | 482940    | 484652    | 1713 | 1271 | 33  | 40.7  | 3.7    | 46.5  |
| chr8 | 496979    | 497830    | 852  | 272  | 19  | 33.68 | 4.93   | 48.55 |
| chr8 | 719866    | 720891    | 1026 | 408  | 22  | 32.38 | 6.16   | 49.71 |
| chr8 | 1403109   | 1404033   | 925  | 393  | 21  | 37.99 | 5.75   | 46.41 |
| chr8 | 2574631   | 2575813   | 1183 | 453  | 31  | 45.29 | 5.98   | 49.32 |
| chr8 | 3409019   | 3409951   | 933  | 647  | 21  | 37.51 | 4.11   | 46.02 |
| chr8 | 4399977   | 4400795   | 819  | 558  | 19  | 31.86 | 4.95   | 49.73 |
| chr8 | 4974553   | 4975736   | 1184 | 896  | 30  | 51.45 | 5.33   | 51.85 |
| chr8 | 5214887   | 5215670   | 784  | 503  | 18  | 33.39 | 4.93   | 48.71 |
| chr8 | 5360147   | 5360976   | 830  | 275  | 18  | 30.71 | 4.11   | 50.99 |
| chr8 | 5595378   | 5596300   | 923  | 633  | 21  | 38.11 | 4.52   | 46.34 |
| chr8 | 6152248   | 6153547   | 1300 | 695  | 28  | 36.75 | 4.19   | 46.96 |
| chr8 | 6348220   | 6349995   | 1776 | 436  | 36  | 45.02 | 5.75   | 49.06 |
| chr8 | 6697047   | 6698863   | 1817 | 1228 | 37  | 46.76 | 5.75   | 47.47 |
| chr8 | 7395496   | 7396374   | 879  | 591  | 21  | 36.58 | 6.09   | 46.89 |
| chr8 | 8161022   | 8161577   | 556  | 278  | 15  | 37.66 | 6.16   | 46.06 |
| chr8 | 8591362   | 8592812   | 1451 | 821  | 35  | 42.25 | 4.07   | 47.2  |
| chr8 | 8680932   | 8683017   | 2086 | 1562 | 50  | 37.28 | 3.9    | 46.7  |
| chr8 | 8750910   | 8752237   | 1328 | 541  | 32  | 42.59 | 5.14   | 47.28 |
| chr8 | 8820615   | 8821820   | 1206 | 633  | 25  | 34.97 | 5.75   | 47.66 |
| chr8 | 9508783   | 9510221   | 1439 | 581  | 31  | 32.72 | 3.39   | 49.38 |
| chr8 | 9562346   | 9564263   | 1918 | 275  | 54  | 48.49 | 4.2    | 49.44 |
| chr8 | 10977432  | 10978805  | 1374 | 634  | 27  | 30.52 | 5.77   | 51.31 |

|      |          |          |      |      |    |       |      |       |
|------|----------|----------|------|------|----|-------|------|-------|
| chr8 | 11038343 | 11038892 | 550  | 275  | 15 | 37.66 | 6.16 | 46.06 |
| chr8 | 11223556 | 11224336 | 781  | 372  | 18 | 33.58 | 6.16 | 48.63 |
| chr8 | 11241871 | 11242727 | 857  | 570  | 20 | 37.76 | 5.34 | 46.7  |
| chr8 | 11377075 | 11378711 | 1637 | 1317 | 38 | 45.7  | 4.91 | 49.7  |
| chr8 | 11546346 | 11547179 | 834  | 547  | 18 | 30.49 | 4.93 | 51.26 |
| chr8 | 12050110 | 12051045 | 936  | 438  | 24 | 40.21 | 6.33 | 46.74 |
| chr8 | 12600840 | 12603864 | 3025 | 1045 | 61 | 66.38 | 3.98 | 53.99 |
| chr8 | 13311242 | 13312055 | 814  | 435  | 20 | 40.56 | 5.75 | 46.89 |
| chr8 | 14091387 | 14092374 | 988  | 576  | 20 | 30.41 | 4.11 | 51.4  |
| chr8 | 14189478 | 14190273 | 796  | 272  | 18 | 32.67 | 4.52 | 49.34 |
| chr8 | 14282411 | 14283503 | 1093 | 575  | 23 | 32.89 | 4.52 | 49.36 |
| chr8 | 14555492 | 14556750 | 1259 | 514  | 26 | 36.17 | 6.57 | 46.93 |
| chr8 | 14770163 | 14771078 | 916  | 522  | 22 | 38.54 | 4.93 | 46.22 |
| chr8 | 15235161 | 15235939 | 779  | 286  | 18 | 33.7  | 5.34 | 48.57 |
| chr8 | 15521820 | 15522875 | 1056 | 667  | 23 | 34.79 | 4.52 | 47.62 |
| chr8 | 15738524 | 15739411 | 888  | 306  | 19 | 31.65 | 4.93 | 49.86 |
| chr8 | 16399571 | 16400246 | 676  | 345  | 16 | 31.17 | 4.93 | 50.55 |
| chr8 | 16785128 | 16786116 | 989  | 716  | 21 | 34.33 | 4.52 | 47.78 |
| chr8 | 16873315 | 16874583 | 1269 | 661  | 29 | 42.18 | 6.47 | 47.1  |
| chr8 | 17098653 | 17099818 | 1166 | 569  | 27 | 45.21 | 6.57 | 49.18 |
| chr8 | 17636829 | 17637671 | 843  | 569  | 19 | 34.21 | 4.52 | 47.87 |
| chr8 | 18300411 | 18301251 | 841  | 492  | 18 | 30.11 | 4.93 | 51.58 |
| chr8 | 18502825 | 18503622 | 798  | 427  | 19 | 37    | 5.75 | 46.97 |
| chr8 | 18551780 | 18552620 | 841  | 384  | 20 | 38.77 | 4.93 | 46.03 |
| chr8 | 18588604 | 18590026 | 1423 | 1151 | 31 | 47.33 | 4.52 | 48.22 |
| chr8 | 18683342 | 18684775 | 1434 | 919  | 30 | 42.8  | 5.34 | 47.4  |
| chr8 | 19245909 | 19246683 | 775  | 513  | 20 | 43.3  | 5.75 | 48.08 |
| chr8 | 19657423 | 19658655 | 1233 | 689  | 24 | 30.04 | 5.75 | 51.46 |
| chr8 | 19819003 | 19819839 | 837  | 597  | 20 | 34.96 | 4.95 | 47.7  |
| chr8 | 19840446 | 19841685 | 1240 | 625  | 29 | 49.41 | 5.34 | 51.55 |
| chr8 | 19989153 | 19990885 | 1733 | 1148 | 33 | 36.4  | 4.93 | 47.14 |
| chr8 | 20074809 | 20076136 | 1328 | 535  | 27 | 36.6  | 5.34 | 46.9  |
| chr8 | 21157223 | 21158017 | 795  | 412  | 21 | 42.25 | 5.33 | 47.15 |
| chr8 | 21994774 | 21995907 | 1134 | 832  | 33 | 55.17 | 5.14 | 53.26 |
| chr8 | 22101727 | 22103511 | 1785 | 1161 | 39 | 32.33 | 4.05 | 50    |
| chr8 | 22286695 | 22287937 | 1243 | 641  | 29 | 30.27 | 3.74 | 51.65 |
| chr8 | 22356673 | 22357443 | 771  | 412  | 19 | 38.78 | 5.34 | 46.03 |
| chr8 | 22743359 | 22744294 | 936  | 697  | 21 | 33.19 | 4.57 | 49.08 |
| chr8 | 23467838 | 23468696 | 859  | 662  | 19 | 33.28 | 4.52 | 48.91 |
| chr8 | 23768555 | 23770182 | 1628 | 1123 | 31 | 40.95 | 4.52 | 46.35 |
| chr8 | 23939011 | 23940066 | 1056 | 272  | 23 | 33.08 | 4.78 | 49.17 |
| chr8 | 23950314 | 23951190 | 877  | 439  | 19 | 32.26 | 5.75 | 49.99 |
| chr8 | 24572524 | 24573492 | 969  | 276  | 20 | 31.37 | 4.93 | 50.25 |
| chr8 | 25329653 | 25331156 | 1504 | 263  | 33 | 33.6  | 3.77 | 48.7  |
| chr8 | 25586770 | 25587960 | 1191 | 595  | 25 | 31.27 | 4.57 | 50.47 |
| chr8 | 25616523 | 25617674 | 1152 | 613  | 23 | 30.08 | 4.93 | 51.53 |
| chr8 | 25959349 | 25959999 | 651  | 280  | 16 | 31.46 | 5.18 | 50.01 |
| chr8 | 26212920 | 26213803 | 884  | 482  | 20 | 36.1  | 7.39 | 47.01 |
| chr8 | 26655277 | 26656579 | 1303 | 630  | 27 | 37.82 | 6.16 | 46.64 |
| chr8 | 27802095 | 27802891 | 797  | 341  | 19 | 37.06 | 5.34 | 46.98 |
| chr8 | 28179870 | 28182238 | 2369 | 951  | 49 | 49.15 | 3.81 | 50.67 |
| chr8 | 28428543 | 28429644 | 1102 | 662  | 23 | 32.45 | 4.52 | 49.54 |

|      |          |          |      |      |    |       |      |       |
|------|----------|----------|------|------|----|-------|------|-------|
| chr8 | 28518543 | 28520030 | 1488 | 499  | 36 | 60.43 | 6.57 | 55.64 |
| chr8 | 28945708 | 28946761 | 1054 | 779  | 23 | 30.74 | 4.57 | 50.99 |
| chr8 | 28948492 | 28950116 | 1625 | 1359 | 32 | 39.75 | 4.62 | 46.65 |
| chr8 | 29386510 | 29388068 | 1559 | 1072 | 34 | 30.26 | 4.2  | 51.68 |
| chr8 | 29462360 | 29464726 | 2367 | 1600 | 61 | 37.4  | 5.14 | 46.71 |
| chr8 | 30123332 | 30124051 | 720  | 428  | 18 | 37.55 | 5.75 | 45.96 |
| chr8 | 30960054 | 30961208 | 1155 | 675  | 28 | 34.44 | 5.87 | 47.76 |
| chr8 | 31708254 | 31709157 | 904  | 620  | 20 | 34.93 | 4.93 | 47.57 |
| chr8 | 31811461 | 31812869 | 1409 | 771  | 29 | 40.21 | 4.52 | 46.68 |
| chr8 | 31842916 | 31843858 | 943  | 288  | 20 | 32.75 | 5.34 | 49.37 |
| chr8 | 32671605 | 32672578 | 974  | 430  | 21 | 35.16 | 4.93 | 47.17 |
| chr8 | 32964929 | 32965974 | 1046 | 465  | 21 | 31.38 | 5.75 | 50.17 |
| chr8 | 33160603 | 33161444 | 842  | 437  | 20 | 38.71 | 5.75 | 46.22 |
| chr8 | 33623076 | 33623923 | 848  | 276  | 19 | 33.92 | 4.93 | 48.7  |
| chr8 | 33636806 | 33637498 | 693  | 339  | 18 | 35.66 | 5.71 | 47.23 |
| chr8 | 34065484 | 34066951 | 1468 | 816  | 32 | 48.93 | 5.34 | 50.27 |
| chr8 | 36400810 | 36401644 | 835  | 605  | 19 | 34.69 | 4.52 | 47.81 |
| chr8 | 36687480 | 36688137 | 658  | 377  | 17 | 32.93 | 4.88 | 49.36 |
| chr8 | 36689594 | 36690541 | 948  | 440  | 20 | 32.48 | 4.93 | 49.47 |
| chr8 | 36858946 | 36860098 | 1153 | 458  | 23 | 30.03 | 6.98 | 51.47 |
| chr8 | 37737576 | 37738935 | 1360 | 480  | 34 | 34.67 | 4.81 | 47.74 |
| chr8 | 38131033 | 38132372 | 1340 | 1062 | 30 | 30.45 | 4.16 | 51.3  |
| chr8 | 38295879 | 38299015 | 3137 | 1362 | 67 | 45.36 | 4.36 | 49.49 |
| chr8 | 38302125 | 38303381 | 1257 | 651  | 25 | 32.55 | 5.34 | 49.37 |
| chr8 | 38680985 | 38683050 | 2066 | 715  | 45 | 43.84 | 5.88 | 47.95 |
| chr8 | 38763318 | 38764368 | 1051 | 563  | 26 | 30.95 | 4.08 | 50.52 |
| chr8 | 38859388 | 38861735 | 2348 | 1697 | 55 | 39.71 | 4.89 | 46.57 |
| chr8 | 39045573 | 39046392 | 820  | 239  | 19 | 35.61 | 5.34 | 47.29 |
| chr8 | 39324404 | 39325512 | 1109 | 569  | 24 | 35.99 | 5.34 | 47.09 |
| chr8 | 39359643 | 39360251 | 609  | 342  | 20 | 57.58 | 6.98 | 54.11 |
| chr8 | 39472075 | 39472805 | 731  | 268  | 17 | 32.22 | 4.52 | 49.98 |
| chr8 | 39545598 | 39546487 | 890  | 647  | 19 | 31.54 | 6.16 | 49.9  |
| chr8 | 39582611 | 39583599 | 989  | 494  | 20 | 30.36 | 4.93 | 51.62 |
| chr8 | 39769476 | 39771082 | 1607 | 552  | 33 | 36.33 | 4.19 | 47.03 |
| chr8 | 40056534 | 40057427 | 894  | 394  | 19 | 31.32 | 4.93 | 50.32 |
| chr8 | 41447485 | 41448351 | 867  | 578  | 19 | 32.82 | 5.34 | 49.42 |
| chr8 | 41709881 | 41710821 | 941  | 281  | 20 | 32.86 | 4.52 | 49.3  |
| chr8 | 42877039 | 42878084 | 1046 | 552  | 23 | 31.14 | 4.57 | 50.63 |
| chr8 | 42928243 | 42929382 | 1140 | 525  | 25 | 37.18 | 6.04 | 46.91 |
| chr8 | 47972736 | 47973607 | 872  | 266  | 20 | 36.83 | 5.34 | 46.86 |
| chr8 | 48033019 | 48034557 | 1539 | 1017 | 31 | 38.37 | 4.72 | 46.39 |
| chr8 | 48048093 | 48049105 | 1013 | 584  | 21 | 33.06 | 5.75 | 49.12 |
| chr8 | 48325014 | 48326261 | 1248 | 525  | 32 | 47.39 | 5.82 | 48.3  |
| chr8 | 48365061 | 48366515 | 1455 | 679  | 32 | 41.18 | 6.63 | 46.58 |
| chr8 | 48448330 | 48450318 | 1989 | 1537 | 44 | 42.34 | 4.75 | 47.02 |
| chr8 | 48469817 | 48470692 | 876  | 600  | 21 | 41.07 | 5.34 | 46.39 |
| chr8 | 48610172 | 48611349 | 1178 | 678  | 25 | 33.18 | 5.06 | 49.12 |
| chr8 | 49656155 | 49658192 | 2038 | 622  | 45 | 62.43 | 5.75 | 55.7  |
| chr8 | 49679900 | 49680864 | 965  | 601  | 20 | 31.58 | 4.93 | 50    |
| chr8 | 49842472 | 49843445 | 974  | 368  | 20 | 31.12 | 5.75 | 50.72 |
| chr8 | 50079950 | 50080928 | 979  | 344  | 23 | 32.94 | 5.52 | 49.39 |
| chr8 | 50125804 | 50126834 | 1031 | 668  | 23 | 36.13 | 6.16 | 46.98 |

|      |          |          |      |      |    |       |      |       |
|------|----------|----------|------|------|----|-------|------|-------|
| chr8 | 50402632 | 50403993 | 1362 | 688  | 32 | 55.05 | 5.34 | 53.56 |
| chr8 | 50549756 | 50550606 | 851  | 446  | 20 | 37.73 | 5.3  | 46.61 |
| chr8 | 50643948 | 50644779 | 832  | 277  | 18 | 30.6  | 4.52 | 51.25 |
| chr8 | 50924304 | 50925285 | 982  | 348  | 22 | 34.71 | 4.11 | 47.7  |
| chr8 | 51067549 | 51068804 | 1256 | 778  | 27 | 40.21 | 6.16 | 46.67 |
| chr8 | 51194180 | 51194839 | 660  | 265  | 17 | 36.96 | 4.93 | 46.94 |
| chr8 | 51219176 | 51219967 | 792  | 505  | 21 | 46.98 | 5.75 | 47.69 |
| chr8 | 51324121 | 51324862 | 742  | 366  | 19 | 36.81 | 4.95 | 46.8  |
| chr8 | 51439233 | 51439951 | 719  | 353  | 17 | 32.97 | 4.52 | 49.24 |
| chr8 | 51581476 | 51582437 | 962  | 246  | 21 | 35.83 | 5.75 | 47.08 |
| chr8 | 52468251 | 52469234 | 984  | 726  | 21 | 34.6  | 4.52 | 47.68 |
| chr8 | 52749544 | 52750621 | 1078 | 338  | 26 | 35.78 | 5.59 | 47.16 |
| chr8 | 52755046 | 52756278 | 1233 | 716  | 29 | 33.71 | 4.57 | 48.6  |
| chr8 | 52818877 | 52820352 | 1476 | 567  | 32 | 34.9  | 4.45 | 47.6  |
| chr8 | 53490224 | 53491215 | 992  | 727  | 21 | 34.17 | 5.34 | 47.99 |
| chr8 | 53568014 | 53569963 | 1950 | 577  | 37 | 44.34 | 4.52 | 48.34 |
| chr8 | 53745293 | 53746049 | 757  | 261  | 17 | 30.65 | 4.93 | 51.07 |
| chr8 | 53940986 | 53941871 | 886  | 272  | 19 | 31.76 | 4.52 | 49.79 |
| chr8 | 53943418 | 53945111 | 1694 | 442  | 36 | 48.97 | 5.34 | 50.38 |
| chr8 | 54487951 | 54488852 | 902  | 548  | 21 | 39.4  | 4.52 | 46.96 |
| chr8 | 54755312 | 54757021 | 1710 | 755  | 43 | 35.51 | 4.46 | 47.24 |
| chr8 | 54877489 | 54880915 | 3427 | 1267 | 69 | 53.02 | 4.41 | 50.9  |
| chr8 | 55103810 | 55105433 | 1624 | 1335 | 30 | 30.48 | 3.88 | 51.3  |
| chr8 | 55448387 | 55449296 | 910  | 526  | 25 | 53.04 | 7.39 | 51.07 |
| chr8 | 55851176 | 55851908 | 733  | 451  | 17 | 32.1  | 5.34 | 49.7  |
| chr8 | 55935478 | 55936563 | 1086 | 536  | 23 | 33.24 | 6.57 | 49.01 |
| chr8 | 55959067 | 55959926 | 860  | 282  | 20 | 37.57 | 4.93 | 45.96 |
| chr8 | 56018276 | 56019174 | 899  | 440  | 19 | 31.05 | 4.52 | 50.69 |
| chr8 | 56267908 | 56268860 | 953  | 413  | 21 | 36.34 | 5.34 | 47.04 |
| chr8 | 56269700 | 56270735 | 1036 | 600  | 21 | 31.88 | 5.75 | 49.76 |
| chr8 | 56294626 | 56295533 | 908  | 621  | 22 | 39.03 | 4.93 | 46.21 |
| chr8 | 56428038 | 56428938 | 901  | 381  | 20 | 35.1  | 4.11 | 47.35 |
| chr8 | 56450482 | 56451511 | 1030 | 605  | 23 | 36.18 | 5.75 | 46.84 |
| chr8 | 56489711 | 56490686 | 976  | 614  | 22 | 35.04 | 4.52 | 47.48 |
| chr8 | 56553386 | 56554595 | 1210 | 787  | 25 | 34.33 | 6.52 | 47.77 |
| chr8 | 56638057 | 56638808 | 752  | 367  | 18 | 35.4  | 5.34 | 47.5  |
| chr8 | 57866639 | 57868060 | 1422 | 813  | 35 | 31.01 | 4.28 | 50.5  |
| chr8 | 57924505 | 57925145 | 641  | 266  | 16 | 30.18 | 4.95 | 51.7  |
| chr8 | 58589140 | 58590440 | 1301 | 759  | 28 | 41.81 | 6.98 | 46.93 |
| chr8 | 58593976 | 58595090 | 1115 | 687  | 23 | 31.81 | 4.93 | 49.81 |
| chr8 | 58728632 | 58729514 | 883  | 416  | 20 | 36.16 | 4.11 | 46.96 |
| chr8 | 58957507 | 58958339 | 833  | 212  | 19 | 34.81 | 4.52 | 47.51 |
| chr8 | 59155352 | 59156249 | 898  | 267  | 19 | 31.11 | 5.75 | 50.64 |
| chr8 | 59173136 | 59174006 | 871  | 316  | 19 | 32.59 | 4.93 | 49.42 |
| chr8 | 59174624 | 59175387 | 764  | 533  | 17 | 30.24 | 4.11 | 51.77 |
| chr8 | 59448142 | 59449439 | 1298 | 642  | 28 | 37.59 | 5    | 45.83 |
| chr8 | 59492904 | 59494438 | 1535 | 737  | 41 | 63.05 | 5.24 | 52.97 |
| chr8 | 59555026 | 59555889 | 864  | 581  | 21 | 32.92 | 3.84 | 49.32 |
| chr8 | 59709467 | 59711223 | 1757 | 1332 | 38 | 53.51 | 4.52 | 52.01 |
| chr8 | 59719872 | 59721968 | 2097 | 1036 | 53 | 39.5  | 3.42 | 47.06 |
| chr8 | 59840286 | 59842176 | 1891 | 539  | 39 | 38.84 | 5.32 | 46.24 |
| chr8 | 60059166 | 60061521 | 2356 | 1077 | 57 | 48.61 | 4.76 | 49.9  |

|      |          |          |      |      |    |       |      |       |
|------|----------|----------|------|------|----|-------|------|-------|
| chr8 | 60152796 | 60154652 | 1857 | 517  | 35 | 33.25 | 5    | 48.94 |
| chr8 | 60315670 | 60316896 | 1227 | 579  | 26 | 37.77 | 5.34 | 46.65 |
| chr8 | 60446804 | 60448794 | 1991 | 541  | 43 | 32.12 | 4.05 | 49.72 |
| chr8 | 60451643 | 60453153 | 1511 | 523  | 34 | 46.26 | 5.06 | 48.69 |
| chr8 | 60518767 | 60519677 | 911  | 541  | 19 | 30.42 | 4.93 | 51.31 |
| chr8 | 60654575 | 60655226 | 652  | 203  | 16 | 32.74 | 4.52 | 49.34 |
| chr8 | 60736998 | 60738553 | 1556 | 536  | 30 | 40.64 | 4.93 | 46.7  |
| chr8 | 60876217 | 60877887 | 1671 | 590  | 35 | 30.42 | 3.66 | 51.39 |
| chr8 | 61451161 | 61452217 | 1057 | 629  | 23 | 34.73 | 5.34 | 47.65 |
| chr8 | 61500813 | 61501913 | 1101 | 427  | 26 | 39.79 | 5.33 | 46.66 |
| chr8 | 62014964 | 62016592 | 1629 | 1192 | 41 | 63.35 | 6.69 | 54.98 |
| chr8 | 62358923 | 62359766 | 844  | 315  | 21 | 40.11 | 5.06 | 46.59 |
| chr8 | 62509584 | 62510592 | 1009 | 720  | 25 | 32.48 | 6.59 | 49.47 |
| chr8 | 62644412 | 62646105 | 1694 | 1026 | 31 | 34.14 | 4.48 | 48    |
| chr8 | 62713500 | 62714956 | 1457 | 887  | 32 | 49.54 | 4.11 | 51.22 |
| chr8 | 62899921 | 62900938 | 1018 | 531  | 23 | 36.42 | 5.71 | 47.16 |
| chr8 | 62919584 | 62920474 | 891  | 492  | 21 | 30.28 | 5.48 | 51.66 |
| chr8 | 62990245 | 62991178 | 934  | 652  | 20 | 33.24 | 5.34 | 48.96 |
| chr8 | 63299876 | 63300696 | 821  | 322  | 18 | 31.22 | 5.34 | 50.51 |
| chr8 | 63524417 | 63526057 | 1641 | 1074 | 31 | 36.84 | 4.93 | 46.84 |
| chr8 | 63676103 | 63676998 | 896  | 280  | 19 | 31.21 | 4.93 | 50.51 |
| chr8 | 63901499 | 63902553 | 1055 | 769  | 21 | 30.94 | 4.52 | 50.6  |
| chr8 | 64779341 | 64780626 | 1286 | 552  | 28 | 42.61 | 6.16 | 47.35 |
| chr8 | 64988392 | 64989388 | 997  | 715  | 22 | 33.9  | 4.93 | 48.58 |
| chr8 | 65294522 | 65296000 | 1479 | 669  | 35 | 50.07 | 6.09 | 51.79 |
| chr8 | 65363788 | 65365823 | 2036 | 1364 | 39 | 39.18 | 5.42 | 46.26 |
| chr8 | 65427757 | 65428864 | 1108 | 369  | 25 | 40.11 | 4.52 | 46.61 |
| chr8 | 65881939 | 65882990 | 1052 | 466  | 24 | 39.1  | 4.93 | 46.3  |
| chr8 | 66139068 | 66139900 | 833  | 415  | 20 | 39.29 | 6.16 | 46.52 |
| chr8 | 66385894 | 66386889 | 996  | 647  | 27 | 50.92 | 6.09 | 51.83 |
| chr8 | 66510731 | 66512333 | 1603 | 408  | 45 | 90    | 7.8  | 40.62 |
| chr8 | 66626642 | 66627829 | 1188 | 435  | 32 | 66.85 | 6.98 | 55.33 |
| chr8 | 66782453 | 66783626 | 1174 | 579  | 26 | 40.57 | 5.75 | 46.82 |
| chr8 | 66847906 | 66849372 | 1467 | 686  | 31 | 45    | 6.57 | 48.99 |
| chr8 | 67170050 | 67170853 | 804  | 275  | 18 | 32.2  | 6.16 | 49.96 |
| chr8 | 67266074 | 67267604 | 1531 | 526  | 31 | 38.74 | 4.72 | 46.17 |
| chr8 | 67352413 | 67353338 | 926  | 486  | 20 | 33.68 | 5.34 | 48.64 |
| chr8 | 67378608 | 67379723 | 1116 | 658  | 25 | 35.03 | 5.33 | 47.48 |
| chr8 | 67882039 | 67882707 | 669  | 236  | 20 | 41.35 | 5.82 | 46.94 |
| chr8 | 67968903 | 67970146 | 1244 | 802  | 29 | 45.2  | 5.06 | 49.18 |
| chr8 | 68138636 | 68139706 | 1071 | 598  | 26 | 35.56 | 5.19 | 47.18 |
| chr8 | 68328266 | 68329025 | 760  | 233  | 20 | 30.13 | 4.4  | 51.64 |
| chr8 | 68444478 | 68445274 | 797  | 363  | 20 | 30.58 | 4.32 | 51.19 |
| chr8 | 68798198 | 68799262 | 1065 | 610  | 25 | 42.13 | 6.93 | 46.86 |
| chr8 | 68906736 | 68908658 | 1923 | 607  | 38 | 45.53 | 5.34 | 50.04 |
| chr8 | 68976637 | 68978168 | 1532 | 1089 | 36 | 49.14 | 5.21 | 50.61 |
| chr8 | 68993952 | 68994792 | 841  | 577  | 18 | 30.11 | 4.93 | 51.58 |
| chr8 | 69101242 | 69101996 | 755  | 505  | 17 | 30.77 | 4.93 | 50.95 |
| chr8 | 70102735 | 70103311 | 577  | 288  | 16 | 37.66 | 6.57 | 46.06 |
| chr8 | 71249363 | 71250120 | 758  | 468  | 18 | 31.38 | 4.95 | 50.24 |
| chr8 | 71963528 | 71964821 | 1294 | 628  | 31 | 54.86 | 6.57 | 54    |
| chr8 | 72669177 | 72670000 | 824  | 349  | 20 | 39.89 | 5.75 | 46.62 |

|      |          |          |      |      |    |       |      |       |
|------|----------|----------|------|------|----|-------|------|-------|
| chr8 | 73474742 | 73475666 | 925  | 234  | 21 | 33.82 | 4.19 | 48.79 |
| chr8 | 74719177 | 74720512 | 1336 | 859  | 34 | 38.56 | 4.36 | 46.26 |
| chr8 | 74737529 | 74738495 | 967  | 383  | 21 | 31.49 | 5.71 | 49.89 |
| chr8 | 75054654 | 75055471 | 818  | 441  | 21 | 43.92 | 6.04 | 47.69 |
| chr8 | 75784736 | 75785998 | 1263 | 797  | 26 | 35.52 | 4.89 | 47.28 |
| chr8 | 76314932 | 76315663 | 732  | 412  | 18 | 33.02 | 4.95 | 49.13 |
| chr8 | 76597347 | 76598255 | 909  | 634  | 22 | 38.97 | 4.52 | 46.04 |
| chr8 | 77174455 | 77176171 | 1717 | 1139 | 34 | 40.52 | 5.34 | 46.96 |
| chr8 | 77243064 | 77244404 | 1341 | 708  | 27 | 35.99 | 6.16 | 47.07 |
| chr8 | 77321577 | 77323343 | 1767 | 1090 | 44 | 73.89 | 6.16 | 57.83 |
| chr8 | 77467460 | 77468144 | 685  | 413  | 16 | 30.61 | 5.34 | 51.15 |
| chr8 | 77485420 | 77486285 | 866  | 237  | 23 | 41.81 | 4.57 | 46.95 |
| chr8 | 77498148 | 77499126 | 979  | 239  | 21 | 34.88 | 4.93 | 47.64 |
| chr8 | 77519430 | 77520629 | 1200 | 506  | 25 | 35.26 | 5.34 | 47.36 |
| chr8 | 78145539 | 78146526 | 988  | 283  | 23 | 38.56 | 4.52 | 46.19 |
| chr8 | 78155235 | 78156145 | 911  | 283  | 20 | 34.53 | 5.34 | 47.68 |
| chr8 | 78256179 | 78257237 | 1059 | 599  | 24 | 38.71 | 5.75 | 46.24 |
| chr8 | 78501638 | 78502430 | 793  | 504  | 18 | 32.85 | 5.75 | 49.28 |
| chr8 | 78593815 | 78594595 | 781  | 416  | 21 | 47.83 | 6.98 | 49.34 |
| chr8 | 78739988 | 78740838 | 851  | 291  | 19 | 33.74 | 4.93 | 48.63 |
| chr8 | 78942783 | 78943722 | 940  | 455  | 20 | 32.91 | 4.11 | 49.24 |
| chr8 | 79188613 | 79189483 | 871  | 622  | 19 | 32.59 | 6.16 | 49.42 |
| chr8 | 79409298 | 79410270 | 973  | 486  | 21 | 31.16 | 4.95 | 50.55 |
| chr8 | 79527358 | 79528577 | 1220 | 446  | 24 | 30.62 | 5.75 | 51.18 |
| chr8 | 79552491 | 79553365 | 875  | 592  | 21 | 31.21 | 4.11 | 50.56 |
| chr8 | 79576386 | 79579142 | 2757 | 586  | 65 | 30.79 | 2.75 | 51    |
| chr8 | 79746639 | 79748140 | 1502 | 973  | 32 | 31.68 | 3.66 | 49.83 |
| chr8 | 79983210 | 79983939 | 730  | 381  | 17 | 32.28 | 5.34 | 50.02 |
| chr8 | 80186643 | 80187387 | 745  | 344  | 18 | 35.86 | 4.93 | 47    |
| chr8 | 80375423 | 80376293 | 871  | 385  | 19 | 32.59 | 4.52 | 49.42 |
| chr8 | 80497790 | 80499354 | 1565 | 959  | 32 | 43.93 | 4.52 | 47.66 |
| chr8 | 80558282 | 80559162 | 881  | 375  | 25 | 41.85 | 6.04 | 47.12 |
| chr8 | 81303589 | 81304468 | 880  | 290  | 22 | 40.81 | 6.57 | 46.37 |
| chr8 | 81358460 | 81359237 | 778  | 286  | 18 | 33.76 | 5.34 | 48.7  |
| chr8 | 81797359 | 81798234 | 876  | 279  | 19 | 32.31 | 5.34 | 50.09 |
| chr8 | 82183712 | 82184546 | 835  | 263  | 18 | 30.44 | 4.93 | 51.32 |
| chr8 | 82468715 | 82469668 | 954  | 701  | 21 | 36.29 | 4.93 | 46.94 |
| chr8 | 82730551 | 82732286 | 1736 | 575  | 33 | 31.03 | 4.95 | 50.49 |
| chr8 | 82919007 | 82919859 | 853  | 335  | 20 | 38.01 | 4.93 | 46.47 |
| chr8 | 83197575 | 83198263 | 689  | 428  | 16 | 30.36 | 3.7  | 51.66 |
| chr8 | 83209079 | 83211014 | 1936 | 610  | 45 | 53.12 | 6.06 | 51.42 |
| chr8 | 83213615 | 83215579 | 1965 | 506  | 43 | 32.47 | 4.21 | 49.48 |
| chr8 | 83286686 | 83287569 | 884  | 575  | 19 | 31.87 | 5.75 | 49.75 |
| chr8 | 83310469 | 83311595 | 1127 | 793  | 31 | 66.51 | 5.75 | 55.48 |
| chr8 | 83481569 | 83482771 | 1203 | 641  | 25 | 35.11 | 5.75 | 47.43 |
| chr8 | 83600085 | 83601331 | 1247 | 524  | 29 | 30.08 | 5.29 | 51.53 |
| chr8 | 83719214 | 83719997 | 784  | 530  | 18 | 31.39 | 4.72 | 50.21 |
| chr8 | 84015702 | 84016519 | 818  | 286  | 18 | 31.39 | 4.11 | 50.18 |
| chr8 | 84057856 | 84059121 | 1266 | 773  | 27 | 39.68 | 4.93 | 46.53 |
| chr8 | 84086414 | 84087342 | 929  | 706  | 20 | 33.51 | 4.11 | 48.66 |
| chr8 | 84090163 | 84091107 | 945  | 700  | 20 | 32.64 | 4.52 | 49.32 |
| chr8 | 84102752 | 84103414 | 663  | 373  | 16 | 32.01 | 6.16 | 49.76 |



|      |          |          |      |      |    |       |      |       |
|------|----------|----------|------|------|----|-------|------|-------|
| chr8 | 84117910 | 84118804 | 895  | 636  | 19 | 31.27 | 6.57 | 50.46 |
| chr8 | 84140001 | 84140737 | 737  | 222  | 19 | 41.17 | 4.11 | 46.48 |
| chr8 | 84424384 | 84426906 | 2523 | 1324 | 50 | 30.29 | 3.74 | 51.67 |
| chr8 | 84441724 | 84442863 | 1140 | 693  | 24 | 34.4  | 5.34 | 47.75 |
| chr8 | 84518763 | 84519835 | 1073 | 618  | 24 | 37.93 | 5.34 | 46.54 |
| chr8 | 84595657 | 84596662 | 1006 | 638  | 23 | 37.53 | 5.75 | 45.96 |
| chr8 | 84847692 | 84849207 | 1516 | 904  | 37 | 55.98 | 5.33 | 53.78 |
| chr8 | 85054450 | 85055731 | 1282 | 784  | 29 | 46.94 | 4.52 | 47.7  |
| chr8 | 85122159 | 85122808 | 650  | 282  | 16 | 32.87 | 6.16 | 49.29 |
| chr8 | 85230448 | 85231591 | 1144 | 548  | 23 | 30.45 | 4.93 | 51.27 |
| chr8 | 85424730 | 85425546 | 817  | 287  | 18 | 31.1  | 5.71 | 50.63 |
| chr8 | 85482114 | 85483060 | 947  | 253  | 21 | 36.69 | 4.52 | 46.9  |
| chr8 | 85658914 | 85660057 | 1144 | 398  | 28 | 31.57 | 4.94 | 49.96 |
| chr8 | 85679804 | 85680697 | 894  | 663  | 20 | 35.51 | 4.52 | 47.23 |
| chr8 | 85727125 | 85728827 | 1703 | 1225 | 33 | 41.14 | 4.93 | 46.4  |
| chr8 | 86042966 | 86044867 | 1902 | 1259 | 44 | 31.49 | 5.14 | 49.92 |
| chr8 | 86238484 | 86239647 | 1164 | 655  | 24 | 33.22 | 6.16 | 49.13 |
| chr8 | 86385315 | 86386640 | 1326 | 759  | 27 | 36.7  | 6.98 | 47    |
| chr8 | 86468419 | 86469557 | 1139 | 540  | 25 | 38.41 | 4.93 | 46.35 |
| chr8 | 87022023 | 87023318 | 1296 | 533  | 27 | 33.36 | 5.71 | 48.68 |
| chr8 | 87273523 | 87274516 | 994  | 595  | 20 | 30.11 | 4.11 | 51.59 |
| chr8 | 87282059 | 87283046 | 988  | 643  | 21 | 30.95 | 3.85 | 50.52 |
| chr8 | 87312425 | 87313363 | 939  | 694  | 22 | 37.16 | 4.93 | 46.85 |
| chr8 | 87324432 | 87325778 | 1347 | 744  | 32 | 49.7  | 6.09 | 51.48 |
| chr8 | 87510477 | 87511902 | 1426 | 617  | 34 | 55.51 | 5.34 | 54.01 |
| chr8 | 87754931 | 87755767 | 837  | 552  | 18 | 30.33 | 4.93 | 51.59 |
| chr8 | 87944713 | 87945858 | 1146 | 859  | 23 | 30.35 | 5.34 | 51.6  |
| chr8 | 88079574 | 88080294 | 721  | 430  | 19 | 32.95 | 5.14 | 49.32 |
| chr8 | 88215209 | 88216593 | 1385 | 737  | 31 | 49.43 | 4.52 | 51.85 |
| chr8 | 88250855 | 88251475 | 621  | 336  | 17 | 39.9  | 6.57 | 46.57 |
| chr8 | 88291179 | 88292105 | 927  | 635  | 20 | 33.62 | 5.34 | 48.71 |
| chr8 | 88537044 | 88537950 | 907  | 382  | 19 | 30.63 | 4.52 | 51.2  |
| chr8 | 88923759 | 88924567 | 809  | 527  | 18 | 31.91 | 4.93 | 49.82 |
| chr8 | 88953921 | 88954871 | 951  | 476  | 24 | 45.32 | 6.98 | 49.35 |
| chr8 | 89112005 | 89113167 | 1163 | 675  | 25 | 37.14 | 6.16 | 46.91 |
| chr8 | 89181481 | 89182647 | 1167 | 510  | 30 | 44.57 | 6.85 | 48.88 |
| chr8 | 89185119 | 89185886 | 768  | 369  | 17 | 30.01 | 4.11 | 51.49 |
| chr8 | 89416513 | 89418004 | 1492 | 324  | 31 | 43.73 | 4.52 | 47.83 |
| chr8 | 89719769 | 89720560 | 792  | 412  | 19 | 37.38 | 5.34 | 46.63 |
| chr8 | 90282690 | 90284290 | 1601 | 228  | 30 | 30.14 | 3.81 | 51.66 |
| chr8 | 90737593 | 90739257 | 1665 | 854  | 44 | 30.88 | 3.72 | 50.82 |
| chr8 | 90830945 | 90832081 | 1137 | 439  | 26 | 31.39 | 4.45 | 50.22 |
| chr8 | 90977755 | 90978569 | 815  | 256  | 20 | 36.36 | 5.33 | 47.16 |
| chr8 | 91030331 | 91031100 | 770  | 267  | 21 | 36.98 | 5.04 | 46.95 |
| chr8 | 91681136 | 91682462 | 1327 | 504  | 29 | 43.9  | 6.12 | 47.73 |
| chr8 | 91797602 | 91798816 | 1215 | 643  | 24 | 30.84 | 6.57 | 50.89 |
| chr8 | 92234596 | 92235850 | 1255 | 731  | 27 | 35.35 | 5.71 | 47.44 |
| chr8 | 93166328 | 93167270 | 943  | 538  | 20 | 32.75 | 5.75 | 49.37 |
| chr8 | 93627973 | 93628526 | 554  | 277  | 15 | 37.66 | 6.16 | 46.06 |
| chr8 | 93887799 | 93888885 | 1087 | 482  | 23 | 33.19 | 5.34 | 49.07 |
| chr8 | 94530730 | 94531587 | 858  | 280  | 20 | 37.69 | 5.75 | 46.5  |
| chr8 | 94721295 | 94722022 | 728  | 263  | 18 | 33.82 | 5.39 | 48.84 |

|      |           |           |      |      |    |       |      |       |
|------|-----------|-----------|------|------|----|-------|------|-------|
| chr8 | 94797806  | 94798701  | 896  | 273  | 20 | 33.78 | 4.38 | 48.69 |
| chr8 | 95422063  | 95425639  | 3577 | 2851 | 83 | 50.08 | 4.14 | 51.85 |
| chr8 | 95586279  | 95587091  | 813  | 269  | 20 | 40.63 | 4.93 | 46.74 |
| chr8 | 96000296  | 96001923  | 1628 | 673  | 42 | 34.87 | 4.21 | 47.59 |
| chr8 | 96167203  | 96169491  | 2289 | 1717 | 58 | 30.34 | 4.25 | 51.62 |
| chr8 | 96290661  | 96291548  | 888  | 534  | 19 | 31.65 | 4.52 | 49.86 |
| chr8 | 96778380  | 96779405  | 1026 | 436  | 24 | 40.61 | 6.98 | 46.71 |
| chr8 | 96865306  | 96866653  | 1348 | 616  | 28 | 39.41 | 6.16 | 47.05 |
| chr8 | 97065899  | 97066662  | 764  | 374  | 18 | 31.01 | 4.95 | 50.49 |
| chr8 | 97089214  | 97090523  | 1310 | 493  | 27 | 36.24 | 4.43 | 46.94 |
| chr8 | 97365922  | 97366954  | 1033 | 298  | 25 | 33.39 | 4.11 | 48.72 |
| chr8 | 97830681  | 97832137  | 1457 | 605  | 41 | 58.51 | 6.66 | 53.96 |
| chr8 | 98086350  | 98087985  | 1636 | 669  | 37 | 40.41 | 3.77 | 46.81 |
| chr8 | 98316500  | 98317170  | 671  | 461  | 16 | 31.49 | 5.75 | 49.84 |
| chr8 | 98414084  | 98415120  | 1037 | 755  | 25 | 39.48 | 4.19 | 47.11 |
| chr8 | 99496193  | 99497021  | 829  | 286  | 20 | 30.09 | 4.11 | 51.54 |
| chr8 | 100087903 | 100089295 | 1393 | 640  | 34 | 37.51 | 4.16 | 46.07 |
| chr8 | 100145502 | 100148198 | 2697 | 1660 | 80 | 87.85 | 5.29 | 45.71 |
| chr8 | 100186466 | 100187768 | 1303 | 802  | 30 | 30.47 | 4.98 | 51.24 |
| chr8 | 100306697 | 100307588 | 892  | 653  | 25 | 54.42 | 5.34 | 53.91 |
| chr8 | 100344861 | 100345988 | 1128 | 419  | 26 | 41.15 | 6.77 | 46.37 |
| chr8 | 100357639 | 100358644 | 1006 | 541  | 21 | 31.19 | 4.72 | 50.52 |
| chr8 | 100494100 | 100496122 | 2023 | 652  | 44 | 30.67 | 4.81 | 51.07 |
| chr8 | 100594969 | 100596225 | 1257 | 468  | 30 | 32.78 | 4.05 | 49.46 |
| chr8 | 100646461 | 100648073 | 1613 | 464  | 37 | 50.44 | 4.57 | 51.88 |
| chr8 | 100682825 | 100684250 | 1426 | 976  | 30 | 36.27 | 5.21 | 46.92 |
| chr8 | 100780145 | 100781065 | 921  | 466  | 22 | 34.05 | 4.57 | 48.53 |
| chr8 | 100905333 | 100907033 | 1701 | 749  | 40 | 43.07 | 3.91 | 47.14 |
| chr8 | 100921198 | 100922427 | 1230 | 436  | 24 | 30.17 | 5.34 | 51.65 |
| chr8 | 101043683 | 101044839 | 1157 | 586  | 25 | 37.45 | 6.16 | 46.31 |
| chr8 | 101119263 | 101120168 | 906  | 339  | 22 | 39.15 | 6.16 | 46.25 |
| chr8 | 101321079 | 101323052 | 1974 | 1049 | 45 | 31.1  | 3.42 | 50.63 |
| chr8 | 101331906 | 101332794 | 889  | 652  | 21 | 35.96 | 4.57 | 47    |
| chr8 | 101873006 | 101874158 | 1153 | 282  | 28 | 47.3  | 4.33 | 48.14 |
| chr8 | 102381992 | 102382807 | 816  | 287  | 20 | 40.42 | 6.98 | 46.89 |
| chr8 | 102447076 | 102448210 | 1135 | 393  | 25 | 38.62 | 6.57 | 46.09 |
| chr8 | 102576103 | 102576799 | 697  | 436  | 17 | 34.4  | 5.34 | 47.76 |
| chr8 | 102857404 | 102858271 | 868  | 428  | 21 | 41.59 | 5.75 | 47.18 |
| chr8 | 103047477 | 103048222 | 746  | 461  | 21 | 39.86 | 4.11 | 46.61 |
| chr8 | 103217195 | 103218487 | 1293 | 502  | 27 | 38.31 | 4.93 | 46.39 |
| chr8 | 103568652 | 103569492 | 841  | 555  | 18 | 30.11 | 4.52 | 51.58 |
| chr8 | 103881894 | 103882847 | 954  | 500  | 20 | 32.16 | 4.52 | 49.86 |
| chr8 | 104056788 | 104058118 | 1331 | 581  | 30 | 30.29 | 4.12 | 51.68 |
| chr8 | 104393196 | 104394155 | 960  | 242  | 21 | 35.94 | 4.52 | 47.02 |
| chr8 | 104418892 | 104420452 | 1561 | 818  | 40 | 56.34 | 5.19 | 53.9  |
| chr8 | 104548310 | 104549273 | 964  | 681  | 20 | 31.63 | 4.93 | 49.87 |
| chr8 | 106553850 | 106554746 | 897  | 636  | 23 | 33.76 | 4.11 | 48.69 |
| chr8 | 107237784 | 107238542 | 759  | 500  | 19 | 35.65 | 4.19 | 47.28 |
| chr8 | 107325102 | 107325953 | 852  | 590  | 20 | 38.07 | 4.93 | 46.37 |
| chr8 | 107513289 | 107513910 | 622  | 275  | 15 | 30.07 | 5.34 | 51.52 |
| chr8 | 108501687 | 108502710 | 1024 | 256  | 21 | 32.49 | 4.11 | 49.45 |
| chr8 | 108505873 | 108507609 | 1737 | 723  | 36 | 46.24 | 5.3  | 48.69 |

|      |           |           |      |      |    |       |      |       |
|------|-----------|-----------|------|------|----|-------|------|-------|
| chr8 | 108582561 | 108583307 | 747  | 380  | 17 | 31.25 | 4.93 | 50.49 |
| chr8 | 108732944 | 108734594 | 1651 | 1107 | 34 | 42.04 | 4.03 | 46.97 |
| chr8 | 108760775 | 108762192 | 1418 | 652  | 30 | 38.17 | 5.71 | 46.24 |
| chr8 | 108960316 | 108961410 | 1095 | 514  | 23 | 32.79 | 4.52 | 49.41 |
| chr8 | 108969212 | 108970187 | 976  | 565  | 21 | 35.04 | 5.34 | 47.48 |
| chr8 | 109000231 | 109001027 | 797  | 412  | 25 | 56.95 | 7.23 | 52.84 |
| chr8 | 109208648 | 109209586 | 939  | 678  | 21 | 37.16 | 5.34 | 46.85 |
| chr8 | 109547770 | 109548935 | 1166 | 522  | 27 | 33.38 | 4.79 | 48.69 |
| chr8 | 109674386 | 109675487 | 1102 | 539  | 26 | 44.72 | 5.75 | 48.83 |
| chr8 | 110039815 | 110041168 | 1354 | 707  | 26 | 31.37 | 6.93 | 50.25 |
| chr8 | 110130517 | 110131410 | 894  | 331  | 20 | 31.58 | 4.95 | 49.99 |
| chr8 | 110148032 | 110148771 | 740  | 400  | 18 | 32.51 | 4.19 | 49.41 |
| chr8 | 110389742 | 110390723 | 982  | 582  | 21 | 33.68 | 5.24 | 48.63 |
| chr8 | 110706523 | 110707418 | 896  | 274  | 23 | 44.37 | 5.75 | 48.49 |
| chr8 | 110840899 | 110841839 | 941  | 556  | 21 | 37.04 | 6.16 | 46.99 |
| chr8 | 110848907 | 110850313 | 1407 | 566  | 31 | 42.41 | 4.19 | 47.12 |
| chr8 | 110884724 | 110885751 | 1028 | 503  | 21 | 32.28 | 5.34 | 50.03 |
| chr8 | 111102660 | 111103904 | 1245 | 493  | 25 | 33.1  | 6.16 | 49.16 |
| chr8 | 111319950 | 111320951 | 1002 | 693  | 24 | 42.06 | 6.57 | 47.01 |
| chr8 | 111350080 | 111351384 | 1305 | 557  | 31 | 54.18 | 7.8  | 53.3  |
| chr8 | 111490764 | 111491937 | 1174 | 445  | 24 | 32.74 | 5.75 | 49.37 |
| chr8 | 111606031 | 111606869 | 839  | 582  | 19 | 34.45 | 6.16 | 47.73 |
| chr8 | 111721770 | 111722447 | 678  | 407  | 19 | 45.71 | 5.34 | 49.85 |
| chr8 | 112067900 | 112069135 | 1236 | 592  | 28 | 45.38 | 5.75 | 49.6  |
| chr8 | 112575066 | 112575821 | 756  | 224  | 17 | 30.71 | 4.11 | 51.03 |
| chr8 | 112652262 | 112653100 | 839  | 576  | 18 | 30.22 | 4.52 | 51.69 |
| chr8 | 112790242 | 112791244 | 1003 | 450  | 21 | 33.58 | 4.93 | 48.66 |
| chr8 | 112802815 | 112803672 | 858  | 417  | 21 | 35.97 | 5.88 | 47.05 |
| chr8 | 112904509 | 112905387 | 879  | 599  | 20 | 36.4  | 4.52 | 47.15 |
| chr8 | 113598738 | 113600044 | 1307 | 601  | 25 | 30.34 | 8.22 | 51.6  |
| chr8 | 113932486 | 113934067 | 1582 | 1017 | 35 | 44.55 | 4.95 | 48.76 |
| chr8 | 114437961 | 114438887 | 927  | 641  | 22 | 30.87 | 4.69 | 50.8  |
| chr8 | 114834721 | 114835396 | 676  | 425  | 16 | 31.17 | 5.34 | 50.55 |
| chr8 | 114913788 | 114915091 | 1304 | 620  | 28 | 41.66 | 6.16 | 47.17 |
| chr8 | 114916946 | 114917908 | 963  | 704  | 20 | 31.69 | 4.52 | 49.8  |
| chr8 | 114919448 | 114920215 | 768  | 460  | 17 | 30.01 | 4.93 | 51.49 |
| chr8 | 115195105 | 115196343 | 1239 | 672  | 27 | 41.11 | 6.57 | 46.35 |
| chr8 | 115245796 | 115246600 | 805  | 503  | 18 | 32.14 | 4.11 | 49.83 |
| chr8 | 115839883 | 115840697 | 815  | 538  | 21 | 45.28 | 6.16 | 49.18 |
| chr8 | 115923380 | 115924295 | 916  | 290  | 19 | 30.15 | 4.11 | 51.66 |
| chr8 | 116173803 | 116174848 | 1046 | 531  | 23 | 35.32 | 5.75 | 47.4  |
| chr8 | 116251991 | 116252827 | 837  | 427  | 19 | 34.57 | 5.75 | 47.74 |
| chr8 | 116346857 | 116347936 | 1080 | 665  | 23 | 33.55 | 6.57 | 48.64 |
| chr8 | 116410214 | 116410862 | 649  | 268  | 16 | 32.94 | 6.16 | 49.39 |
| chr8 | 116906149 | 116907673 | 1525 | 845  | 32 | 42.66 | 4.72 | 47.36 |
| chr8 | 117150973 | 117151865 | 893  | 289  | 20 | 35.57 | 4.11 | 47.15 |
| chr8 | 117517841 | 117519163 | 1323 | 605  | 28 | 39.37 | 6.04 | 46.83 |
| chr8 | 117709949 | 117711263 | 1315 | 645  | 34 | 36.46 | 4.17 | 47.1  |
| chr8 | 118075656 | 118077181 | 1526 | 272  | 30 | 36.25 | 5.18 | 46.92 |
| chr8 | 118112015 | 118112901 | 887  | 231  | 21 | 39.93 | 4.48 | 46.68 |
| chr8 | 118433937 | 118434854 | 918  | 260  | 20 | 34.13 | 4.52 | 48.07 |
| chr8 | 118684125 | 118685100 | 976  | 532  | 20 | 31.01 | 6.16 | 50.49 |

|      |           |           |      |      |    |       |      |       |
|------|-----------|-----------|------|------|----|-------|------|-------|
| chr8 | 118745362 | 118746193 | 832  | 541  | 18 | 30.6  | 4.52 | 51.25 |
| chr8 | 118885557 | 118886411 | 855  | 593  | 19 | 33.51 | 4.93 | 48.65 |
| chr8 | 118983858 | 118984814 | 957  | 432  | 24 | 44.93 | 6.16 | 48.87 |
| chr8 | 119145624 | 119146674 | 1051 | 759  | 24 | 39.16 | 6.16 | 46.17 |
| chr8 | 119781351 | 119783018 | 1668 | 417  | 37 | 47.54 | 4.95 | 48.72 |
| chr8 | 119846041 | 119847143 | 1103 | 614  | 25 | 40.39 | 4.93 | 46.81 |
| chr8 | 120077317 | 120078253 | 937  | 591  | 22 | 37.27 | 5.75 | 46.57 |
| chr8 | 120347173 | 120348212 | 1040 | 681  | 22 | 31.68 | 6.57 | 49.85 |
| chr8 | 120577513 | 120578541 | 1029 | 635  | 21 | 32.23 | 4.93 | 50.02 |
| chr8 | 120786912 | 120789257 | 2346 | 1534 | 59 | 55.18 | 5.96 | 52.95 |
| chr8 | 121186034 | 121186835 | 802  | 262  | 18 | 32.32 | 4.52 | 50.01 |
| chr8 | 121536318 | 121537733 | 1416 | 488  | 31 | 35.86 | 3.84 | 46.98 |
| chr8 | 122055380 | 122056319 | 940  | 421  | 21 | 37.1  | 4.11 | 46.88 |
| chr8 | 122378351 | 122379179 | 829  | 336  | 18 | 30.77 | 5.34 | 50.95 |
| chr8 | 122624155 | 122625219 | 1065 | 779  | 22 | 30.45 | 5.34 | 51.29 |
| chr8 | 122773027 | 122773780 | 754  | 318  | 17 | 30.83 | 4.93 | 50.9  |
| chr8 | 123351781 | 123352394 | 614  | 247  | 17 | 31.89 | 5.14 | 49.85 |
| chr8 | 123427266 | 123428229 | 964  | 291  | 20 | 31.63 | 4.11 | 49.87 |
| chr8 | 123711586 | 123712622 | 1037 | 764  | 24 | 31.23 | 4.24 | 50.52 |
| chr8 | 123759665 | 123761060 | 1396 | 582  | 28 | 30.88 | 4.09 | 50.77 |
| chr8 | 123912639 | 123914147 | 1509 | 581  | 31 | 42.89 | 4.52 | 47.37 |
| chr8 | 123944449 | 123946054 | 1606 | 594  | 30 | 34.9  | 5.34 | 47.6  |
| chr8 | 124187533 | 124189605 | 2073 | 1221 | 48 | 72.68 | 6.16 | 57.78 |
| chr8 | 124273059 | 124275172 | 2114 | 1578 | 47 | 47.06 | 5.14 | 47.55 |
| chr8 | 124847856 | 124848549 | 694  | 402  | 16 | 30.06 | 5.75 | 51.46 |
| chr8 | 125363045 | 125364684 | 1640 | 484  | 34 | 38.23 | 4.95 | 46.3  |
| chr8 | 125390137 | 125391275 | 1139 | 586  | 26 | 35.61 | 5.16 | 47.32 |
| chr8 | 125441972 | 125442760 | 789  | 403  | 22 | 31.63 | 4.98 | 49.91 |
| chr8 | 125463352 | 125465030 | 1679 | 1218 | 37 | 37.58 | 3.73 | 45.93 |
| chr8 | 125595662 | 125596656 | 995  | 472  | 23 | 38.16 | 6.57 | 46.31 |
| chr8 | 125698411 | 125699564 | 1154 | 864  | 28 | 43.29 | 5.21 | 48.05 |
| chr8 | 125807750 | 125808629 | 880  | 591  | 20 | 36.34 | 4.52 | 47.09 |
| chr8 | 126021976 | 126025235 | 3260 | 2694 | 77 | 42    | 3.95 | 47.17 |
| chr8 | 126296582 | 126297341 | 760  | 286  | 17 | 30.48 | 4.52 | 51.27 |
| chr8 | 126501835 | 126503230 | 1396 | 688  | 33 | 53.01 | 8.63 | 50.82 |
| chr8 | 126562797 | 126564253 | 1457 | 746  | 37 | 35.23 | 4.85 | 47.25 |
| chr8 | 126752741 | 126754174 | 1434 | 660  | 33 | 36.94 | 5.48 | 46.89 |
| chr8 | 126792152 | 126793139 | 988  | 713  | 23 | 37.45 | 4.43 | 46.36 |
| chr8 | 126807023 | 126807630 | 608  | 340  | 15 | 31    | 4.93 | 50.54 |
| chr8 | 126872642 | 126873701 | 1060 | 546  | 22 | 30.69 | 4.93 | 51.01 |
| chr8 | 126923576 | 126924429 | 854  | 574  | 19 | 32.61 | 5.64 | 49.44 |
| chr8 | 126955443 | 126956319 | 877  | 278  | 19 | 32.26 | 4.11 | 49.99 |
| chr8 | 127207659 | 127208464 | 806  | 431  | 18 | 32.08 | 6.16 | 49.79 |
| chr8 | 127957755 | 127958570 | 816  | 290  | 20 | 40.42 | 5.34 | 46.89 |
| chr8 | 127999300 | 128000452 | 1153 | 411  | 24 | 33.76 | 4.52 | 48.7  |
| chr8 | 128024731 | 128025649 | 919  | 382  | 22 | 38.35 | 6.16 | 46.36 |
| chr8 | 128292807 | 128293473 | 667  | 338  | 16 | 31.75 | 5.75 | 49.79 |
| chr8 | 128790467 | 128791817 | 1351 | 735  | 27 | 33.6  | 6.77 | 48.74 |
| chr8 | 129155047 | 129155876 | 830  | 573  | 18 | 30.37 | 3.67 | 51.63 |
| chr8 | 129240965 | 129241828 | 864  | 289  | 19 | 30.37 | 4.28 | 51.63 |
| chr8 | 129595702 | 129597195 | 1494 | 327  | 31 | 30.91 | 3.08 | 50.59 |
| chr8 | 129613415 | 129614682 | 1268 | 692  | 31 | 55.91 | 8.15 | 53.05 |

|      |           |           |      |      |    |       |      |       |
|------|-----------|-----------|------|------|----|-------|------|-------|
| chr8 | 129904385 | 129905367 | 983  | 345  | 23 | 34.52 | 5.71 | 47.71 |
| chr8 | 130108435 | 130109560 | 1126 | 483  | 26 | 43.29 | 5.34 | 48    |
| chr8 | 130210862 | 130211977 | 1116 | 592  | 24 | 30.7  | 5.65 | 50.98 |
| chr8 | 130263485 | 130265095 | 1611 | 1102 | 33 | 33.78 | 5.15 | 48.67 |
| chr8 | 130280294 | 130281974 | 1681 | 1072 | 39 | 53.42 | 4.14 | 51.72 |
| chr8 | 130837379 | 130838378 | 1000 | 460  | 23 | 37.87 | 5.75 | 46.66 |
| chr8 | 132461862 | 132462614 | 753  | 267  | 18 | 35.34 | 4.52 | 47.46 |
| chr8 | 132655825 | 132656778 | 954  | 585  | 20 | 32.16 | 6.16 | 49.86 |
| chr8 | 133649850 | 133650822 | 973  | 358  | 20 | 31.17 | 4.52 | 50.55 |
| chr8 | 133677990 | 133678977 | 988  | 584  | 23 | 33.63 | 5.27 | 48.75 |
| chr8 | 133728878 | 133730520 | 1643 | 1067 | 33 | 34.77 | 4.95 | 47.59 |
| chr8 | 134037805 | 134038791 | 987  | 542  | 22 | 31    | 5.77 | 50.5  |
| chr8 | 135058519 | 135059579 | 1061 | 451  | 24 | 32.29 | 4.42 | 50.1  |
| chr8 | 135079311 | 135079940 | 630  | 277  | 17 | 39.2  | 5.34 | 46.26 |
| chr8 | 135284053 | 135284875 | 823  | 494  | 19 | 35.42 | 4.93 | 47.52 |
| chr8 | 136292009 | 136293047 | 1039 | 288  | 24 | 39.85 | 5.75 | 46.64 |
| chr8 | 136732421 | 136733038 | 618  | 350  | 15 | 30.33 | 5.34 | 51.64 |
| chr8 | 138205046 | 138205977 | 932  | 287  | 20 | 33.35 | 4.11 | 48.67 |
| chr8 | 139214387 | 139215505 | 1119 | 647  | 25 | 39.5  | 6.16 | 47    |
| chr8 | 140208669 | 140209373 | 705  | 275  | 19 | 34.06 | 5.14 | 48.45 |
| chr8 | 140633182 | 140634079 | 898  | 532  | 21 | 39.65 | 4.93 | 46.42 |
| chr8 | 141140957 | 141141681 | 725  | 401  | 17 | 32.59 | 4.93 | 49.4  |
| chr8 | 141411026 | 141412472 | 1447 | 722  | 36 | 61.23 | 8.06 | 55.64 |
| chr8 | 141441529 | 141442496 | 968  | 560  | 20 | 31.43 | 5.34 | 50.12 |
| chr8 | 141863694 | 141864804 | 1111 | 526  | 24 | 34.77 | 4.43 | 47.58 |
| chr8 | 141915856 | 141916605 | 750  | 424  | 20 | 45.16 | 6.98 | 48.97 |
| chr8 | 144623370 | 144624730 | 1361 | 969  | 32 | 38.67 | 4    | 46.09 |
| chr8 | 146017164 | 146018964 | 1801 | 447  | 48 | 40.27 | 5.53 | 46.85 |
| chr9 | 220693    | 221527    | 835  | 280  | 18 | 30.44 | 4.11 | 51.32 |
| chr9 | 562814    | 563819    | 1006 | 353  | 29 | 33.56 | 4.51 | 48.59 |
| chr9 | 815760    | 816643    | 884  | 638  | 19 | 31.87 | 4.11 | 49.75 |
| chr9 | 1278609   | 1279677   | 1069 | 783  | 24 | 38.15 | 4.93 | 46.25 |
| chr9 | 1426689   | 1427586   | 898  | 242  | 22 | 39.65 | 5.34 | 46.42 |
| chr9 | 1467453   | 1468398   | 946  | 489  | 29 | 71.04 | 9.45 | 53.7  |
| chr9 | 1480642   | 1481486   | 845  | 557  | 20 | 34.46 | 5.33 | 47.79 |
| chr9 | 1796893   | 1797884   | 992  | 518  | 20 | 30.21 | 4.52 | 51.73 |
| chr9 | 2697630   | 2698502   | 873  | 262  | 19 | 32.48 | 4.52 | 49.44 |
| chr9 | 3091964   | 3093232   | 1269 | 733  | 26 | 35.69 | 7.39 | 47.21 |
| chr9 | 3348316   | 3349272   | 957  | 263  | 21 | 32.03 | 4.95 | 49.77 |
| chr9 | 3490136   | 3491336   | 1201 | 617  | 30 | 47.84 | 4.42 | 49.24 |
| chr9 | 3732081   | 3732835   | 755  | 469  | 20 | 44.78 | 4.52 | 48.92 |
| chr9 | 4110440   | 4111730   | 1291 | 583  | 29 | 46.43 | 4.93 | 48.43 |
| chr9 | 4327323   | 4327936   | 614  | 327  | 16 | 35.39 | 5.34 | 47.62 |
| chr9 | 4679015   | 4680427   | 1413 | 919  | 35 | 33.84 | 3.54 | 48.75 |
| chr9 | 4703710   | 4704832   | 1123 | 542  | 28 | 31.62 | 4.24 | 49.94 |
| chr9 | 4796373   | 4798001   | 1629 | 917  | 40 | 35.55 | 4    | 47.18 |
| chr9 | 5072206   | 5073262   | 1057 | 553  | 22 | 30.84 | 5.34 | 50.83 |
| chr9 | 5548841   | 5550700   | 1860 | 629  | 42 | 48.96 | 4.24 | 50.27 |
| chr9 | 6025555   | 6027302   | 1748 | 268  | 36 | 38.45 | 3.72 | 46.45 |
| chr9 | 6182408   | 6183218   | 811  | 354  | 18 | 31.79 | 6.57 | 49.76 |
| chr9 | 6231012   | 6232696   | 1685 | 502  | 36 | 49.42 | 5.75 | 51.73 |
| chr9 | 6723302   | 6724552   | 1251 | 485  | 29 | 38.7  | 4.99 | 46.21 |

|      |          |          |      |      |    |       |      |       |
|------|----------|----------|------|------|----|-------|------|-------|
| chr9 | 8072807  | 8073679  | 873  | 261  | 20 | 36.77 | 6.98 | 46.92 |
| chr9 | 8218598  | 8219401  | 804  | 273  | 18 | 32.2  | 4.93 | 49.96 |
| chr9 | 8616086  | 8617196  | 1111 | 523  | 28 | 53.14 | 6.98 | 51.68 |
| chr9 | 9441833  | 9442840  | 1008 | 304  | 46 | 59.28 | 7.8  | 54.25 |
| chr9 | 9872098  | 9872814  | 717  | 455  | 17 | 33.1  | 4.93 | 49.21 |
| chr9 | 10952365 | 10953956 | 1592 | 537  | 32 | 42.63 | 3.7  | 47.34 |
| chr9 | 11057429 | 11058671 | 1243 | 667  | 25 | 33.2  | 5.75 | 49.09 |
| chr9 | 11176078 | 11177127 | 1050 | 416  | 23 | 35.1  | 4.93 | 47.39 |
| chr9 | 11193997 | 11194837 | 841  | 234  | 18 | 30.11 | 4.52 | 51.58 |
| chr9 | 11252280 | 11253247 | 968  | 595  | 20 | 31.43 | 4.93 | 50.12 |
| chr9 | 11582238 | 11583126 | 889  | 605  | 20 | 35.81 | 4.52 | 47.08 |
| chr9 | 11908134 | 11909024 | 891  | 630  | 19 | 31.48 | 5.34 | 49.85 |
| chr9 | 11975022 | 11976436 | 1415 | 876  | 32 | 51.9  | 4.93 | 51.04 |
| chr9 | 12224024 | 12225086 | 1063 | 628  | 24 | 34.03 | 4.95 | 48.6  |
| chr9 | 12448397 | 12449075 | 679  | 283  | 17 | 35.62 | 4.93 | 47.31 |
| chr9 | 12486737 | 12487780 | 1044 | 466  | 23 | 35.42 | 5.34 | 47.49 |
| chr9 | 12972462 | 12973426 | 965  | 675  | 24 | 39.7  | 6.09 | 46.54 |
| chr9 | 13088990 | 13089853 | 864  | 284  | 20 | 37.32 | 5.75 | 46.67 |
| chr9 | 13131654 | 13132581 | 928  | 266  | 21 | 37.81 | 5.34 | 46.63 |
| chr9 | 13548909 | 13549773 | 865  | 581  | 19 | 32.93 | 4.93 | 49.39 |
| chr9 | 13702332 | 13703235 | 904  | 486  | 19 | 30.79 | 5.75 | 50.91 |
| chr9 | 13735919 | 13736679 | 761  | 439  | 22 | 49.4  | 5.75 | 51.49 |
| chr9 | 13982694 | 13983819 | 1126 | 640  | 25 | 39.11 | 6.98 | 46.3  |
| chr9 | 14081311 | 14082151 | 841  | 495  | 18 | 30.11 | 4.93 | 51.58 |
| chr9 | 14094152 | 14094875 | 724  | 283  | 17 | 32.66 | 5.34 | 49.29 |
| chr9 | 14218413 | 14219163 | 751  | 477  | 17 | 31.01 | 4.52 | 50.5  |
| chr9 | 14489210 | 14490288 | 1079 | 449  | 24 | 37.6  | 4.93 | 45.8  |
| chr9 | 14616026 | 14617545 | 1520 | 887  | 37 | 43.2  | 4.28 | 47.52 |
| chr9 | 14745031 | 14746032 | 1002 | 258  | 21 | 33.63 | 4.11 | 48.79 |
| chr9 | 15132966 | 15133868 | 903  | 428  | 20 | 33.98 | 4.83 | 48.57 |
| chr9 | 15518060 | 15519357 | 1298 | 584  | 27 | 38.06 | 5.34 | 46.43 |
| chr9 | 15551598 | 15553420 | 1823 | 543  | 42 | 39.41 | 3.74 | 47.02 |
| chr9 | 16362804 | 16363785 | 982  | 642  | 24 | 32.56 | 4.45 | 49.35 |
| chr9 | 16949088 | 16949834 | 747  | 396  | 17 | 30.39 | 4.83 | 51.62 |
| chr9 | 17013881 | 17015023 | 1143 | 609  | 23 | 30.49 | 4.52 | 51.27 |
| chr9 | 17242739 | 17243780 | 1042 | 623  | 21 | 30.58 | 5.24 | 51.21 |
| chr9 | 17307985 | 17309596 | 1612 | 866  | 44 | 45.81 | 4.28 | 49.85 |
| chr9 | 17412993 | 17413929 | 937  | 262  | 21 | 36.21 | 4.83 | 46.94 |
| chr9 | 18126600 | 18127611 | 1012 | 587  | 24 | 40.28 | 5.64 | 46.87 |
| chr9 | 19232038 | 19233577 | 1540 | 866  | 37 | 34.92 | 4.21 | 47.6  |
| chr9 | 19307701 | 19308587 | 887  | 286  | 21 | 33.74 | 4.01 | 48.65 |
| chr9 | 19342212 | 19343174 | 963  | 281  | 30 | 45.29 | 4.57 | 49.35 |
| chr9 | 19628638 | 19629660 | 1023 | 401  | 22 | 32.54 | 6.57 | 49.37 |
| chr9 | 19870609 | 19871825 | 1217 | 520  | 28 | 41.15 | 5.71 | 46.33 |
| chr9 | 20571034 | 20571818 | 785  | 262  | 21 | 37.01 | 3.77 | 46.94 |
| chr9 | 20591696 | 20592519 | 824  | 579  | 18 | 31.05 | 4.52 | 50.62 |
| chr9 | 20937410 | 20938411 | 1002 | 378  | 23 | 33.46 | 6.09 | 48.58 |
| chr9 | 21140551 | 21141489 | 939  | 659  | 23 | 41.55 | 4.93 | 47.17 |
| chr9 | 21432046 | 21433218 | 1173 | 537  | 24 | 32.79 | 5.75 | 49.41 |
| chr9 | 21727476 | 21728011 | 536  | 268  | 15 | 37.66 | 6.16 | 46.06 |
| chr9 | 21854777 | 21856394 | 1618 | 1327 | 31 | 32.59 | 3.81 | 49.42 |
| chr9 | 22028877 | 22030713 | 1837 | 599  | 38 | 39.35 | 4.74 | 46.8  |

|      |          |          |      |      |    |       |      |       |
|------|----------|----------|------|------|----|-------|------|-------|
| chr9 | 22097319 | 22098957 | 1639 | 1302 | 36 | 45.33 | 6.09 | 49.42 |
| chr9 | 22234452 | 22235699 | 1248 | 702  | 27 | 34.33 | 5.96 | 47.78 |
| chr9 | 22272906 | 22273896 | 991  | 747  | 20 | 30.26 | 4.11 | 51.67 |
| chr9 | 22301286 | 22302114 | 829  | 282  | 18 | 30.77 | 3.7  | 50.95 |
| chr9 | 22412697 | 22413581 | 885  | 611  | 24 | 49.95 | 5.34 | 51.7  |
| chr9 | 22442455 | 22443186 | 732  | 336  | 17 | 32.16 | 5.75 | 49.88 |
| chr9 | 22939560 | 22940421 | 862  | 596  | 21 | 41.99 | 5.75 | 47.06 |
| chr9 | 22968344 | 22970207 | 1864 | 1505 | 39 | 59.75 | 4.93 | 56.6  |
| chr9 | 22975290 | 22976601 | 1312 | 545  | 25 | 30.13 | 5.75 | 51.65 |
| chr9 | 23024447 | 23025629 | 1183 | 612  | 24 | 32.31 | 6.16 | 50.07 |
| chr9 | 23187545 | 23188562 | 1018 | 762  | 26 | 32.28 | 4.98 | 50.03 |
| chr9 | 23696565 | 23697456 | 892  | 279  | 20 | 35.63 | 4.93 | 47.33 |
| chr9 | 24453964 | 24454967 | 1004 | 269  | 21 | 33.53 | 4.52 | 48.64 |
| chr9 | 24518021 | 24519677 | 1657 | 969  | 40 | 41.33 | 3.42 | 46.8  |
| chr9 | 25153604 | 25154322 | 719  | 248  | 18 | 37.62 | 4.52 | 45.78 |
| chr9 | 25711270 | 25712242 | 973  | 619  | 22 | 35.21 | 4.52 | 47.21 |
| chr9 | 25737580 | 25738615 | 1036 | 435  | 21 | 31.88 | 5.75 | 49.76 |
| chr9 | 25968253 | 25969215 | 963  | 450  | 22 | 31.13 | 4.52 | 50.63 |
| chr9 | 26263692 | 26265863 | 2172 | 1507 | 41 | 34.1  | 5.05 | 48.13 |
| chr9 | 26476146 | 26477110 | 965  | 683  | 22 | 34.62 | 4.83 | 47.77 |
| chr9 | 26581186 | 26582462 | 1277 | 580  | 26 | 35.3  | 4.93 | 47.41 |
| chr9 | 26623838 | 26624642 | 805  | 237  | 18 | 32.14 | 4.52 | 49.83 |
| chr9 | 26875287 | 26876136 | 850  | 278  | 19 | 33.8  | 4.11 | 48.83 |
| chr9 | 26926662 | 26927981 | 1320 | 576  | 36 | 46.64 | 4.67 | 47.33 |
| chr9 | 27064981 | 27065808 | 828  | 450  | 19 | 34.14 | 5.24 | 48.01 |
| chr9 | 27402652 | 27403396 | 745  | 454  | 18 | 35.86 | 4.93 | 47    |
| chr9 | 27562760 | 27565351 | 2592 | 1977 | 63 | 32.66 | 3.91 | 49.31 |
| chr9 | 28586611 | 28587401 | 791  | 518  | 22 | 31.5  | 4.67 | 49.85 |
| chr9 | 28713114 | 28713990 | 877  | 369  | 19 | 32.26 | 4.93 | 49.99 |
| chr9 | 29092335 | 29093236 | 902  | 262  | 20 | 35.04 | 4.93 | 47.43 |
| chr9 | 29165626 | 29166425 | 800  | 512  | 18 | 32.44 | 6.16 | 49.55 |
| chr9 | 29224266 | 29225101 | 836  | 522  | 20 | 39.1  | 4.93 | 46.36 |
| chr9 | 30326124 | 30327327 | 1204 | 633  | 24 | 31.34 | 6.16 | 50.18 |
| chr9 | 30357483 | 30358459 | 977  | 534  | 20 | 30.96 | 4.52 | 50.47 |
| chr9 | 30708188 | 30709244 | 1057 | 283  | 21 | 30.84 | 4.52 | 50.83 |
| chr9 | 30745922 | 30747216 | 1295 | 701  | 25 | 30.86 | 5.75 | 50.94 |
| chr9 | 31145186 | 31146350 | 1165 | 607  | 25 | 37.03 | 4.93 | 46.99 |
| chr9 | 31636778 | 31637460 | 683  | 283  | 17 | 35.35 | 4.11 | 47.45 |
| chr9 | 32795363 | 32796223 | 861  | 577  | 20 | 37.51 | 6.16 | 46.02 |
| chr9 | 32967422 | 32969082 | 1661 | 628  | 32 | 39.47 | 4.11 | 47.03 |
| chr9 | 33352134 | 33353705 | 1572 | 359  | 37 | 44.49 | 5.19 | 48.57 |
| chr9 | 33522644 | 33523644 | 1001 | 524  | 21 | 33.69 | 5.75 | 48.59 |
| chr9 | 33685179 | 33686260 | 1082 | 792  | 26 | 45.95 | 5.34 | 49.57 |
| chr9 | 33829607 | 33830391 | 785  | 408  | 20 | 42.58 | 6.57 | 47.14 |
| chr9 | 33873840 | 33874948 | 1109 | 641  | 27 | 32.31 | 3.84 | 50.06 |
| chr9 | 33984427 | 33985503 | 1077 | 501  | 24 | 32.06 | 4.84 | 49.82 |
| chr9 | 34042140 | 34043009 | 870  | 600  | 20 | 32.96 | 4.95 | 49.28 |
| chr9 | 34086646 | 34087894 | 1249 | 568  | 25 | 32.92 | 6.16 | 49.3  |
| chr9 | 34171258 | 34172660 | 1403 | 762  | 29 | 40.51 | 8.22 | 46.93 |
| chr9 | 34670852 | 34671810 | 959  | 495  | 20 | 31.9  | 4.11 | 49.83 |
| chr9 | 35188973 | 35189834 | 862  | 277  | 20 | 35.19 | 4.33 | 47.16 |
| chr9 | 35256163 | 35257140 | 978  | 728  | 21 | 34.93 | 4.52 | 47.58 |

|      |          |          |      |      |     |       |      |       |
|------|----------|----------|------|------|-----|-------|------|-------|
| chr9 | 35272306 | 35273263 | 958  | 352  | 21  | 36.06 | 6.16 | 46.97 |
| chr9 | 35435963 | 35437214 | 1252 | 708  | 29  | 46.41 | 5.58 | 48.43 |
| chr9 | 35649240 | 35650707 | 1468 | 1179 | 33  | 33.9  | 4.36 | 48.67 |
| chr9 | 35770868 | 35772655 | 1788 | 1009 | 36  | 33.56 | 4.11 | 48.57 |
| chr9 | 35940315 | 35941079 | 765  | 252  | 17  | 30.19 | 4.52 | 51.7  |
| chr9 | 36024379 | 36025097 | 719  | 364  | 18  | 37.62 | 5.34 | 45.78 |
| chr9 | 36097302 | 36098341 | 1040 | 484  | 23  | 35.64 | 4.52 | 47.28 |
| chr9 | 36266856 | 36267611 | 756  | 501  | 17  | 30.71 | 5.75 | 51.03 |
| chr9 | 36442304 | 36443805 | 1502 | 646  | 33  | 36.55 | 4.64 | 46.87 |
| chr9 | 36454813 | 36455714 | 902  | 659  | 21  | 38.32 | 4.43 | 46.47 |
| chr9 | 37207555 | 37209356 | 1802 | 935  | 51  | 65.06 | 5.76 | 53.89 |
| chr9 | 38319324 | 38320323 | 1000 | 564  | 21  | 33.74 | 4.93 | 48.62 |
| chr9 | 38531407 | 38532537 | 1131 | 532  | 30  | 58.71 | 5.58 | 52.38 |
| chr9 | 40292968 | 40294337 | 1370 | 710  | 29  | 42.17 | 6.57 | 47.03 |
| chr9 | 40547904 | 40548810 | 907  | 222  | 19  | 30.63 | 4.52 | 51.2  |
| chr9 | 41918697 | 41919464 | 768  | 491  | 19  | 32.36 | 3.97 | 49.82 |
| chr9 | 42507931 | 42508919 | 989  | 399  | 22  | 34.33 | 4.93 | 47.78 |
| chr9 | 42949937 | 42951713 | 1777 | 989  | 50  | 33.8  | 4.11 | 48.85 |
| chr9 | 43392160 | 43392913 | 754  | 393  | 18  | 35.28 | 4.93 | 47.34 |
| chr9 | 43492461 | 43493115 | 655  | 327  | 16  | 32.54 | 4.93 | 49.34 |
| chr9 | 43547073 | 43547985 | 913  | 632  | 19  | 30.31 | 4.93 | 51.54 |
| chr9 | 44329344 | 44329859 | 516  | 258  | 15  | 42.93 | 6.16 | 47.38 |
| chr9 | 44897401 | 44898427 | 1027 | 289  | 29  | 31.76 | 4.48 | 49.85 |
| chr9 | 44958874 | 44960145 | 1272 | 696  | 28  | 43.37 | 4.52 | 47.92 |
| chr9 | 45632440 | 45632981 | 542  | 271  | 18  | 34.36 | 5.14 | 47.84 |
| chr9 | 45645414 | 45647429 | 2016 | 654  | 43  | 53.92 | 7.66 | 52.74 |
| chr9 | 45670342 | 45671417 | 1076 | 280  | 23  | 33.75 | 4.52 | 48.7  |
| chr9 | 46062645 | 46063589 | 945  | 264  | 23  | 30.94 | 4.11 | 50.61 |
| chr9 | 46438022 | 46439333 | 1312 | 654  | 33  | 51.83 | 7.23 | 51.17 |
| chr9 | 46564202 | 46564961 | 760  | 492  | 17  | 30.48 | 4.11 | 51.27 |
| chr9 | 46899526 | 46901576 | 2051 | 735  | 50  | 57.21 | 5.65 | 53.3  |
| chr9 | 47170894 | 47171677 | 784  | 317  | 21  | 38.2  | 5.24 | 46.41 |
| chr9 | 65781186 | 65782091 | 906  | 449  | 22  | 34.93 | 6.09 | 47.64 |
| chr9 | 66302852 | 66303757 | 906  | 589  | 20  | 32.04 | 6.62 | 49.77 |
| chr9 | 66544469 | 66546217 | 1749 | 1469 | 31  | 33.59 | 3.98 | 48.73 |
| chr9 | 66730290 | 66731195 | 906  | 625  | 19  | 30.68 | 4.52 | 51.01 |
| chr9 | 66848322 | 66853860 | 5539 | 2530 | 184 | 31.14 | 3.67 | 50.67 |
| chr9 | 66918609 | 66920488 | 1880 | 1146 | 50  | 70.76 | 5.14 | 54.13 |
| chr9 | 67053553 | 67055006 | 1454 | 870  | 37  | 50.3  | 6.85 | 51.78 |
| chr9 | 67227477 | 67228673 | 1197 | 705  | 33  | 31.3  | 6.32 | 50.34 |
| chr9 | 67291999 | 67295006 | 3008 | 1247 | 92  | 37.78 | 3.18 | 46.67 |
| chr9 | 67308864 | 67311806 | 2943 | 1627 | 73  | 33.75 | 4.69 | 48.69 |
| chr9 | 68259480 | 68260511 | 1032 | 623  | 24  | 40.26 | 6.57 | 46.78 |
| chr9 | 68993123 | 68995687 | 2565 | 641  | 55  | 31.29 | 3.37 | 50.33 |
| chr9 | 69194805 | 69195683 | 879  | 273  | 23  | 40.28 | 5.65 | 46.89 |
| chr9 | 69330800 | 69331962 | 1163 | 434  | 25  | 37.14 | 5.75 | 46.91 |
| chr9 | 69719412 | 69720197 | 786  | 498  | 18  | 33.27 | 4.93 | 48.88 |
| chr9 | 69858123 | 69859238 | 1116 | 296  | 29  | 43.82 | 4.79 | 47.93 |
| chr9 | 70324121 | 70325002 | 882  | 465  | 19  | 31.98 | 4.52 | 49.78 |
| chr9 | 70355954 | 70357316 | 1363 | 1138 | 31  | 50.69 | 4.52 | 51.52 |
| chr9 | 70453223 | 70454540 | 1318 | 488  | 31  | 51.83 | 5.64 | 51.1  |
| chr9 | 70638386 | 70640718 | 2333 | 1644 | 54  | 32.34 | 3.81 | 49.91 |



|      |          |          |      |      |    |       |      |       |
|------|----------|----------|------|------|----|-------|------|-------|
| chr9 | 71113492 | 71114203 | 712  | 287  | 23 | 59.08 | 9.04 | 52.83 |
| chr9 | 71311571 | 71312341 | 771  | 288  | 20 | 43.59 | 5.34 | 47.61 |
| chr9 | 72013529 | 72014474 | 946  | 288  | 20 | 32.59 | 4.52 | 49.31 |
| chr9 | 72167891 | 72168568 | 678  | 399  | 16 | 31.05 | 5.34 | 50.56 |
| chr9 | 72747827 | 72748394 | 568  | 284  | 15 | 32.66 | 6.16 | 49.32 |
| chr9 | 72876374 | 72878479 | 2106 | 363  | 50 | 50.2  | 4.16 | 51.25 |
| chr9 | 72928906 | 72929865 | 960  | 356  | 23 | 40.24 | 7.8  | 46.69 |
| chr9 | 73237667 | 73239062 | 1396 | 667  | 30 | 44.76 | 4.93 | 48.82 |
| chr9 | 73576559 | 73577465 | 907  | 281  | 21 | 39.09 | 6.57 | 46.3  |
| chr9 | 74695507 | 74696423 | 917  | 500  | 21 | 38.48 | 5.34 | 46.32 |
| chr9 | 75167778 | 75169060 | 1283 | 811  | 30 | 51.15 | 6.98 | 51.79 |
| chr9 | 76110593 | 76111532 | 940  | 277  | 20 | 32.91 | 4.52 | 49.24 |
| chr9 | 76409060 | 76410407 | 1348 | 763  | 28 | 34.42 | 4.57 | 47.8  |
| chr9 | 76552791 | 76553979 | 1189 | 727  | 24 | 32.03 | 5.34 | 49.79 |
| chr9 | 76567157 | 76567888 | 732  | 269  | 17 | 32.16 | 6.57 | 49.88 |
| chr9 | 76625484 | 76626344 | 861  | 572  | 19 | 33.16 | 4.93 | 49.11 |
| chr9 | 77763625 | 77764399 | 775  | 345  | 20 | 43.3  | 6.57 | 48.08 |
| chr9 | 78077331 | 78078339 | 1009 | 634  | 23 | 37.35 | 4.11 | 46.8  |
| chr9 | 78334754 | 78335726 | 973  | 541  | 21 | 35.21 | 4.93 | 47.21 |
| chr9 | 78639793 | 78641043 | 1251 | 562  | 28 | 35.74 | 4.69 | 47.15 |
| chr9 | 79179026 | 79179881 | 856  | 582  | 19 | 33.45 | 4.93 | 48.63 |
| chr9 | 79449556 | 79450521 | 966  | 679  | 20 | 31.53 | 4.11 | 49.91 |
| chr9 | 79803754 | 79805263 | 1510 | 585  | 31 | 30.22 | 4.79 | 51.74 |
| chr9 | 79941096 | 79943018 | 1923 | 1237 | 41 | 56.66 | 6.16 | 53.51 |
| chr9 | 80103231 | 80103982 | 752  | 355  | 18 | 31.75 | 4.19 | 49.81 |
| chr9 | 80706095 | 80707308 | 1214 | 709  | 25 | 34.58 | 5.34 | 47.7  |
| chr9 | 81124745 | 81125622 | 878  | 266  | 20 | 32.49 | 4.95 | 49.46 |
| chr9 | 81724104 | 81725158 | 1055 | 615  | 22 | 30.94 | 5.75 | 50.6  |
| chr9 | 81739284 | 81740161 | 878  | 592  | 22 | 35.97 | 4.89 | 47.05 |
| chr9 | 81966051 | 81967267 | 1217 | 604  | 26 | 38.28 | 4.93 | 46.29 |
| chr9 | 82051025 | 82052370 | 1346 | 689  | 31 | 51.69 | 7.8  | 51.3  |
| chr9 | 82257418 | 82258463 | 1046 | 509  | 22 | 30.99 | 5.3  | 50.49 |
| chr9 | 83569573 | 83570138 | 566  | 283  | 15 | 37.66 | 6.16 | 46.06 |
| chr9 | 83639948 | 83640739 | 792  | 271  | 18 | 32.91 | 6.16 | 49.22 |
| chr9 | 84494456 | 84495262 | 807  | 203  | 19 | 36.42 | 5.34 | 47.16 |
| chr9 | 85068948 | 85069704 | 757  | 492  | 17 | 30.65 | 4.93 | 51.07 |
| chr9 | 86161409 | 86163320 | 1912 | 494  | 41 | 57.22 | 6.16 | 52.93 |
| chr9 | 86188233 | 86189289 | 1057 | 489  | 26 | 47.53 | 5.34 | 48.68 |
| chr9 | 86477365 | 86478664 | 1300 | 787  | 31 | 54.49 | 6.16 | 54.13 |
| chr9 | 86570677 | 86572178 | 1502 | 657  | 40 | 35.64 | 4.48 | 47.27 |
| chr9 | 86579842 | 86580984 | 1143 | 693  | 27 | 34.61 | 4.11 | 47.73 |
| chr9 | 86706770 | 86707698 | 929  | 516  | 20 | 33.51 | 4.52 | 48.66 |
| chr9 | 86771236 | 86772458 | 1223 | 665  | 28 | 40.82 | 4.57 | 46.35 |
| chr9 | 86780031 | 86781098 | 1068 | 408  | 21 | 30.31 | 5.34 | 51.54 |
| chr9 | 87337809 | 87339441 | 1633 | 718  | 42 | 67.56 | 5.59 | 54.55 |
| chr9 | 87366681 | 87367678 | 998  | 364  | 23 | 37.98 | 5.75 | 46.41 |
| chr9 | 87479810 | 87482548 | 2739 | 839  | 86 | 33.3  | 2.88 | 48.79 |
| chr9 | 88271322 | 88272704 | 1383 | 877  | 31 | 38.23 | 3.53 | 46.29 |
| chr9 | 88346514 | 88348082 | 1569 | 1002 | 36 | 42.79 | 4.24 | 47.4  |
| chr9 | 88490416 | 88492046 | 1631 | 1447 | 31 | 37.27 | 4.11 | 46.55 |
| chr9 | 88597995 | 88600223 | 2229 | 993  | 45 | 45.66 | 4.57 | 49.74 |
| chr9 | 88629496 | 88632039 | 2544 | 2255 | 54 | 44.97 | 3.73 | 48.89 |

|      |           |           |      |      |    |       |      |       |
|------|-----------|-----------|------|------|----|-------|------|-------|
| chr9 | 88857485  | 88858358  | 874  | 587  | 19 | 32.42 | 4.93 | 49.55 |
| chr9 | 88963034  | 88964210  | 1177 | 826  | 33 | 48.93 | 5.6  | 50.43 |
| chr9 | 90899674  | 90900412  | 739  | 510  | 17 | 31.73 | 4.93 | 49.74 |
| chr9 | 91478180  | 91479145  | 966  | 691  | 20 | 31.53 | 6.16 | 49.91 |
| chr9 | 91530353  | 91531461  | 1109 | 666  | 23 | 32.1  | 6.57 | 49.73 |
| chr9 | 92217363  | 92218593  | 1231 | 575  | 28 | 45.67 | 6.57 | 49.85 |
| chr9 | 93266136  | 93267952  | 1817 | 489  | 33 | 33.1  | 5.34 | 49.16 |
| chr9 | 93413961  | 93415106  | 1146 | 596  | 26 | 42.14 | 5.75 | 46.93 |
| chr9 | 93631538  | 93633361  | 1824 | 508  | 37 | 34.34 | 4.94 | 47.91 |
| chr9 | 93691106  | 93692012  | 907  | 623  | 20 | 34.75 | 5.75 | 47.62 |
| chr9 | 94016147  | 94016872  | 726  | 447  | 17 | 32.53 | 4.93 | 49.39 |
| chr9 | 95017530  | 95018422  | 893  | 435  | 20 | 30    | 5.52 | 51.46 |
| chr9 | 95297082  | 95298516  | 1435 | 939  | 32 | 50.76 | 5.75 | 51.6  |
| chr9 | 95494830  | 95495752  | 923  | 392  | 22 | 33.94 | 4.57 | 48.66 |
| chr9 | 95896454  | 95897291  | 838  | 599  | 19 | 34.51 | 5.34 | 47.68 |
| chr9 | 96133590  | 96134381  | 792  | 508  | 18 | 32.91 | 5.75 | 49.22 |
| chr9 | 96191003  | 96192288  | 1286 | 599  | 25 | 31.25 | 5.75 | 50.49 |
| chr9 | 96768672  | 96769502  | 831  | 278  | 18 | 30.66 | 4.11 | 51.04 |
| chr9 | 97053702  | 97054756  | 1055 | 553  | 22 | 30.94 | 5.34 | 50.6  |
| chr9 | 97611278  | 97612193  | 916  | 240  | 24 | 47.72 | 8.22 | 49.11 |
| chr9 | 97656488  | 97657163  | 676  | 284  | 16 | 31.17 | 4.93 | 50.55 |
| chr9 | 98216685  | 98217434  | 750  | 279  | 17 | 30.21 | 5.64 | 51.7  |
| chr9 | 98612574  | 98613618  | 1045 | 453  | 21 | 31.43 | 4.93 | 50.04 |
| chr9 | 99100777  | 99101823  | 1047 | 445  | 21 | 30.94 | 5.3  | 50.54 |
| chr9 | 99108762  | 99109954  | 1193 | 585  | 25 | 35.61 | 4.11 | 47.36 |
| chr9 | 99120363  | 99121457  | 1095 | 804  | 24 | 31.15 | 4.09 | 50.63 |
| chr9 | 99146858  | 99148187  | 1330 | 798  | 28 | 35.28 | 5.71 | 47.39 |
| chr9 | 99512204  | 99513630  | 1427 | 616  | 31 | 33.95 | 5.14 | 48.65 |
| chr9 | 99730892  | 99731978  | 1087 | 606  | 24 | 30.37 | 3.64 | 51.64 |
| chr9 | 99801162  | 99801993  | 832  | 571  | 20 | 38.95 | 5.3  | 46.14 |
| chr9 | 99939910  | 99940604  | 695  | 258  | 18 | 37.19 | 6.3  | 46.85 |
| chr9 | 100175099 | 100176970 | 1872 | 996  | 48 | 43.43 | 4.25 | 47.91 |
| chr9 | 100588975 | 100590269 | 1295 | 693  | 26 | 31.92 | 5.9  | 49.81 |
| chr9 | 102122111 | 102122872 | 762  | 502  | 18 | 34.76 | 4.93 | 47.61 |
| chr9 | 102367643 | 102368462 | 820  | 516  | 18 | 31.28 | 4.52 | 50.36 |
| chr9 | 102612644 | 102613776 | 1133 | 377  | 24 | 34.75 | 6.57 | 47.62 |
| chr9 | 102622622 | 102623341 | 720  | 262  | 19 | 42.42 | 5.34 | 47.21 |
| chr9 | 103189813 | 103191963 | 2151 | 1563 | 40 | 37.23 | 5.39 | 46.7  |
| chr9 | 103548837 | 103549724 | 888  | 261  | 20 | 35.47 | 4.89 | 47.43 |
| chr9 | 104020019 | 104021558 | 1540 | 272  | 31 | 41.39 | 4.11 | 46.93 |
| chr9 | 104440442 | 104441427 | 986  | 348  | 20 | 30.51 | 4.11 | 51.28 |
| chr9 | 104486927 | 104488208 | 1282 | 741  | 30 | 51.21 | 6.57 | 51.46 |
| chr9 | 105395777 | 105396752 | 976  | 382  | 21 | 35.04 | 6.57 | 47.48 |
| chr9 | 105464863 | 105465841 | 979  | 425  | 21 | 34.88 | 4.93 | 47.64 |
| chr9 | 105640420 | 105640980 | 561  | 280  | 15 | 37.66 | 6.16 | 46.06 |
| chr9 | 105755951 | 105756855 | 905  | 640  | 21 | 39.22 | 4.52 | 46.37 |
| chr9 | 106137805 | 106138546 | 742  | 461  | 17 | 31.55 | 4.93 | 49.94 |
| chr9 | 106254905 | 106255576 | 672  | 320  | 16 | 31.43 | 4.93 | 50.09 |
| chr9 | 106510431 | 106511280 | 850  | 593  | 19 | 33.8  | 4.93 | 48.83 |
| chr9 | 106740726 | 106741657 | 932  | 382  | 20 | 33.35 | 5.75 | 48.67 |
| chr9 | 107408498 | 107409394 | 897  | 616  | 19 | 31.16 | 4.52 | 50.56 |
| chr9 | 107450721 | 107451509 | 789  | 258  | 18 | 33.09 | 4.52 | 49.16 |

|      |           |           |      |      |    |       |      |       |
|------|-----------|-----------|------|------|----|-------|------|-------|
| chr9 | 107493634 | 107494462 | 829  | 270  | 18 | 30.77 | 5.34 | 50.95 |
| chr9 | 107509529 | 107510961 | 1433 | 876  | 37 | 36.5  | 4    | 47.03 |
| chr9 | 107552833 | 107553876 | 1044 | 563  | 21 | 31.48 | 4.93 | 49.97 |
| chr9 | 107663174 | 107664091 | 918  | 284  | 19 | 30.05 | 4.11 | 51.47 |
| chr9 | 107723259 | 107724159 | 901  | 627  | 20 | 35.1  | 4.11 | 47.35 |
| chr9 | 107742603 | 107743449 | 847  | 406  | 20 | 34.34 | 6.47 | 47.88 |
| chr9 | 107828664 | 107829656 | 993  | 595  | 20 | 30.16 | 5.75 | 51.68 |
| chr9 | 107923206 | 107924163 | 958  | 270  | 20 | 31.95 | 6.98 | 49.8  |
| chr9 | 108439633 | 108441084 | 1452 | 830  | 34 | 35.87 | 4.89 | 47.02 |
| chr9 | 108462874 | 108464151 | 1278 | 799  | 30 | 32.89 | 5.39 | 49.35 |
| chr9 | 108815952 | 108816766 | 815  | 542  | 18 | 31.56 | 5.34 | 49.92 |
| chr9 | 108986419 | 108987289 | 871  | 261  | 19 | 32.59 | 4.52 | 49.42 |
| chr9 | 109484719 | 109485697 | 979  | 691  | 20 | 30.86 | 4.93 | 50.91 |
| chr9 | 109627685 | 109628426 | 742  | 261  | 17 | 31.55 | 4.52 | 49.94 |
| chr9 | 110086664 | 110087468 | 805  | 519  | 20 | 40.76 | 6.93 | 46.54 |
| chr9 | 110450086 | 110451305 | 1220 | 521  | 25 | 34.29 | 6.16 | 47.84 |
| chr9 | 110690249 | 110691178 | 930  | 352  | 21 | 37.69 | 4.52 | 46.43 |
| chr9 | 111096842 | 111097913 | 1072 | 538  | 22 | 30.12 | 6.57 | 51.63 |
| chr9 | 111253040 | 111253943 | 904  | 456  | 19 | 30.79 | 5.34 | 50.91 |
| chr9 | 111298744 | 111299863 | 1120 | 669  | 25 | 39.44 | 6.98 | 47.06 |
| chr9 | 111388734 | 111389890 | 1157 | 511  | 27 | 45.74 | 6.57 | 49.92 |
| chr9 | 111612998 | 111613657 | 660  | 273  | 18 | 41.97 | 6.98 | 47.12 |
| chr9 | 112385139 | 112386239 | 1101 | 488  | 24 | 36.41 | 4.93 | 47.19 |
| chr9 | 113289711 | 113290629 | 919  | 711  | 23 | 32.43 | 4.45 | 49.55 |
| chr9 | 113297753 | 113298783 | 1031 | 405  | 21 | 32.13 | 4.52 | 49.78 |
| chr9 | 113404549 | 113405418 | 870  | 248  | 19 | 31.14 | 5.18 | 50.63 |
| chr9 | 113868431 | 113869753 | 1323 | 938  | 31 | 53.07 | 5.75 | 51.58 |
| chr9 | 114181654 | 114183000 | 1347 | 789  | 31 | 36.55 | 6.04 | 46.88 |
| chr9 | 114234684 | 114235715 | 1032 | 665  | 25 | 33.44 | 4.79 | 48.61 |
| chr9 | 114392769 | 114393990 | 1222 | 510  | 26 | 33.35 | 5.71 | 48.68 |
| chr9 | 114677973 | 114678657 | 685  | 278  | 17 | 32.21 | 5    | 49.94 |
| chr9 | 114939339 | 114940176 | 838  | 344  | 18 | 30.27 | 5.34 | 51.68 |
| chr9 | 115003226 | 115004601 | 1376 | 877  | 30 | 45.83 | 5.34 | 50    |
| chr9 | 115235596 | 115236258 | 663  | 279  | 16 | 32.01 | 5.34 | 49.76 |
| chr9 | 115324381 | 115327094 | 2714 | 1989 | 66 | 52.53 | 5.42 | 50.08 |
| chr9 | 115467616 | 115469020 | 1405 | 588  | 35 | 31.84 | 5.42 | 49.71 |
| chr9 | 115601676 | 115602738 | 1063 | 285  | 22 | 30.55 | 5.75 | 51.18 |
| chr9 | 115842045 | 115843239 | 1195 | 645  | 29 | 32.74 | 5.29 | 49.38 |
| chr9 | 115940975 | 115941846 | 872  | 592  | 20 | 36.83 | 4.93 | 46.86 |
| chr9 | 116459987 | 116460806 | 820  | 312  | 20 | 40.15 | 5.75 | 46.72 |
| chr9 | 116520142 | 116521232 | 1091 | 453  | 23 | 32.99 | 5.34 | 49.23 |
| chr9 | 117303913 | 117305080 | 1168 | 636  | 24 | 33.03 | 5.75 | 49.12 |
| chr9 | 117665419 | 117666490 | 1072 | 511  | 23 | 31.64 | 5.12 | 49.89 |
| chr9 | 118644216 | 118645008 | 793  | 505  | 18 | 32.85 | 4.52 | 49.28 |
| chr9 | 118715652 | 118716474 | 823  | 549  | 18 | 31.11 | 4.11 | 50.68 |
| chr9 | 118930010 | 118930745 | 736  | 461  | 18 | 36.46 | 5.75 | 47.14 |
| chr9 | 119662941 | 119663614 | 674  | 386  | 16 | 31.3  | 5.75 | 50.33 |
| chr9 | 121326275 | 121327210 | 936  | 340  | 23 | 41.74 | 5.75 | 47.25 |
| chr9 | 121449046 | 121449624 | 579  | 289  | 15 | 32.66 | 6.16 | 49.32 |
| chr9 | 122486644 | 122487827 | 1184 | 747  | 24 | 32.27 | 5.34 | 50.08 |
| chr9 | 123176105 | 123177310 | 1206 | 716  | 24 | 31.25 | 6.16 | 50.5  |
| chr9 | 123409912 | 123411341 | 1430 | 621  | 33 | 30.58 | 4.05 | 51.2  |

|      |           |           |      |      |    |       |      |       |
|------|-----------|-----------|------|------|----|-------|------|-------|
| chr9 | 123545068 | 123546022 | 955  | 487  | 21 | 35.18 | 5.24 | 47.08 |
| chr9 | 123593287 | 123594398 | 1112 | 449  | 25 | 35.24 | 4.95 | 47.29 |
| chr9 | 123731369 | 123732753 | 1385 | 567  | 38 | 76.77 | 7.39 | 54.93 |
| chr9 | 123760899 | 123761718 | 820  | 529  | 18 | 31.28 | 6.57 | 50.36 |
| chr9 | 123763149 | 123764289 | 1141 | 402  | 26 | 42.42 | 7.8  | 47.23 |
| chr9 | 123847497 | 123848369 | 873  | 587  | 20 | 32.22 | 4.14 | 50.01 |
| chr9 | 124084970 | 124085777 | 808  | 441  | 18 | 31.97 | 4.52 | 49.79 |
| chr9 | 124259719 | 124261030 | 1312 | 672  | 27 | 32.61 | 5.71 | 49.38 |
| chr9 | 124282611 | 124283727 | 1117 | 400  | 23 | 31.72 | 6.57 | 49.72 |
| chr9 | 124619092 | 124619914 | 823  | 533  | 20 | 39.95 | 4.52 | 46.75 |
| chr9 | 124784685 | 124785587 | 903  | 263  | 21 | 39.34 | 4.93 | 46.61 |
| chr9 | 125582021 | 125583531 | 1511 | 932  | 33 | 39.19 | 4.09 | 46.25 |
| chr9 | 125811283 | 125812487 | 1205 | 474  | 32 | 34.05 | 4.14 | 48.51 |
| chr9 | 125957024 | 125958210 | 1187 | 359  | 32 | 43.88 | 4.98 | 47.98 |
| chr9 | 126121293 | 126121872 | 580  | 290  | 16 | 34.22 | 6.09 | 47.93 |
| chr9 | 126447230 | 126448455 | 1226 | 942  | 30 | 54.72 | 5.34 | 54.47 |
| chr9 | 126529409 | 126530235 | 827  | 560  | 20 | 37.38 | 5.12 | 46.66 |
| chr9 | 126590901 | 126591844 | 944  | 404  | 20 | 31.87 | 5.25 | 49.75 |
| chr9 | 126929863 | 126931707 | 1845 | 649  | 36 | 41.93 | 4.11 | 46.97 |
| chr9 | 126935976 | 126937486 | 1511 | 1212 | 31 | 42.79 | 4.52 | 47.43 |
| chr9 | 126992714 | 126993412 | 699  | 289  | 17 | 30.8  | 4.95 | 51.02 |
| chr9 | 127630489 | 127631918 | 1430 | 728  | 36 | 31.8  | 3.34 | 49.83 |
| chr9 | 127741748 | 127742676 | 929  | 280  | 21 | 37.75 | 5.34 | 46.67 |
| chr9 | 127866479 | 127867752 | 1274 | 582  | 26 | 31.55 | 5.39 | 49.99 |
| chr9 | 127994626 | 127996505 | 1880 | 1471 | 44 | 39.75 | 5.6  | 46.66 |
| chr9 | 128697948 | 128698896 | 949  | 659  | 20 | 32.43 | 5.34 | 49.57 |
| chr9 | 129262853 | 129263784 | 932  | 291  | 21 | 37.57 | 6.98 | 45.87 |
| chr9 | 129643598 | 129644432 | 835  | 588  | 19 | 34.69 | 6.16 | 47.81 |
| chr9 | 129767488 | 129768367 | 880  | 603  | 19 | 32.09 | 5.34 | 49.72 |
| chr9 | 129932821 | 129934078 | 1258 | 771  | 28 | 44.14 | 5.75 | 48.01 |
| chr9 | 130035684 | 130036521 | 838  | 455  | 19 | 31.29 | 5.39 | 50.32 |
| chr9 | 131331052 | 131332190 | 1139 | 544  | 24 | 34.45 | 5.75 | 47.75 |
| chr9 | 131572526 | 131573330 | 805  | 266  | 18 | 32.14 | 4.93 | 49.83 |
| chr9 | 131684709 | 131685533 | 825  | 384  | 19 | 35.3  | 4.93 | 47.33 |
| chr9 | 131790986 | 131792302 | 1317 | 814  | 29 | 39.59 | 4.19 | 46.6  |
| chr9 | 131940211 | 131941892 | 1682 | 1050 | 35 | 42.37 | 4.33 | 47.03 |
| chr9 | 132588617 | 132589302 | 686  | 291  | 16 | 30.55 | 6.16 | 51.28 |
| chr9 | 132717995 | 132719014 | 1020 | 625  | 22 | 31.68 | 6.85 | 49.82 |
| chr9 | 133729074 | 133730639 | 1566 | 1277 | 30 | 31.54 | 4.57 | 49.92 |
| chr9 | 134097518 | 134098861 | 1344 | 740  | 28 | 39.61 | 7.39 | 46.59 |
| chr9 | 134568468 | 134570317 | 1850 | 666  | 41 | 52.99 | 4.57 | 50.74 |
| chr9 | 135546699 | 135548612 | 1914 | 287  | 43 | 43.51 | 4.11 | 48.15 |
| chr9 | 139701493 | 139703154 | 1662 | 1120 | 41 | 30.51 | 3.42 | 51.29 |
| chr9 | 139759161 | 139760125 | 965  | 679  | 21 | 31.59 | 4.95 | 50.02 |
| chr9 | 139825525 | 139826543 | 1019 | 442  | 21 | 32.74 | 5.34 | 49.36 |
| chrX | 2827996   | 2828635   | 640  | 363  | 16 | 33.55 | 5.75 | 48.55 |
| chrX | 3629747   | 3630544   | 798  | 527  | 20 | 41.66 | 4.93 | 47.21 |
| chrX | 4351825   | 4352689   | 865  | 576  | 19 | 31.99 | 5.24 | 49.86 |
| chrX | 4533626   | 4534239   | 614  | 341  | 15 | 30.6  | 5.75 | 51.25 |
| chrX | 4538243   | 4539826   | 1584 | 649  | 31 | 43.01 | 3.7  | 47.48 |
| chrX | 4698812   | 4699632   | 821  | 552  | 19 | 35.54 | 4.11 | 47.22 |
| chrX | 5139233   | 5140463   | 1231 | 655  | 25 | 33.76 | 5.75 | 48.71 |

|      |          |          |      |      |    |       |      |       |
|------|----------|----------|------|------|----|-------|------|-------|
| chrX | 5305475  | 5306567  | 1093 | 326  | 24 | 36.84 | 4.93 | 46.89 |
| chrX | 5375364  | 5376392  | 1029 | 737  | 22 | 32.23 | 4.52 | 50.02 |
| chrX | 5786733  | 5787680  | 948  | 451  | 21 | 33.11 | 4.23 | 49.18 |
| chrX | 5873460  | 5874343  | 884  | 640  | 21 | 32.26 | 4.94 | 50.08 |
| chrX | 6555662  | 6556685  | 1024 | 681  | 23 | 36.51 | 4.52 | 46.95 |
| chrX | 6730537  | 6731498  | 962  | 450  | 22 | 31.75 | 4.95 | 49.84 |
| chrX | 6768770  | 6771615  | 2846 | 2439 | 65 | 35.71 | 4.06 | 47.23 |
| chrX | 6964628  | 6966270  | 1643 | 1241 | 31 | 40.27 | 4.52 | 46.87 |
| chrX | 6988876  | 6990397  | 1522 | 377  | 31 | 31.69 | 4.24 | 49.79 |
| chrX | 7004206  | 7005946  | 1741 | 789  | 38 | 31.96 | 3.45 | 49.78 |
| chrX | 7089994  | 7091062  | 1069 | 576  | 22 | 30.26 | 4.93 | 51.61 |
| chrX | 7892327  | 7893877  | 1551 | 720  | 38 | 53.95 | 5.46 | 52.47 |
| chrX | 8109908  | 8110782  | 875  | 242  | 19 | 32.37 | 4.11 | 49.85 |
| chrX | 8298895  | 8299496  | 602  | 323  | 18 | 46.81 | 6.98 | 47.29 |
| chrX | 8788148  | 8789177  | 1030 | 271  | 21 | 32.18 | 4.11 | 49.95 |
| chrX | 9069492  | 9070427  | 936  | 615  | 21 | 33.19 | 3.42 | 49.08 |
| chrX | 9380562  | 9381454  | 893  | 272  | 20 | 31.08 | 5.27 | 50.78 |
| chrX | 9636756  | 9637520  | 765  | 565  | 18 | 34.57 | 4.11 | 47.72 |
| chrX | 10016447 | 10017476 | 1030 | 349  | 23 | 36.18 | 5.75 | 46.84 |
| chrX | 10690621 | 10691460 | 840  | 404  | 20 | 38.84 | 5.34 | 46.24 |
| chrX | 11645221 | 11645895 | 675  | 386  | 17 | 35.9  | 6.16 | 47    |
| chrX | 12078295 | 12079625 | 1331 | 875  | 31 | 52.59 | 4.52 | 50.32 |
| chrX | 12892778 | 12893872 | 1095 | 432  | 23 | 32.79 | 5.75 | 49.41 |
| chrX | 12992234 | 12993828 | 1595 | 983  | 39 | 42.07 | 3.77 | 47.05 |
| chrX | 13009072 | 13009991 | 920  | 609  | 20 | 30.15 | 4.57 | 51.67 |
| chrX | 13012424 | 13013384 | 961  | 674  | 23 | 33.57 | 4.75 | 48.64 |
| chrX | 13289643 | 13290837 | 1195 | 572  | 24 | 31.75 | 5.75 | 49.81 |
| chrX | 13305761 | 13306950 | 1190 | 616  | 26 | 39.7  | 6.16 | 46.57 |
| chrX | 14008016 | 14008944 | 929  | 287  | 22 | 33.59 | 6.47 | 48.7  |
| chrX | 14064001 | 14065228 | 1228 | 611  | 26 | 37.72 | 5.34 | 46.53 |
| chrX | 14116409 | 14117086 | 678  | 409  | 16 | 31.05 | 5.34 | 50.56 |
| chrX | 14550656 | 14551552 | 897  | 484  | 19 | 31.16 | 4.93 | 50.56 |
| chrX | 14896643 | 14897396 | 754  | 283  | 19 | 37.73 | 5.12 | 46.59 |
| chrX | 15386662 | 15387603 | 942  | 273  | 22 | 36.98 | 5.34 | 46.95 |
| chrX | 15714269 | 15715408 | 1140 | 702  | 24 | 30.15 | 5.33 | 51.64 |
| chrX | 15739036 | 15739992 | 957  | 510  | 23 | 37.29 | 4.67 | 46.73 |
| chrX | 16043779 | 16044586 | 808  | 261  | 19 | 36.36 | 4.52 | 47.14 |
| chrX | 16599322 | 16600293 | 972  | 724  | 24 | 43.95 | 4.93 | 47.69 |
| chrX | 17642184 | 17643012 | 829  | 484  | 21 | 39.85 | 6.09 | 46.62 |
| chrX | 17717848 | 17718483 | 636  | 382  | 16 | 30.51 | 3.81 | 51.3  |
| chrX | 18382566 | 18383204 | 639  | 289  | 16 | 33.62 | 5.75 | 48.72 |
| chrX | 18541323 | 18542173 | 851  | 356  | 19 | 30.02 | 5.71 | 51.51 |
| chrX | 19714414 | 19715574 | 1161 | 639  | 26 | 33.18 | 5.05 | 49.1  |
| chrX | 20068042 | 20068993 | 952  | 258  | 20 | 32.27 | 4.11 | 50.07 |
| chrX | 20109494 | 20111080 | 1587 | 958  | 30 | 33.89 | 3.42 | 48.6  |
| chrX | 21090828 | 21091504 | 677  | 469  | 17 | 35.76 | 4.11 | 47.1  |
| chrX | 21143470 | 21144106 | 637  | 354  | 16 | 33.76 | 6.16 | 48.72 |
| chrX | 21422794 | 21424003 | 1210 | 812  | 28 | 46.89 | 6.98 | 47.64 |
| chrX | 21888244 | 21889243 | 1000 | 592  | 22 | 33.74 | 5.34 | 48.62 |
| chrX | 22095532 | 22096366 | 835  | 291  | 18 | 30.44 | 6.16 | 51.32 |
| chrX | 22354940 | 22355701 | 762  | 266  | 18 | 34.76 | 6.16 | 47.61 |
| chrX | 22712493 | 22713302 | 810  | 317  | 19 | 36.23 | 5.75 | 46.97 |

|      |          |          |      |      |    |       |      |       |
|------|----------|----------|------|------|----|-------|------|-------|
| chrX | 22910864 | 22911506 | 643  | 254  | 16 | 33.35 | 5.34 | 48.69 |
| chrX | 22978422 | 22979312 | 891  | 326  | 22 | 40.1  | 4.93 | 46.56 |
| chrX | 23284235 | 23285131 | 897  | 350  | 19 | 31.16 | 6.57 | 50.56 |
| chrX | 23335524 | 23336469 | 946  | 287  | 20 | 32.59 | 4.93 | 49.31 |
| chrX | 23648117 | 23649430 | 1314 | 640  | 29 | 45.15 | 6.57 | 48.84 |
| chrX | 24009493 | 24010270 | 778  | 230  | 19 | 38.31 | 6.16 | 46.37 |
| chrX | 24844505 | 24845189 | 685  | 399  | 16 | 30.61 | 6.16 | 51.15 |
| chrX | 25300769 | 25301636 | 868  | 267  | 19 | 32.76 | 5.34 | 49.36 |
| chrX | 26045245 | 26045994 | 750  | 534  | 17 | 31.07 | 4.93 | 50.77 |
| chrX | 26110927 | 26112098 | 1172 | 405  | 28 | 49.2  | 7.8  | 50.89 |
| chrX | 26446854 | 26447887 | 1034 | 262  | 22 | 31.98 | 5.75 | 49.84 |
| chrX | 27001872 | 27002864 | 993  | 468  | 23 | 38.27 | 5.75 | 46.26 |
| chrX | 27009271 | 27010198 | 928  | 182  | 20 | 33.57 | 4.93 | 48.57 |
| chrX | 27018692 | 27019576 | 885  | 452  | 19 | 31.81 | 4.52 | 49.78 |
| chrX | 27197283 | 27198396 | 1114 | 642  | 26 | 44    | 5.34 | 48    |
| chrX | 27246937 | 27248301 | 1365 | 629  | 28 | 38.57 | 7.39 | 46.12 |
| chrX | 27263086 | 27264061 | 976  | 701  | 20 | 31.01 | 4.93 | 50.49 |
| chrX | 28075246 | 28076631 | 1386 | 678  | 29 | 41.35 | 4.52 | 46.96 |
| chrX | 28729206 | 28730040 | 835  | 563  | 18 | 30.44 | 4.11 | 51.32 |
| chrX | 29073528 | 29074641 | 1114 | 497  | 28 | 47.34 | 4.57 | 48.31 |
| chrX | 29124840 | 29125678 | 839  | 335  | 18 | 30.22 | 4.52 | 51.69 |
| chrX | 29270205 | 29271016 | 812  | 547  | 18 | 31.74 | 4.52 | 49.76 |
| chrX | 29604318 | 29605220 | 903  | 273  | 20 | 34.99 | 4.93 | 47.57 |
| chrX | 30296032 | 30296991 | 960  | 332  | 21 | 35.94 | 4.52 | 47.02 |
| chrX | 30533920 | 30534672 | 753  | 530  | 17 | 30.89 | 4.52 | 50.71 |
| chrX | 30601131 | 30602011 | 881  | 513  | 19 | 32.03 | 4.93 | 49.73 |
| chrX | 30685352 | 30686402 | 1051 | 432  | 21 | 31.13 | 6.57 | 50.63 |
| chrX | 31290333 | 31291398 | 1066 | 417  | 24 | 38.31 | 4.52 | 46.43 |
| chrX | 32292123 | 32292873 | 751  | 468  | 17 | 31.01 | 5.34 | 50.5  |
| chrX | 32333369 | 32334251 | 883  | 598  | 20 | 36.16 | 4.93 | 46.96 |
| chrX | 32550025 | 32551004 | 980  | 581  | 21 | 33.79 | 4.43 | 48.72 |
| chrX | 32626135 | 32627126 | 992  | 248  | 25 | 47.22 | 5.34 | 47.94 |
| chrX | 32865418 | 32866460 | 1043 | 614  | 26 | 48.44 | 8.22 | 49.19 |
| chrX | 33006584 | 33008323 | 1740 | 1142 | 38 | 36.06 | 3.97 | 47.04 |
| chrX | 33217666 | 33218427 | 762  | 480  | 17 | 30.36 | 5.34 | 51.65 |
| chrX | 33360859 | 33361800 | 942  | 653  | 23 | 36.91 | 5.33 | 46.79 |
| chrX | 34005730 | 34007319 | 1590 | 514  | 32 | 37.09 | 4.19 | 46.94 |
| chrX | 34484450 | 34485526 | 1077 | 372  | 24 | 37.71 | 5.75 | 46.49 |
| chrX | 34591421 | 34592318 | 898  | 654  | 20 | 35.28 | 5.34 | 47.36 |
| chrX | 35711359 | 35712020 | 662  | 382  | 16 | 32.08 | 5.34 | 49.79 |
| chrX | 36155475 | 36156236 | 762  | 279  | 17 | 30.36 | 4.11 | 51.65 |
| chrX | 37498979 | 37499884 | 906  | 491  | 23 | 43.69 | 5.75 | 47.99 |
| chrX | 37623391 | 37624690 | 1300 | 1050 | 30 | 50.13 | 5.34 | 51.56 |
| chrX | 37897512 | 37898290 | 779  | 288  | 19 | 38.24 | 5.75 | 46.29 |
| chrX | 37979784 | 37980499 | 716  | 456  | 18 | 37.83 | 4.93 | 46.66 |
| chrX | 38099487 | 38100237 | 751  | 476  | 18 | 33.42 | 5.12 | 48.7  |
| chrX | 38307295 | 38308341 | 1047 | 395  | 21 | 31.33 | 5.75 | 50.27 |
| chrX | 38969723 | 38970604 | 882  | 626  | 22 | 40.68 | 4.93 | 46.47 |
| chrX | 39646185 | 39647993 | 1809 | 1018 | 75 | 86.77 | 5.84 | 43.24 |
| chrX | 40907578 | 40908271 | 694  | 285  | 16 | 30.06 | 4.11 | 51.46 |
| chrX | 41259317 | 41260150 | 834  | 409  | 18 | 30.49 | 4.93 | 51.26 |
| chrX | 41295576 | 41296198 | 623  | 287  | 15 | 30.01 | 4.93 | 51.46 |

|      |          |          |      |      |    |       |      |       |
|------|----------|----------|------|------|----|-------|------|-------|
| chrX | 43549409 | 43550671 | 1263 | 638  | 28 | 43.86 | 5.34 | 47.89 |
| chrX | 43816455 | 43817333 | 879  | 615  | 19 | 32.14 | 4.11 | 49.88 |
| chrX | 44305197 | 44306058 | 862  | 596  | 20 | 37.44 | 4.93 | 46.3  |
| chrX | 44658730 | 44659456 | 727  | 299  | 19 | 41.9  | 5.34 | 46.94 |
| chrX | 44850564 | 44851567 | 1004 | 289  | 25 | 38.14 | 4.69 | 46.27 |
| chrX | 45223094 | 45224128 | 1035 | 392  | 26 | 43.81 | 5.33 | 47.82 |
| chrX | 45361777 | 45362450 | 674  | 393  | 16 | 31.3  | 4.52 | 50.33 |
| chrX | 46735647 | 46736737 | 1091 | 732  | 24 | 30.17 | 4.74 | 51.64 |
| chrX | 46810020 | 46810704 | 685  | 256  | 16 | 30.61 | 5.75 | 51.15 |
| chrX | 47516261 | 47517066 | 806  | 549  | 19 | 36.48 | 6.16 | 47.06 |
| chrX | 47630716 | 47632197 | 1482 | 760  | 32 | 48.18 | 5.75 | 49.51 |
| chrX | 48338809 | 48339531 | 723  | 437  | 18 | 37.34 | 5.34 | 46.8  |
| chrX | 49378350 | 49379274 | 925  | 371  | 20 | 33.74 | 6.57 | 48.66 |
| chrX | 49899287 | 49900004 | 718  | 470  | 17 | 33.04 | 4.52 | 49.11 |
| chrX | 50865693 | 50866769 | 1077 | 287  | 26 | 46.26 | 5.75 | 48.57 |
| chrX | 51015234 | 51015985 | 752  | 291  | 17 | 30.95 | 4.11 | 50.53 |
| chrX | 51232142 | 51234161 | 2020 | 660  | 44 | 59.45 | 6.16 | 55.15 |
| chrX | 51539937 | 51540844 | 908  | 438  | 21 | 39.03 | 7.39 | 46.21 |
| chrX | 51616553 | 51618650 | 2098 | 1497 | 41 | 32.79 | 5.14 | 49.42 |
| chrX | 52957278 | 52958634 | 1357 | 584  | 30 | 32.71 | 6.72 | 49.37 |
| chrX | 53072483 | 53073175 | 693  | 269  | 19 | 44.5  | 5.75 | 48.6  |
| chrX | 53410933 | 53411937 | 1005 | 618  | 24 | 31.28 | 4.79 | 50.43 |
| chrX | 54059943 | 54061015 | 1073 | 792  | 21 | 30.07 | 4.52 | 51.46 |
| chrX | 54191265 | 54192226 | 962  | 538  | 21 | 35.83 | 4.93 | 47.08 |
| chrX | 54938413 | 54939306 | 894  | 282  | 22 | 39.91 | 5.75 | 46.62 |
| chrX | 55113205 | 55114277 | 1073 | 331  | 21 | 30.07 | 4.52 | 51.46 |
| chrX | 55263181 | 55264109 | 929  | 254  | 21 | 37.75 | 5.34 | 46.67 |
| chrX | 55412456 | 55413161 | 706  | 267  | 17 | 33.81 | 5.34 | 48.84 |
| chrX | 55478241 | 55479403 | 1163 | 499  | 28 | 49.76 | 6.16 | 52.04 |
| chrX | 56768253 | 56769022 | 770  | 336  | 18 | 34.26 | 5.75 | 47.87 |
| chrX | 56853080 | 56853894 | 815  | 268  | 19 | 35.92 | 4.93 | 47.05 |
| chrX | 57850947 | 57851809 | 863  | 272  | 21 | 41.93 | 6.98 | 46.96 |
| chrX | 58453539 | 58454475 | 937  | 648  | 21 | 36.21 | 5.64 | 46.94 |
| chrX | 61860530 | 61861567 | 1038 | 457  | 24 | 39.91 | 6.57 | 46.65 |
| chrX | 62540536 | 62541162 | 627  | 360  | 16 | 34.46 | 5.34 | 47.79 |
| chrX | 62985437 | 62986749 | 1313 | 679  | 26 | 33.62 | 5.34 | 48.71 |
| chrX | 63411727 | 63412992 | 1266 | 547  | 31 | 56.65 | 6.98 | 53.38 |
| chrX | 63485362 | 63486199 | 838  | 267  | 18 | 30.27 | 5.34 | 51.68 |
| chrX | 64432368 | 64433423 | 1056 | 633  | 21 | 30.89 | 6.57 | 50.76 |
| chrX | 65627888 | 65628954 | 1067 | 638  | 23 | 34.21 | 6.16 | 47.92 |
| chrX | 66305775 | 66306339 | 565  | 282  | 16 | 37.66 | 6.57 | 46.06 |
| chrX | 66993905 | 66994800 | 896  | 242  | 20 | 35.39 | 4.93 | 47.63 |
| chrX | 67735134 | 67736002 | 869  | 585  | 20 | 37.01 | 5.34 | 46.95 |
| chrX | 69023425 | 69024410 | 986  | 549  | 20 | 30.51 | 5.34 | 51.28 |
| chrX | 69450259 | 69451309 | 1051 | 426  | 21 | 31.13 | 4.93 | 50.63 |
| chrX | 69513662 | 69514324 | 663  | 427  | 16 | 32.01 | 4.93 | 49.76 |
| chrX | 70182701 | 70184160 | 1460 | 778  | 31 | 39.71 | 4.19 | 46.55 |
| chrX | 70347671 | 70348789 | 1119 | 623  | 28 | 33.51 | 4.98 | 48.64 |
| chrX | 71017815 | 71018774 | 960  | 269  | 22 | 31.86 | 4.57 | 49.71 |
| chrX | 72829539 | 72830264 | 726  | 287  | 17 | 32.53 | 5.34 | 49.39 |
| chrX | 72830885 | 72831930 | 1046 | 268  | 23 | 35.32 | 4.52 | 47.4  |
| chrX | 72857433 | 72858487 | 1055 | 278  | 22 | 30.94 | 7.39 | 50.6  |

|      |          |          |      |      |    |       |      |       |
|------|----------|----------|------|------|----|-------|------|-------|
| chrX | 73048474 | 73049298 | 825  | 539  | 19 | 35.3  | 5.34 | 47.33 |
| chrX | 74500201 | 74501125 | 925  | 372  | 20 | 33.74 | 5.34 | 48.66 |
| chrX | 75198745 | 75199728 | 984  | 505  | 20 | 30.61 | 6.16 | 51.15 |
| chrX | 75387220 | 75388055 | 836  | 339  | 19 | 34.26 | 4.89 | 47.88 |
| chrX | 75641699 | 75642725 | 1027 | 505  | 21 | 32.33 | 4.52 | 49.98 |
| chrX | 76318238 | 76318929 | 692  | 409  | 17 | 31.25 | 4.19 | 50.51 |
| chrX | 76600188 | 76601256 | 1069 | 575  | 22 | 30.26 | 5.75 | 51.61 |
| chrX | 77116303 | 77117465 | 1163 | 592  | 24 | 33.27 | 5.75 | 48.95 |
| chrX | 78037162 | 78037990 | 829  | 289  | 19 | 31.28 | 5.71 | 50.44 |
| chrX | 78166669 | 78167396 | 728  | 266  | 18 | 37    | 5.34 | 47.02 |
| chrX | 80030070 | 80030880 | 811  | 525  | 22 | 35.23 | 4.45 | 47.23 |
| chrX | 80288463 | 80289498 | 1036 | 773  | 21 | 31.88 | 4.52 | 49.76 |
| chrX | 80308942 | 80309901 | 960  | 347  | 22 | 35.94 | 4.93 | 47.02 |
| chrX | 80650049 | 80650788 | 740  | 476  | 17 | 31.67 | 5.75 | 49.82 |
| chrX | 81955796 | 81956786 | 991  | 345  | 20 | 30.26 | 4.52 | 51.67 |
| chrX | 81961952 | 81962938 | 987  | 561  | 20 | 30.46 | 6.16 | 51.3  |
| chrX | 82275816 | 82277205 | 1390 | 452  | 36 | 59.67 | 6.09 | 55.82 |
| chrX | 82477778 | 82478566 | 789  | 504  | 18 | 33.09 | 5.34 | 49.16 |
| chrX | 82523516 | 82524448 | 933  | 446  | 23 | 41.93 | 6.16 | 47    |
| chrX | 82809110 | 82810197 | 1088 | 366  | 23 | 33.14 | 4.52 | 49.16 |
| chrX | 83193873 | 83194666 | 794  | 299  | 18 | 32.79 | 4.52 | 49.41 |
| chrX | 83615957 | 83617470 | 1514 | 632  | 30 | 36    | 4.72 | 47.09 |
| chrX | 83688360 | 83689160 | 801  | 290  | 19 | 33.51 | 4.23 | 48.63 |
| chrX | 84032592 | 84033359 | 768  | 501  | 17 | 30.01 | 5.34 | 51.49 |
| chrX | 84419855 | 84421058 | 1204 | 655  | 25 | 35.06 | 4.52 | 47.4  |
| chrX | 84926876 | 84927770 | 895  | 541  | 20 | 35.45 | 6.98 | 47.41 |
| chrX | 85121278 | 85122061 | 784  | 497  | 19 | 37.91 | 6.98 | 46.57 |
| chrX | 85180466 | 85182016 | 1551 | 594  | 32 | 30.85 | 3.73 | 50.91 |
| chrX | 85278313 | 85279274 | 962  | 236  | 23 | 33.31 | 5.1  | 48.74 |
| chrX | 85557023 | 85557949 | 927  | 288  | 22 | 37.87 | 6.57 | 46.67 |
| chrX | 85999821 | 86000659 | 839  | 261  | 18 | 30.22 | 4.52 | 51.69 |
| chrX | 86244275 | 86245003 | 729  | 414  | 18 | 36.93 | 4.93 | 46.83 |
| chrX | 86276608 | 86277547 | 940  | 672  | 20 | 32.91 | 6.16 | 49.24 |
| chrX | 86550101 | 86551096 | 996  | 271  | 20 | 30.01 | 4.52 | 51.45 |
| chrX | 87088028 | 87089226 | 1199 | 920  | 33 | 66.03 | 6.16 | 54.49 |
| chrX | 87382415 | 87382983 | 569  | 284  | 16 | 37.66 | 6.57 | 46.06 |
| chrX | 87565061 | 87566139 | 1079 | 265  | 26 | 41.08 | 5.71 | 46.36 |
| chrX | 87586005 | 87586885 | 881  | 623  | 20 | 36.28 | 5.34 | 46.9  |
| chrX | 87737912 | 87738774 | 863  | 613  | 19 | 33.05 | 4.52 | 49.1  |
| chrX | 88762532 | 88763402 | 871  | 288  | 19 | 32.59 | 5.75 | 49.42 |
| chrX | 89001186 | 89002100 | 915  | 438  | 20 | 34.3  | 6.16 | 47.81 |
| chrX | 89011340 | 89012288 | 949  | 291  | 25 | 38.45 | 4.79 | 46.37 |
| chrX | 89170670 | 89171658 | 989  | 279  | 21 | 30.33 | 4.19 | 51.58 |
| chrX | 90104388 | 90105204 | 817  | 532  | 18 | 31.45 | 4.52 | 50    |
| chrX | 90177213 | 90178477 | 1265 | 597  | 25 | 32.19 | 6.98 | 49.99 |
| chrX | 90358875 | 90359752 | 878  | 616  | 19 | 32.2  | 4.11 | 49.92 |
| chrX | 90416468 | 90418413 | 1946 | 1524 | 42 | 71.64 | 7.39 | 54.37 |
| chrX | 91662541 | 91663416 | 876  | 284  | 19 | 32.31 | 4.93 | 50.09 |
| chrX | 91911757 | 91912650 | 894  | 271  | 22 | 39.91 | 4.52 | 46.62 |
| chrX | 92654215 | 92655039 | 825  | 558  | 18 | 30.99 | 4.52 | 50.47 |
| chrX | 92879384 | 92880512 | 1129 | 841  | 24 | 30.68 | 4.95 | 50.98 |
| chrX | 93942504 | 93943720 | 1217 | 631  | 28 | 41.15 | 6.85 | 46.33 |



|      |           |           |      |      |    |       |      |       |
|------|-----------|-----------|------|------|----|-------|------|-------|
| chrX | 94158413  | 94159153  | 741  | 307  | 17 | 31.61 | 5.75 | 49.92 |
| chrX | 94942473  | 94943267  | 795  | 511  | 19 | 37.19 | 5.75 | 46.82 |
| chrX | 95002366  | 95003559  | 1194 | 685  | 29 | 52.27 | 5.75 | 51.22 |
| chrX | 95013167  | 95014287  | 1121 | 654  | 26 | 38.64 | 5.71 | 46.1  |
| chrX | 96099837  | 96100908  | 1072 | 796  | 28 | 42.62 | 5.14 | 47.37 |
| chrX | 96189881  | 96190520  | 640  | 356  | 17 | 34.81 | 6.09 | 47.52 |
| chrX | 96190910  | 96191850  | 941  | 289  | 22 | 37.04 | 4.52 | 46.99 |
| chrX | 96399991  | 96401393  | 1403 | 784  | 29 | 40.51 | 7.39 | 46.93 |
| chrX | 96458203  | 96459162  | 960  | 283  | 22 | 35.94 | 4.93 | 47.02 |
| chrX | 96482835  | 96483933  | 1099 | 461  | 24 | 36.52 | 5.75 | 46.93 |
| chrX | 96722915  | 96723786  | 872  | 283  | 19 | 32.54 | 4.52 | 49.4  |
| chrX | 96890141  | 96891183  | 1043 | 438  | 22 | 31.53 | 5.75 | 49.89 |
| chrX | 97122726  | 97123568  | 843  | 285  | 19 | 34.21 | 5.34 | 47.87 |
| chrX | 97123695  | 97124594  | 900  | 668  | 19 | 31    | 5.34 | 50.47 |
| chrX | 97445349  | 97446216  | 868  | 381  | 22 | 41.16 | 6.12 | 46.44 |
| chrX | 98115297  | 98116085  | 789  | 530  | 18 | 33.09 | 5.34 | 49.16 |
| chrX | 98269084  | 98269791  | 708  | 424  | 17 | 33.68 | 4.93 | 48.62 |
| chrX | 98499821  | 98500869  | 1049 | 611  | 21 | 31.23 | 5.75 | 50.5  |
| chrX | 99355255  | 99356167  | 913  | 347  | 19 | 30.31 | 4.11 | 51.54 |
| chrX | 99587201  | 99588029  | 829  | 265  | 19 | 35.05 | 4.52 | 47.49 |
| chrX | 100035338 | 100036309 | 972  | 637  | 21 | 34.23 | 5.64 | 47.9  |
| chrX | 100351631 | 100352469 | 839  | 552  | 18 | 30.22 | 4.52 | 51.69 |
| chrX | 100688274 | 100689331 | 1058 | 504  | 24 | 38.76 | 6.16 | 46.02 |
| chrX | 100728226 | 100729518 | 1293 | 535  | 30 | 37.27 | 5.14 | 46.55 |
| chrX | 101122296 | 101122870 | 575  | 287  | 15 | 32.66 | 6.16 | 49.32 |
| chrX | 101924773 | 101925647 | 875  | 354  | 22 | 41.13 | 4.93 | 46.39 |
| chrX | 101945471 | 101946339 | 869  | 263  | 19 | 32.71 | 5.34 | 49.41 |
| chrX | 102216231 | 102217193 | 963  | 430  | 21 | 35.77 | 5.34 | 47.11 |
| chrX | 102302239 | 102303249 | 1011 | 740  | 23 | 37.24 | 5.75 | 46.69 |
| chrX | 102519895 | 102521053 | 1159 | 436  | 26 | 35.88 | 5.27 | 47.01 |
| chrX | 103316161 | 103317084 | 924  | 670  | 20 | 33.79 | 4.93 | 48.76 |
| chrX | 104081146 | 104081948 | 803  | 574  | 18 | 32.26 | 4.52 | 50.09 |
| chrX | 104380877 | 104381855 | 979  | 530  | 23 | 39.1  | 5.34 | 46.38 |
| chrX | 104501963 | 104502974 | 1012 | 634  | 24 | 41.45 | 6.16 | 47.03 |
| chrX | 105294372 | 105295187 | 816  | 546  | 18 | 31.51 | 5.34 | 49.84 |
| chrX | 105361837 | 105362694 | 858  | 559  | 21 | 42.26 | 4.93 | 47.24 |
| chrX | 105476581 | 105477264 | 684  | 280  | 17 | 32.93 | 4.68 | 49.36 |
| chrX | 105897586 | 105898673 | 1088 | 597  | 26 | 45.57 | 5.34 | 50.15 |
| chrX | 106120662 | 106121795 | 1134 | 545  | 25 | 38.68 | 5.75 | 46.16 |
| chrX | 106447602 | 106448953 | 1352 | 844  | 34 | 60.13 | 7.39 | 55.32 |
| chrX | 106874192 | 106875824 | 1633 | 1342 | 31 | 40.72 | 4.52 | 46.5  |
| chrX | 107244878 | 107245904 | 1027 | 527  | 22 | 32.33 | 5.34 | 49.98 |
| chrX | 107705281 | 107706758 | 1478 | 896  | 32 | 48.39 | 4.52 | 49.2  |
| chrX | 107971365 | 107973061 | 1697 | 626  | 35 | 31.39 | 4.11 | 50.23 |
| chrX | 108024451 | 108025891 | 1441 | 667  | 33 | 50.42 | 6.57 | 51.99 |
| chrX | 108140113 | 108140948 | 836  | 267  | 18 | 30.38 | 4.52 | 51.65 |
| chrX | 108232090 | 108233049 | 960  | 267  | 21 | 31.86 | 4.19 | 49.71 |
| chrX | 108618732 | 108619545 | 814  | 388  | 18 | 31.62 | 6.16 | 49.94 |
| chrX | 108702748 | 108703812 | 1065 | 452  | 24 | 33.92 | 5.33 | 48.73 |
| chrX | 108887959 | 108889274 | 1316 | 700  | 28 | 41.03 | 6.16 | 46.33 |
| chrX | 109133857 | 109134839 | 983  | 593  | 21 | 34.66 | 4.93 | 47.66 |
| chrX | 109171177 | 109171858 | 682  | 278  | 16 | 30.8  | 4.93 | 51    |

|      |           |           |      |      |    |       |      |       |
|------|-----------|-----------|------|------|----|-------|------|-------|
| chrX | 109655181 | 109656279 | 1099 | 728  | 24 | 32.16 | 4.57 | 49.88 |
| chrX | 109762908 | 109763780 | 873  | 625  | 20 | 36.77 | 4.52 | 46.92 |
| chrX | 110458041 | 110458794 | 754  | 546  | 17 | 30.83 | 4.11 | 50.9  |
| chrX | 110554659 | 110555462 | 804  | 516  | 18 | 32.2  | 4.93 | 49.96 |
| chrX | 111017198 | 111018627 | 1430 | 875  | 30 | 43    | 5.34 | 47.49 |
| chrX | 111559690 | 111560822 | 1133 | 396  | 23 | 30.96 | 5.34 | 50.53 |
| chrX | 112004211 | 112005535 | 1325 | 498  | 29 | 39.18 | 5.71 | 46.25 |
| chrX | 112212996 | 112213839 | 844  | 393  | 21 | 43.22 | 6.16 | 47.65 |
| chrX | 112564223 | 112565161 | 939  | 346  | 20 | 32.97 | 4.11 | 49.31 |
| chrX | 112777226 | 112778116 | 891  | 288  | 19 | 31.48 | 4.52 | 49.85 |
| chrX | 112885448 | 112886690 | 1243 | 665  | 25 | 33.2  | 4.52 | 49.09 |
| chrX | 112912874 | 112913907 | 1034 | 694  | 24 | 40.14 | 5.75 | 46.67 |
| chrX | 113298596 | 113299281 | 686  | 418  | 16 | 30.55 | 4.93 | 51.28 |
| chrX | 113401990 | 113402804 | 815  | 322  | 19 | 35.92 | 5.34 | 47.05 |
| chrX | 113507027 | 113508021 | 995  | 489  | 21 | 34.01 | 5.75 | 48.54 |
| chrX | 113567790 | 113568664 | 875  | 455  | 19 | 32.37 | 4.52 | 49.85 |
| chrX | 113897949 | 113898698 | 750  | 459  | 17 | 31.07 | 6.16 | 50.77 |
| chrX | 114114207 | 114115409 | 1203 | 911  | 29 | 51.69 | 5.75 | 51.38 |
| chrX | 116447895 | 116448854 | 960  | 438  | 20 | 31.84 | 5.75 | 49.73 |
| chrX | 117070824 | 117071506 | 683  | 456  | 17 | 35.35 | 6.57 | 47.45 |
| chrX | 117566585 | 117567822 | 1238 | 748  | 26 | 32.58 | 5.71 | 49.32 |
| chrX | 117764485 | 117765512 | 1028 | 741  | 29 | 57.96 | 6.09 | 53.42 |
| chrX | 117772696 | 117773721 | 1026 | 349  | 27 | 54.31 | 6.57 | 54.44 |
| chrX | 118713874 | 118714844 | 971  | 377  | 21 | 31.27 | 4.19 | 50.45 |
| chrX | 119162405 | 119163321 | 917  | 284  | 22 | 38.48 | 5.34 | 46.32 |
| chrX | 120134829 | 120135695 | 867  | 501  | 21 | 41.66 | 6.16 | 47.25 |
| chrX | 120165082 | 120165985 | 904  | 631  | 19 | 30.79 | 3.7  | 50.91 |
| chrX | 122361386 | 122362296 | 911  | 464  | 19 | 30.42 | 6.57 | 51.31 |
| chrX | 122820030 | 122821733 | 1704 | 1111 | 40 | 63.91 | 6.12 | 53.47 |
| chrX | 124066624 | 124067518 | 895  | 535  | 19 | 31.27 | 4.11 | 50.46 |
| chrX | 124149379 | 124150259 | 881  | 378  | 20 | 36.28 | 5.34 | 46.9  |
| chrX | 124431418 | 124432751 | 1334 | 548  | 27 | 35.84 | 6.52 | 47    |
| chrX | 124475953 | 124477060 | 1108 | 591  | 25 | 40.11 | 5.75 | 46.61 |
| chrX | 125314673 | 125315348 | 676  | 286  | 16 | 31.17 | 4.93 | 50.55 |
| chrX | 125336539 | 125337468 | 930  | 233  | 20 | 33.46 | 5.75 | 48.63 |
| chrX | 125380117 | 125380742 | 626  | 198  | 16 | 34.53 | 4.11 | 47.73 |
| chrX | 125417986 | 125418757 | 772  | 380  | 19 | 38.71 | 6.16 | 46.28 |
| chrX | 125600470 | 125601469 | 1000 | 284  | 21 | 33.74 | 4.93 | 48.62 |
| chrX | 126499163 | 126499994 | 832  | 325  | 18 | 30.6  | 4.93 | 51.25 |
| chrX | 126893753 | 126894869 | 1117 | 599  | 27 | 48.2  | 6.98 | 49.46 |
| chrX | 126920187 | 126921185 | 999  | 365  | 21 | 33.79 | 5.75 | 48.82 |
| chrX | 127113384 | 127114061 | 678  | 398  | 17 | 32.17 | 4.95 | 49.92 |
| chrX | 127608366 | 127608949 | 584  | 315  | 15 | 32.66 | 5.34 | 49.32 |
| chrX | 128547208 | 128548839 | 1632 | 1027 | 32 | 40.77 | 5.75 | 46.49 |
| chrX | 129511342 | 129512699 | 1358 | 726  | 28 | 38.92 | 5.75 | 46.31 |
| chrX | 130061988 | 130062923 | 936  | 681  | 20 | 33.13 | 4.93 | 49.14 |
| chrX | 130432593 | 130433567 | 975  | 416  | 20 | 31.07 | 4.52 | 50.75 |
| chrX | 130864647 | 130866407 | 1761 | 1441 | 32 | 33.93 | 4.43 | 48.73 |
| chrX | 130932186 | 130933935 | 1750 | 1151 | 43 | 65.98 | 5.51 | 53.85 |
| chrX | 130971574 | 130972294 | 721  | 348  | 17 | 32.85 | 5.34 | 49.39 |
| chrX | 130976873 | 130977693 | 821  | 555  | 20 | 30.57 | 4.11 | 51.23 |
| chrX | 131408690 | 131409511 | 822  | 543  | 24 | 37.3  | 3.74 | 46.75 |

|      |           |           |      |      |    |       |      |       |
|------|-----------|-----------|------|------|----|-------|------|-------|
| chrX | 131907916 | 131908781 | 866  | 275  | 19 | 32.88 | 4.52 | 49.29 |
| chrX | 131954150 | 131955106 | 957  | 686  | 20 | 32    | 4.11 | 49.74 |
| chrX | 131967693 | 131968447 | 755  | 320  | 18 | 35.21 | 6.16 | 47.17 |
| chrX | 132274620 | 132275397 | 778  | 445  | 19 | 38.31 | 4.93 | 46.37 |
| chrX | 132280899 | 132281950 | 1052 | 578  | 22 | 31.08 | 4.93 | 50.76 |
| chrX | 132830424 | 132831261 | 838  | 574  | 19 | 34.51 | 4.11 | 47.68 |
| chrX | 133069383 | 133070339 | 957  | 688  | 21 | 32.03 | 4.57 | 49.77 |
| chrX | 133459996 | 133461037 | 1042 | 505  | 26 | 42.63 | 6.02 | 47.37 |
| chrX | 133647513 | 133648925 | 1413 | 691  | 30 | 43.87 | 6.16 | 47.95 |
| chrX | 134400559 | 134401539 | 981  | 693  | 21 | 34.77 | 5.75 | 47.62 |
| chrX | 134611434 | 134612165 | 732  | 430  | 17 | 32.16 | 4.52 | 49.88 |
| chrX | 135038728 | 135039582 | 855  | 286  | 20 | 37.88 | 4.93 | 46.61 |
| chrX | 135222198 | 135222903 | 706  | 259  | 18 | 38.53 | 4.52 | 46.17 |
| chrX | 135772223 | 135773010 | 788  | 516  | 19 | 31.63 | 4.37 | 49.89 |
| chrX | 135879604 | 135880533 | 930  | 306  | 21 | 37.69 | 5.34 | 46.43 |
| chrX | 136506467 | 136507244 | 778  | 499  | 18 | 33.76 | 4.52 | 48.7  |
| chrX | 137977197 | 137977798 | 602  | 276  | 15 | 31.4  | 5.75 | 50.19 |
| chrX | 139391401 | 139392344 | 944  | 654  | 20 | 32.69 | 4.52 | 49.42 |
| chrX | 139549482 | 139550783 | 1302 | 648  | 26 | 34.13 | 6.16 | 48.08 |
| chrX | 140731370 | 140732286 | 917  | 626  | 19 | 30.1  | 4.93 | 51.55 |
| chrX | 141014917 | 141015672 | 756  | 324  | 17 | 30.71 | 4.93 | 51.03 |
| chrX | 141224718 | 141225854 | 1137 | 846  | 25 | 38.51 | 4.93 | 46.22 |
| chrX | 141310143 | 141310969 | 827  | 249  | 19 | 35.17 | 4.52 | 47.09 |
| chrX | 141647449 | 141648418 | 970  | 258  | 21 | 35.38 | 4.52 | 47.52 |
| chrX | 141968102 | 141968931 | 830  | 538  | 19 | 34.99 | 4.52 | 47.59 |
| chrX | 142895340 | 142896749 | 1410 | 381  | 33 | 52.19 | 5.75 | 51.36 |
| chrX | 143002158 | 143002821 | 664  | 285  | 18 | 41.65 | 6.98 | 47.1  |
| chrX | 143231681 | 143233055 | 1375 | 765  | 29 | 41.91 | 5.75 | 47.08 |
| chrX | 143371199 | 143371911 | 713  | 404  | 17 | 33.36 | 6.16 | 48.67 |
| chrX | 144229885 | 144230807 | 923  | 275  | 20 | 33.85 | 6.57 | 48.75 |
| chrX | 144259606 | 144260972 | 1367 | 710  | 28 | 38.48 | 5.75 | 46.37 |
| chrX | 144272131 | 144272956 | 826  | 539  | 19 | 35.24 | 4.52 | 47.26 |
| chrX | 144411493 | 144412267 | 775  | 250  | 18 | 33.95 | 5.34 | 48.68 |
| chrX | 144522180 | 144523011 | 832  | 220  | 19 | 34.87 | 4.93 | 47.65 |
| chrX | 145034572 | 145036157 | 1586 | 630  | 31 | 42.91 | 4.93 | 47.39 |
| chrX | 145487249 | 145488065 | 817  | 502  | 18 | 31.45 | 3.7  | 50    |
| chrX | 145599149 | 145601047 | 1899 | 1371 | 39 | 51.02 | 4.97 | 51.77 |
| chrX | 145921475 | 145922443 | 969  | 477  | 22 | 35.43 | 5.34 | 47.46 |
| chrX | 146691686 | 146692745 | 1060 | 644  | 21 | 30.69 | 4.93 | 51.01 |
| chrX | 146931642 | 146932679 | 1038 | 585  | 21 | 31.78 | 4.93 | 49.85 |
| chrX | 146938860 | 146939758 | 899  | 656  | 19 | 31.05 | 4.52 | 50.69 |
| chrX | 147238713 | 147239663 | 951  | 283  | 20 | 32.32 | 4.93 | 50.02 |
| chrX | 147472312 | 147473568 | 1257 | 588  | 25 | 32.55 | 6.16 | 49.37 |
| chrX | 147662660 | 147664274 | 1615 | 1078 | 36 | 31.74 | 5.03 | 49.78 |
| chrX | 148074226 | 148075322 | 1097 | 587  | 23 | 32.69 | 4.52 | 49.38 |
| chrX | 148283820 | 148284911 | 1092 | 636  | 35 | 85.39 | 8.63 | 51.28 |
| chrX | 148361726 | 148363170 | 1445 | 1125 | 30 | 42.24 | 4.52 | 47.01 |
| chrX | 148600310 | 148601910 | 1601 | 271  | 38 | 58.18 | 4.72 | 53.93 |
| chrX | 148706593 | 148707630 | 1038 | 650  | 22 | 31.78 | 4.93 | 49.85 |
| chrX | 148897920 | 148898831 | 912  | 566  | 21 | 34.58 | 4.57 | 47.71 |
| chrX | 149029140 | 149029976 | 837  | 462  | 18 | 30.33 | 5.75 | 51.59 |
| chrX | 149309993 | 149311024 | 1032 | 460  | 22 | 32.08 | 5.75 | 49.81 |

|      |           |           |      |      |     |        |      |       |
|------|-----------|-----------|------|------|-----|--------|------|-------|
| chrX | 149642696 | 149643673 | 978  | 378  | 21  | 34.93  | 3.7  | 47.58 |
| chrX | 149887958 | 149888818 | 861  | 355  | 20  | 32.37  | 4.84 | 49.76 |
| chrX | 150724901 | 150725590 | 690  | 411  | 20  | 50.01  | 6.16 | 51.72 |
| chrX | 151695282 | 151696264 | 983  | 641  | 21  | 34.66  | 5.34 | 47.66 |
| chrX | 152503909 | 152504659 | 751  | 269  | 18  | 35.47  | 4.93 | 47.45 |
| chrX | 152772836 | 152773515 | 680  | 290  | 16  | 30.92  | 6.16 | 50.56 |
| chrX | 153656575 | 153657540 | 966  | 553  | 21  | 35.6   | 5.34 | 47.23 |
| chrX | 154079411 | 154080300 | 890  | 352  | 22  | 40.16  | 6.98 | 46.66 |
| chrX | 154323003 | 154324660 | 1658 | 229  | 33  | 30.04  | 3.08 | 51.45 |
| chrX | 154468912 | 154470372 | 1461 | 887  | 32  | 43.34  | 3.81 | 47.84 |
| chrX | 154532275 | 154532979 | 705  | 437  | 17  | 30.42  | 4.95 | 51.34 |
| chrY | 1209962   | 1211200   | 1239 | 731  | 25  | 33.38  | 6.16 | 48.69 |
| chrY | 10035383  | 10036791  | 1409 | 1076 | 366 | 113.08 | 4.03 | 25    |
| chrY | 10037581  | 10038076  | 496  | 248  | 60  | 37.54  | 3    | 45.98 |
| chrY | 13292531  | 13293341  | 811  | 277  | 21  | 34.69  | 5.76 | 47.82 |
| chrY | 28583721  | 28584320  | 600  | 288  | 24  | 77.36  | 9.04 | 55.88 |

**Supplemental Table 5: Fold enrichment, p-values and fold changes of 20 genes. Top: ChIP-seq; Middle & Bottom: RNA-seq.**

| Chr:Start-End             | Length | Summit_position | TagCount | -10*LOG(p-value) | Fold_enric | hmFDR(%) | Peak_Class | Refseq_nSymbol   | Chr   | TSS       | TTS       | Strand | Peak_to_TSS |
|---------------------------|--------|-----------------|----------|------------------|------------|----------|------------|------------------|-------|-----------|-----------|--------|-------------|
| chr10:134198600-134199330 | 731    | 476             | 21       | 51.88            | 6.98       | 50.81    | upstream   | NM_0010 PWWP2B   | chr10 | 134210703 | 134231358 | +      | -11739      |
| chr10:134198600-134199330 | 731    | 476             | 21       | 51.88            | 6.98       | 50.81    | upstream   | NM_1384 PWWP2B   | chr10 | 134210703 | 134231358 | +      | -11739      |
| chr18:6461630-6463116     | 1487   | 736             | 32       | 42.01            | 6.85       | 47.03    | intergenic | NM_0013 L3MBTL4  | chr18 | 6415258   | 5954704   | -      | -47114      |
| chr2:31529054-31530433    | 1380   | 797             | 30       | 45.62            | 6.16       | 50.15    | intergenic | NM_0146 EHD3     | chr2  | 31457017  | 31492317  | +      | 72726       |
| chr18:6267203-6268076     | 874    | 376             | 22       | 41.2             | 5.75       | 46.62    | intron     | NM_0013 L3MBTL4  | chr18 | 6415258   | 5954704   | -      | 147619      |
| chr18:6452788-6453378     | 591    | 291             | 16       | 37.12            | 5.75       | 46.92    | intergenic | NM_0013 L3MBTL4  | chr18 | 6415258   | 5954704   | -      | -37824      |
| chr9:119662941-119663614  | 674    | 386             | 16       | 31.3             | 5.75       | 50.33    | intergenic | NM_0010 TRIM32   | chr9  | 119449583 | 119463578 | +      | 213694      |
| chr1:175101713-175102330  | 618    | 335             | 15       | 30.33            | 5.75       | 51.64    | intergenic | NM_0146 KIAA0040 | chr1  | 175161912 | 175126121 | -      | 59891       |
| chr1:175101713-175102330  | 618    | 335             | 15       | 30.33            | 5.75       | 51.64    | intergenic | NM_0013 KIAA0040 | chr1  | 175161912 | 175126121 | -      | 59891       |
| chr1:175101713-175102330  | 618    | 335             | 15       | 30.33            | 5.75       | 51.64    | intergenic | NM_0011 KIAA0040 | chr1  | 175161912 | 175126121 | -      | 59891       |
| chr12:104670404-104671014 | 611    | 281             | 15       | 30.8             | 5.75       | 51.01    | upstream   | NM_0012 TXNRD1   | chr12 | 104680809 | 104744085 | +      | -10101      |
| chr12:104670404-104671014 | 611    | 281             | 15       | 30.8             | 5.75       | 51.01    | upstream   | NM_0012 TXNRD1   | chr12 | 104680809 | 104744085 | +      | -10101      |
| chr12:104670404-104671014 | 611    | 281             | 15       | 30.8             | 5.75       | 51.01    | upstream   | NM_0033 TXNRD1   | chr12 | 104680809 | 104744085 | +      | -10101      |
| chr12:104670404-104671014 | 611    | 281             | 15       | 30.8             | 5.75       | 51.01    | upstream   | NM_1827 TXNRD1   | chr12 | 104680809 | 104744085 | +      | -10101      |
| chr12:104670404-104671014 | 611    | 281             | 15       | 30.8             | 5.75       | 51.01    | upstream   | NM_1827 TXNRD1   | chr12 | 104680809 | 104744085 | +      | -10101      |
| chr12:104670404-104671014 | 611    | 281             | 15       | 30.8             | 5.75       | 51.01    | upstream   | NM_1827 TXNRD1   | chr12 | 104680809 | 104744085 | +      | -10101      |
| chr1:55352422-55353509    | 1088   | 800             | 28       | 33.03            | 5.41       | 49.15    | promoter   | NM_0147 DHCR24   | chr1  | 55352868  | 55315299  | -      | -97         |
| chr12:26505898-26506782   | 885    | 605             | 19       | 31.81            | 5.34       | 49.78    | intron     | NM_0022 ITPR2    | chr12 | 26986127  | 26488284  | -      | 479788      |
| chr1:184058463-184059782  | 1320   | 479             | 28       | 40.82            | 5.34       | 46.34    | intron     | NM_0013 TSEN15   | chr1  | 184020863 | 184066619 | +      | 38259       |
| chr3:47078843-47079507    | 665    | 287             | 19       | 34.42            | 5.21       | 47.81    | exon       | NM_0141 SETD2    | chr3  | 47205467  | 47057897  | -      | 126293      |
| chr1:110658327-110658827  | 501    | 250             | 15       | 34.17            | 5.14       | 48.01    | intergenic | NM_2034 UBL4B    | chr1  | 110655064 | 110656569 | +      | 3512        |
| chr14:24102125-24102740   | 616    | 353             | 18       | 31.69            | 4.98       | 49.76    | upstream   | NM_0057 DHRS2    | chr14 | 24105572  | 24114848  | +      | -3140       |
| chr14:24102125-24102740   | 616    | 353             | 18       | 31.69            | 4.98       | 49.76    | upstream   | NM_1829 DHRS2    | chr14 | 24105572  | 24114848  | +      | -3140       |
| chr14:24131809-24132668   | 860    | 579             | 21       | 41.02            | 4.83       | 46.23    | intergenic | NM_0057 DHRS2    | chr14 | 24105572  | 24114848  | +      | 26666       |
| chr14:24131809-24132668   | 860    | 579             | 21       | 41.02            | 4.83       | 46.23    | intergenic | NM_1829 DHRS2    | chr14 | 24105572  | 24114848  | +      | 26666       |
| chr12:26703161-26704634   | 1474   | 769             | 41       | 38.3             | 4.63       | 46.38    | intron     | NM_0022 ITPR2    | chr12 | 26986127  | 26488284  | -      | 282230      |
| chr2:174783402-174784377  | 976    | 285             | 26       | 38.26            | 4.61       | 46.28    | intron     | NM_0010 SP3      | chr2  | 174828608 | 174765504 | -      | 44719       |
| chr7:155034163-155035297  | 1135   | 289             | 24       | 34.65            | 4.52       | 47.66    | intergenic | NM_1983 INSIG1   | chr7  | 155089481 | 155101945 | +      | -54752      |
| chr7:155034163-155035297  | 1135   | 289             | 24       | 34.65            | 4.52       | 47.66    | intergenic | NM_1983 INSIG1   | chr7  | 155089481 | 155101945 | +      | -54752      |
| chr7:155034163-155035297  | 1135   | 289             | 24       | 34.65            | 4.52       | 47.66    | intergenic | NM_0013 INSIG1   | chr7  | 155089481 | 155101945 | +      | -54752      |
| chr7:155034163-155035297  | 1135   | 289             | 24       | 34.65            | 4.52       | 47.66    | intergenic | NM_0013 INSIG1   | chr7  | 155089481 | 155101945 | +      | -54752      |
| chr7:155034163-155035297  | 1135   | 289             | 24       | 34.65            | 4.52       | 47.66    | intergenic | NM_0013 INSIG1   | chr7  | 155089481 | 155101945 | +      | -54752      |
| chr7:155034163-155035297  | 1135   | 289             | 24       | 34.65            | 4.52       | 47.66    | intergenic | NM_0013 INSIG1   | chr7  | 155089481 | 155101945 | +      | -54752      |
| chr7:155034163-155035297  | 1135   | 289             | 24       | 34.65            | 4.52       | 47.66    | intergenic | NM_0013 INSIG1   | chr7  | 155089481 | 155101945 | +      | -54752      |
| chr14:24239254-24240563   | 1310   | 594             | 30       | 31.89            | 4.48       | 49.82    | intergenic | NM_0057 DHRS2    | chr14 | 24105572  | 24114848  | +      | 134336      |
| chr14:24239254-24240563   | 1310   | 594             | 30       | 31.89            | 4.48       | 49.82    | intergenic | NM_1829 DHRS2    | chr14 | 24105572  | 24114848  | +      | 134336      |
| chr17:61580035-61581019   | 985    | 290             | 21       | 34.55            | 4.11       | 47.78    | intergenic | NM_1528 ACE      | chr17 | 61562206  | 61575734  | +      | 18320       |
| chr17:61580035-61581019   | 985    | 290             | 21       | 34.55            | 4.11       | 47.78    | intergenic | NM_0011 ACE      | chr17 | 61562206  | 61575734  | +      | 18320       |
| chr12:26576212-26577301   | 1090   | 287             | 25       | 30.33            | 4.11       | 51.64    | intron     | NM_0022 ITPR2    | chr12 | 26986127  | 26488284  | -      | 409371      |
| chr12:104585525-104586332 | 808    | 578             | 18       | 31.97            | 4.11       | 49.79    | intergenic | NM_0010 TXNRD1   | chr12 | 104609556 | 104744085 | +      | -23628      |
| chr14:70817101-70818891   | 1791   | 825             | 49       | 51.92            | 4          | 51.04    | intron     | NM_0012 COX16    | chr14 | 70826400  | 70791797  | -      | 8405        |
| chr14:70817101-70818891   | 1791   | 825             | 49       | 51.92            | 4          | 51.04    | intron     | NM_0164 COX16    | chr14 | 70826400  | 70791797  | -      | 8405        |
| chr20:3024419-3025652     | 1234   | 485             | 30       | 38.45            | 3.99       | 46.38    | promoter   | NM_0013 GNRH2    | chr20 | 3024267   | 3026393   | +      | 768         |
| chr20:3024419-3025652     | 1234   | 485             | 30       | 38.45            | 3.99       | 46.38    | promoter   | NM_0015 GNRH2    | chr20 | 3024267   | 3026393   | +      | 768         |
| chr20:3024419-3025652     | 1234   | 485             | 30       | 38.45            | 3.99       | 46.38    | promoter   | NM_1783 GNRH2    | chr20 | 3024267   | 3026393   | +      | 768         |
| chr20:3024419-3025652     | 1234   | 485             | 30       | 38.45            | 3.99       | 46.38    | promoter   | NM_1783 GNRH2    | chr20 | 3024267   | 3026393   | +      | 768         |
| chr10:1089042-1090655     | 1614   | 246             | 38       | 44.96            | 3.77       | 48.76    | intron     | NM_0013 IDI1     | chr10 | 1094826   | 1085091   | -      | 4978        |
| chr10:1089042-1090655     | 1614   | 246             | 38       | 44.96            | 3.77       | 48.76    | intron     | NM_0013 IDI1     | chr10 | 1094826   | 1085091   | -      | 4978        |
| chrX:149642696-149643673  | 978    | 378             | 21       | 34.93            | 3.7        | 47.58    | intron     | NM_0054 MAMLD1   | chrX  | 149613719 | 149682448 | +      | 29465       |
| chrX:149642696-149643673  | 978    | 378             | 21       | 34.93            | 3.7        | 47.58    | intron     | NM_0011 MAMLD1   | chrX  | 149613719 | 149682448 | +      | 29465       |

|                         |      |      |     |       |      |       |          |                |       |          |          |   |       |
|-------------------------|------|------|-----|-------|------|-------|----------|----------------|-------|----------|----------|---|-------|
| chr3:47161540-47166279  | 4740 | 4114 | 122 | 35.98 | 3.54 | 47.07 | exon     | NM_0141 SETD2  | chr3  | 47205467 | 47057897 | - | 41558 |
| chr12:56509321-56512097 | 2777 | 1256 | 75  | 34.17 | 3.42 | 48.01 | promoter | NM_0013 ZC3H10 | chr12 | 56512200 | 56521298 | + | -1492 |
| chr12:56509321-56512097 | 2777 | 1256 | 75  | 34.17 | 3.42 | 48.01 | promoter | NM_0327 ZC3H10 | chr12 | 56512049 | 56521298 | + | -1341 |
| chr12:56509321-56512097 | 2777 | 1256 | 75  | 34.17 | 3.42 | 48.01 | promoter | NM_0013 ZC3H10 | chr12 | 56512049 | 56521298 | + | -1341 |

| Track_id             | Gene_Nam | Locus                        | Strand | Gene_Type      | log2FC     | Fold_Cha | Sh1_FPKM  | shCtrl_FPKM | shCtrl  | Sh1     |
|----------------------|----------|------------------------------|--------|----------------|------------|----------|-----------|-------------|---------|---------|
| ENSG00000186150.4_2  | UBL4B    | chr1:110655090-              | +      | protein_coding | -2.8154478 | 0.14206  | 0         | 2.81545     | 6.03938 | 0       |
| ENSG00000186480.12_3 | INSIG1   | chr7:155089486-              | +      | protein_coding | -2.3529101 | 0.19575  | 3.147257  | 5.50017     | 44.2601 | 7.85969 |
| ENSG00000235750.9_2  | KIAA0040 | chr1:175126123-              | -      | protein_coding | -1.9501678 | 0.25879  | 4.2138025 | 6.16397     | 70.7034 | 17.5559 |
| ENSG00000171813.13_2 | PWWP2B   | chr10:134210672-             | +      | protein_coding | -1.8907695 | 0.26966  | 0.2918723 | 2.18264     | 3.53984 | 0.22423 |
| ENSG00000159640.15_3 | ACE      | chr17:61554422-              | +      | protein_coding | -1.7555982 | 0.29615  | 0.3550567 | 2.11065     | 3.31887 | 0.27904 |
| ENSG0000013016.15_3  | EHD3     | chr2:31457203-               | +      | protein_coding | -1.7476846 | 0.29778  | 4.6732451 | 6.42093     | 84.6826 | 24.5145 |
| ENSG00000125787.11_2 | GNRH2    | chr20:3024268-               | +      | protein_coding | -1.1892927 | 0.43852  | 0.370943  | 1.56024     | 1.94902 | 0.2932  |
| ENSG00000119401.10_3 | TRIM32   | chr9:119449581-              | +      | protein_coding | -1.1787283 | 0.44174  | 1.4286893 | 2.60742     | 5.09412 | 1.69202 |
| ENSG00000067064.10_3 | IDI1     | chr10:1085848-               | -      | protein_coding | -1.156443  | 0.44862  | 4.8654264 | 6.02187     | 63.9775 | 28.15   |
| ENSG00000116133.11_2 | DHCR24   | chr1:55315306-               | -      | protein_coding | -1.0705566 | 0.47614  | 4.3863123 | 5.45687     | 42.9219 | 19.9128 |
| ENSG00000133983.14_3 | COX16    | chr14:70791798-              | -      | protein_coding | -0.8842046 | 0.54179  | 4.5767711 | 5.46098     | 43.0471 | 22.8641 |
| ENSG00000198431.15_3 | TXNRD1   | chr12:104609557-             | +      | protein_coding | -0.7761519 | 0.58392  | 4.2673625 | 5.04351     | 31.9799 | 18.2577 |
| ENSG00000135482.6_3  | ZC3H10   | chr12:56511943-              | +      | protein_coding | -0.7686522 | 0.58697  | 0.4310136 | 1.19967     | 1.29686 | 0.34818 |
| ENSG00000198860.11_2 | TSEN15   | chr1:184020811-              | +      | protein_coding | -0.735994  | 0.6004   | 2.6701149 | 3.40611     | 9.60086 | 5.3648  |
| ENSG00000154655.15_4 | L3MBTL4  | chr18:5954705-               | -      | protein_coding | -0.7308002 | 0.60257  | 1.0144416 | 1.74524     | 2.35251 | 1.02012 |
| ENSG00000181555.20_4 | SETD2    | chr3:47057919-               | -      | protein_coding | -0.7028311 | 0.61437  | 3.86438   | 4.56721     | 22.7065 | 13.5645 |
| ENSG00000123104.11_3 | ITPR2    | chr12:26489448-              | -      | protein_coding | -0.6672393 | 0.62971  | 3.8208872 | 4.48813     | 21.442  | 13.1319 |
| ENSG00000100867.14_3 | DHRS2    | chr14:24099324-              | +      | protein_coding | -0.6180533 | 0.65155  | 0.5629773 | 1.18103     | 1.26739 | 0.47731 |
| ENSG00000172845.14_2 | SP3      | chr2:174771187-              | -      | protein_coding | -0.6104509 | 0.65499  | 3.6154335 | 4.22588     | 17.7119 | 11.2561 |
| ENSG00000013619.13_3 | MAMLD1   | chrX:149529689-<br>149682448 | +      | protein_coding | -0.5995709 | 0.65995  | 3.5901796 | 4.18975     | 17.2491 | 11.0435 |

| Track_id             | Gene_Nam | Locus            | Strand | Gene_Type      | log2FC     | Fold_Cha | Sh2_FPKM  | shCtrl_FPKM | shCtrl  | Sh2     |
|----------------------|----------|------------------|--------|----------------|------------|----------|-----------|-------------|---------|---------|
| ENSG00000186150.4_2  | UBL4B    | chr1:110655090-  | +      | protein_coding | -2.0344297 | 0.2441   | 0.781018  | 2.81545     | 6.03938 | 0.71834 |
| ENSG00000186480.12_3 | INSIG1   | chr7:155089486-  | +      | protein_coding | -1.905961  | 0.26684  | 3.5942061 | 5.50017     | 44.2601 | 11.0771 |
| ENSG00000159640.15_3 | ACE      | chr17:61554422-  | +      | protein_coding | -1.2849036 | 0.4104   | 0.8257512 | 2.11065     | 3.31887 | 0.77246 |
| ENSG00000119401.10_3 | TRIM32   | chr9:119449581-  | +      | protein_coding | -1.2343116 | 0.42505  | 1.373106  | 2.60742     | 5.09412 | 1.59028 |
| ENSG00000013619.13_3 | MAMLD1   | chrX:149529689-  | +      | protein_coding | -1.2208796 | 0.42902  | 2.9688709 | 4.18975     | 17.2491 | 6.82923 |
| ENSG00000198860.11_2 | TSEN15   | chr1:184020811-  | +      | protein_coding | -1.1763851 | 0.44246  | 2.2297238 | 3.40611     | 9.60086 | 3.69044 |
| ENSG0000013016.15_3  | EHD3     | chr2:31457203-   | +      | protein_coding | -0.9939229 | 0.50211  | 5.4270069 | 6.42093     | 84.6826 | 42.0221 |
| ENSG00000125787.11_2 | GNRH2    | chr20:3024268-   | +      | protein_coding | -0.8827773 | 0.54232  | 0.6774584 | 1.56024     | 1.94902 | 0.59932 |
| ENSG00000067064.10_3 | IDI1     | chr10:1085848-   | -      | protein_coding | -0.8490045 | 0.55517  | 5.1728649 | 6.02187     | 63.9775 | 35.0734 |
| ENSG00000235750.9_2  | KIAA0040 | chr1:175126123-  | -      | protein_coding | -0.8149777 | 0.56842  | 5.3489925 | 6.16397     | 70.7034 | 39.7575 |
| ENSG00000154655.15_4 | L3MBTL4  | chr18:5954705-   | -      | protein_coding | -0.7877627 | 0.57924  | 0.9574791 | 1.74524     | 2.35251 | 0.94191 |
| ENSG00000100867.14_3 | DHRS2    | chr14:24099324-  | +      | protein_coding | -0.7794169 | 0.5826   | 0.4016137 | 1.18103     | 1.26739 | 0.32098 |
| ENSG00000135482.6_3  | ZC3H10   | chr12:56511943-  | +      | protein_coding | -0.7524094 | 0.59361  | 0.4472564 | 1.19967     | 1.29686 | 0.36344 |
| ENSG00000172845.14_2 | SP3      | chr2:174771187-  | -      | protein_coding | -0.6993889 | 0.61583  | 3.5264955 | 4.22588     | 17.7119 | 10.5234 |
| ENSG00000198431.15_3 | TXNRD1   | chr12:104609557- | +      | protein_coding | -0.6954616 | 0.61751  | 4.3480528 | 5.04351     | 31.9799 | 19.3655 |
| ENSG00000171813.13_2 | PWWP2B   | chr10:134210672- | +      | protein_coding | -0.6783238 | 0.62489  | 1.5043179 | 2.18264     | 3.53984 | 1.83691 |
| ENSG00000123104.11_3 | ITPR2    | chr12:26489448-  | -      | protein_coding | -0.6770263 | 0.62545  | 3.8111001 | 4.48813     | 21.442  | 13.0364 |
| ENSG00000116133.11_2 | DHCR24   | chr1:55315306-   | -      | protein_coding | -0.675841  | 0.62597  | 4.7810278 | 5.45687     | 42.9219 | 26.4937 |
| ENSG00000181555.20_4 | SETD2    | chr3:47057919-   | -      | protein_coding | -0.6352772 | 0.64382  | 3.9319339 | 4.56721     | 22.7065 | 14.2627 |
| ENSG00000133983.14_3 | COX16    | chr14:70791798-  | -      | protein_coding | -0.6061028 | 0.65697  | 4.8548729 | 5.46098     | 43.0471 | 27.9376 |

## Supplemental Data of SOX9 Sanger Sequencing

SOX9 Sanger sequencing was attempted on DNA extracted from archived paraffin sections in 8 SOX9-positive DLBCL cases. Because of the high GC content of SOX9 (67% in the coding region) and the suboptimal DNA quality, amplicon generation and sequencing was very challenging. In one case, no amplicons were successfully generated. In the other cases, only a portion of the SOX9 coding region can be sequenced (See table below).

|    | <b>#1</b><br>373-553 | <b>#2</b><br>539-803 | <b>#3a</b><br>803-883 | <b>#3b</b><br>882-1057 | <b>#4</b><br>1058-1248 | <b>#5</b><br>1192-1325 | <b>#6</b><br>1271-1551 | <b>#7</b><br>1332-1615 | <b>#8</b><br>1572-1689 | <b>#9a</b><br>1668-1864 | <b>#9a</b><br>1788-1902 |
|----|----------------------|----------------------|-----------------------|------------------------|------------------------|------------------------|------------------------|------------------------|------------------------|-------------------------|-------------------------|
| #1 | NA                   | NA                   | NA                    | NA                     | NA                     | NA                     | NA                     | NA                     | NA                     | NA                      |                         |
| #2 | NA                   | NA                   |                       | NA                     | NA                     |                        | NA                     | NA                     |                        | NA                      | NA                      |
| #3 | NA                   | NA                   | NA                    | NA                     |                        |                        | NA                     | NA                     |                        |                         | NA                      |
| #4 |                      | NA                   |                       | NA                     |                        |                        | NA                     | NA                     |                        |                         |                         |
| #5 | NA                   | NA                   | NA                    | NA                     | NA                     |                        | NA                     | NA                     | NA                     | NA                      | NA                      |
| #6 |                      | NA                   | NA                    | NA                     | NA                     |                        | NA                     | NA                     | NA                     | NA                      |                         |
| #7 |                      |                      |                       |                        | NA                     |                        | NA                     | NA                     |                        |                         |                         |
| #8 | NA                   | NA                   | NA                    | NA                     | NA                     | NA                     | NA                     | NA                     | NA                     | NA                      | NA                      |

The numbers indicated the nucleotide positions within the SOX9 mRNA sequence (NM\_000346). SOX9 coding sequence extends from 373 to 1902. Green indicates that the sequence within that region was successfully generated. NA, not amplified. CDS, coding sequence. No mutations were identified.

Primers used for Sanger sequencing

SOX9\_1 FW TTCTCGCCTTTCCCGGC

SOX9\_1 REV GTCCTCCTCGCTCTCCTTCT

SOX9\_2 FW GGAGAACACGTTCCCAAGG

SOX9\_2 REV CGGGGCGGGGCAAATCA

SOX9\_3a FW CGCTCAGGTCAGACTGCAATAA

SOX9\_3a REV CCGCGGCTGGTACTTGTAAT

SOX9\_3b FW AGCACAAGAAGGACCACCC

SOX9\_3b REV GAGATAGCTTGTCCGGTGGGG

SOX9\_4 FW TCTCGTGCTTGTTCTTTTATTGTCC

SOX9\_4 REV GGCAGGTAAGTGGTCAAACCTC

SOX9\_5 FW TATCGACTTCCGCGACGTG

SOX9\_5 REV GGTGCTGCTGATGCCGTAG

SOX9\_6 FW TTTGACCAGTACCTGCCGC

SOX9\_6 REV TCCGTCTTGATGTGCGTTCCG

SOX9\_7 FW CTACACGGGCAGCTACGG

SOX9\_7 REV GCTGTAGGCGATCTGTTGGG

SOX9\_8 FW CGAACGCACATCAAGACGGA

SOX9\_8 REV TGGTGGTCGGTGTAGTCGTA



SOX9\_9a FW CCACACTACAGCCCCTCCTA

SOX9\_9a REV TGTGTAGACGGGTTGTTCCC

SOX9\_9b FW TTCACCTACATGAACCCCGC

SOX9\_9b REV ATCATCTCGGCCATCTTCGC
